# Supplementary material
Source: MDPI journal article supplement (https://www.mdpi.com/2304-6740/9/10/76)
Supplement: s1 [file s1]

Archive with 6 entries (6 files):
- __MACOSX/._Supplementary Materials_rev.pdf
- checkcif_2.pdf
- checkcif_3.pdf
- CIF_2.cif
- CIF_3.cif
- Supplementary Materials_rev.pdf
