# Supplementary material
Source: MDPI journal article supplement (https://www.mdpi.com/2304-6740/9/10/76)
Supplement: s1 [file s1 › CIF_2.cif]

data_global
_audit_creation_date                               2021-09-24
_audit_creation_method                            'by CrystalStructure 4.3'
_audit_update_record                               ?

#==============================================================================
# PROCESSING SUMMARY (IUCr Office Use Only)

_journal_date_recd_electronic                      ?
_journal_date_from_coeditor                        ?
_journal_date_accepted                             ?
_journal_coeditor_code                             ?

#==============================================================================
# SUBMISSION DETAILS

_publ_contact_author_name                         'ENTER NAME'
_publ_contact_author_email                        'ENTER EMAIL ADDRESS'
_publ_contact_author_fax                          'ENTER FAX NUMBER'
_publ_contact_author_phone                        'ENTER PHONE NUMBER'
_publ_contact_letter
;
    ENTER TEXT OF LETTER
;
_publ_requested_journal                           'ENTER JOURNAL NAME HERE'
_publ_requested_category
                                               'CHOOSE FI FM FO CI CM CO or AD'
_publ_requested_coeditor_name                      ?

#==============================================================================
# TITLE AND AUTHOR LIST

_publ_section_title
;
    ENTER SECTION TITLE
;
_publ_section_title_footnote
;
    ENTER FOOTNOTE TO TITLE OF PAPER
;
loop_
_publ_author_name
_publ_author_footnote
_publ_author_address
' FIRST AUTHORS NAME '
;
  FIRST AUTHORS FOOTNOTES
;
;
  FIRST AUTHORS ADDRESS
;
_publ_section_synopsis
;
    ENTER SYNOPSIS
;

#==============================================================================
# TEXT

_publ_section_abstract
;
    ENTER ABSTRACT
;
_publ_section_comment
;
    ENTER TEXT
;
_publ_section_references
;
    ENTER OTHER REFERENCES

    Rigaku (2018). CrystalStructure. Version 4.3. 
    Rigaku Corporation, Tokyo, Japan.

    Sheldrick, G. M. (2014). Acta Cryst. (2014). A70, C1437.
    SHELXT Version 2014/5

    Sheldrick, G.M. (2008) SHELXL Version 2014/7, Acta Cryst. A64, 112-122.

    Rigaku (1998). REQAB. 
    Rigaku Corporation, Tokyo, Japan.

;
_publ_section_figure_captions
;
    ENTER FIGURE CAPTIONS
;
_publ_section_exptl_prep
;
    ENTER COMPOUND PREPARATION DETAILS
;
_publ_section_exptl_refinement
;
    ENTER SPECIAL DETAILS OF THE REFINEMENT
;

#==============================================================================
data_PddpppCF3NN

#==============================================================================
# CHEMICAL DATA

_chemical_formula_sum                             'C31 H26 F6 N2 O2 P2 Pd'
_chemical_formula_moiety                          'C31 H26 F6 N2 O2 P2 Pd'
_chemical_formula_weight                           740.90
_chemical_melting_point                            ?

#==============================================================================
# CRYSTAL DATA
_space_group_crystal_system                        orthorhombic
_space_group_name_H-M_alt                         'P b c a'
_space_group_name_Hall                            '-P 2ac 2ab'
_space_group_IT_number                             61
loop_
_space_group_symop_id
_space_group_symop_operation_xyz
1   '+X,+Y,+Z'
2   '1/2+X,1/2-Y,-Z'
3   '-X,1/2+Y,1/2-Z'
4   '1/2-X,-Y,1/2+Z'
5   '-X,-Y,-Z'
6   '-1/2-X,-1/2+Y,+Z'
7   '+X,-1/2-Y,-1/2+Z'
8   '-1/2+X,+Y,-1/2-Z'
#------------------------------------------------------------------------------
_cell_length_a                                     14.952(6)
_cell_length_b                                     18.858(8)
_cell_length_c                                     22.029(9)
_cell_angle_alpha                                  90.0000
_cell_angle_beta                                   90.0000
_cell_angle_gamma                                  90.0000
_cell_volume                                       6211(4)
_cell_formula_units_Z                              8
_cell_measurement_reflns_used                      18427
_cell_measurement_theta_min                        3.07
_cell_measurement_theta_max                        27.48
_cell_measurement_temperature                      193
#------------------------------------------------------------------------------
_exptl_crystal_description                         prism
_exptl_crystal_colour                              yellow
_exptl_crystal_size_max                            0.200
_exptl_crystal_size_mid                            0.150
_exptl_crystal_size_min                            0.150
_exptl_crystal_density_diffrn                      1.584
_exptl_crystal_density_meas                        ?
_exptl_crystal_density_method                     'not measured'
_exptl_crystal_F_000                               2976.00
_exptl_absorpt_coefficient_mu                      0.769
_exptl_absorpt_correction_type                     multi-scan
_exptl_absorpt_process_details                    'REQAB (Rigaku, 1998)'
_exptl_absorpt_correction_T_min                    0.773
_exptl_absorpt_correction_T_max                    0.891

#==============================================================================
# EXPERIMENTAL DATA

_diffrn_ambient_temperature                        193
_diffrn_radiation_type                            'Mo K\a'
_diffrn_radiation_wavelength                       0.71075
_diffrn_measurement_device_type                   'Rigaku Saturn70'
_diffrn_measurement_method                         \w
_diffrn_detector_area_resol_mean                   7.314
_diffrn_reflns_number                              46879
_diffrn_reflns_av_unetI/netI                       0.0562
_diffrn_reflns_av_R_equivalents                    0.1107
_diffrn_reflns_theta_max                           27.484
_diffrn_reflns_theta_min                           3.154
_diffrn_reflns_theta_full                          25.242
_diffrn_measured_fraction_theta_max                0.996
_diffrn_measured_fraction_theta_full               0.995
_diffrn_reflns_Laue_measured_fraction_max          0.996
_diffrn_reflns_Laue_measured_fraction_full         0.995
_diffrn_reflns_point_group_measured_fraction_max   0.996
_diffrn_reflns_point_group_measured_fraction_full  0.995
_diffrn_reflns_limit_h_min                        -19
_diffrn_reflns_limit_h_max                         15
_diffrn_reflns_limit_k_min                        -24
_diffrn_reflns_limit_k_max                         24
_diffrn_reflns_limit_l_min                        -28
_diffrn_reflns_limit_l_max                         28
_diffrn_standards_number                           0
_diffrn_standards_interval_count                   .
_diffrn_standards_decay_%                          ?
_reflns_number_total                               7096
_reflns_number_gt                                  6811
_reflns_threshold_expression                       F^2^>2.0\s(F^2^)
_reflns_Friedel_coverage          0.000
_reflns_Friedel_fraction_max      .
_reflns_Friedel_fraction_full     .

#==============================================================================
# REFINEMENT DATA

_refine_special_details
;
    Refinement was performed using all reflections. The weighted 
    R-factor (wR) and goodness of fit (S) are based on F^2^.
    R-factor (gt) are based on F. The threshold expression of
    F^2^ > 2.0 sigma(F^2^) is used only for calculating R-factor (gt).
;
_refine_ls_structure_factor_coef                   Fsqd
_refine_ls_R_factor_all                            0.0789
_refine_ls_R_factor_gt                             0.0742
_refine_ls_wR_factor_ref                           0.1593
_refine_ls_wR_factor_gt                            0.1572
_refine_ls_number_restraints                       0
_refine_ls_hydrogen_treatment                      constr
_refine_ls_number_reflns                           7096
_refine_ls_number_parameters                       397
_refine_ls_goodness_of_fit_ref                     1.368
_refine_ls_weighting_scheme                        calc
_refine_ls_weighting_details
          'w = 1/[\s^2^(Fo^2^)+(0.0420P)^2^+15.4250P] where P=(Fo^2^+2Fc^2^)/3'
_atom_sites_solution_hydrogens                     geom
_atom_sites_solution_primary                       direct
_atom_sites_solution_secondary                     difmap
_refine_ls_shift/su_max                            0.001
_refine_diff_density_max                           1.21
_refine_diff_density_min                          -0.58
_refine_ls_extinction_method                       none
_refine_ls_extinction_coef                         ?

loop_
_atom_type_symbol
_atom_type_description
_atom_type_scat_dispersion_real
_atom_type_scat_dispersion_imag
_atom_type_scat_source
  'C' 'C'  0.0033 0.0016 
;
International Tables for Crystallography
(Vol. C, Tables 4.2.6.8 and 6.1.1.4)
;
  'H' 'H'  0.0000 0.0000 
;
International Tables for Crystallography
(Vol. C, Table 6.1.1.4)
;
  'F' 'F'  0.0171 0.0103 
;
International Tables for Crystallography
(Vol. C, Tables 4.2.6.8 and 6.1.1.4)
;
  'N' 'N'  0.0061 0.0033 
;
International Tables for Crystallography
(Vol. C, Tables 4.2.6.8 and 6.1.1.4)
;
  'O' 'O'  0.0106 0.0060 
;
International Tables for Crystallography
(Vol. C, Tables 4.2.6.8 and 6.1.1.4)
;
  'P' 'P'  0.1023 0.0942 
;
International Tables for Crystallography
(Vol. C, Tables 4.2.6.8 and 6.1.1.4)
;
  'Pd' 'Pd'  -0.9988 1.0072 
;
International Tables for Crystallography
(Vol. C, Tables 4.2.6.8 and 6.1.1.4)
;

#==============================================================================
# ATOMIC COORDINATES AND THERMAL PARAMETERS

loop_
 _atom_site_label
 _atom_site_type_symbol
 _atom_site_fract_x
 _atom_site_fract_y
 _atom_site_fract_z
 _atom_site_U_iso_or_equiv
 _atom_site_adp_type
 _atom_site_occupancy
 _atom_site_site_symmetry_order  
 _atom_site_calc_flag
 _atom_site_refinement_flags_posn
 _atom_site_refinement_flags_adp
 _atom_site_refinement_flags_occupancy
 _atom_site_disorder_assembly
 _atom_site_disorder_group
Pd1 Pd 0.58432(2) 0.40941(2) 0.33962(2) 0.01907(12) Uani 1 1 d . . . . .
P1 P 0.57553(8) 0.49681(6) 0.27019(5) 0.0209(3) Uani 1 1 d . . . . .
P2 P 0.70156(8) 0.45982(7) 0.38879(6) 0.0236(3) Uani 1 1 d . . . . .
F1 F 0.6201(4) 0.1721(2) 0.3994(2) 0.0890(17) Uani 1 1 d . . . . .
F2 F 0.5605(3) 0.2210(2) 0.47696(17) 0.0651(12) Uani 1 1 d . . . . .
F3 F 0.4797(3) 0.16515(19) 0.41333(19) 0.0659(12) Uani 1 1 d . . . . .
F4 F 0.2575(2) 0.3338(2) 0.25017(19) 0.0543(10) Uani 1 1 d . . . . .
F5 F 0.3468(2) 0.24609(19) 0.25610(18) 0.0509(9) Uani 1 1 d . . . . .
F6 F 0.2946(2) 0.2949(2) 0.33779(17) 0.0528(10) Uani 1 1 d . . . . .
O1 O 0.5963(2) 0.32499(18) 0.39738(16) 0.0302(8) Uani 1 1 d . . . . .
O2 O 0.3910(2) 0.41873(19) 0.25601(18) 0.0336(8) Uani 1 1 d . . . . .
N1 N 0.4775(3) 0.2787(2) 0.34202(19) 0.0290(9) Uani 1 1 d . . . . .
N2 N 0.4789(3) 0.3461(2) 0.31288(18) 0.0239(8) Uani 1 1 d . . . . .
C1 C 0.5501(5) 0.2084(3) 0.4178(3) 0.0438(15) Uani 1 1 d . . . . .
C2 C 0.5391(4) 0.2764(3) 0.3825(2) 0.0286(11) Uani 1 1 d . . . . .
C3 C 0.4050(3) 0.3626(3) 0.2825(2) 0.0276(10) Uani 1 1 d . . . . .
C4 C 0.3263(4) 0.3078(3) 0.2820(3) 0.0385(13) Uani 1 1 d . . . . .
C5 C 0.6796(3) 0.5454(3) 0.2558(2) 0.0307(11) Uani 1 1 d . . . . .
H1 H 0.7208 0.5135 0.2336 0.037 Uiso 1 1 calc R U . . .
H2 H 0.6657 0.5856 0.2285 0.037 Uiso 1 1 calc R U . . .
C6 C 0.7292(3) 0.5746(3) 0.3109(2) 0.0310(11) Uani 1 1 d . . . . .
H3 H 0.7732 0.6105 0.2974 0.037 Uiso 1 1 calc R U . . .
H4 H 0.6859 0.5984 0.3382 0.037 Uiso 1 1 calc R U . . .
C7 C 0.7778(3) 0.5163(3) 0.3461(2) 0.0273(10) Uani 1 1 d . . . . .
H5 H 0.8208 0.5384 0.3745 0.033 Uiso 1 1 calc R U . . .
H6 H 0.8121 0.4867 0.3172 0.033 Uiso 1 1 calc R U . . .
C8 C 0.5547(3) 0.4644(3) 0.1932(2) 0.0251(10) Uani 1 1 d . . . . .
C9 C 0.5812(3) 0.3963(3) 0.1779(3) 0.0312(11) Uani 1 1 d . . . . .
H7 H 0.6034 0.3651 0.2081 0.037 Uiso 1 1 calc R U . . .
C10 C 0.5749(4) 0.3740(3) 0.1176(3) 0.0399(13) Uani 1 1 d . . . . .
H8 H 0.5927 0.3273 0.1069 0.048 Uiso 1 1 calc R U . . .
C11 C 0.5431(4) 0.4192(3) 0.0737(2) 0.0407(14) Uani 1 1 d . . . . .
H9 H 0.5392 0.4038 0.0327 0.049 Uiso 1 1 calc R U . . .
C12 C 0.5171(5) 0.4868(3) 0.0890(3) 0.0462(15) Uani 1 1 d . . . . .
H10 H 0.4950 0.5179 0.0586 0.055 Uiso 1 1 calc R U . . .
C13 C 0.5230(4) 0.5098(3) 0.1490(2) 0.0357(12) Uani 1 1 d . . . . .
H11 H 0.5051 0.5566 0.1595 0.043 Uiso 1 1 calc R U . . .
C14 C 0.4930(3) 0.5644(3) 0.2896(2) 0.0241(10) Uani 1 1 d . . . . .
C15 C 0.4947(4) 0.6328(3) 0.2660(2) 0.0347(12) Uani 1 1 d . . . . .
H12 H 0.5394 0.6454 0.2373 0.042 Uiso 1 1 calc R U . . .
C16 C 0.4323(5) 0.6824(3) 0.2837(3) 0.0491(16) Uani 1 1 d . . . . .
H13 H 0.4342 0.7289 0.2672 0.059 Uiso 1 1 calc R U . . .
C17 C 0.3673(4) 0.6649(3) 0.3251(3) 0.0480(16) Uani 1 1 d . . . . .
H14 H 0.3249 0.6995 0.3376 0.058 Uiso 1 1 calc R U . . .
C18 C 0.3632(4) 0.5966(3) 0.3488(3) 0.0384(13) Uani 1 1 d . . . . .
H15 H 0.3175 0.5843 0.3769 0.046 Uiso 1 1 calc R U . . .
C19 C 0.4260(3) 0.5466(3) 0.3314(2) 0.0291(11) Uani 1 1 d . . . . .
H16 H 0.4236 0.5001 0.3479 0.035 Uiso 1 1 calc R U . . .
C20 C 0.6679(3) 0.5155(3) 0.4522(2) 0.0299(11) Uani 1 1 d . . . . .
C21 C 0.5824(3) 0.5431(3) 0.4561(2) 0.0299(11) Uani 1 1 d . . . . .
H17 H 0.5394 0.5314 0.4260 0.036 Uiso 1 1 calc R U . . .
C22 C 0.5588(4) 0.5877(3) 0.5036(3) 0.0385(13) Uani 1 1 d . . . . .
H18 H 0.5000 0.6067 0.5058 0.046 Uiso 1 1 calc R U . . .
C23 C 0.6203(4) 0.6041(3) 0.5473(3) 0.0434(15) Uani 1 1 d . . . . .
H19 H 0.6040 0.6344 0.5800 0.052 Uiso 1 1 calc R U . . .
C24 C 0.7057(5) 0.5772(4) 0.5443(3) 0.0537(18) Uani 1 1 d . . . . .
H20 H 0.7480 0.5890 0.5749 0.064 Uiso 1 1 calc R U . . .
C25 C 0.7304(4) 0.5331(4) 0.4971(3) 0.0495(17) Uani 1 1 d . . . . .
H21 H 0.7895 0.5147 0.4951 0.059 Uiso 1 1 calc R U . . .
C26 C 0.7670(3) 0.3884(3) 0.4210(3) 0.0329(12) Uani 1 1 d . . . . .
C27 C 0.7453(5) 0.3606(4) 0.4778(3) 0.0563(18) Uani 1 1 d . . . . .
H22 H 0.7016 0.3830 0.5026 0.068 Uiso 1 1 calc R U . . .
C28 C 0.7887(6) 0.2995(5) 0.4976(4) 0.083(3) Uani 1 1 d . . . . .
H23 H 0.7751 0.2806 0.5365 0.100 Uiso 1 1 calc R U . . .
C29 C 0.8513(6) 0.2660(5) 0.4615(5) 0.089(3) Uani 1 1 d . . . . .
H24 H 0.8800 0.2239 0.4751 0.107 Uiso 1 1 calc R U . . .
C30 C 0.8712(5) 0.2936(4) 0.4068(4) 0.069(2) Uani 1 1 d . . . . .
H25 H 0.9145 0.2707 0.3821 0.082 Uiso 1 1 calc R U . . .
C31 C 0.8304(4) 0.3545(3) 0.3857(3) 0.0486(16) Uani 1 1 d . . . . .
H26 H 0.8458 0.3731 0.3470 0.058 Uiso 1 1 calc R U . . .

loop_
 _atom_site_aniso_label
 _atom_site_aniso_U_11
 _atom_site_aniso_U_22
 _atom_site_aniso_U_33
 _atom_site_aniso_U_23
 _atom_site_aniso_U_13
 _atom_site_aniso_U_12
Pd1 0.0177(2) 0.01884(18) 0.02061(19) 0.00211(13) -0.00008(13) 0.00011(13)
P1 0.0209(6) 0.0194(5) 0.0226(6) 0.0027(4) 0.0005(5) -0.0007(5)
P2 0.0195(6) 0.0290(6) 0.0223(6) 0.0008(5) -0.0004(5) -0.0001(5)
F1 0.106(4) 0.049(3) 0.111(4) 0.027(3) 0.030(3) 0.046(3)
F2 0.109(3) 0.046(2) 0.040(2) 0.0186(17) -0.012(2) -0.016(2)
F3 0.101(3) 0.0284(18) 0.069(3) 0.0128(18) -0.006(2) -0.023(2)
F4 0.0222(17) 0.063(2) 0.077(3) -0.012(2) -0.0101(17) -0.0048(16)
F5 0.044(2) 0.0387(19) 0.070(2) -0.0246(18) -0.0074(18) -0.0060(16)
F6 0.041(2) 0.063(2) 0.055(2) -0.0042(18) 0.0137(16) -0.0251(18)
O1 0.034(2) 0.0245(17) 0.0315(18) 0.0105(14) -0.0056(15) -0.0012(15)
O2 0.0273(19) 0.034(2) 0.040(2) 0.0043(16) -0.0070(16) -0.0013(15)
N1 0.037(2) 0.022(2) 0.029(2) 0.0004(17) 0.0052(18) -0.0036(18)
N2 0.024(2) 0.023(2) 0.024(2) 0.0013(16) -0.0004(16) -0.0019(16)
C1 0.067(4) 0.023(3) 0.041(3) 0.005(2) 0.005(3) 0.001(3)
C2 0.040(3) 0.019(2) 0.026(2) 0.0014(19) 0.008(2) 0.002(2)
C3 0.025(3) 0.026(2) 0.031(3) -0.005(2) 0.005(2) -0.003(2)
C4 0.027(3) 0.044(3) 0.044(3) -0.009(3) 0.002(2) -0.009(2)
C5 0.029(3) 0.033(3) 0.030(3) 0.007(2) 0.005(2) -0.007(2)
C6 0.027(3) 0.027(3) 0.039(3) 0.003(2) 0.003(2) -0.010(2)
C7 0.021(2) 0.033(3) 0.028(2) 0.000(2) 0.0010(19) -0.006(2)
C8 0.021(2) 0.027(2) 0.028(2) 0.0006(19) 0.0011(19) -0.0010(19)
C9 0.031(3) 0.029(3) 0.034(3) 0.002(2) -0.003(2) 0.005(2)
C10 0.051(4) 0.031(3) 0.038(3) -0.007(2) 0.001(3) 0.005(3)
C11 0.058(4) 0.041(3) 0.023(3) -0.007(2) -0.002(2) 0.000(3)
C12 0.070(4) 0.039(3) 0.029(3) 0.005(2) -0.006(3) 0.011(3)
C13 0.053(4) 0.024(3) 0.030(3) 0.003(2) -0.003(2) 0.009(2)
C14 0.025(2) 0.023(2) 0.025(2) -0.0017(18) -0.0027(19) 0.0013(19)
C15 0.043(3) 0.024(2) 0.037(3) 0.000(2) 0.002(2) 0.001(2)
C16 0.072(5) 0.026(3) 0.050(4) -0.001(3) 0.005(3) 0.015(3)
C17 0.051(4) 0.038(3) 0.056(4) -0.009(3) -0.004(3) 0.026(3)
C18 0.028(3) 0.046(3) 0.041(3) -0.010(3) 0.000(2) 0.010(2)
C19 0.029(3) 0.030(3) 0.029(3) -0.001(2) -0.002(2) 0.004(2)
C20 0.026(3) 0.040(3) 0.024(2) -0.004(2) 0.002(2) -0.007(2)
C21 0.027(3) 0.033(3) 0.030(3) 0.000(2) 0.005(2) -0.003(2)
C22 0.039(3) 0.037(3) 0.039(3) -0.006(2) 0.016(2) -0.008(2)
C23 0.054(4) 0.042(3) 0.034(3) -0.014(2) 0.014(3) -0.011(3)
C24 0.052(4) 0.074(5) 0.035(3) -0.021(3) -0.007(3) -0.008(3)
C25 0.032(3) 0.076(5) 0.041(3) -0.019(3) -0.010(3) 0.001(3)
C26 0.023(3) 0.037(3) 0.039(3) 0.007(2) -0.006(2) -0.001(2)
C27 0.051(4) 0.073(5) 0.045(4) 0.022(3) -0.007(3) 0.007(4)
C28 0.077(6) 0.089(6) 0.083(6) 0.055(5) -0.020(5) 0.000(5)
C29 0.055(5) 0.069(6) 0.144(9) 0.056(6) -0.020(6) 0.013(4)
C30 0.041(4) 0.049(4) 0.115(7) 0.017(4) 0.003(4) 0.013(3)
C31 0.036(3) 0.045(4) 0.065(4) 0.010(3) 0.002(3) 0.005(3)

#==============================================================================
_computing_data_collection
                                            'CrystalClear (Rigaku Corp., 2000)'
_computing_cell_refinement                         CrystalClear
_computing_data_reduction                          CrystalClear
_computing_structure_solution
                                      'SHELXT Version 2014/5 (Sheldrick, 2014)'
_computing_structure_refinement
                                      'SHELXL Version 2014/7 (Sheldrick, 2008)'
_computing_publication_material
                                          'CrystalStructure 4.3 (Rigaku, 2018)'
_computing_molecular_graphics                     'CrystalStructure 4.3'

#==============================================================================
# MOLECULAR GEOMETRY

_geom_special_details
;
 All esds (except the esd in the dihedral angle between two l.s. planes)
 are estimated using the full covariance matrix.  The cell esds are taken
 into account individually in the estimation of esds in distances, angles
 and torsion angles; correlations between esds in cell parameters are only
 used when they are defined by crystal symmetry.  An approximate (isotropic)
 treatment of cell esds is used for estimating esds involving l.s. planes.
;

loop_
 _geom_bond_atom_site_label_1
 _geom_bond_atom_site_label_2
 _geom_bond_distance
 _geom_bond_site_symmetry_2
 _geom_bond_publ_flag
Pd1 O1 2.046(3) . ?
Pd1 N2 2.063(4) . ?
Pd1 P1 2.2522(14) . ?
Pd1 P2 2.2695(14) . ?
P1 C14 1.825(5) . ?
P1 C8 1.830(5) . ?
P1 C5 1.834(5) . ?
P2 C26 1.810(5) . ?
P2 C20 1.819(5) . ?
P2 C7 1.821(5) . ?
F1 C1 1.315(8) . ?
F2 C1 1.334(7) . ?
F3 C1 1.335(7) . ?
F4 C4 1.337(7) . ?
F5 C4 1.333(7) . ?
F6 C4 1.340(7) . ?
O1 C2 1.296(6) . ?
O2 C3 1.228(6) . ?
N1 C2 1.283(7) . ?
N1 N2 1.424(6) . ?
N2 C3 1.329(6) . ?
C1 C2 1.508(7) . ?
C3 C4 1.565(7) . ?
C5 C6 1.526(7) . ?
C5 H1 0.9900 . ?
C5 H2 0.9900 . ?
C6 C7 1.529(7) . ?
C6 H3 0.9900 . ?
C6 H4 0.9900 . ?
C7 H5 0.9900 . ?
C7 H6 0.9900 . ?
C8 C13 1.380(7) . ?
C8 C9 1.385(7) . ?
C9 C10 1.395(8) . ?
C9 H7 0.9500 . ?
C10 C11 1.374(8) . ?
C10 H8 0.9500 . ?
C11 C12 1.374(8) . ?
C11 H9 0.9500 . ?
C12 C13 1.395(8) . ?
C12 H10 0.9500 . ?
C13 H11 0.9500 . ?
C14 C15 1.392(7) . ?
C14 C19 1.402(7) . ?
C15 C16 1.378(8) . ?
C15 H12 0.9500 . ?
C16 C17 1.373(9) . ?
C16 H13 0.9500 . ?
C17 C18 1.391(9) . ?
C17 H14 0.9500 . ?
C18 C19 1.384(7) . ?
C18 H15 0.9500 . ?
C19 H16 0.9500 . ?
C20 C21 1.383(7) . ?
C20 C25 1.400(7) . ?
C21 C22 1.389(7) . ?
C21 H17 0.9500 . ?
C22 C23 1.367(9) . ?
C22 H18 0.9500 . ?
C23 C24 1.377(9) . ?
C23 H19 0.9500 . ?
C24 C25 1.382(9) . ?
C24 H20 0.9500 . ?
C25 H21 0.9500 . ?
C26 C31 1.382(8) . ?
C26 C27 1.396(8) . ?
C27 C28 1.392(10) . ?
C27 H22 0.9500 . ?
C28 C29 1.382(13) . ?
C28 H23 0.9500 . ?
C29 C30 1.346(12) . ?
C29 H24 0.9500 . ?
C30 C31 1.382(9) . ?
C30 H25 0.9500 . ?
C31 H26 0.9500 . ?

loop_
 _geom_angle_atom_site_label_1
 _geom_angle_atom_site_label_2
 _geom_angle_atom_site_label_3
 _geom_angle
 _geom_angle_site_symmetry_1
 _geom_angle_site_symmetry_3
 _geom_angle_publ_flag
O1 Pd1 N2 78.13(15) . . ?
O1 Pd1 P1 175.46(11) . . ?
N2 Pd1 P1 100.67(11) . . ?
O1 Pd1 P2 87.78(11) . . ?
N2 Pd1 P2 165.65(11) . . ?
P1 Pd1 P2 93.59(5) . . ?
C14 P1 C8 109.6(2) . . ?
C14 P1 C5 105.4(2) . . ?
C8 P1 C5 98.6(2) . . ?
C14 P1 Pd1 113.02(16) . . ?
C8 P1 Pd1 113.28(16) . . ?
C5 P1 Pd1 115.72(17) . . ?
C26 P2 C20 106.2(3) . . ?
C26 P2 C7 107.4(2) . . ?
C20 P2 C7 103.4(2) . . ?
C26 P2 Pd1 107.04(18) . . ?
C20 P2 Pd1 113.25(17) . . ?
C7 P2 Pd1 118.80(17) . . ?
C2 O1 Pd1 109.6(3) . . ?
C2 N1 N2 109.5(4) . . ?
C3 N2 N1 115.0(4) . . ?
C3 N2 Pd1 130.1(3) . . ?
N1 N2 Pd1 113.5(3) . . ?
F1 C1 F3 106.7(5) . . ?
F1 C1 F2 107.5(6) . . ?
F3 C1 F2 105.8(5) . . ?
F1 C1 C2 111.7(5) . . ?
F3 C1 C2 113.3(5) . . ?
F2 C1 C2 111.4(5) . . ?
N1 C2 O1 128.7(5) . . ?
N1 C2 C1 117.8(5) . . ?
O1 C2 C1 113.5(5) . . ?
O2 C3 N2 125.7(5) . . ?
O2 C3 C4 115.9(5) . . ?
N2 C3 C4 118.4(5) . . ?
F5 C4 F4 105.8(5) . . ?
F5 C4 F6 108.4(5) . . ?
F4 C4 F6 106.0(5) . . ?
F5 C4 C3 113.9(4) . . ?
F4 C4 C3 109.9(5) . . ?
F6 C4 C3 112.3(4) . . ?
C6 C5 P1 117.0(4) . . ?
C6 C5 H1 108.0 . . ?
P1 C5 H1 108.0 . . ?
C6 C5 H2 108.0 . . ?
P1 C5 H2 108.0 . . ?
H1 C5 H2 107.3 . . ?
C7 C6 C5 112.0(4) . . ?
C7 C6 H3 109.2 . . ?
C5 C6 H3 109.2 . . ?
C7 C6 H4 109.2 . . ?
C5 C6 H4 109.2 . . ?
H3 C6 H4 107.9 . . ?
C6 C7 P2 112.6(3) . . ?
C6 C7 H5 109.1 . . ?
P2 C7 H5 109.1 . . ?
C6 C7 H6 109.1 . . ?
P2 C7 H6 109.1 . . ?
H5 C7 H6 107.8 . . ?
C13 C8 C9 120.1(5) . . ?
C13 C8 P1 120.3(4) . . ?
C9 C8 P1 119.1(4) . . ?
C8 C9 C10 119.5(5) . . ?
C8 C9 H7 120.3 . . ?
C10 C9 H7 120.3 . . ?
C11 C10 C9 120.4(5) . . ?
C11 C10 H8 119.8 . . ?
C9 C10 H8 119.8 . . ?
C12 C11 C10 120.0(5) . . ?
C12 C11 H9 120.0 . . ?
C10 C11 H9 120.0 . . ?
C11 C12 C13 120.2(5) . . ?
C11 C12 H10 119.9 . . ?
C13 C12 H10 119.9 . . ?
C8 C13 C12 119.8(5) . . ?
C8 C13 H11 120.1 . . ?
C12 C13 H11 120.1 . . ?
C15 C14 C19 118.7(5) . . ?
C15 C14 P1 123.2(4) . . ?
C19 C14 P1 118.1(4) . . ?
C16 C15 C14 120.8(5) . . ?
C16 C15 H12 119.6 . . ?
C14 C15 H12 119.6 . . ?
C15 C16 C17 120.2(6) . . ?
C15 C16 H13 119.9 . . ?
C17 C16 H13 119.9 . . ?
C16 C17 C18 120.2(5) . . ?
C16 C17 H14 119.9 . . ?
C18 C17 H14 119.9 . . ?
C19 C18 C17 119.8(6) . . ?
C19 C18 H15 120.1 . . ?
C17 C18 H15 120.1 . . ?
C18 C19 C14 120.3(5) . . ?
C18 C19 H16 119.9 . . ?
C14 C19 H16 119.9 . . ?
C21 C20 C25 119.0(5) . . ?
C21 C20 P2 121.4(4) . . ?
C25 C20 P2 119.6(4) . . ?
C20 C21 C22 120.6(5) . . ?
C20 C21 H17 119.7 . . ?
C22 C21 H17 119.7 . . ?
C23 C22 C21 119.8(6) . . ?
C23 C22 H18 120.1 . . ?
C21 C22 H18 120.1 . . ?
C22 C23 C24 120.4(5) . . ?
C22 C23 H19 119.8 . . ?
C24 C23 H19 119.8 . . ?
C25 C24 C23 120.4(6) . . ?
C25 C24 H20 119.8 . . ?
C23 C24 H20 119.8 . . ?
C24 C25 C20 119.7(6) . . ?
C24 C25 H21 120.2 . . ?
C20 C25 H21 120.2 . . ?
C31 C26 C27 119.4(6) . . ?
C31 C26 P2 119.6(4) . . ?
C27 C26 P2 120.3(5) . . ?
C28 C27 C26 118.9(7) . . ?
C28 C27 H22 120.6 . . ?
C26 C27 H22 120.6 . . ?
C29 C28 C27 121.0(8) . . ?
C29 C28 H23 119.5 . . ?
C27 C28 H23 119.5 . . ?
C30 C29 C28 119.2(7) . . ?
C30 C29 H24 120.4 . . ?
C28 C29 H24 120.4 . . ?
C29 C30 C31 121.7(8) . . ?
C29 C30 H25 119.1 . . ?
C31 C30 H25 119.1 . . ?
C26 C31 C30 119.8(7) . . ?
C26 C31 H26 120.1 . . ?
C30 C31 H26 120.1 . . ?

loop_
 _geom_torsion_atom_site_label_1
 _geom_torsion_atom_site_label_2
 _geom_torsion_atom_site_label_3
 _geom_torsion_atom_site_label_4
 _geom_torsion
 _geom_torsion_site_symmetry_1
 _geom_torsion_site_symmetry_2
 _geom_torsion_site_symmetry_3
 _geom_torsion_site_symmetry_4
 _geom_torsion_publ_flag
C2 N1 N2 C3 -162.4(4) . . . . ?
C2 N1 N2 Pd1 5.7(5) . . . . ?
N2 N1 C2 O1 -0.1(7) . . . . ?
N2 N1 C2 C1 -178.7(4) . . . . ?
Pd1 O1 C2 N1 -5.5(7) . . . . ?
Pd1 O1 C2 C1 173.2(4) . . . . ?
F1 C1 C2 N1 104.3(7) . . . . ?
F3 C1 C2 N1 -16.3(7) . . . . ?
F2 C1 C2 N1 -135.4(5) . . . . ?
F1 C1 C2 O1 -74.5(7) . . . . ?
F3 C1 C2 O1 164.9(5) . . . . ?
F2 C1 C2 O1 45.8(7) . . . . ?
N1 N2 C3 O2 177.3(5) . . . . ?
Pd1 N2 C3 O2 11.6(8) . . . . ?
N1 N2 C3 C4 0.1(6) . . . . ?
Pd1 N2 C3 C4 -165.6(3) . . . . ?
O2 C3 C4 F5 120.2(6) . . . . ?
N2 C3 C4 F5 -62.3(7) . . . . ?
O2 C3 C4 F4 1.6(7) . . . . ?
N2 C3 C4 F4 179.1(4) . . . . ?
O2 C3 C4 F6 -116.2(6) . . . . ?
N2 C3 C4 F6 61.3(6) . . . . ?
C14 P1 C5 C6 74.4(4) . . . . ?
C8 P1 C5 C6 -172.4(4) . . . . ?
Pd1 P1 C5 C6 -51.3(5) . . . . ?
P1 C5 C6 C7 74.9(5) . . . . ?
C5 C6 C7 P2 -73.2(5) . . . . ?
C26 P2 C7 C6 173.9(4) . . . . ?
C20 P2 C7 C6 -74.0(4) . . . . ?
Pd1 P2 C7 C6 52.4(4) . . . . ?
C14 P1 C8 C13 34.5(5) . . . . ?
C5 P1 C8 C13 -75.4(5) . . . . ?
Pd1 P1 C8 C13 161.7(4) . . . . ?
C14 P1 C8 C9 -153.1(4) . . . . ?
C5 P1 C8 C9 97.0(4) . . . . ?
Pd1 P1 C8 C9 -25.9(5) . . . . ?
C13 C8 C9 C10 -0.4(8) . . . . ?
P1 C8 C9 C10 -172.8(4) . . . . ?
C8 C9 C10 C11 0.3(9) . . . . ?
C9 C10 C11 C12 -0.2(10) . . . . ?
C10 C11 C12 C13 0.2(10) . . . . ?
C9 C8 C13 C12 0.4(9) . . . . ?
P1 C8 C13 C12 172.7(5) . . . . ?
C11 C12 C13 C8 -0.3(10) . . . . ?
C8 P1 C14 C15 -74.0(5) . . . . ?
C5 P1 C14 C15 31.3(5) . . . . ?
Pd1 P1 C14 C15 158.6(4) . . . . ?
C8 P1 C14 C19 107.5(4) . . . . ?
C5 P1 C14 C19 -147.2(4) . . . . ?
Pd1 P1 C14 C19 -19.9(4) . . . . ?
C19 C14 C15 C16 0.6(8) . . . . ?
P1 C14 C15 C16 -178.0(5) . . . . ?
C14 C15 C16 C17 0.0(10) . . . . ?
C15 C16 C17 C18 -0.9(10) . . . . ?
C16 C17 C18 C19 1.2(9) . . . . ?
C17 C18 C19 C14 -0.6(8) . . . . ?
C15 C14 C19 C18 -0.3(7) . . . . ?
P1 C14 C19 C18 178.3(4) . . . . ?
C26 P2 C20 C21 -138.1(5) . . . . ?
C7 P2 C20 C21 109.0(5) . . . . ?
Pd1 P2 C20 C21 -20.9(5) . . . . ?
C26 P2 C20 C25 44.1(6) . . . . ?
C7 P2 C20 C25 -68.8(5) . . . . ?
Pd1 P2 C20 C25 161.3(5) . . . . ?
C25 C20 C21 C22 0.2(8) . . . . ?
P2 C20 C21 C22 -177.6(4) . . . . ?
C20 C21 C22 C23 -0.5(8) . . . . ?
C21 C22 C23 C24 0.4(9) . . . . ?
C22 C23 C24 C25 0.0(11) . . . . ?
C23 C24 C25 C20 -0.2(11) . . . . ?
C21 C20 C25 C24 0.1(10) . . . . ?
P2 C20 C25 C24 178.0(5) . . . . ?
C20 P2 C26 C31 -154.1(5) . . . . ?
C7 P2 C26 C31 -44.0(5) . . . . ?
Pd1 P2 C26 C31 84.6(5) . . . . ?
C20 P2 C26 C27 35.2(6) . . . . ?
C7 P2 C26 C27 145.3(5) . . . . ?
Pd1 P2 C26 C27 -86.0(5) . . . . ?
C31 C26 C27 C28 0.4(10) . . . . ?
P2 C26 C27 C28 171.1(6) . . . . ?
C26 C27 C28 C29 -1.0(13) . . . . ?
C27 C28 C29 C30 1.0(15) . . . . ?
C28 C29 C30 C31 -0.3(14) . . . . ?
C27 C26 C31 C30 0.2(10) . . . . ?
P2 C26 C31 C30 -170.6(5) . . . . ?
C29 C30 C31 C26 -0.3(12) . . . . ?


#==============================================================================
# Additional structures and associated data_? identifiers
# should be added at this point if there is more than one 
# structure analysis in the CIF.

_shelx_res_file
;

    shelxl.res created by SHELXL-2014/7

TITL PddpppCF3NN
CELL  0.71075 14.95210 18.85820 22.02890 90.00000 90.00000 90.00000
ZERR  8 0.00600 0.00750 0.00880 0.00000 0.00000 0.00000
LATT 1
SYMM .50+X, .50-Y,    -Z
SYMM    -X, .50+Y, .50-Z
SYMM .50-X,    -Y, .50+Z
SFAC C H F N O P PD
UNIT 248 208 48 16 16 16 8
L.S. 10
FMAP 2
PLAN 25
WPDB -2
HTAB
BOND $H
CONF
LIST 4
TEMP -79.8
ACTA
SIZE 0.150 0.150 0.200
WGHT    0.042000   15.425000
FVAR       0.26954
PD1   7    0.584318    0.409413    0.339616    11.00000    0.01774    0.01884 =
         0.02061    0.00211   -0.00008    0.00011
P1    6    0.575534    0.496807    0.270191    11.00000    0.02089    0.01941 =
         0.02255    0.00271    0.00047   -0.00070
P2    6    0.701564    0.459823    0.388792    11.00000    0.01949    0.02899 =
         0.02225    0.00078   -0.00040   -0.00014
F1    3    0.620124    0.172085    0.399361    11.00000    0.10647    0.04909 =
         0.11131    0.02706    0.02986    0.04610
F2    3    0.560476    0.220956    0.476960    11.00000    0.10877    0.04641 =
         0.04011    0.01859   -0.01202   -0.01625
F3    3    0.479706    0.165151    0.413334    11.00000    0.10053    0.02836 =
         0.06894    0.01283   -0.00626   -0.02309
F4    3    0.257492    0.333805    0.250166    11.00000    0.02223    0.06325 =
         0.07748   -0.01205   -0.01007   -0.00475
F5    3    0.346796    0.246094    0.256098    11.00000    0.04405    0.03868 =
         0.06997   -0.02462   -0.00741   -0.00596
F6    3    0.294570    0.294944    0.337787    11.00000    0.04057    0.06308 =
         0.05482   -0.00422    0.01372   -0.02509
O1    5    0.596334    0.324990    0.397376    11.00000    0.03446    0.02450 =
         0.03154    0.01054   -0.00559   -0.00121
O2    5    0.390954    0.418729    0.256009    11.00000    0.02728    0.03369 =
         0.03981    0.00426   -0.00701   -0.00129
N1    4    0.477511    0.278707    0.342016    11.00000    0.03659    0.02181 =
         0.02873    0.00036    0.00517   -0.00358
N2    4    0.478918    0.346094    0.312877    11.00000    0.02444    0.02328 =
         0.02405    0.00126   -0.00043   -0.00190
C1    1    0.550098    0.208380    0.417771    11.00000    0.06742    0.02288 =
         0.04114    0.00542    0.00517    0.00051
C2    1    0.539098    0.276361    0.382498    11.00000    0.04039    0.01893 =
         0.02649    0.00139    0.00776    0.00157
C3    1    0.404979    0.362552    0.282497    11.00000    0.02511    0.02612 =
         0.03147   -0.00500    0.00490   -0.00251
C4    1    0.326254    0.307847    0.281982    11.00000    0.02750    0.04408 =
         0.04386   -0.00918    0.00205   -0.00883
C5    1    0.679607    0.545401    0.255762    11.00000    0.02876    0.03304 =
         0.03043    0.00703    0.00486   -0.00728
AFIX  23
H1    2    0.720807    0.513484    0.233601    11.00000   -1.20000
H2    2    0.665689    0.585609    0.228456    11.00000   -1.20000
AFIX   0
C6    1    0.729185    0.574589    0.310937    11.00000    0.02661    0.02716 =
         0.03911    0.00281    0.00302   -0.00995
AFIX  23
H3    2    0.773185    0.610478    0.297377    11.00000   -1.20000
H4    2    0.685924    0.598376    0.338192    11.00000   -1.20000
AFIX   0
C7    1    0.777759    0.516271    0.346109    11.00000    0.02116    0.03282 =
         0.02806   -0.00034    0.00102   -0.00550
AFIX  23
H5    2    0.820830    0.538368    0.374521    11.00000   -1.20000
H6    2    0.812111    0.486662    0.317238    11.00000   -1.20000
AFIX   0
C8    1    0.554734    0.464420    0.193181    11.00000    0.02056    0.02681 =
         0.02795    0.00058    0.00112   -0.00096
C9    1    0.581172    0.396327    0.177853    11.00000    0.03068    0.02909 =
         0.03374    0.00171   -0.00348    0.00541
AFIX  43
H7    2    0.603406    0.365066    0.208115    11.00000   -1.20000
AFIX   0
C10   1    0.574879    0.374028    0.117603    11.00000    0.05105    0.03110 =
         0.03768   -0.00657    0.00071    0.00519
AFIX  43
H8    2    0.592666    0.327314    0.106886    11.00000   -1.20000
AFIX   0
C11   1    0.543112    0.419225    0.073675    11.00000    0.05793    0.04093 =
         0.02313   -0.00723   -0.00165    0.00042
AFIX  43
H9    2    0.539164    0.403762    0.032719    11.00000   -1.20000
AFIX   0
C12   1    0.517056    0.486777    0.088973    11.00000    0.07030    0.03882 =
         0.02944    0.00548   -0.00593    0.01106
AFIX  43
H10   2    0.494957    0.517901    0.058561    11.00000   -1.20000
AFIX   0
C13   1    0.522955    0.509801    0.149034    11.00000    0.05311    0.02412 =
         0.02987    0.00333   -0.00321    0.00851
AFIX  43
H11   2    0.505143    0.556586    0.159502    11.00000   -1.20000
AFIX   0
C14   1    0.492992    0.564361    0.289616    11.00000    0.02465    0.02281 =
         0.02471   -0.00174   -0.00274    0.00134
C15   1    0.494678    0.632803    0.265986    11.00000    0.04290    0.02378 =
         0.03750    0.00002    0.00223    0.00103
AFIX  43
H12   2    0.539394    0.645446    0.237325    11.00000   -1.20000
AFIX   0
C16   1    0.432281    0.682427    0.283663    11.00000    0.07164    0.02596 =
         0.04956   -0.00129    0.00462    0.01546
AFIX  43
H13   2    0.434227    0.728939    0.267152    11.00000   -1.20000
AFIX   0
C17   1    0.367270    0.664896    0.325073    11.00000    0.05062    0.03791 =
         0.05552   -0.00911   -0.00433    0.02574
AFIX  43
H14   2    0.324944    0.699521    0.337554    11.00000   -1.20000
AFIX   0
C18   1    0.363184    0.596597    0.348809    11.00000    0.02806    0.04610 =
         0.04097   -0.01030    0.00047    0.00978
AFIX  43
H15   2    0.317470    0.584306    0.376850    11.00000   -1.20000
AFIX   0
C19   1    0.425962    0.546627    0.331419    11.00000    0.02868    0.02966 =
         0.02902   -0.00052   -0.00180    0.00404
AFIX  43
H16   2    0.423605    0.500108    0.347891    11.00000   -1.20000
AFIX   0
C20   1    0.667893    0.515545    0.452214    11.00000    0.02620    0.03976 =
         0.02366   -0.00408    0.00247   -0.00715
C21   1    0.582364    0.543086    0.456096    11.00000    0.02685    0.03306 =
         0.02987   -0.00002    0.00455   -0.00332
AFIX  43
H17   2    0.539366    0.531399    0.425964    11.00000   -1.20000
AFIX   0
C22   1    0.558764    0.587673    0.503643    11.00000    0.03928    0.03667 =
         0.03940   -0.00646    0.01604   -0.00796
AFIX  43
H18   2    0.500007    0.606675    0.505807    11.00000   -1.20000
AFIX   0
C23   1    0.620277    0.604149    0.547319    11.00000    0.05387    0.04225 =
         0.03393   -0.01356    0.01420   -0.01059
AFIX  43
H19   2    0.603963    0.634406    0.579973    11.00000   -1.20000
AFIX   0
C24   1    0.705715    0.577186    0.544297    11.00000    0.05235    0.07376 =
         0.03504   -0.02129   -0.00654   -0.00761
AFIX  43
H20   2    0.747988    0.588983    0.574867    11.00000   -1.20000
AFIX   0
C25   1    0.730413    0.533059    0.497077    11.00000    0.03207    0.07561 =
         0.04075   -0.01934   -0.00986    0.00137
AFIX  43
H21   2    0.789513    0.514712    0.495082    11.00000   -1.20000
AFIX   0
C26   1    0.767045    0.388392    0.420970    11.00000    0.02331    0.03691 =
         0.03863    0.00683   -0.00606   -0.00056
C27   1    0.745318    0.360594    0.477799    11.00000    0.05081    0.07272 =
         0.04545    0.02206   -0.00654    0.00740
AFIX  43
H22   2    0.701640    0.382974    0.502574    11.00000   -1.20000
AFIX   0
C28   1    0.788721    0.299536    0.497559    11.00000    0.07732    0.08901 =
         0.08277    0.05481   -0.02031    0.00004
AFIX  43
H23   2    0.775095    0.280642    0.536452    11.00000   -1.20000
AFIX   0
C29   1    0.851328    0.265976    0.461473    11.00000    0.05520    0.06881 =
         0.14383    0.05599   -0.01970    0.01330
AFIX  43
H24   2    0.879966    0.223912    0.475085    11.00000   -1.20000
AFIX   0
C30   1    0.871232    0.293621    0.406800    11.00000    0.04127    0.04938 =
         0.11544    0.01678    0.00327    0.01341
AFIX  43
H25   2    0.914500    0.270655    0.382086    11.00000   -1.20000
AFIX   0
C31   1    0.830380    0.354543    0.385665    11.00000    0.03611    0.04486 =
         0.06487    0.01021    0.00246    0.00508
AFIX  43
H26   2    0.845802    0.373102    0.346964    11.00000   -1.20000
AFIX   0
HKLF 4

REM  PddpppCF3NN
REM R1 =  0.0742 for    6811 Fo > 4sig(Fo)  and  0.0789 for all    7096 data
REM    397 parameters refined using      0 restraints

END

WGHT      0.0396     14.3317

REM Instructions for potential hydrogen bonds
EQIV $1 x+1/2, y, -z+1/2
HTAB C7 O2_$1
HTAB C9 F4_$1
EQIV $2 -x+1, y+1/2, -z+1/2
HTAB C13 F3_$2
HTAB C15 F5_$2
HTAB C31 F4_$1
HTAB C31 O2_$1

REM Highest difference peak  1.209,  deepest hole -0.580,  1-sigma level  0.114
Q1    1   0.9176  0.2733  0.3407  11.00000  0.05    1.21
Q2    1   0.7544  0.5915  0.6601  11.00000  0.05    0.88
Q3    1   0.5862  0.4132 -0.0184  11.00000  0.05    0.75
Q4    1   0.8020  0.2225  0.3912  11.00000  0.05    0.67
Q5    1   0.5190  0.4045  0.3015  11.00000  0.05    0.54
Q6    1   0.5845  0.5016  0.0504  11.00000  0.05    0.47
Q7    1   0.7588  0.4883  0.2301  11.00000  0.05    0.47
Q8    1   0.5796  0.6853  0.2730  11.00000  0.05    0.44
Q9    1   0.6385  0.4587  0.1141  11.00000  0.05    0.43
Q10   1   0.2378  0.2364  0.1786  11.00000  0.05    0.43
Q11   1   0.5794  0.3180  0.2700  11.00000  0.05    0.42
Q12   1   0.7411  0.2481  0.3694  11.00000  0.05    0.42
Q13   1   0.5128  0.4099  0.3657  11.00000  0.05    0.41
Q14   1   0.6573  0.4054  0.3692  11.00000  0.05    0.41
Q15   1   0.2798  0.5224  0.3468  11.00000  0.05    0.39
Q16   1   0.6564  0.4039  0.3012  11.00000  0.05    0.38
Q17   1   0.4733  0.5577  0.3192  11.00000  0.05    0.37
Q18   1   0.7031  0.2800  0.3533  11.00000  0.05    0.37
Q19   1   0.5006  0.6003  0.2890  11.00000  0.05    0.37
Q20   1   0.8020  0.2758  0.3747  11.00000  0.05    0.37
Q21   1   0.8020  0.2794  0.4271  11.00000  0.05    0.37
Q22   1   0.7470  0.4085  0.5185  11.00000  0.05    0.36
Q23   1   0.5884  0.3606  0.3792  11.00000  0.05    0.35
Q24   1   0.4824  0.4623  0.3954  11.00000  0.05    0.35
Q25   1   0.8551  0.3130  0.4677  11.00000  0.05    0.35
;

_shelx_res_checksum   34201

_shelx_hkl_file
;
   0   0   4  672.05   29.53
   0   0  -4  689.90   29.77
   0   0   4  813.90   36.29
   0   0  -4  807.57   36.59
   0   0   5    6.24    3.73
   0   0  -5    5.31    5.80
   0   0   5    2.94    5.77
   0   0  -5    1.75    3.03
   0   0   6  672.99   31.03
   0   0  -6  835.30   36.99
   0   0   6  943.99   45.42
   0   0  -6  912.69   43.06
   0   0  -7    4.31    2.76
   0   0   7    2.30    6.19
   0   0  -7    1.86    6.22
   0   0   8  990.75   45.80
   0   0  -8 1124.37   49.34
   0   0  -8 1225.27   57.66
   0   0   8 1320.68   60.04
   0   0   9    7.14    3.29
   0   0  -9   10.06    7.50
   0   0  -9    6.49    3.14
   0   0   9    1.86    5.52
   0   0  10 2199.66   94.19
   0   0 -10 2574.83  108.83
   0   0 -10 2585.67  113.53
   0   0  11    2.44    4.11
   0   0 -11    4.41    4.14
   0   0 -11   15.24   10.10
   0   0  13    3.44   13.50
   0   0 -13    6.36   12.36
   0   0  14 1025.51   51.61
   0   0 -14 1438.01   75.09
   0   0  15   22.74    8.96
   0   0 -15    4.33    8.71
   0   0  16 3105.82   52.99
   0   0 -16 3465.87  131.16
   0   0  18 2698.82   54.19
   0   0 -18 3233.29  135.31
   0   0  20  155.44   20.08
   0   0 -20  202.38   26.84
   0   0  21   11.34   12.86
   0   0 -21   22.95   14.74
   0   0 -22 1432.85   83.04
   0   0 -23    7.88   10.42
   0   0 -23   32.01   26.44
   0   0 -24  160.18   25.82
   0   0 -24  239.97   30.56
   0   0 -25    8.25   12.15
   0   0 -25   19.70   12.56
   0   0 -26 1033.82   82.77
   0   0 -26 1328.10   68.06
   0   0 -27   16.48   12.91
   0   0 -27    1.77    9.50
   0   0 -28  411.66   56.56
   0   1   4    6.66    6.04
   0  -1  -4    9.27    4.15
   0   1  -4   11.07    7.16
   0  -1   4    8.32    6.30
   0  -1  -4    9.69    5.95
   0   1   4    5.42    3.00
   0   1  -4    2.87    3.55
   0  -1   4    4.84    4.26
   0   1   5    6.72    4.27
   0  -1  -5    5.84    6.07
   0   1  -5    2.96    2.84
   0  -1   5   12.41    8.15
   0  -1  -5   10.51    8.01
   0   1   5    6.31   13.38
   0  -1   5    2.84    4.72
   0  -1  -6    7.39    5.63
   0   1   6    8.61    6.87
   0   1  -6    1.72    3.09
   0  -1   6    1.15    3.82
   0   1   6    8.77   11.00
   0   1  -6    8.79   10.88
   0  -1  -6    5.91    6.48
   0  -1   6    7.24    9.43
   0   1   7    9.52    6.28
   0  -1  -7   11.81    5.78
   0   1  -7    2.61    6.36
   0  -1  -7    5.76    9.11
   0  -1   7    9.71   12.91
   0   1   8    4.07    4.75
   0  -1   8    8.15    6.99
   0   1  -8    4.43    4.42
   0  -1  -8    5.66    4.10
   0  -1  -8   10.96    8.03
   0   1   8    2.13    7.82
   0   1  -8    6.83    7.22
   0  -1   8    6.87   14.94
   0  -1   9    6.68   10.03
   0   1   9    4.75    4.49
   0  -1  -9    7.77    5.45
   0   1  -9    6.54    6.27
   0  -1  -9    4.34    7.39
   0   1   9    5.16    7.58
   0  -1   9    9.25    6.72
   0   1  10    4.99    3.19
   0  -1  10   20.38    9.83
   0  -1 -10   10.43    7.54
   0   1 -10    9.64    5.37
   0  -1 -10    7.65    9.74
   0   1 -10   17.25   14.38
   0   1  11    4.14    3.10
   0  -1 -11    7.66    6.09
   0   1 -11   11.06   10.59
   0  -1 -11    2.42    6.62
   0  -1  12   19.06   14.59
   0   1  12    9.07    7.62
   0  -1 -12   10.16    6.33
   0   1 -12   19.50   16.92
   0  -1 -12   29.11   14.93
   0   1  13    9.83    7.59
   0  -1 -13    6.89   12.01
   0   1 -13    8.50    7.93
   0   1  14   19.66   10.09
   0  -1  14    4.68    5.62
   0  -1 -14   12.89   10.37
   0   1 -14   14.71   23.60
   0  -1  15   14.43    6.92
   0   1  15   11.12   13.13
   0  -1 -15   12.88    8.44
   0   1 -15   23.96   11.75
   0  -1  16   18.21   10.27
   0   1  16    7.88    4.75
   0  -1 -16    5.64   11.41
   0   1 -16   23.55   17.84
   0   1  17    9.85    4.69
   0  -1 -17   18.39   22.35
   0   1 -17   10.38   15.08
   0  -1  18   34.43   17.61
   0  -1 -18   18.60   13.00
   0   1 -18   21.71   22.01
   0  -1  19   17.13    8.18
   0  -1 -19    6.01    9.51
   0  -1 -19   18.24   12.48
   0   1 -19    8.91   22.19
   0  -1  20   17.22    9.20
   0  -1 -20    6.93   13.15
   0  -1 -20   13.03   15.12
   0   1 -20   21.63   15.27
   0  -1  21    8.23    6.82
   0  -1 -21   10.97   11.35
   0  -1 -21   29.15   15.52
   0   1 -21   24.53   14.69
   0  -1  22   14.82   11.80
   0  -1 -22   23.24   12.45
   0  -1 -22   16.84   16.98
   0   1 -22   25.89   18.62
   0  -1 -23   12.14   11.60
   0  -1 -23   31.19   26.34
   0   1 -23    8.88   15.54
   0  -1 -24   15.53   10.31
   0  -1 -24   25.10   21.25
   0   1 -24   13.49   13.25
   0  -1 -25   11.42    7.15
   0   1 -25   21.60   15.08
   0   1 -25   16.82   14.40
   0  -1 -25   39.80   18.85
   0  -1 -26   20.45   14.47
   0   1 -26   13.88   26.69
   0   1 -26   11.49   21.28
   0  -1 -26   19.43   14.58
   0  -1 -27   15.96   11.66
   0   1 -27   21.26   16.86
   0   1 -27    7.62    9.70
   0  -1 -27   26.55   17.44
   0   1 -28    9.02   14.19
   0   1 -28   29.71   22.40
   0  -1 -28   23.51   24.69
   0  -2   3 2095.89   85.20
   0   2   3 2047.84   82.23
   0   2   3 2150.93   87.49
   0  -2  -3 1974.06   80.86
   0  -2   3 2138.94   87.03
   0   2  -3 2256.19   91.56
   0  -2   4  158.36   11.04
   0   2  -4  208.85   20.24
   0  -2  -4  127.39   10.43
   0   2   4  131.48    7.37
   0  -2  -4  163.25   18.22
   0   2   4  173.28   18.66
   0   2  -4  155.73   10.88
   0  -2   4  152.29   18.53
   0  -2  -5 2106.56   85.38
   0  -2   5 2487.57  101.89
   0   2  -5 2664.01  108.40
   0  -2  -5 2576.10  105.99
   0   2   5 2879.73  117.62
   0  -2   5 3030.93  123.62
   0  -2  -6 1232.30   52.99
   0  -2   6 1273.33   55.83
   0   2  -6 1299.75   56.74
   0  -2  -6 1209.59   51.20
   0  -2  -6 1286.63   57.23
   0   2   6 1500.24   65.62
   0  -2   6 1478.54   65.24
   0   2  -6 1428.47   64.26
   0  -2  -7  724.59   33.28
   0  -2   7  771.92   36.72
   0   2  -7  883.86   41.88
   0  -2  -7  651.17   34.80
   0  -2  -7  823.49   41.77
   0   2   7  916.28   43.49
   0   2  -7  885.15   44.87
   0  -2   7  928.26   50.74
   0  -2  -8  271.90   18.08
   0  -2   8  290.00   26.83
   0   2  -8  335.38   36.85
   0  -2  -8  216.90   20.55
   0  -2  -8  331.19   25.26
   0   2  -8  245.05   35.21
   0   2   8  327.87   22.45
   0  -2   8  335.33   25.29
   0  -2  -9  893.32   46.47
   0  -2   9  912.11   49.37
   0   2  -9 1041.58   53.97
   0  -2  -9  722.10   52.27
   0  -2  -9  961.69   77.57
   0   2  -9  970.29   54.40
   0  -2 -10 1380.81   60.91
   0  -2  10 1259.14   59.17
   0   2 -10 1507.33   66.93
   0  -2 -10 1154.88   75.81
   0  -2 -10 1241.21   75.33
   0   2 -10 1514.62   70.39
   0  -2  11 1753.39   78.33
   0  -2 -11 1994.01   86.22
   0  -2 -11 1488.68  128.21
   0  -2 -11 1983.37   90.56
   0   2 -11 1991.30   90.58
   0  -2  12   43.51   11.25
   0  -2 -12   50.20   12.28
   0  -2 -12   35.95   20.22
   0  -2 -12   46.80   24.00
   0   2 -12   29.95   18.87
   0  -2  13 1233.77   61.56
   0  -2 -13 1186.10   57.05
   0  -2 -13 1364.34   69.28
   0   2 -13 1361.29   41.33
   0  -2  14   30.38   11.25
   0  -2 -14   49.21   30.50
   0  -2 -14   35.25   22.29
   0   2 -14   42.70   25.42
   0  -2  15   23.51   11.35
   0  -2 -15    5.22    4.47
   0  -2 -15   16.08   14.85
   0   2 -15    9.20    9.95
   0  -2  16   57.05   14.79
   0  -2 -16   56.78   14.26
   0  -2 -16   78.80   32.54
   0   2 -16   53.20   32.98
   0  -2  17 1504.93   68.36
   0  -2 -17 1214.21   80.55
   0  -2 -17 1668.78   79.02
   0   2 -17 1749.19   84.32
   0  -2  18  710.72   41.11
   0  -2 -18  696.60   47.67
   0  -2 -18  980.82  110.48
   0   2 -18  925.40   91.81
   0  -2  19  279.77   30.15
   0  -2 -19  300.89   32.40
   0  -2 -19  307.09   30.84
   0   2 -19  304.63   32.02
   0  -2  20  131.69   30.35
   0  -2 -20  131.56   41.52
   0  -2 -20  154.47   25.03
   0   2 -20  191.41   30.44
   0  -2  21  832.17   43.81
   0  -2 -21  880.08   44.44
   0  -2 -21 1058.20   59.55
   0   2 -21 1098.50   60.02
   0  -2  22   11.38    5.69
   0  -2 -22   13.80   10.57
   0  -2 -22    5.60   15.80
   0   2 -22   19.50   18.09
   0  -2  23  943.59   58.99
   0  -2 -23  876.74   52.97
   0  -2 -23  954.22   63.06
   0   2 -23  959.22   68.31
   0  -2  24   20.58    6.39
   0  -2 -24   11.03   14.69
   0   2 -24   17.89   14.86
   0  -2 -24   20.20   23.46
   0  -2  25   20.43   13.81
   0  -2 -25   13.41   13.15
   0   2 -25    9.17   10.11
   0  -2 -25    9.81   11.22
   0  -2  26  335.34   35.15
   0  -2 -26  462.01   44.57
   0   2 -26  445.05   47.58
   0  -2 -26  420.72   46.22
   0   2 -27  373.42   37.49
   0  -2 -27  372.86   60.31
   0   2 -27  541.63   47.14
   0   2 -28   68.67   22.49
   0  -2 -28  110.20   49.45
   0   2 -28  104.59   26.11
   0  -3   0    8.44    5.33
   0   3   0    8.37    5.83
   0   3  -1    9.36    5.94
   0  -3   1    2.48    4.43
   0  -3  -1    6.20    3.32
   0   3   1    4.54    1.65
   0  -3   1    2.78    3.48
   0   3  -1    5.36    5.69
   0   3   1    6.51    4.03
   0  -3  -1    4.84    4.30
   0  -3   2   13.29    7.62
   0   3  -2   11.60    7.47
   0  -3  -2    7.77    5.50
   0   3   2    2.44    2.41
   0   3   2    3.68    4.43
   0  -3  -2   10.49    6.88
   0   3  -2    9.03    7.19
   0   3  -3    9.48    9.17
   0  -3   3    3.89    3.55
   0   3   3    0.45    2.50
   0  -3  -3    4.19    8.26
   0   3   3    8.75    9.40
   0  -3  -3   11.06    6.57
   0   3  -3    7.38    5.43
   0  -3   3    2.44    4.47
   0   3  -4   22.33   12.62
   0  -3   4   12.18    7.61
   0  -3  -4    2.80    3.99
   0   3   4    5.56    3.73
   0  -3  -4    4.75    4.15
   0   3   4   12.47   10.74
   0  -3   4    6.18    4.53
   0   3  -4    7.97    5.60
   0   3  -5    6.60    2.99
   0  -3   5    7.23    2.83
   0  -3  -5    4.76    3.47
   0   3   5    4.14    4.13
   0   3   5    6.27    8.53
   0  -3  -5    1.08    3.23
   0   3  -5    3.49    6.32
   0  -3   6   16.47   10.64
   0   3  -6    5.33    6.16
   0  -3  -6    5.49    4.04
   0   3   6    1.48    5.07
   0  -3  -6    4.98    7.72
   0   3   6    7.04   11.04
   0   3  -6   19.94   10.98
   0  -3   6    5.72    8.03
   0  -3  -7    7.65    5.70
   0  -3   7   10.22    6.39
   0   3  -7    3.93    5.88
   0  -3  -7    1.45    3.91
   0   3   7    4.49    7.39
   0  -3  -7    9.26    5.66
   0   3  -7    5.69    4.75
   0  -3   7    5.43    7.18
   0  -3  -8    7.62    6.20
   0  -3   8    8.80    7.62
   0   3  -8    6.98    5.52
   0  -3  -8    6.04    4.69
   0  -3  -8    2.82    4.70
   0  -3   8    2.41    4.19
   0  -3  -9    4.97    8.11
   0  -3   9   14.76    8.69
   0   3  -9    2.08    6.59
   0  -3  -9    2.63    6.98
   0  -3  -9    8.21   12.13
   0   3  -9    5.30    4.83
   0  -3 -10    6.98    5.00
   0  -3 -10    6.66    6.36
   0  -3 -10   13.98   14.44
   0   3 -10   21.90   12.31
   0  -3 -11   12.89    6.07
   0  -3  11   11.69    7.08
   0  -3 -11   15.21    8.62
   0  -3 -11    6.45    6.33
   0   3 -11   11.48    9.26
   0  -3 -12    3.91    5.04
   0  -3  12    7.47    4.36
   0  -3 -12   50.07   28.10
   0  -3 -12    5.31    8.44
   0   3 -12    8.14    5.62
   0  -3  13   19.98    9.66
   0  -3 -13    6.30    6.36
   0  -3 -13   13.43   13.83
   0  -3  14   11.12    7.48
   0  -3 -14   15.21   12.42
   0  -3 -14   21.89   16.07
   0   3 -14    8.23    8.99
   0  -3  15   10.63    7.10
   0  -3 -15    5.72    4.09
   0  -3 -15    3.41   15.72
   0   3 -15    9.19   10.62
   0  -3  16   16.16   10.84
   0  -3 -16   12.59   11.07
   0  -3 -16   44.15   32.14
   0   3 -16    9.64   15.85
   0  -3  17   20.79   14.03
   0  -3 -17   13.23   13.40
   0  -3 -17   25.52   23.51
   0   3 -17    5.81    6.55
   0  -3  18   12.58   11.86
   0  -3 -18    6.54    6.66
   0   3 -18   20.89   26.30
   0  -3  19   12.12    7.58
   0  -3 -19   11.16    9.49
   0  -3 -19   27.73   17.13
   0   3 -19   21.64   17.96
   0  -3  20   32.19   12.87
   0  -3 -20    9.51    9.25
   0  -3 -20   19.98   14.87
   0   3 -20   22.59   18.70
   0  -3  21   30.01   13.84
   0  -3 -21    6.89    8.17
   0  -3 -21   22.93   18.54
   0   3 -21   16.58   22.62
   0  -3  22   18.24    9.96
   0  -3 -22    6.99    6.25
   0  -3 -22   30.49   19.79
   0   3 -22   18.19   14.85
   0  -3  23   22.64    8.38
   0  -3 -23   16.79   13.53
   0  -3 -23   13.82   18.18
   0   3 -23   27.82   32.57
   0  -3  24   12.10    7.04
   0  -3 -24    6.99   10.90
   0  -3 -24   19.30   17.33
   0  -3  25   36.29   14.38
   0  -3 -25    8.62    7.92
   0  -3 -25   38.84   27.36
   0   3 -25   27.45   22.89
   0  -3  26   20.49   10.93
   0  -3 -26   12.86   11.19
   0   3 -26   35.69   15.84
   0  -3  27   41.29   20.95
   0   3 -27    9.81   13.63
   0  -3 -27   11.90   10.90
   0  -3 -28   13.73   12.06
   0   3 -28   19.90   22.15
   0   4   0  852.03   37.28
   0  -4   0  830.08   36.16
   0  -4   0  653.63   30.62
   0   4   0  634.32   29.85
   0  -4   1  476.54   24.29
   0  -4  -1  503.19   24.39
   0   4  -1  505.68   24.76
   0   4   1  478.32   23.07
   0  -4   1  378.73   21.51
   0   4  -1  361.91   26.74
   0  -4  -1  299.75   22.95
   0   4   1  355.12   24.45
   0  -4   2  563.79   27.51
   0   4  -2  633.18   30.09
   0   4   2  571.42   26.79
   0  -4  -2  615.35   28.24
   0   4  -2  463.56   25.01
   0  -4  -2  395.71   26.31
   0   4   2  491.43   26.31
   0   4  -2  434.14   23.50
   0  -4   3 3464.04  140.34
   0   4  -3 3745.45  151.23
   0  -4  -3 2697.94  110.12
   0   4   3 3038.55  123.99
   0  -4   3 3256.00  132.00
   0   4  -4 2381.36   98.95
   0  -4   4 2071.42   86.67
   0  -4  -4 2099.14   86.31
   0   4   4 1897.81   78.02
   0  -4  -4 1857.73   78.53
   0   4   4 2024.35   85.27
   0  -4   4 2096.90   87.40
   0   4  -4 2035.95   85.61
   0   4  -5  156.02   15.84
   0  -4   5  153.70   20.06
   0  -4  -5   99.92    8.79
   0   4   5  104.10   10.08
   0  -4  -5  102.20   13.16
   0   4   5  121.05   12.16
   0  -4   5  125.31   12.18
   0   4  -5  130.14   14.81
   0   4  -6 1700.53   74.03
   0  -4   6 1542.77   68.23
   0  -4  -6 1312.11   56.23
   0   4   6 1326.77   56.47
   0  -4  -6 1417.18   63.62
   0   4   6 1641.50   71.44
   0   4  -6 1378.23   74.87
   0  -4   6 1592.77   70.92
   0  -4   7  172.58   26.84
   0   4  -7  181.12   18.91
   0  -4  -7  134.83   13.55
   0   4   7  143.66   11.45
   0   4   7  144.26   13.37
   0  -4  -7  133.81   24.88
   0   4  -7  139.03   16.15
   0  -4   7  140.58   12.89
   0  -4   8 1238.45   57.00
   0   4  -8 1450.09   65.22
   0  -4  -8 1180.54   52.97
   0  -4  -8 1330.58   62.23
   0   4  -8 1428.72   66.93
   0  -4  -9   46.84    7.98
   0  -4   9   67.33   18.50
   0  -4  -9   29.97   21.85
   0  -4  -9   66.28   17.33
   0   4  -9   69.58   38.37
   0  -4 -10   12.68    4.96
   0  -4  10   16.66    9.08
   0  -4 -10    4.74    4.61
   0   4 -10   10.50   10.00
   0  -4 -11  998.17   53.69
   0  -4  11 1001.26   56.13
   0  -4 -11 1020.85   55.03
   0  -4 -11 1001.50   58.34
   0   4 -11 1135.75   64.87
   0  -4 -12  947.71   51.56
   0  -4  12  976.38   56.06
   0  -4 -12  812.54   48.83
   0  -4 -12  872.44   61.18
   0   4 -12 1144.71   68.67
   0  -4  13  761.36   45.65
   0  -4 -13  660.50   41.49
   0  -4 -13  921.61   74.79
   0   4 -13  745.40   55.17
   0  -4  14   19.86    9.22
   0  -4 -14   11.66    8.22
   0   4 -14   19.35   13.26
   0  -4  15  257.99   25.70
   0  -4 -15  249.10   31.30
   0  -4 -15  327.61   28.39
   0   4 -15  329.21   30.32
   0  -4  16  161.82   19.31
   0  -4 -16  115.69   30.00
   0  -4 -16  151.47   21.58
   0   4 -16  199.72   32.78
   0  -4  17  533.25   34.80
   0  -4 -17  427.34   28.15
   0  -4 -17  556.63   41.79
   0   4 -17  454.76   42.51
   0  -4  18   63.73   14.38
   0  -4 -18   58.74   28.37
   0  -4 -18   50.08   25.70
   0   4 -18  123.56   29.36
   0  -4  19  183.43   24.86
   0  -4 -19  162.17   17.85
   0   4 -19  186.18   48.01
   0  -4  20   15.37    8.96
   0  -4 -20    6.53    7.88
   0  -4 -20   11.02   10.60
   0   4 -20    8.61   14.20
   0  -4  21  109.68   22.01
   0  -4 -21  171.77   22.31
   0  -4 -21  201.03   31.13
   0   4 -21  120.99   25.61
   0  -4  22  352.40   29.64
   0  -4 -22  303.83   38.10
   0  -4 -22  309.24   29.47
   0   4 -22  390.75   42.39
   0  -4  23  334.80   33.44
   0  -4 -23  359.28   41.01
   0  -4 -23  416.82   45.87
   0   4 -23  498.79   54.08
   0  -4  24  320.16   32.72
   0  -4 -24  331.64   29.62
   0  -4 -24  315.64   42.53
   0   4 -24  340.07   48.37
   0  -4  25   48.54   13.90
   0  -4 -25   18.29   11.64
   0  -4 -25   17.77   20.49
   0   4 -25   29.77   23.18
   0  -4  26   15.63   12.09
   0  -4 -26   18.16   16.13
   0   4 -26   33.85   18.02
   0  -4  27  224.13   28.01
   0  -4 -27  286.19   45.52
   0   4 -27  286.53   41.10
   0  -4  28   40.41   18.23
   0   4 -28   48.72   27.16
   0  -4 -28   48.63   30.24
   0   5   0   11.92    7.53
   0  -5   0    1.95    2.99
   0  -5   0    9.11    5.98
   0   5   0   14.40    8.59
   0  -5  -1    6.65    8.89
   0  -5   1   38.40   19.94
   0   5  -1   13.68    8.05
   0   5   1   12.70   11.15
   0   5  -1   11.27   11.88
   0  -5   1    6.11    6.18
   0   5   1    5.83    5.41
   0  -5  -1   12.77    9.00
   0  -5   2    2.56    6.74
   0   5  -2   18.46    8.33
   0   5   2   13.83    8.40
   0  -5  -2    5.58    5.25
   0  -5   2   16.69    8.66
   0   5  -2    8.46   10.77
   0  -5  -2    2.63    6.50
   0   5   2    5.41    7.91
   0   5  -3   10.78    6.59
   0  -5  -3   16.30   10.31
   0   5   3    2.27    6.24
   0   5  -3    9.61    9.58
   0  -5  -3   11.89    9.84
   0   5   3    5.60    5.51
   0   5  -3   14.74   10.08
   0  -5   4   23.57   10.30
   0   5  -4   16.41    8.15
   0  -5  -4    6.71    5.91
   0   5   4    5.15    5.03
   0  -5  -4    4.21    9.93
   0   5   4   13.27   11.77
   0   5  -4   10.03    5.44
   0  -5   4    7.36    7.06
   0  -5   5   11.04    7.94
   0   5  -5   17.40    9.49
   0   5   5    7.44    5.81
   0  -5  -5    8.94    5.66
   0  -5  -5   19.78   16.47
   0   5   5    9.64   11.64
   0   5  -5    5.03    3.85
   0   5  -6    7.71    5.29
   0  -5   6   19.33   10.69
   0  -5  -6    4.19    5.46
   0   5   6    3.71    5.52
   0  -5  -6   13.29    8.47
   0   5   6    8.87    7.55
   0  -5   6    8.14    7.23
   0   5  -6   14.02   11.98
   0  -5   7    8.69    8.22
   0  -5  -7   11.70   13.12
   0  -5  -7   14.62   14.01
   0   5   7    7.24    9.37
   0   5  -7    8.67    8.20
   0  -5   7    2.94    4.87
   0  -5   8   17.68    9.45
   0  -5  -8    9.86    8.99
   0   5   8   12.01    5.98
   0  -5  -8    4.61   13.72
   0   5  -8    3.59    9.04
   0  -5   9   12.57    9.60
   0  -5  -9    5.84    7.53
   0   5   9    2.78    5.89
   0  -5  -9    4.95    5.86
   0  -5 -10    6.22    3.40
   0  -5  10    9.30   13.41
   0  -5 -10    7.22    5.67
   0  -5 -10   22.01    9.81
   0   5 -10    4.23    3.81
   0  -5 -11    9.46    6.07
   0  -5  11   11.62   10.04
   0  -5 -11   12.75   10.52
   0  -5 -11    6.51   15.09
   0   5 -11   13.23   15.35
   0  -5 -12   14.20    8.90
   0  -5  12    8.02    5.16
   0  -5 -12   20.24   12.58
   0   5 -12   17.90   12.94
   0  -5 -13    3.45    7.22
   0  -5  13   17.28   12.17
   0  -5 -13   23.99   12.94
   0  -5 -13   51.41   26.72
   0   5 -13   20.60   15.77
   0  -5  14   20.06    9.02
   0  -5 -14   11.12    9.13
   0   5 -14    7.55    7.30
   0  -5  15   13.11   10.53
   0  -5 -15    3.28    5.10
   0  -5 -15   20.67    9.76
   0   5 -15   15.37   11.19
   0  -5  16   11.97    8.12
   0  -5 -16    9.14    6.35
   0  -5 -16   10.04    9.52
   0   5 -16   20.54   15.96
   0  -5  17   16.42    8.63
   0  -5 -17    3.99    6.80
   0  -5 -17    6.90   11.98
   0   5 -17   14.90    8.71
   0  -5  18    3.44    6.80
   0  -5 -18    4.11    7.52
   0  -5 -18   14.74    4.95
   0   5 -18    9.85   15.32
   0  -5  19   35.86   15.17
   0  -5 -19   10.24   13.38
   0  -5 -19   10.62    7.13
   0   5 -19   12.33   11.91
   0  -5  20   24.44   20.02
   0  -5 -20   14.46   17.79
   0  -5 -20   24.06   15.71
   0  -5  21   13.21    6.68
   0  -5 -21    6.59   10.44
   0  -5 -21   26.65   12.48
   0   5 -21   20.25   12.75
   0  -5  22   10.53    5.89
   0  -5 -22    1.92   13.27
   0  -5 -22   21.98   22.51
   0   5 -22    5.60   24.20
   0  -5  23   22.13    6.67
   0  -5 -23   11.53   16.70
   0  -5 -23   31.96   22.36
   0   5 -23   38.25   31.58
   0  -5  24   12.43    7.53
   0  -5 -24    8.23    6.33
   0  -5 -24   30.79   23.86
   0   5 -24    6.65   19.90
   0  -5  25    7.80    8.74
   0  -5 -25   13.23    8.21
   0  -5 -25   12.74   11.22
   0   5 -25   15.55   20.78
   0  -5 -26   11.83   25.96
   0   5 -26    5.06   13.36
   0  -5  27   22.98    7.59
   0  -5 -27   23.39   29.69
   0   5 -27   21.95   27.61
   0  -6   0  929.03   42.83
   0   6   0 1006.07   44.86
   0  -6   0  690.24   35.06
   0   6   0  783.10   38.13
   0  -6   1  570.59   30.61
   0   6  -1  730.03   35.87
   0  -6  -1  614.48   31.83
   0   6   1  654.68   31.82
   0  -6   1  435.76   25.84
   0  -6  -1  411.64   27.19
   0   6  -1  423.08   31.52
   0   6   1  493.03   27.43
   0  -6   2   18.24   11.97
   0   6  -2   17.35    8.82
   0  -6  -2   14.78   12.18
   0   6   2    5.97    9.26
   0  -6   2    3.69    5.57
   0   6  -2   15.09    8.37
   0  -6  -2   81.17   79.93
   0   6   2    8.89    5.85
   0  -6   3   21.33   13.68
   0   6  -3   29.37   11.41
   0   6   3   11.69    9.33
   0  -6  -3   20.63   13.27
   0   6  -3    8.93    7.18
   0  -6  -3   14.44   13.12
   0   6   3   15.01    7.76
   0   6  -3   10.33   14.79
   0  -6   4  174.63   18.14
   0   6  -4  182.85   15.74
   0  -6  -4  164.96   12.52
   0   6   4  179.13   11.36
   0   6  -4  169.40   16.53
   0  -6  -4  151.93   15.69
   0   6   4  161.90   20.12
   0   6  -4  132.52   43.19
   0  -6   5  932.01   45.06
   0   6  -5  946.78   44.88
   0  -6  -5  928.55   42.26
   0   6   5  902.72   40.94
   0  -6  -5  659.04   35.11
   0   6  -5  735.29   42.93
   0  -6   5  805.68   39.86
   0  -6   7 3109.34  132.41
   0  -6  -7 3460.52  143.81
   0   6   7 2872.65  119.43
   0  -6  -7 2803.08  120.48
   0   6  -7 3210.63  136.25
   0  -6   8  526.87   34.86
   0  -6  -8  514.21   30.58
   0   6   8  458.42   26.31
   0  -6  -8  509.42   36.08
   0   6  -8  484.46   50.35
   0  -6   9  169.10   28.15
   0  -6  -9  150.55   13.35
   0   6   9  135.14   13.21
   0  -6  -9  148.79   20.06
   0   6  -9  143.68   18.59
   0  -6  10 5595.08  233.86
   0  -6 -10 6152.80  252.06
   0   6  10 5699.21  233.93
   0  -6 -10 5467.72  229.82
   0   6 -10 6140.57  255.52
   0  -6 -11  284.65   21.87
   0  -6  11  315.08   31.22
   0  -6 -11  335.62   32.72
   0  -6 -11  242.22   19.77
   0   6 -11  329.42   30.03
   0  -6 -12 1738.66   78.56
   0  -6  12 1820.91   85.83
   0  -6 -12 1793.08   80.87
   0  -6 -12 1769.11   84.79
   0   6 -12 2130.39  100.30
   0  -6  13   26.99    7.89
   0  -6 -13   16.86   10.27
   0  -6 -13   13.31    7.48
   0   6 -13    9.77   11.54
   0  -6  14   11.76    8.75
   0  -6 -14   10.61    4.94
   0   6 -14   26.04   15.49
   0  -6  15  254.12   45.93
   0  -6 -15  262.72   20.17
   0  -6 -15  266.05   32.34
   0   6 -15  228.08   26.01
   0  -6  16  205.68   21.20
   0  -6 -16  209.94   20.76
   0  -6 -16  186.04   23.99
   0   6 -16  223.68   26.91
   0  -6  17   21.02    8.53
   0  -6 -17   14.37   10.16
   0  -6 -17   13.24    9.11
   0   6 -17    9.17   10.21
   0  -6  18  258.09   27.02
   0  -6 -18  336.17   25.84
   0  -6 -18  246.31   26.81
   0   6 -18  311.04   70.51
   0  -6  19   19.93   11.43
   0  -6 -19   26.90   14.44
   0  -6 -19   18.04   13.33
   0   6 -19   21.06   12.07
   0  -6  20  147.50   22.23
   0  -6 -20  164.54   41.62
   0  -6 -20  190.19   30.01
   0   6 -20  225.69   28.76
   0  -6  21   42.88   18.29
   0  -6 -21    7.51   15.72
   0  -6 -21   24.10   25.28
   0   6 -21   64.35   31.14
   0  -6  22 2171.32   62.32
   0  -6 -22 2261.04   57.76
   0  -6 -22 2298.75  123.80
   0  -6  23   40.15   14.58
   0  -6 -23   61.55   25.41
   0  -6 -23   54.24   32.41
   0   6 -23   22.50   19.79
   0  -6  24  865.92   66.47
   0  -6 -24  818.64   61.36
   0  -6 -24 1033.85   77.86
   0   6 -24  924.68   72.74
   0  -6  25  200.71   31.02
   0  -6 -25  229.70   44.13
   0   6 -25  204.79   44.09
   0  -6  26   56.09   18.91
   0  -6 -26   24.68   30.63
   0   6 -26   29.70   29.50
   0  -6  27   16.94    8.03
   0  -6 -27   25.29   22.77
   0   6 -27   16.92   26.73
   0  -7   0    8.21    8.08
   0   7   0   11.67    6.41
   0   7   0    6.33    7.91
   0  -7  -1    5.43    8.63
   0   7  -1    9.07    7.01
   0  -7   1    4.84    7.75
   0   7   1    2.51    5.78
   0   7   1    9.64   12.75
   0   7  -1    6.69    7.15
   0  -7  -1    6.56   11.16
   0  -7  -2    4.82    4.79
   0  -7   2   33.40   14.29
   0   7   2    2.70    5.58
   0  -7   2   11.74    7.52
   0  -7  -2   22.09   16.52
   0   7   2   13.73   11.59
   0  -7   3   10.11    8.63
   0   7  -3   12.10    7.95
   0  -7  -3    7.19    6.45
   0   7  -3    5.20    9.11
   0  -7  -3    7.38    9.26
   0   7  -3    4.62    7.30
   0  -7   4    4.11    7.95
   0   7  -4   13.21    8.01
   0  -7  -4    1.88    4.61
   0   7   4    4.61    5.64
   0   7  -4   14.03   11.28
   0  -7  -4   10.46    5.75
   0   7  -4   19.53   13.33
   0  -7   5    3.06    6.42
   0  -7  -5    6.86    4.93
   0   7   5    3.42    3.97
   0  -7  -5    4.59    4.87
   0   7  -5    5.30   19.27
   0  -7   6   24.69   14.22
   0  -7  -6   13.50    9.08
   0   7   6    1.63    4.14
   0  -7  -6    3.88    5.57
   0   7  -6    7.12    9.56
   0  -7   7    9.35    9.00
   0  -7  -7   15.11   14.31
   0   7   7    2.98    4.13
   0  -7  -7   12.90   12.95
   0  -7   8   14.90   10.98
   0  -7  -8   10.60    8.38
   0   7   8    4.51    4.86
   0  -7  -8    3.08   10.55
   0   7  -8    7.54    6.54
   0  -7   9   12.57    9.33
   0  -7  -9    6.45    6.22
   0   7   9   13.54   11.67
   0  -7  -9    8.91    8.29
   0   7  -9    8.39   11.73
   0  -7 -10    1.21    3.79
   0   7  10    0.63    6.32
   0  -7 -10   13.27    8.76
   0   7 -10   14.29   15.11
   0  -7  11   18.13   10.46
   0  -7 -11   14.39   12.08
   0   7  11    3.02    9.27
   0  -7  12   28.02   14.50
   0  -7 -12   29.54   22.42
   0  -7 -12   22.45   13.88
   0   7 -12   21.34   16.32
   0  -7  13    4.25    5.81
   0  -7 -13    6.51    8.46
   0  -7 -13   30.82   13.21
   0  -7  14   16.22    7.55
   0  -7 -14   10.22    5.82
   0  -7 -14   13.35   10.55
   0   7 -14   13.35   16.55
   0  -7  15    9.13    8.01
   0  -7 -15    1.31    2.89
   0  -7 -15   12.71   12.13
   0   7 -15   12.11   16.07
   0  -7  16   24.18    9.48
   0  -7 -16    7.93   11.51
   0  -7 -16   27.95   18.66
   0   7 -16   26.87   21.04
   0  -7  17    7.24    7.18
   0  -7 -17    8.15    9.38
   0  -7 -17   10.43   14.36
   0  -7  18   16.74    7.48
   0  -7 -18   12.39   11.15
   0  -7 -18    6.60   10.34
   0  -7  19   42.66   17.13
   0  -7 -19   28.50   16.76
   0  -7 -19   10.39    9.05
   0   7 -19   19.47   19.06
   0  -7  20   26.86   15.25
   0  -7 -20    8.48   12.32
   0  -7 -20   14.62   13.81
   0   7 -20    4.83    8.03
   0  -7  21   36.73   21.34
   0  -7 -21    2.88    5.66
   0  -7 -21   23.75   18.97
   0   7 -21    6.36   24.56
   0  -7  22   19.08    9.75
   0  -7 -22   18.65   19.50
   0   7 -22   25.87   25.70
   0  -7  23   51.28   19.85
   0  -7 -23    6.63   11.46
   0  -7 -23   20.68   18.80
   0   7 -23   26.26   21.80
   0  -7  24   34.22   11.09
   0  -7 -24   19.73   11.39
   0   7 -24   27.27   21.17
   0  -7  25   12.27    8.37
   0  -7 -25   27.95   17.00
   0   7 -25    7.66   21.27
   0  -7 -26   19.10   18.64
   0   7 -26   20.16   27.48
   0  -7  27   32.26   13.30
   0  -7 -27   26.52   14.93
   0   7 -27   17.84   31.30
   0  -8   0  357.12   26.36
   0   8   0  375.23   25.41
   0  -8   0  223.16   27.57
   0   8   0  268.74   21.70
   0   8  -1 6592.10   59.13
   0  -8   1 5891.53  242.22
   0   8   1 6546.65   57.04
   0  -8  -1 4378.93  182.30
   0  -8   1 4656.77  192.92
   0  -8  -2   36.96   10.05
   0  -8   2   43.86   12.18
   0   8  -2   38.54   10.19
   0   8   2   20.30   15.65
   0  -8   2   34.24   13.39
   0  -8  -2   33.15   12.46
   0  -8   3 1139.00   61.34
   0  -8  -3 1273.94   64.82
   0   8   3 1384.81   62.03
   0  -8  -3  884.52   54.63
   0   8  -3 1032.10   31.58
   0  -8   4  922.34   53.13
   0  -8  -4  978.00   51.82
   0  -8  -4  780.35   44.72
   0   8  -4  726.31   41.61
   0  -8   5 3596.41  152.28
   0  -8  -5 3993.94  165.41
   0   8   5 3933.49  162.84
   0  -8  -5 3006.28  129.06
   0   8  -5 3503.04  149.10
   0  -8   6  138.83   33.45
   0  -8  -6   99.35   10.90
   0   8   6   96.67   11.79
   0  -8  -6   86.93   18.41
   0   8  -6   41.63   30.96
   0  -8   7 4416.29  186.21
   0  -8  -7 4953.31  205.19
   0   8   7 4586.25  189.75
   0  -8  -7 3814.43  162.17
   0   8  -7 4517.83  190.16
   0  -8   8  431.12   32.31
   0  -8  -8  492.03   31.79
   0   8   8  366.58   25.64
   0  -8  -8  323.00   24.51
   0   8  -8  504.72   38.14
   0  -8   9  967.33   51.03
   0  -8  -9  953.05   46.91
   0   8   9  859.96   42.61
   0  -8  -9  771.37   43.75
   0   8  -9  783.93  144.43
   0  -8  10  624.42   39.21
   0  -8 -10  666.79   36.58
   0   8  10  490.11   27.84
   0  -8 -10  522.00   37.02
   0   8 -10  522.16   43.62
   0  -8  11 9480.86  399.99
   0  -8 -11 9131.79   95.11
   0  -8  12   96.00   19.72
   0  -8 -12   95.97   18.31
   0  -8 -12   75.94   15.88
   0   8 -12   76.31   23.18
   0  -8  13  487.00   39.33
   0  -8 -13  630.85   42.79
   0  -8 -13  595.62   46.41
   0   8 -13  483.05   44.48
   0  -8  14   46.21   19.49
   0  -8 -14   52.36    9.62
   0  -8 -14   53.61   16.73
   0   8 -14   46.73   23.06
   0  -8  15  874.47   55.51
   0  -8 -15  908.91   44.29
   0  -8 -15  739.48   45.58
   0   8 -15 1036.12   60.32
   0  -8  16   11.86    6.65
   0   8 -16   20.78   18.45
   0  -8  17 2442.86  102.34
   0  -8 -17 2678.45  102.56
   0  -8 -17 2296.89   98.04
   0   8 -17 2512.68  110.50
   0  -8  18   25.79   18.97
   0  -8 -18    9.05   11.03
   0  -8 -18   15.97   19.82
   0  -8  19   62.87   23.97
   0  -8 -19   69.39   36.73
   0  -8 -19   44.03   25.70
   0   8 -19   43.87   25.17
   0  -8  20  159.60   28.53
   0  -8 -20  152.16   22.29
   0  -8 -20  169.57   34.71
   0   8 -20  242.26   38.94
   0  -8  21  335.80   38.75
   0  -8 -21  382.91   33.45
   0  -8 -21  363.79   40.56
   0   8 -21  395.14   51.47
   0  -8  22  262.96   31.71
   0  -8 -22  251.45   25.54
   0  -8 -22  293.78   38.64
   0   8 -22  265.30   34.38
   0  -8  23  926.98   69.53
   0  -8 -23 1018.04   77.93
   0   8 -23 1059.87   80.78
   0  -8  24  122.65   20.56
   0  -8 -24  104.77   30.06
   0   8 -24  131.53   33.61
   0  -8  25  266.43   27.27
   0  -8 -25  282.07   35.31
   0   8 -25  333.09   46.03
   0  -8  26   45.88   19.63
   0  -8 -26   28.60   32.94
   0   8 -26   53.69   25.13
   0   8 -27  501.91   64.27
   0  -9   0    5.66   12.30
   0  -9   0   11.46    4.92
   0   9   1    7.06    6.35
   0  -9   1   10.16    5.37
   0  -9  -1    7.05    8.18
   0  -9  -2   11.80    8.64
   0   9   2    2.35    4.20
   0  -9   2   12.66    9.33
   0  -9  -2    8.66    8.38
   0  -9   3   13.24   12.88
   0  -9  -3    7.54    5.43
   0   9   3    7.16    4.99
   0  -9  -3    7.26    6.66
   0  -9   4    9.35    6.99
   0  -9  -4    5.07    5.90
   0   9   4    3.37    3.51
   0   9  -4    4.05    8.43
   0  -9   5    5.17    5.60
   0  -9  -5    7.52    3.63
   0   9   5   15.81   12.15
   0  -9  -5    9.28   10.87
   0   9  -5    2.74    6.30
   0  -9   6   10.45    5.35
   0  -9  -6    5.19    6.74
   0   9   6    2.51    3.19
   0  -9  -6    3.38    3.64
   0   9  -6    4.77    8.44
   0  -9  -7    7.14    6.06
   0   9   7    3.88    8.21
   0  -9  -7   13.72    7.51
   0   9  -7    8.50    9.07
   0  -9   8   17.92   12.75
   0  -9  -8   30.23   30.45
   0   9   8    5.18    6.90
   0  -9  -8    2.97    5.76
   0   9  -8   10.00   13.18
   0  -9   9   18.22   20.56
   0  -9  -9    8.34   13.18
   0   9   9    5.97    7.89
   0  -9  -9   13.32    9.23
   0   9  -9    7.07    8.37
   0  -9  10   32.40   21.87
   0  -9 -10    7.87   10.62
   0  -9 -10   24.79   18.66
   0   9 -10   29.62   15.34
   0  -9  11   13.71   20.33
   0  -9 -11   75.09   29.34
   0  -9 -11   38.00   24.01
   0   9 -11   12.00   16.34
   0  -9  12    9.06    6.33
   0  -9 -12   27.83   14.83
   0  -9 -12   16.54   13.35
   0   9 -12    2.68    9.05
   0  -9  13   11.93    6.89
   0  -9 -13    8.91    7.73
   0  -9  14   16.38   14.70
   0  -9 -14    2.27    6.65
   0  -9 -14   15.28    9.75
   0   9 -14   27.65   17.83
   0  -9  15   19.17    9.77
   0  -9 -15    8.00   10.11
   0  -9 -15   18.36   18.73
   0   9 -15   24.59   17.19
   0  -9  16   38.18   22.49
   0  -9 -16   10.55   12.34
   0  -9 -16   21.08    9.70
   0   9 -16    4.79   15.41
   0  -9  17   48.22   30.70
   0  -9 -17    3.35   12.41
   0  -9 -17   27.69   17.90
   0   9 -17  103.09   28.92
   0  -9  18   29.24    9.58
   0  -9 -18   13.82   19.03
   0   9 -18   23.66   17.64
   0  -9  19   27.11   13.65
   0  -9 -19    5.45   11.59
   0   9 -19    3.32   16.63
   0  -9  20   12.65    7.35
   0  -9 -20   12.48    9.10
   0  -9 -20   13.97   10.95
   0   9 -20   24.98   19.38
   0  -9  21   28.83   23.74
   0  -9 -21    5.52   10.03
   0  -9 -21   28.02   19.68
   0   9 -21    5.31   19.86
   0  -9  22   35.09   11.25
   0  -9 -22   11.03   12.97
   0  -9 -22   16.03   18.12
   0   9 -22   17.93   11.89
   0  -9  23   56.57   22.77
   0  -9 -23    9.10    5.98
   0   9 -23   35.32   28.89
   0  -9  24   35.19   15.78
   0  -9 -24    4.29    7.50
   0   9 -24   12.77   21.60
   0  -9  25   57.20   17.95
   0  -9 -25   10.74    8.27
   0   9 -25    2.62   30.79
   0  -9  26   50.32   22.73
   0  -9 -26   25.00    9.87
   0   9 -26   19.82   16.70
   0 -10   0 4082.42  172.45
   0 -10   0 3188.80  137.49
   0 -10  -1   69.07   12.70
   0 -10   1   39.80   14.06
   0 -10   1   56.24   15.80
   0 -10  -1   63.36   15.11
   0 -10   2  102.60   15.51
   0 -10  -2  105.42   12.01
   0 -10   2   77.60   18.16
   0 -10  -2   40.53   37.35
   0 -10   3  509.61   35.09
   0 -10  -3  535.63   33.81
   0 -10   3  362.73   29.75
   0 -10  -3  402.95   30.49
   0 -10   4  829.46   51.27
   0 -10  -4  854.79   49.58
   0 -10  -4  674.30   44.33
   0  10  -4  753.05   46.97
   0 -10   5   71.86   13.54
   0 -10  -5   84.25   13.03
   0 -10  -5   26.37   19.70
   0  10  -5   91.52   18.25
   0 -10   6 3916.03  170.76
   0 -10  -6 4453.41  189.95
   0 -10  -6 3193.88  141.55
   0  10  -6 3610.88  161.84
   0 -10   7  757.01   46.93
   0 -10  -7  748.89   39.72
   0 -10  -7  527.37   35.27
   0  10  -7  533.37   70.35
   0 -10   8  343.93   29.30
   0 -10  -8  381.37   25.05
   0 -10  -8  273.19   24.70
   0  10  -8  364.99   31.70
   0 -10   9 2112.96   66.22
   0 -10  -9 2257.46   64.75
   0 -10  -9 1860.34   74.35
   0 -10  10 2849.27   83.49
   0 -10 -10 3228.22   84.61
   0 -10 -10 2442.09   75.31
   0  10 -10 2999.98   87.75
   0 -10  11 3063.90  119.07
   0 -10 -11 3404.91  123.89
   0 -10 -11 2820.25  109.82
   0  10 -11 3337.87  128.51
   0 -10  12 2561.34  105.63
   0 -10 -12 2969.77  109.21
   0 -10 -12 2099.71   88.39
   0  10 -12 2738.89  109.45
   0 -10  13  187.32   31.05
   0 -10 -13  232.90   18.80
   0 -10 -13  162.94   21.67
   0  10 -13  207.71   42.62
   0 -10  14  981.33   52.85
   0 -10 -14 1230.57   51.70
   0 -10 -14  924.05   50.41
   0  10 -14 1188.69   62.68
   0 -10  15  113.96   24.55
   0 -10 -15  107.75   17.26
   0 -10 -15   81.37   24.76
   0  10 -15   94.85   55.36
   0 -10  16 2561.45  108.43
   0 -10 -16 2973.35  112.49
   0 -10 -16 2275.96  100.12
   0  10 -16 2893.01  120.07
   0 -10  17  139.26   33.78
   0 -10 -17  145.46   22.22
   0 -10 -17  125.10   50.04
   0  10 -17  194.49   29.14
   0 -10  18  576.51   39.28
   0 -10 -18  550.85   47.81
   0  10 -18  681.92   48.88
   0 -10  19   45.29   13.55
   0 -10 -19   25.24   14.86
   0 -10 -19   30.22   12.56
   0  10 -19   43.71   11.84
   0 -10  20   21.20   15.52
   0 -10 -20    7.99    9.21
   0 -10 -20   18.01    9.86
   0 -10  21  195.05   31.44
   0 -10 -21  206.64   25.55
   0 -10 -21  198.18   30.49
   0  10 -21  194.91   29.18
   0 -10  22   59.76   28.44
   0 -10 -22   24.91   22.90
   0  10 -22   11.69   16.86
   0 -10  23   65.37   35.21
   0 -10 -23   36.38   14.19
   0  10 -23   54.75   28.95
   0 -10  24   55.11   16.92
   0 -10 -24   83.26   32.49
   0  10 -24  122.52   34.30
   0 -10  25   10.60    7.85
   0 -10 -25    8.47   18.28
   0  10 -25   43.33   24.03
   0 -10  26  211.62   50.87
   0 -10 -26  254.78   46.76
   0  10 -26  320.54   45.33
   0 -11   0   20.58   13.32
   0 -11   1   17.79   10.11
   0 -11  -1    0.01    7.15
   0 -11   1    9.49    9.32
   0 -11  -1   20.88   12.01
   0 -11   2   10.29    8.06
   0 -11  -2   22.18   11.20
   0 -11   2   11.23    8.10
   0 -11   3   16.41    9.32
   0 -11  -3    9.68    4.47
   0 -11  -3   11.69   13.85
   0 -11   4   40.03   14.88
   0 -11  -4   23.94    8.83
   0  11  -4   20.40   13.74
   0 -11   5   11.47    6.68
   0 -11  -5   13.27   10.59
   0 -11  -5   10.29   10.66
   0  11  -5   14.33   13.62
   0 -11   6   11.36   10.53
   0 -11  -6   10.07    9.76
   0 -11  -6    9.37    4.20
   0  11  -6   22.06   18.38
   0 -11   7   16.34    7.94
   0 -11  -7   12.20   16.65
   0 -11  -7    3.69   11.02
   0  11  -7   27.05   12.07
   0 -11   8   11.73    8.94
   0 -11  -8    5.19    3.88
   0 -11  -8   11.98   17.46
   0  11  -8   21.29   20.55
   0 -11   9    6.27    8.41
   0 -11  -9    6.99    6.34
   0 -11  -9   14.60   12.88
   0  11  -9   34.56   46.53
   0 -11  10    5.82    9.85
   0 -11 -10   21.22   13.22
   0 -11 -10    9.93    7.18
   0  11 -10   10.15   18.23
   0 -11  11    8.73    7.87
   0 -11 -11    8.33   11.08
   0  11 -11    9.59   15.87
   0 -11  12   15.54   16.63
   0 -11 -12   13.47   10.19
   0 -11 -12   27.89   17.19
   0  11 -12   14.63   12.85
   0 -11  13   22.75   15.88
   0 -11 -13    9.25   15.67
   0 -11 -13   25.99   20.47
   0  11 -13   13.37   16.10
   0 -11  14   13.14   17.68
   0 -11 -14    9.29   10.44
   0 -11 -14    3.16    8.82
   0  11 -14   23.53   17.88
   0 -11  15   29.08   10.83
   0 -11 -15   12.17   13.77
   0 -11 -15   26.25   15.86
   0  11 -15   13.47   20.02
   0 -11  16    7.97    9.02
   0 -11 -16   12.22   12.04
   0 -11 -16   27.02   23.71
   0  11 -16   26.37   14.90
   0 -11  17   16.57   15.42
   0 -11 -17    7.66   10.81
   0 -11 -17   17.86   10.80
   0  11 -17   14.78   14.41
   0 -11  18   15.46   11.57
   0 -11 -18    7.03    7.61
   0 -11 -18    1.42    8.55
   0  11 -18   31.38   26.17
   0 -11  19   21.75   14.84
   0 -11 -19    7.70   11.54
   0 -11 -19   16.98   12.46
   0  11 -19   14.76   13.59
   0 -11  20   32.25   17.71
   0 -11 -20   14.46   12.99
   0 -11 -20    3.49   10.64
   0  11 -20   19.20   14.00
   0 -11 -21   11.47   11.63
   0  11 -21   38.54   25.56
   0 -11 -22   14.65    9.87
   0  11 -22   37.40   31.20
   0 -11  23   17.08   10.84
   0 -11 -23   22.51   12.54
   0  11 -23   20.58   13.00
   0 -11  24   23.37   15.31
   0 -11 -24   28.61   25.52
   0  11 -24   21.22   15.94
   0 -11  25   32.22   15.23
   0 -11 -25   27.35   30.25
   0  11 -25   25.02   25.40
   0 -12   0 4575.53  198.23
   0 -12   0 3663.86  161.45
   0 -12  -1  839.55   46.11
   0 -12   1  826.14   46.74
   0 -12  -1  700.90   42.83
   0 -12   1  700.96   43.04
   0 -12   2 2740.23  124.08
   0 -12  -2 2848.39  126.41
   0 -12   2 2180.94  101.00
   0 -12  -2 2114.68   99.26
   0 -12   3   62.53   27.26
   0 -12  -3  100.13   15.88
   0 -12   3   54.48   25.41
   0 -12  -3   77.22   24.03
   0 -12   4   22.69   18.82
   0 -12  -4    7.81    6.33
   0 -12  -4    6.33   10.41
   0  12  -4   23.23    9.65
   0 -12   5   72.54   17.45
   0 -12  -5   71.62   15.39
   0 -12  -5   32.98   21.40
   0  12  -5   29.76   19.26
   0 -12   6  184.46   31.16
   0 -12  -6  177.15   17.27
   0 -12  -6  106.86   18.40
   0  12  -6  129.99   17.95
   0 -12   7  172.32   26.78
   0 -12  -7  180.67   19.45
   0 -12  -7  115.41   17.49
   0  12  -7  124.83   22.80
   0 -12   8   40.76   17.51
   0 -12  -8   43.05    9.29
   0 -12  -8   50.06   13.35
   0  12  -8   68.38   17.81
   0 -12   9   28.67   16.93
   0 -12  -9   17.44   13.62
   0 -12  -9    8.32   11.78
   0  12  -9   13.13   12.97
   0 -12  10 2062.50   91.39
   0 -12 -10 2437.50   99.53
   0 -12 -10 1801.28   81.90
   0  12 -10 2098.20   94.44
   0 -12  11  377.63   32.08
   0 -12 -11  461.25   31.73
   0 -12 -11  296.49   28.75
   0  12 -11  380.60   34.96
   0 -12  12 2476.69   98.57
   0 -12 -12 2858.22  102.61
   0 -12 -12 2001.98   85.20
   0  12 -12 2666.42  104.32
   0 -12  13  649.33   49.07
   0 -12 -13  604.83   39.05
   0 -12 -13  503.30   40.65
   0  12 -13  573.40   50.27
   0 -12  14   64.08   17.60
   0 -12 -14   87.31   27.51
   0 -12 -14   55.57   14.11
   0  12 -14   65.62   26.75
   0 -12  15   69.58   18.50
   0 -12 -15   66.18   23.16
   0 -12 -15   67.53   28.70
   0  12 -15   60.96   55.39
   0 -12  16  891.46   53.75
   0 -12 -16  985.14   48.94
   0 -12 -16  719.00   49.66
   0  12 -16 1037.81   61.23
   0 -12  17  194.11   30.73
   0 -12 -17  230.91   25.77
   0 -12 -17  170.11   33.63
   0  12 -17  228.01   46.60
   0 -12  18   90.65   28.11
   0 -12 -18  101.34   16.01
   0 -12 -18   91.55   20.96
   0  12 -18   66.81   34.94
   0 -12  19   47.00   22.54
   0 -12 -19   58.48   13.48
   0 -12 -19   40.16   26.55
   0  12 -19   58.38   22.39
   0 -12  20   47.31   19.76
   0 -12 -20   84.93   18.33
   0  12 -20  105.89   29.47
   0 -12  21   20.64   15.59
   0 -12 -21    7.74   10.20
   0  12 -21   16.14   11.68
   0 -12  22   13.88   10.41
   0 -12 -22   12.68   23.95
   0  12 -22   35.35   25.09
   0 -12  23   87.50   24.15
   0 -12 -23   75.78   23.28
   0  12 -23   33.73   40.86
   0 -12  24   38.64   14.38
   0 -13   0   17.77   17.48
   0 -13   0   17.95   15.90
   0 -13   1    8.89    4.02
   0 -13  -1   13.26    7.24
   0 -13   1    6.73   13.43
   0 -13   2    5.75    6.45
   0 -13  -2   18.07    8.51
   0 -13   2   20.07   20.24
   0 -13  -2    7.35   12.17
   0 -13   3   27.54   11.05
   0 -13  -3    5.84    5.98
   0 -13  -3    3.83   10.03
   0 -13   3   14.87   13.11
   0 -13   4   13.47   11.89
   0 -13  -4   14.81    7.45
   0 -13  -4   11.61   11.81
   0  13  -4   19.12   12.70
   0 -13  -5   17.19   12.29
   0 -13  -5   14.67   12.27
   0  13  -5    2.73   13.76
   0 -13   6   11.12   12.93
   0 -13  -6   31.45   11.00
   0 -13  -6   13.94   10.40
   0  13  -6    8.86    7.80
   0 -13  -7   10.43   10.46
   0 -13  -7   10.53    8.52
   0  13  -7   12.35   12.49
   0 -13   8   22.44   22.42
   0 -13  -8    9.58    7.13
   0  13  -8   16.90   14.52
   0 -13  -9   13.73   13.21
   0 -13  -9    8.76    6.16
   0  13  -9    7.30    9.31
   0 -13 -10   18.51    8.32
   0  13 -10   25.11   15.91
   0 -13 -11   13.82    8.03
   0 -13 -11   28.68   13.14
   0  13 -11   20.96   19.74
   0 -13  12    5.87    6.92
   0 -13 -12   24.61   18.43
   0  13 -12    9.43   11.88
   0 -13  13   15.01    8.03
   0 -13 -13   25.31   16.43
   0 -13 -13    2.42    7.32
   0  13 -13   15.09    8.44
   0 -13  14   36.32   19.70
   0 -13 -14   16.48   14.18
   0 -13 -14   10.82   12.86
   0  13 -14    6.16   19.60
   0 -13  15   18.50   10.60
   0 -13 -15   10.13   14.44
   0 -13 -15   25.33   12.97
   0  13 -15    4.98   12.51
   0 -13 -16   17.73   15.58
   0 -13 -16   19.56   10.86
   0  13 -16   17.58   28.99
   0 -13  17   68.70   31.77
   0 -13 -17   12.04   11.95
   0 -13 -17   16.59   10.82
   0  13 -17    8.09   16.20
   0 -13  18   33.76   22.63
   0 -13 -18   11.94    9.99
   0 -13 -18   22.54   14.93
   0  13 -18   11.73   13.62
   0 -13  19   14.38   10.93
   0 -13 -19   13.20   12.20
   0 -13 -19   21.73   18.78
   0  13 -19    7.54   12.04
   0 -13 -20   20.32   14.52
   0  13 -20   15.75    9.85
   0 -13  21    8.34    9.44
   0 -13 -21    6.16    9.99
   0  13 -21   22.51   16.71
   0 -13  22   33.19   14.56
   0 -13 -22   16.18    8.84
   0  13 -22   19.06   15.01
   0 -13  23   10.49   12.34
   0 -13 -23   10.69    5.57
   0  13 -23   35.70   26.58
   0 -13  24   29.15   11.54
   0  13 -24   18.69   21.95
   0 -14   0   12.53   10.31
   0 -14   0   11.81    8.29
   0 -14   1 2308.58   93.76
   0 -14  -1 2351.97   95.48
   0 -14   1 1740.25   74.34
   0 -14  -1 1817.52   78.49
   0 -14   2  126.52   24.09
   0 -14  -2  119.61   25.97
   0 -14  -2   52.23   15.38
   0 -14   2   61.21   18.04
   0 -14   3  291.41   39.14
   0 -14  -3  309.66   32.60
   0 -14  -3  230.17   23.54
   0 -14   4  539.31   46.21
   0 -14  -4  530.96   65.23
   0 -14  -4  382.92   37.51
   0  14  -4  309.40   30.07
   0 -14   5  594.40   41.48
   0 -14  -5  593.71   36.40
   0 -14  -5  444.29   36.03
   0  14  -5  444.36   46.57
   0 -14   6   27.71    8.83
   0 -14  -6   27.99   16.72
   0 -14  -6   15.43    7.33
   0  14  -6   13.75   22.96
   0 -14   7  922.90   51.77
   0 -14  -7 1008.72   53.11
   0 -14  -7  769.69   47.46
   0  14  -7  805.30   47.26
   0 -14   8   32.17   11.79
   0 -14  -8   20.07   11.42
   0 -14  -8    9.55    8.18
   0  14  -8   21.96   22.48
   0 -14   9  327.30   34.53
   0 -14  -9  375.25   31.29
   0 -14  -9  276.49   32.40
   0  14  -9  299.62   33.88
   0 -14  10   52.52   13.79
   0 -14 -10   66.37   13.48
   0  14 -10   44.60   35.53
   0 -14  11 2297.19   98.45
   0 -14 -11 2774.15  108.09
   0 -14 -11 2014.26   90.19
   0  14 -11 2481.20  106.00
   0 -14  12   45.99   26.77
   0 -14 -12   27.83   14.88
   0 -14 -12   44.81   13.48
   0  14 -12   10.08   18.42
   0 -14  13  519.56   63.82
   0 -14 -13  557.87   44.97
   0 -14 -13  442.29   40.00
   0  14 -13  579.96   49.74
   0 -14  14  311.37   37.28
   0 -14 -14  388.97   33.63
   0 -14 -14  295.95   41.04
   0  14 -14  272.67   34.92
   0 -14  15  109.63   23.51
   0 -14 -15  150.82   25.82
   0 -14 -15  116.88   29.12
   0  14 -15   74.99   77.45
   0 -14  16   78.45   17.01
   0 -14 -16   68.83   24.44
   0 -14 -16   29.56   12.19
   0  14 -16   54.61   39.40
   0 -14  17  472.96   42.51
   0 -14 -17  507.59   36.75
   0 -14 -17  484.22   44.51
   0  14 -17  626.27   55.59
   0 -14  18   55.78   17.13
   0 -14 -18   74.90   22.69
   0 -14 -18   29.87   16.78
   0  14 -18   66.74   26.69
   0 -14  19   16.72   11.12
   0 -14 -19   12.18   17.38
   0  14 -19   21.06   16.74
   0 -14  20  182.78   30.54
   0 -14 -20  124.21   33.28
   0  14 -20  134.65   38.41
   0 -14  21  120.04   28.07
   0 -14 -21  153.59   29.45
   0  14 -21  155.82   33.16
   0 -14  22   50.61   31.66
   0 -14 -22   40.91   31.37
   0  14 -22   44.09   36.85
   0 -14  23  443.09   50.13
   0 -14 -23  382.33   47.66
   0  14 -23  693.00   69.00
   0 -15   0   16.63   13.45
   0 -15   1   26.31    9.46
   0 -15  -1   18.09   15.43
   0 -15  -1   14.67   13.02
   0 -15   1   19.19   13.91
   0 -15  -2    6.57    8.47
   0 -15  -2   13.73    9.70
   0 -15   2   16.97   13.21
   0 -15   3    7.87    5.32
   0 -15  -3   10.48    7.94
   0 -15   4   22.39   12.48
   0 -15  -4   10.94    8.65
   0 -15  -4   20.26   15.85
   0  15  -4   12.54    6.57
   0  15  -5   35.45   21.77
   0 -15   6   18.75   10.14
   0 -15  -6   13.68    4.15
   0 -15  -6    3.03    8.69
   0  15  -6   13.12   15.68
   0 -15   7   15.43   11.18
   0 -15  -7    1.59    7.35
   0 -15  -7    4.61    9.08
   0  15  -7    2.79   11.45
   0 -15   8    2.80   12.34
   0 -15  -8    8.21   13.76
   0 -15  -8   19.62   17.95
   0 -15   9   13.25   17.53
   0 -15  -9   27.79   19.25
   0 -15  -9   15.58   18.27
   0  15  -9   35.50   16.63
   0 -15  10   40.09   32.19
   0 -15 -10   18.48   10.29
   0 -15 -10   10.96   10.63
   0  15 -10   19.06   18.42
   0 -15  11   14.90   12.04
   0 -15 -11   28.68   14.96
   0 -15 -11   23.98   16.37
   0 -15 -12   26.47   26.75
   0 -15 -12   22.68   11.79
   0  15 -12   17.10   14.58
   0 -15 -13   23.52   17.71
   0 -15 -13    5.10   16.51
   0  15 -13    8.52   13.52
   0 -15  14   13.47   14.65
   0 -15 -14    6.99   10.93
   0 -15 -14   10.25   11.91
   0  15 -14   15.34   21.63
   0 -15 -15   15.64   15.34
   0 -15 -15   17.20   16.82
   0 -15  16   19.94   10.55
   0 -15 -16   21.55   11.03
   0 -15 -16    5.89   11.46
   0  15 -16   11.35   11.29
   0 -15  17   20.01   17.56
   0 -15 -17   10.79   10.83
   0  15 -17   18.24   13.97
   0 -15  18   32.22   13.32
   0 -15 -18   18.17   14.76
   0  15 -18   14.30   13.94
   0 -15  19   16.96   10.34
   0 -15 -19   10.69   13.30
   0 -15  20   33.66   17.27
   0 -15 -20    3.20   12.35
   0  15 -20    2.00    9.69
   0 -15  21   14.41    9.58
   0 -15 -21    8.92   10.18
   0  15 -21    8.67   10.75
   0 -15  22   43.20   21.86
   0 -15 -22   21.84   14.52
   0  15 -22   39.74   19.89
   0 -16   0 3015.69  114.09
   0 -16   0 2438.92   96.22
   0 -16   1  269.85   28.08
   0 -16  -1  300.48   29.79
   0 -16  -1  281.08   29.15
   0 -16   1  271.34   42.95
   0 -16   2   93.14   24.81
   0 -16  -2  107.12   22.87
   0 -16  -2   68.68   24.50
   0 -16   2   48.25    9.36
   0 -16   3  127.74   27.56
   0 -16  -3  111.54   25.12
   0 -16  -3   62.18   16.83
   0  16  -3  107.89   27.42
   0 -16   4 2367.26  110.80
   0 -16  -4 2532.90   96.94
   0 -16  -4 1965.03   83.45
   0  16  -4 2185.67   89.28
   0 -16  -5   12.94   11.77
   0  16  -5   12.51   20.68
   0 -16   6 3524.54   76.89
   0 -16  -6 3774.00   68.11
   0 -16  -6 2610.07  110.82
   0  16  -6 3198.06  127.69
   0 -16   7   73.13   20.27
   0 -16  -7   99.84   25.78
   0 -16  -7   82.13   14.74
   0  16  -7   45.83   32.53
   0 -16   8  153.97   24.47
   0 -16  -8  164.10   19.47
   0 -16  -8   89.23   28.04
   0  16  -8  146.34   25.76
   0 -16   9   37.96    9.75
   0 -16  -9   28.57   14.50
   0 -16  -9   30.99   20.95
   0  16  -9   35.21   13.09
   0 -16  10  338.81   35.18
   0 -16 -10  379.83   33.93
   0 -16 -10  256.10   29.01
   0  16 -10  303.50   43.51
   0 -16  11  327.84   40.95
   0 -16 -11  267.73   26.34
   0 -16 -11  304.19   40.09
   0  16 -11  297.56   37.11
   0 -16  12 1347.11   83.62
   0 -16 -12 1476.97   78.66
   0 -16 -12 1082.68   69.47
   0  16 -12 1038.30   75.77
   0 -16  13   69.17   20.86
   0 -16 -13  100.01   24.27
   0 -16 -13   69.59   34.48
   0  16 -13  106.09   34.69
   0 -16  14   69.64   19.06
   0 -16 -14  204.72   33.02
   0 -16 -14  169.07   34.43
   0  16 -14  179.54   28.64
   0 -16  15  214.48   37.36
   0 -16 -15  349.19   34.71
   0 -16 -15  213.65   32.33
   0  16 -15  373.34   41.53
   0 -16  16  222.03   43.43
   0 -16 -16  322.40   36.44
   0 -16 -16  213.52   30.16
   0  16 -16  214.88   38.93
   0 -16  17   22.30   12.40
   0 -16 -17   37.40   27.69
   0  16 -17   20.55   28.60
   0 -16  18  138.05   29.33
   0 -16 -18  219.06   48.81
   0  16 -18  244.94   58.15
   0 -16  19   66.55   20.86
   0 -16 -19   39.16   32.68
   0  16 -19   26.04   24.55
   0 -16  20   70.97   33.42
   0 -16 -20  182.03   38.51
   0  16 -20  191.90   39.72
   0 -16  21   36.99   17.98
   0 -16 -21   17.68   14.40
   0 -17   0   26.40    9.26
   0 -17   0   27.37   13.05
   0 -17  -1   43.68   18.23
   0 -17   1    6.21   13.28
   0 -17  -1   22.33   16.46
   0 -17   2   20.49   12.86
   0 -17  -2   16.40   21.79
   0 -17   2   24.21   14.52
   0 -17  -2   15.09   13.44
   0 -17   3   19.44   12.94
   0 -17  -3   11.77    7.22
   0 -17  -3   26.01   16.51
   0 -17   4    5.82    8.17
   0 -17  -4   13.93    6.48
   0 -17  -4   10.61    8.77
   0  17  -4    4.68   13.24
   0 -17   5    7.01   11.19
   0 -17  -5   18.94    8.61
   0 -17  -5   11.32    8.50
   0  17  -5   13.65   26.78
   0 -17   6   29.74   28.03
   0 -17  -6   17.55   15.20
   0 -17  -6    8.66    8.29
   0  17  -6   10.25   14.77
   0 -17   7   14.70   10.92
   0 -17  -7   16.78   11.19
   0  17  -7    7.39   11.58
   0 -17   8   11.98    6.87
   0 -17  -8   19.51   17.54
   0 -17  -8   14.02    6.13
   0 -17   9   27.68   14.76
   0 -17  -9   18.30   13.14
   0 -17  -9   19.53    8.26
   0  17  -9    5.87   12.97
   0 -17 -10   17.47   14.19
   0 -17 -10   26.81   19.32
   0  17 -10    2.85   14.94
   0 -17  11   21.10   16.69
   0 -17 -11   37.45   18.65
   0 -17 -11   15.55   10.03
   0  17 -11    7.30   18.39
   0 -17  12   24.14   13.78
   0 -17 -12   10.55   11.57
   0 -17 -12   34.68   20.05
   0  17 -12   10.41   19.64
   0 -17  13   10.37    8.25
   0 -17 -13   13.11   22.99
   0 -17 -13    7.15   15.21
   0  17 -13   30.77   15.88
   0 -17  14   20.35   15.52
   0 -17 -14   19.32   10.76
   0 -17 -14   19.29   21.52
   0  17 -14   20.38   17.43
   0 -17  15    9.18   10.84
   0 -17 -15   14.82   15.75
   0 -17 -15    6.39   11.43
   0  17 -15   10.00   24.63
   0 -17  16   18.50   10.96
   0  17 -16    7.85   21.28
   0 -17  17   16.95    6.18
   0 -17  18   47.37   18.33
   0 -17 -18   33.99   20.60
   0  17 -18    9.74   13.89
   0 -17  19   10.91   10.22
   0 -17 -19   27.71   15.63
   0  17 -19   18.12   18.86
   0 -17  20   12.18   11.44
   0 -17 -20   18.40   12.95
   0  17 -20   13.52   25.43
   0 -18   0  143.03   26.89
   0 -18   0   99.85   21.23
   0 -18   1 1317.42   61.79
   0 -18  -1 1457.02   66.39
   0 -18  -1 1132.59   57.78
   0 -18   1 1133.59   59.92
   0 -18  -2   57.91   23.77
   0 -18   2  126.22   25.01
   0 -18   2   66.77   21.36
   0 -18  -2   64.58   17.65
   0 -18   3   26.79    6.32
   0 -18  -3   25.11    7.74
   0 -18  -3   12.00    8.79
   0  18  -3   15.03   25.03
   0 -18   4   85.58   18.15
   0 -18  -4   58.98   13.11
   0 -18  -4   34.60   20.54
   0  18  -4   28.86   19.67
   0 -18   5 1339.12   66.56
   0 -18  -5 1516.55   69.37
   0 -18  -5 1062.10   57.00
   0  18  -5 1291.73   64.96
   0 -18   6  649.03   51.23
   0 -18  -6  719.06   44.45
   0 -18  -6  527.07   43.53
   0  18  -6  804.08   53.77
   0 -18   7  585.64   49.61
   0 -18  -7  636.95   44.66
   0 -18  -7  414.18   44.20
   0  18  -7  476.76   45.57
   0 -18   8   34.35   16.93
   0 -18  -8    7.33    7.87
   0 -18  -8    6.57   14.49
   0  18  -8    5.16    9.40
   0 -18  -9   19.20   17.59
   0 -18  -9   28.37   33.28
   0  18  -9    9.18   12.67
   0 -18  10  270.86   36.13
   0 -18 -10  273.26   24.30
   0 -18 -10  226.41   33.61
   0  18 -10  197.86   28.68
   0 -18  11  181.84   31.65
   0 -18 -11  121.65   22.38
   0 -18 -11   88.30   21.08
   0  18 -11  215.76   30.85
   0 -18  12  229.74   31.06
   0 -18 -12  161.08   21.57
   0 -18 -12  175.69   27.55
   0  18 -12  189.93   51.97
   0 -18  13   76.15   24.35
   0 -18 -13   91.20   21.40
   0 -18 -13   27.24   17.86
   0  18 -13   40.71   47.06
   0 -18  14   35.55   12.53
   0 -18 -14   66.63   20.54
   0 -18 -14   16.77   24.99
   0  18 -14   48.29   26.55
   0 -18  15   25.70   22.70
   0 -18 -15   28.93   23.07
   0  18 -15   17.12   18.37
   0 -18  16   22.96   18.23
   0 -18 -16   11.34   16.44
   0  18 -16   34.78   25.03
   0 -18  17  369.91   40.71
   0 -18 -17  236.84   38.32
   0  18 -17  403.15   43.41
   0 -18  18   89.99   32.20
   0 -18 -18   70.80   20.22
   0  18 -18   44.51   18.72
   0 -18  19   45.60   19.86
   0 -18 -19   70.51   32.95
   0  18 -19   46.03   37.43
   0 -19   0   51.94   23.57
   0 -19   0   12.19   11.38
   0 -19   1   17.77   22.03
   0 -19  -1   26.12   20.55
   0 -19   1   29.38   17.31
   0 -19  -1    6.59   10.00
   0 -19  -2   12.49   16.58
   0 -19   2   13.47   20.29
   0 -19  -2   21.28   10.26
   0 -19  -3   15.30    9.58
   0 -19   3   19.77   19.23
   0 -19  -3   19.49   11.76
   0  19  -3    6.76   14.52
   0 -19  -4   34.65   17.59
   0 -19  -4   28.19   16.18
   0  19  -4   31.74   18.05
   0 -19   5   26.03   21.63
   0 -19  -5   39.85   20.20
   0 -19  -5   15.20   15.98
   0  19  -5   11.72    9.80
   0 -19   6   29.53   22.03
   0 -19  -6   16.72    8.00
   0 -19  -6   26.18   29.16
   0  19  -6   12.00    6.82
   0 -19   7   22.95   14.00
   0 -19  -7   14.30    9.10
   0 -19  -7   11.56    9.29
   0  19  -7    9.83   11.20
   0 -19  -8   20.48   13.62
   0 -19  -8   23.62   12.78
   0  19  -8   26.49   21.85
   0 -19   9   26.84    7.86
   0 -19  -9   23.62   19.67
   0  19  -9   27.89   18.69
   0 -19  10   28.97   18.62
   0 -19 -10    9.80    6.68
   0 -19 -10   23.97   18.97
   0  19 -10   16.96   19.23
   0 -19  11   22.91   10.00
   0 -19 -11   19.06   11.34
   0 -19 -11    7.65   12.91
   0  19 -11    9.87   16.78
   0 -19  12   15.92   12.32
   0 -19 -12   14.00   15.43
   0 -19 -12    7.36   11.25
   0  19 -12   12.92   21.66
   0 -19  13   37.58   19.50
   0 -19 -13   19.88    8.30
   0 -19 -13   20.70   10.01
   0 -19  14   22.12   16.19
   0 -19 -14   14.73   15.06
   0 -19  15   34.30   17.83
   0 -19 -15   12.33   19.50
   0  19 -15   41.22   19.11
   0 -19  16   24.11   28.46
   0 -19 -16    9.17   10.80
   0  19 -16    7.30   24.75
   0 -19  17   29.28   14.43
   0 -19 -17   20.31   13.28
   0  19 -17   17.80   22.95
   0 -20   0  391.48   48.52
   0 -20   0  263.82   34.57
   0 -20   1  942.29   62.80
   0 -20  -1 1039.33   67.56
   0 -20   1  830.44   60.80
   0 -20  -1  776.57   57.62
   0 -20   2  406.54   47.15
   0 -20  -2  288.55   38.51
   0 -20  -2  232.24   34.21
   0  20  -2  258.22   33.00
   0 -20  -3  285.44   30.71
   0 -20   3  331.37   35.41
   0 -20  -3  265.82   27.67
   0  20  -3  276.06   30.02
   0 -20  -4    4.56   12.00
   0 -20   4   41.02   26.02
   0 -20  -4   33.08   14.78
   0  20  -4   18.43   16.26
   0 -20   5 1263.36   83.77
   0 -20  -5 1352.93   88.37
   0 -20  -5  931.15   66.11
   0  20  -5 1026.90   74.15
   0 -20   6   50.38   19.80
   0 -20  -6   92.66   24.53
   0 -20  -6   57.31   29.69
   0  20  -6   57.76   46.35
   0 -20   7  359.20   41.69
   0 -20  -7  315.95   33.71
   0 -20  -7  226.92   42.07
   0  20  -7  316.64   35.13
   0 -20   8   15.39   14.85
   0 -20  -8   31.29   16.43
   0 -20  -8   29.49   12.64
   0  20  -8   13.54   22.22
   0 -20   9   54.94   17.50
   0 -20  -9   62.55   21.84
   0 -20  -9   33.69   18.01
   0  20  -9   19.35   19.56
   0 -20  10  210.16   33.04
   0 -20 -10  180.79   23.52
   0 -20 -10  136.30   25.91
   0  20 -10  189.22   35.67
   0 -20  11   97.11   28.39
   0 -20 -11  161.00   28.95
   0 -20 -11   72.67   38.37
   0  20 -11   98.19   23.07
   0 -20  12  146.48   40.91
   0 -20 -12  194.23   29.77
   0 -20 -12   51.30   21.93
   0  20 -12  139.19   32.13
   0 -20  13   74.46   33.60
   0 -20 -13   31.30   15.80
   0  20 -13   30.53   44.16
   0 -20 -14   10.31   13.74
   0  20 -14   16.01   18.77
   0 -20  15  104.65   27.43
   0 -20 -15   95.41   29.19
   0  20 -15  113.21   41.29
   0 -20  16   22.82   24.12
   0 -20 -16   62.56   21.67
   0  20 -16   66.06   25.90
   0 -21   0   15.84    8.39
   0 -21   0   13.25   13.35
   0 -21   1   15.14   14.81
   0 -21  -1   14.22   11.10
   0 -21  -2   36.11   17.57
   0 -21   2   25.44   19.86
   0 -21  -2   21.26   15.52
   0 -21   3   15.85   17.14
   0 -21  -3   15.58   22.57
   0  21  -3   30.96   18.03
   0 -21   4   17.39   19.79
   0 -21  -4   18.75   14.70
   0 -21  -4   23.19    9.81
   0 -21  -5   25.54   10.08
   0 -21  -5   38.12   17.90
   0  21  -5   16.98   14.07
   0 -21   6   17.10    9.46
   0 -21  -6   29.64   14.02
   0 -21  -6   41.05   20.14
   0 -21   7   41.93   19.55
   0 -21  -7   19.73   16.66
   0 -21  -7    4.29    7.89
   0 -21   8   28.60   18.16
   0 -21  -8   31.61   21.18
   0 -21  -8   21.07   14.00
   0  21  -8   18.89   22.45
   0 -21   9   17.95   13.68
   0 -21  -9    3.76    8.50
   0 -21  -9   37.90   20.13
   0  21  -9   15.93   15.87
   0 -21  10   29.46   12.65
   0 -21 -10    3.35    6.98
   0 -21 -10    7.48   17.83
   0  21 -10    5.02   17.77
   0 -21  11   25.56   11.55
   0 -21 -11   12.74   10.43
   0 -21 -11   35.44   17.59
   0  21 -11   36.82   16.91
   0 -21  12   24.09   22.19
   0 -21 -12   14.87   13.41
   0  21 -12   15.66   12.03
   0 -21  13   14.26   19.40
   0 -21 -13   31.60   14.50
   0  21 -13   10.12   15.81
   0 -21  14   16.59   10.26
   0 -21 -14   27.39   14.23
   0  21 -14   33.71   19.73
   0 -22   0 1988.90  156.45
   0 -22   0 1812.69   64.84
   0 -22   1   23.52   14.33
   0 -22  -1   24.96   19.16
   0 -22  -1    6.21    5.51
   0  22  -1    9.12   19.94
   0 -22   2  361.68   41.35
   0 -22  -2  384.35   53.80
   0 -22  -2  212.19   34.40
   0  22  -2  357.09   53.40
   0 -22  -3   27.89   20.32
   0 -22   3   24.65   23.33
   0 -22  -3   41.44   20.24
   0  22  -3    6.17   15.64
   0 -22  -4  133.80   35.74
   0 -22   4  161.46   41.62
   0 -22  -4   87.98   26.64
   0  22  -4  115.80   25.42
   0 -22  -5  113.99   39.63
   0 -22   5   51.54   20.61
   0 -22  -5   54.05   25.23
   0  22  -5   37.75   32.88
   0 -22  -6  493.05   51.03
   0 -22   6  389.55   40.02
   0 -22  -6  319.69   48.78
   0  22  -6  423.58   50.19
   0 -22   7   16.19   19.35
   0 -22  -7   37.66   16.81
   0 -22  -7   58.40   21.98
   0  22  -7   32.69   16.66
   0 -22   8  149.76   32.53
   0 -22  -8  139.43   32.41
   0 -22  -8   92.47   26.07
   0  22  -8   99.15   23.33
   0 -22   9   74.82   31.67
   0 -22  -9   35.95   17.53
   0 -22  -9   89.28   27.47
   0  22  -9   48.49   29.81
   0 -22  10  452.56   62.86
   0 -22 -10  449.29   58.10
   0 -22 -10  374.58   53.19
   0  22 -10  404.47   61.86
   0 -22  11   17.13   13.02
   0 -22 -11   19.12   12.93
   0  22 -11   23.80   28.45
   0 -22  12  178.91   31.57
   0 -22 -12  180.53   34.18
   0  22 -12  184.18   32.22
   0 -23  -1   23.69   14.48
   0 -23   1   12.46   10.41
   0 -23  -1   22.84   15.00
   0  23  -1   14.91   13.40
   0 -23   2   26.71   10.91
   0 -23  -2   22.09   17.24
   0 -23  -2   32.66   15.84
   0  23  -2   15.95   14.78
   0 -23   3   18.64   16.22
   0 -23  -3   15.43   18.44
   0 -23  -3    5.32    8.98
   0 -23  -4   17.47    8.63
   0 -23   4   62.01   26.22
   0 -23  -4   21.75   13.38
   0  23  -4    8.36   18.21
   0 -23   5   13.91   16.77
   0 -23  -5   21.75   12.88
   0 -23  -5   15.81   15.20
   0  23  -5    8.44    9.60
   0 -23  -6    3.20    6.98
   0 -23   6   17.22   11.98
   0 -23  -6   33.28   17.60
   0  23  -6    9.20   11.57
   0 -23  -7   27.63   13.16
   0 -23   7   33.72   21.35
   0 -23  -7   28.88   13.12
   0  23  -7   15.44   26.55
   0 -23   8   12.65   17.62
   0 -23  -8    8.41    6.22
   0 -23  -8   26.88   11.34
   0  23  -8   13.73   11.34
   0 -23  -9   22.56   21.52
   0 -23   9   46.29   28.07
   0 -23  -9   63.91   15.78
   0  23  -9   11.68   13.79
   0 -24   0  672.05   63.44
   0  24   0  590.95   61.19
   0 -24  -1  319.70   50.03
   0 -24   1  337.50   45.92
   0 -24  -1  286.20   45.79
   0  24  -1  210.12   51.41
   0 -24  -2   87.66   24.61
   0 -24   2   88.93   27.04
   0 -24  -2  114.35   33.83
   0  24  -2   36.80   22.78
   0 -24  -3    9.08   13.06
   0 -24   3   24.56   16.52
   0 -24  -3   58.91   26.23
   0 -24  -4  135.59   26.47
   0 -24   4   74.44   27.97
   0 -24  -4   73.66   24.27
   0  24  -4   22.78   23.83
   0 -24   5  372.01   48.31
   0 -24  -5  364.32   40.56
   0 -24  -5  311.59   43.73
   0  24  -5  389.05   50.28
  -1   0  -3    9.46    5.38
  -1   0   3    6.07    3.20
   1   0  -3    5.78    3.31
   1   0  -3    2.78    3.93
  -1   0  -3    2.06    3.81
   1   0   3    7.21    7.86
   1   0   4 1950.43   79.78
  -1   0  -4 2129.36   86.90
  -1   0   4 2488.55  101.41
   1   0   4 2511.36  102.20
  -1   0  -5    6.31    2.85
  -1   0   5    6.83    5.78
   1   0  -5    7.87    4.43
   1   0  -5    2.77    4.90
  -1   0   5    7.34    7.03
  -1   0  -5    4.51    6.87
   1   0   5    3.96    6.04
   1   0   6 1642.83   69.73
  -1   0   6 1634.14   67.53
  -1   0  -6 1753.64   74.08
   1   0  -6 1963.63   82.99
  -1   0  -6 2022.61   85.09
  -1   0   6 2093.42   87.51
   1   0   6 2103.11   88.21
   1   0   7    7.01    4.32
   1   0  -7   17.03    8.38
  -1   0  -7    5.37    7.48
  -1   0   7    4.99    2.57
  -1   0   7    7.68    9.32
  -1   0  -7    7.95   10.06
   1   0  -7    1.54    7.93
   1   0   8   40.71    8.68
  -1   0   8   56.01    9.45
  -1   0  -8   52.09   14.72
   1   0  -8   41.68    7.59
   1   0  -8   52.26   25.20
  -1   0   8   43.48   19.84
  -1   0  -8   49.34   26.35
   1   0   8   52.09   14.70
  -1   0   9   14.21    7.85
   1   0   9   11.28   10.49
  -1   0  -9    2.02    3.45
   1   0  -9    7.84    7.65
   1   0  -9   13.84   10.81
  -1   0  -9    8.26    8.34
  -1   0   9   10.65    9.25
   1   0   9    7.56    7.76
  -1   0  10   57.35    8.37
   1   0  10   40.05   19.97
   1   0 -10   75.85   10.36
  -1   0 -10   82.59   11.48
  -1   0 -10   47.49   12.54
   1   0 -10   87.83   64.69
  -1   0  11    4.30    5.72
   1   0  11    8.46    4.21
   1   0 -11   11.83    4.23
  -1   0 -11   20.52   13.79
   1   0 -11    4.16    5.67
  -1   0  12  561.64   34.74
   1   0  12  536.08   34.33
   1   0 -12  714.23   41.58
   1   0 -12  733.84   46.50
  -1   0 -12  677.89   46.61
   1   0  13   12.68    9.76
   1   0 -13    9.77   10.32
   1   0 -13    7.79   16.33
  -1   0 -13    8.91   10.78
   1   0  14  619.80   36.97
  -1   0  14  556.21   32.19
  -1   0 -14  720.41   46.39
   1   0 -14  712.53   44.76
   1   0  15   12.27    5.51
  -1   0  15   24.00    9.08
  -1   0 -15    5.12    5.30
   1   0 -15   67.69   19.71
  -1   0  16  240.89   23.74
   1   0  16  252.34   25.32
   1   0 -16  304.63   34.45
  -1   0 -16  266.43   35.00
   1   0  17   15.84    6.61
  -1   0  17    5.25    5.57
   1   0 -17   29.34   21.66
  -1   0 -17   71.36   25.03
   1   0  18   68.52   16.35
  -1   0  18   64.91   11.21
   1   0 -18  109.57   18.94
  -1   0 -18   42.68   25.41
   1   0  19   15.37    7.45
  -1   0  19  174.80  147.16
   1   0 -19    6.01    9.38
  -1   0 -19   30.89   21.39
  -1   0  20  472.47   32.64
   1   0 -20  452.80   43.38
  -1   0 -20  445.28   37.51
  -1   0 -21   14.58   12.54
  -1   0 -21   20.39   13.51
   1   0 -21   22.98   21.75
  -1   0  22   27.87   11.05
  -1   0 -22   54.74   14.74
   1   0 -22   56.36   38.19
  -1   0 -22   50.43   17.22
  -1   0 -23   21.25   23.84
   1   0 -23   16.75   21.35
  -1   0 -23   16.32   15.16
   1   0 -24  428.67   37.66
  -1   0 -24  395.11   36.64
   1   0 -24  469.03   49.91
  -1   0 -24  561.00   58.86
  -1   0 -25   19.11   14.14
   1   0 -25    8.94   16.97
   1   0 -25   17.20   15.75
  -1   0 -25   23.94   23.27
   1   0 -26   37.29   25.10
  -1   0 -26   37.14   20.43
  -1   0 -26   23.96   16.48
   1   0 -26   54.16   28.89
  -1   0 -27   15.76   18.22
  -1   0 -27   19.88   18.06
   1   0 -27    2.29   10.28
  -1   0 -28   20.21   14.24
   1   0 -28   23.87   19.98
  -1   0 -28   25.07   30.24
   1   1   4   14.56    6.39
  -1  -1   4   19.67   17.00
   1  -1  -4   11.83   14.32
   1  -1  -4   24.08   13.68
  -1   1  -4   31.21   14.09
  -1  -1   4   32.91    8.81
  -1   1  -4   24.98   15.72
   1   1  -4   37.94    7.74
  -1  -1  -4   12.25    8.62
  -1   1   4   22.09    9.65
  -1  -1  -4   24.35   10.96
  -1   1   4   18.61    9.96
   1  -1   4   29.94    9.89
  -1  -1  -4   38.79    7.88
   1  -1   4   21.75   16.09
   1   1  -4   20.28    7.47
  -1  -1   6  402.47   23.94
   1  -1  -6  290.20   72.85
   1  -1  -6  289.26   18.29
  -1  -1   6  336.33   18.30
  -1   1  -6  281.03   17.95
   1   1   6  310.28   23.23
   1  -1   6  279.88   45.01
   1   1  -6  353.44   19.04
   1   1  -6  361.44   25.41
  -1   1   6  315.93   20.14
  -1   1   6  267.24   65.69
  -1  -1  -6  271.86   36.27
  -1  -1  -6  277.61   19.44
   1  -1   6  313.44   40.05
  -1  -1   7  565.89   27.89
  -1   1  -7  675.18   37.31
   1   1   7  494.04   25.77
  -1   1  -7  607.83   31.52
   1  -1  -7  581.02   30.15
   1  -1  -7  590.10   53.06
   1   1   7  682.79   36.09
  -1  -1   7  717.97   35.49
   1  -1   7  543.54   28.27
  -1  -1  -7  538.16   27.24
   1   1  -7  636.09   30.37
   1   1  -7  578.94   33.22
  -1  -1  -7  618.99   34.29
  -1   1   7  715.39   38.01
  -1   1   7  455.03   43.84
   1  -1   7  706.92   36.45
  -1   1  -8  764.02   36.76
  -1  -1   8  778.06   37.93
   1   1   8  578.28   33.48
  -1  -1   8  693.14   33.69
   1  -1  -8  665.78   30.89
  -1   1  -8  688.89   37.35
   1   1   8  841.23   42.58
   1  -1   8  578.75   30.68
   1   1  -8  788.66   35.74
  -1  -1  -8  677.00   36.72
   1   1  -8  787.72   41.81
  -1   1   8  819.55   40.59
   1  -1   8  841.46   41.99
  -1  -1  -8  686.91   33.30
  -1   1  -9  559.98   32.67
  -1  -1   9  740.29   42.43
   1   1   9  717.84   43.28
  -1  -1   9  600.41   34.31
   1  -1  -9  675.27   59.08
   1  -1  -9  657.19   67.88
  -1   1  -9  616.36   39.59
   1  -1   9  591.37   35.78
   1   1  -9  719.92   39.07
  -1  -1  -9  629.99   35.41
   1   1  -9  641.92   41.60
  -1   1   9  798.27   45.33
   1  -1   9  708.24   41.35
  -1   1   9  495.01   29.97
   1   1  10  240.72   40.59
  -1  -1  10  278.01   20.76
   1  -1 -10  243.56  100.12
   1  -1 -10  278.27   18.24
  -1   1 -10  236.35   20.44
  -1   1 -10  275.37   20.59
  -1  -1 -10  262.31   20.46
   1  -1  10  232.87   41.17
  -1   1  10  191.86   11.25
   1   1 -10  251.02   25.58
   1   1 -10  325.12   57.00
  -1  -1 -10  276.77   27.58
  -1   1 -11 1332.56   84.91
   1   1  11 1161.66   54.40
   1  -1 -11 1446.74   69.16
  -1  -1  11 1328.87   60.56
   1   1 -11 1528.18   67.57
   1  -1  11 1173.96   55.63
  -1   1  11 1230.65   55.48
   1   1 -11 1458.01   70.16
  -1  -1  12    8.22   11.44
   1  -1 -12    6.39    5.52
  -1   1 -12    9.87   10.75
  -1   1  12    1.81    3.04
   1   1 -12    7.39    8.71
  -1  -1 -12   10.16    7.92
   1   1 -12   16.36   19.56
  -1  -1  13 1887.33   86.48
   1  -1 -13 2186.45   96.55
   1   1  13 1649.49   91.14
   1  -1 -13 2006.98   93.30
  -1   1 -13 2250.71  105.04
   1  -1  13 1636.04   76.35
  -1   1  13 1612.46   73.06
  -1  -1 -13 2296.93  106.10
   1   1 -13 2164.56  100.57
  -1  -1  14 1610.32   75.51
   1  -1 -14 1620.06  112.05
   1   1  14 1309.97   80.83
  -1   1 -14 1699.71   84.24
   1  -1  14 1393.47   68.73
  -1   1  14 1335.73   74.03
   1   1 -14 1929.03   99.56
  -1  -1 -14 1661.46   92.89
  -1  -1  15 2435.00   68.86
   1  -1 -15 2776.37   81.97
  -1   1 -15 2753.53   82.43
  -1   1  15 2398.86   65.89
   1  -1  15 2499.11   72.56
  -1  -1 -15 2825.63   82.71
   1   1 -15 2906.11   86.43
   1  -1 -16   25.02   10.58
  -1  -1  16   38.50    8.94
  -1   1 -16   52.52   26.50
   1  -1  16   57.99   16.73
  -1   1  16   37.43   16.01
  -1  -1 -16   27.62   14.75
   1   1 -16   22.65   27.19
  -1  -1  17  333.33   26.62
   1  -1 -17  393.12   80.71
  -1   1 -17  402.01   35.18
  -1   1  17  318.55   22.48
   1  -1  17  317.98   27.21
  -1  -1 -17  353.83   27.68
  -1  -1 -17  475.26   37.96
   1   1 -17  390.45   35.62
  -1   1 -18  245.07   28.89
  -1  -1  18  274.43   25.40
   1  -1 -18  215.47   22.79
   1  -1  18  221.76   22.65
  -1  -1 -18  225.79   27.66
  -1  -1 -18  276.49   27.10
  -1   1  18  203.57   25.22
   1   1 -18  263.85   35.97
  -1  -1  19 1139.61   51.51
  -1   1 -19 1380.98   65.61
   1  -1 -19 1501.74   73.06
   1  -1  19 1188.91   55.44
  -1  -1 -19 1526.27   70.57
  -1  -1 -19 1313.52   58.83
   1   1 -19 1519.97   77.77
  -1  -1  20  279.10   26.16
  -1   1 -20  283.70   31.44
   1  -1 -20  325.80   32.90
   1  -1 -20  288.04   25.23
  -1  -1 -20  311.22   35.01
  -1  -1 -20  290.29   35.89
   1   1 -20  263.86   38.28
   1  -1  20  236.77   24.97
  -1  -1  21  119.46   15.31
  -1   1 -21  144.69   23.42
   1  -1 -21   89.32   25.43
   1  -1 -21  179.66   49.98
  -1  -1 -21  129.48   21.83
  -1  -1 -21   97.48   23.00
   1   1 -21  190.34   26.62
   1  -1  21  127.70   19.07
  -1  -1  22   18.25    6.61
   1  -1 -22   22.89    9.23
   1  -1 -22   17.64   13.66
  -1   1 -22   22.02   14.88
   1  -1  22    7.74    8.35
   1   1 -22   16.10    9.29
  -1  -1 -22    6.36   15.85
  -1  -1  23   20.43   10.72
   1  -1 -23   73.34   21.78
  -1   1 -23   28.14   22.32
   1  -1 -23   52.91   32.56
  -1  -1 -23   24.89   21.88
  -1  -1 -23   47.14   31.73
   1   1 -23   12.04   20.66
  -1  -1  24   94.39   20.91
   1  -1 -24  167.70   34.00
  -1   1 -24  132.80   24.52
  -1   1 -24  142.01   30.62
   1  -1 -24   69.65   71.75
  -1  -1 -24  162.83   26.10
   1   1 -24  164.27   42.10
  -1  -1 -24  189.99   45.59
   1  -1 -25  437.73   52.35
  -1   1 -25  420.54   41.26
   1  -1 -25  447.04   47.92
  -1   1 -25  512.54   51.68
  -1  -1 -25  470.94   46.12
  -1  -1 -25  462.77   47.87
   1   1 -25  606.39   60.23
   1  -1 -26  106.62   23.51
  -1   1 -26   98.89   41.50
  -1   1 -26   68.09   22.55
   1  -1 -26  172.85   40.12
   1   1 -26   90.55   62.82
  -1  -1 -26   44.51   50.39
   1   1 -26   54.77   23.76
  -1  -1 -26  114.48   28.30
  -1   1 -27   49.92   40.50
   1  -1 -27   41.77   31.92
  -1   1 -27   45.72   40.22
  -1  -1 -27   51.21   18.24
  -1  -1 -27   33.48   23.66
   1   1 -27   60.41   23.42
   1   1 -27   45.39   27.05
  -1   1 -28   17.68   16.37
  -1   1 -28   16.16   29.94
   1  -1 -28   20.52   26.74
  -1  -1 -28    3.47    9.78
   1   1 -28   13.84   16.92
  -1  -1 -28   30.32   28.77
   1  -2   2   70.63   15.47
  -1  -2   3 1690.70   69.93
  -1   2  -3 1586.17   66.01
  -1  -2   3 1751.34   72.25
   1  -2  -3 1452.85   61.13
   1   2   3 1518.62   62.78
  -1   2  -3 1675.52   69.26
   1   2   3 1632.30   67.09
   1   2  -3 1791.04   73.47
  -1   2   3 1620.86   67.09
  -1  -2  -3 1635.98   67.56
   1   2  -3 1733.41   71.16
  -1  -2  -3 1505.09   62.32
   1  -2   3 1503.05   63.06
   1  -2   3 1651.44   68.54
   1  -2   4 3649.53  146.68
   1  -2   4 4352.21  174.47
   1  -2  -5  507.37   24.11
  -1   2  -5  626.31   30.27
   1  -2  -5  641.77   32.93
  -1   2  -5  717.63   34.97
  -1  -2   5  650.26   30.87
   1  -2  -5  518.03   23.52
   1   2   5  635.30   31.00
   1   2   5  695.11   33.66
  -1  -2   5  623.41   31.45
   1   2  -5  771.94   35.00
  -1   2   5  704.20   34.61
   1  -2   5  588.92   29.55
  -1  -2  -5  613.46   29.42
  -1  -2  -5  627.62   31.32
   1   2  -5  684.05   33.29
   1  -2   5  762.06   38.31
  -1  -2   6    8.37    3.55
   1  -2  -6    3.63    4.34
  -1   2  -6   10.53    9.02
  -1  -2   6   12.52    5.31
  -1   2  -6    4.81    8.23
   1  -2  -6    4.11    4.76
   1   2   6    4.72    6.88
   1  -2   6    6.25    8.56
  -1  -2  -6    7.97    8.76
  -1  -2  -6    3.70    5.43
  -1   2   6    8.82    8.53
   1   2  -6    4.53    4.39
  -1  -2  -6    5.86    8.79
   1   2  -6    6.09    8.26
   1  -2  -7 2200.64   89.69
   1  -2  -7 2365.56  100.37
  -1  -2   7 2226.01   92.43
  -1   2  -7 2328.03   97.31
   1   2   7 2579.24  107.76
  -1   2  -7 2399.55  101.52
  -1  -2   7 2753.39  113.92
  -1  -2  -7 2216.94   91.96
   1   2  -7 2534.94  104.33
  -1   2   7 2626.65  109.41
   1  -2   7 2077.21   87.95
   1   2  -7 2362.36   99.65
  -1  -2  -7 1968.84   82.32
   1  -2   7 2724.66  113.55
  -1  -2  -7 2449.21  103.37
  -1   2  -8   54.51   21.61
  -1  -2   8   61.51   10.24
  -1   2  -8   54.40   26.38
   1  -2  -8   72.07    8.97
   1  -2  -8   49.07   21.54
   1  -2  -8   64.22   13.21
  -1  -2   8   81.45   11.37
   1   2   8   71.95   15.10
  -1  -2  -8   71.66   15.42
  -1  -2  -8   55.26   12.72
  -1  -2  -8   76.07   18.78
   1   2  -8   84.64   12.92
  -1   2   8   74.70   13.96
   1  -2   8   54.96   10.70
   1   2  -8   61.40   11.51
   1  -2   8   87.67   18.04
  -1   2  -9  106.25   13.30
   1  -2  -9  112.58   21.10
  -1  -2   9  102.66   14.09
  -1  -2   9   83.62   12.06
   1  -2  -9  103.71   14.68
  -1   2  -9   81.54   39.99
  -1  -2  -9   89.68   11.82
   1  -2   9   99.98   18.67
  -1  -2  -9   91.23   12.90
  -1  -2  -9  111.89   24.12
   1   2  -9   99.78   15.54
   1   2  -9   98.91   14.55
   1  -2 -10   10.98   11.48
  -1  -2  10   14.44   10.06
  -1   2 -10   27.80   26.13
  -1  -2 -10   12.41    6.25
   1  -2  10    5.31    5.66
   1   2 -10    7.05    6.17
  -1  -2 -10    7.72    8.09
   1   2 -10   15.08   13.49
  -1  -2 -10   12.45    9.32
  -1  -2  11  220.99   24.89
   1  -2 -11  259.98   23.26
   1  -2 -11  256.70   16.33
  -1   2 -11  245.88   27.23
   1   2 -11  238.40   16.54
  -1  -2 -11  182.67   18.51
   1  -2  11  206.13   19.02
  -1  -2 -11  211.22   15.58
   1   2 -11  226.00   59.29
  -1  -2 -11  236.41   22.20
  -1   2 -12  493.57   41.03
  -1  -2  12  478.85   33.07
   1  -2 -12  476.72   30.67
   1  -2 -12  426.26   35.53
  -1  -2 -12  386.43   35.90
  -1  -2 -12  468.39   35.62
   1  -2  12  471.01   32.46
   1   2 -12  441.23   37.96
   1  -2 -13  572.64   30.85
  -1  -2  13  517.91   31.84
  -1   2 -13  562.44   40.24
   1  -2 -13  506.69   37.20
   1  -2  13  419.75   22.44
  -1  -2 -13  441.74   31.21
   1   2 -13  477.56   43.37
  -1  -2 -13  584.19   38.60
  -1  -2  14  253.91   21.69
  -1   2 -14  289.03   47.92
   1  -2  14  258.41   22.67
  -1  -2 -14  279.83   32.67
   1   2 -14  340.09   33.35
  -1  -2 -14  203.62   32.57
  -1  -2  15  380.10   25.24
   1  -2 -15  417.52   29.77
   1  -2 -15  376.59   51.04
  -1   2 -15  436.63   34.18
   1  -2  15  356.32   25.71
  -1  -2 -15  426.53   29.41
  -1  -2 -15  370.44   29.12
   1   2 -15  548.12   41.09
  -1  -2  16  647.45   37.07
   1  -2 -16  643.97   52.70
   1  -2 -16  513.49   37.64
  -1   2 -16  627.45   50.45
   1  -2  16  652.05   37.21
  -1  -2 -16  744.32   49.64
  -1  -2 -16  619.28   44.01
   1   2 -16  589.47   52.12
  -1  -2  17   21.77   11.84
   1  -2 -17   34.63   15.94
   1  -2 -17   10.15   11.65
  -1   2 -17   16.14    9.13
  -1  -2 -17   15.94   13.24
   1  -2  17   27.27   11.53
  -1  -2 -17   18.31   13.37
   1   2 -17   28.69   13.18
  -1  -2  18   18.73    8.64
   1  -2 -18   44.53   20.55
  -1   2 -18   19.39   19.67
   1  -2 -18   25.23   10.38
   1  -2  18    4.01    8.55
  -1  -2 -18    9.92    8.01
   1   2 -18   13.68    9.29
  -1  -2  19  303.84   26.21
  -1   2 -19  367.34   34.94
   1  -2 -19  378.32   39.35
   1  -2 -19  286.49   24.04
  -1  -2 -19  319.58   38.55
  -1  -2 -19  325.70   30.15
   1   2 -19  345.15   35.52
   1  -2  19  297.97   28.71
  -1  -2  20  149.83   16.07
  -1   2 -20  284.25   39.19
   1  -2 -20  201.69   24.41
   1  -2 -20  153.90   75.74
  -1  -2 -20  147.38   26.72
  -1  -2 -20  172.32   24.84
   1   2 -20  214.47   27.48
   1  -2  20  168.35   23.89
   1  -2 -21  351.24   36.45
  -1  -2  21  279.06   25.88
   1  -2 -21  359.19   53.51
  -1   2 -21  470.06   47.02
   1  -2  21  396.36   35.98
  -1  -2 -21  396.37   33.69
   1   2 -21  469.97   44.33
  -1  -2 -21  354.44   40.59
   1  -2 -22   17.20    8.72
  -1  -2  22   15.84   11.85
   1  -2 -22   20.93   15.88
   1  -2  22   24.90    7.29
  -1  -2 -22    9.00   18.18
  -1  -2 -22    6.02   10.93
   1   2 -22   14.72   18.71
   1  -2 -23  162.22   21.83
  -1  -2  23  159.13   19.18
   1  -2 -23  141.47   80.88
  -1   2 -23  166.60   31.55
  -1  -2 -23  156.83   27.76
   1  -2  23  132.20   19.32
  -1  -2 -23  170.33   46.81
   1   2 -23  196.53   37.47
  -1  -2  24  146.62   20.05
  -1   2 -24  171.87   32.41
   1  -2 -24  150.50   31.21
   1  -2 -24  150.76   28.46
  -1  -2 -24  127.70   23.43
  -1  -2 -24  158.63   29.62
   1   2 -24   85.67   52.39
   1  -2  24  152.69   19.39
  -1  -2  25   80.11   18.77
  -1   2 -25   62.37   37.58
   1  -2 -25  101.53   20.38
   1  -2 -25   50.57   17.36
   1  -2  25   87.92   17.17
   1   2 -25  115.57   23.82
  -1  -2 -25   85.42   19.72
  -1  -2 -25  163.77   29.86
  -1  -2  26   31.23    9.70
  -1   2 -26   21.17   21.25
   1  -2 -26   21.63   13.11
   1   2 -26   37.71   29.77
  -1  -2 -26    7.24   11.48
  -1  -2 -26   27.45   24.51
  -1   2 -27   17.60   12.48
  -1   2 -27   14.15   13.95
   1  -2 -27   12.07    8.11
  -1  -2 -27   24.71   18.12
  -1  -2 -27   18.59    8.16
   1   2 -27   41.82   30.78
  -1   2 -28   30.47   15.55
  -1   2 -28   28.45   22.67
   1  -2 -28   77.19   24.96
   1   2 -28   12.00   30.17
  -1  -2 -28   32.75   30.44
   1  -3   0   38.86   12.24
  -1  -3   0   13.15    9.06
   1   3   0    4.30    4.17
   1  -3   0    5.31    6.45
  -1  -3   0    4.72    4.91
   1   3   0    3.15    4.26
  -1   3   0    3.29    3.04
  -1   3  -1  452.80   21.57
   1   3   1  441.14   21.72
   1  -3  -1  449.84   20.53
   1   3   1  361.34   17.87
  -1  -3   1  458.71   22.52
  -1   3  -1  358.24   18.92
  -1  -3   1  372.47   18.33
   1  -3  -1  339.36   18.65
   1  -3   1  438.45   21.66
   1   3  -1  468.33   22.29
   1  -3   1  327.77   27.64
  -1  -3  -1  442.83   21.62
  -1   3   1  380.27   19.76
  -1  -3  -1  343.68   17.28
   1   3  -1  363.84   17.78
  -1   3   1  479.65   21.12
   1  -3  -2   37.45    7.85
  -1   3  -2   54.51    9.99
  -1   3  -2   33.65   10.96
  -1  -3   2   51.96   10.22
   1  -3  -2   52.35    7.47
  -1   3  -2   32.56    6.79
   1   3   2   41.01    8.86
   1   3   2   32.61    5.95
  -1  -3   2   34.11    5.66
  -1  -3  -2   44.57    6.54
  -1   3   2   43.05    4.76
  -1   3   2   35.73    8.28
  -1  -3  -2   28.06    5.81
   1   3  -2   43.58    8.62
   1   3  -2   41.72   10.51
   1  -3   2   48.04   14.98
   1  -3  -3 3042.47  123.26
  -1   3   3 3273.15  132.36
  -1  -3  -3 3026.90  122.20
   1  -3   3 3441.42  138.86
   1   3   4 1501.47   63.37
  -1  -3   4 1565.99   65.92
  -1   3  -4 1515.13   64.62
  -1  -3   4 1619.48   68.42
  -1   3  -4 1613.70   68.71
   1  -3  -4 1506.48   61.04
   1  -3  -4 1356.63   58.97
   1   3   4 1570.70   66.58
  -1  -3  -4 1507.12   63.44
   1  -3   4 1457.08   62.65
  -1   3   4 1536.04   65.66
  -1  -3  -4 1376.07   59.29
   1   3  -4 1549.25   65.12
  -1   3   4 1410.37   57.31
   1  -3   4 1581.92   67.68
   1   3  -4 1769.90   73.64
  -1   3  -5 1712.69   73.22
  -1   3  -5 1755.97   74.75
  -1  -3   5 1778.65   74.89
  -1  -3   5 1807.50   76.14
   1  -3  -5 1518.51   62.11
   1  -3  -5 1530.63   66.07
   1   3   5 1885.31   79.88
   1   3   5 1517.33   64.06
  -1  -3  -5 1607.95   68.62
  -1   3   5 1369.51   56.59
  -1   3   5 1730.12   74.01
  -1  -3  -5 1647.86   70.39
   1  -3   5 1557.76   66.89
   1   3  -5 1823.95   77.13
   1  -3   5 1811.59   77.34
   1   3  -5 1947.85   81.31
   1  -3  -6  322.43   19.54
  -1   3  -6  398.07   26.07
  -1   3  -6  454.25   52.20
  -1  -3   6  396.46   26.80
   1  -3  -6  325.06   18.55
   1   3   6  405.64   22.28
   1  -3  -6  319.31   22.85
   1   3   6  367.47   27.92
  -1  -3   6  469.78   29.69
   1   3  -6  428.66   23.24
  -1  -3  -6  401.86   23.60
  -1  -3  -6  387.84   24.24
  -1   3   6  454.75   26.55
   1  -3   6  407.77   24.94
   1  -3   6  369.05   22.71
   1   3  -6  348.39   23.82
   1  -3  -7  384.56   20.26
  -1  -3   7  424.42   28.62
  -1  -3   7  474.17   26.08
  -1   3  -7  506.91   64.12
   1  -3  -7  356.47   24.85
   1   3   7  525.61   30.44
   1  -3  -7  476.09   31.60
  -1   3  -7  561.54   33.67
   1   3  -7  532.30   27.60
  -1  -3  -7  401.25   25.67
  -1  -3  -7  402.46   32.13
  -1   3   7  531.25   30.01
   1   3  -7  434.26   31.64
   1  -3   7  406.90   53.78
   1  -3   7  553.08   31.55
  -1  -3   8 3222.20  135.27
   1  -3  -8 2564.25  106.33
  -1  -3   8 2798.79  118.02
   1  -3  -8 2919.29  123.78
   1  -3  -8 2384.20   99.12
  -1   3  -8 3008.70  126.87
  -1   3  -8 3117.76  131.92
   1   3   8 3116.32  132.06
  -1  -3  -8 2316.39   97.75
   1  -3   8 2688.38  114.45
   1   3  -8 3227.78  135.52
  -1   3   8 3265.75  137.63
  -1  -3  -8 2709.99  113.52
  -1  -3  -8 2630.06  112.67
   1   3  -8 3005.57  128.28
   1  -3  -9  674.45   38.16
   1  -3  -9  789.80   41.13
   1  -3  -9  886.39   50.17
  -1  -3   9  852.10   47.21
  -1   3  -9  743.73   49.60
   1   3  -9 1026.00   54.01
  -1  -3  -9  678.29   44.73
  -1  -3  -9  771.78   44.28
   1  -3   9  802.82   45.26
  -1  -3  -9  805.69   44.92
   1   3  -9  928.02   52.52
   1  -3 -10  508.05   28.46
   1  -3 -10  536.05   35.67
   1  -3 -10  589.53   31.85
  -1  -3  10  575.87   35.13
  -1   3 -10  521.81   37.57
  -1  -3 -10  511.10   40.35
  -1  -3 -10  609.19   35.52
   1  -3  10  571.45   35.57
  -1  -3 -10  627.68   41.47
   1   3 -10  602.27   51.09
   1   3 -10  684.98   39.26
  -1   3 -11   90.10   18.00
   1  -3 -11   97.91   10.52
  -1  -3  11   71.04   10.01
   1  -3 -11  107.68   21.57
   1  -3 -11   70.98   11.22
  -1  -3 -11   70.74    9.70
  -1  -3 -11   72.23   43.90
  -1  -3 -11  104.12   14.26
   1   3 -11   87.76   18.34
   1  -3  11   57.69   11.00
   1  -3 -12  750.31   42.14
  -1  -3  12  719.82   44.01
   1  -3 -12  683.96   40.07
   1  -3 -12  627.21   43.87
  -1   3 -12  763.09   49.66
   1  -3  12  688.73   44.24
  -1  -3 -12  539.97   34.13
  -1  -3 -12  742.53   46.54
   1   3 -12  663.37   71.69
   1  -3 -13    7.18    8.18
  -1  -3  13    9.61    6.11
   1  -3 -13    2.41    4.92
   1  -3 -13    7.60    7.26
  -1   3 -13    6.45    8.30
  -1  -3 -13    4.74    9.82
   1  -3 -14  950.66   38.72
  -1  -3  14 1058.28   39.51
   1  -3 -14 1224.41   47.79
   1  -3  14 1076.22   41.75
  -1  -3 -14 1154.24   52.79
  -1  -3 -14 1083.24   39.10
   1   3 -14 1299.08   50.25
   1  -3 -15   53.74   25.68
  -1  -3  15  103.91   13.96
   1  -3 -15   36.99   24.97
  -1   3 -15   83.17   19.52
   1  -3  15   61.35   12.24
  -1  -3 -15   40.31   24.44
   1   3 -15   90.93   56.08
  -1  -3 -15  106.65   44.22
  -1  -3  16  463.35   37.65
   1  -3 -16  439.37   33.01
   1  -3 -16  405.88   39.71
   1  -3  16  445.83   36.95
  -1  -3 -16  385.53   31.55
  -1  -3 -16  538.17   45.83
   1   3 -16  538.05   48.43
  -1   3 -17  122.14   23.48
  -1  -3  17  133.26   18.86
   1  -3 -17   41.76   31.60
   1  -3 -17  105.54   59.02
  -1  -3 -17   74.54   44.20
  -1  -3 -17  121.18   19.44
   1  -3  17  111.44   20.13
   1   3 -17  132.06   23.62
  -1  -3  18  688.48   45.94
   1  -3 -18  846.96   49.19
   1  -3 -18  588.47   51.43
  -1   3 -18  845.13   52.67
   1  -3  18  650.41   40.97
  -1  -3 -18  646.05   47.23
  -1  -3 -18  597.18   32.41
   1   3 -18  793.78   50.01
  -1  -3  19  163.47   17.81
   1  -3 -19  121.56   19.28
  -1   3 -19  213.30   33.01
   1  -3 -19  118.84   79.06
   1  -3  19  138.76   25.07
  -1  -3 -19  128.58   23.89
   1   3 -19  174.15   24.26
  -1  -3 -19  141.58   20.80
   1  -3 -20  638.59   37.20
  -1  -3  20  721.56   38.78
  -1  -3 -20  662.11   48.45
   1  -3  20  722.12   45.08
  -1  -3 -20  741.58   51.07
   1   3 -20  794.44   49.01
  -1  -3  21   32.41   13.65
  -1   3 -21   17.02   13.20
   1  -3 -21    8.97    9.26
   1  -3 -21    5.41    6.27
  -1  -3 -21    8.93    9.60
  -1  -3 -21   13.47   15.11
   1   3 -21   13.76   10.71
   1  -3  21   29.84   15.43
  -1  -3  22   10.67    7.96
   1  -3 -22    1.86   12.01
  -1   3 -22   16.26   17.07
   1  -3 -22   18.97   22.76
   1  -3  22   25.19    9.42
  -1  -3 -22   27.45   16.74
  -1  -3 -22    6.86    8.71
   1   3 -22   23.21   30.36
  -1  -3  23   18.38    8.95
   1  -3 -23   37.12   25.47
   1  -3 -23   14.36   17.08
  -1   3 -23   24.62   34.00
   1  -3  23   26.25    8.22
  -1  -3 -23   32.70   29.34
  -1  -3 -23    5.25    6.38
   1   3 -23   29.02   23.59
  -1  -3  24  132.79   18.94
   1  -3 -24  172.82   26.39
  -1   3 -24  202.70   45.05
   1  -3 -24  188.47   29.68
   1  -3  24  160.59   21.81
  -1  -3 -24  210.69   29.71
  -1  -3 -24  166.14   25.92
   1   3 -24  267.22   34.50
  -1   3 -25   24.37   21.30
  -1  -3  25   36.93   10.40
   1  -3 -25   14.42   16.60
   1  -3 -25   14.57   16.18
  -1  -3 -25   11.92    9.55
   1   3 -25   26.25   19.46
   1  -3  25   18.42   11.93
  -1  -3  26  275.15   35.32
   1  -3 -26  298.31   44.53
  -1   3 -26  242.92   35.61
   1  -3  26  202.16   28.01
   1   3 -26  332.84   53.75
  -1  -3 -26  185.47   28.01
  -1  -3 -26  312.35   46.09
  -1  -3  27   19.39   12.12
  -1   3 -27   23.67   26.50
   1  -3 -27    8.71   21.14
   1  -3  27   14.39   12.52
  -1  -3 -27    2.88    7.77
  -1  -3 -27    5.02    8.19
   1   3 -27   26.28   14.67
  -1   3 -28   14.32   20.42
   1  -3 -28   15.72   20.89
  -1   3 -28   10.35   11.56
  -1  -3 -28   19.51   16.13
   1   3 -28   25.70   20.17
   1  -4   0    1.53    2.76
  -1   4   0    5.81    4.13
  -1  -4   0    6.30    6.57
   1   4   0    5.16    3.74
  -1  -4   0    5.71    7.84
   1  -4   0   10.41    6.27
  -1   4   0    4.81    6.80
   1   4   0    2.55    5.13
  -1  -4   1  178.58   12.96
  -1  -4   1  117.64   13.09
  -1   4  -1  224.05   34.55
   1  -4  -1  158.16   10.90
   1   4   1  170.38   15.05
  -1   4  -1  108.26   12.78
   1   4   1  138.91   11.77
   1  -4  -1  115.54   11.89
   1   4  -1  170.06   13.59
   1   4  -1  100.32   11.07
  -1   4   1  135.89   13.61
  -1  -4  -1  147.96   14.53
   1  -4   1  126.21   17.68
  -1   4   1  105.65   13.38
  -1   4  -2   32.98   12.64
   1  -4  -2   40.79   12.24
  -1  -4   2   36.23    9.52
   1   4   2   42.65   10.75
   1  -4  -2   17.39    5.73
  -1   4  -2   24.97   16.57
   1   4   2   28.36    6.44
   1  -4   2   21.60    7.29
  -1  -4  -2   34.61   10.60
   1   4  -2   29.17   12.39
   1   4  -2   18.46    7.42
  -1   4   2   33.33   11.16
  -1  -4  -2   15.31    8.53
   1   4  -2   30.39    9.18
  -1   4  -4  993.48   45.69
  -1   4  -4 1043.78   46.62
  -1  -4   4 1024.09   46.23
   1   4   4  959.44   42.55
   1  -4  -4 1062.97   44.39
   1   4   4  955.23   43.57
   1  -4  -4  851.20   41.30
  -1  -4   4  966.62   43.88
   1   4  -4 1143.50   50.51
  -1  -4  -4  991.69   44.98
  -1   4   4  953.44   44.95
  -1  -4  -4  792.99   36.69
   1  -4   4  929.78   43.29
   1   4  -4  932.47   42.49
  -1   4   4  961.61   40.66
   1  -4   4  918.47   43.05
  -1   4  -5  761.79   37.78
  -1   4  -5  779.44   37.46
  -1  -4   5  734.49   36.54
   1   4   5  715.78   33.88
   1  -4  -5  732.61   33.62
  -1  -4   5  766.60   36.36
   1  -4  -5  594.91   32.01
   1   4   5  705.34   35.38
   1  -4   5  640.48   33.80
  -1   4   5  629.28   27.89
  -1  -4  -5  683.54   34.49
  -1  -4  -5  714.21   35.19
   1   4  -5  745.11   40.72
  -1   4   5  704.56   36.77
   1  -4   5  721.21   36.31
   1   4  -5  823.52   38.64
  -1   4  -6  558.75   32.56
  -1   4  -6  558.04   30.90
  -1  -4   6  551.78   31.02
  -1  -4   6  553.37   29.38
   1  -4  -6  458.51   22.39
   1   4   6  516.66   26.82
   1  -4  -6  514.41   31.29
   1   4   6  559.08   30.90
  -1  -4  -6  548.50   29.34
  -1   4   6  404.44   19.68
  -1  -4  -6  507.94   29.41
  -1   4   6  579.73   32.00
   1  -4   6  476.90   33.03
   1   4  -6  559.10   31.93
   1  -4   6  478.58   28.30
   1   4  -6  542.81   29.21
  -1   4  -7  831.77   41.98
  -1  -4   7  731.67   37.01
   1   4   7  814.80   41.20
   1   4   7  731.86   34.18
   1  -4  -7  648.09   34.50
  -1  -4   7  882.80   42.55
  -1   4  -7  731.58   40.11
   1  -4   7  709.43   37.11
   1   4  -7  821.19   39.80
  -1   4   7  573.87   26.74
  -1   4   7  789.07   39.67
  -1  -4  -7  706.01   34.36
   1   4  -7  827.97   40.77
   1  -4   7  818.55   40.43
  -1  -4  -7  731.23   38.10
   1  -4  -8  180.83   14.22
   1   4   8  278.90   25.35
  -1   4  -8  252.35   17.67
  -1  -4   8  252.37   33.01
   1  -4  -8  206.98   13.30
   1   4   8  249.87   18.09
   1  -4  -8  217.80   21.72
  -1  -4   8  298.52   23.44
   1   4  -8  304.10   21.93
   1  -4   8  206.09   22.48
  -1  -4  -8  229.35   30.08
   1   4  -8  237.26   21.32
  -1  -4  -8  234.05   22.78
  -1  -4   9  261.72   30.58
   1  -4  -9  258.02   17.70
   1  -4  -9  233.23   18.03
  -1   4  -9  311.49   29.74
   1  -4  -9  269.27   24.66
   1  -4   9  294.35   23.46
  -1  -4  -9  259.36   20.69
   1   4  -9  325.08   26.47
  -1  -4  -9  249.65   19.75
  -1  -4  -9  296.93   23.18
   1   4  -9  261.63   39.18
   1  -4 -10 1040.26   54.25
   1  -4 -10 1123.70   63.17
  -1  -4  10 1196.69   57.09
  -1   4 -10 1224.59   70.38
   1  -4 -10 1081.60   56.59
  -1  -4 -10  980.30   62.68
  -1  -4 -10 1167.87   64.91
  -1  -4 -10 1171.88   55.42
   1   4 -10 1097.92   68.67
   1  -4  10 1079.26   61.18
   1  -4 -11   17.58    8.68
  -1  -4  11   10.94    4.93
   1  -4 -11    1.12    5.39
  -1   4 -11   14.17   12.07
   1  -4 -11    7.71   11.31
  -1  -4 -11   14.20    8.39
   1  -4  11   22.51    9.58
  -1  -4 -11   18.18   11.79
  -1  -4 -11    5.16    6.34
   1   4 -11   10.78    9.17
   1  -4 -12    5.31    5.50
  -1  -4  12    1.63    3.97
   1  -4 -12    8.07    5.89
  -1   4 -12   22.07   17.78
   1  -4 -12    2.50    8.38
   1  -4  12   33.40   16.96
  -1  -4 -12   11.66    7.53
   1   4 -12   13.24   15.32
  -1  -4 -12    3.95   10.88
  -1  -4  13  314.11   32.87
   1  -4 -13  408.32   25.93
   1  -4 -13  316.10   23.08
   1  -4 -13  294.93   30.73
  -1   4 -13  347.43   36.99
   1  -4  13  318.17   40.10
  -1  -4 -13  311.04   22.79
  -1  -4 -13  345.67   29.42
   1   4 -13  368.77   39.56
   1  -4 -14  384.59   21.31
  -1   4 -14  399.90   34.78
  -1  -4  14  337.51   30.09
   1  -4 -14  332.75   27.08
   1  -4 -14  389.04   33.25
  -1  -4 -14  337.65   29.35
  -1  -4 -14  381.97   27.16
   1  -4  14  373.03   28.33
   1   4 -14  424.71   33.60
  -1   4 -15  685.49   69.95
  -1  -4  15  608.16   35.91
   1  -4 -15  483.34   29.65
   1  -4 -15  524.36   39.76
  -1  -4 -15  494.98   35.12
  -1  -4 -15  580.30   37.59
   1  -4  15  457.31   47.14
   1   4 -15  590.19   41.35
  -1   4 -16  148.07   35.16
  -1  -4  16  132.27   15.23
   1  -4 -16  103.56   57.30
   1  -4 -16   97.45   16.21
  -1  -4 -16  117.59   54.45
  -1  -4 -16   89.72   26.68
   1  -4  16  107.76   21.14
   1   4 -16   97.47   24.18
  -1   4 -17   24.94   16.74
  -1  -4  17   28.18    9.27
   1  -4 -17   29.60   13.12
   1  -4 -17   31.04   28.68
  -1  -4 -17   25.26   21.82
  -1  -4 -17   50.55   16.60
   1  -4  17   47.46   14.27
   1   4 -17   39.97   16.47
  -1  -4  18   69.97   14.61
  -1   4 -18   97.34   21.82
   1  -4 -18   41.15   15.77
   1  -4 -18   49.10   31.16
  -1  -4 -18   43.96   22.13
  -1  -4 -18   35.06   22.96
   1   4 -18   24.53   20.94
   1  -4  18   47.93   20.89
  -1  -4  19  363.12   34.88
   1  -4 -19  569.61   50.13
   1  -4 -19  340.38   26.19
  -1   4 -19  526.76   43.08
  -1  -4 -19  515.85   35.23
   1  -4  19  350.85   32.84
  -1  -4 -19  399.18   38.72
   1   4 -19  492.71   43.26
  -1  -4  20   90.14   15.72
  -1   4 -20   71.51   31.18
   1  -4 -20   88.09   36.67
   1  -4 -20   46.84   25.44
  -1  -4 -20  238.15  214.76
  -1  -4 -20   77.91   14.42
   1   4 -20   86.85   22.05
   1  -4  20   54.06   14.82
  -1  -4  21  515.97   35.03
   1  -4 -21  582.78   36.77
   1  -4 -21  687.44   51.25
  -1   4 -21  741.04   56.34
   1  -4  21  657.42   42.93
  -1  -4 -21  655.56   36.37
  -1  -4 -21  793.12   54.37
   1   4 -21  797.23   53.52
  -1  -4  22   34.00   10.93
  -1   4 -22   38.04   18.77
   1  -4 -22   17.10   12.91
   1  -4 -22   35.75   22.60
  -1  -4 -22   24.89   19.48
  -1  -4 -22   29.00   19.86
   1   4 -22   41.41   26.39
   1  -4  22   35.59   10.28
  -1  -4  23   76.13   15.54
   1  -4 -23  140.20   23.54
   1  -4 -23  129.47   29.03
  -1   4 -23  137.47   37.31
   1  -4  23   93.74   19.24
  -1  -4 -23  122.56   38.53
  -1  -4 -23  106.76   23.58
   1   4 -23  111.20   26.88
  -1  -4  24   37.58   11.98
   1  -4 -24   19.03   28.11
   1  -4 -24   46.50   26.01
  -1   4 -24   24.82   27.88
   1  -4  24   59.58   15.34
  -1  -4 -24   31.52   22.26
  -1  -4 -24   42.69   25.83
   1   4 -24  115.65   33.12
   1  -4 -25   43.90   20.85
  -1  -4  25   48.11   15.62
  -1   4 -25   41.43   28.21
   1  -4  25   73.83   17.46
  -1  -4 -25   53.60   23.81
  -1  -4 -25   90.67   16.48
   1   4 -25   35.91   22.34
  -1   4 -26   61.83   35.58
  -1  -4  26   93.35   18.71
   1  -4 -26   43.38   41.34
  -1  -4 -26   52.57   25.12
  -1  -4 -26   64.78   29.38
   1   4 -26   53.85   30.71
   1  -4  26   44.23   14.64
   1  -4 -27    9.61   15.78
  -1  -4  27   10.43    9.78
  -1   4 -27    9.70   12.23
   1  -4  27   33.14   18.74
   1   4 -27   23.00    7.71
  -1  -4 -27   20.05   23.94
   1  -4 -28   95.08   32.46
  -1  -4  28   31.53   12.47
  -1   4 -28   50.20   31.37
   1  -4  28   42.73   20.95
   1   4 -28   12.68   18.55
  -1  -4 -28   43.60   34.66
   1  -5   0    9.42    6.07
  -1   5   0    8.26    6.73
  -1  -5   0    9.92    8.65
   1   5   0   10.58   10.87
   1  -5   0    3.03    3.93
  -1  -5   0    0.77    3.29
  -1   5   0    9.00   13.15
   1   5   0    5.27    8.20
  -1  -5   1 5011.22  201.21
  -1   5  -1 3897.60  157.87
   1  -5  -1 3758.52  152.33
   1   5   1 3929.76  158.25
  -1  -5  -1 3939.43  159.99
   1  -5   1 3786.35  153.51
   1  -5  -2   13.01    7.49
   1  -5  -2   30.53    8.27
  -1  -5   2   12.97    8.82
  -1   5  -2   24.92   12.28
   1   5   2    9.49    9.04
  -1   5  -2   16.85   14.79
   1   5   2   12.67   11.51
   1   5  -2   22.66   15.11
  -1  -5  -2   31.15   11.64
  -1   5   2   18.23    8.32
   1   5  -2   18.94    8.79
   1  -5   2   31.46   10.37
  -1  -5  -2   26.12    8.02
   1  -5   2   20.53    8.65
  -1   5   2   26.56   19.35
  -1   5  -3  519.74   26.88
   1   5   3  472.11   25.38
   1  -5  -3  597.53   27.42
  -1   5  -3  399.88   27.70
  -1  -5   3  537.04   57.64
  -1   5  -3  410.64   28.66
   1   5   3  519.50   27.10
   1  -5  -3  361.32   26.10
  -1  -5  -3  527.55   27.65
  -1   5   3  563.90   27.10
   1   5  -3  601.22   32.68
  -1  -5  -3  440.02   24.81
  -1   5   3  459.94   28.81
   1  -5   3  491.17   35.14
   1   5  -3  377.74   27.12
   1   5  -3  418.81   30.00
  -1  -5   4  788.16   38.13
  -1   5  -4  907.16   53.47
  -1  -5   4  685.56   33.95
   1  -5  -4  685.01   36.46
   1  -5  -4  861.39   37.62
   1   5   4  747.85   36.87
  -1   5  -4  733.19   38.28
   1   5   4  853.71   39.26
  -1  -5  -4  659.98   33.95
   1   5  -4  932.30   43.46
  -1   5   4  797.95   39.04
  -1   5   4  852.69   37.47
  -1  -5  -4  830.22   39.54
   1   5  -4  739.99   36.66
   1  -5   4  786.02   38.95
  -1  -5   5  118.92   10.70
  -1  -5   5  133.29   16.46
  -1   5  -5  139.61   22.45
  -1   5  -5  137.49   14.52
   1  -5  -5  130.82    9.56
   1   5   5  131.83   21.34
   1   5   5  122.32   11.25
   1  -5  -5  118.99   16.56
  -1   5   5  138.12   16.23
  -1  -5  -5   94.42   14.86
  -1   5   5   96.25   11.56
  -1  -5  -5  131.77   23.56
   1  -5   5  126.52   19.10
   1   5  -5  130.02   16.40
   1  -5   5   81.95   11.36
   1   5  -5  130.89   16.25
  -1  -5   6 1482.02   65.07
  -1  -5   6 1431.33   64.15
  -1   5  -6 1519.12   67.13
   1   5   6 1411.69   63.79
   1  -5  -6 1238.09   56.72
   1   5   6 1358.01   58.92
  -1   5  -6 1393.03   64.60
  -1   5   6 1203.04   51.15
  -1  -5  -6 1427.79   62.40
   1   5  -6 1556.37   68.98
  -1   5   6 1402.97   62.62
   1   5  -6 1464.56   65.36
   1  -5   6 1237.76   56.50
   1  -5   6 1475.65   65.72
  -1  -5  -6 1226.96   57.29
  -1  -5   7 2807.41  118.69
  -1  -5   7 2808.43  119.53
   1  -5  -7 2787.81  114.91
  -1   5  -7 2785.73  119.34
   1   5   7 2540.82  106.76
   1  -5  -7 2512.99  108.14
   1   5   7 2873.66  122.70
   1   5  -7 3216.08  136.13
  -1   5   7 2241.31   93.03
  -1  -5  -7 2513.65  108.02
  -1  -5  -7 2785.11  116.62
   1   5  -7 2959.00  125.60
   1  -5   7 2713.86  115.98
   1  -5  -8 1592.98   74.52
  -1  -5   8 1660.28   74.65
   1  -5  -8 1652.48   70.32
  -1   5  -8 1918.08   86.57
   1   5   8 1652.75   72.07
  -1   5   8 1523.15   65.15
   1  -5   8 1648.06   75.61
  -1  -5  -8 1603.45   72.93
   1   5  -8 1753.55   81.09
  -1  -5  -8 1683.14   73.88
   1  -5  -9 2707.21  112.06
   1  -5  -9 2741.28  113.54
  -1  -5   9 2951.78  126.13
  -1   5  -9 3322.73  142.04
   1   5   9 2842.34  119.40
   1  -5  -9 2731.07  118.70
   1  -5   9 2800.23  120.72
  -1  -5  -9 2867.06  123.65
   1   5  -9 3241.84  138.47
  -1  -5  -9 2967.75  125.04
   1  -5 -10  370.54   22.96
  -1  -5  10  373.51   21.84
   1  -5 -10  339.61   21.07
  -1   5 -10  320.10   26.31
   1  -5 -10  408.66   32.00
   1  -5  10  343.44   47.51
  -1  -5 -10  336.61   26.00
  -1  -5 -10  345.47   19.35
   1   5 -10  449.70   34.57
   1  -5 -11  556.99   32.36
  -1  -5  11  489.58   32.98
   1  -5 -11  535.17   40.36
   1  -5 -11  470.06   29.29
  -1   5 -11  488.59   47.10
   1  -5  11  571.97   39.42
  -1  -5 -11  537.28   37.52
  -1  -5 -11  434.49   31.32
   1   5 -11  586.20   42.20
   1  -5 -12  346.10   22.69
  -1  -5  12  321.80   25.87
   1  -5 -12  311.28   24.18
  -1   5 -12  333.99   27.52
   1  -5 -12  322.53   39.01
   1  -5  12  365.85   28.30
  -1  -5 -12  261.40   23.92
  -1  -5 -12  313.60   26.80
   1   5 -12  352.57   56.67
   1  -5 -13 1625.22   73.03
  -1   5 -13 1707.06   84.73
  -1  -5  13 1651.74   79.17
   1  -5 -13 1601.53   96.07
   1  -5 -13 1577.95   71.22
  -1  -5 -13 1524.70  111.87
  -1  -5 -13 1637.45   76.51
   1  -5  13 1428.69   70.95
   1   5 -13 1806.22   87.16
   1  -5 -14  378.05   37.16
  -1  -5  14  325.36   29.62
   1  -5 -14  405.84   23.02
   1  -5 -14  294.36   23.63
  -1   5 -14  490.53   46.80
  -1  -5 -14  306.01   18.38
   1  -5  14  386.81   28.57
   1   5 -14  366.88   46.29
  -1  -5 -14  342.15   29.21
   1  -5 -15  332.00   30.58
  -1  -5  15  317.97   28.50
   1  -5 -15  345.47   38.49
  -1   5 -15  369.49   41.82
  -1  -5 -15  384.75   34.56
   1  -5  15  393.05   34.88
  -1  -5 -15  332.38   31.24
   1   5 -15  368.12  110.21
  -1   5 -16  177.60   31.90
  -1  -5  16  174.00   27.38
   1  -5 -16  132.97   17.41
   1  -5 -16  164.87   57.47
  -1  -5 -16   96.05   46.88
  -1  -5 -16  140.11   22.57
   1  -5  16  141.26   30.78
   1   5 -16  174.04   43.63
  -1   5 -17  792.61   47.41
  -1  -5  17  872.17   47.84
   1  -5 -17  958.98   54.19
   1  -5 -17  790.97   40.44
  -1  -5 -17  886.19   53.96
  -1  -5 -17  753.65   50.79
   1  -5  17  857.38   57.59
   1   5 -17  978.39   57.90
  -1   5 -18   32.10   19.49
  -1  -5  18   18.09   11.51
   1  -5 -18    3.95    6.12
   1  -5 -18   16.03   16.29
  -1  -5 -18    9.64   17.25
  -1  -5 -18   22.80   19.03
   1  -5  18   46.18   19.85
   1   5 -18   37.75   27.13
  -1   5 -19  932.09   57.33
  -1  -5  19  885.02   52.62
   1  -5 -19  970.53   46.33
   1  -5 -19  936.49   56.43
  -1  -5 -19  727.86   45.04
  -1  -5 -19  900.87   51.12
   1  -5  19  756.52   47.08
   1   5 -19 1041.06   59.07
   1  -5 -20  233.78   23.45
  -1  -5  20  308.46   31.63
   1  -5 -20  302.45   38.34
  -1   5 -20  357.29   44.53
   1  -5  20  194.96   23.65
  -1  -5 -20  303.49   26.93
   1   5 -20  299.00   37.36
  -1  -5 -20  231.40   45.07
  -1  -5  21  134.37   19.19
   1  -5 -21   93.13   22.02
   1  -5 -21   86.05   16.63
  -1   5 -21  122.93   28.24
   1  -5  21  109.67   18.93
  -1  -5 -21  103.82   22.54
  -1  -5 -21  109.79   17.84
   1   5 -21  141.77   25.87
  -1  -5  22   16.78    5.01
  -1   5 -22   22.48   22.95
   1  -5 -22   12.27    7.61
   1  -5 -22   17.58   13.03
  -1  -5 -22    7.53   10.53
  -1  -5 -22   18.61   17.60
   1   5 -22   13.01   11.73
   1  -5  22   33.19   12.46
  -1   5 -23   43.82   28.86
  -1  -5  23   57.90   13.95
   1  -5 -23   43.58   22.77
   1  -5 -23   33.13   20.34
  -1  -5 -23   74.46   35.78
  -1  -5 -23   32.12   19.82
   1  -5  23   66.60   19.31
   1   5 -23   33.70   24.70
   1  -5 -24  230.52   38.81
  -1  -5  24  200.35   25.77
  -1   5 -24  191.45   32.10
   1  -5  24  160.15   24.82
  -1  -5 -24  255.65   42.60
  -1  -5 -24  173.28   30.08
   1   5 -24  247.05   37.60
  -1  -5  25  468.04   44.92
  -1   5 -25  714.62   69.04
   1  -5 -25  755.44   72.66
   1  -5  25  530.82   56.61
  -1  -5 -25  713.50   67.65
  -1  -5 -25  485.18   46.96
   1   5 -25  604.35   63.88
  -1  -5  26   17.07    5.66
  -1   5 -26   12.92   28.79
   1  -5 -26   39.14   27.92
   1   5 -26   20.20   21.43
   1  -5  26   51.59   18.32
  -1  -5  27  164.35   26.38
   1  -5 -27  185.35   45.68
  -1   5 -27  214.35   35.81
   1  -5  27  148.68   24.21
  -1  -5 -27  228.34   32.70
   1   5 -27  231.47   38.49
  -1   6   0    9.60    6.74
  -1  -6   0   16.92   13.68
   1   6   0    8.71    7.41
   1  -6   0   11.41    8.94
  -1  -6   0    7.91   10.31
  -1   6   0   10.61    8.35
   1   6   0    3.89    6.25
   1   6   1  219.58   26.14
   1  -6  -1  208.30   27.34
  -1  -6   1  326.13   48.60
   1  -6  -1  398.22  168.66
  -1   6  -1  373.51   21.66
  -1   6  -1  248.30   20.93
   1   6   1  359.07   44.44
  -1  -6   1  245.47   22.66
   1   6  -1  331.52   38.48
   1  -6   1  235.62   21.63
  -1   6   1  209.58   17.45
  -1  -6  -1  332.95   23.30
   1  -6   1  332.22   22.24
  -1   6   1  399.51   21.49
   1   6  -1  225.91   23.03
  -1  -6  -1  212.87   18.40
   1   6   2   90.12   11.66
   1  -6  -2  113.90   12.62
  -1   6  -2   64.83   11.45
  -1  -6   2   81.46   14.19
  -1   6  -2  119.64   15.01
  -1  -6   2   58.54   18.38
   1   6   2   77.99   13.17
   1  -6  -2   73.87   13.73
   1   6  -2   76.49   12.64
   1  -6   2  121.51   14.74
   1   6  -2   72.33   15.07
  -1   6   2   87.62    9.89
  -1  -6  -2   62.82   11.14
  -1  -6  -2   94.39   11.86
  -1   6   2   64.25   11.44
   1  -6   2   55.89   12.59
   1   6   3   15.75    9.98
  -1   6  -3   13.44    7.69
  -1  -6   3    6.55    5.72
   1  -6  -3   11.85    4.39
   1  -6  -3    9.05    7.82
  -1   6  -3   10.52    6.71
   1   6   3    6.82    7.53
  -1   6  -3    2.82    6.63
  -1   6   3    3.23    6.23
   1   6  -3   11.52    9.90
   1   6  -3   14.51    9.53
  -1  -6  -3   20.00   15.06
  -1  -6  -3   13.59    9.81
  -1   6   3    3.44    6.97
   1   6  -3    7.80    6.87
   1  -6   3    7.18    5.40
   1   6   4 3082.67  126.37
  -1   6  -4 3207.52  132.28
  -1  -6   4 3084.75  128.16
  -1   6  -4 2617.61  109.41
   1  -6  -4 3215.17  130.73
  -1   6  -4 2683.75  112.64
   1   6   4 2754.04  114.62
   1  -6  -4 2397.89  101.47
   1  -6   4 2812.32  117.34
  -1  -6  -4 3097.55  127.50
   1   6  -4 3401.20  139.89
  -1  -6  -4 2338.85   98.15
  -1   6   4 2759.49  114.95
  -1   6   4 3076.45  124.91
   1   6  -4 2564.54  107.24
   1   6  -4 2856.82  118.14
  -1  -6   5 1014.57   54.90
  -1   6  -5 1066.12   56.50
  -1  -6   5  977.84   51.78
  -1   6  -5  909.76   50.21
   1  -6  -5 1093.65   55.57
   1   6   5  914.65   50.07
   1   6   5  996.71   51.48
   1  -6  -5  850.53   47.57
   1   6  -5 1099.36   57.88
  -1   6   5  928.39   51.03
  -1  -6  -5  783.54   45.30
  -1  -6  -5  960.02   50.62
  -1   6   5  908.91   46.37
   1   6  -5  966.86   51.94
   1  -6   5  862.18   47.72
   1  -6  -6   12.39    9.36
   1  -6  -6    4.08    5.21
  -1   6  -6   17.62   14.54
   1   6   6    6.38    4.41
   1   6   6    1.74    6.28
   1  -6   6   11.19    6.86
  -1  -6  -6    6.74    5.06
  -1  -6  -6   13.04    5.83
   1   6  -6    6.89    9.55
   1   6  -6    2.32    4.62
  -1   6   6    3.14    3.44
   1  -6   6    4.85    6.54
   1  -6  -7  108.54   18.50
  -1  -6   7  117.96   13.11
   1  -6  -7  113.29   10.02
  -1   6  -7  124.85   20.01
   1   6   7   90.67   10.76
  -1   6   7   91.91   16.07
   1  -6   7  146.61   20.71
  -1  -6  -7  115.07   13.71
   1   6  -7  131.38   16.78
  -1  -6  -7  111.99   12.98
   1  -6  -8  928.67   53.56
  -1  -6   8 1056.44   57.71
   1  -6  -8 1090.46   54.76
  -1   6  -8 1121.49   62.08
   1   6   8 1017.15   23.40
  -1   6   8  965.66   49.01
   1  -6   8 1005.48   56.41
  -1  -6  -8 1045.99   32.06
   1   6  -8 1139.78   62.20
  -1  -6  -8 1052.22   55.59
   1  -6  -9 1589.79   69.17
  -1  -6   9 1448.00   69.31
  -1   6  -9 1540.44   72.73
   1   6   9 1256.11   57.36
   1  -6  -9 1366.16   66.81
  -1  -6  -9 1470.17   67.03
  -1   6   9 1173.83   52.10
   1  -6   9 1419.06   67.89
   1   6  -9 1511.11   70.91
  -1  -6  -9 1333.15   63.87
   1  -6 -10 1086.96   64.41
  -1  -6  10 1276.52   71.83
   1  -6 -10 1185.96   63.23
   1   6  10 1062.30   58.08
  -1   6 -10 1199.80   67.82
  -1  -6 -10 1260.97   58.49
  -1  -6 -10 1236.97   61.33
   1  -6  10 1136.84   64.04
   1   6 -10 1256.77   71.81
   1  -6 -11   12.88    8.09
  -1  -6  11   17.28   15.56
  -1   6 -11    4.91   11.85
   1  -6 -11    5.44    7.10
   1  -6 -11   15.84   14.09
  -1  -6 -11   15.66   23.54
  -1  -6 -11   39.34   46.32
   1   6 -11   18.35   17.39
   1  -6  11    8.74    7.41
   1  -6 -12    1.14    5.25
  -1   6 -12    3.76    9.87
  -1  -6  12   14.72    9.74
   1  -6 -12    8.64    7.41
   1  -6 -12   10.36   17.04
  -1  -6 -12    2.21    3.13
  -1  -6 -12    4.46    8.50
   1  -6  12   23.05   10.84
   1   6 -12    7.33   13.32
   1  -6 -13  743.22   32.72
  -1  -6  13  829.41   43.56
   1  -6 -13  863.52   37.14
   1  -6 -13  829.50   46.34
  -1   6 -13  935.33   50.85
   1  -6  13  795.39   43.72
  -1  -6 -13  834.24   39.85
  -1  -6 -13  771.53   43.87
   1   6 -13 1031.50   43.05
   1  -6 -14  215.82   14.75
   1  -6 -14  185.30   23.02
  -1  -6  14  209.95   24.30
   1  -6 -14  195.25   22.34
  -1   6 -14  180.89   40.12
   1  -6  14  215.22   26.10
  -1  -6 -14  223.79   22.25
   1   6 -14  240.59   29.69
  -1  -6 -14  218.68   29.18
  -1  -6  15   13.32   11.80
   1  -6 -15    8.56    7.43
  -1   6 -15   10.55   22.77
   1  -6 -15   14.76   10.69
   1  -6  15   12.41   12.74
  -1  -6 -15    4.11    6.95
   1   6 -15   19.07   16.00
  -1  -6 -15   21.44    9.87
  -1  -6  16   66.14   18.67
   1  -6 -16   64.57   11.95
  -1   6 -16   60.72   59.67
   1  -6 -16   67.84   30.17
   1  -6  16   64.36   19.79
  -1  -6 -16   84.58   40.68
  -1  -6 -16   55.83   12.22
   1   6 -16   59.44   34.27
  -1  -6  17  192.09   20.79
   1  -6 -17  203.36   43.33
   1  -6 -17  167.58   20.25
  -1   6 -17  124.38   47.70
   1  -6  17  193.16   22.13
  -1  -6 -17  237.95   45.39
  -1  -6 -17  145.76   17.42
   1   6 -17  222.57   29.27
  -1   6 -18   54.72   37.22
  -1  -6  18   57.12   18.28
   1  -6 -18   71.51   19.67
   1  -6 -18   90.76   25.65
  -1  -6 -18   80.50   14.62
  -1  -6 -18   51.82   29.91
   1  -6  18   90.16   17.29
   1   6 -18   55.86   34.21
  -1  -6  19   23.75   14.61
   1  -6 -19   14.93   11.72
  -1   6 -19   16.17   16.84
   1  -6 -19   11.45   12.50
   1  -6  19   25.19   15.40
  -1  -6 -19   23.48   15.94
   1   6 -19   18.10    9.63
  -1  -6 -19   23.96   27.16
   1  -6 -20  345.41   31.90
  -1  -6  20  327.30   32.75
   1  -6 -20  329.89   35.63
  -1   6 -20  332.74   39.51
  -1  -6 -20  333.88   31.35
   1  -6  20  392.94   40.50
  -1  -6 -20  459.95   43.63
   1   6 -20  380.58   41.85
  -1  -6  21   28.89    6.16
  -1   6 -21    3.41   11.37
   1  -6 -21   12.15   10.13
   1  -6 -21   31.14   18.75
  -1  -6 -21   10.02    5.82
  -1  -6 -21   33.99   12.06
   1   6 -21   16.05   10.46
   1  -6  21   45.59   20.70
  -1  -6  22   92.88   17.54
   1  -6 -22  103.78   26.04
   1  -6 -22   82.22   18.01
  -1   6 -22   57.60   51.79
   1  -6  22  118.30   21.28
  -1  -6 -22   95.70   22.36
  -1  -6 -22   83.87   23.26
   1   6 -22   52.83   31.91
  -1   6 -23   24.43   15.65
  -1  -6  23   23.77   11.09
   1  -6 -23   11.46   12.95
   1  -6 -23    5.34   18.84
  -1  -6 -23   22.39   12.60
  -1  -6 -23   29.48   17.83
   1  -6  23   25.87   17.83
   1   6 -23   25.44   24.89
  -1   6 -24   52.90   18.11
  -1  -6  24  105.81   26.12
   1  -6 -24   92.51   25.20
  -1  -6 -24   55.06   19.96
  -1  -6 -24   72.15   25.35
   1   6 -24   44.11   25.97
   1  -6  24   79.34   18.12
  -1  -6  25   39.89   13.34
   1  -6 -25   22.38   20.68
  -1   6 -25   13.11   12.62
  -1  -6 -25   75.51   20.47
   1  -6  25   48.73   25.68
  -1  -6 -25   18.40   18.94
   1   6 -25   28.51   36.90
   1  -6 -26   53.77   41.43
  -1  -6  26   82.44   18.00
  -1   6 -26   25.88   23.00
   1  -6  26   44.92   12.56
   1   6 -26   95.29   33.22
  -1  -6 -26   73.09   27.16
  -1  -6  27   40.38   17.66
   1  -6 -27   53.93   33.58
  -1   6 -27   25.95   45.59
   1  -6  27   70.34   19.18
  -1  -6 -27   58.29   26.40
   1   6 -27   54.16   46.80
  -1  -7   0   11.31    9.42
   1  -7   0   13.76    7.52
  -1   7   0    2.59    2.84
   1   7   0    5.19    6.65
   1  -7   0   14.55   15.05
  -1  -7   0    4.37    5.87
   1   7   0    4.93    9.35
  -1   7   0   10.50    7.45
   1   7   1 1170.74   25.98
   1   7   1  886.72   43.13
   1  -7  -1 1124.43   53.44
  -1   7  -1 1191.28   25.98
  -1  -7   1 1147.22   53.11
   1  -7  -1  800.51   41.40
  -1   7  -1  845.73   24.47
  -1  -7   1  805.91   39.77
   1   7  -1 1205.63   54.30
   1  -7   1 1160.29   52.43
  -1  -7  -1  852.72   24.92
  -1   7   1 1219.67   53.49
  -1   7   1  919.17   43.95
  -1  -7  -1 1204.97   29.68
   1   7  -1  887.36   42.70
   1  -7   1  914.96   45.06
   1  -7  -2  192.65   20.78
  -1  -7   2  287.02   29.65
  -1  -7   2  202.32   26.90
  -1   7  -2  377.24   22.62
   1  -7  -2  275.11   21.45
   1   7   2  324.15   21.02
  -1   7  -2  216.15   17.90
   1   7   2  210.57   24.69
   1   7  -2  356.41   25.35
   1   7  -2  218.68   17.48
  -1  -7  -2  321.66   22.12
  -1   7   2  306.39   18.44
   1  -7   2  293.05   22.98
  -1   7   2  244.10   21.33
  -1  -7  -2  179.13   19.79
   1  -7   2  217.48   19.95
   1  -7  -3 4400.53  182.64
  -1  -7   3 5762.83  237.14
  -1   7  -3 6024.64  246.65
  -1   7  -3 4745.54  196.19
  -1   7  -3 4798.19  198.35
   1   7   3 4777.87  196.96
  -1  -7  -3 4355.54  180.23
   1  -7   3 5274.80  217.11
  -1   7   3 4822.94  199.20
   1   7  -3 4815.32  198.41
  -1  -7   4 3025.99  129.34
   1  -7  -4 2241.01   97.79
   1  -7  -4 3029.33  125.64
   1   7   4 2660.12  113.48
   1   7   4 3053.50  127.84
  -1   7  -4 2559.09  109.80
  -1   7   4 3096.73  128.57
   1   7  -4 2516.51  107.78
   1  -7   4 2754.94  117.85
  -1  -7  -4 2979.96  125.87
   1   7  -4 2710.52  115.44
  -1  -7  -4 2216.61   95.73
  -1  -7   5  265.07   38.03
   1  -7  -5  180.85   18.06
   1  -7  -5  271.84   13.72
   1   7   5  279.19   20.23
   1   7   5  206.01   18.82
  -1   7  -5  230.09   19.28
  -1  -7  -5  284.60   22.13
   1   7  -5  198.14   19.03
  -1   7   5  235.50   17.32
  -1  -7  -5  207.47   20.64
   1  -7   5  239.81   19.41
   1   7  -5  214.39   17.24
  -1  -7   6  762.92   45.40
   1  -7  -6  552.20   36.44
   1  -7  -6  766.16   40.47
   1   7   6  698.56   38.77
  -1   7  -6  654.36   52.08
  -1  -7  -6  780.06   43.40
  -1   7   6  724.02   38.40
  -1  -7  -6  616.28   37.72
   1  -7   6  695.01   43.15
   1   7  -6  626.12   41.64
  -1   7  -7 4007.25  168.66
  -1  -7   7 4107.29  173.02
   1  -7  -7 3519.41  150.76
  -1  -7  -7 4349.77  180.11
  -1   7   7 3938.38  161.79
  -1  -7  -7 3453.74  146.28
   1  -7   7 3908.54  166.11
   1   7  -7 4302.76  180.18
  -1   7  -8 3822.27  162.46
  -1  -7   8 3812.43  162.47
   1  -7  -8 4188.75  172.61
   1   7   8 3628.67  151.75
   1  -7  -8 3254.22  140.28
   1  -7   8 3524.41  151.43
  -1   7   8 3486.62  144.41
  -1  -7  -8 3293.92  140.90
   1   7  -8 4027.45  169.94
  -1  -7  -8 3948.98  165.30
  -1  -7   9 1579.23   74.48
   1  -7  -9 1531.25   67.20
   1  -7  -9 1451.17   70.22
   1   7   9 1500.39   67.50
  -1   7  -9 1548.01   77.44
   1  -7   9 1514.04   72.26
  -1  -7  -9 1498.67   67.85
  -1  -7  -9 1473.53   72.55
  -1   7   9 1252.40   55.36
   1   7  -9 1528.21   72.45
   1  -7 -10  282.56   27.17
  -1  -7  10  306.46   36.52
  -1   7 -10  307.65   27.88
   1  -7 -10  309.02   21.54
  -1   7  10  267.35   17.00
  -1  -7 -10  268.49   25.57
   1  -7  10  255.16   23.17
   1   7 -10  278.94   26.64
  -1  -7 -10  348.60   25.16
  -1  -7  11  102.36   18.56
   1  -7 -11  102.93   21.75
   1  -7 -11  100.53   15.84
  -1   7 -11  116.51   18.71
   1  -7  11  100.85   15.00
  -1  -7 -11   61.54   25.86
  -1  -7 -11  105.62   14.73
   1   7 -11   87.28   18.70
   1  -7 -12  440.87   23.33
  -1  -7  12  513.62   32.34
  -1   7 -12  518.41   38.78
   1  -7 -12  496.01   25.23
   1  -7 -12  389.29   39.04
  -1  -7 -12  467.76   29.71
  -1  -7 -12  418.54   35.77
   1   7 -12  566.30   37.72
   1  -7  12  496.80   34.42
   1  -7 -13  227.54   15.52
  -1  -7  13  242.58   30.41
   1  -7 -13  191.65   25.45
   1  -7 -13  239.66   27.35
  -1   7 -13  245.76   30.42
   1  -7  13  253.32   42.14
  -1  -7 -13  178.76   24.94
  -1  -7 -13  215.88   22.50
   1   7 -13  243.97   29.25
  -1  -7  14  502.80   42.25
   1  -7 -14  674.85   44.92
  -1   7 -14  608.11   52.11
   1  -7  14  497.17   40.62
  -1  -7 -14  596.14   42.61
  -1  -7 -14  503.49   41.73
   1   7 -14  641.09   53.02
  -1   7 -15  107.27   17.94
  -1  -7  15  139.38   19.70
   1  -7 -15   79.60   19.32
   1  -7 -15  134.97   23.71
  -1  -7 -15   96.20   15.46
  -1  -7 -15  162.87   20.28
   1  -7  15  147.72   19.71
   1   7 -15  131.87   23.05
  -1  -7  16   85.55   18.02
  -1   7 -16   96.76   24.03
   1  -7 -16   76.83   26.38
   1  -7 -16   95.19   20.74
  -1  -7 -16   64.87   14.17
  -1  -7 -16   63.31   27.66
   1   7 -16  105.94   31.44
   1  -7  16  100.47   19.51
  -1  -7  17  155.42   20.49
  -1   7 -17  158.79   28.59
   1  -7 -17  141.60   16.65
   1  -7 -17  106.23   17.13
  -1  -7 -17  150.54   17.68
  -1  -7 -17  185.24   25.55
   1   7 -17  121.83   29.50
   1  -7  17  159.49   26.05
  -1  -7  18  280.70   33.01
   1  -7 -18  260.98   28.32
   1  -7 -18  223.72   23.10
  -1   7 -18  266.32   43.35
  -1  -7 -18  224.87   49.95
   1  -7  18  251.12   31.13
  -1  -7 -18  225.40   30.03
   1  -7 -19 1819.25   64.25
  -1  -7  19 1816.10   75.63
   1  -7 -19 1763.00   75.33
  -1   7 -19 2306.52   66.59
  -1  -7 -19 2043.40   48.32
   1  -7  19 1815.11   59.64
  -1  -7 -19 1932.23   84.73
   1   7 -19 2105.21   88.59
   1  -7 -20  307.88   97.19
  -1  -7  20  444.69   41.38
   1  -7 -20  468.77   41.50
  -1   7 -20  441.82   43.13
  -1  -7 -20  348.04   89.50
   1  -7  20  395.44   49.10
  -1  -7 -20  373.34   42.69
   1   7 -20  473.60   51.79
   1  -7 -21  179.66   28.08
  -1  -7  21  189.86   32.02
   1  -7 -21  236.19   31.02
  -1   7 -21  239.16   30.86
  -1  -7 -21  217.05   28.19
   1  -7  21  176.15   27.34
  -1  -7 -21  209.62   27.75
   1   7 -21  274.64   40.94
  -1   7 -22   39.12   26.87
  -1  -7  22   69.28   18.18
   1  -7 -22   36.35   17.89
   1  -7 -22   32.02   29.15
  -1  -7 -22   72.42   24.69
  -1  -7 -22   39.36   33.63
   1  -7  22   47.87   18.53
   1   7 -22   87.89   24.25
  -1  -7  23   19.89   10.51
  -1   7 -23   33.78   20.80
   1  -7 -23    8.17   11.89
   1  -7  23   43.32   15.00
  -1  -7 -23    4.21   11.44
  -1  -7 -23   18.72   16.29
   1   7 -23   24.54   24.22
   1  -7 -24   27.19   30.41
  -1  -7  24  105.25   24.79
  -1   7 -24  109.57   28.78
   1  -7  24   71.84   15.69
  -1  -7 -24   83.36   27.55
  -1  -7 -24   56.08   24.17
   1   7 -24  112.90   43.39
  -1  -7  25  498.66   47.46
   1  -7 -25  571.91   56.86
  -1   7 -25  528.49   56.82
   1  -7  25  420.88   45.36
  -1  -7 -25  574.11   55.56
   1   7 -25  452.46   55.03
  -1  -7  26  406.82   55.31
   1  -7 -26  420.51   64.71
  -1   7 -26  482.55   67.62
   1  -7  26  507.77   66.79
  -1  -7 -26  416.84   62.89
   1   7 -26  626.96   83.96
   1  -7 -27   73.22   36.64
  -1  -7  27   63.15   21.78
  -1   7 -27   34.65   14.50
  -1  -7 -27   49.23   25.81
   1  -7  27   46.44   19.83
   1   7 -27   93.27   23.40
  -1   8   0    2.36    4.14
   1  -8   0   17.42    7.11
   1   8   0    6.63    4.30
  -1  -8   0    2.03    6.39
   1   8   0    8.67    8.85
   1   8   1   39.41   14.41
  -1  -8   1   40.01   11.51
   1  -8  -1   39.04   25.40
  -1  -8   1   48.23   14.77
  -1   8  -1   58.31    9.17
   1   8   1   16.75   19.21
   1  -8  -1   21.28   11.16
  -1  -8  -1   49.78   11.53
  -1  -8  -1   20.64   11.57
   1  -8   1   49.27   18.27
   1  -8   1   15.98   12.65
  -1   8   1   59.32   10.93
   1   8  -1   44.72    9.96
   1   8   2    3.87    7.09
   1  -8  -2    2.05    3.50
  -1   8  -2    9.79    3.62
  -1  -8   2   12.53   11.07
   1  -8  -2    8.79    9.17
   1   8   2    9.52    4.40
  -1  -8   2    7.02   10.02
  -1   8   2    7.13    5.81
   1   8  -2   16.57   14.25
   1  -8   2    7.57    4.99
  -1  -8  -2   18.92   10.20
  -1  -8  -2   17.30    9.53
   1  -8   2   10.50   10.67
  -1  -8   3  245.77   62.46
   1  -8  -3  193.50   15.84
   1  -8  -3  133.57   20.08
   1   8   3  183.24   23.21
   1  -8   3  197.53   24.97
  -1  -8  -3  213.07   23.03
  -1  -8  -3  157.24   14.89
  -1   8   3  192.82   21.88
   1   8  -3  155.58   14.18
   1  -8  -4   20.73   18.28
  -1  -8   4   27.08   18.77
   1  -8  -4   27.72   14.30
  -1   8  -4   16.40    9.39
   1   8   4   20.30   10.73
  -1   8   4   19.11   14.13
   1  -8   4   42.30   19.94
  -1  -8  -4   37.14    9.76
   1   8  -4   35.27   16.51
  -1  -8  -4   38.19   11.53
  -1  -8   5  241.82   34.48
   1  -8  -5  178.90   26.31
   1  -8  -5  277.63   15.23
   1   8   5  266.01   20.63
  -1   8  -5  198.83   21.34
  -1  -8  -5  256.74   18.42
  -1  -8  -5  216.73   21.86
   1  -8   5  248.48   22.62
  -1   8   5  238.17   16.40
   1   8  -5  193.66   22.25
   1  -8  -6  456.76   46.61
  -1  -8   6  681.22   43.57
   1  -8  -6  769.73   42.99
   1   8   6  686.09   39.29
  -1   8  -6  656.98   42.43
  -1  -8  -6  765.28   44.55
   1  -8   6  687.39   43.31
  -1  -8  -6  533.53   35.45
  -1   8   6  741.89   41.44
   1   8  -6  693.90   42.42
   1  -8  -7  449.59   17.65
  -1  -8   7  405.46   30.44
   1   8   7  337.94   21.73
  -1   8  -7  318.63   24.79
   1  -8  -7  331.58   25.88
  -1  -8  -7  412.12   23.24
   1  -8   7  387.67   23.96
  -1   8   7  394.14   27.01
   1   8  -7  413.29   30.26
  -1  -8  -7  296.20   26.57
   1  -8  -8  107.83   19.86
  -1  -8   8  121.17   17.55
   1  -8  -8  168.08   15.68
  -1   8  -8   98.47   14.14
  -1  -8  -8  132.02   17.26
  -1  -8  -8  140.73   19.89
   1  -8   8  147.45   22.66
  -1   8   8  141.43   12.58
   1   8  -8  115.39   14.00
  -1  -8   9  842.84   46.33
   1  -8  -9  820.07   41.03
   1  -8  -9  686.82   41.52
  -1   8  -9  769.70   44.95
   1  -8   9  797.07   45.70
  -1  -8  -9  884.20   45.91
  -1   8   9  742.02   36.57
  -1  -8  -9  774.01   45.34
   1   8  -9  824.40   49.92
   1  -8 -10   23.65   11.87
  -1  -8  10   14.99   10.70
   1  -8 -10   14.96   12.18
  -1   8 -10   19.52   14.70
  -1  -8 -10   11.85    5.41
  -1  -8 -10   19.30    8.49
   1  -8  10   19.66   17.19
  -1   8  10    6.74    8.83
   1   8 -10   13.35   13.27
  -1  -8  11   28.33   11.79
   1  -8 -11   15.40    7.39
  -1   8 -11   12.84   11.95
   1  -8 -11   18.09   21.87
   1  -8  11   21.27   17.21
  -1  -8 -11   13.73   10.11
  -1  -8 -11   26.10   23.09
  -1   8  11   33.92   10.31
   1   8 -11   27.36   11.56
   1  -8 -12  307.44   29.77
  -1  -8  12  349.10   32.04
   1  -8 -12  276.73   27.19
  -1   8 -12  301.44   33.71
   1  -8  12  275.52   40.78
  -1  -8 -12  306.91   22.19
   1   8 -12  323.12   33.64
  -1  -8 -12  256.07   24.90
   1  -8 -13 1292.35   52.18
  -1  -8  13 1469.29   65.45
   1  -8 -13 1435.54   56.39
  -1   8 -13 1555.48   70.31
   1  -8 -13 1347.93   63.28
   1  -8  13 1383.70   62.88
  -1  -8 -13 1602.49   65.48
   1   8 -13 1564.74   75.63
  -1  -8 -13 1310.13   62.77
   1  -8 -14   57.56   11.95
  -1  -8  14   43.34   12.23
   1  -8 -14   64.57   21.93
  -1   8 -14   45.75   19.31
  -1  -8 -14   98.38   20.35
   1  -8  14   89.01   22.81
  -1  -8 -14   53.93   21.72
   1   8 -14   39.59   25.35
  -1  -8  15   24.94   19.04
   1  -8 -15   14.94   10.54
   1  -8 -15   17.53    8.80
  -1   8 -15   43.40   26.96
   1  -8  15   35.00   12.86
  -1  -8 -15   18.69   16.07
  -1  -8 -15   14.45   12.09
  -1   8 -16   10.34   11.55
  -1  -8  16   13.24   12.25
   1  -8 -16   34.36   12.85
   1  -8 -16   14.38   16.10
  -1  -8 -16   10.21    8.21
  -1  -8 -16    6.63   10.29
   1  -8  16   33.28   16.99
  -1  -8  17  142.45   23.09
  -1   8 -17  106.15   42.82
   1  -8 -17  104.23   16.13
   1  -8 -17  111.89   19.15
  -1  -8 -17  114.85   19.72
  -1  -8 -17   85.82   17.76
   1   8 -17  146.56   50.26
   1  -8  17   83.93   26.83
  -1  -8  18   17.24   12.42
  -1   8 -18   12.52   17.02
   1  -8 -18   12.07    6.47
   1  -8 -18   19.29   10.93
  -1  -8 -18   13.35   19.93
  -1  -8 -18   21.19   16.63
   1   8 -18   39.00   23.87
   1  -8  18   19.05   12.78
  -1  -8  19  191.73   28.80
  -1   8 -19  235.17   30.63
   1  -8 -19  214.03   20.08
   1  -8 -19  191.68   23.89
  -1  -8 -19  245.67   30.56
  -1  -8 -19  197.51   34.07
   1   8 -19  220.76   45.29
   1  -8  19  177.20   24.65
   1  -8 -20   11.83   10.51
  -1  -8  20   33.00   18.96
   1  -8 -20   31.58   24.85
  -1   8 -20   29.04   30.02
   1  -8  20   36.15   12.50
  -1  -8 -20   11.04    9.23
   1   8 -20   14.18   25.62
  -1  -8 -20   31.23   19.88
   1  -8 -21    7.03   14.16
  -1  -8  21   12.26   12.34
   1  -8 -21   18.80   16.62
  -1   8 -21   18.82   20.43
   1  -8  21   40.04   11.69
  -1  -8 -21   11.95   13.61
   1   8 -21   23.17   10.67
  -1  -8 -21    5.99    4.31
  -1   8 -22   33.28   20.08
  -1  -8  22   13.11    6.80
   1  -8 -22   18.27   21.57
  -1  -8 -22   25.70   21.36
  -1  -8 -22   29.17   19.95
   1   8 -22   17.54   16.66
   1  -8  22   37.92   14.45
  -1  -8  23    9.49    8.50
   1  -8 -23   28.27   18.96
  -1   8 -23   22.04   10.65
  -1  -8 -23    3.93    8.78
   1  -8  23    5.82    9.56
   1   8 -23    9.44   12.02
  -1  -8 -23   12.51   12.48
   1  -8 -24   36.33   40.81
  -1  -8  24   39.59   14.51
  -1   8 -24   47.70   25.19
   1  -8  24   42.93   20.77
   1   8 -24   45.33   30.44
  -1  -8 -24   27.16   23.15
  -1  -8  25  158.28   30.03
  -1   8 -25  305.13   58.18
   1  -8 -25  202.49   49.25
  -1  -8 -25  202.34   29.47
   1  -8  25  196.95   30.31
   1   8 -25  256.45   40.15
  -1  -8  26   14.19    7.30
   1  -8 -26   12.97   27.04
  -1   8 -26   32.74   21.57
   1  -8  26   33.03   21.43
  -1  -8 -26   35.91   25.14
   1  -9   0   15.40   13.35
  -1  -9   0    8.49    8.57
  -1  -9   0    5.14    4.61
   1  -9   0   11.31   10.16
  -1  -9   1    7.96    8.20
   1  -9  -1    7.76    7.53
  -1  -9   1   10.25    8.84
   1  -9  -1    6.13   12.82
   1  -9   1   17.48   13.43
  -1  -9  -1   20.93    7.10
  -1  -9  -1    7.50    9.77
  -1   9   1    4.29    4.84
   1  -9   1    9.67    5.91
   1  -9  -2 2933.20  124.11
  -1  -9   2 2838.92  122.96
  -1  -9   2 2337.13  101.90
   1  -9  -2 2065.17  106.68
   1  -9   2 2866.47  123.17
  -1  -9  -2 2817.62  121.15
   1  -9   2 2165.16   96.92
  -1   9   2 3207.77  134.31
  -1  -9  -2 2138.35   94.87
  -1  -9   3  538.98   36.95
   1  -9  -3  537.40   33.65
   1  -9  -3  351.35   32.84
   1  -9   3  506.04   34.32
  -1  -9  -3  635.68   40.09
   1  -9   3  395.43   34.45
  -1  -9  -3  369.51   30.51
  -1   9   3  539.13   32.05
   1   9  -3  370.94   32.40
   1  -9  -4  382.16   30.68
  -1  -9   4  546.85   37.00
   1  -9  -4  529.53   33.13
  -1   9  -4  391.45   31.85
  -1  -9  -4  581.06   36.68
  -1   9   4  594.83   34.79
   1  -9   4  548.92   36.91
   1   9  -4  509.41   34.33
  -1  -9  -4  463.73   32.75
  -1  -9   5   19.06    7.42
  -1   9  -5   21.17   12.99
   1  -9  -5   56.24   14.66
   1  -9  -5   22.92   10.19
  -1  -9  -5   36.92   11.08
  -1   9   5   13.88    6.86
  -1  -9  -5   30.04   13.50
   1  -9   5   53.96   13.55
   1   9  -5   12.60   13.84
  -1  -9   6  100.30   21.43
   1  -9  -6   88.09    9.96
   1  -9  -6   70.17   15.61
  -1   9  -6   97.14   15.30
   1  -9   6  111.27   19.51
  -1  -9  -6   98.94   13.15
  -1   9   6   93.59   13.22
  -1  -9  -6   54.86   24.82
   1   9  -6   68.49   12.54
  -1  -9   7  111.90   21.35
  -1   9  -7   75.96   16.86
   1  -9  -7   55.19   13.54
   1  -9  -7  128.47   14.19
  -1   9   7  101.26   10.76
  -1  -9  -7  112.28   14.55
  -1  -9  -7  105.11   24.22
   1  -9   7  153.23   18.91
   1   9  -7  103.75   20.95
  -1  -9   8 2468.33  111.91
  -1   9  -8 2636.33  119.90
   1  -9  -8 2763.53  119.47
   1  -9  -8 2140.66   99.86
   1  -9   8 2507.07  114.32
  -1   9   8 2298.13  100.69
  -1  -9  -8 1936.31   90.62
   1   9  -8 2460.84  111.98
  -1  -9  -8 2691.83  118.66
  -1  -9   9  106.68   18.22
   1  -9  -9   92.35   10.05
  -1   9  -9   85.31   18.18
   1  -9  -9   81.14   19.55
   1  -9   9   95.68   19.87
  -1  -9  -9   79.73   15.76
  -1  -9  -9   70.73   17.79
  -1   9   9   95.02   10.72
   1   9  -9   65.01   23.93
   1  -9 -10  618.40   30.15
  -1  -9  10  640.11   40.17
   1  -9 -10  505.01   37.94
  -1   9 -10  512.91   36.29
   1  -9  10  610.45   40.68
  -1  -9 -10  639.40   33.60
  -1  -9 -10  471.32   33.95
  -1   9  10  536.89   26.67
   1   9 -10  643.59   37.95
   1  -9 -11  171.41   23.71
  -1  -9  11  236.38   71.49
   1  -9 -11  230.63   27.06
  -1   9 -11  200.31   24.01
  -1  -9 -11  218.39   18.50
  -1  -9 -11  183.91   29.94
   1  -9  11  200.41   23.53
  -1   9  11  171.64   15.70
   1   9 -11  198.41   22.36
  -1  -9  12  170.97   24.64
  -1   9 -12  165.66   21.64
   1  -9 -12  178.95   16.66
   1  -9 -12  139.70   18.77
  -1  -9 -12  230.39   18.20
  -1   9  12  154.03   14.14
  -1  -9 -12  162.65   18.99
   1  -9  12  197.20   31.23
   1   9 -12  178.19   25.49
  -1   9 -13 1271.36   62.86
  -1  -9  13 1076.10   55.54
   1  -9 -13 1325.10   54.44
   1  -9 -13 1033.42   74.55
  -1  -9 -13 1281.29   57.40
  -1  -9 -13 1078.47   54.05
   1  -9  13 1178.14   59.11
  -1  -9  14 1240.16   62.65
   1  -9 -14 1090.62   60.79
   1  -9 -14 1354.21   58.89
  -1   9 -14 1451.81   70.69
   1  -9  14 1176.69   62.12
  -1  -9 -14 1302.74   65.32
  -1  -9 -14 1225.49   57.26
   1   9 -14 1480.09   72.26
  -1  -9  15  277.57   43.64
   1  -9 -15  216.33   29.33
   1  -9 -15  235.00   21.72
  -1   9 -15  255.00   37.63
  -1  -9 -15  242.75   21.71
   1   9 -15  205.69   51.83
  -1  -9 -15  197.97   55.36
  -1   9 -16  343.27   37.71
  -1  -9  16  351.86   32.55
   1  -9 -16  332.58   28.95
   1  -9 -16  324.75   31.72
  -1  -9 -16  402.94   29.73
  -1  -9 -16  400.37   35.56
   1  -9  16  389.03   39.74
   1   9 -16  410.74   36.46
  -1  -9  17   73.79   19.09
   1  -9 -17   52.54   11.46
  -1   9 -17   84.67   31.52
   1  -9 -17   47.83   30.76
   1  -9  17   42.42   17.80
  -1  -9 -17   58.76   18.82
  -1  -9 -17   68.53   15.83
   1   9 -17   56.56   27.36
  -1   9 -18  342.24   48.96
  -1  -9  18  474.51   38.84
   1  -9 -18  281.47   38.07
   1  -9 -18  522.36   34.64
  -1  -9 -18  378.74   37.17
  -1  -9 -18  363.86   36.54
   1  -9  18  449.82   40.62
   1   9 -18  433.18   44.28
  -1  -9  19   95.68   24.02
   1  -9 -19   76.53   21.18
   1  -9 -19  115.57   31.92
  -1   9 -19   72.50   26.16
  -1  -9 -19  109.31   28.71
  -1  -9 -19   51.86   28.01
   1   9 -19   90.74   27.58
  -1  -9  20  253.86   27.75
  -1   9 -20  312.21   58.40
   1  -9 -20  355.81   25.91
   1  -9 -20  307.87   35.64
  -1  -9 -20  305.10   38.66
  -1  -9 -20  292.45   31.91
   1   9 -20  248.90   38.70
   1  -9  20  253.62   27.84
   1  -9 -21    5.91   16.03
  -1  -9  21   24.98   11.14
  -1   9 -21   24.42   33.05
   1  -9  21   26.72    7.28
  -1  -9 -21   11.84    7.56
  -1  -9 -21    3.69    9.58
   1   9 -21   28.28   20.67
   1  -9 -22   15.61   15.17
  -1  -9  22   13.71    8.20
  -1   9 -22   15.37   19.70
   1  -9  22   44.86   25.77
   1   9 -22   15.83   17.73
  -1  -9 -22   18.15   18.64
  -1  -9  23   44.74   16.87
  -1   9 -23   21.97   18.62
   1  -9 -23   15.67   15.58
   1  -9  23   24.51   16.72
  -1  -9 -23   10.60   18.98
  -1  -9 -23   34.02   19.18
   1   9 -23   18.12   25.00
  -1  -9  24  206.80   27.61
  -1   9 -24  301.41   45.77
   1  -9 -24  202.42   33.01
   1  -9  24  319.66   42.57
   1   9 -24  244.71   41.75
  -1  -9 -24  261.77   37.70
  -1  -9  25  167.37   29.88
  -1   9 -25  219.44   54.07
   1  -9 -25  186.53   34.28
  -1  -9 -25  262.92   32.77
   1  -9  25  143.18   28.57
   1   9 -25  218.74   45.60
   1  -9 -26  592.95   68.18
  -1  -9  26  511.66   51.37
  -1   9 -26  748.56   74.96
   1  -9  26  479.27   54.99
   1   9 -26  591.09   62.83
  -1  -9 -26  606.87   64.90
   1 -10   0   18.71   10.10
  -1 -10   0    2.93    7.38
   1 -10   0   11.31   12.15
  -1 -10   0    3.20    4.67
   1 -10  -1    9.42    9.83
  -1 -10   1    5.99   11.23
   1 -10  -1   26.78    9.16
   1 -10   1   13.38    6.43
  -1 -10  -1   31.62   14.84
   1 -10   1    5.54    7.12
  -1 -10  -1   18.56   15.07
   1 -10  -2   37.22    8.42
  -1 -10   2   11.70   12.45
   1 -10  -2   18.68   15.34
  -1 -10   2    1.53    8.37
   1 -10   2   30.56   19.44
  -1 -10  -2   25.67   18.33
  -1 -10  -2   22.60   12.60
   1 -10   2   15.55    8.27
   1 -10  -3  364.00   22.77
  -1 -10   3  320.59   39.15
   1 -10  -3  225.30   18.62
   1 -10   3  300.10   38.88
  -1 -10  -3  259.38   23.00
  -1 -10  -3  315.23   22.47
  -1 -10   4  677.44   44.53
  -1  10  -4  544.22   44.70
   1 -10  -4  661.27   39.65
   1 -10  -4  535.97   38.27
  -1 -10  -4  734.52   43.93
  -1 -10  -4  406.30   33.60
   1  10  -4  512.92   35.54
   1 -10   4  552.96   35.93
  -1 -10   5  325.11   24.57
  -1  10  -5  223.22   40.62
   1 -10  -5  350.38   24.87
   1 -10  -5  235.34   21.22
  -1 -10  -5  284.68   19.03
  -1  10   5  300.69   27.67
  -1 -10  -5  235.48   23.15
   1 -10   5  295.83   42.55
   1  10  -5  206.73   20.64
  -1 -10   6  113.48   20.56
  -1  10  -6   79.76   40.30
   1 -10  -6   98.58    9.76
   1 -10  -6   52.86   20.50
  -1 -10  -6   83.16   29.53
  -1  10   6   62.97   10.86
  -1 -10  -6   84.36   14.88
   1 -10   6  102.08   22.86
   1  10  -6   70.45   40.60
  -1 -10   7  499.63   51.12
   1 -10  -7  571.93   22.07
   1 -10  -7  459.18   33.74
  -1  10  -7  422.23   35.91
   1 -10   7  492.24   33.52
  -1  10   7  525.37   30.11
  -1 -10  -7  502.76   32.56
   1  10  -7  400.04   28.97
  -1 -10  -7  389.82   30.42
  -1 -10   8  117.56   24.42
   1 -10  -8  145.38   15.13
   1 -10  -8   81.77   14.67
  -1  10  -8  126.84   17.66
   1 -10   8  127.12   22.29
  -1 -10  -8  132.09   28.83
  -1  10   8  131.86   13.79
  -1 -10  -8   96.76   18.92
   1  10  -8  123.20   34.28
  -1  10  -9  876.86   46.15
  -1 -10   9  773.79   47.19
   1 -10  -9  838.05   39.71
   1 -10  -9  602.40   37.37
  -1 -10  -9  850.41   41.17
  -1 -10  -9  722.72   42.26
   1 -10   9  834.32   46.13
   1  10  -9  837.31   44.63
  -1 -10  10  599.08   36.00
   1 -10 -10  707.57   35.01
   1 -10 -10  486.85   32.11
  -1  10 -10  708.16   43.56
   1 -10  10  560.96   38.85
  -1 -10 -10  620.18   33.18
  -1 -10 -10  571.70   40.11
   1  10 -10  589.65   41.44
   1 -10 -11    8.41    7.16
  -1 -10  11   12.60   14.73
  -1  10 -11   17.45   15.87
   1 -10 -11   24.39   12.44
   1 -10  11   20.44   14.49
  -1  10  11    6.51    6.90
  -1 -10 -11   11.20    8.81
   1  10 -11   17.17   19.94
  -1 -10 -11    8.27    9.34
  -1 -10  12  463.83   39.48
   1 -10 -12  441.86   31.97
   1 -10 -12  421.68   37.51
  -1  10 -12  432.84   41.83
   1 -10  12  539.02   44.85
  -1 -10 -12  546.34   42.40
  -1 -10 -12  448.44   38.71
   1  10 -12  478.53   42.75
  -1 -10  13  359.15   33.16
   1 -10 -13  309.35   27.57
   1 -10 -13  316.37   22.60
  -1  10 -13  349.47   33.04
  -1 -10 -13  347.69   33.26
   1 -10  13  274.34   33.59
  -1 -10 -13  286.59   26.66
   1  10 -13  332.34   38.01
  -1 -10  14  654.36   42.33
   1 -10 -14  802.34   37.79
   1 -10 -14  530.94   42.78
  -1  10 -14  660.10   48.16
   1 -10  14  690.89   44.74
  -1 -10 -14  655.47   44.39
  -1 -10 -14  542.19   44.21
   1  10 -14  752.84   48.71
  -1 -10  15   37.31   29.85
   1 -10 -15   19.45   14.03
   1 -10 -15   32.89   15.22
   1 -10  15   33.58   11.34
  -1 -10 -15   60.78   20.58
  -1 -10 -15   28.59   18.87
   1  10 -15   20.28   28.29
  -1  10 -16  233.90  148.05
  -1 -10  16   20.95   18.18
   1 -10 -16   12.27   10.52
   1 -10 -16    1.10    5.40
  -1 -10 -16   17.22   12.89
  -1 -10 -16    9.24    9.54
   1 -10  16   27.31   10.79
   1  10 -16   18.74   19.94
  -1 -10  17   81.61   16.52
   1 -10 -17   74.41   12.55
  -1  10 -17   78.37   30.80
   1 -10 -17   95.03   21.10
   1 -10  17   69.68   18.43
  -1 -10 -17   84.45   19.29
   1  10 -17   60.86   29.91
  -1 -10 -17   56.95   12.01
  -1 -10  18   20.70    8.07
   1 -10 -18   32.29   14.52
   1 -10 -18   16.25   13.79
   1 -10  18   16.81   10.70
  -1 -10 -18   17.00   17.44
  -1 -10 -18   29.06   21.69
   1  10 -18   11.94   28.22
  -1 -10  19  271.28   32.95
   1 -10 -19  216.27   19.10
  -1  10 -19  187.14   41.12
   1 -10 -19  164.49   37.13
   1 -10  19  223.14   36.48
  -1 -10 -19  193.75   24.07
   1  10 -19  224.65   34.39
  -1 -10 -19  166.80   29.59
  -1 -10  20   20.89   10.09
  -1  10 -20   16.75   16.48
   1 -10 -20   10.03    8.85
   1 -10 -20   18.47   11.41
  -1 -10 -20   12.92   17.79
  -1 -10 -20    2.91    7.83
   1  10 -20   23.65   20.60
   1 -10  20   18.18    9.38
  -1 -10  21   26.95   15.49
   1 -10 -21   30.94   22.87
  -1  10 -21   39.99   30.44
   1 -10  21   33.66   23.17
  -1 -10 -21   21.76   16.78
  -1 -10 -21   30.98   24.04
   1  10 -21   30.17   22.40
  -1  10 -22   33.16   23.48
  -1 -10  22   17.54   11.28
   1 -10 -22   20.44   20.94
  -1 -10 -22   15.19   13.00
  -1 -10 -22    6.80   15.18
   1  10 -22   42.33   35.92
   1 -10  22   27.31   12.91
  -1 -10  23   20.15   19.85
   1 -10 -23   10.48    7.59
  -1  10 -23   27.75   34.89
   1 -10  23   24.66   13.59
  -1 -10 -23   12.19   19.63
   1  10 -23   26.28   24.11
   1 -10 -24   28.80   17.55
  -1 -10  24   30.54   12.07
  -1  10 -24   32.05   29.15
  -1 -10 -24   13.07   11.44
   1 -10  24   11.14   12.77
  -1 -10  25   17.99    8.22
  -1  10 -25   24.68   15.28
   1 -10 -25   44.43   41.23
  -1 -10 -25   23.49   20.47
   1 -10  25   62.90   21.37
   1  10 -25   23.68   20.17
  -1 -10  26   77.28   23.07
  -1  10 -26   69.72   31.67
   1 -10 -26   99.28   37.39
   1 -10  26   78.25   19.59
   1  10 -26   42.84   37.49
  -1 -10 -26  100.11   48.46
   1 -11   0   18.57   11.35
  -1 -11   0   14.92   11.54
  -1 -11   0   21.86   12.18
   1 -11   0    8.30    6.30
  -1 -11   1  581.75   35.88
   1 -11  -1  575.62   34.21
   1 -11  -1  384.90   29.53
  -1 -11   1  503.76   33.00
   1 -11   1  579.33   36.03
  -1 -11  -1  645.05   38.15
   1 -11   1  542.17   36.11
  -1 -11  -1  510.25   33.86
   1 -11  -2   82.23   12.00
  -1 -11   2   97.33   17.70
   1 -11  -2  108.43   20.78
  -1 -11   2   91.38   18.41
  -1 -11  -2  126.83   21.81
  -1 -11  -2   61.24   15.28
   1 -11   2  122.25   18.88
   1 -11   2  101.72   13.42
   1 -11  -3  977.91   52.28
   1 -11  -3 1286.74   62.53
  -1 -11   3 1221.02   63.99
  -1 -11  -3 1287.67   64.84
   1 -11   3 1036.24   54.59
  -1 -11  -3  878.36   47.93
   1 -11   3 1217.82   61.52
  -1 -11   4   29.19   19.61
   1 -11  -4   14.29    8.47
   1 -11  -4    9.58   11.11
  -1  11  -4   10.91   10.82
  -1 -11  -4   23.47   13.00
   1 -11   4   22.31   15.75
  -1 -11  -4   24.41    6.42
   1  11  -4   34.58   18.77
  -1 -11   5 1515.32   75.46
  -1  11  -5 1317.18   67.91
   1 -11  -5 1612.79   75.25
   1 -11  -5 1161.52   60.04
  -1 -11  -5 1582.78   75.52
  -1 -11  -5 1048.90   56.16
   1  11  -5 1211.66   68.03
   1 -11   5 1400.66   71.57
  -1  11  -6   24.97   16.69
  -1 -11   6   39.10   17.54
   1 -11  -6   68.10   16.40
   1 -11  -6   28.27   15.09
  -1 -11  -6   42.38   10.89
  -1 -11  -6   57.80   12.18
   1 -11   6   19.26   14.53
   1  11  -6   30.12   12.48
  -1 -11   7  816.32   45.01
   1 -11  -7 1000.59   45.15
  -1  11  -7  874.33   46.66
   1 -11  -7  653.43   37.29
   1 -11   7  760.01   39.68
  -1 -11  -7  680.14   38.36
  -1 -11  -7  935.61   45.15
   1  11  -7  871.94   44.86
   1 -11  -8  163.92   26.60
  -1  11  -8  126.30   17.95
   1 -11  -8  131.73   20.87
   1 -11   8  180.03   25.01
  -1 -11  -8  153.22   20.73
  -1 -11  -8  166.80   14.02
   1  11  -8  129.57   17.30
   1 -11  -9  448.53   27.45
  -1 -11   9  305.29   39.20
   1 -11  -9  304.62   24.96
  -1  11  -9  296.47   34.94
   1 -11   9  400.13   46.59
  -1 -11  -9  369.72   23.81
   1  11  -9  338.30   26.40
  -1 -11  -9  291.80   28.42
   1 -11 -10   57.09   10.90
  -1 -11  10   64.46   15.81
   1 -11 -10   33.71   11.13
  -1  11 -10   37.30   31.82
  -1 -11 -10   85.03   19.91
   1 -11  10   56.57   27.66
  -1 -11 -10   33.06   14.95
   1  11 -10   57.23   34.15
   1 -11 -11   81.79   11.43
  -1 -11  11   93.42   18.83
   1 -11 -11   84.67   18.17
  -1  11 -11   86.89   19.26
   1 -11  11   70.11   20.55
  -1 -11 -11   87.63   16.43
   1  11 -11   87.07   18.12
  -1 -11 -11   80.88   17.38
  -1  11 -12  179.41   27.63
  -1 -11  12  156.08   22.01
   1 -11 -12  219.54   17.65
   1 -11 -12  186.48   24.51
  -1 -11 -12  183.94   20.60
  -1 -11 -12  102.99   20.74
   1 -11  12  163.23   27.37
   1  11 -12  157.82   21.81
  -1 -11  13 1278.78   62.84
   1 -11 -13 1059.70   58.40
   1 -11 -13 1503.26   59.68
  -1  11 -13 1338.97   64.16
  -1 -11 -13 1535.57   63.33
   1 -11  13 1172.87   57.80
  -1 -11 -13 1102.55   54.78
   1  11 -13 1371.68   64.99
  -1 -11  14   13.00   10.99
   1 -11 -14   14.26   13.72
  -1  11 -14    8.70   12.66
  -1 -11 -14    9.97   11.19
   1 -11  14   14.48   17.60
  -1 -11 -14   15.73   10.75
   1  11 -14    6.67   13.08
  -1 -11  15  950.66   57.39
   1 -11 -15 1192.40   52.63
   1 -11 -15  906.20   53.58
  -1  11 -15 1098.95   64.82
   1 -11  15 1006.89   55.66
  -1 -11 -15 1157.03   54.28
  -1 -11 -15  951.26   54.30
   1  11 -15 1274.47   70.02
  -1  11 -16   17.89   12.25
  -1 -11  16   28.33   13.88
   1 -11 -16    7.99    6.66
   1 -11 -16   18.88   10.46
  -1 -11 -16    9.19   18.33
  -1 -11 -16   30.96   22.45
   1 -11  16   11.11    5.91
   1  11 -16   27.21   17.93
  -1 -11  17   31.60   20.32
   1 -11 -17    7.05    6.45
   1 -11 -17    8.03   12.74
  -1  11 -17   39.23   28.01
  -1 -11 -17   23.57   19.77
  -1 -11 -17   16.72   12.38
   1  11 -17   22.85   14.11
  -1  11 -18   10.87   11.89
   1 -11 -18    5.56    8.47
   1 -11 -18   21.27   11.71
  -1 -11 -18   15.61   11.14
  -1 -11 -18   26.94   19.91
   1  11 -18   20.39   21.98
   1 -11  18   15.49   13.98
  -1 -11  19  389.31   42.75
   1 -11 -19  412.87   42.93
   1 -11 -19  403.36   33.58
  -1  11 -19  349.99   46.23
   1 -11  19  415.64   45.21
  -1 -11 -19  322.64   35.02
  -1 -11 -19  402.09   34.33
   1  11 -19  563.73   53.38
  -1  11 -20   34.78   17.12
  -1 -11  20   39.59   13.36
   1 -11 -20   40.15   41.55
  -1 -11 -20   84.06   22.54
  -1 -11 -20   63.41   24.32
   1  11 -20   59.16   22.77
   1 -11  20   34.81   14.92
  -1 -11  21   39.77   21.02
  -1  11 -21   73.40   34.24
   1 -11 -21  101.59   22.40
   1 -11  21  104.33   28.89
  -1 -11 -21   81.33   36.71
  -1 -11 -21   97.01   18.94
   1  11 -21   75.96   48.90
  -1 -11  22   41.13   16.98
   1 -11 -22   24.44   20.57
  -1  11 -22   36.64   32.04
   1 -11  22   43.57   21.11
  -1 -11 -22   35.09   27.53
   1  11 -22   54.30   27.91
   1 -11 -23  133.90   30.99
  -1 -11  23   69.17   28.60
  -1  11 -23   54.66   50.46
  -1 -11 -23  109.90   31.56
   1 -11  23  113.27   21.49
   1  11 -23  100.66   31.90
   1 -11 -24   19.13   20.40
  -1 -11  24   36.37   23.68
  -1  11 -24   31.77   28.59
  -1 -11 -24   10.62   14.87
   1 -11  24   40.10   18.50
   1  11 -24   27.42   23.59
  -1 -11  25  180.32   33.28
  -1  11 -25  339.32   43.87
   1 -11 -25  228.53   37.59
  -1 -11 -25  306.70   43.35
   1 -11  25  324.52   42.28
   1  11 -25  268.85   41.08
   1 -12   0   15.38    5.37
  -1 -12   0   33.04   16.41
   1 -12   0   14.93   14.58
  -1 -12   0   14.96    6.37
   1 -12  -1   13.76   13.16
   1 -12  -1   12.86    8.86
  -1 -12   1   30.35   16.02
  -1 -12   1   10.21   11.43
  -1 -12  -1    3.07    4.00
   1 -12   1    4.38   14.64
   1 -12   1   11.14   12.07
  -1 -12   2  223.13   24.68
   1 -12  -2  186.17   19.81
   1 -12  -2  119.03   19.32
  -1 -12   2  143.34   21.22
   1 -12   2  214.69   39.06
  -1 -12  -2  210.80   27.70
   1 -12   2  111.48   19.55
  -1 -12  -2  206.05   23.27
   1 -12  -3  156.00   17.91
  -1 -12   3  336.72   32.69
   1 -12  -3  234.15   22.11
  -1 -12  -3  296.59   25.45
   1 -12   3  219.31   30.17
  -1 -12  -3  184.69   20.11
   1 -12   3  274.29   52.98
  -1 -12   4 1541.20   55.20
   1 -12  -4 1251.21   47.81
   1 -12  -4 1781.49   56.01
  -1  12  -4 1442.94   52.86
   1 -12   4 1586.87   53.64
  -1 -12  -4 1233.60   45.18
  -1 -12  -4 1738.72   56.06
  -1 -12   5   18.28    8.96
  -1  12  -5    0.78    7.85
   1 -12  -5   16.23    9.55
   1 -12  -5   23.41   16.13
  -1 -12  -5   19.48   11.22
  -1 -12  -5    4.17    7.04
   1  12  -5    9.81    6.25
   1 -12   5   16.07    7.90
  -1 -12   6   11.72   11.95
  -1  12  -6   18.24   15.57
   1 -12  -6    8.53    9.35
   1 -12  -6   18.30   15.67
  -1 -12  -6   13.99   11.74
  -1 -12  -6    5.09    9.20
   1  12  -6    8.23    8.36
   1 -12   6   24.65   17.29
  -1 -12   7   33.61   15.31
  -1  12  -7   37.88   25.87
   1 -12  -7   44.51   14.35
   1 -12  -7   10.26    8.60
  -1 -12  -7   34.32   18.72
  -1 -12  -7   23.08    9.03
   1  12  -7   29.77   16.16
   1 -12   7    3.05    6.05
  -1  12  -8  473.35   44.83
  -1 -12   8  558.53   44.28
   1 -12  -8  638.12   43.92
   1 -12  -8  414.51   32.77
  -1 -12  -8  615.36   43.77
  -1 -12  -8  470.25   40.07
   1 -12   8  566.95   51.74
   1  12  -8  464.28   39.92
  -1  12  -9   52.78   28.11
  -1 -12   9   66.47   15.84
   1 -12  -9   64.17   14.36
   1 -12  -9   56.30   21.98
  -1 -12  -9   53.89   10.15
  -1 -12  -9   56.33   18.49
   1 -12   9   49.00   21.63
   1  12  -9   67.14   16.75
  -1 -12  10  430.56   37.72
   1 -12 -10  512.71   29.00
   1 -12 -10  354.84   33.59
  -1  12 -10  449.90   43.95
   1 -12  10  358.66   39.68
  -1 -12 -10  464.52   31.47
  -1 -12 -10  306.75   24.87
   1  12 -10  358.14   29.35
   1 -12 -11   24.08    9.59
  -1 -12  11   93.54   21.60
   1 -12 -11   26.39   18.85
  -1  12 -11   25.57   19.61
   1 -12  11   58.64   17.99
  -1 -12 -11   26.43   14.36
   1  12 -11   40.83   20.29
  -1 -12 -11   23.31   16.18
  -1  12 -12  303.69   30.60
  -1 -12  12  354.51   38.20
   1 -12 -12  398.89   29.91
   1 -12 -12  302.75   31.32
  -1 -12 -12  464.30   36.35
  -1 -12 -12  341.20   34.97
   1 -12  12  389.23   38.22
   1  12 -12  323.10   33.58
  -1  12 -13  126.19   25.59
  -1 -12  13  116.27   27.72
   1 -12 -13  124.95   23.21
   1 -12 -13   76.69   17.74
  -1 -12 -13  103.10   14.78
  -1 -12 -13  136.10   20.14
   1 -12  13  158.01   31.05
   1  12 -13  137.79   25.84
  -1 -12  14  384.53   36.68
   1 -12 -14  384.42   27.84
  -1  12 -14  382.87   43.76
   1 -12  14  293.19   36.41
  -1 -12 -14  428.78   30.24
  -1 -12 -14  315.46   28.61
   1  12 -14  496.91   42.90
  -1 -12  15   16.34    9.35
  -1  12 -15   25.01   13.77
   1 -12 -15   27.69    9.90
   1 -12 -15   31.27   19.62
  -1 -12 -15   24.90   12.75
  -1 -12 -15   16.05   13.94
   1  12 -15   22.78   18.50
   1 -12  15   15.59   10.97
   1 -12 -16   15.80    9.17
  -1 -12  16   30.35   15.72
   1 -12 -16   45.29   23.02
  -1  12 -16   13.90   16.53
  -1 -12 -16   46.13   19.08
   1 -12  16   28.19   15.24
  -1 -12 -16   14.05    9.20
   1  12 -16   13.65   17.77
  -1 -12  17   23.60   12.71
   1 -12 -17    5.13    8.17
   1 -12 -17   17.60   13.51
  -1  12 -17    7.98   14.54
  -1 -12 -17   14.29    7.51
   1  12 -17   23.53   29.50
  -1 -12  18  145.08   28.07
   1 -12 -18  196.24   17.48
  -1  12 -18  123.82   29.15
   1 -12 -18  130.49   24.77
   1 -12  18  135.17   26.55
  -1 -12 -18  133.28   34.97
  -1 -12 -18  203.18   27.84
   1  12 -18  251.67   32.66
  -1  12 -19   26.49   27.45
   1 -12 -19   19.67   16.97
   1 -12  19   16.99    9.54
  -1 -12 -19   37.79   18.61
  -1 -12 -19   13.88   12.83
   1  12 -19   39.07   20.26
   1 -12 -20   47.70   24.32
  -1 -12  20   79.49   24.76
  -1  12 -20   38.86   18.59
   1 -12  20   46.94   15.40
  -1 -12 -20  112.18   30.36
  -1 -12 -20   39.98   24.77
   1  12 -20   51.78   31.43
  -1 -12  21   36.53   16.73
  -1  12 -21   39.00   40.05
   1 -12 -21   18.37   28.21
   1 -12  21   35.73   10.65
   1  12 -21   41.48   37.50
  -1 -12 -21   20.28   25.24
   1 -12 -22   12.66   22.53
  -1 -12  22   31.06   13.39
  -1  12 -22   25.29   32.80
  -1 -12 -22   12.86   15.68
   1 -12  22   25.23   13.51
   1  12 -22   27.14   21.19
  -1 -12  23   11.11   13.60
   1 -12 -23   43.92   30.61
  -1  12 -23   45.73   46.17
   1 -12  23   21.31    7.32
  -1 -12 -23   35.97   22.90
   1  12 -23    8.79   14.32
  -1 -12  24   25.13   14.70
   1 -12 -24   12.23   18.88
  -1  12 -24   20.05   27.69
   1 -12  24   32.32   12.97
  -1 -12 -24   10.84   11.32
   1  12 -24   14.76   16.56
   1 -13   0    2.76    6.43
  -1 -13   0   10.49   12.90
   1 -13   0    9.77    4.52
  -1 -13   0   15.28   12.34
   1 -13  -1    8.03    5.41
  -1 -13   1    7.84    8.23
   1 -13  -1    3.74    9.03
  -1 -13   1   22.61   15.05
   1 -13   1   21.02   18.18
  -1 -13  -1   27.02   13.12
  -1 -13  -1   12.58    8.02
   1 -13   1   12.48    7.53
   1 -13  -2 1297.70   51.29
   1 -13  -2 1693.64   55.32
  -1 -13   2 1765.95   59.95
  -1 -13  -2 1760.92   59.43
  -1 -13  -2 1280.49   49.07
   1 -13   2 1402.68   54.98
   1 -13   2 1649.71   55.86
  -1 -13   3 1460.78   54.65
   1 -13  -3 1179.43   48.88
   1 -13  -3 1475.65   50.05
   1 -13   3 1414.92   54.28
  -1 -13  -3 1149.39   45.30
  -1 -13  -3 1460.75   52.14
   1 -13   3 1249.90   51.41
  -1 -13   4  686.39   60.93
   1 -13  -4  672.68   36.32
   1 -13  -4  517.24   37.98
  -1  13  -4  462.60   45.43
   1 -13   4  570.21   36.29
  -1 -13  -4  707.89   39.35
  -1 -13  -4  450.16   29.86
   1  13  -4  558.86   37.37
  -1 -13   5  765.07   56.65
   1 -13  -5  478.13   42.05
   1 -13  -5  683.86   47.06
  -1  13  -5  564.01   48.65
   1 -13   5  625.94   48.57
  -1 -13  -5  524.62   41.78
  -1 -13  -5  730.40   53.40
   1  13  -5  722.97   35.87
  -1 -13   6  240.13   32.71
   1 -13  -6  177.50   20.81
   1 -13  -6  249.43   29.54
  -1  13  -6  187.22   28.20
   1 -13   6  192.19   24.03
  -1 -13  -6  187.99   21.25
  -1 -13  -6  241.09   24.26
   1  13  -6  196.19   26.81
  -1 -13   7   57.23   23.82
  -1  13  -7   41.09   19.97
   1 -13  -7   39.39   15.94
   1 -13  -7   41.27   13.74
  -1 -13  -7   48.54   12.93
  -1 -13  -7   43.78   12.55
   1  13  -7   36.46   17.17
   1 -13   7   54.21   16.23
  -1  13  -8  302.33   33.36
  -1 -13   8  395.72   38.15
   1 -13  -8  412.26   31.98
   1 -13  -8  336.73   34.58
  -1 -13  -8  369.38   28.54
  -1 -13  -8  263.88   25.33
   1 -13   8  295.45   36.84
  -1  13  -9   36.53   19.04
  -1 -13   9   66.44   17.54
   1 -13  -9  109.80   14.76
   1 -13  -9  104.96   19.59
  -1 -13  -9   62.47   30.67
  -1 -13  -9   86.29   17.74
   1 -13   9   72.36   16.54
   1  13  -9   79.03   21.70
  -1 -13  10  141.84   25.45
  -1  13 -10  103.34   20.31
   1 -13 -10  183.88   21.05
   1 -13 -10  138.02   26.20
  -1 -13 -10  186.91   33.48
  -1 -13 -10  117.09   18.50
   1  13 -10  123.79   19.23
   1 -13  10  174.97   35.29
  -1 -13  11   14.55   11.10
   1 -13 -11   10.33   10.12
  -1  13 -11   19.97   12.34
   1 -13 -11   30.00   23.65
   1 -13  11   21.38   17.60
  -1 -13 -11   12.36   13.46
   1  13 -11    7.19   11.86
  -1 -13 -11   36.51   15.96
  -1 -13  12  229.35   24.45
   1 -13 -12  270.57   23.67
  -1  13 -12  206.33   34.46
   1 -13 -12  182.26   29.59
   1 -13  12  267.80   33.48
  -1 -13 -12  270.76   22.55
   1  13 -12  240.89   37.19
  -1 -13 -12  157.05   23.36
  -1  13 -13  291.06   31.31
  -1 -13  13  271.37   36.51
   1 -13 -13  271.25   26.36
   1 -13 -13  279.74   30.76
  -1 -13 -13  313.48   22.74
  -1 -13 -13  298.47   34.24
   1 -13  13  239.07   34.34
   1  13 -13  299.80   30.63
  -1 -13  14  943.74   54.33
   1 -13 -14 1176.90   47.79
  -1  13 -14 1091.99   56.50
   1 -13 -14  824.98   49.93
   1 -13  14 1022.08   58.49
  -1 -13 -14  874.83   46.73
  -1 -13 -14 1117.03   50.99
   1  13 -14 1190.07   57.05
  -1 -13  15   82.10   26.13
  -1  13 -15  126.34   23.78
   1 -13 -15  124.67   19.22
   1 -13 -15   78.49   26.46
  -1 -13 -15  133.61   25.42
  -1 -13 -15   92.20   24.08
   1  13 -15   97.20   25.65
   1 -13  15  144.69   33.01
  -1  13 -16  430.74   44.88
  -1 -13  16  371.61   35.92
   1 -13 -16  255.58   38.46
   1 -13 -16  367.99   27.98
  -1 -13 -16  290.73   32.26
  -1 -13 -16  367.17   27.72
   1 -13  16  269.75   37.33
   1  13 -16  333.59   43.51
   1 -13 -17   61.03   14.32
  -1 -13  17   74.39   19.01
   1 -13 -17   36.70   20.19
  -1  13 -17   45.03   27.13
  -1 -13 -17   34.80   13.03
   1 -13  17   60.95   17.19
  -1 -13 -17   82.20   34.48
   1  13 -17   52.20   24.56
  -1  13 -18  202.87   39.72
  -1 -13  18  177.23   28.57
   1 -13 -18  133.69   26.88
  -1 -13 -18  204.19   26.50
  -1 -13 -18  188.85   33.06
   1  13 -18  232.27   33.10
   1 -13  18  212.03   38.97
  -1 -13  19   22.70   14.47
  -1  13 -19   53.66   29.54
   1 -13 -19   19.93   10.56
   1 -13  19   16.94   17.45
  -1 -13 -19   35.72   23.63
  -1 -13 -19   13.26   16.37
   1  13 -19   12.14   24.86
   1 -13 -20  426.51   47.29
  -1 -13  20  354.50   40.91
  -1  13 -20  429.10   50.16
   1 -13  20  325.20   46.18
  -1 -13 -20  256.87   35.48
  -1 -13 -20  342.52   26.75
   1  13 -20  343.04   41.56
  -1 -13  21   19.97   19.44
  -1  13 -21   18.09   24.95
   1 -13 -21   11.63   14.12
   1 -13  21   18.55   20.48
   1  13 -21   24.91   28.12
  -1 -13 -21   15.31   15.80
  -1 -13  22   44.33   17.35
   1 -13 -22   12.85   21.69
  -1  13 -22   10.57   14.82
   1 -13  22   38.10   23.29
   1  13 -22   18.43   23.61
  -1 -13  23   50.04   18.32
   1 -13 -23   36.00   29.85
  -1  13 -23   22.74   20.62
   1 -13  23   53.27   23.15
  -1 -13 -23   12.45   25.82
   1  13 -23   23.66   20.59
  -1 -13  24  134.02   29.65
   1 -13 -24  237.76   40.55
  -1  13 -24  231.07   47.18
   1 -13  24  231.06   45.87
  -1 -13 -24  145.00   50.21
   1  13 -24  257.57   54.21
   1 -14   0    4.58    7.83
  -1 -14   0   10.78    7.30
   1 -14   0   12.30   18.81
  -1 -14   1   29.85   23.53
   1 -14  -1   24.89   11.39
  -1 -14   1   23.61   11.52
   1 -14  -1   15.21   12.00
  -1 -14  -1   13.92    7.85
   1 -14   1   22.16   12.91
   1 -14   1   31.47   14.11
  -1 -14  -1   21.84   15.44
   1 -14  -2  131.63   20.51
  -1 -14   2  126.53   24.09
  -1 -14   2   63.07   35.68
   1 -14  -2  108.49   16.55
  -1 -14  -2  128.49   24.14
   1 -14   2  129.53   34.96
   1 -14   2   73.37   21.26
  -1 -14  -2   92.07   19.61
  -1 -14   3 1120.57   57.63
   1 -14  -3 1183.93   55.45
   1 -14  -3  869.29   48.11
   1 -14   3 1065.82   80.35
  -1 -14  -3 1169.56   56.42
  -1 -14  -3  825.75   45.75
   1 -14   3  810.63   45.97
   1 -14  -4  117.95   14.54
  -1 -14   4   83.33   23.48
   1 -14  -4   73.33   18.17
  -1  14  -4   82.19   49.89
  -1 -14  -4  139.90   35.70
   1 -14   4  112.93   18.03
  -1 -14  -4   82.86   15.75
   1  14  -4   83.04   20.84
  -1  14  -5  109.94   19.80
  -1 -14   5  151.02   31.88
   1 -14  -5   89.34   18.77
   1 -14  -5  122.09   22.10
  -1 -14  -5   86.25   17.46
  -1 -14  -5  124.99   20.02
   1 -14   5  123.38   20.96
   1  14  -5  140.18   18.74
  -1  14  -6  321.57   30.00
  -1 -14   6  433.45   41.04
   1 -14  -6  304.06   31.03
   1 -14  -6  486.18   33.83
  -1 -14  -6  284.86   26.40
  -1 -14  -6  381.39   39.24
   1 -14   6  354.92   29.88
   1  14  -6  327.35   30.13
  -1  14  -7  114.35   19.19
  -1 -14   7  112.14   20.20
   1 -14  -7   83.06   13.70
   1 -14  -7   74.43   22.69
  -1 -14  -7  124.18   18.68
  -1 -14  -7   96.64   18.57
   1 -14   7   80.82   20.08
   1  14  -7   87.89   15.52
  -1 -14   8   25.73   15.01
   1 -14  -8   27.16   21.31
   1 -14  -8   21.52   12.39
  -1  14  -8   15.66   11.58
  -1 -14  -8   16.89   10.69
  -1 -14  -8   33.26   14.01
   1  14  -8    2.33   12.56
  -1 -14   9  387.07   35.54
  -1  14  -9  376.25   37.16
   1 -14  -9  453.21   32.97
   1 -14  -9  308.48   34.83
  -1 -14  -9  423.88   33.81
  -1 -14  -9  310.42   29.18
   1  14  -9  340.10   33.98
   1 -14   9  305.83   33.89
  -1 -14  10   49.00   21.22
   1 -14 -10   23.11    9.49
  -1  14 -10   28.27   21.41
   1 -14 -10   43.13   26.02
  -1 -14 -10   19.34   21.95
  -1 -14 -10   44.55   22.79
   1  14 -10    3.67    9.49
  -1  14 -11   31.88   20.05
  -1 -14  11   35.27   15.42
   1 -14 -11   48.43   13.12
   1 -14 -11   23.86   11.02
  -1 -14 -11   60.48   15.96
  -1 -14 -11   31.42   21.65
   1 -14  11   24.93   18.62
   1  14 -11   73.00   18.40
  -1 -14  12    9.57    9.07
   1 -14 -12   37.49   13.71
   1 -14 -12   15.93    5.57
  -1  14 -12   13.03    8.86
   1 -14  12   46.62   18.02
  -1 -14 -12   32.92   14.90
  -1 -14 -12   19.01   13.80
   1  14 -12   20.69   15.78
  -1  14 -13  314.05   40.00
  -1 -14  13  425.30   43.11
   1 -14 -13  403.04   29.38
   1 -14 -13  400.67   47.94
  -1 -14 -13  435.69   31.96
  -1 -14 -13  315.28   32.15
   1 -14  13  367.25   34.29
   1  14 -13  367.83   36.48
  -1 -14  14   16.65    8.26
  -1  14 -14   29.03   18.94
   1 -14 -14   15.96   46.11
   1 -14 -14   55.68   27.78
  -1 -14 -14   10.09    9.51
  -1 -14 -14   29.29   18.97
   1  14 -14   16.51   13.41
   1 -14  14   28.89    9.67
  -1 -14  15  404.06   42.46
   1 -14 -15  355.01   28.32
  -1  14 -15  362.63   38.36
   1 -14 -15  272.07   36.46
   1 -14  15  309.48   32.70
  -1 -14 -15  366.92   31.34
   1  14 -15  392.53   46.45
  -1 -14 -15  262.52   32.25
  -1 -14  16   40.94   19.04
  -1  14 -16   20.33   15.14
   1 -14 -16   22.19    6.72
   1 -14 -16   38.69   24.93
  -1 -14 -16   31.35   22.04
  -1 -14 -16   59.48   25.90
   1  14 -16   20.18   13.84
   1 -14  16   41.09   15.30
  -1  14 -17   12.63    8.97
  -1 -14  17   38.34   22.64
   1 -14 -17    5.92    9.05
  -1 -14 -17   40.77   20.59
  -1 -14 -17   23.63   10.18
   1  14 -17    3.23    9.73
   1 -14  17   18.54   11.42
  -1 -14  18   39.38   23.03
   1 -14 -18   29.01   16.14
  -1  14 -18   37.90   20.24
  -1 -14 -18   66.16   20.26
   1 -14  18   75.23   24.50
   1  14 -18   13.85    9.63
  -1 -14 -18   52.32   25.82
  -1 -14  19   85.97   26.04
  -1  14 -19   98.71   20.45
   1 -14 -19   49.13   20.64
   1 -14  19   64.28   27.32
  -1 -14 -19   49.50   28.77
  -1 -14 -19   51.47   35.24
   1  14 -19   35.47   44.86
  -1 -14  20  107.57   26.73
  -1  14 -20  117.53   38.95
   1 -14 -20   75.14   25.00
  -1 -14 -20  115.98   33.91
   1 -14  20   65.78   23.68
   1  14 -20   72.94   35.37
  -1 -14  21   71.04   25.02
  -1  14 -21   66.36   37.68
   1 -14 -21  113.23   24.88
  -1 -14 -21   62.35   40.36
   1 -14  21   88.29   22.61
   1  14 -21   52.14   37.64
   1 -14 -22   22.28   17.24
  -1 -14  22   16.37   13.44
  -1  14 -22    5.49   15.90
  -1 -14 -22   14.51   10.87
   1 -14  22   21.61   13.92
   1  14 -22  124.80  113.31
  -1 -14  23   16.22   18.20
  -1  14 -23   13.34   15.05
   1 -14 -23   17.34   11.82
  -1 -14 -23   24.54   21.51
   1 -14  23   18.57   13.31
   1  14 -23   10.69   21.07
   1 -15   0    2.03    4.90
   1 -15   0   15.40   11.98
  -1 -15   0   22.09   11.61
   1 -15  -1  378.55   30.20
   1 -15  -1  272.13   31.43
  -1 -15   1  295.33   32.11
  -1 -15   1  339.86   37.93
  -1 -15  -1  231.60   24.68
  -1 -15  -1  370.93   30.69
   1 -15   1  261.17   30.88
   1 -15   1  354.22   31.01
   1 -15  -2 1627.65   73.12
  -1 -15   2 1618.87   78.18
  -1 -15   2 1247.67   62.83
   1 -15  -2 1277.40   66.16
   1 -15   2 1608.67   74.71
  -1 -15  -2 1732.74   78.62
   1 -15   2 1291.48   67.88
  -1 -15  -2 1269.95   65.28
  -1 -15   3  444.53   45.05
   1 -15  -3  343.10   31.25
   1 -15  -3  466.62   32.74
  -1 -15  -3  418.23   33.31
   1 -15   3  418.76   33.91
  -1 -15  -3  306.21   26.96
   1  15  -3  263.03   28.29
  -1 -15   4 1685.69   79.00
  -1  15  -4 1581.29   75.23
   1 -15  -4 1279.76   66.31
   1 -15  -4 1819.29   81.40
  -1 -15  -4 1391.26   68.35
  -1 -15  -4 1868.65   83.39
   1  15  -4 1506.01   72.42
   1 -15   4 1768.88   81.28
  -1  15  -5   58.52   46.47
  -1 -15   5  157.63   25.55
   1 -15  -5  137.94   25.89
   1 -15  -5  161.65   21.26
  -1 -15  -5  115.43   27.03
  -1 -15  -5  209.00   28.85
   1 -15   5  130.59   17.80
   1  15  -5  135.73   21.60
  -1  15  -6    8.59   10.06
  -1 -15   6   34.30   24.61
   1 -15  -6   16.70   10.09
   1 -15  -6    7.03    8.15
  -1 -15  -6   17.70    9.78
  -1 -15  -6   16.77   17.43
   1 -15   6   50.19   18.09
   1  15  -6    7.33   14.59
  -1  15  -7 1323.79   64.74
  -1 -15   7 1691.25   80.87
   1 -15  -7 1248.46   65.02
   1 -15  -7 1559.57   64.10
  -1 -15  -7 1386.00   65.95
  -1 -15  -7 1590.62   68.29
   1 -15   7 1470.23   69.89
   1  15  -7 1501.00   70.56
  -1 -15   8 1243.02   65.05
   1 -15  -8 1448.63   63.82
   1 -15  -8 1098.57   59.84
  -1  15  -8 1429.31   73.08
   1 -15   8 1474.59   74.16
  -1 -15  -8 1631.77   73.09
  -1 -15  -8 1066.16   56.92
   1  15  -8 1498.90   73.76
  -1  15  -9 1323.09   67.33
  -1 -15   9 1451.15   72.93
   1 -15  -9 1452.70   67.01
   1 -15  -9 1113.99   58.68
  -1 -15  -9 1444.35   72.62
  -1 -15  -9 1119.55   63.07
   1 -15   9 1396.90   77.59
   1  15  -9 1303.19   71.98
  -1 -15  10   98.62   18.95
   1 -15 -10   97.14   16.05
  -1  15 -10  113.20   25.96
   1 -15 -10   77.74   18.81
   1 -15  10   99.01   21.43
  -1 -15 -10   96.62   21.76
  -1 -15 -10   76.22   28.77
   1  15 -10   98.04   25.47
  -1  15 -11  161.16   31.41
  -1 -15  11  134.41   21.27
   1 -15 -11  181.44   20.53
   1 -15 -11  171.41   34.86
  -1 -15 -11  204.33   23.64
  -1 -15 -11  201.37   24.59
   1 -15  11  113.96   27.23
   1  15 -11  199.11   26.65
  -1  15 -12  265.72   36.32
  -1 -15  12  215.33   39.11
   1 -15 -12  332.45   33.15
   1 -15 -12  196.60   29.97
  -1 -15 -12  255.73   25.55
  -1 -15 -12  164.83   29.65
   1 -15  12  277.24   43.10
   1  15 -12  189.44   26.78
  -1  15 -13   10.70   14.97
  -1 -15  13   17.52   17.30
   1 -15 -13    9.23    5.61
   1 -15 -13   18.70   16.58
  -1 -15 -13   20.64   10.15
  -1 -15 -13   13.55   24.65
   1 -15  13   30.51   13.12
  -1  15 -14  804.22   59.95
  -1 -15  14  865.89   62.47
   1 -15 -14 1002.31   56.05
   1 -15 -14  710.99   51.03
  -1 -15 -14  954.62   57.05
  -1 -15 -14  567.39   53.40
   1 -15  14  733.87   55.77
   1  15 -14  815.60   70.28
  -1 -15  15   48.13   17.06
  -1  15 -15   36.84   19.83
   1 -15 -15   60.36   16.61
   1 -15 -15   30.47   15.49
  -1 -15 -15   35.70   22.13
  -1 -15 -15   47.35   27.23
   1  15 -15   38.27   20.93
   1 -15  15   48.42   31.87
  -1 -15  16   67.85   28.06
   1 -15 -16   98.11   20.43
  -1  15 -16   79.63   28.80
  -1 -15 -16  106.97   27.72
   1 -15  16   89.62   25.44
  -1 -15 -16   59.52   40.79
   1  15 -16   93.83   22.29
  -1 -15  17   15.49    9.65
  -1  15 -17   14.72   21.63
   1 -15 -17   22.07   19.25
   1 -15  17   49.76   21.03
  -1 -15 -17   21.26   21.22
  -1 -15 -17   23.93   22.07
   1  15 -17   17.69   10.52
  -1 -15  18   33.04   17.77
   1 -15 -18   56.44   30.81
  -1  15 -18   49.42   50.51
  -1 -15 -18   78.75   39.33
   1 -15  18   76.16   22.05
  -1 -15 -18   88.45   24.77
   1  15 -18   41.35   25.82
  -1 -15  19  567.47   59.30
  -1  15 -19  530.31   56.19
   1 -15 -19  625.92   57.88
  -1 -15 -19  471.00   57.47
   1 -15  19  605.06   56.97
   1  15 -19  663.45   69.03
  -1 -15  20  240.00   42.35
   1 -15 -20  191.39   35.91
  -1  15 -20  223.10   33.47
   1 -15  20  248.96   37.05
  -1 -15 -20  132.18   27.13
   1  15 -20  250.76   36.55
  -1 -15  21  160.05   45.59
  -1  15 -21  146.57   41.01
   1 -15 -21  131.95   28.22
  -1 -15 -21  110.69   28.01
   1 -15  21   96.43   37.04
   1  15 -21  107.93   28.13
  -1 -15  22    9.97   15.62
   1 -15 -22   14.88   15.46
  -1  15 -22   26.73   28.01
   1 -15  22   43.42   15.93
  -1 -15 -22   17.04   19.14
   1  15 -22   21.12   13.75
   1 -16   0    9.67   10.93
  -1 -16   0   12.48   16.39
   1 -16   0   24.85   20.15
  -1 -16   0   17.68   11.16
   1 -16  -1   69.40   19.12
  -1 -16   1  124.46   23.55
  -1 -16   1   80.25   13.50
   1 -16  -1   48.00   21.05
   1 -16   1  104.87   30.60
  -1 -16  -1   91.74   20.50
   1 -16   1   54.72   21.43
  -1 -16  -1   67.73   24.88
  -1 -16   2  458.88   40.25
   1 -16  -2  532.86   54.51
  -1 -16   2  506.22   49.40
   1 -16  -2  386.92   37.19
  -1 -16  -2  543.37   40.91
   1 -16   2  319.74   33.26
   1 -16   2  543.88   43.69
  -1 -16  -2  392.92   33.28
   1 -16  -3   27.81    7.27
  -1 -16   3   21.41   16.75
   1 -16  -3   37.12   18.74
   1 -16   3   53.58   25.47
  -1 -16  -3   61.53   17.57
  -1 -16  -3   34.85   21.57
   1  16  -3   22.69   16.40
  -1 -16   4   70.25   31.31
   1 -16  -4   13.40   16.07
   1 -16  -4   78.29   14.92
  -1  16  -4   49.49   12.89
  -1 -16  -4   56.50   16.02
   1 -16   4   43.71   18.91
  -1 -16  -4   35.02   16.46
   1  16  -4   35.46   31.05
  -1 -16   5   46.88   22.83
   1 -16  -5   33.94   10.21
  -1  16  -5   27.42   25.08
   1 -16  -5   26.05   12.40
   1 -16   5   43.20   20.86
  -1 -16  -5   27.92   20.96
  -1 -16  -5   39.00   16.69
   1  16  -5   28.84   24.39
  -1 -16   6  128.88   23.84
  -1  16  -6   98.31   65.28
   1 -16  -6  150.74   36.51
   1 -16  -6  111.27   25.02
  -1 -16  -6  136.01   25.08
  -1 -16  -6  136.65   22.74
   1  16  -6   98.16   25.17
   1 -16   6  119.30   27.10
  -1 -16   7   60.94   20.73
   1 -16  -7   63.65   18.39
   1 -16  -7   63.91   19.97
  -1  16  -7   29.82   33.07
   1 -16   7   67.77   17.19
  -1 -16  -7  112.20   31.53
  -1 -16  -7   73.57   31.82
   1  16  -7   54.46   18.65
  -1 -16   8  185.84   27.68
   1 -16  -8  153.76   22.17
   1 -16  -8  205.99   27.38
  -1  16  -8  193.96   32.93
   1 -16   8  173.81   41.06
  -1 -16  -8  165.41   28.98
  -1 -16  -8  185.76   27.12
   1  16  -8  193.56   22.45
  -1 -16   9    9.52    9.83
   1 -16  -9   27.30   14.62
   1 -16  -9   28.40   16.40
  -1  16  -9    7.67   13.24
  -1 -16  -9   31.00   26.55
   1 -16   9   18.24    7.28
   1  16  -9   11.39   10.80
  -1  16 -10   32.17   15.40
   1 -16 -10   27.47   15.54
   1 -16 -10  444.70  234.71
  -1 -16 -10   18.98   18.11
  -1 -16 -10   26.08   15.02
   1  16 -10    9.29   16.46
   1 -16  10    3.35    6.08
  -1  16 -11    9.80   17.42
  -1 -16  11   19.91   15.17
   1 -16 -11   10.57    6.89
  -1 -16 -11   17.25   16.47
  -1 -16 -11   21.97   16.72
   1  16 -11   20.28   10.31
   1 -16  11   27.99   14.90
  -1 -16  12   43.57   23.88
   1 -16 -12   12.77   12.00
  -1  16 -12    8.93   17.18
   1 -16  12   32.92   23.52
  -1 -16 -12   17.71   10.38
  -1 -16 -12   18.08   15.99
   1  16 -12   11.30   21.27
  -1 -16  13   40.00   19.47
   1 -16 -13   71.85   21.37
  -1  16 -13   32.17   25.38
   1 -16 -13   23.84   13.89
   1 -16  13   46.14   21.87
  -1 -16 -13   30.00   12.48
   1  16 -13   96.47   24.42
  -1 -16 -13   51.06   16.07
  -1 -16  14  151.21   28.09
   1 -16 -14  148.70   16.78
  -1  16 -14   78.41   28.68
   1 -16 -14   37.56   19.40
   1 -16  14  146.65   29.90
  -1 -16 -14  124.63   26.37
   1  16 -14  147.28   25.21
  -1 -16 -14   73.24   26.02
  -1 -16  15   29.66   13.59
  -1  16 -15   17.85   26.34
   1 -16 -15   11.97    8.35
   1 -16 -15    5.06   17.95
  -1 -16 -15   23.63   12.91
  -1 -16 -15   11.62   11.88
   1  16 -15   23.35   22.23
   1 -16  15   27.34   15.88
  -1  16 -16   37.46   31.20
  -1 -16  16   27.43   13.31
   1 -16 -16   22.10   14.49
  -1 -16 -16   59.79   15.46
  -1 -16 -16   43.43   27.01
   1  16 -16   61.03   47.59
   1 -16  16   60.81   18.06
  -1 -16  17   37.18   12.19
   1 -16 -17   11.44   15.58
  -1  16 -17   16.69    7.68
  -1 -16 -17   29.52   13.83
   1 -16  17   18.84   12.15
  -1 -16 -17    7.15    9.53
   1  16 -17   25.44   30.82
   1 -16 -18   32.13   21.72
  -1 -16  18  107.61   26.02
  -1  16 -18   82.71   22.42
  -1 -16 -18  112.68   28.02
   1 -16  18  111.76   25.73
   1  16 -18   33.65   15.41
  -1 -16  19   17.44   23.19
   1 -16 -19   30.22   12.20
  -1  16 -19   46.45   21.78
   1 -16  19   17.24   13.44
  -1 -16 -19   31.68   15.81
   1  16 -19    8.67    9.41
  -1 -16  20  327.92   53.47
   1 -16 -20  324.73   58.50
  -1  16 -20  336.36   50.62
   1 -16  20  301.11   54.13
  -1 -16 -20  303.57   48.22
   1  16 -20  360.18   58.65
  -1 -16  21   16.79   13.41
  -1  16 -21   47.50   28.31
   1 -16 -21   24.09   13.59
   1 -16  21   23.99   20.93
   1  16 -21    5.53   11.99
  -1 -16 -21   22.00   21.69
   1 -17   0   22.19   14.87
  -1 -17   0   22.53   24.52
  -1 -17   0   20.52    9.57
   1 -17   0   34.23   20.79
  -1 -17   1  249.60   36.19
   1 -17  -1  389.58   40.70
   1 -17  -1  222.97   27.06
  -1 -17   1  251.95   31.23
   1 -17   1  323.07   31.66
  -1 -17  -1  334.62   43.36
   1 -17   1  270.66   32.44
  -1 -17  -1  293.86   30.92
  -1 -17   2  428.31   41.29
  -1 -17   2  305.84   41.87
   1 -17  -2  401.49   35.97
   1 -17  -2  428.64   36.73
  -1 -17  -2  451.42   41.87
   1 -17   2  376.13   42.86
   1 -17   2  391.14   36.12
  -1 -17  -2  331.08   35.65
   1 -17  -3  794.01   45.63
  -1 -17   3  720.22   43.36
   1 -17  -3  636.59   40.10
  -1  17  -3  584.05   40.88
  -1 -17  -3  826.89   48.69
   1 -17   3  748.88   49.34
   1  17  -3  646.60   41.55
  -1 -17  -3  695.37   44.03
  -1 -17   4   78.19   27.32
  -1  17  -4   42.32   18.41
   1 -17  -4   78.92   20.53
   1 -17  -4   38.86   14.09
  -1 -17  -4   78.98   24.38
  -1 -17  -4   49.19   20.70
   1  17  -4   38.27   25.39
   1 -17   4   72.62   29.21
  -1 -17   5   74.23   29.05
   1 -17  -5   54.48   17.38
   1 -17  -5   31.67   11.51
  -1  17  -5   65.98   22.77
   1 -17   5   66.01   13.44
  -1 -17  -5   45.90   10.81
  -1 -17  -5   57.18   31.84
   1  17  -5   35.56   21.72
  -1 -17   6   77.18   16.75
   1 -17  -6   86.12   25.64
  -1  17  -6   39.56   24.06
   1 -17  -6   65.36   18.53
   1 -17   6  109.32   17.15
  -1 -17  -6   41.35   29.68
   1  17  -6   32.08   23.73
  -1 -17  -6   56.57   21.54
  -1  17  -7 1373.08   70.32
  -1 -17   7 1355.18   70.76
   1 -17  -7 1535.40   65.65
   1 -17  -7 1095.80   57.85
  -1 -17  -7 1639.29   72.59
  -1 -17  -7 1151.90   58.79
   1 -17   7 1426.46   68.65
   1  17  -7 1375.79   66.04
  -1 -17   8   42.43   15.99
   1 -17  -8   16.15   10.13
  -1  17  -8   26.31   18.40
   1 -17  -8   13.31   12.42
   1  17  -8   20.11   13.68
  -1 -17  -8    4.52    9.94
  -1 -17   9 1321.67   86.77
   1 -17  -9 1302.56   65.34
   1 -17  -9 1655.01   69.55
  -1  17  -9 1464.34   73.15
  -1 -17  -9 1488.63   67.28
   1 -17   9 1352.17   68.67
  -1 -17  -9 1082.77   58.05
   1  17  -9 1370.01   69.45
  -1 -17  10   20.26   11.34
   1 -17 -10   20.00   19.28
   1 -17 -10    6.76    7.56
  -1  17 -10   23.27   20.91
  -1 -17 -10    9.35   11.99
   1 -17  10   20.84   15.23
  -1 -17 -10   24.95   16.27
   1  17 -10   15.46   21.75
  -1  17 -11   95.05   36.55
  -1 -17  11   65.10   42.26
   1 -17 -11   67.27   15.26
   1 -17 -11   82.33   19.54
  -1 -17 -11   39.93   18.89
  -1 -17 -11   45.42   18.53
   1 -17  11   51.30   26.15
   1  17 -11   61.32   26.06
  -1  17 -12   42.33   29.46
  -1 -17  12   35.12    8.33
   1 -17 -12   21.11   12.61
   1 -17 -12   52.91   24.53
  -1 -17 -12   36.20   15.91
  -1 -17 -12   63.55   26.00
   1 -17  12   36.67   29.04
   1  17 -12   20.52   12.48
   1 -17 -13  305.48   33.22
  -1 -17  13  241.95   38.57
   1 -17 -13  332.86   35.99
  -1  17 -13  284.17   36.10
   1 -17  13  293.24   34.09
  -1 -17 -13  335.85   36.84
   1  17 -13  285.17   33.22
  -1 -17 -13  168.87   27.64
  -1  17 -14   21.46   18.34
  -1 -17  14   23.04   16.04
   1 -17 -14   28.22   14.99
   1 -17 -14   13.62   11.49
  -1 -17 -14   15.49   11.17
  -1 -17 -14   19.56   22.00
   1 -17  14   22.60   18.41
   1  17 -14   27.64   17.70
  -1 -17  15  207.49   33.22
   1 -17 -15   93.72   25.58
  -1  17 -15  119.77   28.69
   1 -17  15  139.52   25.06
  -1 -17 -15  239.10   29.47
  -1 -17 -15  180.86   32.95
   1  17 -15  195.94   49.95
  -1 -17  16   19.51   22.53
   1 -17 -16    8.04    9.89
  -1  17 -16    4.75   11.69
  -1 -17 -16   31.07    9.96
   1 -17  16   20.42   18.29
   1  17 -16   10.96   15.75
  -1 -17 -16   11.79    6.04
   1 -17 -17   20.25    9.52
  -1 -17  17   46.57   19.22
  -1  17 -17   12.65   21.75
   1 -17  17   24.68   13.88
   1  17 -17   32.84   16.31
  -1 -17 -17   27.34   25.28
  -1 -17  18   18.80   10.03
  -1  17 -18   38.12   26.21
   1 -17 -18   32.88   28.92
   1  17 -18   19.61   21.40
   1 -17  18   39.13   12.80
  -1 -17  19  412.12   59.49
  -1  17 -19  618.89   81.54
   1 -17 -19  382.57   57.82
  -1 -17 -19  430.56   60.24
   1 -17  19  526.05   69.23
   1  17 -19  534.77   69.67
  -1 -17  20   73.31   25.68
   1 -17 -20   49.86   25.46
  -1  17 -20   45.45   26.10
   1 -17  20   38.02   18.06
  -1 -17 -20   95.03   28.27
   1  17 -20   48.56   47.45
   1 -18   0    9.84   16.31
  -1 -18   0   30.83   15.02
   1 -18   0   14.61   10.57
  -1 -18   0   15.13   12.25
   1 -18  -1  243.27   32.95
  -1 -18   1  146.87   28.51
  -1 -18   1  303.82   40.02
   1 -18  -1  154.94   22.30
  -1 -18  -1  260.76   32.13
   1 -18   1  179.09   30.76
  -1 -18  -1  178.66   27.25
   1 -18   1  240.92   26.87
  -1 -18   2   97.40   24.00
   1 -18  -2   74.90   26.69
   1 -18  -2   79.87   19.59
  -1 -18  -2   82.92   19.76
  -1 -18  -2   39.04   23.07
   1 -18   2  125.66   24.65
   1 -18   2   77.40   18.99
   1 -18  -3  486.71   40.32
  -1 -18   3  427.28   40.77
   1 -18  -3  301.09   35.31
  -1  18  -3  429.58   41.65
  -1 -18  -3  290.95   32.63
   1 -18   3  396.03   41.45
  -1 -18  -3  520.16   45.78
   1  18  -3  331.73   35.40
   1 -18  -4   94.01   36.00
  -1 -18   4   71.45   19.23
   1 -18  -4  103.43   27.31
  -1  18  -4   57.94   30.70
   1 -18   4  102.02   39.27
  -1 -18  -4   56.89   28.90
  -1 -18  -4   63.06   23.27
   1  18  -4  109.34   36.00
   1 -18  -5   51.63   28.39
  -1 -18   5   75.61   22.30
  -1  18  -5   43.62   36.50
   1 -18  -5   93.72   24.32
   1 -18   5   22.24   13.38
  -1 -18  -5   33.71   15.08
  -1 -18  -5   31.02    6.92
   1  18  -5   33.92   28.30
  -1  18  -6   56.43   31.21
  -1 -18   6   82.06   41.71
   1 -18  -6   69.51   16.61
   1 -18  -6   46.03   18.56
  -1 -18  -6  101.17   24.54
  -1 -18  -6   78.52   19.33
   1 -18   6   93.83   19.48
   1  18  -6   98.66   24.66
  -1 -18   7  181.59   42.89
   1 -18  -7  233.76   25.99
  -1  18  -7  165.52   38.96
   1 -18  -7  131.92   23.61
   1 -18   7  180.96   30.69
  -1 -18  -7  234.51   30.64
   1  18  -7  156.93   30.51
  -1 -18  -7  219.04   27.23
   1 -18  -8  484.10   49.18
  -1 -18   8  480.28   43.52
   1 -18  -8  304.94   32.48
  -1  18  -8  408.52   39.99
   1 -18   8  414.89   44.47
  -1 -18  -8  462.94   55.33
   1  18  -8  441.36   45.19
  -1 -18  -8  309.77   35.95
   1 -18  -9  129.21   32.33
  -1 -18   9   38.37   33.18
   1 -18  -9   27.05   11.37
  -1  18  -9   62.54   25.16
  -1 -18  -9   36.55   21.57
   1 -18   9   29.29   20.73
  -1 -18  -9   40.31   20.46
   1  18  -9   32.40   23.84
  -1 -18  10  210.38   52.46
  -1  18 -10  220.17   47.64
   1 -18 -10  284.71   31.88
   1 -18  10  296.53   39.08
  -1 -18 -10  197.86   28.62
  -1 -18 -10  258.23   29.94
   1  18 -10  165.26   35.85
  -1 -18  11   47.04   14.88
   1 -18 -11   44.54   20.51
   1 -18 -11    5.60   12.51
  -1  18 -11   16.64   23.65
   1 -18  11   29.85   13.96
  -1 -18 -11   35.57   14.46
  -1 -18 -11    9.66   11.16
   1  18 -11   21.97   14.26
   1 -18 -12   10.90   11.13
  -1 -18  12    9.70    7.37
   1 -18 -12   31.84   17.33
   1 -18  12   27.40   16.75
  -1 -18 -12   21.73   14.73
  -1 -18 -12   16.00   12.62
  -1  18 -13   14.79   20.20
   1 -18 -13    8.85    8.94
   1 -18 -13    8.97   10.52
  -1 -18 -13    2.89    6.92
  -1 -18 -13    8.69    7.59
   1  18 -13   11.47   17.92
   1 -18  13   29.68   10.70
  -1 -18  14   18.82    8.10
   1 -18 -14    7.19   13.72
  -1  18 -14   12.47   24.32
  -1 -18 -14   16.69    8.90
   1 -18  14   32.41   14.26
  -1 -18 -14   21.11   15.36
  -1 -18  15   61.51   25.67
   1 -18 -15   77.39   26.95
  -1  18 -15   91.58   29.04
   1 -18  15  107.76   28.10
  -1 -18 -15   70.46   18.02
  -1 -18 -15   78.41   21.65
   1  18 -15  114.65   29.24
  -1 -18  16   17.65   16.31
   1 -18 -16   33.51   13.42
  -1  18 -16   13.79   13.42
   1 -18  16   34.79   19.65
  -1 -18 -16   22.04   14.82
   1  18 -16   14.99   14.09
  -1 -18  17   15.52    9.49
  -1  18 -17   28.46   22.25
   1 -18 -17   18.01   16.90
  -1 -18 -17    4.44   11.80
   1 -18  17   25.62   17.66
   1  18 -17   20.09   10.23
  -1 -18  18   37.28   11.97
  -1  18 -18   49.72   20.53
   1 -18 -18   55.83   26.65
   1 -18  18   80.05   24.24
   1  18 -18   86.28   30.76
  -1 -18 -18   30.56   15.13
  -1 -18  19  135.34   31.61
   1 -18 -19  121.22   35.15
  -1  18 -19  202.77   31.89
   1 -18  19  209.36   38.90
  -1 -18 -19  181.91   49.68
   1  18 -19  191.44   33.24
  -1 -19   0   19.99   17.81
   1 -19   0   22.19   25.56
  -1 -19   0   18.21   10.34
   1 -19  -1   29.28   24.82
   1 -19  -1   12.71    6.08
  -1 -19   1   35.03   25.67
  -1 -19   1   21.81   15.30
   1 -19   1   31.51   18.10
  -1 -19  -1   49.54   20.26
   1 -19   1    8.10    8.10
  -1 -19  -1   32.28   14.88
  -1 -19   2  325.01   52.18
   1 -19  -2  267.87   30.05
   1 -19  -2  232.61   28.92
   1 -19   2  230.37   27.26
  -1 -19  -2  291.12   34.48
  -1 -19  -2  281.43   29.86
  -1 -19   3   37.85   13.85
   1 -19  -3   81.86   23.27
  -1  19  -3   15.90   18.50
  -1 -19  -3   24.87   13.94
  -1 -19  -3   21.12   11.99
   1 -19   3    5.34    9.43
   1  19  -3   24.29   25.06
   1 -19  -4  659.12   48.66
   1 -19  -4  586.47   48.43
  -1 -19   4  594.72   48.51
  -1  19  -4  527.05   51.34
   1 -19   4  604.99   69.77
  -1 -19  -4  405.68   37.39
  -1 -19  -4  712.83   52.18
   1  19  -4  494.70   45.59
  -1 -19   5   48.80   31.10
   1 -19  -5   19.12   13.54
   1 -19  -5   46.50   28.87
  -1  19  -5   35.61   42.72
   1 -19   5   67.89   26.04
  -1 -19  -5   31.65   12.57
  -1 -19  -5   30.20   12.71
   1  19  -5   33.15   19.49
   1 -19  -6   29.95   17.91
  -1  19  -6   24.66   15.19
  -1 -19   6   28.04    9.14
   1 -19  -6    5.25   13.33
  -1 -19  -6   11.10    6.58
  -1 -19  -6   25.82   10.77
   1  19  -6   21.49   13.59
   1 -19   6   27.16   17.80
   1 -19  -7   24.07   14.66
  -1 -19   7   89.07   24.70
   1 -19  -7   24.91   19.79
  -1  19  -7   27.97   18.94
   1 -19   7   70.52   26.23
  -1 -19  -7   38.19   16.78
   1  19  -7   32.26   15.76
  -1 -19  -7   44.74   19.59
   1 -19  -8  504.34   49.08
  -1 -19   8  311.50   31.85
   1 -19  -8  405.26   47.04
  -1  19  -8  307.32   42.28
   1 -19   8  449.46   55.07
  -1 -19  -8  493.19   44.98
   1  19  -8  357.81   36.20
  -1 -19  -8  349.51   38.18
  -1 -19   9   13.18   10.19
   1 -19  -9   26.05   15.06
  -1  19  -9   19.32   20.24
   1 -19  -9   16.27   13.76
   1 -19   9   34.29   19.77
  -1 -19  -9   14.19    9.84
  -1 -19  -9   31.20   20.74
   1  19  -9   38.18   14.73
  -1 -19  10  209.72   30.81
   1 -19 -10  336.28   36.28
  -1  19 -10  189.46   51.72
   1 -19 -10  190.19   31.93
   1 -19  10  245.36   40.33
  -1 -19 -10  271.20   34.27
   1  19 -10  267.53   36.40
  -1 -19 -10  228.59   36.33
  -1  19 -11   31.75   28.69
  -1 -19  11   24.02   21.60
   1 -19 -11   13.15   16.41
   1 -19 -11   46.46   21.65
  -1 -19 -11   30.57   12.89
  -1 -19 -11   24.38    9.79
   1 -19  11   52.96   18.01
   1  19 -11   24.85   29.96
  -1 -19  12   50.36   26.31
   1 -19 -12   65.37   32.98
   1 -19 -12   56.65   20.18
  -1  19 -12   61.83   37.36
  -1 -19 -12   11.63   13.91
  -1 -19 -12   35.72   25.66
   1  19 -12   39.80   32.75
  -1  19 -13   21.64   14.88
  -1 -19  13   18.03   15.68
   1 -19 -13   34.91   18.78
  -1 -19 -13   16.40   19.29
  -1 -19 -13    7.50    7.05
   1  19 -13   11.02   16.08
   1 -19  13   30.64   22.73
   1 -19 -14  243.70   35.32
  -1 -19  14  171.48   45.21
  -1  19 -14  201.57   34.53
   1 -19  14  276.40   47.16
  -1 -19 -14  186.95   33.58
  -1 -19 -14  243.78   34.13
   1  19 -14  201.28   37.60
  -1 -19  15   18.73   16.24
  -1  19 -15    4.77   12.18
   1 -19 -15   34.50   17.27
   1  19 -15   24.59   21.05
  -1 -19 -15   19.95    9.67
  -1 -19  16   47.11   27.86
   1 -19 -16   44.60   19.88
  -1  19 -16   28.98   29.50
   1 -19  16   66.23   33.02
  -1 -19 -16   18.18   13.63
   1  19 -16   23.27   27.99
  -1 -19  17   80.22   22.77
  -1  19 -17   40.05   22.52
   1 -19 -17   46.90   23.73
   1 -19  17   83.13   20.87
   1  19 -17   46.12   26.69
  -1 -19 -17   59.86   30.01
   1 -20   0   16.18   22.96
  -1 -20   0   25.00   17.39
  -1 -20   0   49.42   21.15
   1 -20   0   31.14    8.53
   1 -20  -1  135.94   28.28
   1 -20  -1  188.60   32.22
  -1 -20   1  179.42   30.33
  -1 -20   1  164.98   28.34
   1 -20   1  163.22   28.36
  -1 -20  -1  162.30   23.53
  -1 -20  -1  242.45   33.10
  -1  20  -2   20.58   22.07
   1 -20  -2   19.77   10.71
   1 -20  -2   26.02   20.67
  -1 -20   2   12.97   16.01
  -1 -20  -2   39.62   26.20
  -1 -20  -2   70.44   17.89
   1 -20   2   19.39   16.60
   1  20  -2   32.41   25.39
  -1 -20   3  294.41   31.08
   1 -20  -3  405.15   34.11
  -1  20  -3  296.00   55.23
   1 -20  -3  282.70   36.67
   1 -20   3  349.83   34.16
  -1 -20  -3  303.76   31.92
  -1 -20  -3  273.73   42.16
   1  20  -3  210.15   57.74
   1 -20  -4   21.02   13.85
  -1 -20   4    9.11    9.39
   1 -20  -4   21.50   10.28
  -1  20  -4   10.15   19.40
   1 -20   4   23.67   10.84
  -1 -20  -4   25.97   19.41
  -1 -20  -4   21.59    8.50
   1  20  -4   13.24   13.50
  -1  20  -5   24.66   21.20
  -1 -20   5   28.42   11.73
   1 -20  -5   18.79   15.94
   1 -20  -5   25.38   23.84
  -1 -20  -5   40.80   17.99
  -1 -20  -5   13.31    8.49
   1 -20   5   16.58   11.25
   1  20  -5   17.52   17.00
  -1 -20   6   31.24   14.09
   1 -20  -6   19.33    6.89
   1 -20  -6   18.85   18.60
  -1 -20  -6   41.06   20.93
   1 -20   6   25.69   22.72
  -1 -20  -6   46.82   21.28
   1  20  -6   10.69   13.85
  -1 -20   7  281.17   37.38
   1 -20  -7  336.15   35.80
  -1  20  -7  205.08   40.41
   1 -20  -7  229.64   36.82
   1 -20   7  252.44   34.73
  -1 -20  -7  274.37   37.43
   1  20  -7  214.18   31.35
  -1 -20  -7  171.75   25.87
  -1 -20   8   30.23   16.57
   1 -20  -8   44.70   24.16
   1 -20  -8   19.73   12.23
  -1  20  -8    9.76   15.34
   1 -20   8   19.78   18.06
  -1 -20  -8   14.10   21.46
  -1 -20  -8    9.39   10.11
   1  20  -8   16.92   13.77
   1 -20  -9   93.52   25.01
  -1 -20   9  153.96   34.08
   1 -20  -9  109.62   26.01
  -1  20  -9  129.68   62.21
  -1 -20  -9  100.41   29.22
   1 -20   9   81.61   39.43
  -1 -20  -9  125.34   31.58
   1  20  -9   73.76   50.89
  -1 -20  10   31.35   21.52
   1 -20 -10   38.52   17.07
   1 -20 -10   20.37   20.55
  -1  20 -10   27.13   21.51
   1 -20  10   10.34   13.64
  -1 -20 -10   52.26   21.67
  -1 -20 -10   13.19   13.38
   1  20 -10   14.46   18.93
  -1  20 -11   26.81   21.25
  -1 -20  11   25.61   20.71
   1 -20 -11   20.31   11.04
   1 -20 -11   13.84    9.49
  -1 -20 -11   21.67   13.02
  -1 -20 -11    6.95   17.77
   1 -20  11   28.45   17.33
  -1  20 -12   30.35   16.35
  -1 -20  12   75.91   25.11
   1 -20 -12   72.77   23.01
  -1 -20 -12   39.15   20.49
  -1 -20 -12   61.89   19.20
   1  20 -12   17.95   23.96
   1 -20  12   67.91   21.42
  -1 -20  13    8.74   12.88
  -1  20 -13   26.73   25.80
   1 -20  13   20.11   16.43
  -1 -20 -13   14.68   15.96
   1  20 -13   19.20   25.06
  -1 -20 -13    8.47    8.59
  -1 -20  14   31.40   23.40
   1 -20 -14   40.50   23.98
  -1  20 -14   40.24   20.37
   1 -20  14   31.52   14.07
  -1 -20 -14   39.54   18.53
   1  20 -14   22.23   20.52
  -1 -20  15  169.92   56.85
   1 -20 -15  121.49   32.25
  -1  20 -15  135.72   28.24
   1 -20  15  120.05   26.84
  -1 -20 -15  165.91   29.27
   1  20 -15  190.97   33.08
   1 -20 -16   25.43   15.85
  -1 -20  16   29.03   20.67
  -1  20 -16   34.44   32.55
   1 -20  16   32.13   16.40
   1  20 -16   23.47   15.48
  -1 -20 -16  160.67   84.47
  -1 -21   0   35.11   23.93
   1 -21   0   10.67   17.02
  -1 -21   0   12.46   14.65
   1 -21   0   29.57   32.27
   1 -21  -1  405.96   43.36
  -1 -21   1  417.31   45.01
   1 -21  -1  309.66   42.52
  -1 -21  -1  455.92   52.91
   1 -21   1  345.00   41.07
   1 -21   1  292.45   42.88
  -1 -21  -1  314.03   38.35
  -1  21  -2   70.59   74.12
   1 -21  -2  193.97   32.36
  -1 -21   2  179.48   31.52
   1 -21  -2  224.14   40.86
   1 -21   2  168.27   46.44
  -1 -21  -2  213.18   33.31
  -1 -21  -2  235.88   33.07
   1  21  -2  154.07   40.37
  -1  21  -3  461.68   48.17
   1 -21  -3  610.22   54.57
  -1 -21   3  483.43   49.47
   1 -21  -3  354.81   44.77
  -1 -21  -3  529.58   60.74
  -1 -21  -3  411.85   39.69
   1 -21   3  498.87   47.32
   1  21  -3  410.21   50.86
   1 -21  -4   30.58   15.39
  -1 -21   4   74.49   24.56
   1 -21  -4   88.36   32.15
  -1  21  -4   10.05   37.01
  -1 -21  -4   47.63   26.68
   1 -21   4   57.59   28.54
   1  21  -4   23.12   24.98
  -1 -21  -4   37.99   18.40
  -1 -21   5   60.53   36.52
   1 -21  -5   50.97   28.04
  -1  21  -5   91.93   41.76
   1 -21  -5   66.97   29.54
   1 -21   5   61.28   50.18
  -1 -21  -5   43.54   11.56
  -1 -21  -5   76.98   23.56
   1  21  -5   56.65   52.88
   1 -21  -6  134.30   26.60
  -1 -21   6  134.16   42.62
  -1  21  -6   53.54   54.39
   1 -21  -6   77.07   32.21
   1 -21   6  133.88   36.67
  -1 -21  -6   38.90   14.32
  -1 -21  -6   68.99   27.01
   1  21  -6  130.75   27.32
  -1 -21   7   19.44   21.48
   1 -21  -7   26.11   18.43
   1 -21  -7   31.54   30.74
  -1  21  -7   13.44   23.47
   1 -21   7   32.20    9.05
  -1 -21  -7   26.52   17.68
  -1 -21  -7   34.58   26.23
   1  21  -7   28.90   23.80
  -1 -21   8  234.83   31.73
   1 -21  -8  192.80   33.01
   1 -21  -8  201.78   33.39
  -1  21  -8  232.93   48.73
  -1 -21  -8  202.88   28.39
   1 -21   8  194.65   32.57
  -1 -21  -8  184.25   38.16
   1  21  -8  178.20   32.41
  -1 -21   9  124.07   74.67
   1 -21  -9   67.87   32.94
   1 -21  -9  118.73   27.59
  -1  21  -9   69.40   46.49
   1 -21   9   87.14   31.50
  -1 -21  -9   75.84   22.48
  -1 -21  -9  128.58   32.40
   1  21  -9   91.71   23.95
  -1  21 -10   75.53   27.01
  -1 -21  10   54.45   29.22
   1 -21 -10   56.74   18.31
   1 -21 -10   15.38   10.60
  -1 -21 -10   21.15   18.00
  -1 -21 -10   21.22   13.62
   1 -21  10   26.93   14.09
   1  21 -10   33.54   18.27
  -1 -21  11   44.28   24.57
  -1  21 -11    8.27   19.44
   1 -21 -11   32.05   22.66
   1 -21  11   26.97   15.90
  -1 -21 -11   19.61   14.33
  -1 -21 -11   25.44   20.82
   1  21 -11   32.29   15.78
  -1  21 -12   15.93   21.90
  -1 -21  12   16.72   17.08
   1 -21 -12   33.44   27.48
  -1 -21 -12   22.44   18.89
  -1 -21 -12   23.36   17.56
   1  21 -12   15.67   19.84
   1 -21  12   22.01   18.12
  -1 -21  13  414.74   58.50
   1 -21 -13  354.41   57.61
  -1  21 -13  548.32   75.11
   1 -21  13  327.89   49.22
  -1 -21 -13  331.27   52.25
   1  21 -13  396.01   64.54
   1 -21 -14  171.06   31.59
  -1 -21  14   98.18   29.39
  -1  21 -14  105.10   31.42
   1 -21  14  183.58   37.43
   1  21 -14  115.78   28.96
  -1 -21 -14   35.40   24.91
   1 -22   0   33.95   12.10
  -1 -22   0    5.22   14.36
  -1 -22   0   20.23    7.85
   1 -22   0   25.82   14.10
   1 -22  -1   16.80   22.47
  -1 -22   1   16.22   16.24
   1 -22  -1   15.61   15.71
   1 -22   1   10.72   16.94
  -1 -22  -1   24.55   12.20
  -1 -22  -1   25.68    8.79
   1  22  -1   12.22   17.68
  -1  22  -2  260.01   41.00
   1 -22  -2  254.34   62.21
  -1 -22   2  218.11   44.41
   1 -22  -2  253.23   41.86
   1 -22   2  274.03   32.34
  -1 -22  -2  154.79   30.23
  -1 -22  -2  269.88   35.12
   1  22  -2  214.50   36.00
   1 -22  -3   19.18   18.53
  -1  22  -3   25.84   32.38
  -1 -22   3   33.28   31.34
   1 -22  -3   11.14   10.80
  -1 -22  -3   26.13   16.69
  -1 -22  -3   16.17   10.24
   1  22  -3   10.85   11.52
   1 -22   3   34.34   30.64
  -1 -22   4   68.60   17.53
   1 -22  -4   48.08   34.12
  -1  22  -4  135.40   33.16
   1 -22  -4   50.48   29.08
  -1 -22  -4  104.07   30.09
   1 -22   4   58.71   23.68
   1  22  -4   51.75   40.89
  -1 -22  -4   69.36   26.76
   1 -22  -5   35.56   23.79
  -1 -22   5   29.68   26.90
   1 -22  -5    7.94   12.54
  -1  22  -5   22.83   24.82
  -1 -22  -5   48.88   18.45
   1 -22   5   27.32   14.32
   1  22  -5   15.77   17.22
  -1 -22  -5   24.73   16.86
   1 -22  -6   16.63   12.59
   1 -22  -6   40.40   26.55
  -1 -22   6   34.75   17.43
  -1  22  -6    8.74   10.27
   1 -22   6   46.20   24.95
  -1 -22  -6   57.79   20.10
  -1 -22  -6   38.92   19.52
   1  22  -6   34.62   19.63
   1 -22  -7   20.61   14.90
  -1 -22   7   26.92   12.39
  -1  22  -7    8.11   12.50
   1 -22   7   54.63   25.59
  -1 -22  -7   12.94   11.29
  -1 -22  -7   19.85    7.85
   1  22  -7   12.96   13.60
   1 -22  -8  131.04   26.05
  -1 -22   8  104.35   22.25
  -1  22  -8   80.07   31.40
   1 -22  -8   56.35   22.13
   1 -22   8  168.67   30.73
  -1 -22  -8  124.34   28.98
   1  22  -8   44.79   26.20
  -1 -22  -8   72.10   21.61
   1 -22  -9    1.30    6.42
   1 -22  -9   28.69   22.03
  -1 -22   9   10.28    8.40
  -1  22  -9   15.85   11.01
   1 -22   9   26.85   15.49
   1  22  -9   16.20   16.89
  -1 -22  -9    6.86   11.04
  -1  22 -10   15.88   19.15
  -1 -22  10   40.93   12.22
   1 -22 -10   37.52   24.08
  -1 -22 -10   44.86   21.22
  -1 -22 -10   23.18   15.91
   1  22 -10   10.43   17.80
   1 -22  10   24.92   25.85
  -1  22 -11   19.76   19.20
  -1 -22  11   16.37   13.17
   1 -22 -11   11.54   10.89
  -1 -22 -11   11.25   17.49
  -1 -22 -11   13.37   12.89
   1  22 -11    4.69    9.03
   1 -22  11   35.95    9.52
  -1  22 -12   12.79   17.74
  -1 -22  12   19.42   11.29
   1 -22 -12   24.17   19.41
   1 -22  12   14.60   12.45
   1  22 -12   28.66   23.04
  -1 -23   0   33.64   21.02
   1 -23   0   14.93   18.51
   1 -23   0   32.01   28.36
   1 -23  -1  172.46   26.93
  -1 -23   1  167.72   30.08
   1 -23  -1  152.60   29.71
  -1  23  -1  146.45   33.80
  -1 -23  -1  137.56   31.14
  -1 -23  -1  187.65   38.54
   1 -23   1  167.14   36.26
   1  23  -1  158.69   38.75
  -1  23  -2   69.19   52.23
   1 -23  -2   63.64   33.06
  -1 -23   2   91.90   26.02
  -1 -23  -2   89.63   31.96
   1 -23   2   96.90   28.53
   1  23  -2   67.53   38.92
  -1 -23  -2   58.56   21.22
  -1  23  -3  470.86   63.51
   1 -23  -3  600.70   45.08
  -1 -23   3  728.63   53.60
   1 -23  -3  523.30  333.46
   1 -23   3  548.28   42.96
  -1 -23  -3  568.94   44.19
  -1 -23  -3  484.55   38.78
   1  23  -3  515.16   56.12
   1 -23  -4  141.33   32.78
  -1 -23   4  142.04   28.02
   1 -23  -4  160.06   29.13
  -1  23  -4  165.97   64.26
   1 -23   4  247.06   36.56
  -1 -23  -4  153.18   29.56
  -1 -23  -4  162.92   25.86
   1  23  -4  128.48   40.33
  -1  23  -5   28.42   23.27
  -1 -23   5   47.56   25.40
   1 -23  -5   41.64   20.49
   1 -23  -5   30.51   18.14
   1 -23   5   90.35   34.97
  -1 -23  -5   34.86   20.81
  -1 -23  -5   43.69   16.78
   1  23  -5   58.99   22.54
  -1 -23   6   22.06   21.79
   1 -23  -6   23.20   23.08
  -1  23  -6   19.35   27.10
   1 -23  -6   26.74   18.72
   1 -23   6   18.73   18.60
  -1 -23  -6   30.82   17.44
   1  23  -6   10.25   19.82
  -1 -23  -6   30.47   15.68
   1 -23  -7  165.80   26.17
  -1 -23   7  146.60   39.33
  -1  23  -7   55.79   52.70
   1 -23  -7  124.88   31.66
   1 -23   7  112.53   31.36
  -1 -23  -7  128.47   30.07
  -1 -23  -7  224.96   27.19
   1  23  -7  188.19   41.80
  -1 -23   8  153.86   28.80
   1 -23  -8  151.55   25.01
   1 -23  -8  137.24   24.88
  -1  23  -8  121.35   32.34
   1 -23   8  139.72   31.34
  -1 -23  -8  114.46   31.90
  -1 -23  -8  188.14   29.43
   1  23  -8  117.47   47.95
  -1 -23   9  112.48   32.57
  -1  23  -9   49.77   46.07
   1 -23  -9   40.34   13.91
   1 -23   9   74.78   33.60
  -1 -23  -9   56.53   21.91
  -1 -23  -9   54.71   24.38
   1  23  -9   58.75   46.35
   1 -24   0   32.09   11.86
  -1 -24   0   39.86   17.10
   1  24   0   19.88   16.86
  -1 -24   1   24.53   24.38
  -1  24  -1   18.62   15.84
   1 -24  -1   33.26   18.04
   1 -24  -1   37.52   15.52
  -1 -24  -1   15.85   15.00
  -1 -24  -1   62.98   23.72
   1  24  -1   20.84   22.63
   1 -24   1   31.04   15.04
  -1 -24   2   34.65   18.00
  -1  24  -2   54.85   60.36
   1 -24  -2   84.54   19.35
   1 -24  -2   80.78   21.49
  -1 -24  -2   72.10   37.37
  -1 -24  -2   47.96   24.67
   1  24  -2   33.00   28.71
   1 -24   2   44.12   30.01
   1 -24  -3  106.74   29.65
   1 -24  -3  130.38   28.23
  -1 -24   3  191.33   39.22
  -1  24  -3  183.17   38.15
  -1 -24  -3  225.62   35.57
  -1 -24  -3  184.90   34.34
   1 -24   3  157.19   28.17
   1  24  -3  111.48   29.80
  -1 -24   4   37.92   26.37
   1 -24  -4   11.52   11.57
  -1  24  -4   16.03   17.57
   1 -24  -4   27.19   19.15
   1 -24   4   47.30   24.76
  -1 -24  -4   16.05   19.94
   1  24  -4   16.41   21.75
  -1 -24  -4   42.60   21.85
   1 -24  -5   50.78   23.27
  -1  24  -5   33.10   15.71
   1 -24  -5   40.74   17.62
  -1 -24   5   30.59   23.24
  -1 -24  -5   34.08   13.63
   1 -24   5   49.83   30.67
   1  24  -5   27.72   33.13
  -1 -24  -5   75.81   22.65
  -2   0  -2 2437.94   98.24
  -2   0  -3    7.10    6.06
  -2   0   3    1.76    1.74
   2   0  -3    0.75    1.81
   2   0  -3   29.44   15.19
  -2   0  -3    3.26    4.73
   2   0   3    4.43    4.92
  -2   0  -4 2303.03   94.77
   2   0   4 2246.42   92.19
  -2   0   4 2903.90  118.05
   2   0   4 2871.38  115.83
   2   0   5    5.90    6.98
  -2   0  -5    4.23    4.30
  -2   0   5    4.99    3.23
   2   0  -5    3.54    2.19
  -2   0  -5   12.08    9.46
  -2   0   5   17.13   11.71
   2   0  -5    1.51    2.38
   2   0   5    5.38    5.78
  -2   0  -6  307.23   27.22
   2   0   6  247.20   19.55
  -2   0   6  338.80   17.51
   2   0  -6  381.91   18.21
   2   0  -6  285.48   22.57
  -2   0   6  377.97   24.03
  -2   0  -6  314.32   27.19
   2   0   6  424.37   24.72
  -2   0  -7    7.49    7.75
   2   0   7   10.41    7.93
  -2   0   7   12.31    5.08
   2   0  -7   10.22    7.09
  -2   0  -7    8.98   11.55
  -2   0   7    7.45    7.65
   2   0   7    7.90   12.20
   2   0   8 1699.72   74.32
  -2   0  -8 1896.13   81.36
  -2   0   8 1786.75   74.60
   2   0  -8 2145.45   88.77
  -2   0   8 2197.74   93.45
   2   0  -8 2036.96   87.02
  -2   0  -8 1955.31   83.90
   2   0   8 2225.52   95.35
   2   0   9    4.61    5.05
  -2   0   9   15.14    6.86
  -2   0  -9    3.47    5.46
   2   0  -9    8.17    6.24
  -2   0  -9    9.08    8.47
  -2   0   9    4.43    5.90
   2   0  -9    1.43    7.70
   2   0   9    3.01    8.03
   2   0  10   13.10   12.14
  -2   0  10   16.44    7.71
   2   0 -10   23.11   13.08
  -2   0 -10   13.53    9.49
   2   0 -10    2.47    6.40
  -2   0  11    4.92    6.16
   2   0  11    2.91    6.83
   2   0 -11    7.67    5.14
  -2   0 -11    6.02    9.44
   2   0 -11   21.39    8.59
  -2   0  12  532.65   32.02
   2   0  12  552.76   36.00
   2   0 -12  732.73   41.74
  -2   0 -12  760.55   49.01
   2   0 -12  723.82   47.84
   2   0  13    7.87    6.02
  -2   0  13    8.03    6.48
   2   0 -13    8.79    5.99
   2   0 -13   19.34   17.55
  -2   0 -13   16.48   16.79
   2   0  14  412.93   32.88
  -2   0  14  352.93   24.89
  -2   0 -14  495.13   37.94
   2   0 -14  416.63   40.23
  -2   0  15    6.53    5.81
   2   0  15    5.48    5.49
   2   0 -15    2.86    7.35
  -2   0 -15    3.65   10.63
  -2   0  16 1404.18   57.79
   2   0  16 1535.97   65.72
   2   0 -16 1913.88   84.56
  -2   0 -16 1781.26   77.74
   2   0  17   16.27    7.85
  -2   0  17   12.53    5.72
   2   0 -17    5.34   10.14
  -2   0 -17   34.50   26.05
  -2   0  18   54.85   10.12
   2   0  18   54.84   11.20
   2   0 -18   47.73   16.10
  -2   0 -18   76.93   36.68
  -2   0  19   15.64    7.01
  -2   0 -19   28.28   17.24
  -2   0  20   73.11   12.92
  -2   0 -20   85.83   18.91
   2   0 -20  111.37   22.87
  -2   0 -20  103.93   46.81
  -2   0  21    7.52    4.01
  -2   0 -21   24.68   11.39
   2   0 -21   14.13    8.71
  -2   0 -21   21.15   14.90
  -2   0 -22    9.52   12.56
   2   0 -22    7.99   10.95
  -2   0 -22   18.54   20.85
  -2   0 -23   17.63   14.90
   2   0 -23    2.38    9.11
  -2   0 -23    6.51    9.93
  -2   0 -24   21.19   23.21
   2   0 -24   20.90   13.46
   2   0 -24   45.66   20.81
  -2   0 -24   29.03   25.76
  -2   0 -25   17.17   19.76
   2   0 -25   21.46   17.19
   2   0 -25   27.81   28.01
  -2   0 -25   19.76   17.08
  -2   0 -26   71.26   25.55
  -2   0 -26   76.03   26.11
   2   0 -26   24.35   24.83
  -2   0 -27   11.96   18.05
   2   0 -27   34.28   31.41
  -2   0 -27   18.85   14.69
  -2   0 -28  292.49   35.50
   2   0 -28  283.62   49.17
  -2   0 -28  378.89   47.87
  -2   1  -2    8.39    5.92
  -2  -1   2    3.60    2.27
  -2   1  -2    2.15    1.92
  -2  -1   2    6.85    4.06
   2  -1  -2    3.86    2.57
   2   1   2    3.73    4.13
   2  -1  -2    5.71    6.47
   2   1   2    3.60    3.97
  -2   1   2    5.22    2.68
  -2  -1  -2    4.64    6.33
  -2   1   2    7.16    4.90
  -2  -1  -2    3.36    3.52
   2   1  -2    3.09    4.26
   2  -1   2    9.01    4.52
   2   1  -2    4.08    4.66
   2  -1   2    4.99    4.87
  -2   1  -3  110.16   14.32
  -2   1  -3  109.27   11.03
  -2  -1   3  110.72    6.71
  -2  -1   3  145.90    7.92
   2   1   3  115.68   12.46
   2  -1  -3  115.96    4.20
   2   1   3  132.59   11.15
   2  -1  -3  102.17    9.66
   2   1  -3  144.11    7.83
  -2   1   3  102.84   10.47
  -2  -1  -3  121.75   12.34
   2   1  -3  103.70    8.62
  -2  -1  -3  107.32   13.32
   2  -1   3  116.39   49.54
  -2   1   3  121.50    4.69
   2  -1   3  111.34   10.98
  -2  -1   5 1365.77   60.92
  -2   1  -5 1169.14   52.14
  -2  -1   5 1227.81   51.37
  -2   1  -5 1294.10   56.88
   2  -1  -5 1219.15   53.18
   2   1   5 1300.55   55.97
   2  -1   5  975.24  223.04
  -2   1   5 1058.97   43.19
  -2  -1  -5 1154.27   50.82
   2   1  -5 1203.84   52.42
  -2   1   5 1314.14   58.34
   2   1  -5 1386.13   57.61
   2  -1   5 1357.58   58.69
  -2  -1  -5 1086.90   48.62
  -2  -1   6 3157.31  129.24
  -2   1  -6 2927.95  122.70
  -2   1  -6 2508.36  103.91
   2  -1  -6 2783.81  114.55
   2   1   6 2992.37  122.91
   2   1  -6 3084.81  124.26
   2  -1   6 2266.00   94.80
  -2   1   6 2932.90  121.09
   2   1  -6 2804.30  115.48
  -2  -1  -6 2807.84  115.58
  -2  -1  -6 2428.17  101.00
   2  -1   6 3042.45  125.30
  -2  -1  -6 2465.52  102.46
   2  -1  -7  291.19   15.66
  -2   1  -7  288.40   27.40
   2  -1  -7  268.12   26.10
  -2   1  -7  298.57   31.21
  -2  -1   7  280.53   17.76
   2   1   7  279.15   56.39
  -2  -1   7  242.08   61.79
   2   1  -7  326.83   17.98
  -2  -1  -7  229.49   23.52
  -2   1   7  212.63   13.68
  -2  -1  -7  288.45   63.62
  -2   1   7  276.87   18.24
   2  -1   7  220.14   92.01
  -2  -1  -7  254.73   25.58
   2  -1   7  240.54   21.67
   2   1  -7  252.86   21.40
   2  -1  -8  165.60   15.64
  -2   1  -8  173.07   18.71
  -2  -1   8  147.74   13.52
  -2  -1   8  151.31   12.12
  -2   1  -8  148.21   19.24
   2  -1  -8  131.34   13.76
   2   1   8  150.14   21.30
  -2  -1  -8  153.71   14.42
   2   1  -8  181.77   11.18
   2  -1   8  156.64   20.17
  -2  -1  -8  136.10   17.71
   2   1  -8  169.17   17.51
  -2  -1  -8  142.16   21.55
  -2   1   8  173.02   18.39
  -2   1   8  118.85    7.39
   2  -1   8  171.86   15.12
  -2   1  -9  104.65   14.23
   2   1   9  169.40   18.63
  -2  -1   9  103.35   15.32
  -2   1  -9  129.38   18.81
  -2  -1   9   96.88    9.73
   2  -1  -9  120.41   17.68
   2  -1  -9  123.70   10.60
  -2  -1  -9  107.18   21.12
   2   1  -9  157.78   24.62
  -2   1   9  105.40   12.98
   2   1  -9  108.37   16.84
  -2  -1  -9  159.45   15.95
  -2  -1  -9   94.33   17.04
   2  -1   9   96.90   15.90
  -2   1   9   97.89    7.89
   2  -1 -10  101.27   30.52
  -2  -1  10  101.83   11.07
   2  -1 -10   93.88   51.73
  -2   1 -10  101.90   13.76
   2  -1  10   94.27   15.88
  -2   1  10   96.29    9.81
   2   1 -10  148.20   12.48
  -2  -1 -10  124.26   18.90
   2   1 -10   95.34   16.69
   2  -1 -11 1026.63   53.96
  -2  -1  11  861.15   47.72
  -2   1 -11  832.32   52.59
  -2   1  11  700.28   39.20
   2   1 -11 1125.22   59.67
   2  -1  11  860.07   56.94
  -2  -1 -11  932.23   56.49
   2   1 -11 1023.50   59.27
  -2   1 -12  281.45   21.37
   2  -1 -12  335.02   21.97
  -2  -1  12  253.98   19.96
   2  -1 -12  342.46   27.86
   2   1 -12  359.41   19.57
  -2   1  12  275.03   18.79
   2  -1  12  266.44   25.67
  -2  -1 -12  319.90   26.90
   2   1 -12  319.32   24.29
  -2   1 -13  416.24   33.99
  -2  -1  13  301.00   21.69
   2  -1 -13  396.81   24.51
   2  -1 -13  304.31   29.74
   2  -1  13  347.57   27.16
  -2  -1 -13  255.86   24.98
  -2   1  13  235.36   19.18
  -2  -1 -13  320.88   24.67
   2   1 -13  288.49   79.34
   2  -1 -14   35.65   17.16
  -2  -1  14   25.79   13.16
   2  -1 -14   35.69   18.68
  -2   1 -14   41.71   28.85
   2  -1  14   36.13   10.24
  -2   1  14   44.25    8.12
  -2  -1 -14   24.47   10.72
  -2  -1 -14   38.52   19.52
   2   1 -14   31.15   23.80
  -2   1 -15   35.67   16.95
  -2  -1  15   46.35    9.59
   2  -1 -15   38.98   20.27
  -2   1  15   29.12   12.68
  -2  -1 -15   34.74   11.94
   2   1 -15   35.81   36.29
  -2  -1 -15   22.46   17.42
   2  -1  15   33.42   25.76
  -2  -1  16  584.61   40.93
  -2   1 -16  556.16   45.97
   2  -1 -16  585.09   61.48
  -2   1  16  511.51   40.11
  -2  -1 -16  549.10   54.05
   2  -1  16  582.57   47.90
  -2  -1 -16  530.17   42.28
   2   1 -16  548.14   53.23
  -2   1 -17 1410.81   72.71
  -2  -1  17 1182.74   55.34
   2  -1 -17 1413.74   70.60
   2  -1  17 1222.53   59.53
  -2  -1 -17 1006.20   80.39
  -2  -1 -17 1621.80   78.76
   2   1 -17 1471.00   74.04
  -2   1  17 1191.56   56.35
  -2  -1  18  272.04   23.86
   2  -1 -18  246.47   29.69
  -2   1 -18  259.00   28.60
   2  -1  18  218.87   26.35
  -2   1  18  225.02   18.13
  -2  -1 -18  384.60   39.19
  -2  -1 -18  249.05   48.04
   2   1 -18  266.69   27.20
   2  -1 -19  270.91   34.63
  -2  -1  19  183.29   16.92
  -2   1 -19  207.40   32.13
  -2   1  19  207.37   17.66
  -2  -1 -19  168.99   28.76
   2   1 -19  220.22   41.76
   2  -1  19  174.14   21.08
  -2  -1 -19  221.01   25.50
  -2   1 -20    2.91   12.13
  -2  -1  20   27.24    8.68
   2  -1 -20   22.64   21.81
  -2  -1 -20   14.50   12.80
   2   1 -20   32.02   15.48
  -2  -1 -20   19.30   20.80
   2  -1  20   10.34    5.08
  -2  -1  21  177.93   20.66
  -2   1 -21  236.48   43.28
   2  -1 -21  178.38   26.27
   2  -1 -21  201.62   22.19
   2   1 -21  210.23   28.34
  -2  -1 -21  177.98   23.63
  -2  -1 -21  199.53   41.54
   2  -1  21  189.95   22.89
  -2  -1  22  301.68   26.41
   2  -1 -22  309.96   28.05
   2  -1 -22  336.08   46.32
  -2   1 -22  287.10   39.34
  -2  -1 -22  273.90   32.81
   2   1 -22  471.76   47.34
  -2  -1  23  144.35   30.28
   2  -1 -23  188.67   46.03
   2  -1 -23  175.03   24.93
  -2   1 -23  172.71   25.00
  -2   1 -23  204.21   30.32
  -2  -1 -23  130.14   24.85
   2   1 -23  151.43   27.10
  -2  -1 -23  212.31   35.56
  -2  -1  24   19.33   10.46
   2  -1 -24   19.99   13.74
   2  -1 -24   22.60   20.44
  -2   1 -24   38.92   35.76
  -2  -1 -24   11.95   16.03
   2   1 -24   27.65   19.55
  -2  -1 -24   28.10   24.75
  -2  -1  25  113.87   22.00
   2  -1 -25   99.89   26.51
  -2   1 -25  147.35   32.12
   2  -1 -25  152.39   45.85
  -2   1 -25   73.32   51.09
  -2  -1 -25  110.94   22.31
  -2  -1 -25  137.54   27.07
   2   1 -25  100.27   33.76
  -2   1 -26   34.92   25.03
  -2   1 -26   24.79   19.78
   2  -1 -26   51.30   35.97
   2   1 -26   29.77   29.08
  -2  -1 -26   40.24   21.09
  -2  -1 -26   18.23   19.41
  -2   1 -27  410.09   52.53
   2  -1 -27  451.17   59.86
  -2   1 -27  421.67   42.67
  -2  -1 -27  406.22   41.06
  -2  -1 -27  444.61   41.01
  -2   1 -28   62.41   28.94
   2  -1 -28  124.32   30.68
  -2   1 -28  109.33   33.00
  -2  -1 -28   32.61   23.12
  -2  -1 -28   38.50   28.84
   2   1 -28   24.99   19.12
  -2   2   0   94.33    5.86
   2  -2   0   81.33   24.77
  -2  -2   0  117.64   10.63
   2   2   0  101.69    9.41
  -2  -2   0   67.50    8.82
   2  -2   0   45.78   21.69
   2   2   0   65.36    4.95
  -2   2   0   73.41    8.42
   2  -2  -1   88.12   10.68
   2   2   1  103.69    7.62
   2  -2  -1  120.72    5.44
  -2   2  -1  127.85   16.07
  -2  -2   1  169.76   10.18
  -2   2  -1  120.55    9.33
   2   2   1  149.14   10.21
  -2  -2  -1  139.78   14.11
   2   2  -1  129.70    9.17
   2   2  -1  101.87    7.46
   2  -2   1   98.01    9.33
  -2   2   1  104.80   14.37
   2  -2   1  124.51   20.33
  -2   2   1  121.36    5.00
  -2  -2  -1  119.75    6.48
   2   2  -1  114.99    6.41
   2  -2   2 2630.96  107.03
  -2   2  -3  185.86   54.16
   2   2   3  113.85    9.61
  -2  -2   3  117.55    8.62
  -2  -2   3  168.19   29.98
   2  -2  -3  101.62    9.56
   2   2   3  133.97    8.99
   2  -2   3  109.92   24.39
   2   2  -3  143.36   12.15
  -2   2   3  123.94   30.53
  -2  -2  -3  117.66   10.87
   2   2  -3  109.50   11.89
  -2  -2  -3  120.77   20.72
   2  -2  -4  999.18   44.46
  -2   2  -4  954.85   21.35
  -2  -2   4 1182.64   20.80
   2   2   4 1112.02   48.11
  -2   2  -4 1101.52   23.16
   2   2   4  996.47   44.77
  -2  -2   4 1103.98   19.44
   2  -2   4  930.16   57.10
  -2  -2  -4 1083.68   48.11
   2   2  -4 1208.55   51.15
  -2  -2  -4 1009.47   45.27
  -2   2   4 1063.04   49.65
   2   2  -4 1233.02   53.37
   2  -2   4 1160.35   50.37
  -2   2  -6  157.02   17.95
   2  -2  -6  148.77   47.56
  -2   2  -6  167.49   17.71
  -2  -2   6  154.98   14.37
   2  -2  -6  157.76   13.94
  -2  -2   6  169.36   14.23
   2   2   6  173.17   15.67
   2   2  -6  195.31   11.23
  -2   2   6  183.57   15.53
  -2  -2  -6  167.13   22.60
   2   2  -6  139.66   49.10
  -2  -2  -6  170.53   16.60
   2  -2   6  173.30   35.38
   2  -2   6  178.97   16.41
  -2   2  -7 2962.04  123.84
   2  -2  -7 2837.42  118.11
  -2   2  -7 2865.10  118.62
  -2  -2   7 2869.25  117.39
  -2  -2   7 3252.37  133.57
   2   2   7 3228.57  133.15
   2   2  -7 3289.30  133.41
   2  -2   7 2488.25  105.26
  -2   2   7 3168.85  130.59
  -2  -2  -7 2935.33  122.06
   2   2  -7 3001.62  124.21
  -2  -2  -7 2581.60  107.04
  -2  -2  -7 2736.76  113.08
   2  -2   7 3265.89  134.88
  -2   2  -8  204.17   26.24
  -2  -2   8  243.14   16.09
  -2   2  -8  181.03   16.82
   2  -2  -8  170.64   11.36
  -2  -2   8  209.21   14.11
   2  -2  -8  162.81   17.78
   2   2   8  243.58   18.27
  -2  -2  -8  176.23   14.24
  -2  -2  -8  152.45   20.14
  -2  -2  -8  178.58   18.71
  -2   2   8  195.71   14.79
   2   2  -8  191.81   22.19
   2  -2   8  193.78   14.40
   2  -2   8  145.71   16.55
  -2   2   8  154.59    8.50
   2  -2  -9   41.10    6.64
  -2  -2   9   48.62   11.01
   2  -2  -9   30.34   22.96
  -2   2  -9   55.68   18.68
  -2  -2   9   37.85    8.13
   2  -2   9   33.10   12.97
  -2  -2  -9   37.20   21.25
  -2  -2  -9   31.93   20.83
  -2   2   9   19.62    5.64
   2   2  -9   34.93   17.20
  -2  -2  -9   42.78   16.29
   2   2  -9   53.74    9.70
   2  -2 -10 1114.40   48.55
  -2  -2  10  995.57   52.15
   2  -2 -10 1083.89   59.98
  -2   2 -10 1158.12   64.57
   2  -2  10  901.50   50.54
   2   2 -10 1261.40   26.28
  -2  -2 -10 1046.38   36.08
  -2  -2 -10 1028.61   55.94
   2   2 -10 1093.29   59.86
   2  -2 -11  479.06   52.84
   2  -2 -11  562.67   31.91
  -2  -2  11  487.44   32.02
  -2   2 -11  580.08   40.95
  -2   2  11  384.61   27.12
   2   2 -11  669.89   46.07
  -2  -2 -11  435.59   72.98
  -2  -2 -11  483.69   36.26
   2   2 -11  491.56   48.54
   2  -2  11  425.40   29.34
   2  -2 -12  592.08   49.30
  -2   2 -12  454.50   33.07
  -2  -2  12  564.18   36.58
   2  -2 -12  447.80   82.45
  -2   2  12  398.89   26.04
  -2  -2 -12  403.33   37.20
  -2  -2 -12  615.70   42.48
   2  -2  12  529.61   35.43
   2   2 -12  533.51   38.50
  -2  -2  13   37.36   13.62
   2  -2 -13   29.00    6.82
   2  -2 -13   16.86   22.81
  -2   2 -13   15.87   16.70
   2  -2  13   27.95   12.90
  -2   2  13   28.96    6.52
  -2  -2 -13   13.36   11.34
  -2  -2 -13   30.72   13.02
   2   2 -13   26.45   15.08
   2  -2 -14  272.62   20.11
  -2   2 -14  298.79   34.13
  -2  -2  14  169.23   18.36
   2  -2 -14  190.54   25.21
  -2   2  14  174.73   13.80
  -2  -2 -14  204.73   24.84
  -2  -2 -14  259.73   31.19
   2  -2  14  169.59   23.65
   2   2 -14  180.42   20.93
  -2  -2  15   12.59    7.09
  -2   2 -15    4.21    8.97
   2  -2  15    8.13    5.27
  -2  -2 -15    8.93   10.17
   2   2 -15   21.37   17.42
  -2  -2 -15    3.03    5.53
  -2  -2  16  163.95   15.80
   2  -2 -16  159.95   25.09
  -2   2 -16  217.16   24.66
  -2  -2 -16  171.93   20.40
   2  -2  16  161.73   26.02
  -2  -2 -16  157.29   22.10
   2   2 -16  121.81   64.14
   2  -2 -17   61.97   14.93
  -2  -2  17   61.70   14.08
   2  -2 -17   79.42   19.91
  -2   2 -17   66.76   51.75
   2  -2  17   78.86   16.87
  -2  -2 -17  102.86   20.07
   2   2 -17   58.32   37.19
  -2  -2 -17   48.80   18.24
  -2   2 -18   10.36   10.99
  -2  -2  18   17.45   10.11
   2  -2 -18    6.85    8.46
   2  -2 -18    7.28    9.81
  -2  -2 -18   14.04    6.09
  -2  -2 -18   12.39   21.37
   2  -2  18    9.64    9.00
   2   2 -18    7.80   19.18
  -2  -2  19   16.37    7.30
   2  -2 -19   17.96   22.16
   2  -2 -19   18.27    9.11
  -2   2 -19   27.62   10.76
  -2  -2 -19   17.67   19.91
  -2  -2 -19   14.63   16.92
   2   2 -19   18.56   20.11
  -2  -2  20   25.35   13.79
   2  -2 -20   17.70   21.77
   2  -2 -20   31.75   22.69
  -2   2 -20   10.56   18.70
   2  -2  20    8.39   10.42
  -2  -2 -20   10.67   19.15
  -2  -2 -20   25.44   13.16
   2   2 -20   11.11   15.17
  -2  -2  21  114.94   14.93
  -2   2 -21  123.14   29.73
   2  -2 -21   88.68   31.65
   2  -2 -21  115.92   17.80
  -2  -2 -21  111.53   60.78
  -2  -2 -21  122.69   20.29
   2   2 -21  136.28   30.82
   2  -2  21  103.67   24.79
   2  -2 -22   20.43   14.85
  -2  -2  22   34.37   12.42
   2  -2 -22   25.96   23.42
  -2   2 -22   11.73   11.22
   2  -2  22   59.68   15.43
  -2  -2 -22   18.21   16.95
  -2  -2 -22   35.65   16.00
   2   2 -22   32.70   38.04
   2  -2 -23   23.29   31.93
  -2  -2  23   38.19   13.30
   2  -2 -23   19.73    9.50
  -2   2 -23   42.84   30.47
  -2  -2 -23   11.64   17.01
  -2  -2 -23   21.19   12.65
   2  -2  23   23.86   10.60
   2   2 -23   38.91   11.57
  -2  -2  24   32.15   13.20
   2  -2 -24    9.67   16.49
  -2   2 -24   16.53   11.83
   2  -2 -24   22.87   21.84
   2  -2  24   35.73   14.35
  -2  -2 -24   22.35   12.36
  -2  -2 -24   18.24   28.15
   2   2 -24   26.17   25.13
  -2  -2  25   26.95    9.33
  -2   2 -25   32.99   29.50
  -2   2 -25   13.66   13.68
   2  -2 -25    5.02   17.53
  -2  -2 -25   13.56   16.66
  -2  -2 -25   25.95   17.42
   2   2 -25   23.77   16.46
  -2  -2  26   16.58    6.61
   2  -2 -26   28.90   30.11
  -2   2 -26   27.42   26.58
  -2   2 -26   14.16   10.39
  -2  -2 -26    9.96   18.27
   2   2 -26   17.95   13.72
  -2  -2 -26   20.35   15.42
  -2   2 -27   54.97   29.93
   2  -2 -27  124.07   40.70
  -2   2 -27  119.42   33.37
  -2  -2 -27   98.77   36.58
  -2  -2 -27   74.17   26.39
   2   2 -27  154.02   31.26
   2  -2 -28  114.50   35.18
  -2   2 -28   71.08   22.95
  -2   2 -28   64.75   46.93
  -2  -2 -28   53.41   31.61
   2   2 -28   54.75   30.32
  -2  -2 -28   91.57   46.88
  -2   3  -2 3615.78  145.53
  -2   3  -3   53.82   21.49
   2   3   3   51.24    7.88
  -2  -3   3   56.93   26.90
   2   3   3   25.34   16.07
  -2  -3   3   49.79    8.15
  -2   3  -3   51.28   17.94
   2  -3  -3   40.24    8.44
   2  -3   3   65.64   17.97
  -2  -3  -3   35.40   17.74
   2   3  -3   47.61    8.57
  -2   3   3   41.85    3.29
  -2  -3  -3   34.98   14.76
  -2   3   3   33.74   14.23
   2   3  -3   53.87    8.37
   2  -3   3   60.48    9.49
  -2   3  -5 2456.75  102.96
   2   3   5 3029.97  123.69
  -2  -3   5 2928.94  119.46
   2  -3  -5 2584.53  107.46
   2   3   5 2606.56  107.44
  -2  -3   5 3113.66  127.24
  -2   3  -5 2813.30  115.95
  -2  -3  -5 2665.71  109.86
   2  -3   5 2426.16  101.38
   2   3  -5 3245.56  132.18
   2   3  -5 2903.40  118.79
  -2   3   5 2880.74  119.73
  -2  -3  -5 2764.22  112.97
   2  -3   5 2904.71  119.34
  -2   3  -7   55.15   21.87
  -2   3  -7   70.27   15.51
   2  -3  -7   52.33    6.75
  -2  -3   7   82.99   13.21
   2  -3  -7   63.41   12.48
   2   3   7   59.69   15.20
   2  -3  -7   68.47    5.66
   2   3   7   53.27   11.99
  -2  -3   7   65.92   17.45
  -2  -3  -7   43.76   11.17
   2   3  -7   94.94   11.92
  -2  -3  -7   60.68   12.03
   2   3  -7   57.92   25.44
   2  -3   7   51.69   28.90
  -2   3   7   70.10   10.13
   2  -3   7   70.52   13.85
  -2   3  -8  167.09   17.72
  -2  -3   8  211.46   26.73
  -2   3  -8  248.23   30.03
   2  -3  -8  192.78    9.08
   2   3   8  235.27   18.15
   2  -3  -8  194.40    8.97
   2  -3  -8  184.95   15.80
  -2  -3   8  198.93   14.11
   2  -3   8  225.94   28.38
  -2  -3  -8  186.60   16.63
  -2   3   8  194.64   15.23
  -2  -3  -8  175.54   16.96
  -2  -3  -8  200.34   14.12
   2   3  -8  212.25   17.24
   2   3  -8  272.33   14.72
   2  -3   8  171.51   21.24
   2  -3  -9   24.56   15.11
   2  -3  -9   16.00    7.11
  -2  -3   9   11.10    5.89
  -2   3  -9   17.65   18.20
  -2  -3  -9   23.12    7.28
   2   3  -9   19.51   10.65
  -2  -3  -9   21.12   17.77
  -2  -3  -9   13.65    6.59
   2   3  -9   13.68    7.21
   2  -3   9   13.44   12.51
  -2   3 -10 1682.29   78.18
   2  -3 -10 1608.05   68.14
  -2  -3  10 1516.12   68.00
   2  -3 -10 1567.21   72.94
   2  -3 -10 1307.56   56.30
   2  -3  10 1354.43   63.00
  -2  -3 -10 1580.76   72.33
  -2  -3 -10 1449.08   66.79
   2   3 -10 1653.62   75.67
   2   3 -10 1883.50   81.82
   2  -3 -11  124.58   17.00
  -2  -3  11  125.69   15.85
   2  -3 -11  154.00   11.99
   2  -3 -11  164.51   20.81
  -2   3 -11  170.10   23.94
   2  -3  11  146.46   27.98
  -2  -3 -11   93.83   38.77
  -2  -3 -11  177.91   66.05
   2   3 -11  160.99   19.02
  -2  -3  12 2908.16  124.72
   2  -3 -12 3129.43  130.16
   2  -3 -12 2474.89  104.39
   2  -3 -12 3064.29  134.02
  -2   3 -12 3198.78  139.37
   2  -3  12 2955.33  130.49
  -2  -3 -12 2674.73  115.65
  -2  -3 -12 2930.21  128.36
   2   3 -12 3250.46  141.14
  -2  -3  13   43.25   10.40
   2  -3 -13   38.02    6.87
   2  -3 -13   25.54   12.01
   2  -3 -13   33.17   20.57
  -2   3 -13   38.30   16.76
   2  -3  13   23.60   16.22
  -2  -3 -13   28.29   15.45
  -2  -3 -13   21.91   18.52
   2   3 -13   32.28   14.33
  -2   3 -14    4.61    6.89
   2  -3 -14   12.42    7.62
   2  -3 -14   27.35   14.71
   2  -3 -14    4.23    5.89
  -2  -3 -14   27.16   20.40
  -2  -3 -14   16.95   16.18
   2  -3  14   12.92    7.82
   2   3 -14   18.89   14.32
   2  -3 -15    5.34    7.46
  -2  -3  15    8.40    8.03
   2  -3 -15    2.42    5.31
  -2   3 -15   23.53   13.60
   2  -3 -15   32.30   18.23
   2  -3  15    6.87    9.13
   2   3 -15   21.49   13.06
  -2  -3 -15   10.07    5.70
  -2   3 -16 1587.41   72.02
  -2  -3  16 1479.42   63.38
   2  -3 -16 1566.65   70.92
  -2  -3 -16 1539.67   66.12
  -2  -3 -16 1606.16   70.91
   2   3 -16 1662.46   76.44
   2  -3  16 1424.98   64.47
  -2  -3  17   41.55   23.17
   2  -3 -17   51.10   42.27
   2  -3 -17   83.32   35.87
  -2   3 -17   92.81   27.20
   2  -3  17   63.87   17.61
  -2  -3 -17   53.51   27.47
  -2  -3 -17   41.26   31.43
   2   3 -17   69.85   27.78
  -2  -3  18 1142.70   54.15
   2  -3 -18 1024.92   46.25
   2  -3 -18 1162.96   58.12
  -2   3 -18 1298.69   65.45
   2  -3  18 1069.00   56.27
  -2  -3 -18 1171.20   60.77
   2   3 -18 1439.55   71.33
  -2   3 -19   26.73   10.72
  -2  -3  19   13.85    7.59
   2  -3 -19   10.60   14.53
   2  -3 -19   16.43   11.80
  -2  -3 -19   26.02   19.32
   2   3 -19   29.95   23.60
   2  -3  19   15.17    7.83
   2  -3 -20   19.57   12.22
  -2  -3  20   27.04   10.59
  -2   3 -20   23.29   15.52
   2  -3 -20   20.76   19.79
   2  -3  20   13.94    9.55
  -2  -3 -20   13.84   10.33
   2   3 -20   30.38   13.95
   2  -3 -21   60.93   15.72
  -2  -3  21   69.83   11.89
   2  -3 -21  138.28   32.24
  -2   3 -21   61.33   26.67
  -2  -3 -21   55.55   33.63
   2  -3  21   96.38   18.96
  -2  -3 -21  127.58   38.60
   2   3 -21   95.97   38.05
  -2  -3  22 1171.91   64.98
  -2   3 -22 1543.63   89.83
   2  -3 -22 1149.15   61.32
   2  -3 -22 1372.31   81.72
  -2  -3 -22 1285.53   72.06
  -2  -3 -22 1388.65   81.00
   2   3 -22 1508.47   88.17
   2  -3  22 1233.62   74.90
  -2  -3  23  119.49   14.96
  -2   3 -23   56.65   52.50
   2  -3 -23  100.20   16.57
   2  -3 -23  113.64   30.53
  -2  -3 -23  103.16   27.53
  -2  -3 -23  100.75   22.80
   2   3 -23   70.98   29.24
   2  -3  23   61.59   20.67
  -2   3 -24   75.25   23.83
  -2  -3  24  107.30   18.34
   2  -3 -24  135.18   30.99
  -2  -3 -24  117.66   20.49
   2   3 -24   94.25   35.09
  -2  -3 -24   54.89   22.02
   2  -3  24  104.53   19.88
  -2  -3  25   46.95   15.03
   2  -3 -25   35.40   31.16
  -2   3 -25   49.61   24.40
   2  -3  25   29.90    8.73
  -2  -3 -25   26.82   12.95
  -2  -3 -25   75.76   21.44
   2   3 -25   72.16   31.60
  -2   3 -26  183.57   30.73
  -2  -3  26  194.70   23.36
   2  -3 -26  149.48   33.88
  -2  -3 -26  228.87   49.04
   2   3 -26  207.71   34.95
  -2  -3 -26  143.70   30.75
   2  -3  26  151.25   24.65
   2  -3 -27   33.42   39.66
  -2   3 -27   49.28   15.16
  -2   3 -27   29.11   26.38
  -2  -3 -27   65.05   17.98
  -2  -3 -27   10.15   16.84
   2   3 -27   43.11   26.25
  -2   3 -28  207.98   36.70
  -2   3 -28  340.19   46.88
   2  -3 -28  336.91   53.92
  -2  -3 -28  273.58   48.63
   2   3 -28  346.81   48.17
  -2   4   0  562.22   26.10
   2  -4   0  496.50   23.42
  -2  -4   0  514.82   26.68
   2   4   0  581.36   29.40
  -2  -4   0  420.33   21.25
   2  -4   0  409.35   47.55
  -2   4   0  441.04   24.72
   2   4   0  470.63   23.09
  -2   4  -1 3836.81  154.03
  -2   4  -1 3178.18  129.14
   2   4   1 4138.65  166.59
   2  -4  -1 3020.64  123.15
   2   4  -1 4195.98  169.48
   2  -4   1 3098.01  126.94
  -2  -4  -1 3977.62  160.23
  -2   4   1 3126.66  127.00
   2   4   2  240.03   14.67
  -2   4  -2  275.76   22.39
   2  -4  -2  292.97   15.50
   2   4   2  297.00   19.14
  -2  -4   2  335.03   20.65
   2  -4  -2  211.85   18.85
  -2   4  -2  232.27   19.27
  -2   4   2  331.52   16.34
  -2  -4  -2  312.03   21.94
   2   4  -2  232.68   16.18
  -2  -4  -2  216.93   19.12
   2   4  -2  342.83   24.82
   2  -4   2  245.23   16.20
  -2   4   2  231.58   16.61
   2   4   3  679.40   32.85
  -2   4  -3  700.10   33.22
   2  -4  -3  673.34   28.94
  -2  -4   3  584.88   27.93
  -2  -4   3  682.16   32.71
   2   4   3  653.38   30.67
   2  -4  -3  560.09   29.93
  -2   4  -3  583.20   29.41
  -2   4  -3  576.01   28.98
   2  -4   3  586.74   29.78
  -2  -4  -3  563.99   27.60
  -2  -4  -3  643.45   32.20
  -2   4   3  617.98   30.82
   2   4  -3  651.11   36.12
  -2   4   3  702.24   29.59
   2   4  -3  834.88   39.67
  -2   4  -4  152.63   17.07
   2  -4  -4  147.54    7.06
  -2  -4   4  157.34   16.10
   2   4   4  140.16   16.72
   2   4   4  121.74   16.51
  -2  -4   4  119.72   13.24
   2  -4  -4  120.12   37.03
   2   4  -4  171.80   14.15
  -2  -4  -4  130.20   15.44
  -2   4   4  150.21   18.51
  -2  -4  -4  163.56   15.93
  -2   4   4  119.19    6.94
   2  -4   4  180.22   27.00
   2   4  -4  133.44   14.06
   2  -4   4  105.46   11.54
   2   4   5  103.14   42.60
  -2  -4   5  132.21   14.09
  -2   4  -5  139.29   18.25
  -2   4  -5  102.66   16.47
   2  -4  -5  117.62    6.36
   2   4   5  109.69   12.89
   2  -4  -5  102.80   14.74
  -2  -4   5  109.45   11.54
  -2   4   5  104.45    5.14
   2  -4   5  104.95   16.08
  -2   4   5  110.13   12.89
  -2  -4  -5  119.11   15.37
   2   4  -5  122.80   60.33
   2  -4   5  127.19   15.66
  -2  -4  -5  144.70   14.71
   2   4  -5  124.40   18.13
  -2   4  -6  819.67   43.22
  -2   4  -6  883.18   41.80
  -2  -4   6  748.58   36.60
   2   4   6  811.53   39.66
   2  -4  -6  578.08   45.01
   2   4   6  607.05   41.17
  -2  -4   6  817.00   39.81
  -2   4   6  634.57   26.78
  -2  -4  -6  694.41   35.89
   2   4  -6  930.20   43.15
  -2  -4  -6  773.67   37.74
   2   4  -6  839.31   42.35
   2  -4   6  695.45   36.70
   2  -4   6  815.00   40.07
  -2   4   6  805.68   40.58
   2  -4  -7  220.05   14.64
   2   4   7  261.18   20.70
  -2   4  -7  287.02   21.68
  -2  -4   7  235.66   22.27
   2  -4  -7  264.74   15.81
   2   4   7  189.20   12.27
   2  -4  -7  226.48   29.24
  -2  -4   7  240.12   19.18
  -2   4  -7  237.32   28.22
   2  -4   7  267.73   22.69
  -2  -4  -7  214.01   17.95
   2   4  -7  319.99   21.82
  -2   4   7  267.80   24.66
   2   4  -7  265.38   22.31
   2  -4   7  265.16   27.89
  -2  -4  -7  225.28   17.21
   2  -4  -8    1.45    4.35
  -2  -4   8    8.14    9.93
   2  -4  -8   12.95   18.33
  -2   4  -8    7.62   11.38
  -2  -4   8    3.13    5.03
   2   4   8    4.45   10.00
   2   4  -8   12.17    8.87
   2  -4   8    7.12    8.23
   2   4  -8    6.86    9.67
  -2  -4  -8    9.13   10.06
  -2  -4  -8    9.73    7.62
   2  -4  -9  138.45    8.26
   2  -4  -9  153.79   20.61
  -2  -4   9  184.19   17.14
  -2   4  -9  198.76   67.07
   2  -4  -9  131.24   10.53
  -2  -4  -9  136.10   14.11
  -2  -4  -9  161.34   16.77
   2  -4   9  166.44   19.06
   2   4  -9  146.70   21.37
   2   4  -9  206.35   20.49
   2  -4 -10   14.46    4.82
  -2  -4  10   13.79    8.15
   2  -4 -10    6.71    4.75
   2  -4 -10    0.37    9.89
  -2   4 -10   11.20   10.16
   2  -4  10   24.15    9.81
  -2  -4 -10   16.54   10.72
  -2  -4 -10    9.11   11.80
   2   4 -10   13.21   10.50
  -2  -4  11 1980.89   88.66
   2  -4 -11 1937.32   81.78
   2  -4 -11 1722.67   73.54
  -2   4 -11 1997.32   91.96
   2  -4 -11 2013.00   91.90
   2  -4  11 1844.36   85.55
  -2  -4 -11 1876.17   83.42
   2   4 -11 2062.02   93.13
  -2  -4 -11 2109.80   95.56
   2  -4 -12  175.59   27.56
   2  -4 -12  282.22   18.33
  -2  -4  12  276.99   26.68
   2  -4 -12  248.58   28.65
  -2   4 -12  234.34   32.14
   2  -4  12  281.95   27.75
  -2  -4 -12  236.37   34.28
  -2  -4 -12  265.96   28.87
   2   4 -12  243.26   24.26
  -2  -4  13  826.32   45.45
   2  -4 -13  633.85   34.16
   2  -4 -13  802.57   48.78
  -2   4 -13  860.15   51.44
   2  -4  13  649.34   40.83
  -2  -4 -13  585.29   55.74
  -2  -4 -13  665.37   40.47
   2   4 -13  667.23   41.38
   2  -4 -14   30.90    8.88
   2  -4 -14   50.28    6.18
  -2  -4  14   67.74   13.95
  -2   4 -14   37.46   24.28
   2  -4 -14   45.87   13.11
   2  -4  14   67.01   17.12
  -2  -4 -14   62.77   25.38
  -2  -4 -14   38.21   12.34
   2   4 -14   35.40   18.24
   2  -4 -15  612.80   41.96
  -2  -4  15  699.03   27.89
   2  -4 -15  751.47   42.70
  -2   4 -15  736.37   55.54
  -2  -4 -15  565.75   47.22
   2  -4  15  707.15   43.10
  -2  -4 -15  688.20   51.43
   2   4 -15  874.20   49.51
  -2   4 -16   15.75   14.55
   2  -4 -16    3.31    3.20
   2  -4 -16   10.17   11.87
   2  -4 -16   18.35   14.77
  -2  -4 -16    5.44    8.37
  -2  -4 -16   18.56   22.49
   2  -4  16   29.95   13.96
   2   4 -16   24.06   20.93
  -2  -4  17   19.95   11.65
   2  -4 -17   25.31   15.21
   2  -4 -17   22.18   13.36
  -2   4 -17    7.98    7.23
   2  -4  17   22.93   11.04
  -2  -4 -17   30.64   17.19
  -2  -4 -17   24.21   15.48
   2   4 -17    3.08    8.31
  -2   4 -18  429.25   37.03
  -2  -4  18  350.40   31.24
   2  -4 -18  313.90   26.57
  -2  -4 -18  364.36   37.91
  -2  -4 -18  365.89   36.37
   2   4 -18  488.31   46.03
   2  -4  18  350.25   35.05
  -2   4 -19   14.99   15.54
  -2  -4  19   16.53    7.81
   2  -4 -19   23.89   18.62
   2  -4 -19    3.96    8.15
  -2  -4 -19    9.41    8.70
  -2  -4 -19   12.62    9.84
   2  -4  19   20.83   12.72
   2   4 -19   19.32   25.86
  -2  -4  20  119.80   19.93
  -2   4 -20  108.15   27.08
   2  -4 -20  143.76   31.46
   2  -4 -20  132.84   16.13
  -2  -4 -20   89.99   18.33
  -2  -4 -20  121.69   27.03
   2   4 -20  122.62   34.57
   2  -4  20  156.54   20.32
  -2  -4  21   40.51   13.08
   2  -4 -21    9.49   20.90
   2  -4 -21    9.44    9.43
  -2   4 -21   35.00   22.33
   2  -4  21   13.78    8.73
  -2  -4 -21   11.98    8.13
  -2  -4 -21    7.44   12.09
   2   4 -21   26.20   22.94
  -2  -4  22  116.72   18.89
   2  -4 -22   63.02   55.46
   2  -4 -22  113.91   19.84
  -2   4 -22  194.06   39.84
   2  -4  22  149.68   32.87
  -2  -4 -22  145.93   27.88
  -2  -4 -22   93.71   22.41
   2   4 -22  116.55   29.33
  -2  -4  23   79.37   18.66
   2  -4 -23   55.77   16.10
   2  -4 -23   36.09   40.53
  -2   4 -23   58.38   38.52
   2  -4  23   61.86   17.42
  -2  -4 -23   26.23   22.47
  -2  -4 -23   32.64   22.80
   2   4 -23  128.01   29.72
  -2   4 -24  127.96   37.55
  -2  -4  24   76.80   18.46
   2  -4 -24   88.75   47.63
  -2  -4 -24   55.67   24.12
  -2  -4 -24   57.10   25.00
   2   4 -24   62.90   34.15
   2  -4  24   76.92   15.40
  -2  -4  25   28.90   10.73
   2  -4 -25   13.39   15.06
  -2   4 -25   32.61   17.01
  -2  -4 -25   17.46   12.41
   2  -4  25   20.23    5.28
   2   4 -25   36.73   28.82
  -2  -4 -25   34.60   23.80
  -2  -4  26   25.36   11.48
  -2   4 -26   31.65   16.43
   2  -4  26   12.89   13.34
  -2  -4 -26   50.30   20.48
   2   4 -26   20.44   12.42
  -2  -4 -26    9.84   10.01
  -2   4 -27   97.30   47.78
  -2  -4  27   23.62   18.67
   2  -4 -27   24.26   22.42
  -2  -4 -27   54.10   21.02
  -2  -4 -27   39.22   14.82
   2   4 -27   42.39   23.91
   2  -4  27   82.69   18.75
  -2   4 -28   36.31   29.71
   2   4 -28   10.59   13.97
  -2  -4 -28   20.88   20.14
   2  -5   0  158.00   21.95
  -2   5   0  110.10   16.43
   2   5   0  121.17   17.57
  -2  -5   0  102.49   13.35
   2  -5   0   94.49   15.49
  -2  -5   0   90.21   16.16
   2   5   0   78.59   10.09
  -2   5   0   82.48   10.21
  -2  -5   1 2738.72  113.36
  -2   5  -1 2729.67  111.56
   2  -5  -1 2487.01  101.00
  -2   5  -1 2096.87   87.79
   2   5   1 2759.77  113.61
  -2  -5   1 2094.65   86.53
   2   5   1 2185.03   89.78
   2  -5  -1 1964.58   83.36
  -2   5   1 2834.45  114.72
   2  -5   1 2381.26   97.88
   2   5  -1 2142.02   88.16
   2   5  -1 2936.87  120.77
  -2  -5  -1 2695.88  111.92
  -2  -5  -1 2079.52   86.09
   2  -5   1 2123.53   91.10
  -2   5   1 2118.12   88.48
  -2  -5   2   26.58   16.13
   2  -5  -2   45.24    8.87
  -2   5  -2   37.80   18.37
   2   5   2   45.01    9.11
   2  -5  -2   32.54   18.33
   2   5   2   21.02    7.33
  -2   5  -2   20.68   10.83
   2  -5   2   38.97    9.52
  -2  -5  -2   39.58   14.12
   2  -5   2   28.01   20.14
  -2   5   2   33.05   20.70
   2   5  -2   70.05   14.43
  -2  -5  -2   38.66    7.48
   2   5  -2   35.70   10.54
  -2   5   2   27.89   16.85
   2   5  -2   28.45    6.73
  -2  -5   3  648.62   36.82
  -2   5  -3  552.07   28.46
   2  -5  -3  632.29   28.33
  -2   5  -3  529.30   28.53
   2  -5  -3  445.75   37.38
  -2   5  -3  523.21   29.94
   2   5   3  623.75   31.60
   2   5   3  519.44   26.24
  -2   5   3  675.42   30.20
   2   5  -3  524.53   26.81
   2  -5   3  573.88   29.77
  -2   5   3  495.16   27.13
  -2  -5  -3  583.44   31.52
   2   5  -3  677.93   65.80
   2   5  -3  570.12   31.45
  -2  -5  -3  470.77   25.25
   2   5   4 1835.25   78.32
  -2   5  -4 1879.58   80.05
  -2  -5   4 1734.84   73.27
  -2  -5   4 1974.56   84.21
   2  -5  -4 1420.41   63.29
   2   5   4 1756.54   74.75
  -2   5  -4 1681.14   73.85
  -2   5  -4 1740.31   76.51
   2  -5   4 1708.41   74.15
  -2  -5  -4 1513.70   65.19
  -2   5   4 1723.42   74.19
  -2  -5  -4 1816.34   77.77
   2   5  -4 1816.68   77.39
  -2   5   4 1905.65   77.30
   2   5  -4 2165.68   91.91
   2   5   5 9999.00   69.57
  -2   5  -6 1580.64   71.69
  -2   5  -6 1628.72   72.45
  -2  -5   6 1588.53   71.32
   2  -5  -6 1361.36   63.42
   2  -5  -6 1657.66   68.78
   2   5   6 1577.07   69.87
   2   5   6 1460.64   64.87
  -2  -5   6 1566.46   69.14
   2  -5   6 1336.72   61.86
  -2  -5  -6 1294.73   59.17
  -2   5   6 1335.71   55.83
  -2  -5  -6 1463.72   65.88
   2   5  -6 1536.20   68.82
  -2   5   6 1671.16   74.51
   2  -5   6 1459.12   65.90
   2   5  -6 1689.89   74.77
   2  -5  -7 4501.98  187.41
  -2  -5   7 5197.62  214.53
  -2  -5   7 4946.87  203.63
   2   5   7 4526.20  186.51
   2   5   7 5516.70  226.79
  -2   5  -7 5206.04  215.08
   2   5  -7 5869.25  240.71
  -2  -5  -7 4618.84  191.24
   2  -5   7 4771.41  198.09
   2   5  -7 5299.25  218.93
  -2  -5  -7 5000.67  205.77
  -2  -5   8  226.96   25.04
   2  -5  -8  180.57   11.06
   2   5   8  174.59   13.76
   2  -5  -8  164.21   23.24
  -2   5  -8  198.24   24.00
   2  -5   8  155.59   17.31
  -2  -5  -8  168.02   16.89
  -2  -5  -8  145.64   17.03
   2   5  -8  193.51   38.72
   2  -5  -9   34.39    6.57
  -2  -5   9   55.63   16.74
   2  -5  -9   45.44   16.69
   2   5   9   38.04    7.89
   2  -5  -9   23.13    9.66
  -2   5  -9   24.28   17.13
   2  -5   9   39.41   17.97
  -2  -5  -9   51.78   11.01
  -2  -5  -9   32.46   16.05
   2   5  -9   48.13   13.19
   2  -5 -10  104.62    8.87
  -2   5 -10  156.61   23.65
  -2  -5  10  129.29   15.09
   2  -5 -10  112.90    9.52
   2  -5 -10  132.85   20.26
  -2  -5 -10  118.63   17.71
  -2  -5 -10  116.38   22.10
   2  -5  10  125.68   19.29
   2   5 -10  100.59   13.43
   2  -5 -11 1647.46   70.50
  -2  -5  11 1875.94   84.85
   2  -5 -11 1642.04   70.11
   2  -5 -11 1773.99   82.69
  -2   5 -11 2020.47   92.61
   2  -5  11 1670.39   78.07
  -2  -5 -11 1764.62   79.44
  -2  -5 -11 1799.97   84.21
   2   5 -11 1907.95   87.39
   2  -5 -12    8.76    6.67
  -2  -5  12   23.18   10.60
   2  -5 -12    4.01    5.55
  -2  -5 -12    3.52    7.66
  -2  -5 -12   12.32    6.91
   2   5 -12    8.70    5.34
  -2  -5  13 1123.46   43.25
   2  -5 -13 1074.30   32.17
   2  -5 -13 1059.92   32.67
  -2   5 -13 1177.16   47.70
   2  -5 -13 1123.23   46.26
   2  -5  13 1005.50   52.57
  -2  -5 -13 1043.63   39.42
   2   5 -13 1213.30   46.68
  -2  -5 -13 1192.88   47.00
  -2  -5  14  154.70   22.07
   2  -5 -14  189.12   12.67
   2  -5 -14  141.49   12.59
   2  -5 -14  145.38   27.51
  -2   5 -14  190.70   22.83
   2  -5  14  172.72   20.81
  -2  -5 -14  168.79   22.19
  -2  -5 -14  137.29   65.28
   2   5 -14  207.39   27.93
   2  -5 -15  959.46   47.02
  -2  -5  15 1200.78   55.03
   2  -5 -15 1245.47   49.88
  -2   5 -15 1264.61   73.81
   2  -5 -15 1156.13   57.56
   2  -5  15 1120.48   54.22
  -2  -5 -15 1251.65   59.22
  -2  -5 -15 1038.89   47.44
   2   5 -15 1201.79   58.98
  -2  -5  16  198.48   21.57
   2  -5 -16  155.61   20.01
   2  -5 -16  186.00   24.73
  -2   5 -16  188.87   27.44
   2  -5  16  184.93   26.25
  -2  -5 -16  209.74   43.11
  -2  -5 -16  183.38   23.80
   2   5 -16  204.34   26.69
  -2  -5  17  562.84   40.94
   2  -5 -17  597.14   31.32
  -2   5 -17  698.38   51.91
   2  -5  17  585.94   43.43
  -2  -5 -17  709.48   38.25
  -2  -5 -17  735.72   42.84
   2   5 -17  715.25   47.83
   2  -5 -18   60.98   28.90
  -2  -5  18  153.73   26.32
   2  -5 -18   96.84   28.11
  -2   5 -18  126.33   22.28
  -2  -5 -18  113.36   53.50
   2  -5  18  113.37   17.71
  -2  -5 -18  101.58   32.92
   2   5 -18  173.91   31.12
  -2   5 -19  182.53   29.94
  -2  -5  19  174.84   29.59
   2  -5 -19  145.72   14.47
   2  -5 -19  169.69   28.68
  -2  -5 -19  138.89   23.55
  -2  -5 -19  144.28   27.56
   2  -5  19  116.24   19.15
   2   5 -19  219.94   30.55
  -2  -5  20  117.02   20.44
   2  -5 -20   66.03   14.76
  -2   5 -20   47.08   20.87
   2  -5 -20   53.58   26.50
   2  -5  20   56.27   17.39
  -2  -5 -20   61.02   29.04
   2   5 -20   75.02   29.92
  -2  -5 -20   76.80   22.54
  -2  -5  21  321.39   28.42
   2  -5 -21  316.61   32.92
   2  -5 -21  337.31   25.84
  -2   5 -21  360.53   35.27
  -2  -5 -21  339.40   28.80
   2  -5  21  230.88   34.40
  -2  -5 -21  341.78   33.39
   2   5 -21  384.46   38.59
  -2  -5  22  205.30   28.77
  -2   5 -22  262.37   39.97
   2  -5 -22  181.44   18.53
   2  -5 -22  213.67   40.05
  -2  -5 -22  198.69   37.66
  -2  -5 -22  159.22   30.12
   2   5 -22  166.99   40.12
   2  -5  22  169.60   24.85
  -2  -5  23 1184.31   73.76
   2  -5 -23 1278.71   89.59
  -2   5 -23 1152.09   82.44
  -2  -5 -23 1212.54   75.17
   2  -5  23 1134.01   76.72
   2   5 -23 1489.10   97.52
  -2  -5 -23 1090.56   75.75
  -2  -5  24   17.22   11.04
   2  -5 -24   23.59   19.61
  -2   5 -24   18.55   24.32
  -2  -5 -24    9.26   17.67
   2  -5  24   21.77    9.08
  -2  -5 -24   20.35   18.16
   2   5 -24   12.50    9.21
   2  -5 -25   41.85   28.59
  -2  -5  25   36.12   13.16
  -2   5 -25   37.52   34.13
   2  -5  25   77.59   15.47
  -2  -5 -25   58.80   21.08
  -2  -5 -25   30.57   20.46
   2   5 -25   42.87   30.87
  -2  -5  26   54.36   16.41
   2  -5 -26  135.52   36.49
  -2   5 -26  108.13   31.44
  -2  -5 -26   32.36   12.98
   2  -5  26   87.86   20.65
  -2  -5 -26   71.57   22.95
   2   5 -26   44.39   25.85
   2  -5 -27   43.18   20.92
  -2  -5  27   80.02   17.50
  -2   5 -27   50.45   38.07
   2  -5  27   76.90   18.01
   2   5 -27   79.90   25.87
  -2  -5 -27   28.08   19.88
   2  -6   0  580.04   31.61
  -2   6   0  622.83   30.83
   2   6   0  574.53   29.77
  -2  -6   0  660.03   35.41
  -2  -6   0  474.47   25.10
   2  -6   0  474.55   30.63
   2   6   0  470.53   25.36
  -2   6   0  451.67   26.11
   2   6   1  345.92   20.15
   2  -6  -1  432.66   23.71
  -2   6  -1  408.83   22.28
  -2  -6   1  278.91   17.94
  -2  -6   1  460.49   33.73
  -2   6  -1  322.60   29.56
   2   6   1  409.89   23.89
   2  -6  -1  321.15   35.86
   2  -6   1  372.88   22.94
  -2  -6  -1  435.80   26.66
   2   6  -1  472.66   27.67
  -2   6   1  305.37   28.13
  -2  -6  -1  325.49   20.96
   2   6  -1  350.20   20.52
   2  -6   1  307.12   22.18
  -2   6   1  470.59   24.47
   2   6   2    6.68    7.33
  -2   6  -2    3.14    3.93
   2  -6  -2    9.52    6.07
   2  -6  -2   11.60    8.90
  -2   6  -2   20.94   13.48
   2   6   2    1.92    6.16
  -2   6   2    6.17    6.53
  -2  -6  -2    9.72    6.49
   2  -6   2   11.54    6.00
   2  -6   2   11.06    8.07
   2   6  -2    1.47    3.08
  -2  -6  -2    3.10    5.27
  -2   6   2    1.94    5.98
   2   6  -2   21.46   10.29
  -2   6  -3  242.63   17.69
   2   6   3  197.36   14.87
   2  -6  -3  207.25   12.16
  -2  -6   3  227.02   34.62
   2   6   3  184.94   16.06
   2  -6  -3  185.31   21.46
  -2   6  -3  171.79   22.86
  -2   6  -3  189.72   20.13
   2   6  -3  258.06   20.52
   2   6  -3  154.34   11.72
  -2  -6  -3  201.26   19.35
  -2  -6  -3  287.64   22.05
  -2   6   3  205.78   16.56
   2  -6   3  215.79   18.80
   2   6  -3  196.08   21.79
  -2   6   3  176.07   15.99
   2   6   4    8.02    5.85
  -2   6  -4    6.14    6.49
   2   6   4   13.06   10.64
   2  -6  -4   14.09    9.39
  -2   6  -4    9.61    6.99
   2  -6  -4   22.92   10.75
  -2   6  -4    9.49    8.09
   2   6  -4   16.36    9.64
   2   6  -4    8.99    6.48
   2  -6   4   14.48    8.83
  -2  -6  -4   17.68    9.76
  -2   6   4   15.64    5.40
  -2  -6  -4    6.12    6.28
  -2   6   4   15.12   10.34
   2   6  -4    5.52    7.33
   2   6   5  506.80   31.95
  -2   6  -5  560.13   34.71
  -2  -6   5  459.44   60.63
  -2  -6   5  474.48   29.56
   2  -6  -5  564.46   29.93
   2   6   5  486.34   30.69
  -2   6  -5  385.63   27.22
  -2   6  -5  404.16   33.90
   2  -6  -5  371.44   27.92
  -2   6   5  514.55   27.55
  -2   6   5  492.41   31.24
  -2  -6  -5  380.81   26.13
   2  -6   5  395.51   28.60
  -2  -6  -5  524.41   32.25
   2   6  -5  408.96   27.92
   2   6  -5  552.28   33.71
   2   6   6 4327.70  179.37
  -2  -6   6 4091.14  170.94
  -2  -6   6 4150.67  172.23
   2   6   6 3439.83  162.30
   2  -6  -6 3421.48  144.46
  -2   6  -6 4044.76  169.52
  -2  -6  -6 3480.86  145.79
   2   6  -6 4099.13  171.18
  -2  -6  -6 4069.69  168.99
   2  -6   6 3789.48  159.43
   2  -6  -7  340.99   27.19
  -2  -6   7  464.30   30.97
   2  -6  -7  455.01   25.34
  -2  -6   7  432.02   30.56
   2   6   7  424.69   27.95
  -2   6  -7  417.49   31.81
  -2   6   7  343.80   19.70
   2  -6   7  381.90   27.81
   2   6  -7  464.82   38.31
  -2  -6  -7  449.79   32.15
  -2  -6  -7  411.93   28.53
   2  -6  -8  243.81   29.32
  -2  -6   8  269.80   29.65
   2  -6  -8  291.37   15.99
  -2   6  -8  325.24   27.92
   2   6   8  264.63   21.32
  -2   6   8  249.70   13.60
   2  -6   8  286.36   34.49
  -2  -6  -8  249.12   20.58
   2   6  -8  255.59   24.38
  -2  -6  -8  307.85   21.68
   2  -6  -9   12.15    9.83
  -2  -6   9   18.00   13.62
   2  -6  -9    9.43    8.96
  -2   6  -9    2.54    7.30
  -2  -6  -9    5.93    8.29
  -2  -6  -9   24.04   16.02
   2  -6   9   30.46   12.69
  -2   6   9    9.00    6.85
   2   6  -9   19.91   11.34
   2  -6 -10  982.16   51.33
   2  -6 -10 1159.55   59.61
  -2  -6  10 1315.53   35.69
   2  -6 -10 1014.45   60.07
   2  -6  10 1093.90   62.68
  -2  -6 -10 1098.37   42.29
  -2  -6 -10 1196.87   66.13
   2   6 -10 1373.83   65.88
   2  -6 -11   88.86    8.85
  -2   6 -11  133.47   60.27
  -2  -6  11  129.75   29.97
   2  -6 -11   92.73   13.54
   2  -6 -11   72.04   13.52
  -2  -6 -11  101.11   25.37
  -2  -6 -11   83.74   30.15
   2  -6  11  106.80   18.09
   2   6 -11  102.29   24.39
   2  -6 -12  685.58   33.09
   2  -6 -12  701.41   44.17
  -2  -6  12  775.20   45.86
  -2   6 -12  786.05   48.20
   2  -6  12  655.25   40.42
  -2  -6 -12  672.05   40.19
  -2  -6 -12  593.67   41.50
   2   6 -12  763.82   45.16
   2  -6 -13    2.15    3.61
  -2  -6  13   12.48    5.46
  -2   6 -13   11.73    8.77
   2  -6 -13    6.76    4.84
   2  -6 -13  241.02  164.97
  -2  -6 -13    2.82    6.48
  -2  -6 -13   11.42   11.40
   2   6 -13   20.20   14.43
   2  -6  13    4.87   11.63
   2  -6 -14    7.94    6.00
  -2  -6  14   13.47    5.61
  -2   6 -14   15.25   14.00
   2  -6 -14    6.99    6.88
   2  -6 -14    7.06    7.11
  -2  -6 -14   19.62    8.88
  -2  -6 -14   19.59    6.04
   2   6 -14   19.69   16.74
   2  -6  14   10.63   12.01
   2  -6 -15    7.57    5.36
   2  -6 -15    4.56    6.59
  -2  -6  15   22.84   13.10
   2  -6 -15   27.67   20.90
  -2   6 -15   15.64   15.60
   2  -6  15   13.39    7.06
  -2  -6 -15   12.94   13.81
  -2  -6 -15   19.81    6.96
   2   6 -15   15.90   11.67
   2  -6 -16   84.71   10.36
  -2  -6  16  105.29   18.47
   2  -6 -16   83.21   14.19
   2  -6 -16   90.58   18.30
  -2   6 -16   89.11   18.51
   2  -6  16  115.04   20.34
  -2  -6 -16  107.13   27.03
  -2  -6 -16   90.06   27.15
   2   6 -16   91.00   20.73
  -2   6 -17  452.51   41.89
  -2  -6  17  316.16   37.58
   2  -6 -17  311.27   24.09
   2  -6 -17  315.58   40.02
  -2  -6 -17  353.58   49.31
  -2  -6 -17  318.56   30.09
   2  -6  17  264.29   29.79
   2   6 -17  375.92   42.04
  -2  -6  18  359.96   37.05
   2  -6 -18  335.52   32.90
  -2   6 -18  389.78   39.91
   2  -6 -18  340.22   44.06
   2  -6  18  353.67   38.01
  -2  -6 -18  323.12   39.49
   2   6 -18  474.38   42.99
  -2  -6 -18  364.69   41.04
  -2   6 -19  123.35   26.27
  -2  -6  19  157.38   26.40
   2  -6 -19  106.21   14.70
   2  -6 -19  129.51   27.16
  -2  -6 -19  111.12   52.78
  -2  -6 -19   99.76   22.83
   2  -6  19  126.16   17.83
   2   6 -19  125.49   25.61
  -2  -6  20   48.83   19.30
   2  -6 -20   29.27   17.50
  -2   6 -20   70.95   20.55
   2  -6 -20   35.97   27.47
   2  -6  20   71.25   23.94
  -2  -6 -20   47.14   11.42
   2   6 -20   32.81   34.96
  -2  -6 -20   42.90   34.45
  -2  -6  21    7.04   12.25
   2  -6 -21    9.35    6.94
   2  -6 -21   34.30   22.89
  -2   6 -21   32.13   26.41
   2  -6  21   68.43   23.01
  -2  -6 -21   24.56   10.71
   2   6 -21   48.30   30.77
  -2  -6  22  886.02   54.40
   2  -6 -22 1047.40   69.60
  -2   6 -22  899.27   66.32
   2  -6  22  837.56   57.92
  -2  -6 -22  962.76   62.85
   2   6 -22 1020.95   71.94
  -2  -6  23   60.94   14.60
  -2   6 -23   53.61   48.81
   2  -6 -23   91.39   31.75
   2  -6  23   92.18   21.21
  -2  -6 -23   44.80   41.05
  -2  -6 -23   53.50   18.68
   2   6 -23   61.77   34.64
  -2   6 -24  234.74   51.76
  -2  -6  24  253.63   24.59
   2  -6 -24  262.58   34.16
  -2  -6 -24  250.03   27.28
  -2  -6 -24  295.93   36.75
   2   6 -24  226.28   57.47
   2  -6  24  261.66   31.61
  -2  -6  25   13.96    9.73
  -2   6 -25   16.85   20.94
   2  -6 -25   15.31   17.60
  -2  -6 -25    5.62   12.25
   2  -6  25   27.48   11.54
   2   6 -25   10.38    7.18
  -2  -6  26   10.27    6.92
  -2   6 -26   16.60   20.94
   2  -6 -26   13.00   16.94
  -2  -6 -26   37.19   24.90
  -2  -6 -26    9.08   20.88
   2   6 -26    6.15   14.04
  -2  -6  27   37.74   14.61
   2  -6 -27   12.70   22.71
   2  -6  27   13.62   10.45
  -2  -6 -27   30.09   14.07
   2   6 -27   15.63   14.66
   2  -7   0    9.92    5.53
  -2   7   0   20.20    8.03
  -2  -7   0   15.18   14.27
   2   7   0   16.03    8.62
  -2  -7   0   11.71   12.35
   2  -7   0    8.38   10.29
  -2   7   0    6.00    7.13
   2   7   0   10.00    7.48
   2  -7  -1   75.73   16.60
  -2   7  -1   78.75   28.31
  -2  -7   1   52.47   19.29
  -2  -7   1   33.71   21.30
   2   7   1   34.24   20.10
   2   7   1   70.22   14.70
  -2   7  -1   42.48   18.04
   2  -7  -1   48.25   12.42
   2  -7   1   96.38   16.24
  -2   7   1   67.41   12.67
   2   7  -1   80.74   16.70
   2  -7   1   48.98   13.61
  -2  -7  -1   72.18   12.48
   2   7  -1   84.69   11.85
  -2  -7  -1   61.57   11.86
  -2   7   1   53.75   10.40
   2   7   2   79.09   10.98
   2  -7  -2  105.83   14.12
  -2  -7   2  113.25   15.15
  -2   7  -2  121.84   22.04
  -2  -7   2   63.96   10.60
   2   7   2   80.71   11.29
  -2   7  -2   73.36   10.89
   2  -7  -2   51.55   10.13
   2  -7   2   83.35   13.62
  -2  -7  -2   83.02   11.56
   2  -7   2   59.19   15.02
   2   7  -2   68.75   10.50
  -2   7   2   71.46    9.81
  -2  -7  -2   32.26   14.26
   2   7  -2   96.77   16.15
  -2   7   2   89.59    9.64
  -2   7  -3   87.56   13.92
   2   7   3   53.54   12.71
   2  -7  -3   58.38   12.51
  -2  -7   3   60.78   16.19
   2  -7  -3   25.93   17.39
   2   7   3   64.71   10.49
  -2   7  -3   58.89   13.53
   2  -7   3   63.16   11.42
   2   7  -3   60.31   10.63
  -2  -7  -3   56.68   12.36
  -2   7   3   66.35   10.82
   2   7  -3   70.73   10.84
  -2  -7  -3   37.33   19.33
   2   7   4  397.10   26.24
  -2  -7   4  451.29   31.35
   2  -7  -4  445.99   26.11
   2   7   4  408.94   26.68
   2  -7  -4  332.27   27.69
  -2   7  -4  303.18   25.67
   2  -7   4  339.78   24.19
  -2  -7  -4  420.06   35.84
   2   7  -4  290.69   21.65
  -2  -7  -4  341.89   30.70
  -2   7   4  365.07   30.24
   2   7  -4  333.45   29.46
   2  -7  -5 3977.25  167.54
  -2  -7   5 5015.38  207.73
   2   7   5 5101.41  210.09
   2   7   5 4704.76  194.40
  -2   7  -5 4349.78  183.05
  -2  -7  -5 4982.70  205.86
   2   7  -5 4477.04  185.29
  -2   7   5 4970.32  201.92
  -2  -7  -5 4022.28  167.59
   2  -7   5 4550.40  189.52
  -2  -7   6 5075.70  210.70
   2  -7  -6 3985.41  167.64
  -2   7  -6 4807.44  200.27
   2  -7   6 4434.02  185.42
  -2   7   6 5134.29  208.54
  -2  -7  -6 4937.28  204.57
   2   7  -6 5047.25  209.15
  -2  -7  -6 4104.16  172.42
   2  -7  -7  535.36   35.74
  -2  -7   7  663.26   41.95
   2  -7  -7  698.02   37.79
  -2   7  -7  681.94   45.06
  -2  -7  -7  685.44   41.99
  -2   7   7  515.37   29.22
   2  -7   7  576.47   37.70
   2   7  -7  573.76   36.20
  -2  -7  -7  574.76   36.26
   2  -7  -8  329.06   25.32
  -2  -7   8  486.30   35.47
   2  -7  -8  478.60   27.59
  -2   7  -8  362.26   27.88
  -2  -7  -8  417.08   29.13
  -2   7   8  395.64   23.10
   2  -7   8  396.25   43.11
   2   7  -8  400.76   37.81
  -2  -7  -8  371.11   27.45
   2  -7  -9   57.88   14.09
  -2  -7   9  146.75   24.79
   2  -7  -9   77.04    7.68
  -2   7  -9   91.38   47.76
  -2  -7  -9   89.35   15.20
  -2   7   9   62.24    8.48
   2  -7   9   91.16   16.28
   2   7  -9   63.85   15.27
  -2  -7  -9   70.99   17.41
  -2  -7  10 1894.26   89.09
   2  -7 -10 2102.28   90.96
   2  -7 -10 1797.35   87.14
  -2   7 -10 2123.49  100.38
   2  -7  10 1828.55   87.83
  -2  -7 -10 2086.34   95.46
  -2   7  10 1667.56   72.59
  -2  -7 -10 1710.36   81.56
   2   7 -10 2132.24   99.27
   2  -7 -11  430.35   15.27
  -2  -7  11  428.45   30.50
  -2   7 -11  463.30   37.23
   2  -7 -11  502.43   35.47
   2  -7  11  506.41   36.33
  -2  -7 -11  428.43   31.61
  -2  -7 -11  492.88   27.32
   2   7 -11  529.45   40.90
   2  -7 -12  677.99   29.03
  -2  -7  12  916.16   45.94
   2  -7 -12  871.18   36.28
  -2   7 -12  877.46   48.20
   2  -7 -12  798.22   44.08
   2  -7  12  765.58   45.17
  -2  -7 -12  839.54   40.59
   2   7 -12  786.61   42.64
  -2  -7 -12  814.53   42.55
   2  -7 -13   35.21    5.78
  -2  -7  13   57.61   12.77
   2  -7 -13   43.07   10.50
  -2   7 -13   25.35   19.22
   2  -7 -13   26.02   17.75
   2  -7  13   53.49   23.10
  -2  -7 -13   36.36    9.46
   2   7 -13   33.46   18.42
  -2  -7 -13   30.29   16.86
   2  -7 -14  309.94   22.69
  -2  -7  14  359.89   32.89
   2  -7 -14  315.66   31.88
   2  -7 -14  279.89   21.47
  -2   7 -14  327.15   38.13
   2  -7  14  380.55   33.86
  -2  -7 -14  284.17   27.60
  -2  -7 -14  370.36   30.76
   2   7 -14  327.68   34.82
   2  -7 -15   17.41   11.56
   2  -7 -15    8.35    6.00
  -2  -7  15   16.99    6.77
  -2   7 -15   20.24   17.85
   2  -7 -15    5.76   17.16
   2  -7  15   23.95    8.21
  -2  -7 -15   15.81    7.91
  -2  -7 -15   10.17    6.90
   2   7 -15   17.82   14.93
   2  -7 -16  535.35   33.31
   2  -7 -16  529.49   30.88
  -2  -7  16  616.42   45.20
   2  -7 -16  464.74   39.86
  -2   7 -16  490.24   39.48
   2  -7  16  497.00   38.60
  -2  -7 -16  437.92   39.04
  -2  -7 -16  542.53   42.44
   2   7 -16  491.68   40.11
   2  -7 -17  288.98   23.49
  -2  -7  17  253.35   23.31
   2  -7 -17  192.74   38.26
  -2   7 -17  220.68   34.41
  -2  -7 -17  223.09   26.72
   2  -7  17  209.20   26.30
  -2  -7 -17  233.18   40.46
   2   7 -17  304.60   35.05
  -2   7 -18  127.64   23.82
  -2  -7  18  117.50   22.48
   2  -7 -18  139.52   15.22
   2  -7 -18   60.18   37.08
  -2  -7 -18  109.69   23.39
  -2  -7 -18  105.43   17.01
   2  -7  18   99.49   22.36
   2   7 -18  134.13   25.89
   2  -7 -19    7.79   10.20
  -2  -7  19   13.80   11.08
   2  -7 -19   23.65   17.71
  -2   7 -19   21.64   14.93
  -2  -7 -19   28.78   21.54
   2  -7  19   37.99    8.02
  -2  -7 -19   19.84   15.33
   2   7 -19   32.98   24.21
  -2   7 -20    8.32    8.68
  -2  -7  20   18.09   12.10
   2  -7 -20    8.78   12.42
   2  -7 -20   15.05   11.44
  -2  -7 -20    5.78    5.81
  -2  -7 -20   11.80   12.52
   2  -7  20   34.13   14.33
   2   7 -20   11.17   17.15
   2  -7 -21  296.47   49.00
  -2  -7  21  319.78   33.81
  -2   7 -21  393.59   45.63
   2  -7  21  280.44   39.20
  -2  -7 -21  288.20   35.65
  -2  -7 -21  341.16   34.71
   2   7 -21  310.59   63.03
  -2   7 -22  268.03   44.33
  -2  -7  22  241.36   25.00
   2  -7 -22  268.33   41.41
  -2  -7 -22  189.20   47.50
  -2  -7 -22  228.21   37.13
   2   7 -22  291.41   39.06
   2  -7  22  228.97   30.87
   2  -7 -23  376.77   39.81
  -2  -7  23  408.48   45.09
  -2   7 -23  509.40   50.13
   2  -7  23  329.07   37.71
  -2  -7 -23  472.02   48.98
  -2  -7 -23  337.33   41.07
   2   7 -23  380.03   47.87
  -2   7 -24  177.77   32.99
  -2  -7  24  145.33   22.69
   2  -7 -24  187.90   44.92
  -2  -7 -24  218.49   34.96
  -2  -7 -24  209.14   35.25
   2   7 -24  135.28  101.72
   2  -7  24  127.71   23.99
  -2   7 -25   29.20   29.41
  -2  -7  25   31.64   11.35
   2  -7 -25   15.02   23.45
  -2  -7 -25   16.22   17.57
  -2  -7 -25   34.91   17.55
   2   7 -25    3.15   20.76
   2  -7  25   15.43   11.51
  -2  -7  26   35.74   17.72
   2  -7 -26   24.29   22.52
  -2   7 -26   10.81   15.72
   2  -7  26   28.21   15.42
  -2  -7 -26   32.41   18.82
   2   7 -26   37.96   32.25
  -2  -7  27   24.67   14.50
   2  -7 -27   28.86   18.44
  -2   7 -27   13.94   27.06
   2  -7  27   48.69   18.00
  -2  -7 -27   47.90   16.17
   2   7 -27   28.62   16.72
   2  -8   0  279.22   20.87
  -2   8   0  365.96   23.50
  -2  -8   0  314.56   25.64
   2  -8   0  251.59   23.21
  -2  -8   0  223.37   20.03
   2   8   0  188.47   14.76
   2  -8  -1 2529.15  106.70
  -2  -8   1 2015.44   88.92
  -2  -8   1 2758.23  118.30
   2  -8  -1 2038.47   90.37
  -2   8  -1 2809.54  118.54
   2   8   1 2198.14   95.09
  -2   8   1 2877.73  120.68
   2  -8   1 2487.44  114.92
   2  -8   1 2025.52   91.01
  -2  -8  -1 2102.62   91.24
   2   8  -1 2036.65   88.02
  -2  -8  -1 2672.70  114.47
   2  -8  -2  655.82   36.74
   2  -8  -2  575.81   37.31
  -2  -8   2  674.83   40.32
  -2   8  -2  745.37   40.95
   2   8   2  603.34   35.36
  -2  -8   2  533.41   35.74
   2  -8   2  600.79   37.20
   2  -8   2  551.28   35.83
   2   8  -2  597.69   35.07
  -2  -8  -2  590.44   38.49
  -2   8   2  819.97   43.54
  -2  -8  -2  696.11   41.49
   2  -8  -3  279.87   24.75
   2  -8  -3  335.13   21.58
  -2  -8   3  326.80   35.37
   2   8   3  295.06   24.50
  -2   8   3  258.24   22.63
  -2  -8  -3  305.83   24.56
   2  -8   3  327.90   26.46
  -2  -8  -3  221.58   25.26
   2   8  -3  265.73   21.37
   2   8  -3  301.64   26.54
   2  -8  -4   65.75   36.65
   2  -8  -4   90.73   12.42
  -2  -8   4  108.93   23.36
  -2   8  -4   64.46   29.44
  -2   8   4   79.62   10.43
  -2  -8  -4   86.34   18.10
   2  -8   4   71.85   14.64
   2   8  -4   52.19   29.93
  -2  -8  -4   47.80   12.45
   2  -8  -5 1233.29   59.18
   2  -8  -5 1576.79   68.09
  -2  -8   5 1626.58  284.23
  -2   8  -5 1322.17   64.76
  -2  -8  -5 1577.00   72.08
  -2  -8  -5 1233.39   58.17
   2  -8   5 1351.49   64.04
  -2   8   5 1593.79   68.63
   2   8  -5 1396.33   65.67
  -2  -8   6   36.99   13.60
   2  -8  -6   39.69    7.04
   2  -8  -6   29.79   13.94
  -2   8  -6   29.37   15.69
   2  -8   6   15.61   12.74
  -2  -8  -6   24.49    9.56
  -2   8   6   27.81    6.69
  -2  -8  -6   18.06   12.94
   2   8  -6   31.58   22.06
   2  -8  -7  159.21   17.80
  -2  -8   7  185.26   21.66
   2  -8  -7  163.17   17.86
  -2   8  -7  129.44   20.75
  -2  -8  -7  162.75   19.27
  -2   8   7  163.27   14.01
   2  -8   7  163.44   23.49
   2   8  -7  146.42   22.04
  -2  -8  -7  129.75   20.88
   2  -8  -8  502.26   37.04
  -2  -8   8  565.72   39.11
   2  -8  -8  575.40   33.27
  -2   8  -8  467.93   37.46
  -2  -8  -8  592.93   37.96
  -2   8   8  570.26   32.28
   2  -8   8  528.16   37.85
   2   8  -8  592.10   40.65
  -2  -8  -8  436.03   30.37
  -2  -8   9  401.04   29.73
   2  -8  -9  438.17   25.01
  -2   8  -9  342.76   29.41
   2  -8   9  381.86   31.57
  -2  -8  -9  410.07   30.29
  -2  -8  -9  298.20   25.14
   2   8  -9  336.37   32.73
  -2   8   9  331.12   18.72
  -2   8 -10    8.35   17.73
   2  -8 -10    5.91    4.72
   2  -8 -10   23.11   18.59
  -2   8  10    7.84    5.41
  -2  -8 -10   23.18   14.25
  -2  -8 -10   14.17   14.20
   2  -8  10   21.79   16.43
   2   8 -10   21.39   24.03
   2  -8 -11  570.85   37.43
  -2  -8  11  568.05   36.41
   2  -8 -11  747.40   32.01
  -2   8 -11  735.97   44.13
  -2  -8 -11  711.93   39.59
  -2  -8 -11  549.90   33.28
   2  -8  11  565.59   36.11
  -2   8  11  549.68   24.73
   2   8 -11  707.95   52.43
   2  -8 -12   12.80    4.59
  -2   8 -12   16.09   11.01
  -2  -8  12   31.58   15.03
   2  -8 -12    8.52    8.81
   2  -8 -12   14.74   12.05
  -2  -8 -12   15.47    8.54
  -2  -8 -12    6.00    9.32
   2  -8  12   18.38   10.17
   2   8 -12    9.00    8.56
   2  -8 -13  236.12   14.93
  -2  -8  13  200.92   30.43
  -2   8 -13  207.04   23.97
   2  -8 -13  246.44   16.62
   2  -8 -13  191.22   26.49
  -2  -8 -13  229.30   20.60
  -2  -8 -13  162.81   22.25
   2   8 -13  212.33   47.47
   2  -8  13  247.48   26.11
   2  -8 -14   75.10    7.99
  -2   8 -14  159.56   55.43
  -2  -8  14  116.72   21.95
   2  -8 -14   84.21   13.38
   2  -8 -14   50.86   36.10
  -2  -8 -14   84.07   37.28
  -2  -8 -14   85.32   32.76
   2  -8  14   98.90   22.98
   2   8 -14  111.18   22.87
   2  -8 -15    8.72    6.01
  -2  -8  15   16.52   10.61
   2  -8 -15   10.69    6.80
   2  -8 -15   15.34   13.37
  -2   8 -15    7.86   13.02
   2  -8  15   18.47    9.19
  -2  -8 -15   11.75    7.14
  -2  -8 -15   33.01   13.14
   2   8 -15   17.60   10.30
  -2  -8  16   18.10    9.98
   2  -8 -16   32.51   10.65
   2  -8 -16   34.89   24.54
  -2   8 -16   24.29   15.48
  -2  -8 -16   46.67   16.34
  -2  -8 -16   48.40   31.81
   2   8 -16   15.72   12.83
  -2  -8  17  697.03   41.38
  -2   8 -17  787.17   53.23
   2  -8 -17  838.46   38.13
   2  -8 -17  569.91   43.40
  -2  -8 -17  701.29   44.63
  -2  -8 -17  664.74   41.76
   2   8 -17  802.67   52.70
   2  -8  17  686.71   46.00
  -2  -8  18   92.72   16.63
  -2   8 -18   94.70   22.83
   2  -8 -18   75.69   23.29
   2  -8 -18  105.62   13.40
  -2  -8 -18   47.53   22.65
  -2  -8 -18   62.68   35.21
   2   8 -18   84.18   28.27
   2  -8  18   76.14   18.20
  -2  -8  19  133.25   22.88
   2  -8 -19  169.15   17.36
   2  -8 -19  138.39   22.09
  -2   8 -19  178.61   29.48
   2  -8  19  150.73   23.86
  -2  -8 -19  144.50   19.53
  -2  -8 -19  165.83   41.29
   2   8 -19  193.51   33.22
  -2   8 -20   23.74   20.75
  -2  -8  20   17.20    8.44
   2  -8 -20   18.85   22.23
   2  -8 -20   21.71   13.50
  -2  -8 -20   19.15   16.86
  -2  -8 -20   22.17   16.96
   2  -8  20   51.33   12.77
   2  -8 -21  318.35   38.59
  -2  -8  21  252.84   32.63
  -2   8 -21  394.38   43.34
   2  -8  21  381.63   35.06
  -2  -8 -21  293.01   35.62
  -2  -8 -21  303.30   32.87
   2   8 -21  382.59   42.64
  -2   8 -22   63.26   22.56
  -2  -8  22   77.47   20.58
   2  -8 -22   34.37   28.26
  -2  -8 -22   42.57   27.96
  -2  -8 -22   66.71   23.72
   2   8 -22   55.22   49.34
   2  -8  22   88.74   25.44
   2  -8 -23  418.98   48.19
  -2  -8  23  285.47   40.87
  -2   8 -23  382.62   37.59
   2  -8  23  260.34   35.59
  -2  -8 -23  297.64   51.70
  -2  -8 -23  334.38   38.55
   2   8 -23  407.46   57.30
  -2  -8  24   68.61   32.43
   2  -8 -24   68.70   52.20
  -2   8 -24  153.36   37.97
   2  -8  24  125.66   30.03
  -2  -8 -24  122.31   23.33
  -2  -8 -24    9.63   26.46
   2   8 -24  100.07   27.17
  -2  -8  25   55.07   18.15
  -2   8 -25   32.95   40.27
   2  -8 -25   28.54   27.28
  -2  -8 -25   31.16   17.71
   2  -8  25   23.73   16.82
   2   8 -25    5.42   16.26
  -2  -8  26   58.70   16.28
  -2   8 -26   26.57   22.28
   2  -8 -26   72.33   22.68
  -2  -8 -26   23.28   19.65
   2  -8  26   40.94   18.91
   2   8 -26   56.97   27.99
   2  -9   0 3040.79  128.53
  -2  -9   0 3436.22  146.65
  -2   9   0 3703.03  154.48
  -2  -9   0 2691.43  114.96
   2  -9   0 2612.29  113.49
   2  -9  -1 1269.64   79.94
  -2  -9   1  908.06   50.27
  -2  -9   1 1311.30   69.80
   2  -9  -1  906.75   52.27
  -2  -9  -1 1292.23   68.10
  -2   9   1 1380.73   28.47
   2  -9   1  935.09   54.29
   2  -9   1 1172.46   65.93
  -2  -9  -1 1019.68   27.81
   2  -9  -2  392.60   23.53
  -2  -9   2  381.74   25.76
   2  -9  -2  299.28   21.11
  -2  -9   2  295.48   19.30
   2  -9   2  437.78   35.78
  -2   9   2  468.03   28.94
   2  -9   2  304.23   29.50
  -2  -9  -2  419.18   25.08
  -2  -9  -2  344.81   25.40
   2  -9  -3 1223.04   65.33
  -2  -9   3 1272.05   70.65
   2  -9  -3 1010.62   31.99
   2  -9   3 1118.85   62.33
  -2   9   3 1411.78   63.57
   2  -9   3 1064.75   61.18
  -2  -9  -3  952.56   53.43
  -2  -9  -3 1291.90   70.78
   2   9  -3 1011.39   57.57
   2  -9  -4 1043.07   55.54
  -2  -9   4  995.51   57.35
   2  -9  -4  822.19   50.65
  -2   9  -4  765.72   47.12
   2  -9   4  929.89   53.69
  -2   9   4 1104.89   58.52
  -2  -9  -4 1054.51   59.77
  -2  -9  -4  749.52   44.33
   2   9  -4  896.73   52.44
   2  -9  -5  420.08   30.72
  -2  -9   5  536.63   35.79
   2  -9  -5  595.24   34.66
  -2   9  -5  440.41   34.48
  -2  -9  -5  637.13   39.99
  -2  -9  -5  444.78   32.08
   2  -9   5  530.58   36.32
  -2   9   5  562.48   32.73
   2   9  -5  532.98   36.61
  -2  -9   6 1382.44   67.06
   2  -9  -6 1460.02   65.53
   2  -9  -6 1009.22   60.92
  -2   9  -6 1084.97   62.10
   2  -9   6 1162.68   66.48
  -2  -9  -6 1328.64   72.40
  -2   9   6 1407.41   62.28
  -2  -9  -6 1101.41   54.39
   2   9  -6 1278.04   62.56
  -2  -9   7   38.05   10.88
   2  -9  -7   34.47   18.72
   2  -9  -7   30.42   14.90
  -2   9  -7   36.08   14.61
   2  -9   7   27.96   11.78
  -2  -9  -7   24.76    8.48
  -2   9   7   24.49    6.19
  -2  -9  -7   10.61    9.49
   2   9  -7   38.49   29.46
   2  -9  -8  228.56   24.72
  -2  -9   8  268.86   24.19
   2  -9  -8  332.89   21.19
  -2   9  -8  271.37   23.83
  -2  -9  -8  325.12   26.90
  -2   9   8  247.41   20.25
   2  -9   8  338.95   30.85
   2   9  -8  256.02   26.15
  -2  -9  -8  289.07   25.79
   2  -9  -9    9.99    6.10
  -2  -9   9   23.10   12.92
  -2   9  -9    9.27   15.65
   2  -9  -9   21.03   16.89
   2  -9   9   15.54    6.56
  -2   9   9    2.39    2.83
  -2  -9  -9    6.47    7.85
   2   9  -9   14.19    6.03
  -2  -9  -9   14.01   13.26
  -2  -9  10 1874.49   62.21
   2  -9 -10 2126.39   55.35
   2  -9 -10 1613.40   57.96
  -2   9 -10 1932.23   67.07
   2  -9  10 1829.06   62.46
  -2   9  10 1669.12   44.93
  -2  -9 -10 1621.27   53.43
   2   9 -10 2036.82   64.02
  -2  -9  11  474.84   32.75
   2  -9 -11  641.93   31.10
   2  -9 -11  376.51   30.60
  -2   9 -11  425.34   45.74
   2  -9  11  518.69   36.10
  -2  -9 -11  552.96   31.67
  -2   9  11  415.28   21.78
  -2  -9 -11  429.93   30.61
   2   9 -11  541.73   38.90
  -2  -9  12  995.00   51.38
   2  -9 -12 1156.08   46.32
   2  -9 -12  935.68   50.77
  -2   9 -12 1026.91   54.19
   2  -9  12  971.62   50.96
  -2  -9 -12 1107.88   50.82
  -2   9  12  903.74   37.46
  -2  -9 -12  858.10   45.90
   2   9 -12 1176.79   58.50
   2  -9 -13   10.90    6.09
  -2  -9  13   12.68   10.45
   2  -9 -13   13.55   14.61
   2  -9 -13   31.75   19.85
  -2   9 -13   16.01   14.64
   2  -9  13   12.48   15.63
  -2  -9 -13   18.05    8.77
  -2  -9 -13   13.67    9.03
   2   9 -13    9.17    9.91
   2  -9 -14   12.32    8.79
  -2  -9  14   25.34   14.93
   2  -9 -14   27.60    8.18
  -2   9 -14   12.33   20.78
   2  -9 -14   28.24   17.05
  -2  -9 -14   18.97    5.70
  -2  -9 -14   28.65   16.07
   2   9 -14   11.75   20.17
   2  -9 -15   12.53    6.86
  -2  -9  15   15.26   11.08
  -2   9 -15   39.10   27.38
   2  -9 -15    7.91    7.45
   2  -9 -15   15.80   10.70
  -2  -9 -15   60.22   30.47
  -2  -9 -15   13.37    7.39
   2   9 -15   17.55   17.83
   2  -9  15   24.65    8.90
  -2  -9  16 1191.54   59.44
   2  -9 -16 1347.27   54.77
   2  -9 -16 1175.04   61.61
  -2   9 -16 1292.18   69.23
   2  -9  16 1185.14   60.55
  -2  -9 -16 1219.73   62.86
   2   9 -16 1357.73   68.01
  -2  -9  17  263.76   28.09
   2  -9 -17  237.46   16.74
  -2   9 -17  210.53   32.20
   2  -9 -17  173.03   28.20
   2  -9  17  197.11   23.18
  -2  -9 -17  223.23   34.58
   2   9 -17  217.85   25.18
  -2  -9 -17  225.26   29.43
  -2  -9  18  247.88   30.53
  -2   9 -18  227.64   51.45
   2  -9 -18  223.90   16.83
   2  -9 -18  187.64   26.67
  -2  -9 -18  220.61   22.34
  -2  -9 -18  207.94   33.17
   2   9 -18  238.90   28.98
   2  -9  18  211.75   27.97
  -2  -9  19  246.83   28.60
  -2   9 -19  302.58   31.43
   2  -9 -19  336.08   20.36
   2  -9 -19  274.16   36.17
  -2  -9 -19  293.02   26.93
  -2  -9 -19  225.64   35.67
   2   9 -19  359.52   43.84
   2  -9  19  262.38   31.07
   2  -9 -20   39.74   22.83
  -2  -9  20   58.61   24.50
  -2   9 -20   53.46   43.25
   2  -9  20   38.05   20.16
  -2  -9 -20   61.42   28.92
  -2  -9 -20   61.78   28.53
   2   9 -20   38.22   18.66
  -2  -9  21   67.92   18.37
  -2   9 -21   20.12   17.93
   2  -9 -21   26.97   17.36
   2  -9  21   48.60   15.93
  -2  -9 -21   73.12   25.55
  -2  -9 -21   32.56   15.64
   2   9 -21    8.23   19.79
  -2   9 -22  429.59   47.98
  -2  -9  22  315.34   35.98
   2  -9 -22  262.60   32.85
  -2  -9 -22  413.66   45.72
  -2  -9 -22  302.03   34.13
   2   9 -22  361.31   40.65
   2  -9  22  309.90   32.72
  -2  -9  23   15.59   12.12
   2  -9 -23   16.43   21.69
   2  -9  23   22.98    8.59
  -2  -9 -23   17.39   17.56
  -2  -9 -23   23.77   16.48
   2   9 -23   65.24   34.90
  -2  -9  24  156.34   25.57
  -2   9 -24  140.37   30.63
   2  -9 -24  108.56   37.63
   2  -9  24  177.52   37.37
  -2  -9 -24  182.35   36.00
  -2  -9 -24  155.58   30.12
   2   9 -24   93.04   48.46
  -2  -9  25    9.21    4.83
  -2   9 -25   17.01   10.14
   2  -9 -25   22.27   21.35
   2   9 -25   16.10   15.67
   2  -9  25    6.82    9.47
  -2  -9  26   57.77   22.57
  -2   9 -26   23.20   16.46
   2  -9 -26   25.71   22.85
  -2  -9 -26   49.72   30.61
   2  -9  26   34.94   10.18
   2   9 -26   20.26   19.35
   2 -10   0 1228.42   96.61
  -2 -10   0 1438.40   69.68
  -2 -10   0  986.79   55.38
   2 -10   0 1179.85   60.10
   2 -10  -1    5.81    3.57
  -2 -10   1   12.22    7.04
  -2 -10   1    3.91    4.84
   2 -10   1    4.84    6.68
  -2 -10  -1    6.96    9.22
  -2 -10  -1    4.95    7.65
   2 -10   1    9.54    8.31
   2 -10  -2   73.74   11.77
  -2 -10   2   91.81   20.71
  -2 -10   2   50.34   14.24
   2 -10  -2   50.45   12.38
   2 -10   2   74.05   15.32
  -2  10   2   78.50    9.90
  -2 -10  -2  127.15   18.64
  -2 -10  -2   54.04   13.21
   2 -10   2   60.22   14.73
   2 -10  -3  205.10   23.51
   2 -10  -3  255.20   18.05
  -2 -10   3  274.29   32.67
  -2  10   3  257.37   18.56
  -2 -10  -3  305.68   28.30
   2 -10   3  223.98   22.01
   2 -10   3  228.03   23.49
  -2 -10  -3  186.37   16.85
   2  10  -3  215.55   20.28
   2 -10  -4   53.17   13.41
  -2 -10   4   58.35   15.67
   2 -10  -4   69.86   10.23
  -2  10  -4   63.22   26.82
  -2 -10  -4   64.93   13.50
  -2  10   4   58.55    9.54
   2 -10   4   78.46   15.07
   2  10  -4   31.87   33.60
  -2 -10  -4   53.92   16.94
   2 -10  -5  221.28   14.78
  -2 -10   5  227.16   23.24
   2 -10  -5  134.71   28.60
  -2  10  -5  160.32   19.94
   2 -10   5  159.85   20.46
  -2 -10  -5  191.35   17.62
  -2  10   5  167.71   16.90
  -2 -10  -5  167.82   31.90
   2  10  -5  204.22   27.36
  -2 -10   6   20.46    9.66
  -2  10  -6    2.32    5.45
   2 -10  -6   14.46    6.29
   2 -10  -6   11.98   11.11
  -2 -10  -6    6.00   10.11
  -2  10   6    3.84    3.69
  -2 -10  -6    8.59    7.50
   2 -10   6   12.46   15.48
   2  10  -6    7.70    4.95
  -2 -10   7  322.47   42.45
   2 -10  -7  326.50   21.22
   2 -10  -7  214.94   22.79
  -2  10  -7  245.92   45.77
   2 -10   7  235.62   25.03
  -2 -10  -7  285.76   27.96
  -2  10   7  275.20   20.31
  -2 -10  -7  246.68   23.10
   2  10  -7  270.22   35.59
   2 -10  -8  743.20   46.02
  -2 -10   8  835.90   56.36
   2 -10  -8  892.79   43.49
  -2  10  -8  684.93   46.67
  -2 -10  -8  854.48   47.58
  -2 -10  -8  709.83   40.47
   2 -10   8  806.44   47.13
  -2  10   8  842.75   40.68
   2  10  -8  677.95   50.97
  -2  10  -9   25.75   18.15
  -2 -10   9   33.25   18.83
   2 -10  -9   22.85    9.53
  -2 -10  -9   21.22   14.95
  -2  10   9    9.67    8.07
  -2 -10  -9   29.70   11.16
   2 -10   9   30.07   13.07
   2  10  -9    7.74   15.52
   2 -10 -10  297.92   24.93
  -2 -10  10  396.89   48.25
   2 -10 -10  362.96   20.60
  -2  10 -10  358.87   30.03
  -2 -10 -10  436.92   28.00
  -2  10  10  302.45   16.07
   2 -10  10  332.66   27.17
   2  10 -10  412.22   34.21
  -2 -10 -10  318.43   26.90
   2 -10 -11   17.02   19.44
  -2 -10  11   11.72   12.04
   2 -10 -11   14.45   10.11
  -2  10 -11    8.27   13.38
  -2 -10 -11   15.33   15.67
  -2 -10 -11   22.51   10.67
   2 -10  11   27.28   10.63
  -2  10  11   11.60    7.91
   2  10 -11   43.75   26.08
   2 -10 -12  263.63   30.49
  -2 -10  12  284.44   40.28
   2 -10 -12  297.88   17.90
  -2  10 -12  329.29   37.32
  -2 -10 -12  280.07   27.63
  -2  10  12  254.48   20.44
   2 -10  12  255.87   29.30
   2  10 -12  268.15   43.16
  -2 -10 -12  311.49   32.69
  -2 -10  13  199.50   21.19
   2 -10 -13  273.30   15.46
  -2  10 -13  232.90   29.49
   2 -10 -13  153.22   21.69
   2 -10  13  216.47   31.94
  -2 -10 -13  298.21   27.24
   2  10 -13  181.55   23.36
  -2 -10 -13  215.90   22.60
   2 -10 -14   46.70    9.41
  -2 -10  14   57.26   16.00
   2 -10 -14   83.86   12.89
  -2  10 -14  124.91   31.70
   2 -10 -14   52.13   24.98
   2 -10  14  102.20   19.17
  -2 -10 -14   95.38   18.47
  -2 -10 -14   79.91   19.19
   2  10 -14   83.27   25.00
  -2  10 -15   35.12   27.12
  -2 -10  15   25.20   13.23
   2 -10 -15   11.49    9.04
   2 -10 -15   61.77   20.67
  -2 -10 -15   24.84   13.47
  -2 -10 -15   35.07   23.91
   2 -10  15   22.54    9.66
   2  10 -15   27.57   22.11
  -2 -10  16  170.53   29.68
   2 -10 -16  129.00   13.48
  -2  10 -16  149.73   29.02
   2 -10 -16   99.03   24.18
   2 -10  16  110.83   19.49
  -2 -10 -16  150.60   25.26
   2  10 -16  131.39   23.10
  -2 -10 -16  142.40   27.71
  -2  10 -17   20.02   18.87
  -2 -10  17   30.89   17.36
   2 -10 -17   14.85    7.56
   2 -10 -17   11.37    8.72
  -2 -10 -17   21.32   15.65
  -2 -10 -17   16.52   12.92
   2 -10  17    5.22   18.92
  -2  10 -18  235.58   45.06
  -2 -10  18  188.98   25.07
   2 -10 -18  227.23   16.80
   2 -10 -18  173.30   25.23
  -2 -10 -18  204.91   22.31
  -2 -10 -18  216.70   28.60
   2 -10  18  222.90   33.44
   2  10 -18  268.10   35.88
  -2  10 -19   77.76   27.52
  -2 -10  19   48.98   16.14
   2 -10 -19   50.63   28.46
  -2 -10 -19   79.33   13.38
  -2 -10 -19   54.86   27.69
   2  10 -19   67.87   28.84
   2 -10  19   47.12   13.56
  -2  10 -20    5.78   12.31
  -2 -10  20   22.22   10.77
   2 -10 -20   11.13   18.34
  -2 -10 -20    8.03   14.14
  -2 -10 -20   13.79    8.51
   2  10 -20   22.00    8.78
   2 -10  20   14.26   11.60
  -2 -10  21   81.93   28.54
  -2  10 -21   57.09   20.61
   2 -10 -21   62.58   20.40
   2 -10  21   74.64   20.40
  -2 -10 -21   76.54   23.68
  -2 -10 -21   33.08   17.54
   2  10 -21   86.74   26.93
  -2  10 -22  250.54   40.71
  -2 -10  22  130.75   22.19
   2 -10 -22  243.05   36.00
  -2 -10 -22  123.79   24.69
  -2 -10 -22  159.07   31.35
   2  10 -22  232.15   52.64
   2 -10  22  161.09   22.83
  -2 -10  23   16.75    9.23
  -2  10 -23   10.80   13.73
   2 -10 -23   21.12   14.82
  -2 -10 -23   17.07   16.48
  -2 -10 -23   28.19   16.60
   2  10 -23   17.38   26.25
  -2 -10  24   12.96    8.28
   2 -10 -24   20.05   19.09
  -2  10 -24   44.08   22.41
   2 -10  24   54.69   15.45
  -2 -10 -24   22.57   14.43
   2  10 -24   11.51   24.82
  -2 -10  25   69.54   17.78
   2 -10 -25   50.68   30.77
  -2  10 -25   31.84   19.74
   2 -10  25   44.19   17.26
  -2 -10 -25   65.10   26.74
   2  10 -25   90.58   30.86
   2 -11   0   59.96   30.21
  -2 -11   0   74.99   15.55
  -2 -11   0   52.64   12.37
   2 -11   0   73.03   18.06
   2 -11  -1 1857.76   84.64
  -2 -11   1 2067.91   96.29
   2 -11  -1 1437.62   73.38
  -2 -11   1 1421.06   69.06
   2 -11   1 1768.43   83.62
   2 -11   1 1451.95   71.78
  -2 -11  -1 2010.77   94.95
  -2 -11  -1 1516.45   72.42
  -2 -11   2  394.69   44.71
   2 -11  -2  370.46   26.90
  -2 -11   2  248.58   21.22
   2 -11  -2  271.68   28.68
   2 -11   2  377.26   28.15
  -2 -11  -2  430.59   32.57
  -2 -11  -2  261.25   22.70
   2 -11   2  266.27   27.10
   2 -11  -3   15.37    9.79
   2 -11  -3   20.70   16.86
   2 -11   3   17.39   11.35
   2 -11   3    9.27   11.86
  -2 -11  -3    6.28   10.67
  -2 -11  -3   10.65   10.31
   2  11  -3    2.92    8.79
  -2 -11   4  255.47   26.86
   2 -11  -4  241.97   18.91
  -2  11  -4  204.59   23.30
   2 -11  -4  188.82   30.34
   2 -11   4  262.89   25.71
  -2 -11  -4  278.71   28.49
   2  11  -4  208.04   29.09
  -2 -11  -4  167.15   20.52
  -2 -11   5 2017.69   96.54
   2 -11  -5 2091.20   93.43
  -2  11  -5 1675.12   81.34
   2 -11  -5 1537.60   77.19
   2 -11   5 2043.02   95.31
  -2 -11  -5 2209.18  101.55
   2  11  -5 1849.39   87.28
  -2 -11  -5 1541.28   73.69
   2 -11  -6   47.13   16.65
  -2 -11   6   98.81   22.42
   2 -11  -6  109.01   15.61
  -2  11  -6  115.51   20.86
  -2 -11  -6  106.42   15.08
  -2  11   6   89.82   10.87
   2 -11   6  110.44   21.44
   2  11  -6   82.95   14.84
  -2 -11  -6   80.03   14.79
  -2 -11   7 1875.43   64.43
   2 -11  -7 2081.97   57.70
   2 -11  -7 1465.79   52.67
  -2  11  -7 1721.56   63.82
   2 -11   7 1703.50   59.65
  -2  11   7 1788.86   50.45
  -2 -11  -7 2087.13   62.88
   2  11  -7 1784.62   57.30
  -2 -11  -7 1418.60   51.48
  -2 -11   8  149.88   24.42
   2 -11  -8  134.22   15.51
   2 -11  -8  147.27   18.59
  -2  11  -8  117.91   23.59
   2 -11   8  139.78   19.24
  -2 -11  -8  154.52   19.99
  -2  11   8  142.86   12.69
  -2 -11  -8  113.99   16.70
   2  11  -8  153.07   34.48
   2 -11  -9  114.15   21.01
  -2 -11   9   95.59   16.48
   2 -11  -9  105.39   14.35
  -2  11  -9  115.39   18.77
  -2 -11  -9  121.45   18.88
  -2  11   9   77.40   12.21
   2 -11   9   91.55   16.99
   2  11  -9   96.38   51.18
  -2 -11  -9   47.75   19.23
  -2 -11  10   10.36    7.80
   2 -11 -10   16.66    8.94
   2 -11 -10   21.48   13.17
  -2  11 -10   12.23   15.54
   2 -11  10   15.35    8.17
  -2 -11 -10    5.40    5.70
  -2  11  10    8.05    7.32
  -2 -11 -10   13.46    9.23
   2  11 -10   13.20   12.27
  -2 -11  11 1831.02   84.09
   2 -11 -11 2125.09   84.99
   2 -11 -11 1630.05   77.32
  -2  11 -11 1969.17   90.53
   2 -11  11 1810.44   87.52
  -2 -11 -11 2011.61   86.46
  -2  11  11 1593.79   65.47
  -2 -11 -11 1704.91   78.69
   2  11 -11 1967.24   89.71
  -2 -11  12   19.77   11.83
   2 -11 -12   10.74    5.42
   2 -11 -12    4.58    6.90
  -2  11 -12    5.46   15.63
   2 -11  12   35.96   19.32
  -2 -11 -12   15.58   13.91
  -2  11  12    6.70    6.50
  -2 -11 -12   15.08   20.86
   2  11 -12   12.01   16.95
  -2 -11  13  461.38   39.01
   2 -11 -13  590.96   36.18
   2 -11 -13  374.69   34.47
  -2  11 -13  652.14   49.60
   2 -11  13  468.09   39.39
  -2 -11 -13  544.89   40.09
  -2 -11 -13  429.99   36.60
   2  11 -13  527.40   50.09
  -2 -11  14   77.21   20.17
   2 -11 -14   47.28   10.86
   2 -11 -14  113.91   29.04
  -2  11 -14   43.20   30.73
   2 -11  14   54.84   19.77
  -2 -11 -14   38.98   17.47
  -2 -11 -14   38.40   26.28
   2  11 -14   40.97   29.38
  -2 -11  15 1129.17   66.22
   2 -11 -15 1461.15   59.33
  -2  11 -15 1352.28   70.91
   2 -11 -15 1011.04   57.48
   2 -11  15 1048.93   61.42
  -2 -11 -15 1145.67   64.35
  -2 -11 -15 1350.02   63.99
   2  11 -15 1299.40   66.77
  -2 -11  16   75.40   19.89
  -2  11 -16  103.99   30.74
   2 -11 -16  103.19   13.40
   2 -11 -16   61.05   35.78
  -2 -11 -16   47.14   19.79
  -2 -11 -16   57.00   26.83
   2  11 -16  109.22   27.17
   2 -11  16   95.40   25.54
  -2  11 -17 1562.82   75.92
  -2 -11  17 1293.31   63.18
   2 -11 -17 1449.61   54.84
   2 -11 -17 1075.74   57.51
  -2 -11 -17 1436.47   62.12
  -2 -11 -17 1129.23   61.22
   2 -11  17 1171.98   63.64
   2  11 -17 1284.39   67.28
  -2 -11  18   29.56   22.97
  -2  11 -18   60.06   18.67
   2 -11 -18   34.09   14.12
   2 -11  18   46.20   20.14
  -2 -11 -18   60.16   33.05
  -2 -11 -18   33.12   14.70
   2  11 -18   18.04   31.57
  -2 -11  19  217.14   26.95
  -2  11 -19  274.85   51.33
   2 -11 -19  262.25   37.49
   2 -11  19  218.05   33.28
  -2 -11 -19  263.09   34.88
  -2 -11 -19  227.47   32.05
   2  11 -19  269.23   32.92
  -2 -11  20   45.99   21.37
   2 -11 -20    4.64    7.71
  -2  11 -20   13.34   19.21
   2 -11  20   39.33   15.78
  -2 -11 -20    3.79    8.47
  -2 -11 -20   16.84    8.19
   2  11 -20   23.25   18.01
  -2  11 -21   32.01   24.62
  -2 -11  21   49.54   18.41
   2 -11 -21   19.88   14.00
  -2 -11 -21   28.51   11.83
  -2 -11 -21   16.06   13.46
   2  11 -21   43.01   25.35
   2 -11  21   55.05   23.77
  -2  11 -22   56.58   23.51
  -2 -11  22   23.28   17.21
   2 -11 -22    6.02   14.11
  -2 -11 -22    4.43    7.14
  -2 -11 -22    8.76   13.82
   2  11 -22   11.26   13.03
   2 -11  22   11.45    7.79
  -2 -11  23  149.61   27.26
   2 -11 -23  114.74   38.43
  -2  11 -23  164.86   36.38
   2 -11  23  154.48   25.66
  -2 -11 -23  147.71   30.61
   2  11 -23  158.77   28.66
  -2 -11  24   26.58   16.37
   2 -11 -24   25.44   26.59
  -2  11 -24   29.79   15.02
   2  11 -24   32.94   31.97
  -2 -11  25   13.35    9.14
   2 -11 -25   26.01   18.09
  -2  11 -25   36.69   19.85
   2 -11  25   24.42   11.56
  -2 -11 -25    6.49   17.40
   2  11 -25   25.32   28.31
   2 -12   0 2043.72   93.50
  -2 -12   0 2197.30  103.22
   2 -12   0 1607.44   83.24
  -2 -12   0 1721.73   82.47
   2 -12  -1  119.84   25.43
  -2 -12   1  115.21   17.04
  -2 -12   1  109.39   20.40
   2 -12  -1   86.24   14.78
  -2 -12  -1  120.60   19.10
   2 -12   1  100.82   18.82
  -2 -12  -1   92.95   15.05
   2 -12   1   67.79   25.32
   2 -12  -2    7.58    6.45
  -2 -12   2   19.72    9.48
   2 -12  -2    5.48   10.66
   2 -12   2    3.93    7.08
  -2 -12  -2   18.27   14.49
  -2 -12  -2    7.68    4.99
   2 -12  -3   32.89   10.05
  -2 -12   3   41.67   18.14
   2 -12  -3   32.06   20.62
   2 -12   3   23.81   15.72
  -2 -12  -3   24.35   15.06
   2 -12   3    9.45   16.10
  -2 -12  -3   28.27   11.85
   2  12  -3   14.57   11.31
  -2 -12   4  748.72   40.36
  -2  12  -4  707.74   41.43
   2 -12  -4  728.60   36.05
   2 -12  -4  553.74   38.52
   2 -12   4  670.09   36.27
  -2 -12  -4  625.22   35.81
   2  12  -4  713.72   38.87
  -2 -12  -4  834.14   44.88
  -2 -12   5   39.10   17.68
   2 -12  -5    7.90    6.93
   2 -12  -5   29.30   16.16
   2 -12   5   11.17    5.72
  -2 -12  -5    8.14   11.42
  -2 -12  -5   13.56    8.29
   2  12  -5   12.80    5.88
  -2 -12   6  113.99   23.81
   2 -12  -6  153.37   16.16
   2 -12  -6  128.05   22.14
  -2  12  -6  131.06   19.67
   2 -12   6  124.28   36.94
  -2 -12  -6  187.00   22.48
  -2 -12  -6   94.01   14.54
   2  12  -6  147.54   24.98
   2 -12  -7  127.79   12.97
  -2  12  -7   67.02   38.73
   2 -12  -7   90.62   15.92
   2 -12   7  144.85   42.30
  -2 -12  -7  124.28   30.58
  -2 -12  -7  162.87   22.16
   2  12  -7   93.20   20.20
  -2  12  -8   51.18   31.16
  -2 -12   8   73.07   16.34
   2 -12  -8   50.41   16.28
   2 -12  -8   43.15   16.09
  -2 -12  -8   76.80   17.11
  -2 -12  -8   88.80   17.10
   2 -12   8   90.30   21.32
   2  12  -8   67.12   41.14
  -2 -12   9  130.74   18.13
   2 -12  -9  134.25   13.53
  -2  12  -9  133.62   30.57
   2 -12  -9  101.20   20.70
   2 -12   9  132.42   27.88
  -2 -12  -9  115.48   16.95
   2  12  -9  123.08   21.34
  -2 -12  -9  112.23   23.30
  -2 -12  10   45.67   21.46
   2 -12 -10   37.78   13.11
  -2  12 -10   27.75   23.29
   2 -12 -10    9.87    9.40
  -2 -12 -10   42.39   24.61
  -2 -12 -10   29.68   25.77
   2  12 -10   23.56   15.37
  -2 -12  11   22.57   16.21
   2 -12 -11   37.04   11.66
   2 -12 -11   25.77   12.92
  -2  12 -11   23.63   14.09
   2 -12  11   26.80   10.84
  -2 -12 -11   43.09   10.93
  -2 -12 -11   17.22    9.10
   2  12 -11   32.12   11.49
  -2 -12  12  552.54   46.19
   2 -12 -12  706.69   42.72
   2 -12 -12  608.59   40.30
  -2  12 -12  575.46   49.91
   2 -12  12  494.27   42.57
  -2 -12 -12  763.99   41.61
  -2 -12 -12  467.84   39.74
   2  12 -12  622.00   48.91
  -2 -12  13  185.92   23.01
   2 -12 -13  227.43   19.40
   2 -12 -13  155.36   22.42
  -2  12 -13  104.87   48.40
   2 -12  13  151.49   34.59
  -2 -12 -13  144.90   20.30
  -2 -12 -13  129.20   28.60
   2  12 -13  135.37   26.76
  -2  12 -14   75.81   52.06
  -2 -12  14   49.66   18.35
   2 -12 -14   41.56    9.66
   2 -12 -14   28.53    7.71
  -2 -12 -14   57.30   16.25
  -2 -12 -14   45.24   35.76
   2 -12  14   68.79   18.69
   2  12 -14   57.99   25.71
  -2 -12  15   48.28   18.18
  -2  12 -15   34.78   36.58
   2 -12 -15   99.44   15.67
   2 -12 -15   86.22   23.23
  -2 -12 -15   55.39   23.47
  -2 -12 -15   41.22   20.03
   2  12 -15   81.29   29.73
   2 -12  15   64.95   24.15
  -2 -12  16  233.98   25.72
  -2  12 -16  308.04   43.94
   2 -12 -16  289.21   23.71
   2 -12 -16  300.67   36.56
  -2 -12 -16  313.69   29.18
  -2 -12 -16  206.75   26.78
   2  12 -16  257.13   41.83
   2 -12  16  201.34   36.90
  -2 -12  17  135.58   22.58
   2 -12 -17  127.88   15.99
  -2  12 -17   84.03   59.14
   2 -12 -17  101.08   28.95
   2 -12  17   77.11   19.52
  -2 -12 -17  111.71   20.76
   2  12 -17  135.81   32.43
  -2 -12 -17   80.64   30.78
  -2  12 -18  403.86   55.92
  -2 -12  18  320.17   41.03
   2 -12 -18  380.64   44.16
  -2 -12 -18  356.94   36.11
  -2 -12 -18  297.96   37.17
   2  12 -18  517.53   45.04
   2 -12  18  350.85   41.55
  -2 -12  19   17.77   11.22
   2 -12 -19    8.10   13.34
  -2  12 -19   12.72   14.20
   2 -12  19   11.16   14.55
  -2 -12 -19    8.12    9.18
  -2 -12 -19   10.85    7.78
   2  12 -19   10.72   19.61
  -2 -12  20   45.72   17.87
   2 -12 -20   27.14   21.89
  -2  12 -20   30.34   14.88
   2 -12  20   20.31   23.30
  -2 -12 -20   15.28    6.14
  -2 -12 -20   10.86   10.22
   2  12 -20    9.31   17.73
  -2 -12  21   46.16   20.02
   2 -12 -21   21.63   22.86
  -2  12 -21   35.50   23.77
  -2 -12 -21   42.32   23.84
   2 -12  21   45.92   21.32
   2  12 -21   34.12   31.82
  -2 -12 -21   53.85   20.61
  -2 -12  22  105.39   28.45
   2 -12 -22  106.50   37.55
  -2  12 -22   61.75   31.46
   2 -12  22   68.51   24.94
  -2 -12 -22   62.87   32.07
   2  12 -22  123.32   36.44
   2 -12 -23   20.92   16.89
  -2 -12  23   10.28   12.76
  -2 -12 -23   17.10   24.97
   2 -12  23    8.03   13.20
   2  12 -23   16.38   17.48
  -2  12 -24   33.99   24.99
  -2 -12  24   24.78   19.18
   2 -12 -24   36.60   29.94
   2 -12  24   43.02   16.13
   2 -13   0 2822.21   79.34
  -2 -13   0 3038.36   87.98
  -2 -13   0 2429.77   71.67
   2 -13   0 2178.67   71.89
  -2 -13   1  259.71   25.12
   2 -13  -1  243.50   32.87
  -2 -13   1  182.23   20.43
   2 -13  -1  172.59   21.70
  -2 -13  -1  272.66   38.98
   2 -13   1  268.50   24.74
   2 -13   1  167.92   23.33
  -2 -13  -1  251.11   26.75
  -2 -13   2  764.96   42.57
   2 -13  -2  799.12   40.27
  -2 -13   2  685.95   39.75
   2 -13  -2  622.46   38.54
   2 -13   2  844.31   45.16
  -2 -13  -2  913.82   46.94
   2 -13   2  656.87   39.55
  -2 -13  -2  653.60   38.09
   2 -13  -3  149.78   19.03
  -2 -13   3  147.86   28.06
   2 -13  -3  100.75   20.93
   2 -13   3  163.37   27.86
  -2 -13  -3  169.54   27.32
   2 -13   3   95.89   18.15
  -2 -13  -3  117.03   20.49
   2  13  -3  122.57   20.14
   2 -13  -4 1983.87   77.89
  -2 -13   4 1937.62   82.79
   2 -13  -4 1497.14   67.91
  -2  13  -4 1606.66   72.15
   2 -13   4 1831.76   78.03
  -2 -13  -4 2114.71   86.07
   2  13  -4 1728.37   73.10
  -2 -13  -4 1546.82   67.87
   2 -13  -5  105.09   19.15
  -2 -13   5   90.79   22.98
   2 -13  -5   63.99   14.76
  -2  13  -5  101.33   18.57
  -2 -13  -5   88.37   23.04
   2 -13   5   79.61   23.27
  -2 -13  -5  101.69   18.06
   2  13  -5   95.08   22.60
  -2 -13   6 1672.11   77.24
  -2  13  -6 1479.87   70.72
   2 -13  -6 1662.43   66.64
   2 -13  -6 1211.73   58.11
  -2 -13  -6 1814.45   77.08
  -2 -13  -6 1418.86   64.64
   2  13  -6 1449.50   64.39
   2 -13   6 1470.26   66.81
  -2 -13   7  122.87   21.43
  -2  13  -7   94.09   21.81
   2 -13  -7  131.92   14.29
   2 -13  -7   58.49   28.95
  -2 -13  -7   62.33   24.56
  -2 -13  -7  107.53   18.49
   2  13  -7   90.86   15.99
   2 -13   7  101.19   20.99
  -2 -13   8  115.48   21.69
  -2  13  -8  103.66   23.51
   2 -13  -8  120.44   15.17
   2 -13  -8   84.43   18.60
  -2 -13  -8  149.73   21.18
  -2 -13  -8   62.86   16.92
   2  13  -8   55.54   39.37
   2 -13   8   60.92   19.68
  -2 -13   9   16.95    8.56
   2 -13  -9    5.64    5.43
   2 -13  -9   19.03    9.26
  -2  13  -9    4.58    8.10
   2 -13   9   10.16    8.33
  -2 -13  -9   17.24   15.15
  -2 -13  -9   18.74   17.64
   2  13  -9   15.32   15.30
  -2  13 -10  126.66   21.90
  -2 -13  10  160.07   23.76
   2 -13 -10  186.95   18.91
   2 -13 -10  147.61   25.01
  -2 -13 -10  190.14   20.59
  -2 -13 -10  129.08   19.76
   2 -13  10  191.04   23.16
   2  13 -10  162.96   29.77
  -2 -13  11  798.76   46.71
   2 -13 -11  875.48   52.47
   2 -13 -11  681.08   43.63
  -2  13 -11  844.68   50.15
   2 -13  11  706.67   46.32
  -2 -13 -11  869.60   45.41
  -2 -13 -11  661.93   41.02
   2  13 -11  744.40   54.72
  -2 -13  12 1012.66   56.53
   2 -13 -12 1168.54   51.73
   2 -13 -12  927.40   54.20
  -2  13 -12  945.43   64.23
   2 -13  12  928.09   58.16
  -2 -13 -12 1157.18   58.24
  -2 -13 -12  867.69   53.22
   2  13 -12 1086.25   58.70
  -2  13 -13    9.52   21.90
  -2 -13  13   26.71   10.76
   2 -13 -13    5.75    9.10
   2 -13 -13   40.44   16.56
  -2 -13 -13   23.42   19.87
  -2 -13 -13   26.65   18.85
   2 -13  13   38.57   21.49
  -2 -13  14   13.28    8.02
   2 -13 -14    9.64    6.56
   2 -13 -14    3.71   16.93
  -2  13 -14    9.37   13.97
   2 -13  14   21.89   12.22
  -2 -13 -14   13.71   11.24
  -2 -13 -14   34.95   14.90
   2  13 -14   19.28   21.52
  -2 -13  15  801.78   52.70
   2 -13 -15  595.38   43.38
   2 -13 -15  833.04   38.33
  -2  13 -15  710.78   53.82
   2 -13  15  672.55   48.16
  -2 -13 -15  678.26   47.96
  -2 -13 -15  817.33   43.37
  -2  13 -16 1282.83   80.38
  -2 -13  16 1016.94   68.03
   2 -13 -16 1521.70   74.64
   2 -13 -16  887.74   57.78
  -2 -13 -16 1415.87   76.43
  -2 -13 -16 1008.52   63.71
   2 -13  16 1013.29   63.63
   2  13 -16 1304.71   79.71
  -2 -13  17  283.60   48.37
   2 -13 -17  235.01   43.23
  -2  13 -17  357.38   45.86
  -2 -13 -17  304.07   36.49
   2 -13  17  260.01   36.32
  -2 -13 -17  281.91   28.15
   2  13 -17  448.27   50.28
  -2 -13  18  579.73   52.09
   2 -13 -18  422.29   43.68
  -2  13 -18  512.80   48.85
  -2 -13 -18  407.01   38.18
   2 -13  18  461.98   44.34
  -2 -13 -18  514.73   41.83
   2  13 -18  502.51   63.21
  -2  13 -19   43.54   24.36
  -2 -13  19   58.80   23.49
   2 -13 -19   26.02   24.04
  -2 -13 -19   25.06   14.05
  -2 -13 -19   30.14   15.13
   2  13 -19   34.94   27.53
   2 -13  19   48.66   35.07
   2 -13 -20    9.26   15.81
  -2 -13  20   14.68    7.27
  -2  13 -20   13.47   10.67
   2 -13  20   39.99   19.70
  -2 -13 -20    9.03   11.25
  -2 -13 -20    8.70    7.81
   2  13 -20   16.21   11.22
  -2  13 -21   27.75   21.27
  -2 -13  21   20.71    8.94
   2 -13 -21   30.69   22.03
  -2 -13 -21   26.96   19.18
  -2 -13 -21   14.39   13.68
   2  13 -21   23.05   11.99
   2 -13  21   30.36   14.70
  -2 -13  22  247.64   38.57
  -2  13 -22  300.83   46.44
   2 -13 -22  299.57   40.09
   2 -13  22  251.59   33.62
   2  13 -22  430.77   41.04
  -2 -13 -22  240.41   32.92
  -2 -13  23   36.56   16.12
   2 -13 -23   28.82   25.29
  -2  13 -23   23.91   11.19
   2 -13  23   33.04   11.68
   2  13 -23   11.40   12.77
   2 -13 -24   37.34   21.11
  -2  13 -24   18.71   21.28
  -2 -13 -24   43.52   27.62
   2  13 -24   30.40   15.87
   2 -14   0  748.22   54.82
  -2 -14   0  822.48   59.43
  -2 -14   0  668.70   40.79
   2 -14   0  625.24   36.05
   2 -14  -1 1604.23   69.33
  -2 -14   1 1721.25   77.98
   2 -14  -1 1307.13   61.53
  -2 -14   1 1506.34   66.89
   2 -14   1 1512.22   66.05
  -2 -14  -1 1782.76   77.01
   2 -14   1 1327.35   63.26
  -2 -14  -1 1300.27   62.77
   2 -14  -2   83.02   17.17
   2 -14  -2   78.72   16.67
  -2 -14   2  109.43   21.69
  -2 -14   2   99.29   15.64
  -2 -14  -2  136.67   27.04
   2 -14   2   67.30   17.57
  -2 -14  -2   78.59   17.34
   2 -14   2  123.46   24.04
   2 -14  -3   11.97    7.91
  -2 -14   3   21.76   11.06
   2 -14  -3   28.48   14.07
   2 -14   3   10.08    6.78
  -2 -14  -3    7.34    7.63
  -2 -14  -3    7.14    7.27
   2 -14   3   20.28   17.22
   2  14  -3    8.70   16.13
  -2 -14   4    2.44    6.98
  -2  14  -4   17.70   17.21
   2 -14  -4   31.58   13.50
   2 -14  -4   27.28   14.67
  -2 -14  -4   22.86    7.85
  -2 -14  -4   28.76   15.55
   2  14  -4   10.50    8.69
   2 -14   4   17.30   15.52
   2 -14  -5  670.91   43.60
  -2 -14   5  945.00   53.44
  -2  14  -5  852.48   50.02
   2 -14   5  829.23   47.27
  -2 -14  -5  658.52   42.89
  -2 -14  -5  891.80   49.50
   2  14  -5  861.50   50.50
  -2 -14   6  446.63   45.74
   2 -14  -6  446.99   37.08
   2 -14  -6  525.13   32.58
  -2  14  -6  459.85   36.14
   2 -14   6  510.01   34.84
  -2 -14  -6  352.81   29.61
  -2 -14  -6  596.82   41.80
   2  14  -6  440.75   34.67
  -2  14  -7  350.72   32.43
  -2 -14   7  586.85   43.05
   2 -14  -7  532.02   47.32
   2 -14  -7  417.72   33.10
  -2 -14  -7  456.53   43.21
  -2 -14  -7  359.29   29.74
   2 -14   7  471.96   44.23
   2  14  -7  382.33   31.70
  -2  14  -8  447.36   36.79
  -2 -14   8  480.56   38.45
   2 -14  -8  533.53   36.58
   2 -14  -8  368.96   34.95
  -2 -14  -8  624.73   45.12
  -2 -14  -8  383.88   32.81
   2 -14   8  540.94   44.81
   2  14  -8  488.92   39.51
  -2 -14   9    6.02    7.24
   2 -14  -9   10.89   12.06
   2 -14  -9   26.97   12.50
   2 -14   9   18.81    7.75
  -2 -14  -9   11.31    5.76
  -2 -14  -9   12.53    9.68
   2  14  -9   25.20   29.40
  -2  14 -10    7.37   21.90
  -2 -14  10   32.69   15.57
   2 -14 -10   15.74    7.27
   2 -14 -10   12.18    7.59
  -2 -14 -10   12.86   11.95
  -2 -14 -10   13.38    7.54
   2 -14  10   17.86    7.80
   2  14 -10   16.12   17.54
  -2  14 -11  334.35   37.39
  -2 -14  11  351.52   37.93
   2 -14 -11  497.42   32.36
   2 -14 -11  331.21   38.23
  -2 -14 -11  432.32   35.07
  -2 -14 -11  292.93   32.88
   2 -14  11  288.83   31.99
   2  14 -11  379.29   34.22
  -2 -14  12   22.13   14.64
   2 -14 -12    9.29    7.91
  -2  14 -12   16.28   15.16
   2 -14 -12   13.05    9.78
   2 -14  12    6.58    8.30
  -2 -14 -12   12.18   13.30
   2  14 -12   18.14   15.61
  -2 -14 -12   19.70   17.35
  -2  14 -13   48.04   38.25
  -2 -14  13   93.42   23.76
   2 -14 -13   84.35   13.85
   2 -14 -13   48.27   23.04
  -2 -14 -13   95.46   20.39
  -2 -14 -13   31.31    9.48
   2 -14  13   68.00   25.03
   2  14 -13   56.56   28.39
  -2 -14  14   19.23   10.07
   2 -14 -14   13.27    7.00
  -2  14 -14   24.79   17.70
   2 -14 -14   16.52   17.72
   2 -14  14   25.11   11.14
  -2 -14 -14   12.27   11.89
   2  14 -14   24.76   19.39
  -2 -14 -14   28.38   18.19
  -2 -14  15   55.15   23.83
   2 -14 -15   46.62   17.01
   2 -14 -15   63.93   13.41
  -2  14 -15   59.57   52.26
   2 -14  15   63.00   27.41
  -2 -14 -15   35.24   12.91
  -2 -14 -15   66.87   27.95
   2  14 -15   97.51   29.07
  -2 -14  16   18.24   15.93
   2 -14 -16    6.63    9.69
  -2  14 -16   11.14   20.64
  -2 -14 -16   25.80   22.47
  -2 -14 -16   28.04   13.03
   2  14 -16   12.97   11.96
  -2 -14  17  442.02   46.91
   2 -14 -17  365.15   44.12
  -2  14 -17  365.24   44.95
   2 -14  17  359.14   36.79
  -2 -14 -17  530.61   46.77
  -2 -14 -17  333.30   35.78
   2  14 -17  409.55   48.65
  -2 -14  18   36.14    8.91
   2 -14 -18   22.13   23.53
  -2  14 -18   34.83   30.16
  -2 -14 -18   29.41   15.59
   2 -14  18   15.23   19.24
   2  14 -18   18.33   28.52
  -2 -14 -18   28.92   14.82
  -2 -14  19   40.03   15.11
   2 -14 -19   42.87   27.65
  -2  14 -19   54.13   17.77
  -2 -14 -19   96.69   27.63
   2 -14  19   39.69   21.91
  -2 -14 -19   72.31   20.18
   2  14 -19   34.90   28.30
  -2  14 -20   32.43   38.63
  -2 -14  20   22.92   16.98
   2 -14 -20   21.28   15.02
  -2 -14 -20   25.33   12.47
  -2 -14 -20   35.57   17.56
   2  14 -20   14.37   11.83
   2 -14  20   27.70   17.10
  -2 -14  21   70.70   17.60
   2 -14 -21   38.11   36.73
  -2  14 -21   77.45   27.84
   2 -14  21   84.49   33.40
  -2 -14 -21   55.50   21.43
   2  14 -21   79.95   29.18
  -2 -14  22   28.36   25.43
   2 -14 -22   20.71   26.93
  -2  14 -22   43.77   24.88
   2 -14  22   11.79    7.30
  -2 -14 -22   28.91   14.93
   2  14 -22   15.16    9.40
  -2 -14  23   70.14   31.96
   2 -14 -23   65.58   44.83
  -2  14 -23  168.22   40.00
   2 -14  23   24.78   16.98
  -2 -14 -23   78.81   31.17
   2  14 -23  114.04   38.82
   2 -15   0  369.48   30.31
  -2 -15   0  401.28   40.08
   2 -15   0  276.80   30.16
  -2 -15   0  272.70   29.62
  -2 -15   1  461.23   33.13
   2 -15  -1  531.05   38.06
  -2 -15   1  420.20   31.37
   2 -15  -1  376.36   32.69
   2 -15   1  473.10   34.80
  -2 -15  -1  540.17   39.56
  -2 -15  -1  394.24   33.72
   2 -15   1  483.24   38.67
   2 -15  -2  130.88   23.20
  -2 -15   2  174.29   29.92
   2 -15  -2   79.01   17.83
  -2 -15   2  111.15   33.15
   2 -15   2  152.55   20.42
  -2 -15  -2  135.09   22.42
  -2 -15  -2   98.92   18.38
   2 -15   2  124.80   20.71
  -2 -15   3  135.50   22.32
   2 -15  -3  139.58   19.21
   2 -15  -3   86.25   19.19
   2 -15   3  101.18   18.32
  -2 -15  -3   84.84   20.41
  -2 -15  -3  152.39   21.38
   2  15  -3  112.36   21.06
   2 -15  -4   21.28   13.53
  -2  15  -4   14.36   11.39
  -2 -15   4   17.67   16.43
   2 -15  -4    9.03   11.97
  -2 -15  -4   17.20   10.83
  -2 -15  -4   19.47    8.84
   2  15  -4    8.38   11.44
   2 -15   4   17.74   12.49
   2 -15  -5  804.69   43.74
  -2 -15   5  765.31   45.62
   2 -15  -5  582.30   39.64
  -2  15  -5  577.48   44.95
   2 -15   5  657.12   46.71
  -2 -15  -5  726.55   48.90
  -2 -15  -5  572.46   37.76
   2  15  -5  559.87   47.35
  -2 -15   6  552.43   47.06
   2 -15  -6  506.71   37.51
   2 -15  -6  306.65   30.53
  -2  15  -6  386.73   39.72
   2 -15   6  459.11   50.77
  -2 -15  -6  543.26   42.58
  -2 -15  -6  373.25   34.06
   2  15  -6  324.46   38.86
  -2 -15   7  124.79   26.63
  -2  15  -7   66.65   32.82
   2 -15  -7  113.51   21.82
   2 -15  -7   90.20   15.61
  -2 -15  -7  116.67   21.87
  -2 -15  -7  113.48   24.99
   2  15  -7  101.03   32.16
   2 -15   7  111.53   27.43
  -2 -15   8   60.77   20.80
   2 -15  -8   57.84   18.59
   2 -15  -8   51.14   10.72
  -2  15  -8   19.41   24.71
   2 -15   8   12.24   22.31
   2  15  -8   28.17   19.17
  -2 -15  -8   54.93   25.72
  -2  15  -9   16.24   19.12
  -2 -15   9    6.30    6.09
   2 -15  -9    9.99    7.36
   2 -15  -9   13.96   22.39
  -2 -15  -9   18.55   18.61
  -2 -15  -9   33.89   17.60
   2 -15   9   34.19   17.04
  -2 -15  10 1152.34   59.69
   2 -15 -10 1389.85   58.17
   2 -15 -10 1036.87   54.55
  -2  15 -10 1150.15   58.35
   2 -15  10 1072.88   55.43
  -2 -15 -10 1367.91   59.70
  -2 -15 -10 1062.85   56.62
   2  15 -10 1264.22   60.34
  -2 -15  11  162.32   23.41
   2 -15 -11  191.48   21.21
   2 -15 -11  178.28   28.52
  -2  15 -11  171.84   35.66
   2 -15  11  136.04   28.27
  -2 -15 -11  261.20   37.95
  -2 -15 -11  126.22   20.29
   2  15 -11  191.95   26.63
  -2 -15  12  589.94   46.51
   2 -15 -12  693.20   36.67
   2 -15 -12  470.61   41.06
  -2  15 -12  588.01   48.48
   2 -15  12  547.03   46.16
  -2 -15 -12  580.70   37.33
  -2 -15 -12  472.02   33.88
   2  15 -12  576.50   48.29
  -2 -15  13  167.17   39.62
   2 -15 -13  221.81   27.20
   2 -15 -13  199.62   27.61
  -2  15 -13  206.58   37.31
   2 -15  13  189.01   30.47
  -2 -15 -13  188.99   23.01
  -2 -15 -13  176.71   20.96
   2  15 -13  167.30   29.40
  -2 -15  14   43.31   18.35
   2 -15 -14   55.71   15.94
  -2  15 -14   25.21   24.02
   2 -15 -14   37.83   12.94
   2 -15  14   77.77   25.88
  -2 -15 -14   48.63   21.80
   2  15 -14   38.79   29.90
  -2 -15 -14   33.50   14.31
  -2 -15  15   22.60   13.39
  -2  15 -15   27.76   26.67
   2 -15 -15   22.25   24.10
   2 -15  15   21.85   12.77
  -2 -15 -15   27.75   18.29
  -2 -15 -15   45.62   24.54
   2  15 -15    7.36   25.87
  -2 -15  16  352.79   34.12
   2 -15 -16  369.94   46.24
  -2  15 -16  382.66   51.09
  -2 -15 -16  538.54   43.36
   2 -15  16  452.08   49.16
   2  15 -16  380.92   39.25
  -2 -15 -16  356.97   40.29
  -2 -15  17  250.16   35.59
   2 -15 -17  288.54   45.23
  -2  15 -17  212.84   36.42
   2 -15  17  254.03   54.46
  -2 -15 -17  290.52   31.66
  -2 -15 -17  171.07   29.58
   2  15 -17  181.09   41.73
   2 -15 -18    7.19   14.73
  -2 -15  18   62.38   20.17
  -2  15 -18    5.95   16.05
   2 -15  18   45.92   17.85
  -2 -15 -18   17.54    8.38
  -2 -15 -18   11.48   12.14
   2  15 -18   42.18   25.58
   2 -15 -19   19.61    6.83
  -2 -15  19    5.78    9.09
  -2 -15 -19   15.97   13.84
   2 -15  19   26.42   15.08
  -2 -15 -19    9.75   10.98
   2  15 -19   23.65   26.75
  -2 -15  20   23.56    9.52
   2 -15 -20   23.24   20.11
  -2  15 -20   22.86   14.15
  -2 -15 -20   27.57   14.34
   2  15 -20   22.58   20.26
  -2 -15  21  228.07   34.36
  -2  15 -21  230.54   42.47
   2 -15 -21  252.32   53.26
  -2 -15 -21  152.40   31.05
   2 -15  21  217.78   33.42
   2  15 -21  215.78   40.46
  -2 -15  22  259.93   38.39
  -2  15 -22  121.44   74.12
   2 -15 -22  228.37   43.83
  -2 -15 -22  115.13   27.38
   2 -15  22  160.76   35.55
   2  15 -22  140.26   47.41
   2 -16   0  334.36   44.50
  -2 -16   0  342.92   34.76
   2 -16   0  260.31   30.46
  -2 -16   0  314.05   30.31
   2 -16  -1  191.71   28.50
  -2 -16   1  166.15   19.61
  -2 -16   1  185.99   28.42
   2 -16  -1  167.99   25.20
   2 -16   1  175.24   41.80
   2 -16   1  190.78   28.74
  -2 -16  -1  199.17   31.88
  -2 -16  -1  144.37   16.50
   2 -16  -2   25.32   17.79
  -2 -16   2   12.59   12.84
  -2 -16   2   16.02   11.66
   2 -16  -2   12.07    9.00
  -2 -16  -2   12.28   11.01
   2 -16   2    4.93   11.77
  -2 -16  -2   15.14   10.60
   2 -16   2   22.77   13.61
   2 -16  -3   78.78   16.72
  -2 -16   3   81.77   23.48
   2 -16  -3   73.81   22.43
   2 -16   3   72.74   18.92
  -2 -16  -3   98.17   22.28
  -2 -16  -3   53.64   12.86
   2  16  -3   34.56   43.59
   2 -16  -4  301.56   37.65
  -2  16  -4  229.38   24.45
  -2 -16   4  249.71   36.08
   2 -16  -4  247.71   32.07
  -2 -16  -4  264.47   32.70
  -2 -16  -4  217.26   24.18
   2  16  -4  223.62   25.76
   2 -16   4  269.73   35.12
   2 -16  -5   15.14   11.47
  -2 -16   5   33.98   22.60
   2 -16  -5   11.42   23.78
  -2  16  -5    9.20   10.88
   2 -16   5    8.63   13.65
  -2 -16  -5   17.25   10.34
  -2 -16  -5    7.34   11.83
   2  16  -5   25.07   16.84
   2 -16  -6  973.19   50.92
   2 -16  -6  696.19   45.26
  -2 -16   6  965.27   56.01
  -2  16  -6  794.48   51.02
   2 -16   6  861.57   51.06
  -2 -16  -6  683.15   41.29
  -2 -16  -6  903.30   52.03
   2  16  -6  911.99   51.66
  -2 -16   7   18.16   12.05
  -2  16  -7   20.61   14.33
   2 -16  -7   16.85    7.29
   2 -16  -7    7.15    5.99
  -2 -16  -7   24.45   20.20
  -2 -16  -7   15.99   12.41
   2  16  -7   17.50   12.21
   2 -16   7   38.51   17.57
  -2  16  -8  238.34   29.36
  -2 -16   8  235.88   26.81
   2 -16  -8  247.68   33.57
   2 -16  -8  354.48   30.31
  -2 -16  -8  248.20   29.85
  -2 -16  -8  370.89   36.93
   2 -16   8  330.92   41.73
   2  16  -8  212.27   25.32
   2 -16  -9   21.84   16.24
  -2 -16   9   26.75   25.13
   2 -16  -9   14.98   17.32
  -2  16  -9   22.44   23.54
  -2 -16  -9   29.12   16.52
   2 -16   9   33.32   27.33
  -2 -16  -9   26.72   10.60
   2  16  -9   15.68   22.31
  -2  16 -10   72.68   17.36
  -2 -16  10  129.87   25.33
   2 -16 -10   89.30   21.64
   2 -16 -10  110.94   20.49
  -2 -16 -10  105.01   22.49
  -2 -16 -10  110.32   20.11
   2 -16  10   95.75   24.91
   2  16 -10  125.75   42.91
  -2 -16  11   43.87   20.76
   2 -16 -11   21.17    9.45
  -2  16 -11   30.00   29.71
   2 -16 -11    6.69   19.79
   2 -16  11   22.61   24.49
  -2 -16 -11   27.14   16.16
   2  16 -11   23.94   22.29
  -2 -16 -11   20.79   13.28
  -2 -16  12  503.57   46.29
   2 -16 -12  500.08   33.99
  -2  16 -12  303.81   37.30
   2 -16 -12  327.77   34.97
   2 -16  12  369.17   35.42
  -2 -16 -12  438.47   45.53
   2  16 -12  459.73   49.43
  -2 -16 -12  290.28   27.42
  -2  16 -13   25.83   35.45
  -2 -16  13   30.04   13.03
   2 -16 -13   21.53   10.51
   2 -16 -13   19.09   24.25
  -2 -16 -13   26.77   19.85
   2  16 -13   31.84   41.19
   2 -16  13   57.23   26.66
  -2  16 -14   10.84    7.18
  -2 -16  14    9.26   11.20
   2 -16 -14   18.03    7.88
  -2 -16 -14   28.54   15.02
  -2 -16 -14   12.20   15.31
   2  16 -14    5.55   11.31
   2 -16  14   31.69   12.71
  -2  16 -15   13.91   19.50
  -2 -16  15   37.85   25.92
   2 -16 -15   22.20   13.43
  -2 -16 -15   21.64   21.12
  -2 -16 -15   14.13   12.10
   2  16 -15   21.74   26.65
   2 -16  15   25.64   16.29
  -2 -16  16   37.54   27.80
  -2  16 -16   52.56   23.85
   2 -16 -16   69.37   17.01
   2 -16  16   31.82   11.77
  -2 -16 -16   64.85   22.50
  -2 -16 -16  100.09   20.38
   2  16 -16   39.48   31.03
  -2  16 -17   38.84   23.21
  -2 -16  17   15.75   18.36
   2 -16 -17   24.76   21.84
  -2 -16 -17   22.32   16.99
  -2 -16 -17    8.42   10.74
   2  16 -17   22.28   16.22
   2 -16  17   34.34   22.19
  -2  16 -18   23.90   23.68
  -2 -16  18   36.80   16.13
   2 -16 -18    7.23   12.94
  -2 -16 -18   22.01   20.87
  -2 -16 -18   11.86   12.45
   2  16 -18   48.75   29.01
   2 -16  18   18.38   15.33
  -2 -16  19   32.05   24.03
   2 -16 -19    2.89   13.64
  -2  16 -19   20.18   20.07
   2 -16  19   31.19   21.62
  -2 -16 -19   21.74   23.51
   2  16 -19   31.65   21.14
  -2 -16  20   17.16   22.02
   2 -16 -20   16.78   25.71
  -2  16 -20   32.56   22.19
   2 -16  20   25.43   13.83
  -2 -16 -20   45.04   19.09
   2  16 -20    6.57   17.38
  -2 -16  21   17.66   16.28
   2 -16 -21   40.03   19.20
  -2  16 -21   31.58   22.88
  -2 -16 -21   33.27   24.63
   2  16 -21    5.56   13.38
   2 -17   0  689.25   44.20
  -2 -17   0  785.43   42.75
   2 -17   0  557.51   43.72
   2 -17  -1  182.94   26.66
  -2 -17   1  127.87   23.41
   2 -17  -1  136.22   21.73
  -2 -17   1  123.38   18.27
   2 -17   1  157.03   24.18
  -2 -17  -1  167.99   32.28
   2 -17   1  133.38   24.28
  -2 -17  -1  126.99   25.08
   2 -17  -2   95.26   22.74
  -2 -17   2  137.96   22.74
   2 -17  -2   97.61   23.59
   2 -17   2   68.64   24.80
  -2 -17  -2   67.66   24.08
   2 -17   2   84.29   25.11
  -2 -17  -2   96.08   25.54
  -2 -17   3   87.80   19.36
   2 -17  -3   73.93   31.52
   2 -17  -3   65.13   14.29
  -2  17  -3  129.39   22.16
   2 -17   3  117.69   21.81
  -2 -17  -3   87.17   20.16
  -2 -17  -3  146.69   26.23
   2  17  -3  109.49   22.28
   2 -17  -4   90.76   22.19
  -2 -17   4  109.30   20.68
   2 -17  -4   56.94   23.80
  -2  17  -4   83.95   19.85
  -2 -17  -4   99.44   21.60
   2 -17   4   92.43   25.75
   2  17  -4   81.54   23.40
  -2 -17  -4   45.07   14.32
   2 -17  -5 1503.38   62.43
   2 -17  -5 1120.45   60.98
  -2 -17   5 1429.82   66.86
  -2  17  -5 1364.84   61.81
   2 -17   5 1299.28   61.70
  -2 -17  -5 1340.35   62.90
  -2 -17  -5 1605.16   68.87
   2  17  -5 1394.15   60.80
  -2 -17   6  107.74   22.27
   2 -17  -6  131.13   20.02
   2 -17  -6  106.72   30.12
  -2  17  -6  159.37   25.17
  -2 -17  -6  126.18   29.47
   2 -17   6   96.28   21.60
   2  17  -6   88.99   21.80
  -2 -17  -6  121.74   26.05
   2 -17  -7 1272.25   56.63
  -2 -17   7 1311.03   67.82
   2 -17  -7  940.53   69.36
  -2  17  -7 1166.67   61.13
  -2 -17  -7 1332.59   64.19
   2 -17   7 1203.01   60.16
   2  17  -7 1133.44   63.64
  -2 -17  -7 1016.78   58.26
  -2 -17   8   13.81   11.10
   2 -17  -8   21.92   20.73
  -2  17  -8   12.40   14.74
   2 -17  -8   15.55   13.80
   2 -17   8   18.27    9.40
  -2 -17  -8   22.07   22.51
   2  17  -8   12.46   16.70
  -2  17  -9   21.09   21.84
  -2 -17   9   52.27   20.05
   2 -17  -9   22.36   15.21
   2 -17  -9   13.76   12.71
  -2 -17  -9    4.46   10.08
  -2 -17  -9   32.84   14.35
   2 -17   9   20.06   14.42
   2  17  -9   15.86   14.35
  -2  17 -10   15.81   20.58
  -2 -17  10   45.68   17.38
   2 -17 -10   14.99   17.66
   2 -17 -10    7.90   10.69
  -2 -17 -10   29.00   14.44
  -2 -17 -10   69.68   16.49
   2 -17  10   16.25   21.57
   2  17 -10    8.47   19.47
  -2  17 -11  555.71   46.62
  -2 -17  11  688.43   57.10
   2 -17 -11  687.03   42.05
   2 -17 -11  392.96   37.18
  -2 -17 -11  663.02   50.90
  -2 -17 -11  445.57   42.77
   2 -17  11  616.07   51.24
   2  17 -11  643.77   50.59
  -2  17 -12   61.06   45.18
  -2 -17  12   51.09   19.13
   2 -17 -12   50.35   15.15
   2 -17 -12   48.95   31.40
  -2 -17 -12   63.58   18.02
  -2 -17 -12   48.94   16.06
   2 -17  12   63.64   19.47
   2  17 -12   34.38   22.88
  -2 -17  13   78.21   35.22
   2 -17 -13  125.92   22.55
  -2  17 -13   91.31   22.44
   2 -17 -13  100.54   34.47
   2 -17  13   72.23   36.49
  -2 -17 -13   95.71   21.79
   2  17 -13  126.89   31.53
  -2 -17 -13   93.60   25.19
   2 -17 -14  100.72   25.90
  -2 -17  14   65.70   24.03
  -2  17 -14   42.48   33.94
   2 -17  14   44.08   17.39
  -2 -17 -14   38.44   17.65
  -2 -17 -14   93.54   20.91
   2  17 -14   48.29   52.77
  -2  17 -15   53.45   27.55
  -2 -17  15  121.65   26.28
   2 -17 -15   77.01   25.29
  -2 -17 -15  101.64   27.21
  -2 -17 -15   83.91   23.07
   2  17 -15   86.05   24.93
   2 -17  15  142.36   31.11
  -2  17 -16   18.94   17.59
  -2 -17  16   13.96   13.79
   2 -17 -16   16.04    9.02
  -2 -17 -16   13.47   12.13
  -2 -17 -16   15.54   11.41
   2  17 -16   31.61   41.20
   2 -17  16   20.71   17.63
  -2 -17  17  344.95   50.91
  -2  17 -17  289.16   45.69
   2 -17 -17  360.06   43.03
   2 -17  17  298.20   42.60
  -2 -17 -17  315.75   34.42
  -2 -17 -17  375.02   37.80
   2  17 -17  357.83   42.62
  -2 -17  18   31.73   14.91
   2 -17 -18   54.54   24.73
  -2  17 -18   38.92   25.35
   2 -17  18   47.78   29.50
  -2 -17 -18   21.86   27.73
   2  17 -18  134.47   39.59
   2 -17 -19    9.13   24.49
  -2 -17  19   15.84   13.53
  -2  17 -19   38.45   34.15
   2 -17  19   12.45   19.89
   2  17 -19   13.12   23.11
  -2 -17 -19   25.72   16.57
  -2 -17  20   24.60   17.34
   2 -17 -20   15.65   19.93
  -2  17 -20   19.02   30.29
   2 -17  20   17.33   14.48
  -2 -17 -20   14.81   19.40
   2  17 -20   13.62   16.19
   2 -18   0   72.18   28.32
  -2 -18   0   75.42   25.50
   2 -18   0   39.10   20.74
  -2 -18   0   37.91   14.70
  -2 -18   1   33.80   17.86
   2 -18  -1   26.69   17.95
  -2 -18   1   30.35   21.79
   2 -18  -1   30.58   23.07
  -2 -18  -1   33.95   14.00
   2 -18   1   50.43   16.48
  -2 -18  -1   30.73   15.28
   2 -18   1   27.77   11.61
   2 -18  -2   39.41   17.90
  -2 -18   2   22.30   16.84
   2 -18  -2   26.71    7.25
  -2 -18  -2   20.81   15.60
   2 -18   2   21.67   21.74
  -2 -18  -2   44.19   18.58
   2 -18   2   20.96    9.76
  -2  18  -3  230.81   31.78
  -2 -18   3  299.93   36.62
   2 -18  -3  288.97   36.14
   2 -18  -3  238.93   35.42
  -2 -18  -3  382.65   38.76
  -2 -18  -3  195.60   21.92
   2 -18   3  328.82   39.36
   2  18  -3  272.95   31.93
  -2  18  -4   31.23   23.17
  -2 -18   4   11.95   21.56
   2 -18  -4   15.17    9.24
   2 -18  -4   22.10    9.35
  -2 -18  -4   10.11    5.76
   2  18  -4   11.82   18.66
   2 -18   4   14.17   14.74
  -2 -18   5  139.09   27.64
   2 -18  -5   74.46   18.70
   2 -18  -5  121.12   20.86
  -2  18  -5   33.98   19.40
   2 -18   5   70.56   21.84
  -2 -18  -5   53.26   15.96
  -2 -18  -5   62.90   21.70
   2  18  -5   83.77   25.26
  -2  18  -6   29.62   26.84
   2 -18  -6   22.65   10.14
  -2 -18   6   37.61   20.08
   2 -18  -6   22.42   12.57
  -2 -18  -6   70.88   26.34
  -2 -18  -6   32.63   17.68
   2 -18   6   34.48   19.93
   2  18  -6   28.88   14.83
  -2 -18   7  428.27   41.27
  -2  18  -7  366.70   36.70
   2 -18  -7  496.70   37.51
   2 -18  -7  283.38   29.98
  -2 -18  -7  505.25   45.11
  -2 -18  -7  285.95   28.81
   2  18  -7  261.91   33.13
   2 -18   7  324.99   37.83
   2 -18  -8   28.48   10.56
  -2  18  -8   39.69   25.29
  -2 -18   8   42.70   26.65
   2 -18  -8   24.68    9.46
  -2 -18  -8   36.71   23.77
  -2 -18  -8   30.25   14.37
   2  18  -8   31.60   25.64
   2 -18   8   32.02   17.49
  -2  18  -9   28.86   17.85
  -2 -18   9   15.26   12.86
   2 -18  -9   36.80   20.61
   2 -18  -9   12.18    8.12
  -2 -18  -9   37.08   16.59
  -2 -18  -9    9.66    5.00
   2 -18   9   20.02   22.12
   2  18  -9   21.67   25.11
   2 -18 -10  111.91   21.56
  -2 -18  10  112.64   29.85
   2 -18 -10   35.90   17.11
  -2  18 -10   75.82   35.29
   2 -18  10   57.07   26.30
  -2 -18 -10  120.29   27.91
   2  18 -10   33.61   39.92
  -2 -18 -10   62.75   24.43
  -2  18 -11  180.86   33.77
  -2 -18  11  251.80   44.31
   2 -18 -11  154.00   26.93
   2 -18 -11  171.70   30.36
  -2 -18 -11  207.95   30.01
  -2 -18 -11  168.69   25.41
   2 -18  11  198.66   32.98
   2  18 -11  162.35   27.93
   2 -18 -12   95.61   20.99
  -2 -18  12  115.16   29.43
   2 -18 -12   35.69   24.59
  -2  18 -12   39.85   20.42
  -2 -18 -12  117.33   26.88
   2 -18  12   80.32   30.58
  -2 -18 -12  100.92   24.86
   2  18 -12   95.85   33.54
  -2  18 -13   21.44   23.83
  -2 -18  13   41.41   18.50
   2 -18 -13   10.50   10.98
  -2 -18 -13    2.10    4.71
  -2 -18 -13   17.71   13.26
   2  18 -13   21.22   28.71
   2 -18  13   18.40   15.70
  -2  18 -14   33.98   31.18
  -2 -18  14   40.24   15.30
   2 -18 -14   19.58   21.57
  -2 -18 -14   25.00   14.12
  -2 -18 -14   35.78   26.70
   2  18 -14   22.07   35.59
   2 -18  14   21.37   13.87
  -2 -18  15  121.17   30.56
   2 -18 -15   37.66   15.53
  -2  18 -15   55.77   28.16
   2 -18  15   50.14   22.76
  -2 -18 -15   67.54   21.72
  -2 -18 -15   93.28   25.82
   2  18 -15   72.39   24.68
  -2 -18  16   16.92    8.37
   2 -18 -16   15.81   12.21
  -2  18 -16   21.32   15.46
  -2 -18 -16   19.50   16.96
   2 -18  16   26.08   17.16
  -2 -18 -16   35.42   17.47
   2  18 -16   18.46   18.47
  -2 -18  17   57.16   23.92
   2 -18 -17   17.50   10.96
  -2  18 -17    7.04    7.74
   2 -18  17   28.81   14.73
  -2 -18 -17   18.08   13.71
   2  18 -17    5.69   12.78
   2 -18 -18   24.05   18.78
  -2 -18  18   26.47   16.80
  -2  18 -18   20.96   23.29
   2 -18  18   16.05   17.92
   2  18 -18    7.10    9.80
  -2 -18 -18   15.32   21.44
   2 -18 -19   13.96    9.05
  -2 -18  19    9.65   10.68
  -2  18 -19    5.89   15.84
  -2 -18 -19   21.90   15.13
   2 -18  19   14.53   13.71
   2  18 -19   20.07   24.14
   2 -19   0  316.55   28.98
  -2 -19   0  292.03   68.96
   2 -19   0  210.29   29.70
  -2 -19   0  209.77   23.84
  -2 -19   1   34.21   17.38
   2 -19  -1    4.93    5.88
  -2 -19   1   18.67   18.58
   2 -19  -1   19.40    9.19
  -2 -19  -1   17.97   14.44
   2 -19   1   10.21   14.32
   2 -19   1    9.79   12.07
  -2 -19  -1   17.93   10.51
   2 -19  -2   50.30   22.87
  -2 -19   2  111.94   24.55
   2 -19  -2   40.01   19.46
   2 -19   2   52.70   31.05
  -2 -19  -2   83.39   18.69
   2 -19   2   37.40   19.64
  -2 -19  -2   26.56    9.84
   2  19  -2   34.00   26.04
  -2 -19   3  244.01   33.72
   2 -19  -3  385.62   33.32
  -2  19  -3  207.98   37.58
   2 -19  -3  219.74   29.47
   2 -19   3  297.11   30.66
  -2 -19  -3  270.44   28.89
  -2 -19  -3  277.92   34.35
   2  19  -3  298.32   31.23
  -2 -19   4  935.13   64.49
   2 -19  -4  887.48   57.62
   2 -19  -4  729.16   53.21
  -2  19  -4  690.37   52.72
   2 -19   4  807.15   56.77
  -2 -19  -4  836.43   57.83
  -2 -19  -4  761.22   52.29
   2  19  -4  633.70   51.15
   2 -19  -5  343.39   36.54
  -2 -19   5  289.25   42.02
   2 -19  -5  320.88   39.30
  -2  19  -5  223.41   31.89
  -2 -19  -5  315.83   41.35
   2 -19   5  194.27   26.29
   2  19  -5  245.85   30.20
  -2 -19  -5  245.89   28.37
   2 -19  -6 1522.01   80.88
  -2 -19   6 1419.99   82.84
   2 -19  -6 1060.69   69.29
  -2  19  -6 1312.76   78.37
   2 -19   6 1305.39   78.44
  -2 -19  -6 1491.47   84.00
  -2 -19  -6 1109.44   66.72
   2  19  -6 1350.10   76.82
   2 -19  -7   82.01   22.08
  -2  19  -7   86.56   24.85
  -2 -19   7   43.88   15.67
   2 -19  -7   92.96   22.39
  -2 -19  -7  125.77   29.79
  -2 -19  -7   58.35   18.19
   2  19  -7  104.23   20.74
   2 -19   7   87.71   20.26
  -2 -19   8  121.03   22.98
   2 -19  -8  151.72   31.35
   2 -19  -8  150.30   25.16
  -2  19  -8  153.13   23.46
   2 -19   8  173.78   26.13
  -2 -19  -8  162.93   25.47
  -2 -19  -8  117.27   22.24
   2  19  -8  186.31   26.17
  -2  19  -9   23.89   17.51
   2 -19  -9    8.93   16.63
  -2 -19   9   33.98   17.99
   2 -19  -9   40.41   12.71
  -2 -19  -9   15.78    9.81
  -2 -19  -9   27.40   11.79
   2 -19   9   40.47   13.94
   2  19  -9   15.38   12.85
  -2 -19  10  395.89   41.64
   2 -19 -10  453.17   51.44
  -2  19 -10  442.00   46.02
   2 -19 -10  330.55   40.35
   2 -19  10  340.00   39.86
  -2 -19 -10  517.46   53.17
   2  19 -10  414.21   42.67
  -2 -19 -10  389.23   40.69
  -2 -19  11   19.20   18.38
   2 -19 -11   26.40   19.83
   2 -19 -11   74.83   26.27
   2 -19  11   29.71   13.91
  -2 -19 -11    3.70   12.17
  -2 -19 -11    5.49   10.59
   2  19 -11   23.07   28.21
  -2  19 -12  355.89   50.30
  -2 -19  12  309.63   35.40
   2 -19 -12  305.92   41.21
  -2 -19 -12  346.11   40.04
  -2 -19 -12  244.19   39.00
   2  19 -12  362.60   49.48
   2 -19  12  265.55   38.74
  -2 -19  13   42.19   26.67
  -2  19 -13   18.15   17.53
   2 -19 -13   31.88   21.60
  -2 -19 -13   24.11    9.76
   2  19 -13   39.17   29.27
  -2 -19 -13   28.29   17.98
   2 -19 -14   28.87   13.94
  -2 -19  14   17.80   14.39
  -2  19 -14   20.02   17.07
   2 -19  14   25.44   16.39
  -2 -19 -14   15.41   15.22
  -2 -19 -14    3.26   14.00
   2  19 -14   14.54   14.35
   2 -19 -15   34.34   23.68
  -2 -19  15   62.71   18.62
  -2  19 -15    9.11   10.66
   2 -19  15   15.05   15.76
  -2 -19 -15   10.19    8.64
  -2 -19 -15    2.40   11.74
   2  19 -15   32.34   25.03
   2 -19 -16  275.32   48.10
  -2 -19  16  350.09   55.08
  -2  19 -16  351.23   57.05
  -2 -19 -16  351.06   55.10
   2 -19  16  333.74   64.38
   2  19 -16  410.47   62.11
  -2 -19  17   32.49   11.28
  -2  19 -17   11.63   23.13
   2 -19 -17   10.05   12.85
  -2 -19 -17   18.38   13.94
   2 -19  17    9.31    9.26
   2  19 -17   23.83   17.55
  -2 -20   0   19.75   16.12
   2 -20   0   19.63   10.14
  -2 -20   0   15.39    7.32
   2 -20   0   44.57   17.76
  -2 -20   1   98.06   16.89
   2 -20  -1   95.58   21.19
   2 -20  -1   82.78   17.17
   2 -20   1  138.71   30.20
  -2 -20  -1  136.86   30.16
  -2 -20  -1   66.60   17.44
   2 -20   1   98.63   23.68
   2 -20  -2   86.49   22.72
  -2 -20   2   42.38   14.71
   2 -20  -2  105.53   28.06
  -2 -20  -2   39.81   24.24
  -2 -20  -2   73.70   20.92
   2 -20   2   83.49   22.22
   2  20  -2   61.78   22.09
  -2 -20   3   23.49   10.79
   2 -20  -3   13.28   12.30
   2 -20  -3   25.97   15.35
  -2  20  -3   16.33   12.44
   2 -20   3    6.03    8.85
  -2 -20  -3   17.12   10.25
  -2 -20  -3   10.25   11.41
   2  20  -3    4.65    9.83
  -2  20  -4   20.98    9.17
  -2 -20   4   34.39   20.05
   2 -20  -4   17.86   11.94
   2 -20  -4   32.31   24.38
  -2 -20  -4   34.30   17.74
  -2 -20  -4    4.24    9.03
   2 -20   4   25.33   13.65
  -2 -20   5  105.25   28.79
   2 -20  -5   85.55   18.24
  -2  20  -5   72.85   26.37
   2 -20  -5   73.10   24.46
   2 -20   5   71.83   34.35
  -2 -20  -5  114.65   24.66
   2  20  -5   42.29   25.86
  -2 -20  -5   92.89   23.50
  -2 -20   6  104.23   29.33
   2 -20  -6   91.67   19.97
   2 -20  -6   55.31   29.93
  -2  20  -6   55.93   20.32
  -2 -20  -6   58.51   27.11
   2 -20   6   60.84   24.87
  -2 -20  -6   50.15   31.79
   2  20  -6   29.49   42.47
  -2 -20   7  138.88   26.40
   2 -20  -7  156.10   23.13
   2 -20  -7  117.93   36.88
  -2  20  -7  107.97   33.09
   2 -20   7   99.56   29.01
  -2 -20  -7  130.48   35.67
  -2 -20  -7  139.70   28.16
   2  20  -7   66.39   39.21
  -2  20  -8   44.01   49.82
   2 -20  -8  109.72   25.85
  -2 -20   8   58.89   24.83
   2 -20  -8   71.00   22.28
  -2 -20  -8   64.07   22.36
  -2 -20  -8   77.24   23.71
   2 -20   8   44.58   20.05
   2  20  -8   49.05   35.67
   2 -20  -9    6.88    7.56
  -2 -20   9   46.36   25.52
   2 -20  -9   41.80   22.34
  -2  20  -9   10.94   11.72
   2 -20   9   12.82   15.71
  -2 -20  -9   23.16   23.68
  -2 -20  -9   31.61   11.76
   2  20  -9   29.57   18.47
  -2  20 -10   24.53   17.90
   2 -20 -10   23.91   21.50
  -2 -20  10   15.07    9.81
   2 -20 -10   25.55   20.58
  -2 -20 -10   39.24   28.94
  -2 -20 -10   28.47   15.99
   2 -20  10   49.84   24.92
   2  20 -10   21.99   14.61
   2 -20 -11  276.40   40.87
  -2 -20  11  271.53   39.71
  -2  20 -11  241.93   53.43
   2 -20  11  240.16   43.20
  -2 -20 -11  283.66   35.59
  -2 -20 -11  398.29   52.38
   2  20 -11  327.37   41.77
  -2 -20  12   15.39   16.12
  -2  20 -12   32.54   18.68
   2 -20 -12   26.50   11.66
   2 -20  12   27.10   10.16
  -2 -20 -12   55.95   16.41
  -2 -20 -12   37.02   25.32
   2  20 -12   20.15   17.39
  -2  20 -13   22.75   21.71
  -2 -20  13   47.15   19.96
   2 -20 -13   13.94    5.81
  -2 -20 -13   26.67   27.94
  -2 -20 -13   18.67    9.90
   2  20 -13   40.47   30.27
   2 -20  13   70.57   24.59
  -2  20 -14   13.79   13.91
  -2 -20  14   17.89   16.25
   2 -20 -14   20.36   14.12
  -2 -20 -14    6.80   10.02
  -2 -20 -14   31.76   15.93
   2  20 -14   18.83   26.55
   2 -20  14   25.45   11.51
  -2 -20  15  175.04   36.67
  -2  20 -15  181.55   40.02
   2 -20 -15   94.01   38.70
   2 -20  15  273.80   47.08
   2  20 -15  216.63   41.84
  -2 -20 -15  222.03   31.37
   2 -20 -16   54.69   23.17
  -2 -20  16   26.65   15.61
  -2  20 -16   36.90   28.39
   2 -20  16   17.90   10.47
   2  20 -16   22.28   23.24
  -2 -20 -16   16.99   15.67
   2 -21   0  509.23   48.75
  -2 -21   0  549.44   55.32
  -2 -21   0  430.83   49.74
   2 -21   0  382.86   44.99
   2 -21  -1  662.72   53.93
   2 -21  -1  468.86   52.73
  -2 -21   1  583.85   83.97
  -2 -21  -1  674.35   58.77
   2 -21   1  386.10   46.38
   2 -21   1  730.48   72.74
  -2 -21  -1  467.75   50.44
   2  21  -1  466.51   42.23
   2 -21  -2   54.55   24.01
  -2 -21   2   11.95   17.41
   2 -21  -2   53.18   29.41
  -2  21  -2   27.98   26.52
  -2 -21  -2   39.39   19.22
   2 -21   2   25.03   20.41
  -2 -21  -2   29.56   19.81
   2  21  -2    6.08   16.22
  -2 -21   3   33.75   26.98
   2 -21  -3   70.08   26.61
  -2  21  -3   16.16   12.86
   2 -21   3   36.33   18.79
  -2 -21  -3   37.99   20.17
   2  21  -3   21.78   11.50
  -2 -21  -3   12.47   14.03
   2 -21  -4  348.88   45.12
  -2 -21   4  379.20   40.12
  -2  21  -4  275.44   37.56
   2 -21  -4  283.18   36.49
   2 -21   4  411.29   49.16
  -2 -21  -4  292.37   46.95
  -2 -21  -4  371.80   51.15
   2  21  -4  290.18   42.12
  -2  21  -5  185.63  446.40
   2 -21  -5  157.37   26.75
  -2 -21   5  175.51   37.25
   2 -21  -5  176.99   31.93
  -2 -21  -5  148.85   39.97
  -2 -21  -5  133.50   34.83
   2 -21   5  200.30   38.89
   2  21  -5  178.02   29.21
  -2 -21   6  143.51   42.11
   2 -21  -6  115.65   24.38
   2 -21  -6  118.46   32.17
  -2  21  -6   57.37   31.16
   2 -21   6   89.08   63.04
  -2 -21  -6   80.93   24.32
  -2 -21  -6   64.93   26.11
   2  21  -6  157.34   29.15
   2 -21  -7   88.47   29.12
  -2 -21   7  121.04   32.40
   2 -21  -7   40.68   16.84
  -2  21  -7  110.09   45.47
   2 -21   7   33.30   23.77
  -2 -21  -7   95.21   23.64
  -2 -21  -7  117.95   33.60
   2  21  -7   68.45   29.90
   2 -21  -8    9.44   11.19
  -2 -21   8   26.90   13.66
  -2  21  -8   23.19   16.24
   2 -21  -8   18.34   12.74
  -2 -21  -8   33.44   21.43
   2  21  -8   12.24   20.50
  -2 -21  -8   19.75   17.56
  -2 -21   9  169.22   42.93
   2 -21  -9  159.79   27.69
  -2  21  -9  141.48   37.32
   2 -21  -9  107.76   24.67
   2 -21   9   90.96   23.68
  -2 -21  -9  136.01   27.32
   2  21  -9   68.53   36.14
  -2 -21  -9   93.23   29.90
  -2 -21  10   48.23   18.39
  -2  21 -10   25.26   20.72
   2 -21 -10   66.77   24.12
   2 -21  10   15.34   11.98
  -2 -21 -10   29.81   21.92
  -2 -21 -10   18.91   14.57
   2  21 -10   20.12   18.45
   2 -21 -11  241.67   28.42
  -2 -21  11  356.36   36.44
  -2  21 -11  339.59   34.86
   2 -21  11  273.06   39.27
  -2 -21 -11  293.51   29.39
  -2 -21 -11  346.74   43.61
   2  21 -11  394.44   45.72
  -2 -21  12   26.40   19.25
  -2  21 -12   38.95   17.98
   2 -21 -12   18.74   20.43
   2 -21  12   21.16   11.51
  -2 -21 -12   41.85   19.97
  -2 -21 -12    8.56   14.95
   2  21 -12   25.46   29.45
  -2  21 -13  131.10   35.24
  -2 -21  13  151.81   27.72
   2 -21 -13   97.01   23.33
  -2 -21 -13  203.19   40.05
  -2 -21 -13  149.57   39.48
   2  21 -13  291.65   46.54
   2 -21  13  255.28   32.59
   2 -21 -14   11.92   15.62
  -2 -21  14   21.94   17.10
  -2  21 -14   26.31   18.38
   2 -21  14   26.09   10.96
  -2 -21 -14   15.34    9.88
  -2 -21 -14   20.49   18.87
   2  21 -14   25.41   18.67
   2 -22   0  536.19   56.78
  -2 -22   0  482.96   50.89
  -2 -22   0  379.08   43.24
   2 -22   0  501.86   53.66
   2 -22  -1   42.29   21.34
  -2 -22   1   37.44   28.71
   2 -22  -1   15.96   10.58
  -2 -22  -1   15.78   20.20
   2 -22   1   25.70   22.63
  -2 -22  -1   30.43   15.23
   2  22  -1   13.66   14.17
  -2 -22   2  140.27   33.22
   2 -22  -2  152.13   36.11
   2 -22  -2  114.56   26.52
  -2  22  -2   99.94   25.23
  -2 -22  -2  133.49   25.54
  -2 -22  -2  169.11   38.22
   2 -22   2   97.70   25.35
   2  22  -2  150.61   29.86
   2 -22  -3   24.76   16.81
  -2 -22   3   35.07   25.17
   2 -22  -3   39.01   21.95
  -2  22  -3   19.24   15.93
   2 -22   3    6.72   15.05
  -2 -22  -3   34.31   21.27
  -2 -22  -3   25.01   18.22
   2  22  -3   16.19   18.44
  -2 -22   4   17.65   13.06
  -2  22  -4   14.55   21.75
   2 -22  -4   31.93   14.99
   2 -22   4   36.18   20.16
  -2 -22  -4   20.26   16.46
  -2 -22  -4   33.02   17.09
   2  22  -4   11.06   16.45
   2 -22  -5   64.38   22.48
  -2 -22   5   32.33   26.66
   2 -22  -5   30.48   12.38
  -2  22  -5   39.01   17.99
   2 -22   5   28.55   18.18
  -2 -22  -5   16.37   11.21
  -2 -22  -5   18.29   17.92
   2  22  -5   30.30   16.89
  -2  22  -6  201.31   26.92
  -2 -22   6  264.32   44.45
   2 -22  -6  229.69   36.18
   2 -22  -6  212.92   28.87
  -2 -22  -6  212.35   30.01
  -2 -22  -6  203.44   29.62
   2 -22   6  166.29   36.58
   2  22  -6  191.45   29.68
  -2 -22   7   12.87    8.91
   2 -22  -7   38.69   19.53
   2 -22  -7   23.58   11.03
  -2  22  -7   16.19   21.10
   2 -22   7   40.12   28.45
  -2 -22  -7   28.73   12.23
  -2 -22  -7   31.43   17.21
   2  22  -7   18.53   16.52
  -2  22  -8    8.61   11.25
  -2 -22   8   33.21    9.67
   2 -22  -8   15.82    8.59
  -2 -22  -8   15.73   10.63
  -2 -22  -8   21.04   20.61
   2  22  -8   31.17   18.75
   2 -22   8   28.18   20.59
   2 -22  -9   14.74   20.83
  -2 -22   9   18.21   10.33
  -2  22  -9    4.87   14.99
  -2 -22  -9   20.12   12.10
   2 -22   9   13.45   10.78
   2  22  -9   14.91   13.93
  -2 -22  10  239.25   35.95
  -2  22 -10  234.17   34.06
   2 -22 -10  226.68   29.23
   2 -22  10  265.36   59.45
  -2 -22 -10  199.96   40.67
  -2 -22 -10  371.50   54.16
   2  22 -10  283.04   35.01
  -2  22 -11   23.89   16.84
  -2 -22  11   11.67   16.24
   2 -22 -11   21.73   18.85
  -2 -22 -11    2.76    7.97
  -2 -22 -11   10.20   11.79
   2  22 -11    6.73   18.97
   2 -22  11   44.80   26.17
  -2  22 -12  187.01   34.14
  -2 -22  12  145.03   31.98
   2 -22 -12   76.51   33.77
  -2 -22 -12  171.46   35.19
  -2 -22 -12  146.40   24.15
   2  22 -12  131.23   56.58
   2 -22  12  197.16   36.51
   2 -23   0  155.47   29.33
  -2 -23   0  172.99   31.76
   2 -23   0  115.54   29.73
   2 -23  -1  538.05   46.20
  -2 -23   1  531.58   46.64
   2 -23  -1  518.65   46.17
  -2  23  -1  425.56   47.26
   2 -23   1  576.51   48.63
  -2 -23  -1  620.33   55.53
  -2 -23  -1  506.95   47.48
   2  23  -1  390.14   46.18
   2 -23  -2  120.05   26.52
  -2  23  -2  130.58   39.09
  -2 -23   2  170.82   31.17
   2 -23  -2   87.30   25.21
   2 -23   2  183.03   47.06
  -2 -23  -2   72.99   25.52
   2  23  -2   92.97   24.03
  -2 -23  -2  109.77   32.39
  -2  23  -3    8.18   12.21
   2 -23  -3   39.28   25.38
   2 -23  -3   37.53   16.64
  -2 -23   3   13.59   14.78
  -2 -23  -3   20.29    9.51
   2 -23   3    9.68    8.73
  -2 -23  -3   36.78   15.31
   2  23  -3   19.73   16.67
  -2 -23   4   38.78   22.19
   2 -23  -4   16.16   11.57
   2 -23  -4   12.88    7.38
  -2  23  -4   12.71   12.11
   2 -23   4   21.11   10.33
  -2 -23  -4   26.41   12.15
  -2 -23  -4   37.49   19.59
   2  23  -4   21.86   22.25
   2 -23  -5  184.06   33.01
  -2 -23   5  223.32   37.57
   2 -23  -5  144.56   31.14
  -2  23  -5  144.98   28.86
   2 -23   5  202.37   32.74
  -2 -23  -5  202.87   31.04
  -2 -23  -5  120.92   25.37
   2  23  -5  165.72   27.24
  -2 -23   6   84.35   24.94
   2 -23  -6   64.90   19.58
   2 -23  -6   88.43   25.03
  -2  23  -6   74.14   23.89
  -2 -23  -6   87.47   23.04
   2 -23   6   48.61   29.26
  -2 -23  -6   46.15   26.45
   2  23  -6   40.48   24.38
  -2  23  -7    7.99   13.68
  -2 -23   7   23.65   15.39
   2 -23  -7   32.23   22.17
   2 -23  -7   34.72   20.42
  -2 -23  -7   21.37    7.77
  -2 -23  -7   43.72   20.74
   2 -23   7   37.62   22.89
   2  23  -7    8.55   19.15
   2 -23  -8   21.36   12.46
  -2 -23   8   20.97   13.78
  -2 -23  -8    9.81   15.37
   2 -23   8   16.73   10.76
  -2 -23  -8   10.11   12.83
   2  23  -8    6.32   19.30
  -2 -23   9   36.08   24.11
  -2  23  -9   39.27   19.50
   2 -23  -9   55.04   26.64
   2 -23   9   28.16   32.84
  -2 -23  -9   44.38   17.20
  -2 -23  -9   37.33   16.13
   2  23  -9   29.96   22.40
  -2 -24   0   99.45   28.80
   2 -24   0   19.88   13.77
   2  24   0   10.58   14.37
   2 -24  -1   68.94   17.48
  -2 -24   1  131.02   25.65
  -2  24  -1   71.33   22.55
   2 -24  -1   55.17   25.68
  -2 -24  -1  134.84   30.81
   2  24  -1   42.67   51.24
   2 -24   1  121.05   33.02
   2 -24  -2   13.01   15.30
  -2 -24   2   26.57   18.63
  -2  24  -2   32.13   20.52
   2 -24   2   32.67   21.53
  -2 -24  -2   10.52    9.14
   2  24  -2   14.70   18.03
  -2 -24  -2   16.31   17.07
   2 -24  -3   28.78   13.23
  -2 -24   3   78.05   33.58
   2 -24  -3   44.50   21.98
  -2  24  -3   25.07   18.37
  -2 -24  -3   49.15   20.23
   2 -24   3   29.48   17.23
  -2 -24  -3   11.72   10.19
   2  24  -3   15.32   27.68
   2 -24  -4    7.86    8.61
  -2  24  -4    9.48   11.82
   2 -24  -4   39.98   21.97
  -2 -24   4   12.94   15.14
  -2 -24  -4   28.31   15.49
   2 -24   4   18.97   10.92
   2  24  -4   20.11   15.49
  -2 -24  -4   21.02   23.71
   3   0   0    5.00    7.91
  -3   0   0    8.85    6.88
  -3   0   0    2.20    1.74
  -3   0   1    7.17    5.25
  -3   0  -1    4.59    7.05
   3   0  -1    4.80    1.85
   3   0   1    2.84    3.38
   3   0  -1    4.12    3.38
  -3   0   1    2.84    2.15
  -3   0  -1    4.56    3.41
   3   0   1    3.09    2.35
   3   0  -2  690.42   31.77
  -3   0   2  711.05   30.91
  -3   0  -2  612.91   28.44
   3   0   2  643.80   30.12
   3   0  -2  667.72   28.45
  -3   0   2  739.86   30.94
  -3   0  -2  771.30   32.21
   3   0   2  756.44   32.06
  -3   0  -3    2.82    2.38
  -3   0   3    1.39    1.11
   3   0  -3    2.63    3.43
  -3   0  -3    7.18    6.85
   3   0  -3   10.19    6.70
  -3   0   3    4.85    6.11
   3   0   3    2.52    3.92
  -3   0  -3    1.06    3.22
  -3   0  -4    9.57    9.48
  -3   0   4   17.22    3.19
   3   0  -4   27.06    7.59
  -3   0  -4    8.15    8.06
   3   0  -4    9.60   10.73
  -3   0   4    6.74    6.52
  -3   0  -4   12.91    8.88
   3   0   4    6.82    6.35
  -3   0  -5   18.00   11.40
  -3   0   5    9.75    4.26
   3   0  -5    4.93    4.91
  -3   0  -5    4.45    5.31
   3   0  -5    4.15    7.80
  -3   0   5    6.55    9.33
  -3   0  -5    5.98    5.43
  -3   0  -6  669.01   33.30
  -3   0   6  701.51   30.67
   3   0  -6  754.33   33.32
   3   0  -6  623.46   51.88
  -3   0   6  726.99   34.42
  -3   0  -6  741.12   36.08
   3   0   6  770.49   37.07
  -3   0  -7   10.67    5.05
  -3   0   7    8.73    5.41
   3   0  -7    5.94    4.84
   3   0  -7    6.80   11.07
  -3   0   7    5.95    8.79
  -3   0  -7    6.51    5.99
   3   0   7    6.16    7.45
   3   0   8 3226.28  136.48
  -3   0  -8 3673.96  153.78
  -3   0   8 3559.89  145.29
   3   0  -8 4251.87  172.85
   3   0  -8 3861.21  160.52
  -3   0   8 4098.34  169.91
  -3   0  -8 3845.70  161.03
   3   0   8 4274.01  177.03
  -3   0   9    6.20    3.91
   3   0  -9    5.75    3.50
   3   0  -9    9.28    6.71
  -3   0   9    8.80    5.53
  -3   0  -9    5.87    3.55
   3   0   9   10.69    9.36
   3   0  10   95.32   14.68
  -3   0  10  105.93   11.10
   3   0 -10  155.20   10.35
   3   0 -10  110.74   15.80
  -3   0 -10   98.35   15.78
  -3   0  11    6.85    5.43
   3   0 -11    3.77    3.31
   3   0 -11    7.86   10.90
   3   0  12 1175.61   60.07
  -3   0  12 1298.57   58.10
   3   0 -12 1555.93   68.56
   3   0 -12 1434.05   71.38
  -3   0 -12 1411.79   69.46
  -3   0  13    6.01    5.54
   3   0  13    7.06    5.37
   3   0 -13    4.42    4.96
   3   0 -13    8.62    7.24
  -3   0 -13    5.72   11.85
  -3   0  14 3963.59   97.15
   3   0  14 3888.74  102.55
   3   0 -14 5296.56  125.29
   3   0 -14 4731.29  122.56
  -3   0 -14 4913.00  128.15
  -3   0 -15   11.43   10.84
  -3   0  16  963.26   44.07
   3   0 -16 1080.02   55.80
  -3   0 -16 1218.28   59.91
  -3   0  17   14.29    4.94
  -3   0 -17    3.34    6.25
   3   0 -17   22.93   15.22
  -3   0 -17    6.33   24.70
  -3   0  18  786.39   42.99
  -3   0 -18  946.02   49.11
   3   0 -18 1153.37   60.23
  -3   0 -18 1077.92   57.01
  -3   0  19    8.97    7.01
  -3   0 -19    6.66    9.76
   3   0 -19   14.69   10.87
  -3   0 -19    2.35    7.97
  -3   0  20  513.09   27.19
  -3   0 -20  630.54   39.87
   3   0 -20  671.69   63.38
  -3   0 -20  660.63   44.57
  -3   0  21    7.10    6.17
  -3   0 -21   11.36    9.60
  -3   0 -21   19.20   18.79
   3   0 -21   14.23   16.83
  -3   0  22   33.28   13.08
  -3   0 -22   18.03   18.60
  -3   0 -22   28.48   15.71
   3   0 -22   23.53   23.72
  -3   0  23    8.82    7.57
  -3   0 -23   14.55    7.46
   3   0 -23    1.43    7.82
  -3   0 -23   10.91   15.26
  -3   0 -24  335.20   36.75
  -3   0 -24  421.74   48.00
   3   0 -24  378.41   46.97
  -3   0 -25    7.68    7.04
   3   0 -25   13.44   14.96
  -3   0 -25    2.47   16.90
  -3   0 -26  539.74   50.94
  -3   0 -26  626.84   57.66
   3   0 -26  729.83   66.32
  -3   0 -27   13.03   15.44
   3   0 -27   20.39    6.33
  -3   0 -27   46.80   33.23
  -3   0 -28   15.81   16.15
   3   0 -28   27.95   28.05
  -3   0 -28   25.66   28.21
  -3   1   0    2.53    2.70
  -3  -1   0    5.13    7.65
   3   1   0    6.75    7.94
  -3   1   0    1.43    3.19
   3  -1   0    8.50    5.16
  -3   1   0    2.06    1.61
  -3   1  -1 2797.95  112.80
  -3   1  -1 2749.17  110.76
  -3  -1   1 3125.47  125.41
  -3  -1  -1 2954.20  120.86
   3   1  -1 3192.40  127.84
  -3  -1   2 1042.56   42.27
  -3   1  -2  850.74   50.18
  -3  -1   2  994.28   43.16
  -3   1  -2 1003.79   41.98
   3   1   2  941.66   20.29
   3  -1  -2  844.35   37.99
   3  -1  -2  874.56   36.85
   3   1   2 1067.87   13.84
  -3  -1  -2  933.87   19.09
  -3   1   2  894.82   37.63
  -3   1   2  944.29   38.57
   3   1  -2  946.60   38.63
   3  -1   2  840.76   37.17
  -3  -1  -2  975.57   39.78
   3  -1   2  970.44   40.76
   3   1  -2 1051.45   18.15
  -3   1  -3   30.10   11.80
  -3   1  -3   20.30   10.00
  -3  -1   3   16.05    8.79
  -3  -1   3   14.79    6.80
   3  -1  -3   17.33    6.29
   3   1   3   21.14   13.54
   3  -1  -3    9.32    6.70
   3   1   3   14.73    7.80
   3   1  -3   10.55    5.71
  -3  -1  -3    8.70    7.91
  -3  -1  -3   16.64    9.75
   3   1  -3   19.38    7.97
  -3   1   3    8.29    7.54
   3  -1   3   18.99    6.60
  -3   1   3   12.48    3.89
   3  -1   3   19.75   11.38
  -3  -1   4  173.97    9.84
  -3   1  -4  198.09   20.32
  -3  -1   4  234.69   14.29
   3   1   4  193.39   17.77
   3  -1  -4  206.16    8.30
   3   1   4  228.52   15.67
   3  -1  -4  164.71   23.52
  -3   1  -4  210.97   13.91
  -3   1   4  217.11   10.83
  -3  -1  -4  202.53   26.46
  -3   1   4  180.19   11.22
   3   1  -4  236.10   14.70
   3  -1   4  184.17   18.78
  -3  -1  -4  220.47   14.56
   3   1  -4  185.89   11.78
   3  -1   4  249.93   16.37
   3  -1  -5 1135.64   45.59
   3   1   5 1058.87   21.60
  -3   1  -5  910.80   23.83
  -3  -1   5 1047.07   20.82
  -3  -1   5 1028.13   43.95
   3  -1  -5  967.97   43.83
  -3   1  -5 1027.57   45.55
  -3  -1  -5  944.61   43.69
  -3  -1  -5  890.83   43.98
  -3   1   5 1035.91   21.75
  -3  -1  -5 1048.52   22.08
   3   1  -5 1132.59   52.17
   3  -1   5 1105.15   22.74
   3  -1   5  868.46   23.73
   3   1  -5 1023.86   45.65
  -3   1   5 1040.36   41.91
  -3   1  -6  263.30   19.82
  -3   1  -6  199.68   16.17
   3  -1  -6  221.19   23.45
  -3  -1   6  281.06   23.06
   3  -1  -6  312.52   14.84
  -3  -1   6  290.94   20.34
  -3   1   6  240.14   12.12
   3   1  -6  324.39   17.64
  -3  -1  -6  231.73   30.00
   3   1  -6  226.42   24.97
  -3   1   6  288.51   20.73
   3  -1   6  194.37   35.12
  -3  -1  -6  255.31   19.26
   3  -1   6  251.82   18.27
  -3   1  -7   11.75    9.65
  -3   1  -7   13.88    9.17
  -3  -1   7    6.40    9.17
  -3  -1   7    4.11    5.28
   3  -1  -7   12.38    4.32
   3  -1  -7   15.53   10.68
   3   1   7    4.61    6.10
  -3   1   7    9.05    3.60
  -3  -1  -7    7.83    8.46
  -3  -1  -7    6.55    5.75
  -3   1   7   13.95    8.54
   3   1  -7   17.42    6.27
  -3  -1  -7   10.43    9.73
   3   1  -7    1.68    5.95
   3  -1   7    9.45   11.20
   3   1   8  640.41   37.53
   3  -1  -8  640.60   32.98
  -3   1  -8  522.05   31.96
  -3   1  -8  609.13   38.15
  -3  -1   8  574.90   32.31
   3  -1  -8  620.83   37.73
  -3  -1   8  655.91   43.46
  -3  -1  -8  516.92   32.67
   3   1  -8  650.50   35.49
  -3  -1  -8  515.26   33.54
  -3   1   8  492.70   25.76
  -3   1   8  620.62   36.18
   3  -1   8  429.62   38.38
   3  -1   8  677.58   39.95
  -3  -1  -8  557.99   34.95
   3  -1  -9  205.46   25.31
  -3  -1   9  247.79   18.12
   3  -1  -9  291.91   17.24
  -3  -1   9  258.11   20.48
  -3   1  -9  272.03   30.37
  -3   1   9  212.70   10.58
  -3  -1  -9  192.09   18.34
   3  -1   9  185.46   15.99
  -3  -1  -9  240.32   19.85
   3   1  -9  235.38   21.87
   3   1  -9  300.07   20.21
   3  -1 -10  417.96   32.35
  -3  -1  10  384.49   23.93
   3  -1 -10  433.99   25.11
  -3   1 -10  359.04   29.06
   3  -1  10  288.80   28.69
   3   1 -10  480.09   27.69
  -3  -1 -10  325.28   32.52
   3   1 -10  318.93   33.70
  -3  -1 -10  343.22   31.45
  -3   1  10  366.47   22.09
   3  -1 -11    2.27    9.35
   3  -1 -11    9.92    6.25
  -3  -1  11    6.67    6.16
  -3   1 -11   14.27   14.26
   3   1 -11    5.43    4.36
  -3   1  11   10.36    4.39
   3  -1  11    9.46   15.40
  -3  -1 -11    5.52    9.93
  -3  -1 -11    5.28    4.22
   3   1 -11    4.43    7.79
   3  -1 -12  425.54   34.77
   3  -1 -12  376.75   20.00
  -3  -1  12  372.58   25.63
   3   1 -12  388.81   28.39
   3  -1  12  273.18   28.34
  -3  -1 -12  279.03   38.80
  -3   1  12  293.75   19.17
  -3  -1 -12  348.05   27.03
   3   1 -12  406.06   28.07
   3  -1 -13   21.22   15.61
   3  -1 -13   58.29   10.28
  -3  -1  13   49.31   11.19
  -3   1 -13   43.71   18.22
   3  -1  13   37.18   17.14
  -3  -1 -13   65.11   37.10
  -3   1  13   41.28    8.22
  -3  -1 -13   50.16   35.85
   3   1 -13   79.79   21.20
   3   1 -13   77.51   16.00
  -3   1 -14   15.05   14.08
  -3  -1  14   10.28   10.84
   3  -1 -14    6.26    9.37
   3  -1 -14   18.43   12.98
  -3   1  14    2.75    4.19
  -3  -1 -14    5.08    8.26
   3  -1  14    3.41    5.14
  -3  -1 -14   19.40   15.87
   3   1 -14   28.82   21.41
  -3   1 -15   71.58   25.37
  -3  -1  15   60.54   18.04
   3  -1 -15  119.95   15.14
   3  -1 -15   83.81   29.52
  -3   1  15   74.94   10.90
  -3  -1 -15   72.40   15.87
   3  -1  15   31.81   31.42
  -3  -1 -15   70.92   19.71
   3   1 -15   56.24   31.21
  -3  -1  16   95.47   12.61
   3  -1 -16  125.58   21.62
  -3   1 -16  127.71   20.68
  -3  -1 -16   95.35   16.86
   3  -1  16   89.25   13.47
  -3   1  16   75.90   14.73
   3   1 -16   82.63   19.17
  -3  -1 -16   91.31   17.09
  -3   1 -17   17.08   20.26
   3  -1 -17    8.17    9.29
  -3  -1  17   11.34    5.47
   3   1 -17    7.94    9.67
  -3   1  17    9.47    4.60
  -3  -1 -17   24.27   17.16
   3  -1  17    9.81    6.31
  -3  -1  18   32.22   11.68
   3  -1 -18   30.24   21.22
  -3   1 -18   21.33   11.65
  -3   1  18   14.01    8.52
   3  -1  18   12.48    9.26
  -3  -1 -18   20.14   16.49
  -3  -1 -18   20.63   16.13
   3   1 -18   16.84   15.91
  -3  -1  19   47.76    9.86
   3  -1 -19   43.67   49.16
  -3   1 -19   43.51   18.48
   3  -1  19   81.84   18.29
  -3   1  19   58.28   10.53
  -3  -1 -19   32.55   19.15
  -3  -1 -19   62.72   15.62
   3   1 -19   40.65   23.42
  -3   1 -20   21.63   16.48
  -3  -1  20   23.30    9.58
   3  -1 -20   26.05   22.81
  -3  -1 -20    4.32    9.76
  -3  -1 -20   43.85   16.74
   3   1 -20   15.95   15.17
  -3   1  20   20.66   12.84
  -3  -1  21   19.54    9.35
  -3   1 -21   15.84   16.51
  -3   1 -21   13.84   12.55
   3  -1 -21   18.99   13.90
  -3  -1 -21   18.91   15.63
  -3  -1 -21   12.72   16.37
   3   1 -21   17.57   19.85
  -3  -1  22   20.90   11.23
  -3   1 -22   11.69    8.61
  -3   1 -22    7.11   11.45
   3  -1 -22   12.84    9.03
   3  -1 -22   20.83   24.88
  -3  -1 -22   15.85   17.89
   3   1 -22   21.40   24.82
  -3  -1 -22   27.34   17.98
  -3  -1  23   14.61    7.56
  -3   1 -23   26.15   11.24
   3  -1 -23   11.47   13.20
  -3   1 -23   11.95   11.51
   3  -1 -23   70.04   38.89
  -3  -1 -23   35.35   19.85
   3   1 -23   30.76   23.41
  -3  -1 -23   25.46   22.75
  -3  -1  24   18.52   10.34
   3  -1 -24   18.74   12.13
  -3   1 -24   23.51   18.68
   3  -1 -24   25.21   26.36
  -3   1 -24   27.49   17.25
  -3  -1 -24   30.03   22.78
  -3   1 -25   22.54   18.08
   3  -1 -25   17.30   14.47
  -3   1 -25    9.84   12.17
  -3  -1 -25   21.62   26.67
   3   1 -25   36.51   31.92
  -3  -1 -25    8.47   12.74
  -3   1 -26   22.22   17.40
   3  -1 -26   15.67   15.44
  -3   1 -26   32.07   14.11
   3   1 -26   13.86   11.48
  -3  -1 -26   25.12   20.43
  -3  -1 -26   19.18   29.09
  -3   1 -27   11.59   18.03
  -3   1 -27   10.87   14.80
  -3  -1 -27   40.87   21.41
  -3  -1 -27   19.76   22.74
   3   1 -27   42.16   24.42
  -3   1 -28    4.64   14.90
   3  -1 -28   33.33   20.75
  -3  -1 -28   13.01   12.27
  -3  -1 -28   21.89   17.05
   3  -2   0    6.27    3.81
   3   2   0    4.60    5.75
  -3  -2   0    9.73    6.23
  -3  -2   0    2.65    2.00
   3  -2   0   10.60    6.44
   3   2   0    4.78    2.74
   3  -2  -1   34.55    7.48
   3   2   1   35.95    9.30
   3   2   1   34.04    8.82
  -3   2  -1   51.03   10.42
  -3  -2   1   29.20   16.42
   3  -2  -1   20.16   11.19
  -3   2  -1   33.29    9.63
  -3  -2  -1   53.61   10.42
   3  -2   1   12.76   10.71
   3   2  -1   30.71    4.14
  -3   2   1   23.71    6.51
  -3   2   1   29.46    6.07
   3   2  -1   37.34    8.23
  -3  -2  -1   26.01    3.50
   3  -2   1   18.93    9.29
   3   2   2 1964.40   79.26
  -3   2  -2 1803.31   75.82
  -3   2  -2 1687.59   72.47
  -3  -2   2 2049.87   85.72
  -3   2  -2 1745.89   71.95
   3   2   2 1800.92   76.15
   3  -2  -2 1536.60   63.67
   3   2  -2 2017.27   82.81
  -3   2   2 1632.35   65.44
  -3  -2  -2 1751.42   73.12
  -3   2   2 1714.65   70.55
  -3  -2  -2 1766.12   71.22
  -3   2   2 1660.38   90.23
   3  -2   2 1628.35  156.61
  -3  -2   4 1765.61   73.28
  -3   2  -4 1383.75   59.98
  -3  -2   4 1723.00   72.86
   3  -2  -4 1457.45   62.21
   3   2   4 1762.83   73.27
   3   2   4 1519.18   65.54
  -3   2  -4 1649.91   69.64
   3   2  -4 1821.86   75.23
  -3  -2  -4 1656.67   68.81
   3   2  -4 1619.78   67.32
  -3  -2  -4 1401.20   61.86
  -3   2   4 1609.40   67.90
   3  -2   4 1260.39   62.80
   3  -2   4 1592.80   67.22
   3  -2  -5  542.20   28.96
  -3   2  -5  565.34   43.95
  -3  -2   5  645.14   31.21
   3   2   5  666.92   31.61
  -3  -2   5  671.78   31.36
   3   2   5  556.47   30.25
  -3   2  -5  610.10   31.10
   3  -2   5  344.83  167.22
  -3  -2  -5  567.75   28.66
   3   2  -5  692.64   31.41
  -3  -2  -5  460.96   27.85
  -3   2   5  573.98   29.15
   3  -2   5  653.59   33.23
   3  -2  -6  848.86   41.13
  -3   2  -6  843.92   40.08
  -3  -2   6  939.94   41.67
  -3   2  -6  990.62   47.43
   3   2   6  850.63   40.24
  -3  -2   6  981.06   44.05
   3   2  -6  989.91   43.42
   3  -2   6  705.31  215.15
  -3  -2  -6  858.78   39.90
   3   2  -6  954.51   45.41
  -3  -2  -6  780.86   38.04
  -3   2   6  996.07   45.36
   3  -2   6  959.03   44.45
  -3   2  -7 3312.99  136.92
   3   2   7 3637.35  148.48
  -3   2  -7 3113.63  129.26
  -3  -2   7 3319.93  135.14
  -3  -2   7 3548.87  144.56
   3  -2  -7 2935.09  121.44
  -3  -2  -7 3162.48  131.14
  -3   2   7 3517.30  144.00
  -3  -2  -7 3188.92  131.22
   3   2  -7 3360.69  138.08
   3   2  -7 3725.04  150.54
  -3  -2  -7 2838.71  118.00
   3  -2   7 2638.67  110.45
   3  -2   7 3631.94  149.37
  -3   2  -8  114.87   13.75
  -3  -2   8   89.02   39.31
  -3  -2   8  129.46   17.22
   3  -2  -8  150.67    8.32
   3   2   8  162.48   16.17
   3  -2  -8  112.99   13.62
  -3   2   8   88.57   11.76
   3   2  -8  172.58   12.54
  -3  -2  -8  132.56   68.44
  -3  -2  -8  126.30   16.55
   3   2  -8  112.05   16.33
  -3   2   8  105.57   12.13
  -3  -2  -8  117.12   14.95
   3  -2   8   81.49   46.69
   3  -2   8  135.07   17.49
  -3  -2   9 5696.19  232.33
  -3   2  -9 6205.51   61.94
   3  -2  -9 5561.77  229.60
  -3  -2  -9 5055.10   55.51
   3   2  -9 5882.56  241.97
  -3  -2  -9 5877.48   58.31
   3  -2 -10    9.76    4.52
   3  -2 -10    9.13    8.72
  -3  -2  10   10.90    6.32
  -3   2 -10    9.57    5.21
  -3   2  10    3.29    3.59
   3   2 -10    8.62    6.55
  -3  -2 -10   11.01   21.66
   3  -2  10    1.86    6.25
  -3  -2 -10   10.60    8.67
   3   2 -10    9.88    8.66
  -3   2 -11   25.06   11.16
  -3  -2  11   11.76   10.23
   3  -2 -11   13.01    6.00
   3  -2  11    5.40    8.88
   3   2 -11   10.61   10.59
  -3  -2 -11   73.29  102.03
  -3   2  11    9.39    6.44
   3   2 -11    6.13    6.63
  -3  -2  12 2741.18  120.01
   3  -2 -12 3032.84  128.32
   3  -2 -12 2752.06  124.12
  -3   2 -12 3053.24  135.83
   3  -2  12 2241.07  208.19
   3   2 -12 3237.54  139.35
  -3  -2 -12 2545.21  114.07
  -3  -2 -12 2885.96  128.90
   3   2 -12 2906.52  131.04
  -3   2 -13 2678.87  126.65
  -3  -2  13 2542.55  112.58
   3  -2 -13 2772.60  118.05
  -3   2  13 1920.45   93.47
  -3  -2 -13 2300.42  106.79
  -3  -2 -13 2593.55  117.32
   3  -2  13 2140.50   99.49
   3   2 -13 2706.32  122.21
   3  -2 -14  505.78   40.79
  -3  -2  14  515.52   28.10
   3  -2 -14  405.04  177.64
  -3   2 -14  560.77   46.70
  -3   2  14  424.51   26.90
   3  -2  14  440.13   30.64
  -3  -2 -14  372.14  194.25
  -3  -2 -14  547.42   35.18
   3   2 -14  476.82   33.39
  -3   2 -15 1740.35   66.21
  -3  -2  15 1767.19   53.53
   3  -2 -15 2069.00   55.44
   3  -2 -15 1888.14   63.89
  -3  -2 -15 1595.49   53.35
  -3  -2 -15 1847.61   62.80
   3  -2  15 1614.42   59.23
   3   2 -15 1915.97   62.82
  -3  -2  16  243.39   18.36
   3  -2 -16  242.78   20.43
   3  -2 -16  187.50   90.25
  -3   2 -16  304.20   35.70
   3  -2  16  209.36   26.33
  -3  -2 -16  154.82   75.54
  -3  -2 -16  225.98   24.66
   3   2 -16  221.02   56.03
  -3  -2  17   99.94   14.66
   3  -2 -17   78.62   55.50
  -3   2 -17  126.07   29.92
   3  -2  17  130.04   20.06
  -3  -2 -17  117.87   18.06
  -3  -2 -17  169.89   20.91
   3   2 -17   95.87   19.00
  -3  -2  18   48.75   10.46
  -3   2 -18   10.38   22.72
   3  -2 -18   53.83   12.38
   3  -2 -18   28.64   16.27
  -3  -2 -18   36.96   29.47
  -3  -2 -18   33.31   30.99
   3   2 -18   77.55   27.69
   3  -2  18   32.84   12.39
   3  -2 -19 1520.45   64.05
  -3  -2  19 1434.87   62.60
   3  -2 -19 1821.86   83.99
  -3   2 -19 1740.76   80.25
  -3  -2 -19 1570.97   71.18
   3  -2  19 1652.83   73.56
  -3  -2 -19 1767.67   81.68
   3   2 -19 1935.03   88.08
   3  -2 -20    3.14    6.47
  -3  -2  20   21.99    9.79
   3  -2 -20   24.60   25.55
  -3   2 -20  190.17  103.04
   3  -2  20   13.27   16.53
  -3  -2 -20   18.97    8.17
   3   2 -20   23.83    8.43
  -3  -2 -20   16.26   18.38
  -3  -2  21  192.56   19.15
   3  -2 -21  249.16   23.81
  -3   2 -21  306.27   41.55
   3  -2 -21  287.11   39.57
   3  -2  21  207.01   22.64
  -3  -2 -21  216.63   24.94
   3   2 -21  309.86   37.96
  -3  -2 -21  241.77   28.01
  -3  -2  22   28.57   11.81
  -3   2 -22   34.81   21.28
   3  -2 -22   11.49    8.23
   3  -2 -22   24.55   19.01
  -3  -2 -22   38.97   17.82
   3   2 -22    7.65   22.48
  -3  -2 -22   31.05   23.80
   3  -2  22   60.46   12.89
  -3  -2  23   73.47   13.45
   3  -2 -23   65.13   19.67
   3  -2 -23   94.06   24.85
  -3   2 -23   96.36   29.85
  -3  -2 -23   37.24   26.69
   3   2 -23   83.45   44.78
  -3  -2 -23   39.56   25.88
  -3  -2  24   25.06   14.29
  -3   2 -24    6.19   13.05
   3  -2 -24    9.09   14.61
  -3   2 -24   26.77   17.72
  -3  -2 -24    8.67   11.11
  -3  -2 -24    3.16   13.32
   3   2 -24   32.69   24.93
  -3  -2  25  332.71   36.32
   3  -2 -25  442.63   48.30
  -3   2 -25  437.91   46.53
  -3   2 -25  545.85   66.84
  -3  -2 -25  414.00   56.33
  -3  -2 -25  524.82   57.41
   3   2 -25  439.46   68.35
  -3   2 -26  117.74   29.45
  -3   2 -26  101.85   29.79
   3  -2 -26  118.26   34.47
  -3  -2 -26   23.96   19.04
  -3  -2 -26   45.95   39.50
   3   2 -26   84.79   27.00
  -3   2 -27  209.22   36.41
  -3   2 -27  251.16   31.24
   3  -2 -27  227.13   30.20
  -3  -2 -27  177.81   25.64
  -3  -2 -27  181.76   28.57
   3   2 -27  254.85   35.95
  -3   2 -28    4.55    8.95
  -3   2 -28   22.07   16.86
  -3  -2 -28    7.10    7.18
  -3  -2 -28   18.26   12.97
   3   2 -28   36.16   20.13
  -3  -3   0   10.17    8.77
   3   3   0    4.26    4.90
   3  -3   0    1.75    4.90
  -3  -3   0    2.06    1.74
   3   3   0   17.34    5.94
  -3   3   0    4.63    4.48
   3  -3  -1 1086.72   46.16
  -3  -3   1 1349.44   58.67
  -3   3  -1 1143.40   51.19
  -3   3  -1 1080.30   47.24
   3   3   1 1260.22   55.38
   3   3   1 1142.67   47.20
   3  -3  -1 1028.04   47.16
   3  -3   1 1015.37   43.40
  -3  -3  -1 1237.17   53.58
  -3   3   1 1214.93   50.20
   3   3  -1 1070.71   44.35
   3   3  -1 1382.05   60.53
  -3   3   1 1025.47   44.71
  -3  -3  -1  998.23   41.45
   3  -3   1 1075.46   46.73
   3   3  -1 1179.71   48.37
   3  -3  -2  926.18   38.40
  -3   3  -2 1014.91   55.27
  -3   3  -2  946.46   20.56
  -3  -3   2 1106.09   48.36
   3   3   2 1053.35   47.66
  -3   3  -2  958.98   43.10
   3  -3  -2  865.70   19.62
  -3  -3   2 1010.38   42.53
   3   3   2 1094.97   46.09
   3  -3   2  892.82   45.06
   3   3  -2 1236.39   53.42
  -3  -3  -2 1061.77   47.94
  -3  -3  -2  888.15   37.25
   3   3  -2 1083.33   47.48
  -3   3   2  911.48   20.59
  -3   3   2 1045.91   42.38
  -3  -3   3    4.45    6.75
  -3   3  -3   13.52    5.74
   3  -3  -3    5.40    5.07
   3   3   3    6.66    5.24
   3   3   3    6.72    4.93
  -3   3  -3   14.06    9.91
  -3  -3  -3   14.39    9.29
  -3  -3  -3    4.49    3.86
  -3   3   3    8.03    6.97
   3   3  -3   19.48   11.98
   3   3  -3    6.97    2.87
  -3   3   3   11.63    2.74
   3  -3   3   22.16    8.37
  -3   3  -4 1132.29   50.12
  -3   3  -4 1064.87   47.76
  -3  -3   4 1178.39   24.22
   3  -3  -4  956.76   46.20
   3   3   4 1222.12   52.52
   3   3   4  916.95   24.68
  -3  -3   4 1172.10   50.83
   3   3  -4 1297.64   57.02
  -3   3   4 1126.71   50.42
  -3  -3  -4 1106.79   48.05
  -3  -3  -4 1023.15   91.53
   3  -3   4 1134.34   50.80
   3  -3   4  906.71   42.49
   3   3  -4 1222.72   52.43
   3  -3  -5  312.92   34.88
  -3   3  -5  362.47   22.01
  -3  -3   5  410.61   33.64
   3   3   5  439.98   23.74
   3   3   5  303.12   19.26
  -3  -3   5  430.60   23.45
  -3  -3  -5  313.47   26.25
   3  -3   5  334.02   33.65
  -3  -3  -5  390.69   22.92
   3   3  -5  415.23   24.53
   3   3  -5  339.82   31.08
  -3   3   5  388.25   29.94
   3  -3   5  373.90   24.36
   3  -3  -6  111.29   13.59
  -3   3  -6  130.24   15.65
  -3  -3   6  130.70   15.15
   3   3   6  147.72   12.51
   3   3   6   78.15   33.92
  -3   3  -6  166.67   18.08
  -3  -3  -6  134.50   16.07
   3  -3   6  136.83   22.74
  -3  -3  -6  119.94   14.31
   3   3  -6  160.70   12.33
   3   3  -6  140.52   14.41
  -3   3   6  125.78   13.76
   3  -3   6  132.25   15.93
  -3  -3   7   16.07    6.85
  -3   3  -7    9.84    7.68
   3  -3  -7   21.40    3.09
  -3  -3   7   34.56   13.35
   3  -3  -7   31.22   17.83
   3   3   7   29.10    9.44
   3   3   7   17.22    7.99
  -3   3  -7   16.28    9.53
  -3   3   7   15.03    8.95
  -3  -3  -7   14.65    9.43
   3   3  -7   17.49    7.83
  -3  -3  -7   13.77    7.87
   3  -3   7   23.56   11.54
   3   3  -7   16.40   12.86
   3  -3   7   13.18   16.99
  -3   3  -8   49.16   12.22
   3  -3  -8   57.53    4.86
  -3  -3   8   57.00   11.04
  -3  -3   8   43.20    9.50
   3  -3  -8   59.51   15.39
   3   3   8   48.40   10.85
   3  -3   8   61.73   15.61
  -3  -3  -8   53.80   31.00
   3   3  -8   49.54   22.06
   3   3  -8   92.83   12.99
  -3  -3  -8   45.47   24.34
   3  -3  -9  314.52   24.10
   3  -3  -9  405.48   21.17
  -3  -3   9  347.97   22.72
  -3   3  -9  331.57   26.72
   3  -3  -9  309.40   17.74
  -3  -3  -9  400.48   30.37
   3  -3   9  313.46   37.07
  -3  -3  -9  354.42   33.94
   3   3  -9  308.14   31.15
   3   3  -9  452.03   27.72
   3  -3 -10  130.46   18.53
  -3  -3  10  178.34   16.70
   3  -3 -10  182.42   15.57
  -3   3 -10  157.34   21.92
   3  -3 -10  131.95    9.17
  -3  -3 -10  121.22   26.02
   3  -3  10  152.07   27.34
  -3  -3 -10  220.27   20.39
   3   3 -10  152.81   19.99
   3   3 -10  214.62   16.81
   3  -3 -11    2.12    4.61
  -3  -3  11    3.85    4.13
   3  -3 -11    5.57    6.10
   3  -3 -11    5.07    7.98
  -3   3 -11    1.84    8.18
   3  -3  11    9.10   12.04
  -3  -3 -11    9.94   11.83
  -3  -3 -11   12.12    6.15
   3   3 -11   16.04    6.96
   3  -3 -12  107.80   17.16
  -3  -3  12  124.25   16.60
   3  -3 -12  124.11   10.25
   3  -3 -12   92.30    9.37
  -3   3 -12   91.49   37.58
  -3  -3 -12  112.79   17.02
   3  -3  12  111.37   24.09
  -3  -3 -12  117.53   18.36
   3   3 -12  127.45   24.13
   3  -3 -13  332.39   28.79
  -3  -3  13  296.51   22.92
   3  -3 -13  399.45   22.21
   3  -3 -13  291.41   19.51
  -3   3 -13  266.14   28.46
  -3  -3 -13  305.80   24.50
   3  -3  13  238.49   25.06
  -3  -3 -13  318.20   36.27
   3   3 -13  345.09   35.49
   3  -3 -14   22.34   27.10
  -3  -3  14   32.19    7.50
   3  -3 -14   19.32    4.53
   3  -3 -14   13.43    6.31
  -3   3 -14   20.82   19.64
  -3  -3 -14   19.61    8.21
  -3  -3 -14    6.58    8.56
   3  -3  14    7.48    4.65
   3   3 -14   50.47   20.60
   3  -3 -15    7.94   21.71
  -3  -3  15   11.56    5.49
   3  -3 -15    4.67    5.38
   3  -3 -15    4.78    9.79
  -3   3 -15   12.04   13.51
  -3  -3 -15   17.61   14.41
   3  -3  15   24.40   14.93
   3   3 -15   13.40   10.16
  -3  -3 -15   11.10    9.85
   3  -3 -16   25.88   19.10
  -3  -3  16   39.41   11.51
   3  -3 -16   25.44    5.58
   3  -3 -16   19.61   10.11
  -3   3 -16   15.30   13.96
  -3  -3 -16    9.25    8.56
  -3  -3 -16   25.54   18.12
   3  -3  16   28.06   14.25
   3   3 -16   13.34   10.10
  -3  -3  17  146.81   19.34
   3  -3 -17  113.55   15.58
   3  -3 -17   98.95   11.42
   3  -3 -17   74.45   27.46
  -3   3 -17  126.91   49.11
   3  -3  17   84.97   17.58
  -3  -3 -17  108.30   20.93
  -3  -3 -17  161.26   20.55
   3   3 -17  150.47   29.43
   3  -3 -18   24.95   13.35
  -3  -3  18   32.52   14.14
   3  -3 -18   15.02   20.50
  -3   3 -18   38.07   17.09
  -3  -3 -18    9.96   10.08
   3  -3  18   25.32   11.04
  -3  -3 -18   11.37   18.86
   3   3 -18   22.47   16.21
  -3   3 -19    6.57   12.94
  -3  -3  19   24.68   13.84
   3  -3 -19   30.28   25.65
   3  -3 -19   13.47   13.29
  -3  -3 -19   32.06   31.13
  -3  -3 -19   28.93   16.39
   3  -3  19   15.34    7.98
   3   3 -19   11.35   11.07
  -3  -3  20   53.34   13.19
  -3   3 -20   42.11   29.44
   3  -3 -20   73.55   13.58
   3  -3 -20   48.57   17.51
  -3  -3 -20   79.11   16.88
  -3  -3 -20  124.34   26.65
   3   3 -20  121.44   19.48
   3  -3  20   94.95   22.13
  -3  -3  21   77.84   12.86
  -3   3 -21  106.70   35.20
   3  -3 -21   69.95   11.94
   3  -3 -21   89.15   30.37
  -3  -3 -21  106.93   28.85
  -3  -3 -21   81.98   28.18
   3   3 -21   72.25   25.91
   3  -3  21   91.40   18.91
  -3   3 -22   52.94   28.29
  -3  -3  22   20.08    6.89
   3  -3 -22   11.16   16.32
   3  -3 -22   32.47   25.61
  -3  -3 -22   14.50   13.56
  -3  -3 -22   12.62   15.93
   3  -3  22   20.19    9.76
   3   3 -22   31.62   21.66
  -3  -3  23   20.08    9.21
   3  -3 -23  106.46   26.18
  -3   3 -23   98.42   29.07
   3  -3  23   35.99   10.20
   3   3 -23  102.64   27.29
  -3  -3 -23   62.50   31.43
  -3  -3 -23   50.36   22.29
  -3   3 -24   25.11   11.16
  -3  -3  24   15.91    9.15
   3  -3 -24   21.24   27.18
  -3  -3 -24   14.64   23.56
   3   3 -24   35.70   36.32
  -3  -3 -24   28.33   26.71
   3  -3  24   69.75   17.45
  -3  -3  25   12.92    5.10
   3  -3 -25   14.31   19.12
  -3   3 -25   37.26   16.26
  -3  -3 -25   14.43   20.35
  -3  -3 -25   36.35   30.72
   3   3 -25   13.94   15.01
  -3   3 -26    7.53   11.54
   3  -3 -26   28.48   19.59
  -3   3 -26   11.00    8.31
  -3  -3 -26   11.25   13.92
  -3  -3 -26   23.62   11.89
   3   3 -26    7.56   17.24
   3  -3 -27   21.78   22.28
  -3   3 -27   29.88   22.74
  -3   3 -27   28.47   21.58
  -3  -3 -27   16.05   18.07
   3   3 -27   28.35   34.22
  -3  -3 -27   33.57   22.51
  -3   3 -28   12.61   10.41
  -3   3 -28   31.69   22.33
   3  -3 -28   10.66   17.13
   3   3 -28   12.30   14.36
  -3  -3 -28    3.83    6.70
   3  -4   0    6.61    3.39
  -3   4   0    1.83    2.89
  -3  -4   0   10.86    7.52
   3   4   0    2.78   10.14
   3  -4   0   18.30   10.28
  -3  -4   0    0.85    2.37
  -3   4   0    6.09    5.21
   3   4   0    5.17    4.46
  -3   4  -1  417.99   29.16
   3  -4  -1  480.88   22.28
  -3   4  -1  506.60   25.61
   3   4   1  524.27   27.70
  -3  -4   1  499.41   25.73
   3  -4  -1  384.79   23.51
   3   4   1  454.41   21.68
   3  -4   1  476.09   24.44
   3   4  -1  537.00   28.01
  -3   4   1  527.64   24.35
  -3  -4  -1  527.25   27.86
  -3   4   1  381.71   28.68
  -3  -4  -1  399.62   19.26
   3  -4   1  393.93   23.89
   3   4  -1  420.09   20.19
  -3   4  -2  200.26   14.73
   3  -4  -2  175.98    8.00
  -3  -4   2  221.73   20.02
   3  -4  -2  175.30   17.00
   3   4   2  179.46   23.88
  -3   4  -2  134.55   11.43
   3   4   2  161.31   12.92
   3  -4   2  202.62   15.52
  -3   4   2  217.46    8.58
  -3  -4  -2  206.89   26.04
   3   4  -2  145.44    9.96
   3   4  -2  233.65   17.82
  -3   4   2  146.81   20.21
  -3  -4  -2  164.18   10.67
   3   4  -2  207.33   13.83
  -3   4  -3 1754.11   74.48
  -3   4  -3 1833.59   77.65
  -3  -4   3 1971.60   83.55
  -3   4  -3 1752.39   74.40
   3   4   3 1865.14   76.90
   3   4   3 1783.04   75.99
   3  -4  -3 1545.53   67.47
  -3  -4   3 1768.61   73.58
   3   4  -3 2087.10   87.45
  -3   4   3 1696.22   72.03
  -3  -4  -3 1608.60   67.46
   3   4  -3 1880.08   78.78
   3  -4   3 1556.33   67.25
  -3  -4  -3 1870.67   79.75
  -3   4  -4 2031.32  181.68
  -3  -4   4 2303.77   96.02
   3   4   4 2230.94   91.63
   3   4   4 2040.56   86.21
   3  -4  -4 1744.81   75.41
  -3   4  -4 2061.24   87.55
  -3  -4   4 2146.40   89.24
   3  -4   4 1758.67   75.74
  -3  -4  -4 2071.52   88.18
  -3   4   4 1995.51   84.65
   3   4  -4 2116.89   87.54
  -3  -4  -4 1829.72   76.43
   3   4  -4 2366.44   98.53
   3  -4   4 2060.83   87.27
  -3   4  -5 2558.77  106.73
   3  -4  -5 2094.59   88.67
   3   4   5 2650.70  108.87
  -3  -4   5 2620.25  108.35
   3   4   5 2401.64  100.62
  -3   4  -5 2339.23  100.03
  -3  -4   5 2533.70  104.11
  -3  -4  -5 2423.43  101.92
   3  -4   5 2154.62   91.89
  -3   4   5 2462.60  102.98
   3   4  -5 2603.13  107.62
   3   4  -5 2894.87  120.17
  -3  -4  -5 2340.91   97.31
   3  -4   5 2579.49  107.87
  -3  -4   6 4473.83  183.60
  -3   4  -6 4062.98  168.43
   3   4   6 4527.51  186.75
  -3  -4   6 4482.63  185.66
   3   4   6 3962.87  164.39
   3  -4  -6 3553.55  148.15
  -3   4  -6 4313.82  178.78
  -3  -4  -6 4026.34  167.04
  -3   4   6 4233.89  175.22
  -3  -4  -6 3791.73  157.25
   3  -4   6 4368.17  180.89
   3   4  -6 4797.26  197.10
   3  -4   6 3493.76  147.01
  -3  -4   7 4235.14  175.42
   3   4   7 4560.22  188.24
   3   4   7 3794.23  157.90
   3  -4  -7 3508.55  147.52
  -3   4  -7 4183.61  174.01
  -3  -4   7 4538.36  186.66
  -3  -4  -7 3930.17  164.04
  -3   4   7 4222.09  175.87
  -3  -4  -7 3770.39  156.96
   3   4  -7 4366.61  180.51
   3   4  -7 4771.41  196.24
   3  -4   7 4259.75  177.11
   3   4   8 3881.02  161.85
  -3  -4   8 3396.88  143.12
  -3  -4   8 3669.44  153.14
   3  -4  -8 3169.35  134.72
  -3   4  -8 3601.95  151.64
   3   4  -8 4174.07  173.10
  -3  -4  -8 3317.65  139.90
   3  -4   8 2960.70  126.89
   3   4  -8 3660.67  154.93
  -3  -4  -8 3163.40  134.64
  -3  -4   9 3607.46  151.66
   3  -4  -9 3354.04  143.28
  -3   4  -9 3836.66  162.62
   3  -4   9 3097.31  134.90
   3   4  -9 4235.03  176.23
  -3  -4  -9 3198.98  136.28
  -3  -4  -9 3292.35  140.97
   3   4  -9 3509.28  148.66
  -3  -4  10 2390.05  103.71
   3  -4 -10 2289.50  101.29
  -3  -4 -10 2127.00   94.14
   3  -4 -11    6.57   13.32
   3  -4 -11   12.21    7.03
  -3  -4  11   11.24    6.71
   3  -4 -11    6.05    4.69
  -3   4 -11    5.78    6.13
  -3  -4 -11    8.57    6.86
   3  -4  11   25.85   11.97
   3   4 -11    9.32   11.82
  -3  -4 -11   15.09    9.55
   3  -4 -12   23.08   17.63
   3  -4 -12   19.66    4.93
  -3  -4  12   30.35   11.89
   3  -4 -12   12.33    5.56
  -3   4 -12   24.15   14.61
  -3  -4 -12   25.30   15.82
   3  -4  12   32.97   16.34
   3   4 -12   24.79   15.88
  -3  -4 -12   40.41   24.97
  -3   4 -13 2102.89   68.83
  -3  -4  13 1839.66   55.13
   3  -4 -13 1912.36   62.09
  -3  -4 -13 1807.72   58.02
  -3  -4 -13 1824.09   58.97
   3   4 -13 2101.39   66.16
   3  -4  13 1740.37   57.70
   3  -4 -14  257.28   29.33
  -3  -4  14  255.30   24.98
   3  -4 -14  290.95   16.94
   3  -4 -14  182.97   24.36
  -3   4 -14  296.00   32.93
  -3  -4 -14  219.93   25.32
  -3  -4 -14  241.36   80.34
   3  -4  14  229.08   23.56
   3   4 -14  298.30   30.94
   3  -4 -15  428.95   32.53
  -3  -4  15  636.63   46.38
   3  -4 -15  640.72   40.53
   3  -4 -15  420.43   39.83
  -3   4 -15  471.19   43.17
   3  -4  15  440.28   43.26
  -3  -4 -15  485.65   46.23
  -3  -4 -15  602.36   46.70
   3   4 -15  538.52   48.46
  -3  -4  16   28.81   13.94
   3  -4 -16   22.98    4.90
   3  -4 -16   17.96   13.91
   3  -4 -16   24.70   18.08
  -3   4 -16   32.99   22.92
   3  -4  16   20.84   15.51
  -3  -4 -16   11.37   18.34
  -3  -4 -16   15.45   13.77
   3   4 -16   32.73   13.49
   3  -4 -17  211.24   26.43
  -3  -4  17  166.70   24.38
   3  -4 -17  240.10   15.93
   3  -4 -17  200.61   61.35
  -3   4 -17  189.99   27.09
  -3  -4 -17  109.74   48.12
   3  -4  17  237.93   21.35
   3   4 -17  267.77   29.48
  -3  -4 -17  258.01   24.41
  -3   4 -18 1518.79   72.03
  -3  -4  18 1231.80   56.06
   3  -4 -18 1083.94   43.28
   3  -4 -18 1351.14   67.75
  -3  -4 -18 1184.57   56.05
  -3  -4 -18 1514.21   70.36
   3  -4  18 1232.36   60.93
   3   4 -18 1447.36   70.27
  -3   4 -19  456.50   42.55
  -3  -4  19  337.01   29.35
   3  -4 -19  376.28   44.25
   3  -4 -19  521.90   45.41
  -3  -4 -19  399.10   36.40
  -3  -4 -19  431.19   35.51
   3  -4  19  354.97   30.99
   3   4 -19  417.12   37.90
  -3  -4  20  838.40   45.76
   3  -4 -20  819.08   37.66
   3  -4 -20 1085.09   57.80
  -3   4 -20 1033.25   61.95
   3  -4  20  888.79   49.58
  -3  -4 -20  942.82   47.23
  -3  -4 -20  970.34   52.15
   3   4 -20 1017.21   54.30
  -3  -4  21  239.07   24.82
  -3   4 -21  286.21   38.90
   3  -4 -21  227.58   20.38
   3  -4 -21  251.86   40.95
  -3  -4 -21  225.58   28.69
  -3  -4 -21  241.11   34.90
   3   4 -21  340.23   45.15
   3  -4  21  224.82   26.49
  -3  -4  22    8.46    6.51
   3  -4 -22   17.66   20.40
   3  -4 -22    8.96    8.19
  -3   4 -22   21.94   13.83
   3  -4  22   20.68   11.38
  -3  -4 -22    9.57   19.50
  -3  -4 -22   18.01   23.72
   3   4 -22   19.61   15.00
   3  -4 -23   48.66   26.65
  -3  -4  23   17.08    6.09
  -3   4 -23   41.88   36.72
   3  -4  23   31.55   10.14
  -3  -4 -23   17.22   20.65
  -3  -4 -23   40.71   20.49
   3   4 -23   28.95   23.33
  -3  -4  24  207.49   23.41
  -3   4 -24  283.52   43.35
   3  -4 -24  343.09   45.46
   3  -4  24  242.85   32.90
  -3  -4 -24  228.63   88.29
  -3  -4 -24  278.42   39.89
  -3   4 -25  423.34   56.85
  -3  -4  25  303.90   33.51
   3  -4 -25  358.25   50.84
  -3  -4 -25  300.36   43.22
   3   4 -25  373.67   58.83
  -3  -4 -25  329.28   45.65
   3  -4  25  240.72   30.74
  -3  -4  26  205.39   22.17
   3  -4 -26  246.62   32.29
  -3   4 -26  286.08   37.50
   3  -4  26  200.20   28.87
   3   4 -26  215.14   39.27
  -3  -4 -26  205.41   39.04
  -3  -4 -26  186.50   39.81
   3  -4 -27  166.97   28.80
  -3   4 -27  137.82   31.93
   3   4 -27  167.84   36.26
  -3  -4 -27  145.84   31.40
  -3  -4 -27  152.15   50.52
   3  -5   0   13.19    9.58
  -3   5   0    6.63    7.20
  -3  -5   0    8.27   15.14
   3   5   0   17.01    9.23
  -3  -5   0    1.56    3.05
   3  -5   0    7.98    8.03
  -3   5   0    1.62    4.52
   3   5   0    7.20    5.22
   3  -5  -1   15.96    6.33
   3   5   1   18.17    9.80
  -3   5  -1    7.97   10.52
  -3   5  -1   13.00    6.92
  -3  -5   1   72.48   32.98
   3  -5  -1    9.61    8.71
  -3  -5   1    7.52    6.08
   3   5   1    8.15    6.18
   3  -5   1   19.87   14.92
   3  -5   1   10.25   12.78
  -3   5   1    5.63    9.29
   3   5  -1   14.55   25.27
  -3  -5  -1   14.55    7.97
  -3  -5  -1    8.33    7.18
  -3   5   1    8.54   10.04
   3   5  -1    5.86    2.82
   3  -5  -2  930.09   45.16
   3  -5  -2 1091.41   17.77
  -3   5  -2 1170.89   52.23
  -3  -5   2 1224.80   55.94
  -3   5  -2  988.65   45.21
   3   5   2 1164.21   53.12
   3   5   2 1063.22   46.64
  -3   5   2 1259.25   52.88
   3   5  -2 1273.33   56.93
   3   5  -2 1020.40   44.41
   3  -5   2  979.89   48.14
  -3  -5  -2 1175.41   29.81
   3  -5   2 1035.94   48.00
  -3   5   2  972.21   44.71
  -3  -5  -2  915.06   41.00
   3   5  -2 1011.43   21.84
  -3   5  -3    9.05   10.76
   3  -5  -3    8.14    5.78
  -3   5  -3    5.73    4.26
   3  -5  -3    7.69    5.43
  -3  -5   3   14.95   10.95
  -3   5  -3   13.75    9.76
   3   5  -3    3.35    4.42
  -3  -5  -3    5.38    6.73
   3   5  -3   13.44    3.50
  -3   5   3   10.76    3.88
  -3   5   3    6.38    6.77
  -3  -5  -3   12.33    7.51
   3  -5   3   13.35    5.12
   3   5   4   80.14   11.31
  -3   5  -4  100.87   11.72
   3  -5  -4   88.00    6.03
  -3  -5   4   89.33   15.36
  -3   5  -4   69.00   12.99
  -3   5  -4   84.62   11.62
   3   5   4   82.94   10.36
   3  -5  -4   31.08   19.97
  -3  -5   4   88.36   10.17
  -3   5   4   88.48    6.02
   3   5  -4  120.48   52.33
  -3  -5  -4   96.81   14.24
  -3   5   4   87.43   11.54
  -3  -5  -4   80.17   12.61
   3   5  -4  106.35   13.15
   3  -5   4   98.58   14.67
  -3   5  -5   12.33    4.99
  -3  -5   5    5.56    4.64
   3  -5  -5   14.09    9.46
  -3   5  -5   12.84    9.58
   3   5   5    2.96    4.05
  -3   5   5    3.03    3.12
  -3  -5  -5    6.90    7.09
  -3   5   5    7.75    9.55
   3   5  -5    8.14    7.73
   3   5  -5    0.98    3.25
  -3  -5  -5    3.21    2.94
   3  -5   5   10.51    9.64
  -3  -5   6   48.43    7.40
   3  -5  -6   24.91   11.70
  -3  -5   6   80.61   17.91
   3   5   6   57.32   10.46
  -3   5  -6   59.75   14.19
   3   5   6   58.83   10.31
  -3  -5  -6   81.61   17.47
  -3  -5  -6   54.97    9.87
   3   5  -6   90.61   18.33
  -3   5   6   52.09    9.84
   3   5  -6   34.97   14.35
  -3   5   6   46.85    4.60
   3  -5   6   53.35   23.22
   3  -5   6   17.74   19.77
   3  -5  -7  131.33   20.70
  -3  -5   7  140.64   21.14
  -3   5  -7   99.09   13.82
   3   5   7   91.95   13.85
   3   5   7  113.72   12.01
  -3  -5   7   96.20   12.30
   3   5  -7  149.79   13.37
  -3  -5  -7   97.17   15.61
   3  -5   7  115.70   18.72
   3   5  -7  107.55   24.12
  -3  -5  -7  110.89   16.42
   3  -5  -8  515.17   25.59
  -3   5  -8  680.51   46.18
  -3  -5   8  747.53   43.89
   3  -5  -8  514.12   34.32
  -3  -5   8  747.64   43.26
  -3  -5  -8  568.54   37.37
   3   5  -8  702.82   42.40
   3  -5   8  520.38   34.14
  -3  -5  -8  602.12   37.25
   3  -5  -9   42.60    7.59
   3  -5  -9   32.61    8.43
  -3  -5   9   40.86    9.18
  -3   5  -9   28.87   17.86
   3  -5   9   31.76   19.67
  -3  -5  -9   23.48   14.02
  -3  -5  -9   41.23   14.20
   3   5  -9   29.37   24.56
   3  -5 -10  115.64    7.53
  -3   5 -10  159.71   17.93
  -3  -5  10  160.51   18.68
   3  -5 -10  126.46    8.74
   3  -5 -10   86.87   16.38
  -3  -5 -10  119.98   15.85
  -3  -5 -10  140.54   15.80
   3  -5  10   98.98   21.57
   3   5 -10  116.65   17.71
   3  -5 -11   63.49    4.96
  -3   5 -11   56.71   14.10
  -3  -5  11   71.93   16.40
   3  -5 -11   51.40    5.61
   3  -5 -11   39.39   22.73
  -3  -5 -11   48.58   17.39
  -3  -5 -11   74.08   19.20
   3  -5  11   79.42   13.72
   3   5 -11   35.86   39.75
  -3  -5  12  238.46   31.83
   3  -5 -12  214.39   14.17
   3  -5 -12  206.59   35.94
  -3   5 -12  217.22   24.52
   3  -5  12  162.08   20.02
  -3  -5 -12  202.96   20.47
  -3  -5 -12  238.85   22.36
   3   5 -12  215.86   25.33
   3  -5 -13   14.61   13.35
   3  -5 -13    7.81    4.93
  -3  -5  13    6.91    8.32
   3  -5 -13    3.90    3.09
  -3   5 -13   15.51   10.98
  -3  -5 -13    3.51    5.08
   3  -5  13   10.93   10.69
   3   5 -13   17.45   13.56
  -3  -5 -13    7.42    6.42
   3  -5 -14   33.92   24.39
  -3  -5  14   47.47   13.43
   3  -5 -14   65.08    8.70
   3  -5 -14   59.29    8.62
  -3   5 -14  109.31   18.77
  -3  -5 -14   67.29   30.32
   3  -5  14   61.67   16.41
   3   5 -14   60.33   43.34
  -3  -5 -14   59.28   20.44
   3  -5 -15   11.09   10.46
   3  -5 -15    4.37    5.55
  -3  -5  15   13.15    9.73
   3  -5 -15   13.08    8.91
  -3   5 -15    5.85    5.13
  -3  -5 -15   11.70   13.53
   3  -5  15   19.03   11.23
   3   5 -15   40.71   18.48
  -3  -5 -15   14.81   10.22
   3  -5 -16   20.74    7.31
  -3  -5  16   40.75   14.43
   3  -5 -16   14.72    9.17
   3  -5 -16   33.14   18.30
  -3   5 -16   39.20   26.65
  -3  -5 -16   17.87   10.64
  -3  -5 -16   21.23   15.17
   3   5 -16   28.45   20.31
  -3  -5  17   27.60   10.75
   3  -5 -17   25.79    9.91
   3  -5 -17   15.23    8.71
   3  -5 -17   28.56   27.37
  -3   5 -17   17.45   16.47
   3  -5  17   24.38   15.28
  -3  -5 -17   23.86   16.22
  -3  -5 -17   13.33    9.40
   3   5 -17   51.11   23.27
  -3   5 -18   33.42   23.13
  -3  -5  18   33.03   14.89
   3  -5 -18    9.49    9.57
   3  -5 -18   23.06   11.54
  -3  -5 -18    4.25    5.55
  -3  -5 -18   22.66   23.42
   3  -5  18   23.53   11.48
   3   5 -18   11.31   11.77
  -3   5 -19    9.35    9.96
  -3  -5  19   12.58    6.95
   3  -5 -19    8.49    6.02
   3  -5 -19   11.86   13.08
  -3  -5 -19   12.27   13.68
  -3  -5 -19   17.67   16.07
   3  -5  19   28.92   12.21
   3  -5 -20   11.59    8.13
  -3  -5  20   10.11   10.11
   3  -5 -20   10.36   10.92
  -3   5 -20   14.76   18.18
   3  -5  20   23.77   12.07
  -3  -5 -20    9.81   14.69
   3   5 -20    3.63   11.42
  -3  -5 -20   37.66   20.40
  -3  -5  21   21.84   13.88
   3  -5 -21   13.20    7.94
   3  -5 -21    5.05    8.77
  -3   5 -21   25.29   14.17
   3  -5  21   22.20    9.17
  -3  -5 -21   12.76    9.11
  -3  -5 -21    6.34    8.22
   3   5 -21   30.53   14.98
   3  -5 -22   29.73   16.21
  -3  -5  22   14.41    6.35
  -3   5 -22   17.10   13.28
   3  -5  22   39.77   14.97
  -3  -5 -22   17.25   22.96
  -3  -5 -22   23.52   19.00
   3   5 -22   23.80   30.67
   3  -5 -23   23.25    9.54
  -3  -5  23   32.58   13.85
  -3   5 -23   17.02   20.96
   3  -5  23   34.15   16.42
  -3  -5 -23   24.59   20.68
  -3  -5 -23   16.17   13.82
   3   5 -23   25.67   16.05
  -3  -5  24   29.52   14.73
[truncated: 1,069,683 more chars]
