# Supplementary material
Source: MDPI journal article supplement (https://www.mdpi.com/2304-6740/9/10/76)
Supplement: s1 [file s1 › CIF_3.cif]

data_global
_audit_creation_date                               2020-07-08
_audit_creation_method                            'by CrystalStructure 4.3'
_audit_update_record                               ?

#==============================================================================
# PROCESSING SUMMARY (IUCr Office Use Only)

_journal_date_recd_electronic                      ?
_journal_date_from_coeditor                        ?
_journal_date_accepted                             ?
_journal_coeditor_code                             ?

#==============================================================================
# SUBMISSION DETAILS

_publ_contact_author_name                         'ENTER NAME'
_publ_contact_author_email                        'ENTER EMAIL ADDRESS'
_publ_contact_author_fax                          'ENTER FAX NUMBER'
_publ_contact_author_phone                        'ENTER PHONE NUMBER'
_publ_contact_letter
;
    ENTER TEXT OF LETTER
;
_publ_requested_journal                           'ENTER JOURNAL NAME HERE'
_publ_requested_category
                                               'CHOOSE FI FM FO CI CM CO or AD'
_publ_requested_coeditor_name                      ?

#==============================================================================
# TITLE AND AUTHOR LIST

_publ_section_title
;
    ENTER SECTION TITLE
;
_publ_section_title_footnote
;
    ENTER FOOTNOTE TO TITLE OF PAPER
;
loop_
_publ_author_name
_publ_author_footnote
_publ_author_address
' FIRST AUTHORS NAME '
;
  FIRST AUTHORS FOOTNOTES
;
;
  FIRST AUTHORS ADDRESS
;
_publ_section_synopsis
;
    ENTER SYNOPSIS
;

#==============================================================================
# TEXT

_publ_section_abstract
;
    ENTER ABSTRACT
;
_publ_section_comment
;
    ENTER TEXT
;
_publ_section_references
;
    ENTER OTHER REFERENCES

    Rigaku (2018). CrystalStructure. Version 4.3. 
    Rigaku Corporation, Tokyo, Japan.

    Sheldrick, G. M. (2014). Acta Cryst. (2014). A70, C1437.
    SHELXT Version 2014/5

    Sheldrick, G.M. (2008) SHELXL Version 2014/7, Acta Cryst. A64, 112-122.

    Rigaku (1998). REQAB. 
    Rigaku Corporation, Tokyo, Japan.

;
_publ_section_figure_captions
;
    ENTER FIGURE CAPTIONS
;
_publ_section_exptl_prep
;
    ENTER COMPOUND PREPARATION DETAILS
;
_publ_section_exptl_refinement
;
    ENTER SPECIAL DETAILS OF THE REFINEMENT
;

#==============================================================================
data_PdtmedaCF3NN

#==============================================================================
# CHEMICAL DATA

_chemical_formula_sum                             'C10 H16 F6 N4 O2 Pd'
_chemical_formula_moiety                          'C10 H16 F6 N4 O2 Pd'
_chemical_formula_weight                           444.65
_chemical_melting_point                            ?

#==============================================================================
# CRYSTAL DATA
_space_group_crystal_system                        monoclinic
_space_group_name_H-M_alt                         'P 1 21/n 1'
_space_group_name_Hall                            '-P 2yn'
_space_group_IT_number                             14
loop_
_space_group_symop_id
_space_group_symop_operation_xyz
1   '+X,+Y,+Z'
2   '1/2-X,1/2+Y,1/2-Z'
3   '-X,-Y,-Z'
4   '-1/2+X,-1/2-Y,-1/2+Z'
#------------------------------------------------------------------------------
_cell_length_a                                     13.0204(19)
_cell_length_b                                     8.1491(10)
_cell_length_c                                     15.1590(19)
_cell_angle_alpha                                  90.0000
_cell_angle_beta                                   91.198(8)
_cell_angle_gamma                                  90.0000
_cell_volume                                       1608.1(4)
_cell_formula_units_Z                              4
_cell_measurement_reflns_used                      5265
_cell_measurement_theta_min                        3.08
_cell_measurement_theta_max                        27.48
_cell_measurement_temperature                      193
#------------------------------------------------------------------------------
_exptl_crystal_description                         prism
_exptl_crystal_colour                              orange
_exptl_crystal_size_max                            0.200
_exptl_crystal_size_mid                            0.200
_exptl_crystal_size_min                            0.200
_exptl_crystal_density_diffrn                      1.836
_exptl_crystal_density_meas                        ?
_exptl_crystal_density_method                     'not measured'
_exptl_crystal_F_000                               880.00
_exptl_absorpt_coefficient_mu                      1.229
_exptl_absorpt_correction_type                     multi-scan
_exptl_absorpt_process_details                    'REQAB (Rigaku, 1998)'
_exptl_absorpt_correction_T_min                    0.674
_exptl_absorpt_correction_T_max                    0.782

#==============================================================================
# EXPERIMENTAL DATA

_diffrn_ambient_temperature                        193
_diffrn_radiation_type                            'Mo K\a'
_diffrn_radiation_wavelength                       0.71075
_diffrn_measurement_device_type                   'Rigaku Saturn70'
_diffrn_measurement_method                         \w
_diffrn_detector_area_resol_mean                   7.314
_diffrn_reflns_number                              12071
_diffrn_reflns_av_unetI/netI                       0.0812
_diffrn_reflns_av_R_equivalents                    0.1128
_diffrn_reflns_theta_max                           27.472
_diffrn_reflns_theta_min                           3.228
_diffrn_reflns_theta_full                          25.242
_diffrn_measured_fraction_theta_max                0.989
_diffrn_measured_fraction_theta_full               0.987
_diffrn_reflns_Laue_measured_fraction_max          0.989
_diffrn_reflns_Laue_measured_fraction_full         0.987
_diffrn_reflns_point_group_measured_fraction_max   0.989
_diffrn_reflns_point_group_measured_fraction_full  0.987
_diffrn_reflns_limit_h_min                        -16
_diffrn_reflns_limit_h_max                         16
_diffrn_reflns_limit_k_min                        -10
_diffrn_reflns_limit_k_max                         9
_diffrn_reflns_limit_l_min                        -19
_diffrn_reflns_limit_l_max                         19
_diffrn_standards_number                           0
_diffrn_standards_interval_count                   .
_diffrn_standards_decay_%                          ?
_reflns_number_total                               3647
_reflns_number_gt                                  3299
_reflns_threshold_expression                       F^2^>2.0\s(F^2^)
_reflns_Friedel_coverage          0.000
_reflns_Friedel_fraction_max      .
_reflns_Friedel_fraction_full     .

#==============================================================================
# REFINEMENT DATA

_refine_special_details
;
    Refinement was performed using all reflections. The weighted 
    R-factor (wR) and goodness of fit (S) are based on F^2^.
    R-factor (gt) are based on F. The threshold expression of
    F^2^ > 2.0 sigma(F^2^) is used only for calculating R-factor (gt).
;
_refine_ls_structure_factor_coef                   Fsqd
_refine_ls_R_factor_all                            0.0475
_refine_ls_R_factor_gt                             0.0417
_refine_ls_wR_factor_ref                           0.1130
_refine_ls_wR_factor_gt                            0.1082
_refine_ls_number_restraints                       0
_refine_ls_hydrogen_treatment                      constr
_refine_ls_number_reflns                           3647
_refine_ls_number_parameters                       208
_refine_ls_goodness_of_fit_ref                     1.146
_refine_ls_weighting_scheme                        calc
_refine_ls_weighting_details
           'w = 1/[\s^2^(Fo^2^)+(0.0337P)^2^+1.0748P] where P=(Fo^2^+2Fc^2^)/3'
_atom_sites_solution_hydrogens                     geom
_atom_sites_solution_primary                       direct
_atom_sites_solution_secondary                     difmap
_refine_ls_shift/su_max                            0.000
_refine_diff_density_max                           1.13
_refine_diff_density_min                          -0.97
_refine_ls_extinction_method                       none
_refine_ls_extinction_coef                         ?

loop_
_atom_type_symbol
_atom_type_description
_atom_type_scat_dispersion_real
_atom_type_scat_dispersion_imag
_atom_type_scat_source
  'C' 'C'  0.0033 0.0016 
;
International Tables for Crystallography
(Vol. C, Tables 4.2.6.8 and 6.1.1.4)
;
  'H' 'H'  0.0000 0.0000 
;
International Tables for Crystallography
(Vol. C, Table 6.1.1.4)
;
  'F' 'F'  0.0171 0.0103 
;
International Tables for Crystallography
(Vol. C, Tables 4.2.6.8 and 6.1.1.4)
;
  'N' 'N'  0.0061 0.0033 
;
International Tables for Crystallography
(Vol. C, Tables 4.2.6.8 and 6.1.1.4)
;
  'O' 'O'  0.0106 0.0060 
;
International Tables for Crystallography
(Vol. C, Tables 4.2.6.8 and 6.1.1.4)
;
  'Pd' 'Pd'  -0.9988 1.0072 
;
International Tables for Crystallography
(Vol. C, Tables 4.2.6.8 and 6.1.1.4)
;

#==============================================================================
# ATOMIC COORDINATES AND THERMAL PARAMETERS

loop_
 _atom_site_label
 _atom_site_type_symbol
 _atom_site_fract_x
 _atom_site_fract_y
 _atom_site_fract_z
 _atom_site_U_iso_or_equiv
 _atom_site_adp_type
 _atom_site_occupancy
 _atom_site_site_symmetry_order  
 _atom_site_calc_flag
 _atom_site_refinement_flags_posn
 _atom_site_refinement_flags_adp
 _atom_site_refinement_flags_occupancy
 _atom_site_disorder_assembly
 _atom_site_disorder_group
Pd1 Pd 0.64124(2) 0.44056(3) 0.38480(2) 0.02371(12) Uani 1 1 d . . . . .
F1 F 0.4543(3) -0.0251(4) 0.3152(4) 0.1019(15) Uani 1 1 d . . . . .
F2 F 0.3434(3) 0.1220(5) 0.2487(2) 0.0962(14) Uani 1 1 d . . . . .
F3 F 0.3463(2) 0.1115(4) 0.38783(19) 0.0694(9) Uani 1 1 d . . . . .
F4 F 0.4754(3) 0.4608(5) 0.08958(18) 0.0822(12) Uani 1 1 d . . . . .
F5 F 0.3742(2) 0.6018(5) 0.1708(3) 0.0896(12) Uani 1 1 d . . . . .
F6 F 0.4802(3) 0.7233(5) 0.0874(2) 0.0925(12) Uani 1 1 d . . . . .
O1 O 0.5398(2) 0.2577(3) 0.39358(17) 0.0387(6) Uani 1 1 d . . . . .
O2 O 0.6116(3) 0.7180(4) 0.2099(2) 0.0586(9) Uani 1 1 d . . . . .
N1 N 0.4774(2) 0.3637(4) 0.2603(2) 0.0353(7) Uani 1 1 d . . . . .
N2 N 0.5550(2) 0.4837(4) 0.27379(18) 0.0292(6) Uani 1 1 d . . . . .
N3 N 0.7565(3) 0.6132(4) 0.3816(2) 0.0391(8) Uani 1 1 d . . . . .
N4 N 0.7089(3) 0.3688(4) 0.50246(19) 0.0338(7) Uani 1 1 d . . . . .
C1 C 0.4053(4) 0.1183(6) 0.3177(3) 0.0470(11) Uani 1 1 d . . . . .
C2 C 0.4798(3) 0.2598(5) 0.3244(2) 0.0333(8) Uani 1 1 d . . . . .
C3 C 0.5524(3) 0.6013(5) 0.2137(2) 0.0351(8) Uani 1 1 d . . . . .
C4 C 0.4688(4) 0.5954(7) 0.1413(3) 0.0564(13) Uani 1 1 d . . . . .
C5 C 0.8308(6) 0.5600(9) 0.4523(5) 0.106(3) Uani 1 1 d . . . . .
H1 H 0.8789 0.4802 0.4263 0.127 Uiso 1 1 calc R U . . .
H2 H 0.8717 0.6569 0.4710 0.127 Uiso 1 1 calc R U . . .
C6 C 0.7911(5) 0.4916(9) 0.5249(4) 0.0753(19) Uani 1 1 d . . . . .
H3 H 0.7620 0.5789 0.5623 0.090 Uiso 1 1 calc R U . . .
H4 H 0.8467 0.4367 0.5593 0.090 Uiso 1 1 calc R U . . .
C7 C 0.7180(5) 0.7792(5) 0.3969(3) 0.0635(16) Uani 1 1 d . . . . .
H5 H 0.6792 0.7810 0.4516 0.076 Uiso 1 1 calc R U . . .
H6 H 0.7760 0.8555 0.4020 0.076 Uiso 1 1 calc R U . . .
H7 H 0.6731 0.8122 0.3474 0.076 Uiso 1 1 calc R U . . .
C8 C 0.8146(4) 0.6131(5) 0.2991(3) 0.0523(12) Uani 1 1 d . . . . .
H8 H 0.8409 0.5025 0.2880 0.063 Uiso 1 1 calc R U . . .
H9 H 0.7693 0.6467 0.2499 0.063 Uiso 1 1 calc R U . . .
H10 H 0.8722 0.6900 0.3046 0.063 Uiso 1 1 calc R U . . .
C9 C 0.6324(4) 0.3717(6) 0.5742(3) 0.0543(12) Uani 1 1 d . . . . .
H11 H 0.6053 0.4832 0.5805 0.065 Uiso 1 1 calc R U . . .
H12 H 0.5759 0.2964 0.5595 0.065 Uiso 1 1 calc R U . . .
H13 H 0.6656 0.3375 0.6298 0.065 Uiso 1 1 calc R U . . .
C10 C 0.7482(4) 0.1997(6) 0.4946(3) 0.0594(13) Uani 1 1 d . . . . .
H14 H 0.7987 0.1951 0.4476 0.071 Uiso 1 1 calc R U . . .
H15 H 0.7808 0.1664 0.5506 0.071 Uiso 1 1 calc R U . . .
H16 H 0.6911 0.1253 0.4803 0.071 Uiso 1 1 calc R U . . .

loop_
 _atom_site_aniso_label
 _atom_site_aniso_U_11
 _atom_site_aniso_U_22
 _atom_site_aniso_U_33
 _atom_site_aniso_U_23
 _atom_site_aniso_U_13
 _atom_site_aniso_U_12
Pd1 0.02404(19) 0.02444(18) 0.02264(16) -0.00103(9) 0.00032(10) -0.00067(9)
F1 0.080(3) 0.0450(17) 0.181(4) -0.026(2) 0.031(3) -0.0191(18)
F2 0.103(3) 0.131(3) 0.0539(17) 0.011(2) -0.0237(17) -0.083(3)
F3 0.0581(19) 0.097(2) 0.0545(16) -0.0066(16) 0.0213(14) -0.0395(18)
F4 0.098(3) 0.120(3) 0.0281(14) 0.0013(16) -0.0095(15) -0.039(2)
F5 0.0275(16) 0.140(3) 0.101(3) 0.049(2) -0.0104(16) 0.0055(18)
F6 0.076(2) 0.124(3) 0.076(2) 0.065(2) -0.0321(17) -0.016(2)
O1 0.0358(16) 0.0425(15) 0.0378(14) 0.0062(12) -0.0010(12) -0.0118(12)
O2 0.060(2) 0.0530(19) 0.062(2) 0.0274(16) -0.0199(16) -0.0179(17)
N1 0.0291(17) 0.0456(19) 0.0312(15) -0.0034(14) 0.0029(12) -0.0097(15)
N2 0.0277(17) 0.0334(15) 0.0264(14) 0.0014(13) -0.0017(12) -0.0035(13)
N3 0.047(2) 0.0333(16) 0.0361(17) 0.0048(15) -0.0146(14) -0.0132(16)
N4 0.0356(18) 0.0362(17) 0.0293(15) 0.0072(13) -0.0036(12) 0.0005(14)
C1 0.044(3) 0.053(3) 0.043(2) -0.005(2) 0.0083(19) -0.018(2)
C2 0.029(2) 0.041(2) 0.0304(18) -0.0082(16) 0.0087(15) -0.0044(16)
C3 0.033(2) 0.042(2) 0.0304(18) 0.0037(17) -0.0022(15) 0.0080(18)
C4 0.041(3) 0.081(3) 0.047(3) 0.027(3) -0.009(2) -0.006(2)
C5 0.106(6) 0.113(5) 0.095(5) 0.061(4) -0.073(4) -0.075(4)
C6 0.074(4) 0.093(4) 0.057(3) 0.023(3) -0.038(3) -0.035(4)
C7 0.098(5) 0.036(2) 0.057(3) -0.018(2) 0.018(3) -0.020(3)
C8 0.038(2) 0.041(2) 0.078(3) 0.005(2) 0.015(2) -0.007(2)
C9 0.067(3) 0.069(3) 0.0276(19) 0.005(2) 0.0080(19) 0.009(3)
C10 0.063(3) 0.060(3) 0.056(3) 0.018(2) 0.004(2) 0.026(3)

#==============================================================================
_computing_data_collection
                                            'CrystalClear (Rigaku Corp., 2000)'
_computing_cell_refinement                         CrystalClear
_computing_data_reduction                          CrystalClear
_computing_structure_solution
                                      'SHELXT Version 2014/5 (Sheldrick, 2014)'
_computing_structure_refinement
                                      'SHELXL Version 2014/7 (Sheldrick, 2008)'
_computing_publication_material
                                          'CrystalStructure 4.3 (Rigaku, 2018)'
_computing_molecular_graphics                     'CrystalStructure 4.3'

#==============================================================================
# MOLECULAR GEOMETRY

_geom_special_details
;
 All esds (except the esd in the dihedral angle between two l.s. planes)
 are estimated using the full covariance matrix.  The cell esds are taken
 into account individually in the estimation of esds in distances, angles
 and torsion angles; correlations between esds in cell parameters are only
 used when they are defined by crystal symmetry.  An approximate (isotropic)
 treatment of cell esds is used for estimating esds involving l.s. planes.
;

loop_
 _geom_bond_atom_site_label_1
 _geom_bond_atom_site_label_2
 _geom_bond_distance
 _geom_bond_site_symmetry_2
 _geom_bond_publ_flag
Pd1 O1 1.997(3) . ?
Pd1 N2 2.034(3) . ?
Pd1 N4 2.058(3) . ?
Pd1 N3 2.059(3) . ?
F1 C1 1.332(6) . ?
F2 C1 1.308(6) . ?
F3 C1 1.326(5) . ?
F4 C4 1.352(7) . ?
F5 C4 1.320(6) . ?
F6 C4 1.335(5) . ?
O1 C2 1.295(5) . ?
O2 C3 1.227(5) . ?
N1 C2 1.289(5) . ?
N1 N2 1.418(4) . ?
N2 C3 1.322(5) . ?
N3 C7 1.462(6) . ?
N3 C8 1.475(6) . ?
N3 C5 1.493(6) . ?
N4 C10 1.476(5) . ?
N4 C9 1.491(5) . ?
N4 C6 1.500(6) . ?
C1 C2 1.509(6) . ?
C3 C4 1.530(6) . ?
C5 C6 1.346(8) . ?
C5 H1 0.9900 . ?
C5 H2 0.9900 . ?
C6 H3 0.9900 . ?
C6 H4 0.9900 . ?
C7 H5 0.9800 . ?
C7 H6 0.9800 . ?
C7 H7 0.9800 . ?
C8 H8 0.9800 . ?
C8 H9 0.9800 . ?
C8 H10 0.9800 . ?
C9 H11 0.9800 . ?
C9 H12 0.9800 . ?
C9 H13 0.9800 . ?
C10 H14 0.9800 . ?
C10 H15 0.9800 . ?
C10 H16 0.9800 . ?

loop_
 _geom_angle_atom_site_label_1
 _geom_angle_atom_site_label_2
 _geom_angle_atom_site_label_3
 _geom_angle
 _geom_angle_site_symmetry_1
 _geom_angle_site_symmetry_3
 _geom_angle_publ_flag
O1 Pd1 N2 80.21(12) . . ?
O1 Pd1 N4 90.11(12) . . ?
N2 Pd1 N4 170.15(12) . . ?
O1 Pd1 N3 174.20(13) . . ?
N2 Pd1 N3 104.61(12) . . ?
N4 Pd1 N3 85.16(13) . . ?
C2 O1 Pd1 109.0(2) . . ?
C2 N1 N2 109.8(3) . . ?
C3 N2 N1 113.1(3) . . ?
C3 N2 Pd1 134.6(3) . . ?
N1 N2 Pd1 112.3(2) . . ?
C7 N3 C8 108.6(3) . . ?
C7 N3 C5 111.9(5) . . ?
C8 N3 C5 105.8(5) . . ?
C7 N3 Pd1 112.1(3) . . ?
C8 N3 Pd1 114.0(3) . . ?
C5 N3 Pd1 104.3(3) . . ?
C10 N4 C9 108.2(3) . . ?
C10 N4 C6 113.2(5) . . ?
C9 N4 C6 108.0(4) . . ?
C10 N4 Pd1 109.8(3) . . ?
C9 N4 Pd1 110.3(3) . . ?
C6 N4 Pd1 107.3(3) . . ?
F2 C1 F3 106.5(4) . . ?
F2 C1 F1 106.6(5) . . ?
F3 C1 F1 105.8(4) . . ?
F2 C1 C2 114.9(4) . . ?
F3 C1 C2 111.1(3) . . ?
F1 C1 C2 111.3(4) . . ?
N1 C2 O1 128.6(4) . . ?
N1 C2 C1 116.5(4) . . ?
O1 C2 C1 114.9(3) . . ?
O2 C3 N2 125.9(4) . . ?
O2 C3 C4 115.5(4) . . ?
N2 C3 C4 118.6(4) . . ?
F5 C4 F6 107.0(4) . . ?
F5 C4 F4 107.5(5) . . ?
F6 C4 F4 105.6(4) . . ?
F5 C4 C3 114.2(4) . . ?
F6 C4 C3 109.1(4) . . ?
F4 C4 C3 112.9(4) . . ?
C6 C5 N3 116.9(6) . . ?
C6 C5 H1 108.1 . . ?
N3 C5 H1 108.1 . . ?
C6 C5 H2 108.1 . . ?
N3 C5 H2 108.1 . . ?
H1 C5 H2 107.3 . . ?
C5 C6 N4 112.1(4) . . ?
C5 C6 H3 109.2 . . ?
N4 C6 H3 109.2 . . ?
C5 C6 H4 109.2 . . ?
N4 C6 H4 109.2 . . ?
H3 C6 H4 107.9 . . ?
N3 C7 H5 109.5 . . ?
N3 C7 H6 109.5 . . ?
H5 C7 H6 109.5 . . ?
N3 C7 H7 109.5 . . ?
H5 C7 H7 109.5 . . ?
H6 C7 H7 109.5 . . ?
N3 C8 H8 109.5 . . ?
N3 C8 H9 109.5 . . ?
H8 C8 H9 109.5 . . ?
N3 C8 H10 109.5 . . ?
H8 C8 H10 109.5 . . ?
H9 C8 H10 109.5 . . ?
N4 C9 H11 109.5 . . ?
N4 C9 H12 109.5 . . ?
H11 C9 H12 109.5 . . ?
N4 C9 H13 109.5 . . ?
H11 C9 H13 109.5 . . ?
H12 C9 H13 109.5 . . ?
N4 C10 H14 109.5 . . ?
N4 C10 H15 109.5 . . ?
H14 C10 H15 109.5 . . ?
N4 C10 H16 109.5 . . ?
H14 C10 H16 109.5 . . ?
H15 C10 H16 109.5 . . ?

loop_
 _geom_torsion_atom_site_label_1
 _geom_torsion_atom_site_label_2
 _geom_torsion_atom_site_label_3
 _geom_torsion_atom_site_label_4
 _geom_torsion
 _geom_torsion_site_symmetry_1
 _geom_torsion_site_symmetry_2
 _geom_torsion_site_symmetry_3
 _geom_torsion_site_symmetry_4
 _geom_torsion_publ_flag
C2 N1 N2 C3 -175.4(3) . . . . ?
C2 N1 N2 Pd1 2.0(4) . . . . ?
N2 N1 C2 O1 1.1(6) . . . . ?
N2 N1 C2 C1 -177.0(3) . . . . ?
Pd1 O1 C2 N1 -3.6(5) . . . . ?
Pd1 O1 C2 C1 174.5(3) . . . . ?
F2 C1 C2 N1 -2.9(6) . . . . ?
F3 C1 C2 N1 -124.0(4) . . . . ?
F1 C1 C2 N1 118.4(5) . . . . ?
F2 C1 C2 O1 178.7(4) . . . . ?
F3 C1 C2 O1 57.7(5) . . . . ?
F1 C1 C2 O1 -59.9(5) . . . . ?
N1 N2 C3 O2 -179.0(4) . . . . ?
Pd1 N2 C3 O2 4.2(7) . . . . ?
N1 N2 C3 C4 1.0(5) . . . . ?
Pd1 N2 C3 C4 -175.7(3) . . . . ?
O2 C3 C4 F5 -119.1(5) . . . . ?
N2 C3 C4 F5 60.8(6) . . . . ?
O2 C3 C4 F6 0.6(6) . . . . ?
N2 C3 C4 F6 -179.4(4) . . . . ?
O2 C3 C4 F4 117.7(4) . . . . ?
N2 C3 C4 F4 -62.3(5) . . . . ?
C7 N3 C5 C6 86.2(7) . . . . ?
C8 N3 C5 C6 -155.7(7) . . . . ?
Pd1 N3 C5 C6 -35.2(8) . . . . ?
N3 C5 C6 N4 44.6(10) . . . . ?
C10 N4 C6 C5 92.2(7) . . . . ?
C9 N4 C6 C5 -148.0(6) . . . . ?
Pd1 N4 C6 C5 -29.1(8) . . . . ?


#==============================================================================
# Additional structures and associated data_? identifiers
# should be added at this point if there is more than one 
# structure analysis in the CIF.

_shelx_res_file
;

    shelxl.res created by SHELXL-2014/7

TITL PdtmedaCF3NN
CELL  0.71075 13.02040 8.14910 15.15900 90.00000 91.19750 90.00000
ZERR  4 0.00190 0.00100 0.00190 0.00000 0.00780 0.00000
LATT 1
SYMM .50-X, .50+Y, .50-Z
SFAC C H F N O PD
UNIT 40 64 24 16 8 4
L.S. 10
FMAP 2
PLAN 25
WPDB -2
HTAB
BOND $H
CONF
LIST 4
TEMP -79.8
ACTA
SIZE 0.200 0.200 0.200
WGHT    0.033700    1.074800
FVAR       0.70786
PD1   6    0.641236    0.440563    0.384804    11.00000    0.02404    0.02444 =
         0.02264   -0.00103    0.00032   -0.00067
F1    3    0.454334   -0.025080    0.315215    11.00000    0.08034    0.04505 =
         0.18149   -0.02617    0.03119   -0.01911
F2    3    0.343356    0.121989    0.248664    11.00000    0.10288    0.13083 =
         0.05388    0.01124   -0.02366   -0.08253
F3    3    0.346290    0.111493    0.387830    11.00000    0.05808    0.09662 =
         0.05447   -0.00655    0.02131   -0.03953
F4    3    0.475419    0.460811    0.089584    11.00000    0.09847    0.11955 =
         0.02815    0.00128   -0.00948   -0.03910
F5    3    0.374226    0.601777    0.170790    11.00000    0.02749    0.14022 =
         0.10068    0.04899   -0.01036    0.00554
F6    3    0.480178    0.723308    0.087351    11.00000    0.07603    0.12440 =
         0.07581    0.06506   -0.03205   -0.01562
O1    5    0.539812    0.257724    0.393578    11.00000    0.03583    0.04246 =
         0.03782    0.00618   -0.00096   -0.01181
O2    5    0.611620    0.718005    0.209922    11.00000    0.05970    0.05302 =
         0.06214    0.02745   -0.01993   -0.01790
N1    4    0.477449    0.363653    0.260254    11.00000    0.02912    0.04562 =
         0.03116   -0.00340    0.00291   -0.00968
N2    4    0.555024    0.483728    0.273785    11.00000    0.02771    0.03336 =
         0.02639    0.00141   -0.00170   -0.00352
N3    4    0.756508    0.613242    0.381602    11.00000    0.04725    0.03334 =
         0.03613    0.00483   -0.01460   -0.01324
N4    4    0.708886    0.368783    0.502462    11.00000    0.03563    0.03619 =
         0.02933    0.00723   -0.00355    0.00055
C1    1    0.405288    0.118278    0.317658    11.00000    0.04444    0.05344 =
         0.04342   -0.00502    0.00831   -0.01773
C2    1    0.479819    0.259756    0.324366    11.00000    0.02880    0.04094 =
         0.03040   -0.00825    0.00869   -0.00440
C3    1    0.552356    0.601322    0.213682    11.00000    0.03261    0.04223 =
         0.03039    0.00372   -0.00224    0.00805
C4    1    0.468770    0.595361    0.141283    11.00000    0.04066    0.08099 =
         0.04726    0.02727   -0.00908   -0.00611
C5    1    0.830815    0.560017    0.452314    11.00000    0.10569    0.11303 =
         0.09495    0.06099   -0.07343   -0.07514
AFIX  23
H1    2    0.878852    0.480209    0.426293    11.00000   -1.20000
H2    2    0.871710    0.656866    0.470971    11.00000   -1.20000
AFIX   0
C6    1    0.791132    0.491602    0.524889    11.00000    0.07420    0.09269 =
         0.05728    0.02337   -0.03787   -0.03480
AFIX  23
H3    2    0.761992    0.578864    0.562292    11.00000   -1.20000
H4    2    0.846721    0.436741    0.559303    11.00000   -1.20000
AFIX   0
C7    1    0.718038    0.779161    0.396939    11.00000    0.09815    0.03623 =
         0.05675   -0.01839    0.01822   -0.01983
AFIX  33
H5    2    0.679234    0.781038    0.451632    11.00000   -1.20000
H6    2    0.776033    0.855466    0.402043    11.00000   -1.20000
H7    2    0.673063    0.812183    0.347422    11.00000   -1.20000
AFIX   0
C8    1    0.814589    0.613101    0.299107    11.00000    0.03829    0.04095 =
         0.07811    0.00503    0.01474   -0.00718
AFIX  33
H8    2    0.840857    0.502477    0.288002    11.00000   -1.20000
H9    2    0.769266    0.646726    0.249942    11.00000   -1.20000
H10   2    0.872236    0.690008    0.304562    11.00000   -1.20000
AFIX   0
C9    1    0.632392    0.371749    0.574235    11.00000    0.06677    0.06875 =
         0.02760    0.00493    0.00799    0.00855
AFIX  33
H11   2    0.605318    0.483250    0.580531    11.00000   -1.20000
H12   2    0.575924    0.296408    0.559524    11.00000   -1.20000
H13   2    0.665641    0.337537    0.629840    11.00000   -1.20000
AFIX   0
C10   1    0.748167    0.199688    0.494594    11.00000    0.06259    0.06005 =
         0.05553    0.01781    0.00416    0.02604
AFIX  33
H14   2    0.798693    0.195112    0.447639    11.00000   -1.20000
H15   2    0.780807    0.166387    0.550617    11.00000   -1.20000
H16   2    0.691090    0.125258    0.480301    11.00000   -1.20000
AFIX   0
HKLF 4

REM  PdtmedaCF3NN
REM R1 =  0.0417 for    3299 Fo > 4sig(Fo)  and  0.0475 for all    3647 data
REM    208 parameters refined using      0 restraints

END

WGHT      0.0335      1.0925

REM Instructions for potential hydrogen bonds
EQIV $1 x+1/2, -y+3/2, z+1/2
HTAB C5 F6_$1
EQIV $2 -x+1, -y+1, -z+1
HTAB C7 F3_$2
HTAB C7 O2
EQIV $3 -x+3/2, y-1/2, -z+1/2
HTAB C8 O2_$3
HTAB C8 O2
EQIV $4 -x+3/2, y+1/2, -z+1/2
HTAB C8 N1_$4
HTAB C9 O1
HTAB C10 O1

REM Highest difference peak  1.129,  deepest hole -0.971,  1-sigma level  0.109
Q1    1   0.7776  0.6333  0.4858  11.00000  0.05    0.80
Q2    1   0.8211  0.4321  0.4843  11.00000  0.05    0.70
Q3    1   0.4248  0.0358  0.2581  11.00000  0.05    0.58
Q4    1   0.6321  0.5316  0.3542  11.00000  0.05    0.52
Q5    1   0.6466  0.5622  0.4211  11.00000  0.05    0.51
Q6    1   0.6338  0.6774  0.3856  11.00000  0.05    0.43
Q7    1   0.7119  0.6508  0.4186  11.00000  0.05    0.43
Q8    1   0.5829  0.5580  0.4520  11.00000  0.05    0.41
Q9    1   0.5938  0.4635  0.2942  11.00000  0.05    0.39
Q10   1   0.3013  0.2649  0.3019  11.00000  0.05    0.39
Q11   1   0.8955  0.6365  0.4548  11.00000  0.05    0.36
Q12   1   0.7948  0.5006  0.5485  11.00000  0.05    0.36
Q13   1   0.4240  0.5384  0.0950  11.00000  0.05    0.35
Q14   1   0.7636  0.5564  0.4043  11.00000  0.05    0.35
Q15   1   0.6164  0.6084  0.2673  11.00000  0.05    0.35
Q16   1   0.7297  0.7731  0.4560  11.00000  0.05    0.34
Q17   1   0.3534  0.5622  0.1665  11.00000  0.05    0.34
Q18   1   0.3823  0.6943  0.2015  11.00000  0.05    0.33
Q19   1   0.5913  0.7949  0.3384  11.00000  0.05    0.32
Q20   1   0.4743  0.5621  0.1264  11.00000  0.05    0.31
Q21   1   0.5061 -0.1689  0.3319  11.00000  0.05    0.31
Q22   1   0.5790  0.5423  0.2231  11.00000  0.05    0.30
Q23   1   0.3558 -0.0260  0.3406  11.00000  0.05    0.30
Q24   1   0.6277  0.3514  0.3309  11.00000  0.05    0.30
Q25   1   0.7057  0.5728  0.3241  11.00000  0.05    0.30
;

_shelx_res_checksum   35821

_shelx_hkl_file
;
   0   0  -3    3.27    2.67
   0   0   3    2.16    1.85
   0   0   3    5.97    4.83
   0   0  -3    2.20    7.27
   0   0  -5    2.77    2.92
   0   0   5    5.55    3.97
   0   0   5    2.36    5.58
   0   0  -5    2.53    3.76
   0   0   6 6301.87  450.30
   0   0  -6 5822.95  417.06
   0   0  -7    4.08    5.13
   0   0   7    2.65    5.91
   0   0   7   10.31    6.83
   0   0  -9    3.95    4.06
   0   0 -10 4928.65  252.07
   0   0  10 5961.18  306.00
   0   0 -11    6.69    4.88
   0   0 -12  612.47   43.07
   0   0  12  716.00   51.65
   0   0 -13    7.71    5.17
   0   0  13   11.16    9.45
   0   0 -14 1412.24  100.95
   0   0  14 1791.88  129.32
   0   0 -15    1.53    3.31
   0   0  15    2.90    9.23
   0   0 -16  384.62   38.22
   0   0  16  498.05   49.62
   0   0 -17   10.32    7.91
   0   0  18 1041.52   96.41
   0   0  19    9.84   13.78
   0   1  -3  159.84   11.22
   0   1  -3  203.89   14.00
   0   1   3  253.38   15.84
   0   1   3  198.25   12.58
   0  -1  -3  247.61   14.43
   0  -1  -3  196.91   12.39
   0  -1   3  191.97   13.08
   0  -1   3  179.60   12.27
   0   1   4 1583.22  113.90
   0   1  -4 1023.96   77.52
   0   1   4 1223.56   88.86
   0   1  -4 1149.73   84.26
   0  -1  -4 1347.59   97.13
   0  -1   4 1051.04   76.96
   0  -1  -4 1265.69   91.79
   0  -1   4 1194.23   87.43
   0   1  -5 4377.14  314.07
   0  -1  -5 4598.42  329.17
   0  -1   5 4165.41  299.09
   0  -1   5 4219.35  302.49
   0   1  -6  472.46  102.29
   0   1   6  568.35   34.30
   0   1   6  682.81   38.78
   0  -1   6  631.46   47.98
   0  -1   6  558.62   34.49
   0  -1  -6  593.69   33.01
   0  -1  -6  617.42   47.06
   0   1  -7  457.53   84.95
   0   1   7  548.31   33.46
   0   1   7  661.00   36.64
   0  -1  -7  557.72   31.58
   0  -1   7  553.16   34.55
   0  -1   7  607.02   35.63
   0  -1  -7  561.18   33.82
   0   1  -8  675.52   65.93
   0   1   8 1008.44   74.46
   0   1   8  823.59   62.65
   0  -1  -8  753.19   56.35
   0  -1   8  800.20   61.87
   0   1  -9 5298.85  316.97
   0  -1  -9 5768.04  343.21
   0  -1   9 5889.74  353.13
   0   1 -10  376.01   28.80
   0   1  10  456.04   34.91
   0   1  10  603.70   41.84
   0  -1  10  477.90   37.07
   0  -1 -10  395.61   28.55
   0   1 -11  544.81   43.28
   0   1  11  691.58   54.20
   0  -1 -11  629.60   47.76
   0  -1  11  680.29   54.07
   0   1 -12  330.22   30.24
   0   1  12  430.69   34.77
   0  -1 -12  351.46   27.29
   0  -1  12  402.54   33.84
   0   1 -13 1423.16   78.99
   0   1  13 1765.79   97.25
   0  -1 -13 1545.28   82.61
   0  -1  13 1633.00   91.23
   0   1 -14   34.84   10.87
   0   1  14   22.25   10.96
   0  -1 -14   40.84    8.77
   0  -1  14   47.88   12.94
   0   1 -15   21.22    7.98
   0   1  15   17.59   17.31
   0  -1 -15   36.08    8.71
   0  -1  15   14.11   12.46
   0   1 -16  236.99   25.66
   0   1  16  271.06   33.44
   0  -1 -16  249.44   26.03
   0  -1  16  306.10   39.62
   0   1 -17 1302.35  102.34
   0   1  17 1775.33  140.71
   0  -1  17 1648.89  131.78
   0   1 -18   11.88    8.25
   0   1  18   35.63   23.72
   0  -1  18   16.68   10.87
   0   1  19   51.87   28.57
   0  -1  19   48.68   17.79
   0   2  -1 1546.65  111.49
   0   2  -1 1401.85  101.72
   0   2   1 1526.69  110.10
   0  -2  -1 1519.35  109.60
   0  -2  -1 1494.23  107.10
   0  -2   1 1487.13  107.23
   0  -2   1 1454.46  105.68
   0   2  -2   25.92    4.99
   0   2  -2   22.27   11.96
   0   2   2   25.81    3.88
   0   2   2   26.91    3.58
   0  -2  -2   28.45    2.95
   0  -2   2   38.43    6.01
   0  -2   2   26.40    9.79
   0   2  -3 1593.48  115.94
   0   2   3 1934.91  138.94
   0   2  -3 1940.47  140.29
   0  -2   3 1789.09  129.86
   0  -2  -3 2236.32  160.37
   0  -2  -3 2111.17  151.33
   0  -2   3 1847.49  133.71
   0   2  -4 2662.56  192.24
   0   2  -4 3183.46  229.27
   0  -2  -4 3404.60  243.66
   0  -2   4 3191.78  229.78
   0  -2   4 3021.90  217.79
   0   2  -5  508.96   40.07
   0   2   5  583.06   33.93
   0   2   5  675.96   50.04
   0   2  -5  543.07   34.10
   0  -2  -5  845.04   61.76
   0  -2   5  548.23   43.37
   0  -2  -5  640.99   47.90
   0  -2   5  600.39   46.28
   0   2  -6  284.08   26.57
   0   2   6  468.23   26.53
   0   2   6  406.79   25.00
   0  -2  -6  515.62   28.99
   0  -2  -6  439.16   26.26
   0  -2   6  397.58   25.92
   0   2  -7 2979.02  174.00
   0   2   7 3639.77  210.45
   0  -2  -7 4181.22  239.84
   0  -2   7 3563.96  207.97
   0  -2  -7 3922.12  226.31
   0   2  -8 1513.75   94.49
   0   2   8 2399.32  144.20
   0   2   8 1848.00  113.69
   0  -2  -8 2006.60  121.01
   0  -2   8 1935.46  120.63
   0   2  -9  126.61   23.44
   0   2   9  198.00   26.52
   0   2   9  191.79   36.07
   0  -2  -9  154.71   20.94
   0  -2   9  185.81   24.56
   0   2 -10  116.03   16.81
   0   2  10  161.78   16.63
   0   2  10  168.22   16.87
   0  -2 -10  130.87   14.63
   0  -2  10  140.83   19.42
   0   2 -11  824.92   61.82
   0   2  11 1308.13   91.10
   0   2  11 1072.85   39.97
   0  -2 -11 1013.51   49.73
   0  -2  11  960.72   72.27
   0   2 -12  877.74   53.07
   0   2  12  991.27   67.63
   0  -2 -12 1048.76   54.84
   0  -2  12 1018.31   72.22
   0   2 -13   18.33    6.35
   0   2  13   34.58   12.24
   0  -2 -13   24.36    6.87
   0  -2  13   23.83   12.15
   0   2 -14  307.64   30.24
   0   2  14  411.89   35.97
   0  -2 -14  346.90   28.25
   0  -2  14  406.36   37.13
   0   2 -15  592.24   41.28
   0   2  15  688.58   48.65
   0  -2  15  833.05   58.70
   0   2 -16   98.96   21.55
   0   2  16  116.18   23.31
   0  -2  16  138.81   27.95
   0   2 -17  104.37   18.42
   0   2  17  142.06   23.76
   0  -2  17  103.17   25.04
   0   2 -18  198.33   28.26
   0   2  18  268.80   35.49
   0  -2  18  288.53   38.26
   0   2 -19  104.52   22.41
   0   2  19  160.03   26.34
   0  -2  19  147.35   34.17
   0  -3   0    6.13    5.08
   0  -3   0    6.67    5.02
   0  -3   0    1.45    4.07
   0  -3   0    4.56    4.95
   0   3  -1 1528.10  110.75
   0  -3   1 1541.71  112.49
   0  -3  -1 1447.03  105.36
   0  -3  -1 1469.30  105.81
   0  -3  -1 1481.48  107.74
   0  -3   1 1463.21  106.01
   0  -3  -1 1447.95  104.38
   0   3  -2 3065.73  221.11
   0   3  -2 3629.90  260.41
   0   3   2 3600.43  258.21
   0  -3   2 3409.49  245.52
   0  -3   2 3405.13  244.51
   0  -3  -2 3636.67  260.82
   0   3  -3  376.61   24.23
   0   3   3  467.16   27.23
   0   3   3  433.00   24.23
   0   3  -3  481.66   28.82
   0  -3  -3  499.94   27.33
   0  -3   3  475.73   28.78
   0   3  -4    7.57    5.12
   0   3   4    7.05    7.37
   0   3   4   10.98    6.19
   0   3  -4    8.47    5.80
   0  -3  -4    5.03    4.70
   0  -3  -4    5.40    6.17
   0  -3   4    4.07    4.51
   0   3  -5  403.12   26.69
   0   3   5  490.66   28.23
   0   3   5  477.76   27.63
   0  -3  -5  631.95   35.62
   0  -3  -5  521.01   29.31
   0  -3   5  457.92   28.56
   0   3  -6 4737.85  284.51
   0  -3  -6 6023.09  357.53
   0  -3   6 5605.92  335.39
   0   3  -7   17.22   11.86
   0   3   7   27.33    6.37
   0   3   7   22.63    4.81
   0  -3  -7   47.62    7.12
   0  -3  -7   25.75    6.52
   0  -3   7   28.79   10.97
   0   3  -8  167.55   18.64
   0   3   8  229.95   17.65
   0   3   8  188.38   19.69
   0  -3  -8  224.71   29.33
   0  -3  -8  215.34   18.29
   0  -3   8  209.76   19.92
   0   3  -9  598.68   47.59
   0   3   9  829.98   60.38
   0   3   9  667.83   52.10
   0  -3  -9  856.38   62.38
   0  -3   9  702.71   55.67
   0   3 -10 2082.77  100.81
   0   3  10 3005.20  136.42
   0   3  10 2651.61  122.94
   0  -3 -10 2841.26  129.18
   0  -3  10 2609.99  124.43
   0   3 -11  119.56   14.71
   0   3  11  147.63    9.74
   0   3  11  131.91   19.42
   0  -3 -11  123.41    9.64
   0  -3  11  124.28   17.50
   0   3 -12  377.48   36.63
   0   3  12  517.87   45.52
   0  -3 -12  466.36   39.14
   0  -3  12  489.30   45.99
   0   3 -13  456.02   39.26
   0   3  13  532.70   42.99
   0  -3 -13  540.77   40.89
   0  -3  13  576.40   48.71
   0   3 -14  561.39   47.44
   0   3  14  692.22   55.02
   0  -3  14  629.58   54.75
   0   3 -15   18.21   11.90
   0   3  15    9.51    9.78
   0  -3  15   19.18    9.69
   0   3 -16  618.83   57.50
   0   3  16  709.94   62.17
   0  -3  16  785.59   70.95
   0   3 -17   91.53   27.56
   0   3  17  134.09   25.04
   0  -3  17  136.44   41.74
   0   3 -18   67.93   15.02
   0   3  18  116.49   44.14
   0  -3  18   99.40   23.53
   0  -4   0   47.67    8.53
   0  -4   0   50.75    5.92
   0  -4   0   48.65    8.03
   0  -4  -1 2464.64  143.89
   0  -4  -1 2520.09  147.35
   0  -4   1 2234.71  131.59
   0  -4   1 2487.78  144.26
   0  -4  -1 2569.36  148.04
   0  -4   1 2500.41  145.11
   0  -4  -1 2402.16  138.57
   0   4  -2  112.46   11.04
   0  -4  -2   96.79    9.29
   0  -4  -2  116.18    8.50
   0  -4   2  108.03    9.90
   0  -4  -2  100.58    9.65
   0  -4  -2   95.66    7.78
   0   4  -3 3126.37  183.19
   0   4  -3 3490.11  202.23
   0  -4  -3 3848.54  220.30
   0  -4   3 3442.70  199.55
   0  -4  -3 3624.99  209.46
   0   4  -4  304.96   27.25
   0   4   4  374.19   30.02
   0   4   4  310.87   24.35
   0  -4  -4  417.57   33.04
   0  -4  -4  420.42   32.09
   0  -4   4  374.01   31.14
   0   4  -5  426.73   38.57
   0   4   5  505.09   39.13
   0   4   5  469.00   35.58
   0  -4  -5  624.14   47.50
   0  -4  -5  588.85   44.11
   0  -4   5  510.02   41.01
   0   4  -6   75.64   15.52
   0   4   6  119.15   17.25
   0   4   6   96.42   14.38
   0  -4  -6  136.68   18.77
   0  -4  -6  102.65   14.45
   0  -4   6   84.62   15.20
   0   4  -7 2845.12  150.72
   0   4   7 3567.71  182.29
   0   4   7 3157.04  161.80
   0  -4  -7 4236.09  215.73
   0  -4  -7 3826.26  195.15
   0  -4   7 3185.09  167.04
   0   4  -8   71.05   15.06
   0   4   8   86.96   10.38
   0   4   8   65.88   10.92
   0  -4  -8  107.33   12.67
   0  -4   8  110.66   17.59
   0  -4  -8   88.97   11.13
   0   4  -9    5.55    9.07
   0   4   9    5.35    5.37
   0   4   9   10.99    6.78
   0  -4  -9   10.16    5.01
   0  -4   9    6.63    8.59
   0   4 -10   91.32   17.87
   0   4  10  130.68    9.78
   0   4  10  134.84   11.30
   0  -4 -10  172.78   11.98
   0  -4  10  127.34   17.40
   0   4 -11 1852.41  103.02
   0   4  11 2260.19  118.22
   0  -4 -11 2495.25  126.92
   0  -4  11 2257.04  122.46
   0   4 -12   22.37   11.94
   0   4  12   19.61   11.76
   0  -4 -12    8.78    6.57
   0  -4  12   20.13   10.70
   0   4 -13    8.21    9.05
   0   4  13    7.22    8.76
   0  -4  13   12.75   10.65
   0   4 -14   20.82   11.10
   0   4  14   15.94    8.59
   0  -4  14   16.74   15.97
   0   4 -15  774.13   63.92
   0   4  15  876.46   73.34
   0  -4  15  944.53   77.35
   0   4 -16   85.83   18.13
   0   4  16  106.66   19.71
   0  -4  16  108.08   22.80
   0   4 -17   16.74   11.42
   0   4  17   46.98   16.76
   0  -4  17   45.95   26.89
   0   4 -18    4.07    7.84
   0  -4  18   18.15   19.63
   0  -5   0    6.81    8.10
   0  -5   0    0.76    2.19
   0  -5   0   15.15    6.46
   0  -5   1  776.09   54.21
   0  -5  -1  800.54   54.81
   0  -5   1  776.82   51.98
   0  -5  -1  798.99   52.25
   0  -5   1  849.39   56.03
   0  -5  -1  749.04   49.17
   0  -5  -2 5189.31  265.40
   0  -5   2 4632.44  239.05
   0  -5  -2 5499.77  277.90
   0  -5   2 5379.71  273.91
   0  -5  -2 5035.63  254.69
   0  -5  -3    7.28    4.15
   0  -5   3    7.12    7.22
   0  -5  -3    3.33    4.50
   0  -5   3    1.47    3.43
   0  -5  -3    3.68    3.84
   0   5  -4  188.88   19.66
   0   5   4  154.72   15.32
   0  -5  -4  220.52   19.53
   0  -5  -4  210.90   16.04
   0  -5   4  197.80   17.23
   0   5  -5  218.61   24.08
   0   5   5  272.27   21.74
   0  -5  -5  332.26   28.12
   0  -5  -5  287.00   22.28
   0  -5   5  223.52   20.79
   0   5  -6 3300.68  182.00
   0   5   6 3536.64  187.85
   0  -5  -6 4763.76  253.66
   0  -5  -6 4166.40  220.65
   0  -5   6 3635.21  197.43
   0   5  -7    6.28    6.77
   0   5   7    7.16    6.08
   0   5   7    2.03    5.91
   0  -5  -7    3.87    2.78
   0  -5  -7    2.70    4.28
   0  -5   7   11.09    5.90
   0   5  -8  780.46   57.42
   0   5   8  888.77   20.96
   0  -5  -8 1368.60   26.56
   0  -5  -8 1004.37   21.98
   0   5  -9  346.57   35.43
   0   5   9  432.96   36.76
   0  -5  -9  692.22   56.61
   0  -5   9  440.47   41.24
   0   5 -10 1581.07   64.10
   0   5  10 1726.71   59.83
   0  -5 -10 2457.10   79.76
   0  -5  10 1891.12   73.99
   0   5 -11   32.20   23.56
   0   5  11   46.03    9.48
   0  -5 -11   59.02    9.46
   0  -5  11   43.13   18.98
   0   5 -12  583.45   42.81
   0   5  12  728.39   44.58
   0  -5  12  771.09   53.38
   0   5 -13   71.06   19.11
   0   5  13   57.40   15.29
   0  -5  13   45.30   16.06
   0   5 -14  413.79   42.05
   0  -5  14  470.32   50.78
   0   5 -15   10.84    7.35
   0  -5  15    7.98   12.56
   0   5 -16  464.44   45.44
   0  -5  16  591.12   55.40
   0   5 -17   51.61   23.85
   0  -5  17   58.02   25.04
   0  -6   0 2429.67  134.76
   0  -6   0 2442.64  132.11
   0  -6   0 2729.15  147.27
   0  -6   1 2771.74  130.68
   0  -6  -1 2849.32  132.80
   0  -6  -1 3052.78  137.36
   0  -6   1 3130.99  142.77
   0  -6  -1 2946.71  132.89
   0  -6   2   12.13    7.11
   0  -6  -2    4.40    7.53
   0  -6  -2   13.23    4.01
   0  -6   2    8.17    5.59
   0  -6  -2    8.98    7.82
   0  -6   3 1845.12   90.92
   0  -6  -3 2008.94   90.97
   0  -6   3 2217.95  104.22
   0  -6  -3 2056.27   93.13
   0  -6   4 2575.15  123.45
   0  -6  -4 3185.01  141.98
   0  -6   4 2879.94  133.89
   0  -6  -4 2586.39  115.99
   0  -6  -5  985.86   65.36
   0  -6   5  735.09   58.38
   0  -6  -5 1022.61   17.73
   0  -6   5  922.52   64.08
   0  -6  -5  785.61   50.28
   0   6   6  203.76   18.31
   0  -6  -6  229.02   22.66
   0  -6   6  212.28   23.09
   0   6  -7 1391.86   81.57
   0   6   7 1400.13   72.28
   0  -6  -7 2053.19  106.57
   0  -6   7 1577.55   90.48
   0   6  -8  612.65   34.56
   0   6   8  711.06   27.85
   0  -6  -8  952.91   37.87
   0  -6   8  733.38   37.20
   0   6  -9    9.76   11.27
   0   6   9   13.23    9.80
   0  -6  -9   15.19    5.26
   0  -6   9   18.35    8.36
   0   6 -10  393.93   46.28
   0  -6  10  479.25   51.97
   0   6 -11 1148.01   80.86
   0  -6  11 1426.61   94.09
   0   6 -12  231.43   36.85
   0  -6  12  319.43   42.49
   0   6 -13   32.57   23.38
   0  -6  13   35.73   16.76
   0   6 -14  238.75   36.99
   0  -6  14  308.82   46.54
   0   6 -15  451.75   48.05
   0  -6  15  541.24   52.90
   0   6 -16   20.84   21.25
   0  -6  16   28.30   23.50
   0  -7   0    7.11    6.30
   0  -7   0    2.59    3.27
   0  -7  -1  362.24   34.10
   0  -7   1  350.50   34.72
   0  -7  -1  366.85   31.87
   0  -7   1  393.77   35.03
   0  -7   2  117.01   17.91
   0  -7  -2  157.99   19.02
   0  -7   2  175.90   19.72
   0  -7  -2  156.18   15.38
   0  -7  -3  599.59   43.45
   0  -7   3  557.00   34.10
   0  -7  -3  610.49   23.90
   0  -7  -4  151.58   20.20
   0  -7   4   80.28   16.94
   0  -7   4  100.29   14.75
   0  -7  -5 1671.49   61.81
   0  -7   5 1355.04   57.96
   0  -7   5 1537.86   58.87
   0  -7  -6  421.65   33.57
   0  -7   6  294.59   32.05
   0  -7   6  330.41   28.67
   0  -7  -7  247.28   27.73
   0  -7   7  188.67   27.05
   0  -7   7  212.53   26.54
   0  -7  -8  108.75   15.38
   0  -7   8  115.94   21.35
   0  -7   8   99.45   16.08
   0  -7   9  478.91   48.51
   0  -7   9  571.38   54.46
   0  -7  10  389.29   47.17
   0  -7  10  385.06   45.30
   0  -7  11   11.86   12.53
   0  -7  11   11.07   12.65
   0  -7  12   54.04   30.65
   0  -7  12   42.66   24.60
   0  -7  13  814.68   75.74
   0  -7  13 1043.97   84.32
   0  -7  14   79.89   20.76
   0  -7  14   99.92   20.75
   0  -8   0  391.29   45.09
   0  -8   0  405.78   41.73
   0  -8   1  296.81   42.76
   0  -8  -1  325.33   37.16
   0  -8   1  299.46   31.89
   0  -8   2  120.91   19.76
   0  -8  -2  153.18   22.60
   0  -8   2  146.21   19.41
   0  -8  -3   11.08    7.01
   0  -8   3    4.45    5.34
   0  -8   3    6.84    3.05
   0  -8  -4 1770.19   96.08
   0  -8   4 1547.67   89.80
   0  -8   4 1701.53   92.38
   0  -8  -5   12.52    9.90
   0  -8   5   13.26   10.32
   0  -8   5   13.27    8.96
   0  -8  -6  145.74   24.09
   0  -8   6   97.65   20.37
   0  -8   6  168.17   26.39
   0  -8  -7   36.24    6.97
   0  -8   7   39.03   16.89
   0  -8   7   14.15   14.41
   0  -8   8  514.48   57.20
   0  -8   8  693.25   59.46
   0  -8   9    5.32   14.52
   0  -8   9    6.32    9.38
   0  -8  10  152.81   29.50
   0  -8  10  168.06   28.67
   0  -8  11   23.14   32.50
   0  -8  11   45.29   14.79
   0  -8  12  356.77   46.50
   0  -8  12  465.36   56.13
   0  -9   0    7.85    6.52
   0  -9   1  561.96   63.06
   0  -9  -1  647.16   53.82
   0  -9  -2   74.11   14.73
   0  -9   2   63.19   17.92
   0  -9  -3  348.65   42.71
   0  -9   3  330.84   43.84
   0  -9  -4   17.35    8.79
   0  -9   4    5.24   13.57
   0  -9  -5  890.66   62.60
   0  -9   5  669.82   54.21
   0  -9   5  781.51   58.81
   0  -9   6   29.75   13.55
   0  -9   6    9.51    8.58
   0  -9   7   28.15   14.52
   0  -9   7   51.34   13.98
   0  -9   8    7.02    6.42
   0  -9   9  609.34   72.06
   0  -9   9  648.30   71.88
   0  -9  10   17.11   14.63
   0  -9  10   10.23    8.58
   0 -10   0  387.66   41.30
   0 -10  -1   41.82   17.38
   0 -10   1   43.61   13.29
   0 -10  -2   66.31   18.96
   0 -10   2    7.80   12.94
   0 -10  -3  149.00   23.29
   0 -10   3  153.48   24.56
   0 -10   4  435.06   58.23
   0 -10   5   57.67   24.19
   0 -10   6   98.67   23.36
  -1   0  19  405.37   52.10
  -1   0  18   12.17   12.08
  -1   0  17 2843.28   69.80
   1   0 -16   13.13   13.07
  -1   0  16   10.71   10.28
   1   0 -15  257.66   28.82
  -1   0  15  352.60   42.66
   1   0 -14    5.53    4.15
  -1   0  14    3.31    4.77
   1   0 -13  588.66   49.86
  -1   0  13  646.69   59.93
   1   0 -12    7.24    5.67
  -1   0  12   10.40    6.51
   1   0 -11 4316.77  230.87
  -1   0  11 5433.86  292.42
   1   0 -10    3.54    5.59
  -1   0  10    8.92    5.90
   1   0  -9 1702.63  104.17
  -1   0   9 2348.81  142.69
  -1   0   9 2052.75  127.22
   1   0  -6    1.21    2.84
  -1   0   6    5.74    5.43
   1   0  -6    9.73    5.62
  -1   0   6    2.59    4.63
   1   0  -5  123.13   10.17
  -1   0   5  123.40    9.61
  -1   0   5  122.55   11.25
   1   0  -5  138.92   11.82
   1   0  -4    1.57    2.13
  -1   0   4   10.07    2.65
   1   0  -4    4.99    5.94
  -1   0   4    3.84    7.83
   1   0  -2    2.84    2.06
  -1   0   2    2.76    1.91
   1   0  -2    9.85    3.47
  -1   0  -2    3.44    3.57
   1   0   2    8.11    3.80
  -1   0  -2    2.11    2.45
   1   0   2    1.68    2.49
  -1   0  -3  357.41   21.54
   1   0   3  415.36   25.56
   1   0   3  351.08   20.95
  -1   0  -3  358.29   21.55
  -1   0  -4    4.35    3.86
   1   0   4   18.47    4.65
  -1   0  -4    0.68    4.04
  -1   0  -6    1.80    4.42
   1   0   6    3.40    4.30
  -1   0  -6   16.78    5.77
  -1   0  -7 1159.74   23.69
   1   0   7 1399.67   75.60
   1   0   7 1132.86   63.52
  -1   0  -8    9.01    6.63
   1   0   8   16.00    6.60
  -1   0  -9 3117.20  188.16
   1   0   9 3301.30  200.20
  -1   0 -10    5.61    4.26
   1   0  10    3.66    6.52
  -1   0 -11 3372.45  182.55
   1   0  11 3952.12  214.89
  -1   0 -12    3.23    6.13
   1   0  12    7.10    6.92
  -1   0 -13 2300.56  120.90
   1   0  13 2514.99  134.72
  -1   0 -14    4.03    6.88
   1   0  14   13.19    8.31
  -1   0 -15 1509.92  109.12
   1   0  15 1811.31  132.43
  -1   0 -17  467.55   43.93
   1   0  17  643.07   58.27
  -1   0 -18    6.11    8.45
   1   0  18   11.78    8.66
   1   0  19  639.56   72.83
  -1   1  19   99.76   19.78
  -1  -1  19  175.35   27.35
  -1   1  18   40.53   14.12
  -1  -1  18    7.48   14.30
   1   1 -17   13.64    8.76
  -1   1  17   26.66   19.53
  -1  -1  17   61.81   20.06
   1   1 -16  890.64   61.40
  -1   1  16 1107.17   77.62
  -1  -1  16 1164.69   82.57
   1   1 -15  250.88   31.17
  -1   1  15  278.48   41.19
   1  -1 -15  255.37   30.18
  -1  -1  15  289.47   38.22
   1   1 -14  261.08   24.00
  -1   1  14  286.86   27.55
   1  -1 -14  259.73   22.38
  -1  -1  14  313.95   30.12
   1   1 -13  152.12   19.08
  -1   1  13  188.36   22.32
   1  -1 -13  138.21   14.86
  -1  -1  13  156.30   29.59
   1   1 -12 1854.30   96.04
  -1   1  12 2228.13  114.51
   1  -1 -12 1913.08   95.44
  -1  -1  12 2321.45  120.91
   1   1 -11  207.51   18.93
  -1   1  11  296.06   24.36
  -1   1  11  256.73   34.46
   1  -1 -11  181.85   16.32
  -1  -1  11  214.46   23.12
   1   1 -10  169.09   15.63
  -1   1  10  277.60   20.77
  -1   1  10  237.51   21.32
   1  -1 -10  181.86   15.25
  -1  -1  10  205.51   20.58
   1   1  -9 1340.26   83.79
  -1   1   9 2180.52  131.56
  -1   1   9 1576.53   98.55
   1  -1  -9 1523.89   92.78
  -1  -1   9 1660.53  104.10
   1   1  -8 5204.78  310.68
   1   1  -7  458.18   29.33
  -1   1   7  648.02   35.41
  -1   1   7  592.25   35.56
   1  -1  -7  489.20   27.98
  -1  -1   7  552.50   34.06
   1   1  -6  606.84   36.26
  -1   1   6  790.99   44.39
  -1   1   6  899.25   47.86
  -1  -1   6  715.72   40.84
   1  -1  -6  663.75   35.72
  -1  -1   6  742.04   42.84
   1  -1  -6  819.74   46.88
   1   1  -5   13.97    3.70
   1   1  -5   15.03    5.34
  -1   1   5   18.31    4.38
  -1   1   5   19.02    5.78
   1  -1  -5   13.11    2.65
  -1  -1   5    7.14    5.63
   1  -1  -5   24.06    6.13
  -1  -1   5   14.90    4.79
   1   1  -4 2558.05  183.95
   1   1  -4 3316.33  238.28
  -1  -1   4 2738.15  196.84
  -1  -1   4 3047.88  219.21
   1  -1  -4 3390.95  243.14
   1   1  -3 1552.23  112.60
   1   1  -3 1966.27  141.83
  -1   1   3 1813.46  130.62
   1  -1  -3 2030.30  146.00
  -1  -1   3 1696.88  122.43
  -1  -1   3 1943.60  140.20
  -1   1   1  727.69   52.78
  -1   1  -3  775.57   59.27
  -1   1  -3  821.57   60.75
   1   1   3 1103.92   80.02
   1   1   3  816.15   59.17
  -1  -1  -3 1183.83   85.72
   1  -1   3  813.03   59.93
  -1  -1  -3  848.95   61.54
   1  -1   3  928.41   68.14
  -1  -1  -4 5270.23  376.36
  -1   1  -5  276.37   30.80
   1   1   5  286.55   18.40
   1   1   5  373.15   22.50
  -1   1  -5  286.49   19.40
  -1  -1  -5  371.09   23.00
   1  -1   5  325.21   22.98
  -1  -1  -5  311.64   19.69
   1  -1   5  280.74   19.29
  -1   1  -7 1515.42   90.67
   1   1   7 2385.12  138.91
   1   1   7 1854.42  109.36
  -1  -1  -7 1816.79  106.50
  -1  -1  -7 1919.44  113.01
   1  -1   7 1845.50  109.83
  -1   1  -8  136.12   10.36
   1   1   8  183.58   10.66
   1   1   8  114.77    9.97
  -1  -1  -8  126.87    9.03
   1  -1   8  130.36   12.16
  -1   1  -9   68.77    9.90
   1   1   9   92.50   10.14
  -1  -1  -9   80.53    8.52
   1  -1   9   94.93   11.23
  -1   1 -10 3782.99  196.20
   1   1  10 4413.77  227.92
  -1  -1 -10 4090.23  210.03
   1  -1  10 4189.14  217.86
  -1   1 -11  192.91   19.21
   1   1  11  248.32   25.30
  -1  -1 -11  203.49   18.71
   1  -1  11  206.42   24.70
  -1   1 -12  153.72   17.40
   1   1  12  201.88   20.71
  -1  -1 -12  144.48   14.78
   1  -1  12  159.18   19.52
  -1   1 -13  174.64   21.00
   1   1  13  221.71   28.38
  -1  -1 -13  190.88   20.47
   1  -1  13  231.82   26.43
  -1   1 -14 1081.37   80.61
   1   1  14 1503.01  108.91
  -1  -1 -14 1085.37   78.74
   1  -1  14 1327.36   98.58
  -1   1 -15  576.91   40.12
   1   1  15  772.76   51.93
  -1  -1 -15  579.58   37.71
   1  -1  15  712.12   50.06
  -1   1 -16  461.44   44.96
   1   1  16  630.96   48.52
  -1  -1 -16  440.27   42.01
   1  -1  16  656.29   54.69
  -1   1 -17   88.58   17.76
   1   1  17  131.21   25.52
  -1  -1 -17  117.22   19.81
   1  -1  17  189.08   29.64
  -1   1 -18  474.92   48.09
   1   1  18  545.11   60.29
   1  -1  18  641.26   64.39
   1   1  19    7.69   13.29
   1  -1  19   12.44   13.82
  -1   2  19  126.00   21.31
  -1  -2  19  144.37   24.51
   1   2 -18  297.88   35.97
  -1   2  18  370.65   37.57
  -1  -2  18  372.90   39.97
   1   2 -17  258.46   35.45
  -1   2  17  386.08   48.04
  -1  -2  17  304.75   46.56
   1   2 -16    8.34    5.20
  -1   2  16   10.96    6.85
  -1  -2  16    5.00    8.68
   1   2 -15  591.32   40.04
  -1   2  15  689.01   47.24
  -1  -2  15  589.81   45.95
   1   2 -14  715.16   55.40
  -1   2  14  907.03   69.43
   1  -2 -14  775.68   56.46
  -1  -2  14  900.85   71.18
   1   2 -13  115.49   14.88
  -1   2  13  169.46   24.92
   1  -2 -13  117.55   12.18
  -1  -2  13  118.62   19.44
  -1   2  12    3.65    6.06
  -1   2  12    4.78    4.40
   1  -2 -12    2.88    4.44
  -1  -2  12    6.94    5.00
   1   2 -11 1192.48   61.64
  -1   2  11 1883.79   86.80
  -1   2  11 1462.16   74.54
   1  -2 -11 1278.19   60.21
  -1  -2  11 1493.59   76.71
   1   2 -10 1975.77  110.06
  -1   2  10 3010.08  160.53
  -1   2  10 2355.84  130.64
   1  -2 -10 2213.93  118.88
  -1  -2  10 2436.49  135.61
   1   2  -9  548.37   40.87
  -1   2   9  952.21   61.23
  -1   2   9  684.81   47.66
   1  -2  -9  660.94   43.50
  -1  -2   9  707.24   50.78
   1   2  -8  828.81   63.89
  -1   2   8 1263.86   91.81
  -1   2   8  956.92   72.16
   1  -2  -8  943.66   68.85
  -1  -2   8 1038.21   78.94
   1   2  -7 1429.11   90.15
  -1   2   7 2183.03  125.65
  -1   2   7 1770.37  104.91
   1  -2  -7 1837.56  106.04
  -1  -2   7 1672.59  100.50
   1  -2  -7 2020.36  118.96
   1   2  -6  844.24   48.12
  -1   2   6 1179.36   61.60
  -1   2   6 1086.49   59.33
   1  -2  -6 1159.31   60.65
  -1  -2   6 1067.55   59.83
   1  -2  -6 1132.55   61.74
   1   2  -5  144.71   15.00
  -1   2   5  162.05   11.75
  -1  -2   5  176.94   14.15
   1  -2  -5  220.67   12.71
   1  -2  -5  178.46   13.13
  -1  -2   5  168.11   13.55
   1   2  -4 7747.96  397.68
  -1  -2   3 4310.74  309.12
  -1  -2   2 4556.16  326.31
  -1   2   1    7.84    4.09
   1   2  -1    4.99    4.12
  -1   2   1   16.96    4.05
   1  -2  -1    8.94    3.00
  -1  -2   1   10.62    3.76
   1  -2  -1   10.57    2.82
  -1  -2   1    6.91    2.83
  -1  -2   1    4.45    6.62
  -1   2  -1 1266.12   92.07
   1   2   1 1521.87  110.08
   1  -2   1 1440.63  104.45
  -1  -2  -1 1532.81  110.90
   1  -2   1 1334.56   96.73
   1  -2   1 1328.20   96.33
  -1   2  -2 2782.33  200.19
  -1   2  -2 2969.74  213.33
  -1  -2  -2 3439.52  246.44
   1  -2   2 2910.44  209.11
   1  -2   2 3054.38  219.48
  -1   2  -3    4.32    4.24
   1   2   3    2.71    3.11
   1   2   3    6.61    5.12
  -1   2  -3    9.44    5.78
  -1  -2  -3    7.42    4.40
   1  -2   3    1.24    5.53
  -1  -2  -3    2.70    1.45
   1   2   4 1038.06   75.95
  -1   2  -4  721.58   57.92
   1   2   4  929.95   67.52
  -1   2  -4  865.14   65.08
  -1  -2  -4 1234.50   90.07
   1  -2   4  906.23   67.56
   1  -2   4  869.15   64.91
  -1  -2  -4  952.85   69.06
  -1   2  -5  907.74   50.91
   1   2   5 1217.79   20.16
   1   2   5 1067.36   56.90
  -1  -2  -5 1373.47   72.93
   1  -2   5  960.50   53.83
  -1  -2  -5 1048.65   55.94
  -1   2  -6   58.46   23.25
   1   2   6   89.05    8.28
   1   2   6   66.78    7.04
  -1  -2  -6   95.83    9.06
   1  -2   6   33.37   18.84
  -1  -2  -6   61.96    6.80
  -1   2  -7 1723.94  103.42
   1   2   7 2610.32  151.64
   1   2   7 2032.58  119.04
  -1  -2  -7 2508.75  145.61
   1  -2   7 1940.73  115.71
  -1  -2  -7 2117.51  123.84
  -1   2  -8 3141.59  192.79
   1   2   8 5084.53  303.00
   1   2   8 3767.55  225.89
  -1  -2  -8 3952.28  236.24
   1  -2   8 3577.07  217.37
  -1   2  -9 1684.70   91.34
   1   2   9 2582.23  133.82
   1   2   9 2288.77  120.28
  -1  -2  -9 2244.32  116.91
   1  -2   9 1985.28  107.32
  -1   2 -10  151.27   17.66
   1   2  10  182.18   17.57
  -1  -2 -10  174.99   16.79
   1  -2  10  155.02   14.79
  -1   2 -11  133.85   14.51
   1   2  11  186.31   19.58
  -1  -2 -11  158.83   12.66
   1  -2  11  180.12   20.64
  -1   2 -12   76.99   14.21
   1   2  12  103.92   13.46
  -1  -2 -12   89.36   10.73
   1  -2  12   67.07   12.21
  -1   2 -13  491.90   31.58
   1   2  13  597.30   33.99
  -1  -2 -13  488.44   34.69
   1  -2  13  586.88   38.47
  -1   2 -14   95.81   19.09
   1   2  14   99.33   22.55
  -1  -2 -14   69.50   13.40
   1  -2  14   87.66   20.32
  -1   2 -15  434.44   34.43
   1   2  15  618.51   47.22
  -1  -2 -15  514.46   33.04
   1  -2  15  541.73   41.55
  -1   2 -16  627.27   51.59
   1   2  16  874.95   70.30
   1  -2  16  771.43   64.14
  -1   2 -17  108.19   19.90
   1   2  17  109.63   27.25
   1  -2  17  124.95   23.99
  -1   2 -18   99.27   17.53
   1   2  18   96.73   28.56
   1  -2  18   37.25   24.32
  -1   2 -19  294.42   33.60
   1   2  19  334.09   37.62
   1  -2  19  401.05   47.20
   1   3 -18    8.88    6.34
  -1   3  18   30.00   13.37
  -1  -3  18    5.15    8.80
   1   3 -17  169.23   27.91
  -1   3  17  216.85   34.34
  -1  -3  17  199.80   40.18
   1   3 -16  105.45   19.00
  -1   3  16   91.82   28.47
  -1  -3  16  118.81   24.19
   1   3 -15  590.96   44.23
  -1   3  15  578.30   56.07
  -1  -3  15  731.84   56.52
   1   3 -14   35.08   10.88
  -1   3  14   29.02   20.73
  -1  -3  14   22.81   17.24
   1   3 -13  307.56   28.92
  -1   3  13  364.62   33.86
   1  -3 -13  317.72   24.64
  -1  -3  13  416.51   38.24
   1   3 -12  268.48   28.58
  -1   3  12  276.90   28.07
   1  -3 -12  232.58   20.71
  -1  -3  12  261.40   30.59
   1   3 -11  731.42   53.67
  -1   3  11 1075.48   21.70
  -1   3  11  903.70   62.47
   1  -3 -11  917.29   18.73
  -1  -3  11  947.10   67.48
   1   3 -10   13.23   12.90
  -1   3  10    9.67    3.13
  -1   3  10    3.30    2.93
   1  -3 -10    2.64    2.48
  -1  -3  10    7.84    6.89
   1   3  -9 1908.47  108.98
  -1   3   9 2477.75  132.20
  -1   3   9 2283.15  125.42
   1  -3  -9 2385.16  127.07
  -1  -3   9 2365.17  132.23
   1   3  -8 1677.53   91.34
  -1   3   8 2114.49  108.19
  -1   3   8 2070.34  109.10
   1  -3  -8 2496.44  127.22
  -1  -3   8 2132.87  114.57
   1   3  -7 1733.89  108.25
  -1   3   7 2153.03  128.73
  -1   3   7 2010.52  122.59
   1  -3  -7 2681.11  159.72
   1  -3  -7 2328.70  141.07
  -1  -3   7 2236.11  137.87
  -1   3   6    7.35    3.64
  -1   3   6    6.03    4.56
   1  -3  -6    8.17    3.86
  -1  -3   6   12.47    8.37
   1  -3  -6    3.91    4.63
   1   3  -5 1407.66   85.23
  -1   3   5 1631.65   94.52
  -1   3   5 1492.63   87.72
   1  -3  -5 2116.33  122.03
   1  -3  -5 1892.85  110.60
  -1  -3   5 1698.91  101.28
   1   3  -4 1398.22   84.30
  -1   3   4 1588.59   93.13
   1   3  -4 1676.30   99.25
   1  -3  -4 1919.55  110.97
   1  -3  -4 1768.73  103.32
  -1  -3   4 1706.84  100.97
  -1   3   3  849.37   46.12
   1   3  -3  958.74   52.65
   1  -3  -3  938.84   50.32
   1  -3  -3  852.06   45.82
   1  -3  -3  981.30   52.69
  -1  -3   3  808.78   47.67
  -1  -3   3  923.83   50.80
   1   3  -2  645.37   48.18
  -1   3   2  565.57   42.57
   1  -3  -2  598.23   46.40
  -1  -3   2  572.52   44.93
   1  -3  -2  598.76   44.68
   1  -3  -2  621.15   46.15
  -1  -3   2  673.84   50.22
  -1  -3   2  603.08   47.10
   1  -3  -1 5560.45  397.55
  -1  -3   1 5880.59  303.02
  -1   3   0   29.75   14.36
   1   3   0   30.34    4.65
   1   3   0   31.52    8.71
  -1  -3   0   30.02    6.11
   1  -3   0   31.05    6.26
  -1  -3   0   34.85    3.93
   1  -3   0   23.63    7.03
   1  -3   0   22.25    5.72
  -1   3  -1   42.70   10.26
   1   3   1   47.22    7.22
   1  -3   1   49.15    6.86
  -1  -3  -1   39.22    5.87
  -1  -3  -1   41.26    3.38
   1  -3   1   53.63    6.04
  -1  -3  -1   48.38    4.34
  -1   3  -2 1365.66  100.28
  -1   3  -2 1556.42  113.45
   1   3   2 1698.85  123.45
  -1  -3  -2 1621.53  117.91
  -1  -3  -2 1676.79  119.74
  -1  -3  -2 1617.53  115.56
   1  -3   2 1490.91  108.81
   1  -3   2 1589.24  116.28
  -1   3  -3 2032.07  119.85
   1   3   3 2510.64  145.58
  -1   3  -3 2411.48  140.71
  -1  -3  -3 2712.53  157.11
  -1  -3  -3 2634.56  150.30
   1  -3   3 2339.14  136.48
  -1   3  -4  392.03   26.57
   1   3   4  486.79   28.51
   1   3   4  482.14   26.50
  -1  -3  -4  613.68   34.95
  -1  -3  -4  540.39   29.17
   1  -3   4  489.10   30.08
  -1   3  -5 3660.57  213.03
   1   3   5 4460.43  256.50
  -1  -3  -5 5789.40  331.78
  -1  -3  -5 4497.32  257.06
   1  -3   5 4094.71  237.66
  -1   3  -6  870.86   67.02
   1   3   6 1361.67   99.72
   1   3   6 1096.61   80.33
  -1  -3  -6 1525.79  111.44
   1  -3   6 1050.43   79.76
  -1  -3  -6 1153.75   84.19
  -1   3  -7 4818.04  289.92
   1   3   7 6516.15  387.27
  -1  -3  -7 7749.25  459.81
  -1  -3  -7 6464.81  383.78
   1  -3   7 5503.94  330.24
  -1   3  -8   81.21   29.77
   1   3   8  142.46   19.79
   1   3   8  114.71   17.29
  -1  -3  -8  126.99   18.08
  -1  -3  -8  142.27   20.12
   1  -3   8  105.90   17.98
  -1   3  -9  977.37   59.48
   1   3   9 1225.52   70.39
  -1  -3  -9 1507.43   27.64
   1  -3   9 1208.92   72.19
  -1   3 -10  547.50   43.22
   1   3  10  702.31   52.40
  -1  -3 -10  878.08   63.20
   1  -3  10  719.54   57.19
  -1   3 -11  709.32   52.71
   1   3  11  919.46   61.81
  -1  -3 -11  996.52   65.74
   1  -3  11  857.37   61.68
  -1   3 -12   67.51   12.14
   1   3  12   67.04   12.71
  -1  -3 -12   66.80    9.44
   1  -3  12   61.72   12.89
  -1   3 -13  627.00   51.11
   1   3  13  771.63   60.07
  -1  -3 -13  756.27   55.44
   1  -3  13  769.46   63.12
  -1   3 -14  245.55   32.34
   1   3  14  364.06   42.78
  -1  -3 -14  274.52   31.31
   1  -3  14  329.27   41.47
  -1   3 -15  243.70   36.21
   1   3  15  296.90   30.87
   1  -3  15  262.74   33.10
  -1   3 -16   31.29   13.63
   1   3  16   44.26   12.27
   1  -3  16   33.12   22.94
  -1   3 -17  397.18   44.07
   1   3  17  617.67   59.92
   1  -3  17  554.40   62.73
  -1   3 -18  130.30   20.08
   1   3  18  183.78   28.70
   1  -3  18   98.99   19.96
   1   4 -18  568.82   56.40
  -1  -4  18  758.35   80.16
   1   4 -17    3.36    5.67
  -1   4  17    8.75    9.51
  -1  -4  17   20.04   20.50
   1   4 -16   31.04    8.88
  -1   4  16   18.11    8.98
  -1  -4  16   22.99   13.38
   1   4 -15   11.50   10.56
  -1   4  15   11.03    8.86
  -1  -4  15    6.32   12.88
   1   4 -14 1302.45   88.34
  -1   4  14 1586.41  104.49
  -1  -4  14 1709.10  112.08
   1   4 -13   61.62   16.97
  -1   4  13   40.23   10.44
  -1  -4  13   70.89   22.44
   1   4 -12   64.55   16.81
  -1   4  12   92.77   15.02
  -1  -4  12   89.80   16.77
   1   4 -11    4.09    5.66
  -1   4  11    1.33    2.43
   1  -4 -11    1.80    2.36
  -1  -4  11    6.88    6.13
   1   4 -10 3188.50  160.64
  -1   4  10 3719.96  177.54
  -1   4  10 3610.63  176.72
   1  -4 -10 4113.46  196.11
  -1  -4  10 3810.72  190.09
  -1   4   9    1.55    3.93
  -1   4   9   10.92    6.86
   1  -4  -9    7.34    4.74
  -1  -4   9    8.05    5.92
   1   4  -8 1299.29   77.49
  -1   4   8 1622.44   87.89
  -1   4   8 1492.70   83.08
   1  -4  -8 2184.26  116.99
  -1  -4   8 1608.91   92.30
   1   4  -7  343.45   30.89
  -1   4   7  386.34   26.75
  -1   4   7  351.83   26.00
   1  -4  -7  528.22   35.56
  -1  -4   7  377.69   30.56
   1  -4  -7  432.75   30.84
   1   4  -6 2127.00  114.35
  -1   4   6 2333.44  120.76
   1  -4  -6 3204.37  163.34
   1  -4  -6 2927.93  150.47
  -1  -4   6 2575.74  136.43
   1   4  -5  105.83   13.57
  -1   4   5   92.34    7.91
   1  -4  -5   84.61    6.54
   1  -4  -5  126.40    9.19
   1  -4  -5  114.14    8.28
  -1  -4   5   96.74    9.80
  -1   4   4 2551.09  153.08
   1  -4  -4 3090.63  184.92
  -1  -4   4 2424.45  148.98
   1  -4  -4 2527.17  151.77
   1  -4  -4 3038.53  181.79
  -1  -4   4 2731.08  165.22
   1   4  -3  820.06   62.04
  -1   4   3  721.70   54.46
   1  -4  -3  815.82   60.83
  -1  -4   3  703.98   42.49
   1  -4  -3  858.37   63.45
  -1  -4   3  862.36   65.08
   1  -4  -3  740.61   55.79
   1   4  -2 2799.55  162.30
  -1   4   2 2492.13  144.17
   1  -4  -2 2489.03  144.81
  -1  -4   2 2586.31  152.04
   1  -4  -2 2674.97  154.65
  -1  -4   2 2792.75  161.76
   1  -4  -2 2663.33  154.73
   1   4  -1  306.56   18.81
   1  -4  -1  308.40   20.42
   1  -4  -1  275.37   18.46
   1  -4  -1  315.43   19.84
  -1  -4   1  345.90   21.03
  -1  -4   1  323.51   22.03
   1  -4  -1  295.27   18.38
  -1  -4   0 4588.75  265.08
   1  -4   0 4359.46  251.57
  -1  -4   0 4383.49  250.80
   1  -4   0 4303.74  247.34
   1  -4   0 4258.78  244.93
  -1   4  -1  393.09   25.73
  -1  -4  -1  455.63   28.71
   1  -4   1  425.92   25.87
  -1  -4  -1  450.90   24.99
  -1  -4  -1  499.93   27.39
   1  -4   1  480.20   29.08
  -1   4  -2 1358.00   82.69
  -1  -4  -2 1598.92   95.15
   1  -4   2 1490.62   88.71
  -1  -4  -2 1599.44   91.88
  -1  -4  -2 1625.43   93.37
   1  -4   2 1484.56   88.58
  -1   4  -3  586.07   46.90
   1   4   3  663.43   50.84
  -1  -4  -3  792.35   60.45
  -1  -4  -3  732.95   52.92
   1  -4   3  677.85   52.57
  -1  -4  -3  653.82   47.32
  -1   4  -4 1636.07  102.07
   1   4   4 1906.48  116.41
   1   4   4 1583.49   94.49
  -1  -4  -4 2189.50  133.14
  -1  -4  -4 2066.08  122.76
   1  -4   4 1792.82  110.89
  -1   4  -5  269.81   26.87
   1   4   5  340.85   27.83
   1   4   5  279.25   21.40
  -1  -4  -5  402.66   51.42
  -1  -4  -5  314.52   23.76
   1  -4   5  286.90   38.26
  -1   4  -6  664.74   48.52
   1   4   6  851.39   56.52
   1   4   6  772.99   50.26
  -1  -4  -6 1070.77   70.43
  -1  -4  -6  925.69   59.30
   1  -4   6  829.67   57.09
  -1   4  -7   52.31   25.76
   1   4   7   75.71   10.26
   1   4   7   72.46    8.63
  -1  -4  -7   71.33    9.57
   1  -4   7   78.18   15.02
  -1  -4  -7   63.98    8.58
  -1   4  -8 2274.08  127.87
   1   4   8 2528.01  136.09
  -1  -4  -8 3713.11  198.63
  -1  -4  -8 2765.55  148.08
   1  -4   8 2699.74  149.51
  -1   4  -9   18.46    7.57
   1   4   9    7.69    4.86
  -1  -4  -9   10.22    5.72
   1  -4   9   13.84    8.95
  -1  -4  -9    0.82    5.29
  -1   4 -10   71.06   21.03
   1   4  10   89.65   14.15
  -1  -4 -10  114.64    9.87
   1  -4  10   85.90   15.70
  -1   4 -11   95.09   17.23
   1   4  11  112.97   15.84
  -1  -4 -11  123.08   14.17
   1  -4  11  103.88   19.65
  -1   4 -12 1056.02   80.22
   1   4  12 1376.35   97.98
  -1  -4 -12 1522.20  106.46
   1  -4  12 1329.66  100.38
  -1   4 -13   28.87   11.56
   1   4  13   11.31   13.15
  -1  -4 -13    8.16    5.57
   1  -4  13   12.53   11.36
  -1   4 -14   14.61    8.03
   1   4  14    4.66   14.03
   1  -4  14   12.22   16.19
  -1   4 -15    9.33   14.87
   1   4  15   29.15   14.12
   1  -4  15   35.96   19.33
  -1   4 -16  810.67   61.83
   1   4  16  950.35   68.27
   1  -4  16  883.15   67.63
  -1   4 -17    5.74   13.59
   1  -4  17   10.66   15.85
  -1   4 -18  102.42   23.58
   1  -4  18  106.04   27.81
  -1  -5  17  173.03   29.55
   1   5 -16  105.94   24.79
  -1  -5  16  114.72   22.42
   1   5 -15  501.02   51.34
  -1  -5  15  587.85   39.07
   1   5 -14   29.39   18.77
  -1   5  14   40.70   18.70
  -1  -5  14   47.51   19.40
   1   5 -13  831.76   62.46
  -1   5  13  830.80   57.28
  -1  -5  13  938.15   70.18
   1   5 -12  373.97   45.08
  -1   5  12  478.96   32.62
  -1  -5  12  544.33   41.28
   1   5 -11  340.38   34.03
  -1   5  11  376.98   30.98
  -1  -5  11  463.75   40.47
   1   5 -10  200.41   26.48
  -1   5  10  246.34   27.41
   1  -5 -10  275.41   27.82
  -1  -5  10  285.76   33.80
   1   5  -9 1581.27   89.39
  -1   5   9 1569.61   85.49
   1  -5  -9 2592.09  130.74
  -1  -5   9 1890.62  103.23
   1   5  -8  232.04   31.45
  -1   5   8  232.97   19.29
   1  -5  -8  227.17   17.65
   1  -5  -8  347.60   24.93
  -1  -5   8  291.81   27.30
  -1   5   7  371.24   28.30
   1  -5  -7  370.01   27.88
   1  -5  -7  586.61   43.11
   1  -5  -7  471.12   35.33
  -1  -5   7  452.85   37.73
  -1   5   6  575.36   43.52
   1  -5  -6  848.31   62.37
  -1  -5   6  623.65   51.99
   1  -5  -6  593.81   44.23
   1  -5  -6  779.51   57.04
  -1  -5   6  697.81   54.05
  -1   5   5 2953.81  158.08
   1  -5  -5 3981.36  212.39
  -1  -5   5 3080.92  169.78
   1  -5  -5 3129.31  167.78
   1  -5  -5 3734.16  198.70
  -1  -5   5 3419.83  185.29
  -1   5   4  167.36   16.94
   1  -5  -4  200.49   20.66
  -1  -5   4  183.16   19.77
   1  -5  -4  166.69   21.04
   1  -5  -4  226.83   17.24
  -1  -5   4  203.86   22.17
  -1   5   3   58.43   10.81
  -1  -5   3   57.13   13.45
   1  -5  -3   70.26   11.69
   1  -5  -3   59.04    9.23
  -1  -5   3   89.18   15.48
   1   5  -2 1351.63   88.02
  -1  -5   2 1257.26   84.16
   1  -5  -2 1369.13   87.97
  -1  -5   2 1349.61   87.01
   1  -5  -2 1246.58   81.63
   1  -5  -2 1216.43   78.29
   1  -5  -1 3326.79  172.22
  -1  -5   1 3282.22  171.28
  -1  -5   1 3177.71  162.67
   1  -5  -1 3282.39  168.46
  -1  -5   1 3720.48  189.81
   1  -5  -1 3168.93  162.61
  -1  -5   0   51.96   12.86
   1  -5   0   45.47   10.55
   1  -5   0   38.78    7.67
  -1  -5   0   40.95    7.40
  -1  -5   0   49.00    8.16
   1  -5   0   34.43    7.05
  -1  -5  -1  183.81   20.52
   1  -5   1  172.47   17.42
   1  -5   1  130.63   18.58
  -1  -5  -1  141.65   18.54
  -1  -5  -1  153.09   19.83
   1  -5   1  176.09   18.71
  -1   5  -2 1168.54   78.41
  -1  -5  -2 1409.80   92.29
  -1  -5  -2 1370.93   86.17
  -1  -5  -2 1353.01   85.14
   1  -5   2 1325.13   86.56
  -1   5  -3 7320.65  373.88
  -1  -5  -3 9574.92  485.02
  -1   5  -4  119.39   20.07
  -1  -5  -4  190.37   20.60
  -1  -5  -4  154.40   19.54
   1  -5   4  124.78   22.23
  -1  -5  -4  127.09   16.22
  -1   5  -5  424.52   40.45
   1   5   5  450.43   32.46
  -1  -5  -5  594.30   46.17
  -1  -5  -5  530.84   37.86
   1  -5   5  486.03   39.47
  -1   5  -6   78.26   15.02
   1   5   6  101.94   10.41
  -1  -5  -6  142.32   17.55
  -1  -5  -6   96.67    9.82
   1  -5   6  124.91   20.04
  -1   5  -7 1809.40  127.29
   1   5   7 1813.16   82.13
  -1  -5  -7 2771.36  127.83
  -1  -5  -7 2244.80  100.78
   1  -5   7 2097.10  103.66
  -1   5  -8   31.81   12.96
   1   5   8   33.64    5.31
  -1  -5  -8   73.27   10.58
   1  -5   8   44.07   13.06
  -1  -5  -8   45.42    5.96
  -1   5  -9 1390.71   82.23
   1   5   9 1470.24   76.32
  -1  -5  -9 2437.28  125.30
   1  -5   9 1674.42   93.94
  -1   5 -10  124.02   26.44
   1   5  10  158.37   18.40
  -1  -5 -10  230.39   25.19
   1  -5  10  216.36   30.84
  -1   5 -11  874.79   69.95
   1   5  11  988.32   70.94
  -1  -5 -11 1318.92   93.43
   1  -5  11  992.28   76.85
  -1   5 -12   51.69   13.77
   1   5  12   79.81   16.19
  -1  -5 -12   91.66   13.77
   1  -5  12   75.64   21.38
  -1   5 -13  988.41   70.50
   1   5  13 1038.37   68.65
   1  -5  13 1242.63   87.33
  -1   5 -14  135.27   22.99
   1  -5  14  194.66   32.61
  -1   5 -15  104.23   22.29
   1  -5  15  175.86   28.94
  -1   5 -16   27.18   15.42
   1  -5  16   16.17   18.87
  -1   5 -17  464.86   48.54
   1  -5  17  675.73   67.25
  -1  -6  16   12.69   16.46
  -1  -6  16   57.77   23.35
  -1  -6  15   91.86   22.31
  -1  -6  15  116.72   25.95
  -1  -6  14  735.61   74.49
  -1  -6  14  793.67   76.78
  -1  -6  13  270.46   41.02
  -1  -6  13  392.83   48.28
  -1  -6  12   58.64   17.93
  -1  -6  12   62.21   21.27
  -1   6  11  207.85   22.44
  -1  -6  11  227.08   32.79
  -1  -6  11  287.44   31.73
  -1   6  10  667.43   50.83
  -1  -6  10  649.80   57.01
  -1  -6  10  779.19   64.33
  -1   6   9   70.57    9.77
   1  -6  -9  116.33   12.82
  -1  -6   9   69.22   18.01
  -1  -6   9   62.72   12.96
  -1   6   8  185.83   20.64
   1  -6  -8  252.26   26.43
  -1  -6   8  171.64   25.85
  -1  -6   8  213.59   28.19
  -1   6   7 1122.56   59.74
   1  -6  -7 1684.14   87.72
  -1  -6   7 1265.47   71.52
  -1   6   6 1315.34   69.12
   1  -6  -6 1696.58   88.99
  -1  -6   6 1278.54   75.71
  -1  -6   6 1496.72   84.86
  -1   6   5  370.90   26.50
   1  -6  -5  429.35   32.17
  -1  -6   5  348.38   31.74
   1  -6  -5  441.32   31.14
  -1  -6   5  435.40   34.65
   1  -6  -4 1543.14   79.10
  -1  -6   4 1204.89   67.66
   1  -6  -4 1523.18   75.89
  -1  -6   4 1525.12   78.78
  -1  -6   3  944.78   38.53
   1  -6  -3  983.96   35.08
   1  -6  -3 1099.96   53.24
  -1  -6   3 1069.94   36.95
   1  -6  -3  967.16   31.22
   1  -6  -2 1652.14   79.95
  -1  -6   2 1518.11   76.39
   1  -6  -2 1616.66   75.35
  -1  -6   2 1660.56   78.41
   1  -6  -2 1579.55   74.06
  -1  -6   1   26.95   11.49
   1  -6  -1   20.89    6.26
  -1  -6   1   18.69    6.34
   1  -6  -1   16.18    5.13
  -1  -6   1   20.35    5.07
   1  -6  -1   26.21    6.59
   1  -6   0  660.09   50.72
  -1  -6   0  779.24   58.81
  -1  -6   0  692.76   49.03
  -1  -6   0  870.63   61.19
   1  -6   0  718.49   53.40
  -1  -6  -1 1556.02   77.02
   1  -6   1 1394.22   70.88
  -1  -6  -1 1464.16   67.23
  -1  -6  -1 1550.37   71.14
   1  -6   1 1499.90   71.91
  -1  -6  -2 1694.60   82.91
   1  -6   2 1534.88   77.71
  -1  -6  -2 1605.12   72.54
   1  -6   2 1531.50   74.13
  -1  -6  -2 1683.93   76.08
  -1  -6  -3  289.23   25.61
   1  -6   3  272.96   26.02
  -1  -6  -3  351.54   24.87
  -1  -6  -3  325.44   23.13
   1  -6   3  305.24   26.20
  -1   6  -4 1908.59  100.10
  -1  -6  -4 2457.25  123.14
   1  -6   4 2156.93  109.95
  -1   6  -5 1155.80   66.62
  -1  -6  -5 1570.66   81.34
   1  -6   5 1417.55   75.49
  -1  -6  -5 1422.17   67.62
  -1   6  -6   14.00   15.93
  -1  -6  -6    5.51    7.15
  -1  -6  -6    4.42    2.31
   1  -6   6   13.96   10.66
  -1  -6  -6    4.47    2.71
  -1   6  -7  101.59   23.67
   1   6   7  114.44    6.22
  -1  -6  -7  167.63   13.25
   1  -6   7  136.25   17.92
  -1   6  -8 1444.04   63.90
   1   6   8 1396.00   45.26
  -1  -6  -8 2218.91   76.90
   1  -6   8 1569.69   63.13
  -1   6  -9  168.61   21.99
  -1  -6  -9  299.66   26.01
   1  -6   9  215.95   23.85
  -1   6 -10   17.30   11.75
  -1  -6 -10    6.36    6.40
   1  -6  10    2.63    6.84
  -1   6 -11  690.30   52.45
   1  -6  11  884.63   64.12
  -1   6 -12 1144.69   90.35
   1  -6  12 1355.18  103.84
  -1   6 -13  269.83   37.62
   1  -6  13  370.65   51.20
  -1   6 -14   19.42   15.19
   1  -6  14   18.50   17.95
  -1   6 -15  231.14   32.63
   1  -6  15  317.39   47.87
  -1   6 -16  178.77   28.56
   1  -6  16  315.63   47.15
  -1  -7  14   13.76   18.96
  -1  -7  13  306.89   42.03
  -1  -7  13  424.61   44.51
  -1  -7  12  555.72   51.15
  -1  -7  12  733.51   61.19
  -1  -7  11   86.49   23.18
  -1  -7  11  107.64   23.26
  -1  -7  10    6.19    5.43
  -1  -7   9  384.85   41.63
  -1  -7   9  413.03   41.00
  -1  -7   8  471.71   38.09
  -1  -7   8  430.40   49.42
   1  -7  -7   90.76   15.90
  -1  -7   7   75.58   19.25
  -1  -7   7   85.51   16.57
   1  -7  -6  536.44   42.11
  -1  -7   6  349.69   33.68
  -1  -7   6  517.89   43.62
   1  -7  -5  230.51   21.31
  -1  -7   5  202.28   23.68
  -1  -7   5  234.06   22.74
   1  -7  -5  164.20   14.82
   1  -7  -4 2061.85   72.74
  -1  -7   4 1800.46   70.79
  -1  -7   4 2071.12   72.73
   1  -7  -4 1763.60   59.36
   1  -7  -3   82.55   17.90
  -1  -7   3   35.09   10.20
  -1  -7   3   54.30   11.43
   1  -7  -3   68.38    9.76
   1  -7  -2  614.82   53.18
  -1  -7   2  628.66   56.38
  -1  -7   2  686.64   57.09
   1  -7  -2  578.15   47.86
   1  -7  -1  684.83   59.10
  -1  -7   1  635.75   56.23
  -1  -7   1  610.36   50.50
   1  -7  -1  591.76   48.95
  -1  -7   0  923.54   55.03
   1  -7   0 1008.87   59.40
   1  -7   0 1033.54   56.84
  -1  -7   0 1100.01   58.87
  -1  -7  -1  221.52   26.30
   1  -7   1  192.37   22.54
  -1  -7  -1  211.00   19.51
   1  -7   1  166.67   17.21
  -1  -7  -2 1047.10   64.46
   1  -7   2  836.81   52.12
   1  -7   2  968.81   55.19
  -1  -7  -2  947.18   49.13
  -1  -7  -3  863.61   38.96
   1  -7   3  744.11   37.47
   1  -7   3  837.19   37.35
  -1  -7  -4  306.94   33.62
   1  -7   4  260.65   31.62
   1  -7   4  293.80   33.08
  -1  -7  -5  281.10   26.06
   1  -7   5  211.54   23.80
   1  -7   5  261.75   24.88
  -1  -7  -6 1413.58  101.83
   1  -7   6 1021.24   77.28
  -1   7  -7  483.20   45.01
  -1  -7  -7  647.24   64.81
   1  -7   7  459.55   50.15
  -1   7  -8   18.03   21.35
  -1  -7  -8   59.38   15.26
   1  -7   8   30.95   15.13
  -1   7  -9  128.42   28.23
  -1  -7  -9  225.54   15.63
   1  -7   9  167.88   28.33
  -1   7 -10  987.07   82.20
   1  -7  10 1185.25   93.17
  -1   7 -11   80.06   23.89
   1  -7  11  111.66   26.40
  -1   7 -12   11.46   12.52
   1  -7  12    9.32   17.42
  -1   7 -13   70.91   20.15
   1  -7  13   84.97   20.70
  -1   7 -14  387.23   49.27
   1  -7  14  484.27   60.53
  -1  -8  12   14.32   14.82
  -1  -8  12   12.92    7.55
  -1  -8  11  545.81   52.25
  -1  -8  11  649.63   57.45
  -1  -8  10   26.37   13.93
  -1  -8  10   26.92   11.14
  -1  -8   9  159.39   28.04
  -1  -8   9  172.37   17.67
  -1  -8   8   64.39   20.11
  -1  -8   8   40.44   12.42
  -1  -8   7  983.15   79.15
  -1  -8   7 1075.06   82.93
   1  -8  -6   10.60    7.22
  -1  -8   6    3.95    7.82
  -1  -8   6    2.79    5.15
   1  -8  -5  105.35   18.58
  -1  -8   5   69.60   21.71
  -1  -8   5  123.30   21.50
   1  -8  -4   13.49    9.70
  -1  -8   4   21.43   17.50
  -1  -8   4    6.34    5.26
   1  -8  -3 1342.77   77.81
  -1  -8   3 1270.69   75.71
  -1  -8   3 1483.53   79.91
   1  -8  -2    7.74    5.72
  -1  -8   2    8.71    8.69
  -1  -8   2    7.14    8.39
  -1  -8   1   60.06   16.02
   1  -8  -1   63.87   14.74
  -1  -8   1   84.55   15.01
   1  -8  -1   60.67   11.63
  -1  -8   0   45.87   21.59
   1  -8   0   16.11    7.03
   1  -8   0   36.35    9.23
  -1  -8  -1 1093.85   83.74
   1  -8   1  984.02   76.50
   1  -8   1 1071.64   79.60
  -1  -8  -2   11.22    8.24
   1  -8   2   11.61   12.91
   1  -8   2    2.48    3.70
  -1  -8  -3  288.40   37.37
   1  -8   3  242.88   31.80
   1  -8   3  288.34   34.37
  -1  -8  -4   14.78   14.23
   1  -8   4    6.62    6.28
   1  -8   4    2.30    6.94
  -1  -8  -5 1183.75   79.18
   1  -8   5  950.62   69.19
   1  -8   5 1015.05   68.33
  -1  -8  -6   30.43    9.05
   1  -8   6   32.56   17.84
   1  -8   6    4.86   11.75
  -1  -8  -7  192.41   32.18
   1  -8   7  119.37   29.45
   1  -8   7  116.94   21.96
   1  -8   8   39.37   22.22
   1  -8   8    6.57   10.32
   1  -8   9  536.71   51.13
   1  -8   9  585.86   33.12
   1  -8  10    7.92   12.31
   1  -8  10    3.23    5.45
   1  -8  11  238.66   37.89
   1  -8  11  273.56   35.65
   1  -8  12   19.15   20.43
   1  -8  12   11.78   18.04
  -1  -9  10   54.11   34.28
  -1  -9  10   26.22   14.48
  -1  -9   9   19.26   15.35
  -1  -9   9    5.22   12.23
  -1  -9   8  705.42   63.00
  -1  -9   8  792.06   64.51
  -1  -9   7    0.99    4.53
  -1  -9   6  157.68   31.90
   1  -9  -5   58.38   14.59
  -1  -9   5  105.52   24.90
   1  -9  -4  967.36   66.28
  -1  -9   4  909.89   67.09
   1  -9  -3    7.63    5.49
  -1  -9   3    7.44    8.69
   1  -9  -2  358.76   44.21
  -1  -9   2  364.01   45.46
  -1  -9   1    8.96    6.32
   1  -9  -1    1.97    4.39
   1  -9   0  329.15   40.72
  -1  -9   0  323.11   40.84
  -1  -9  -1   37.54   11.88
   1  -9   1   15.82   11.64
  -1  -9  -2  834.37   69.60
   1  -9   2  730.82   63.76
  -1  -9  -3   90.06   17.72
   1  -9   3   71.56   26.32
   1  -9   3   69.42   14.79
  -1  -9  -4  146.96   24.52
   1  -9   4  147.41   20.55
   1  -9   4  154.85   16.47
  -1  -9  -5    7.42    6.21
   1  -9   5   10.40    5.52
   1  -9   5    8.34    6.67
  -1  -9  -6  773.11   70.47
   1  -9   6  663.11   67.87
   1  -9   6  575.86   54.63
   1  -9   7   12.80    8.99
   1  -9   7    7.21   10.67
   1  -9   8    7.11    7.69
   1  -9   8   40.30   12.42
   1  -9   9   23.17   13.67
   1  -9   9   16.99    8.80
   1  -9  10  538.91   57.67
   1  -9  10  533.78   54.32
  -1 -10   6  238.76   33.30
  -1 -10   5   35.66   19.56
  -1 -10   4   49.06   17.97
   1 -10  -3  772.29   83.45
  -1 -10   3  614.61   69.60
   1 -10  -2   45.06   15.50
  -1 -10   2   32.24   18.83
  -1 -10   1    1.80    5.63
   1 -10  -1   12.64   15.45
  -1 -10   0  120.20   23.29
   1 -10   0  106.05   26.04
  -1 -10  -1  523.24   51.01
   1 -10   1  474.70   45.31
  -1 -10  -2   62.62   16.75
   1 -10   2   60.98   18.57
  -1 -10  -3   33.43   11.94
   1 -10   3   25.13   20.02
  -1 -10  -4  295.41   36.49
   1 -10   4  227.92   29.10
   1 -10   5  251.39   32.10
   1 -10   6   60.12   24.14
  -2   0  19   12.57   11.51
  -2   0  18  341.48   32.81
  -2   0  17    4.15   10.05
   2   0 -16  308.96   29.65
  -2   0  16  365.22   38.83
   2   0 -15    2.99    2.65
  -2   0  15    8.52   12.04
   2   0 -14  520.72   40.40
  -2   0  14  609.12   51.46
   2   0 -13    8.30    8.04
  -2   0  13    4.20    7.73
   2   0 -12  271.85   21.91
  -2   0  12  297.56   26.79
  -2   0  11    6.17   13.87
   2   0 -10 3414.24  175.30
  -2   0  10 4403.91  224.90
  -2   0  10 4012.19  208.77
  -2   0   9    1.32    3.18
  -2   0   9    5.20    4.79
   2   0  -8  345.88   27.51
  -2   0   8  454.32   35.30
  -2   0   8  427.46   36.85
   2   0  -7    1.19    2.56
  -2   0   7    3.40    4.96
  -2   0   7    8.88    7.40
   2   0  -5    2.20    3.12
  -2   0   5    0.44    1.96
   2   0  -5    2.50    3.77
  -2   0   4 3420.24  245.70
   2   0  -4 3666.92  263.21
  -2   0   3    2.07    3.04
  -2   0   3    3.86    3.05
   2   0  -3   10.43    5.01
  -2   0   1   13.74    5.47
   2   0  -1    2.91    2.39
  -2   0   1    3.68    4.28
  -2   0  -1   11.57    7.49
   2   0   1    4.10    3.84
  -2   0  -1    1.38    2.49
   2   0   1    1.52    1.78
   2   0   2   47.98    7.28
  -2   0  -2   50.99    6.21
   2   0   2   40.32    5.05
   2   0   2   40.74    6.51
  -2   0  -3    3.06    5.77
   2   0   3    4.04    6.27
  -2   0  -3    0.76    3.43
   2   0   3    3.12    3.98
  -2   0  -4  633.92   47.69
   2   0   4  745.04   41.26
   2   0   4  499.11   29.64
  -2   0  -4  554.55   42.05
  -2   0  -5    5.04    3.40
   2   0   5   15.17   11.93
   2   0   5    4.49    4.32
  -2   0  -5    2.41    8.26
  -2   0  -7    2.34    2.84
   2   0   7    7.58    6.38
  -2   0  -8 4363.05  261.57
   2   0   8 4350.59  261.26
  -2   0  -9    6.53    5.24
   2   0   9    2.84    7.48
  -2   0 -10 1952.28  108.56
   2   0  10 2089.90  117.57
  -2   0 -11    5.75    7.84
   2   0  11    5.86    8.11
  -2   0 -12 2643.68  132.78
   2   0  12 3091.40  155.29
  -2   0 -13    8.17    4.84
   2   0  13    6.05    8.84
  -2   0 -14  101.62   13.93
   2   0  14  162.92   19.66
   2   0  15    5.88    6.56
  -2   0 -16 2067.49  147.92
   2   0  16 2525.38   63.25
  -2   0 -17   14.61    7.94
   2   0  17    9.51   17.19
  -2   0 -18    4.41    5.70
   2   0  18   15.34   14.15
   2   0  19   13.63    9.79
  -2   1  19  712.62   80.39
  -2  -1  19  784.63   89.31
  -2   1  18  111.62   23.36
  -2  -1  18  128.75   27.93
   2   1 -17   75.13   15.21
  -2   1  17  121.72   28.81
  -2  -1  17   96.38   44.43
   2   1 -16    7.77    4.63
  -2   1  16   27.04   12.88
  -2  -1  16   13.46    9.93
   2   1 -15 1169.70   66.08
  -2   1  15 1463.59   84.82
  -2  -1  15 1456.68   85.51
  -2   1  14   11.80    9.04
   2   1 -14    5.22    5.08
  -2  -1  14   15.13   11.05
   2  -1 -14    2.88    4.18
  -2   1  13   46.99   17.34
   2   1 -13   45.11    8.00
  -2  -1  13   60.69   16.97
   2  -1 -13   66.39    9.04
  -2   1  12   72.64    8.43
  -2   1  12   41.77   11.39
   2  -1 -12   42.84   10.25
  -2  -1  12   58.29   12.92
   2   1 -11 4939.54  222.52
  -2   1  11 7634.33  337.05
  -2   1  11 6099.18  162.05
   2  -1 -11 5022.39  223.26
  -2  -1  11 6113.96  163.10
  -2   1  10  172.73   20.21
   2   1 -10  150.75   27.51
  -2   1  10  216.82   18.00
   2  -1 -10  136.11   13.20
  -2  -1  10  136.07   17.22
   2   1  -9 1082.14   71.31
  -2   1   9 1545.28   98.04
  -2   1   9 1237.81   83.95
   2  -1  -9 1085.61   69.63
  -2  -1   9 1196.93   80.74
   2   1  -8    6.32    8.69
  -2   1   8    9.32    5.76
  -2   1   8   10.34    6.84
  -2  -1   8    2.97    4.39
   2  -1  -8    4.97    3.59
  -2  -1   8    6.53    7.47
  -2  -1   7 7040.50  403.24
  -2  -1   7 6963.71  400.39
  -2   1   6    3.15    3.24
   2   1  -6    3.43    3.55
  -2   1   6    4.05    5.31
  -2  -1   6    3.94    6.50
   2  -1  -6    3.14    1.38
  -2  -1   6    4.10    4.65
  -2   1   5 2453.31  177.27
   2   1  -5 2101.29  151.85
   2   1  -5 2788.83  201.41
   2  -1  -5 2765.39  199.55
  -2  -1   5 2215.94  159.97
  -2  -1   5 2553.70  184.68
   2   1  -4 4073.96  292.28
  -2  -1   4 3353.94  240.57
  -2  -1   4 3785.45  271.81
   2  -1  -4 4030.27  289.00
  -2  -1   4 3279.17  235.45
  -2   1   3  247.97   16.75
   2   1  -3  260.37   17.13
  -2  -1   3  222.54   14.54
  -2  -1   3  239.14   15.78
  -2  -1   3  294.06   18.68
   2  -1  -3  274.22   17.77
  -2   1   0 1035.98   74.95
   2   1   0 1051.33   75.64
   2   1   0 1095.79   79.58
  -2   1   0  882.66   64.47
  -2  -1   0 1132.21   82.24
   2  -1   0  979.97   71.27
  -2  -1   0 1005.62   72.40
   2  -1   0 1204.43   86.89
   2   1   1  142.75   10.92
  -2   1  -1  119.64   10.04
  -2   1  -1  111.17    8.71
   2   1   1  115.66    7.59
   2  -1   1  147.14   11.11
  -2  -1  -1  144.52   10.34
   2  -1   1  116.61    9.01
  -2  -1  -1  108.21    7.04
  -2   1  -2  379.68   23.04
   2   1   2  349.75   20.19
   2   1   2  521.29   30.04
   2   1   2  373.08   20.95
  -2  -1  -2  509.98   29.79
   2  -1   2  440.93   29.70
   2  -1   2  354.86   21.54
  -2   1  -3 4281.21  306.67
   2  -1   3 5099.87  364.91
   2  -1   3 4051.53  290.38
  -2   1  -4 2587.62  186.67
   2   1   4 2713.45  194.69
  -2   1  -4 2525.40  182.43
   2   1   4 3750.40  268.96
   2  -1   4 3006.71  217.63
  -2  -1  -4 3617.99  259.57
   2  -1   4 2474.40  178.64
  -2  -1  -4 2608.30  187.21
  -2   1  -5  332.51   22.08
  -2   1  -5  314.02   21.73
   2   1   5  358.89   23.04
   2   1   5  452.80   28.25
   2  -1   5  286.47   20.21
  -2  -1  -5  416.43   26.77
   2  -1   5  395.48   77.45
  -2  -1  -5  316.58   19.98
  -2   1  -6   21.08    5.46
   2   1   6   22.84   11.22
   2   1   6   13.83    7.49
  -2  -1  -6   23.78    6.13
   2  -1   6    8.28    8.83
  -2  -1  -6   13.69    5.00
  -2  -1  -7 9649.06   65.12
  -2   1  -8 1112.42   83.59
   2   1   8 1169.04   87.10
  -2  -1  -8 1286.15   95.49
   2  -1   8 1126.43   85.15
  -2   1  -9   88.72   19.07
   2   1   9   95.05   16.30
  -2  -1  -9   95.02   15.13
   2  -1   9  103.30   29.98
  -2   1 -10  161.05   20.36
   2   1  10  233.90   22.82
  -2  -1 -10  215.55   19.81
   2  -1  10  156.88   14.17
  -2   1 -11 2490.50  117.63
   2   1  11 2946.92  137.41
  -2  -1 -11 2744.37  127.38
   2  -1  11 2927.11  137.94
  -2   1 -12  130.96   13.63
   2   1  12  175.27   19.05
  -2  -1 -12  124.80   15.04
   2  -1  12  167.63   21.37
   2   1  13  226.57   29.12
  -2   1 -13  146.23   21.42
   2  -1  13  178.04   26.30
  -2  -1 -13  173.02   20.91
  -2   1 -14  150.56   20.15
   2   1  14  187.89   21.40
  -2  -1 -14  124.15   15.81
   2  -1  14  161.25   20.62
   2   1  15 2041.84  115.51
  -2   1 -15 1738.08   97.27
   2  -1  15 2021.49  112.50
  -2  -1 -15 1741.86   94.58
  -2   1 -16   59.90   16.69
   2   1  16   70.20   18.05
  -2  -1 -16   81.39   17.58
   2  -1  16   97.83   23.36
  -2   1 -17   80.51   16.35
   2   1  17   56.83   15.32
  -2  -1 -17   57.17   18.08
   2  -1  17   94.53   25.86
  -2   1 -18   73.09   18.88
   2   1  18  133.04   25.08
   2  -1  18   85.22   29.97
  -2   1 -19  346.79   37.87
   2   1  19  464.17   47.74
   2  -1  19  440.95   47.40
  -2   2  19   46.52   27.15
  -2  -2  19   95.21   23.39
   2   2 -18  165.43   24.23
  -2   2  18  215.28   33.43
  -2  -2  18  186.61   30.04
   2   2 -17  547.11   42.79
  -2   2  17  636.85   51.15
  -2  -2  17  666.94   55.42
   2   2 -16  171.57   29.91
  -2   2  16  241.50   41.05
  -2  -2  16  255.68   44.49
   2   2 -15    0.88    4.28
  -2   2  15   16.94   15.92
  -2  -2  15    4.47   17.33
   2   2 -14  751.93   58.01
  -2   2  14  894.78   69.82
  -2  -2  14  841.81   67.91
   2   2 -13  612.91   30.83
  -2   2  13  684.49   43.90
   2  -2 -13  654.36   25.82
  -2  -2  13  727.29   38.87
  -2   2  12  107.77   14.02
   2   2 -12  111.43   12.99
  -2   2  12  154.89    8.08
   2  -2 -12  102.06    7.95
  -2  -2  12  132.73   16.73
   2   2 -11   22.52    9.54
  -2   2  11   24.34    4.44
  -2   2  11   15.99    7.13
   2  -2 -11   15.02    3.69
  -2  -2  11   36.93   18.13
   2   2 -10 1613.84  106.20
  -2   2  10 2512.26  133.61
  -2   2  10 1957.17  110.33
   2  -2 -10 1670.15   89.60
  -2  -2  10 1989.17  113.07
   2   2  -9 3617.20  187.41
  -2   2   9 4340.40  224.01
   2  -2  -9 3778.67  191.10
  -2  -2   9 4537.78  235.37
   2   2  -8  349.21   29.58
  -2   2   8  522.01   38.15
  -2   2   8  414.92   34.24
   2  -2  -8  363.45   27.76
  -2  -2   8  415.78   35.34
   2   2  -7   41.52    7.69
  -2   2   7   58.61    2.94
  -2   2   7   61.32   10.68
   2  -2  -7   38.62    3.45
  -2  -2   7   24.71   15.86
   2   2  -6 1912.94  113.87
  -2   2   6 2216.40  129.94
   2  -2  -6 2555.20  149.02
  -2  -2   6 2370.08  139.53
  -2   2   5 1350.29   80.27
   2   2  -5 1470.36   87.90
  -2  -2   5 1245.66   75.35
   2  -2  -5 1586.31   93.59
  -2  -2   5 1474.25   87.90
   2   2  -4 1059.22   78.36
  -2   2   4  863.86   64.04
  -2  -2   4  839.15   63.09
   2  -2  -4 1263.55   90.11
  -2  -2   4  808.18   60.52
   2  -2  -4 1040.24   76.79
  -2  -2   4  989.30   73.47
   2  -2  -4  905.29   64.64
   2   2  -3 3821.37  274.04
  -2  -2   3 3173.22  228.45
   2  -2  -3 3787.71  271.50
  -2  -2   3 3205.44  230.70
  -2   2   0   35.39    6.59
   2   2   0   38.64    3.72
   2   2   0   52.38    6.94
  -2   2   0   36.17    6.09
  -2  -2   0   50.17    7.07
   2  -2   0   40.09   10.05
  -2  -2   0   46.31    5.25
   2  -2   0   30.29    5.87
   2   2   1 4980.67  356.41
  -2  -2  -1 5297.40  378.94
  -2   2  -2 2212.00  159.86
   2   2   2 2766.93  199.08
   2  -2   2 2693.03  193.94
  -2  -2  -2 2829.41  203.52
   2  -2   2 2216.37  160.18
   2  -2   2 2207.02  159.46
  -2   2  -3  513.00   30.37
  -2   2  -3  564.12   43.19
   2   2   3  646.18   48.53
   2   2   3  622.47   45.02
  -2  -2  -3  728.16   41.86
   2  -2   3  534.04   31.45
  -2  -2  -3  540.71   39.26
   2  -2   3  611.72   46.58
  -2   2  -4  637.02   50.82
   2   2   4  793.84   57.73
  -2   2  -4  705.40   54.05
   2   2   4  904.01   67.17
   2  -2   4  829.34   62.31
  -2  -2  -4 1017.24   75.10
   2  -2   4  716.14   54.40
  -2  -2  -4  739.22   53.92
  -2   2  -5 5056.03  291.33
  -2   2  -6 1099.90   26.72
   2   2   6 1733.54  102.23
   2   2   6 1319.15   21.61
  -2  -2  -6 1755.38   28.81
  -2  -2  -6 1311.77   77.30
   2  -2   6 1274.63   77.72
  -2   2  -7  102.56   20.47
   2   2   7  159.07   10.65
   2   2   7  115.20    8.66
  -2  -2  -7  185.35   14.64
   2  -2   7  133.57   12.61
  -2  -2  -7  137.77    9.44
  -2   2  -8  704.94   56.19
   2   2   8  858.01   64.92
  -2  -2  -8 1035.21   77.64
   2  -2   8  853.45   66.15
  -2  -2  -8  963.81   72.11
  -2   2  -9 2314.86  123.61
   2   2   9 2597.47  135.65
  -2  -2  -9 2940.82  153.08
   2  -2   9 2348.02  125.68
  -2   2 -10 1300.84   77.29
   2   2  10 1525.27   85.70
  -2  -2 -10 1572.75   88.37
   2  -2  10 1473.55   85.92
  -2   2 -11   14.29    6.31
   2   2  11    6.32    5.53
  -2  -2 -11    8.37    5.40
   2  -2  11    9.09   11.94
  -2   2 -12  632.56   57.31
   2   2  12  791.49   66.83
  -2  -2 -12  775.86   64.36
   2  -2  12  871.31   54.09
  -2   2 -13 1842.77   71.16
   2   2  13 2212.31   82.88
  -2  -2 -13 2258.65   78.18
   2  -2  13 2186.03   83.89
  -2   2 -14   12.00    7.80
   2   2  14   14.21   14.63
  -2  -2 -14   12.92    7.01
   2  -2  14    9.90   14.23
  -2   2 -15   11.78    8.40
   2   2  15    4.71   11.41
  -2  -2 -15    7.69    6.59
  -2   2 -16  459.23   51.68
   2   2  16  579.71   63.92
  -2  -2 -16  554.28   59.00
   2  -2  16  552.48   64.01
  -2   2 -17  273.73   38.14
   2   2  17  288.44   39.43
   2  -2  17  344.36   53.88
  -2   2 -18   40.49   14.00
   2   2  18   81.71   22.85
   2  -2  18   19.40   19.06
  -2   2 -19   63.83   25.46
   2   2  19  125.11   23.39
   2  -2  19  143.51   31.27
  -2   3  18  545.90   64.71
  -2  -3  18  556.52   67.47
  -2   3  17   15.88    9.28
  -2  -3  17    4.48    6.28
   2   3 -16  514.98   47.55
  -2   3  16  645.96   58.06
  -2  -3  16  681.96   60.66
   2   3 -15  243.85   28.12
  -2   3  15  336.88   35.79
  -2  -3  15  330.34   36.96
   2   3 -14  318.22   38.26
  -2   3  14  334.01   41.01
  -2  -3  14  385.54   47.00
   2   3 -13   64.33   16.63
  -2   3  13   71.81   16.75
  -2  -3  13   92.75   17.02
   2   3 -12 2374.07   85.24
  -2   3  12 2776.43   96.07
  -2  -3  12 2761.97   99.36
  -2   3  11  566.16   41.81
   2   3 -11  460.25   36.01
  -2   3  11  603.44   38.21
   2  -3 -11  498.07   31.75
  -2  -3  11  605.51   46.68
   2   3 -10  915.71   36.62
  -2   3  10 1090.37   56.98
   2  -3 -10  973.16   25.78
  -2  -3  10 1177.55   63.29
   2   3  -9  116.46   16.25
  -2   3   9  141.13    4.51
  -2   3   9  159.22   16.64
   2  -3  -9  127.90   11.87
  -2  -3   9  147.22   19.73
   2   3  -8 2453.29  130.37
  -2   3   8 2755.43  143.72
   2  -3  -8 2774.19  139.66
  -2  -3   8 2943.13  155.76
   2   3  -7  224.47   33.09
  -2   3   7  257.05   33.93
  -2  -3   7  267.31   16.49
  -2   3   6  652.48   50.11
   2  -3  -6  898.88   64.79
  -2  -3   6  603.61   47.83
   2  -3  -6  590.85   42.79
   2  -3  -6  750.54   57.02
  -2  -3   6  632.33   51.64
  -2   3   5  756.37   43.06
   2  -3  -5  984.53   51.52
  -2  -3   5  682.08   40.90
   2  -3  -5  679.82   35.95
   2  -3  -5  841.89   47.29
  -2  -3   5  821.81   47.57
   2   3  -3  734.95   41.41
  -2   3   3  654.94   37.42
  -2  -3   3  639.68   38.16
   2  -3  -3  684.03   37.01
   2  -3  -3  764.19   42.51
  -2  -3   3  744.22   41.68
   2  -3  -3  678.71   36.78
  -2   3   2  794.98   44.33
   2   3  -2  921.32   50.02
   2  -3  -2  862.07   49.30
  -2  -3   2  796.96   45.45
   2  -3  -2  918.40   50.26
  -2  -3   2  903.48   49.00
  -2   3   1 2495.94  179.70
  -2   3   1 2487.57  179.30
   2   3  -1 2761.35  199.62
  -2  -3   1 2639.01  190.91
   2  -3  -1 2715.40  195.30
   2  -3  -1 2677.22  192.98
  -2  -3   1 3078.04  220.47
   2   3   0 8915.96  457.58
  -2   3  -1   66.52    8.21
   2   3   1   72.91    8.85
   2  -3   1   76.95    8.59
  -2  -3  -1   82.88    9.65
   2  -3   1   69.91    9.25
  -2  -3  -1   80.88    5.22
   2  -3   1   77.51    9.11
  -2   3  -2 2126.86  124.70
   2   3   2 2489.95  145.20
   2  -3   2 2449.13  142.95
  -2  -3  -2 2546.15  148.31
   2  -3   2 2204.47  128.87
   2  -3   2 2186.65  128.00
  -2   3  -3 1083.89   25.42
  -2   3  -3 1294.60   78.15
  -2  -3  -3 1569.75   93.31
   2  -3   3 1195.50   72.37
  -2   3  -4 1758.86  105.08
   2   3   4 2073.82  121.47
   2   3   4 2055.95  117.45
  -2  -3  -4 2522.07  147.00
   2  -3   4 1909.18  113.33
  -2  -3  -4 1932.85  110.44
  -2   3  -5    5.18    5.67
   2   3   5   12.54    2.84
   2   3   5   10.75    2.76
  -2  -3  -5   19.78    5.84
   2  -3   5   20.32   15.02
  -2  -3  -5   10.12    3.18
  -2   3  -6  732.10   57.25
   2   3   6  906.01   68.29
   2   3   6  839.93   61.73
  -2  -3  -6 1167.33   86.88
   2  -3   6  717.81   55.97
  -2  -3  -6  830.45   60.99
  -2   3  -7  369.09   31.93
   2   3   7  488.81   37.39
  -2  -3  -7  616.38   47.91
  -2  -3  -7  484.88   37.31
   2  -3   7  490.25   40.19
  -2   3  -8  252.86   31.13
   2   3   8  297.16   22.02
  -2  -3  -8  410.11   30.76
  -2  -3  -8  298.14   22.33
   2  -3   8  302.12   25.87
  -2   3  -9   19.06   11.23
   2   3   9   23.52    6.79
  -2  -3  -9   14.75    8.17
   2  -3   9    9.86    4.21
  -2   3 -10  302.65   28.13
   2   3  10  336.22   27.62
  -2  -3 -10  375.52   32.43
   2  -3  10  320.42   33.99
  -2   3 -11  231.04   24.33
   2   3  11  261.08   24.99
  -2  -3 -11  337.50   26.98
   2  -3  11  291.53   27.92
  -2   3 -12  197.70   26.21
   2   3  12  198.12   23.17
  -2  -3 -12  226.13   25.23
   2  -3  12  207.55   31.46
  -2   3 -13   54.76   12.87
   2   3  13   43.18    9.44
  -2  -3 -13   53.84    8.52
   2  -3  13   40.37   13.16
  -2   3 -14  289.49   37.39
   2   3  14  350.41   41.36
  -2  -3 -14  292.65   33.89
   2  -3  14  322.01   46.58
  -2   3 -15   20.84   13.58
   2   3  15   34.62   14.51
  -2  -3 -15   11.17    6.89
   2  -3  15   39.59   23.75
  -2   3 -16   45.34   14.22
   2   3  16   34.88   12.36
   2  -3  16   28.64   23.08
  -2   3 -17   18.71    9.13
   2   3  17    9.11    8.48
   2  -3  17    7.42    7.49
  -2   3 -18  384.13   48.86
   2   3  18  468.48   54.03
   2  -3  18  518.22   62.92
  -2   4  18   14.25   12.38
  -2  -4  18   16.25   11.49
  -2  -4  18    7.56   14.50
  -2   4  17  800.70   65.64
  -2  -4  17  828.25   68.58
  -2  -4  17  867.28   74.87
  -2   4  16   16.75   16.07
  -2  -4  16   15.00    5.29
  -2   4  15   14.54    8.80
  -2  -4  15    5.45    6.67
   2   4 -14    3.77    5.04
  -2   4  14    9.32    7.78
  -2  -4  14   12.55    7.94
   2   4 -13 1248.31   97.32
  -2   4  13 1595.83  115.99
  -2  -4  13 1756.13  129.51
   2   4 -12    8.69    8.49
  -2   4  12   19.53   17.38
  -2  -4  12   14.81   11.34
   2   4 -11  253.60   30.42
  -2   4  11  320.54   35.89
  -2  -4  11  252.73   32.59
   2   4 -10   51.36   11.86
   2  -4 -10   42.08    3.08
  -2  -4  10   40.34    9.36
  -2   4   9 1755.01   84.06
   2  -4  -9 1734.78   77.01
   2  -4  -9 2066.83   91.51
  -2  -4   9 2033.89   99.80
  -2   4   8  357.10   32.49
   2  -4  -8  460.19   33.16
  -2  -4   8  307.70   31.02
   2  -4  -8  314.09   22.96
  -2  -4   8  421.99   36.08
  -2   4   7  646.40   49.11
   2  -4  -7 1006.45   70.95
  -2  -4   7  596.01   47.84
   2  -4  -7  622.00   44.41
  -2  -4   7  751.34   57.97
  -2   4   6   52.46    9.89
   2  -4  -6   56.02    8.32
  -2  -4   6   54.15   13.44
   2  -4  -6   43.11    7.10
   2  -4  -6   47.00    8.91
  -2  -4   6   72.43   13.71
  -2   4   5 3332.91  200.14
   2  -4  -5 4038.48  240.18
  -2  -4   5 3078.72  187.62
   2  -4  -5 3350.57  199.55
   2  -4  -5 4099.44  245.31
  -2  -4   5 3694.04  222.56
  -2   4   4  947.46   70.43
  -2  -4   4  941.25   72.35
   2  -4  -4 1079.49   79.30
   2  -4  -4 1034.64   75.95
   2  -4  -4 1145.03   84.59
  -2  -4   4 1080.44   80.90
   2   4  -3  884.24   66.06
  -2   4   3  766.39   57.71
   2  -4  -3  817.30   60.75
  -2  -4   3  770.57   59.68
   2  -4  -3  845.93   63.14
  -2  -4   3  892.16   66.78
   2  -4  -3  825.06   61.30
   2   4  -2  588.64   33.91
  -2   4   2  535.01   31.66
   2  -4  -2  509.94   30.01
  -2  -4   2  532.86   34.26
   2  -4  -2  605.37   35.12
  -2  -4   2  582.23   34.45
   2  -4  -2  543.52   32.13
  -2   4   1 2496.75  145.61
  -2   4   1 2326.92  136.16
   2   4  -1 2827.94  163.03
   2  -4  -1 2809.89  163.24
  -2  -4   1 2550.16  150.11
   2  -4  -1 2781.58  161.57
  -2  -4   1 2970.25  171.06
  -2   4   0 1729.21  102.38
   2   4   0 2001.41  115.35
   2  -4   0 1896.41  111.80
  -2  -4   0 2247.43  129.31
  -2  -4   0 2007.61  119.40
   2  -4   0 1904.58  112.16
  -2   4  -1 2871.68  168.15
  -2  -4  -1 3042.08  173.59
  -2  -4  -1 3622.19  206.53
   2  -4   1 3101.52  180.17
  -2   4  -2  546.91   35.25
  -2  -4  -2  658.90   39.43
   2  -4   2  631.81   37.10
  -2   4  -3 1272.44   80.47
  -2  -4  -3 1687.03  104.28
   2  -4   3 1417.87   88.38
  -2   4  -4    2.39    5.58
  -2  -4  -4    4.33    5.46
   2  -4   4    7.53    5.54
  -2   4  -5 5621.37  337.51
  -2  -4  -5 8450.10  502.26
  -2   4  -6  199.82   20.48
   2   4   6  228.58   15.84
  -2  -4  -6  302.83   24.02
   2  -4   6  234.91   22.37
  -2  -4  -6  236.97   16.31
  -2   4  -7   27.32   15.35
   2   4   7   43.15    7.08
  -2  -4  -7   74.42   12.03
  -2  -4  -7   37.04    5.36
   2  -4   7   22.17    8.53
  -2   4  -8   93.83   13.09
   2   4   8   93.10    7.03
  -2  -4  -8  165.93   13.34
  -2  -4  -8  104.74    7.09
   2  -4   8  100.60   16.44
  -2   4  -9 3890.85  193.62
   2   4   9 4795.14  229.33
  -2  -4  -9 6730.55   65.02
  -2  -4  -9 4739.90  226.67
   2  -4   9 4724.88   69.70
  -2   4 -10  342.80  131.11
   2   4  10  545.39   45.63
  -2  -4 -10  783.78   64.84
   2  -4  10  551.31   50.27
  -2   4 -11   32.24   16.23
   2   4  11   17.01   14.14
  -2  -4 -11   30.20    7.97
   2  -4  11   33.08   20.97
  -2   4 -12  107.62   24.38
   2   4  12  104.76   18.46
  -2  -4 -12  119.89   14.39
   2  -4  12  110.02   19.03
  -2   4 -13 1431.75   83.61
   2   4  13 1682.63   90.33
  -2  -4 -13 2015.46  106.42
   2  -4  13 1726.43   98.42
  -2   4 -14   15.96   13.96
   2   4  14    8.47   11.75
  -2  -4 -14    8.65    7.70
   2  -4  14   10.46    7.17
  -2   4 -15  196.80   29.43
   2   4  15  261.11   33.78
   2  -4  15  220.23   34.91
  -2   4 -16    9.94    7.19
   2  -4  16    9.70   14.71
  -2   4 -17  653.27   61.12
   2  -4  17  730.05   66.30
  -2   4 -18   46.63   32.31
   2  -4  18   78.46   32.45
  -2  -5  17   17.38   13.12
  -2  -5  17   16.21   15.13
  -2  -5  16  294.67   38.56
  -2  -5  16  284.84   38.96
  -2   5  15  136.15   24.07
  -2  -5  15  135.55   25.05
  -2  -5  15   95.50   24.50
  -2   5  14  604.47   53.49
  -2  -5  14  658.86   59.38
  -2  -5  14  790.51   71.04
  -2   5  13   12.57   11.82
  -2  -5  13   21.72   14.59
  -2  -5  13    9.69   19.16
  -2   5  12  863.78   52.97
  -2  -5  12  743.73   55.71
  -2  -5  12 1063.79   67.65
  -2   5  11  100.15   20.61
  -2  -5  11  116.17   23.76
  -2  -5  11  140.13   24.62
  -2   5  10  236.98   26.35
  -2  -5  10  213.21   31.91
  -2  -5  10  276.10   34.85
  -2   5   9  301.40   28.03
   2  -5  -9  453.92   36.42
  -2  -5   9  293.90   32.14
  -2  -5   9  384.02   37.43
  -2   5   8 2196.78  110.11
   2  -5  -8 3599.34  171.59
  -2  -5   8 2286.84  118.67
  -2  -5   8 2678.25  135.73
  -2   5   7  320.87   26.69
   2  -5  -7  476.30   35.06
  -2  -5   7  269.15   26.71
   2  -5  -7  304.92   22.99
  -2  -5   7  353.68   30.46
  -2   5   6  333.76   26.26
   2  -5  -6  371.29   28.23
  -2  -5   6  299.09   28.93
   2  -5  -6  328.46   24.72
  -2  -5   6  348.15   29.50
  -2   5   5   25.05   10.03
   2  -5  -5   33.74    6.60
  -2  -5   5   29.22   13.20
   2  -5  -5   13.16    5.30
   2  -5  -5   20.54    6.35
  -2  -5   5   13.59   11.24
  -2   5   4 3599.27  192.64
  -2  -5   4 3754.13  204.63
   2  -5  -4 4148.78  220.84
   2  -5  -4 3769.85  201.04
   2  -5  -4 4424.24  235.54
  -2  -5   4 4263.24  228.26
  -2   5   3  227.16   19.27
   2  -5  -3  219.92   17.86
  -2  -5   3  201.70   23.17
   2  -5  -3  190.81   16.06
   2  -5  -3  227.69   18.13
  -2  -5   3  239.76   19.67
  -2   5   2   56.18   11.92
   2   5  -2   50.24    8.63
   2  -5  -2   34.74    7.59
  -2  -5   2   57.14   12.98
   2  -5  -2   45.06    9.62
  -2  -5   2   58.98   11.48
   2   5  -1  500.78   34.10
   2  -5  -1  457.18   33.23
  -2  -5   1  558.84   37.60
  -2  -5   1  516.83   39.25
   2  -5  -1  496.94   35.49
  -2  -5   0 4635.20  239.10
  -2  -5   0 4544.97  229.81
  -2  -5   0 5329.17  269.04
   2  -5   0 4567.50  233.55
  -2   5  -1   88.55   15.00
  -2  -5  -1   83.82   14.58
  -2  -5  -1  101.99   13.45
  -2  -5  -1  111.56   14.48
   2  -5   1   96.61   14.48
  -2   5  -2   41.07   12.19
  -2  -5  -2   76.12   16.16
   2  -5   2   50.65   10.28
  -2   5  -3  846.24   58.81
  -2  -5  -3 1217.69   81.77
   2  -5   3  996.08   67.41
  -2   5  -4 4102.09  222.17
  -2  -5  -4 5376.88  287.07
   2  -5   4 4335.90  233.49
  -2   5  -5   84.05   18.78
  -2  -5  -5  124.74   14.94
   2  -5   5  114.15   15.79
  -2   5  -6  707.73   54.77
  -2  -5  -6 1123.07   80.05
   2  -5   6  782.27   59.15
  -2   5  -7  969.93   54.67
   2   5   7 1020.65   46.23
  -2  -5  -7 1556.42   76.19
   2  -5   7 1078.91   58.31
  -2  -5  -7 1062.18   47.94
  -2   5  -8 1724.67   93.29
   2   5   8 1859.10   89.94
  -2  -5  -8 2902.54  143.35
   2  -5   8 1995.92  104.46
  -2   5  -9   91.38   45.40
   2   5   9  129.42   12.76
  -2  -5  -9  203.26   22.78
   2  -5   9  120.20   16.11
  -2   5 -10  627.85   37.63
   2   5  10  678.42   28.15
  -2  -5 -10  930.66   38.32
   2  -5  10  697.88   38.66
  -2   5 -11   84.61   28.27
   2   5  11  129.28   15.67
  -2  -5 -11  190.32   22.94
   2  -5  11  172.76   27.31
  -2   5 -12  680.55   47.63
  -2  -5 -12 1067.97   60.37
   2  -5  12  876.54   58.87
  -2   5 -13   34.85   18.29
   2  -5  13   33.77   17.90
  -2   5 -14  834.86   72.31
   2  -5  14 1169.66   98.16
  -2   5 -15  200.34   36.78
   2  -5  15  271.79   43.43
  -2   5 -16  115.53   28.45
   2  -5  16  229.89   34.72
  -2   5 -17   59.46   23.19
   2  -5  17   36.54   28.83
  -2  -6  16   85.10   21.64
  -2  -6  16  120.16   24.74
  -2  -6  15   16.89   17.13
  -2  -6  14  143.25   28.37
  -2  -6  14  148.82   26.66
  -2  -6  13  587.64   49.60
  -2  -6  13  672.84   55.68
  -2   6  12  138.85   25.67
  -2  -6  12  110.78   23.50
  -2  -6  12  129.11   26.75
  -2   6  11  299.87   29.58
  -2  -6  11  253.67   32.29
  -2  -6  11  290.21   32.73
  -2   6  10  252.38   29.62
  -2  -6  10  206.55   31.37
  -2  -6  10  290.68   37.49
  -2   6   9  714.61   53.38
  -2  -6   9  615.07   51.74
  -2  -6   9  733.42   58.98
  -2   6   8   49.92    9.76
   2  -6  -8   65.33    9.01
  -2  -6   8   38.31   17.08
  -2  -6   8   62.15   15.81
  -2   6   7  585.42   26.75
   2  -6  -7  862.26   32.87
  -2  -6   7  666.90   38.16
  -2  -6   7  687.97   35.60
  -2   6   6 1538.44   81.37
   2  -6  -6 2099.24  107.86
  -2  -6   6 1682.96   94.81
  -2  -6   6 1841.67  100.23
  -2   6   5 1177.43   62.31
   2  -6  -5 1477.08   75.03
  -2  -6   5 1233.57   69.37
  -2  -6   5 1454.09   76.25
  -2   6   4   50.75    8.08
   2  -6  -4   67.21    8.67
  -2  -6   4   49.68   17.94
  -2  -6   4   62.53   10.13
   2  -6  -3 1187.90   59.19
  -2  -6   3 1088.31   58.21
  -2  -6   3 1282.46   63.06
  -2  -6   2 1004.71   40.59
   2  -6  -2  877.84   63.57
  -2  -6   2 1093.87   35.20
   2  -6  -2  867.44   62.29
   2  -6  -1  378.69   31.96
  -2  -6   1  398.00   34.08
  -2  -6   1  396.29   29.85
  -2  -6   1  443.80   33.23
   2  -6  -1  373.28   30.68
  -2  -6   0    9.15   11.92
   2  -6   0    6.89    6.00
  -2  -6   0    2.84    3.23
   2  -6   0    0.85    4.03
  -2  -6  -1 1354.14   69.23
   2  -6   1 1135.91   59.00
  -2  -6  -1 1296.62   58.88
  -2  -6  -1 1524.62   68.81
   2  -6   1 1288.25   64.23
  -2   6  -2 1445.48   74.72
  -2  -6  -2 1698.61   83.95
  -2  -6  -2 1921.87   84.38
   2  -6   2 1615.08   78.18
  -2   6  -3  165.53   19.58
  -2  -6  -3  192.60   19.35
   2  -6   3  189.94   18.89
  -2   6  -4  109.22   13.78
  -2  -6  -4  155.66   14.83
   2  -6   4  141.04   14.13
  -2   6  -5 1126.99   63.64
  -2  -6  -5 1555.28   81.62
   2  -6   5 1263.05   68.66
  -2   6  -6  750.83   50.68
  -2  -6  -6  965.26   79.02
   2  -6   6  727.40   63.89
  -2   6  -7   60.35   15.25
  -2  -6  -7   97.10   13.21
   2  -6   7   83.27   13.69
  -2   6  -8  236.08   33.13
  -2  -6  -8  271.31   30.47
   2  -6   8  202.13   26.40
  -2   6  -9 1239.67   95.19
  -2  -6  -9 2374.28  166.31
   2  -6   9 1626.67  119.29
  -2   6 -10  206.38   37.32
  -2  -6 -10  332.17   38.36
   2  -6  10  211.37   30.85
  -2  -6 -11    9.86    9.48
   2  -6  11    7.65    6.82
  -2   6 -12  379.88   48.24
   2  -6  12  395.11   47.72
  -2   6 -13  459.92   58.56
   2  -6  13  509.15   67.41
  -2   6 -14   80.94   22.10
   2  -6  14  112.77   24.82
  -2   6 -15  116.55   29.19
   2  -6  15  159.68   41.24
  -2  -7  14   91.90   27.79
  -2  -7  14   90.75   18.69
  -2  -7  13   19.07   16.11
  -2  -7  13    8.40    9.42
  -2  -7  12  427.90   49.03
  -2  -7  12  410.80   44.14
  -2  -7  11  485.11   47.53
  -2  -7  11  464.65   29.22
  -2  -7  10    9.21   20.13
  -2  -7  10   18.75    9.10
  -2  -7   9   88.15   22.54
  -2  -7   9   65.74   14.77
  -2   7   8  415.74   27.45
  -2  -7   8  322.75   41.81
  -2  -7   8  466.11   53.96
  -2   7   7 1385.63   98.55
   2  -7  -7 1904.83  133.17
  -2  -7   7 1326.21  100.20
  -2  -7   7 1524.93  110.64
  -2   7   6   38.47   10.17
   2  -7  -6   30.08    8.58
  -2  -7   6   14.84   13.38
  -2  -7   6   13.59    5.74
   2  -7  -5  661.07   50.15
  -2  -7   5  563.93   48.49
  -2  -7   5  682.83   52.41
  -2  -7   4  175.84   23.50
   2  -7  -4  179.51   22.17
  -2  -7   4  190.04   22.94
   2  -7  -4  146.95   16.77
  -2  -7   3  471.00   50.08
   2  -7  -3  571.19   28.91
  -2  -7   3  573.34   39.57
   2  -7  -3  494.32   35.30
  -2  -7   2  585.61   36.20
   2  -7  -2  642.76   32.62
  -2  -7   2  680.64   29.45
   2  -7  -2  562.11   26.39
   2  -7  -1  594.23   52.03
  -2  -7   1  674.54   59.15
  -2  -7   1  700.00   56.88
   2  -7  -1  575.99   49.32
   2  -7   0  800.22   48.94
  -2  -7   0  777.02   48.91
  -2  -7   0  936.58   49.78
   2  -7   0  788.71   45.87
  -2  -7  -1  721.87   63.73
   2  -7   1  619.54   56.20
  -2  -7  -1  747.25   58.81
   2  -7   1  643.04   54.17
  -2  -7  -2  336.09   38.55
   2  -7   2  231.14   27.36
   2  -7   2  282.38   31.29
  -2  -7  -3 1654.79   64.90
   2  -7   3 1376.52   57.61
   2  -7   3 1618.68   61.17
  -2  -7  -4  533.45   55.32
   2  -7   4  502.41   51.23
  -2   7  -5   22.26   15.20
  -2  -7  -5   27.11    6.18
   2  -7   5   18.02   10.15
  -2   7  -6  170.15   26.48
  -2  -7  -6  318.49   36.02
   2  -7   6  242.37   28.75
  -2   7  -7  623.19   57.03
  -2  -7  -7 1064.46   78.63
   2  -7   7  741.57   58.55
  -2   7  -8  137.50   23.61
  -2  -7  -8  204.86   27.48
   2  -7   8  164.01   24.79
  -2   7  -9   11.86    8.51
  -2  -7  -9   27.47    8.71
   2  -7   9    2.03    8.69
  -2   7 -10   92.80   24.70
  -2  -7 -10  147.85   25.88
   2  -7  10  106.99   28.06
  -2   7 -11 1044.24   87.34
   2  -7  11 1168.99   96.98
  -2   7 -12   12.50    5.90
   2  -7  12    8.07   11.56
  -2   7 -13   12.12    6.13
   2  -7  13   20.61   10.04
  -2   7 -14   59.29   26.81
   2  -7  14  110.34   25.52
  -2  -8  12  147.50   33.55
  -2  -8  12  169.32   29.23
  -2  -8  11    9.61   13.32
  -2  -8  11   15.55   21.76
  -2  -8  10  554.64   58.74
  -2  -8  10  703.96   69.08
  -2  -8   9   13.50    8.85
  -2  -8   9    7.89   10.81
  -2  -8   8  105.89   24.56
  -2  -8   8  141.81   24.40
  -2  -8   7    8.55   11.88
  -2  -8   7   12.48    4.05
  -2  -8   6 1261.45   86.78
  -2  -8   6 1297.35   84.42
   2  -8  -5   20.97    6.57
  -2  -8   5    2.45    6.61
  -2  -8   5    5.72    4.36
   2  -8  -4   13.01    8.02
  -2  -8   4   10.65   15.85
  -2  -8   4    0.41    4.67
  -2  -8   3   18.00   12.66
   2  -8  -3    9.21    6.36
   2  -8  -3    5.63    4.86
   2  -8  -2 1265.38   71.93
  -2  -8   2 1249.77   74.63
   2  -8  -2 1115.40   62.04
  -2  -8   1   88.21   18.20
   2  -8  -1   73.30   17.72
   2  -8  -1   68.58   15.79
  -2  -8   0  117.17   20.80
   2  -8   0  122.07   18.77
   2  -8   0   91.81   15.97
  -2  -8  -1   18.98   11.75
   2  -8   1   10.58    5.40
   2  -8   1    6.44    9.84
  -2  -8  -2 2459.35  132.50
   2  -8   2 1973.37  111.85
   2  -8   2 2194.62  117.49
  -2  -8  -3   37.43   12.30
   2  -8   3   25.68   19.79
   2  -8   3    4.47   11.45
  -2  -8  -4  156.28   22.94
   2  -8   4  158.26   24.33
   2  -8   4  142.48   23.46
  -2  -8  -5   98.04   17.08
   2  -8   5   80.95   19.46
   2  -8   5  106.64   23.12
  -2  -8  -6 1001.86   76.10
   2  -8   6  697.74   61.13
   2  -8   6  801.53   63.07
  -2  -8  -7    1.30    6.32
  -2  -8  -8  560.48   63.52
   2  -8   8  436.57   27.30
  -2   8  -9    9.09   12.09
   2  -8   9   12.72   12.03
  -2   8 -10  359.29   47.39
   2  -8  10  360.54   39.84
  -2   8 -11   13.42   16.19
   2  -8  11    8.35   14.36
  -2   8 -12  353.71   41.98
   2  -8  12  427.90   48.49
  -2  -9  10   17.02   13.36
  -2  -9  10    3.41    5.39
  -2  -9   9  111.91   26.79
  -2  -9   9   93.84   16.83
  -2  -9   8   57.81   19.84
  -2  -9   8   64.98   16.94
  -2  -9   7  647.66   59.44
  -2  -9   6    7.45   15.09
  -2  -9   5  646.68   57.00
   2  -9  -4   98.28   16.31
  -2  -9   4   68.56   18.29
   2  -9  -3  725.91   60.92
  -2  -9   3  587.50   53.60
   2  -9  -2    8.46    8.47
   2  -9  -1  441.65   40.82
  -2  -9   1  415.58   33.31
  -2  -9   0    2.43    4.06
   2  -9   0    3.47    4.68
  -2  -9  -1  148.01   25.85
   2  -9   1  158.24   24.85
   2  -9   2   14.15   12.44
   2  -9   2   11.28   14.15
  -2  -9  -3 1140.59   92.40
   2  -9   3  960.80   81.13
   2  -9   3  988.68   79.46
  -2  -9  -4   24.43   15.38
   2  -9   4   28.20   16.96
   2  -9   4   44.26   13.03
  -2  -9  -5   50.65   14.52
   2  -9   5   78.98   18.02
   2  -9   5   43.15   12.33
  -2  -9  -6   15.54   11.80
   2  -9   6   10.04    7.87
   2  -9   6   11.72   14.19
   2  -9   7  603.08   57.33
   2  -9   7  737.15   62.71
   2  -9   8    7.31   12.42
   2  -9   9   11.73   12.40
   2  -9   9   14.22   11.86
   2  -9  10   20.13   15.29
   2  -9  10   18.75   13.67
  -2 -10   6  393.67   44.24
  -2 -10   5  140.17   25.06
  -2 -10   4   19.07   16.48
  -2 -10   3   70.13   16.52
   2 -10  -2  564.43   63.56
  -2 -10   2  494.32   58.97
  -2 -10   1   11.41   13.30
  -2 -10   0   23.34   13.44
   2 -10   0    7.83    7.78
  -2 -10  -1  195.10   27.22
   2 -10   1  235.99   28.84
  -2 -10  -2  543.65   64.33
   2 -10   2  540.32   62.27
  -2 -10  -3   34.99   13.89
   2 -10   3   28.70   20.88
  -2 -10  -4   37.29   14.61
   2 -10   4   11.09    8.22
  -2 -10  -5  290.30   33.15
   2 -10   5  179.12   29.33
  -3   0  19  559.35   55.86
  -3   0  18    3.26    8.11
  -3   0  17  156.70   23.86
  -3   0  16    3.13    4.94
  -3   0  15   85.05   18.76
   3   0 -14    3.23    3.20
  -3   0  14    4.80    7.78
   3   0 -13 2282.77   76.19
  -3   0  13 2731.30   99.41
   3   0 -12    3.60    3.56
  -3   0  12    6.60    6.17
   3   0 -11 1630.99   76.69
  -3   0  11 1938.92   95.44
   3   0 -10    3.68    5.09
  -3   0  10    1.80    2.73
  -3   0   9 8809.91  448.73
  -3   0   8    3.68    5.73
  -3   0   8    2.21    5.13
  -3   0   8    4.01    8.89
  -3   0   7    6.07    5.11
  -3   0   7    4.76    3.75
  -3   0   7    4.86    9.82
  -3   0   6    2.59    5.49
  -3   0   6    4.88    4.78
  -3   0   6    3.05    6.65
  -3   0   4    5.14    2.84
  -3   0   4    3.85    6.49
   3   0  -4    2.00    4.97
  -3   0   3  821.95   59.91
   3   0  -3  776.86   56.70
  -3   0   3  773.14   57.66
   3   0  -3  844.78   63.56
  -3   0   2    6.76    5.47
   3   0  -2    4.09    3.55
   3   0  -2    1.63    4.84
   3   0   0    6.15    6.18
  -3   0   0    1.72    2.70
  -3   0   0    4.47    3.03
   3   0   0    0.59    2.65
   3   0   2    4.04    5.07
  -3   0  -2    3.24    4.49
  -3   0  -2    4.20    3.38
   3   0   2    3.18    2.77
   3   0   3  664.45   38.81
  -3   0  -3  546.77   32.50
   3   0   3  457.99   27.23
   3   0   3  424.83   25.70
   3   0   4    6.75    5.94
  -3   0  -4    8.97   10.78
   3   0   4   11.44    7.50
  -3   0  -4    3.31    5.97
  -3   0  -6    4.23    3.22
   3   0   6    5.66    6.22
  -3   0  -6    4.16    4.65
  -3   0  -7 4594.01  265.56
   3   0   7 3922.02  227.64
  -3   0  -8    5.64    6.42
   3   0   8    3.42    6.22
  -3   0  -9 3475.31  180.63
   3   0   9 3482.92  181.20
  -3   0 -10    8.44    7.10
   3   0  10    4.90    9.74
  -3   0 -11  851.20   63.01
   3   0  11  916.17   68.12
  -3   0 -12   10.71    7.78
   3   0  12   16.73    7.99
  -3   0 -13  440.28   46.93
   3   0  13  485.39   52.04
  -3   0 -14   11.13    7.99
   3   0  14   13.28    7.03
  -3   0 -15  145.31   21.20
   3   0  15  228.84   33.14
  -3   0 -16    6.28    4.84
   3   0  16    4.67   11.59
  -3   0 -17  782.90   57.90
   3   0  17 1061.57   79.26
  -3   0 -18    5.38    6.54
  -3   0 -19    5.74    5.19
   3   0  19   31.48   18.38
  -3   1  19   10.99   18.31
  -3  -1  19   17.18   16.52
  -3   1  18  886.67   74.29
  -3  -1  18  929.49   77.80
  -3   1  17   23.54   16.99
  -3  -1  17   20.75   14.84
  -3   1  16   19.11   14.44
  -3  -1  16   26.98   17.69
  -3  -1  16   18.13   14.59
  -3   1  15  104.81   20.55
  -3  -1  15   87.84   22.26
  -3   1  14  860.53   67.67
  -3  -1  14  884.37   69.81
   3   1 -13   85.63   13.48
  -3   1  13  109.26   20.64
  -3  -1  13   76.57   15.81
   3   1 -12  115.76   11.84
  -3   1  12  163.51   10.95
  -3   1  12  146.70   17.92
  -3  -1  12  116.69   13.93
   3   1 -11  799.91   58.31
  -3   1  11 1299.43   89.49
  -3   1  11  949.92   72.07
  -3  -1  11  961.02   71.99
   3   1 -10 2144.50  117.73
  -3   1  10 3020.02  160.82
  -3   1  10 2418.59  134.33
  -3  -1  10 2457.71  137.07
  -3   1   9  238.45   17.04
  -3   1   9  171.19   13.27
  -3   1   9  171.52   26.38
  -3  -1   9  213.81   20.77
  -3   1   8  980.03   71.35
  -3   1   8  792.00   57.78
  -3   1   8  865.50   67.40
  -3  -1   8  822.94   62.49
  -3  -1   8  784.06   59.28
  -3  -1   8  861.35   66.85
  -3   1   7  171.34   10.92
  -3   1   7  134.30    9.18
  -3   1   7  145.45   14.22
  -3  -1   7  115.31   10.79
  -3  -1   7  128.32   12.07
  -3  -1   7  175.40   17.42
  -3   1   6   99.79    6.43
  -3   1   6  103.86    6.92
  -3   1   6  113.12   12.25
  -3  -1   6   98.61   10.34
  -3  -1   6  102.61   11.17
  -3  -1   6  137.29   17.03
  -3   1   5 1230.18   90.87
  -3   1   5 1246.21   89.25
  -3  -1   5 1169.81   85.76
  -3  -1   5 1293.91   94.65
  -3  -1   5 1350.34   99.44
   3  -1  -5 1478.84  108.64
  -3   1   3 3480.99  250.07
   3   1  -3 3569.71  255.98
   3   1  -3 4181.47  299.77
   3  -1  -3 3867.40  277.52
  -3  -1   3 3550.26  254.69
   3   1  -1   36.78    5.52
  -3   1   1   43.09    5.12
  -3   1   1   39.36    7.81
   3   1  -1   35.25    4.85
  -3  -1   1   41.41    6.55
   3  -1  -1   44.03    6.18
   3  -1  -1   34.22    5.86
  -3  -1   1   27.41    6.64
  -3   1   0  199.23   17.93
   3   1   0  173.86   11.82
   3   1   0  171.05   12.44
  -3   1   0  138.79   12.46
  -3  -1   0  191.89   15.88
   3  -1   0  167.42   12.28
  -3  -1   0  164.76   11.13
   3  -1   0  225.64   14.93
  -3   1  -1 1126.76   82.17
   3   1   1  958.95   69.63
  -3   1  -1  887.65   65.40
   3   1   1 1154.71   84.63
   3  -1   1  928.09   68.33
  -3  -1  -1 1332.91   97.21
  -3  -1  -1  920.14   67.21
   3  -1   1 1353.45   98.50
  -3   1  -2 3255.15  233.81
   3   1   2 4024.89  288.53
   3  -1   2 3874.43  277.77
  -3  -1  -2 4256.70  305.05
   3  -1   2 2845.49  204.73
  -3  -1  -2 2747.30  196.70
   3  -1   2 2826.62  203.43
  -3   1  -3   15.83    6.90
   3   1   3    5.73    4.13
   3   1   3    5.47    2.17
   3   1   3   16.62    9.17
   3  -1   3    4.65    4.05
  -3  -1  -3    8.19    6.86
   3  -1   3    6.28    8.57
   3  -1   3    3.82    6.82
  -3   1  -4 7235.93  371.91
  -3   1  -5 1938.37  114.45
   3   1   5 2470.88  144.19
   3   1   5 1903.33  111.10
  -3   1  -5 1944.92  114.62
  -3  -1  -5 2527.23  147.56
  -3  -1  -5 1943.79  113.27
   3  -1   5 1882.63  111.56
  -3   1  -6 1736.92  103.57
   3   1   6 1818.34  107.16
  -3  -1  -6 2300.59  135.08
   3  -1   6 1605.60   96.19
  -3  -1  -6 1682.93   99.13
  -3   1  -7 2758.98  167.69
   3   1   7 3027.45  182.27
   3  -1   7 2814.68  171.03
  -3  -1  -7 2855.71  172.16
  -3   1  -8 1940.83  120.41
   3   1   8 1948.12  119.66
  -3  -1  -8 2180.64  133.63
   3  -1   8 1859.76  115.35
  -3   1  -9 1276.17   85.48
   3   1   9 1386.76   91.00
  -3  -1  -9 1561.58  102.17
   3  -1   9 1509.55   99.43
  -3   1 -10  177.85   19.09
   3   1  10  185.19   18.72
  -3  -1 -10  224.94   21.50
   3  -1  10  181.48   19.64
  -3   1 -11   50.95   13.14
   3   1  11   69.77   11.10
  -3  -1 -11   57.21   13.65
   3  -1  11   69.91   12.61
  -3   1 -12 2217.44  118.29
   3   1  12 2518.89  133.16
  -3  -1 -12 2508.47  131.47
   3  -1  12 2481.97  132.46
  -3   1 -13  310.10   36.87
   3   1  13  413.86   43.95
  -3  -1 -13  314.81   34.41
   3  -1  13  384.05   42.93
  -3   1 -14  289.51   33.86
   3   1  14  288.39   34.55
  -3  -1 -14  344.83   37.70
   3  -1  14  368.97   46.15
  -3   1 -15  168.34   25.00
   3   1  15  221.92   30.23
  -3  -1 -15  194.53   27.08
   3  -1  15  220.75   33.88
  -3   1 -16  963.45   74.73
   3   1  16 1179.98   89.62
  -3  -1 -16 1045.96   78.75
   3  -1  16 1206.04   96.02
  -3   1 -17   12.73   13.23
   3   1  17    9.91    8.89
  -3  -1 -17    5.72    5.65
   3  -1  17    7.09   14.44
  -3   1 -18  257.80   34.23
   3   1  18  384.49   37.86
  -3  -1 -18  304.73   38.78
   3  -1  18  377.31   40.87
  -3   1 -19   51.11   23.66
   3   1  19  107.73   32.84
   3  -1  19   73.05   81.67
  -3   2  19  248.28   40.41
  -3  -2  19  333.30   64.20
  -3   2  18   12.53   14.59
  -3  -2  18   11.56   17.29
  -3   2  17  303.15   43.04
  -3  -2  17  260.69   34.59
  -3  -2  17  324.05   44.67
  -3   2  16  686.66   37.76
  -3  -2  16  695.88   58.22
  -3  -2  16  651.61   72.75
  -3   2  15  284.59   31.37
  -3  -2  15  213.03   28.06
  -3  -2  15  267.63   34.72
  -3   2  14   15.75   16.40
  -3  -2  14   30.33   14.52
  -3   2  13 1135.76   50.61
  -3  -2  13 1025.39   50.06
  -3   2  12 1274.34   64.69
  -3   2  12 1386.38   79.13
  -3  -2  12 1371.06   78.40
  -3   2  11  469.17   30.17
  -3   2  11  355.04   23.10
  -3   2  11  366.79   33.71
  -3  -2  11  386.85   34.10
  -3   2  10  303.93   33.55
  -3   2  10  233.39   17.15
  -3   2  10  226.35   23.33
  -3  -2  10  225.95   22.67
  -3   2   9 3580.94  194.09
  -3  -2   9 3027.29  164.85
  -3  -2   9 3481.23  189.82
  -3   2   8  775.55   53.90
  -3  -2   8  756.46   52.48
  -3  -2   8  842.53   58.62
  -3   2   7    6.52    6.78
  -3  -2   7    6.56    5.61
  -3  -2   7   11.97    9.56
  -3   2   6  662.46   39.26
  -3  -2   6  664.09   39.30
  -3  -2   6  804.50   47.20
  -3   2   5 3257.82  189.28
  -3  -2   5 3034.73  176.54
  -3  -2   5 3633.81  210.71
  -3   2   4 2937.45  170.47
   3   2  -4 3612.92  208.81
  -3  -2   4 2735.25  159.24
  -3  -2   4 2936.03  170.65
  -3  -2   4 3367.81  194.97
   3  -2  -4 3468.34  200.61
  -3   2   3  386.06   21.60
   3   2  -3  468.94   28.47
   3   2  -3  389.29   24.91
  -3   2   3  383.77   24.63
  -3  -2   3  377.09   24.17
   3  -2  -3  448.50   27.82
  -3  -2   3  448.93   27.48
   3  -2  -3  519.04   28.52
  -3   2   2 1420.58  102.30
   3   2  -2 1839.69  132.90
   3   2  -2 1630.25  118.88
  -3   2   2 1441.78  105.13
  -3  -2   2 1573.54  114.81
   3  -2  -2 1642.17  119.43
  -3  -2   2 1686.32  122.27
   3  -2  -2 1944.20  139.51
  -3   2   1 1897.72  136.58
   3   2  -1 2400.60  172.36
  -3   2   1 1935.37  140.19
   3   2  -1 2121.40  153.73
   3  -2  -1 2051.69  148.52
  -3  -2   1 2050.81  148.78
  -3  -2   1 2159.19  155.20
   3  -2  -1 2406.70  172.84
   3   2   0 4498.52  322.60
  -3   2   0 3871.90  277.97
  -3  -2   0 4690.22  336.25
   3  -2   0 4102.57  294.23
  -3   2  -1 1086.23   79.76
   3   2   1 1290.83   92.76
   3   2   1 1317.56   96.61
  -3   2  -1 1007.29   74.49
  -3  -2  -1 1379.84  101.21
   3  -2   1 1168.26   85.78
  -3  -2  -1 1120.91   80.66
   3  -2   1 1295.55  136.62
  -3   2  -2 2511.79  181.35
   3   2   2 3170.07  228.41
   3  -2   2 3011.18  216.76
  -3  -2  -2 3355.25  241.43
   3  -2   2 2624.40  189.51
   3  -2   2 2464.62  178.25
   3  -2   3 6404.73  458.47
   3  -2   3 5167.06  370.60
  -3   2  -4 2231.95  131.36
   3   2   4 2526.75  145.13
   3   2   4 3062.73  177.94
   3   2   4 2268.64  130.49
  -3  -2  -4 3485.99  201.78
   3  -2   4 2341.75  137.29
  -3   2  -5 3365.38  196.04
   3   2   5 4662.05  268.63
  -3  -2  -5 5246.15  302.00
  -3  -2  -5 3651.79  209.46
   3  -2   5 3549.91  206.34
  -3   2  -6 1591.04   96.14
   3   2   6 1640.77   95.99
  -3  -2  -6 2416.40  141.92
   3  -2   6 1602.68   96.57
  -3  -2  -6 1645.84   96.27
  -3   2  -7 1173.58   88.51
   3   2   7 1517.03   92.89
  -3  -2  -7 1790.34  131.42
   3  -2   7 1378.04   87.42
  -3  -2  -7 1418.51   87.17
  -3   2  -8   20.27   13.89
   3   2   8   25.64    7.01
  -3  -2  -8   16.70    7.23
   3  -2   8   15.65    7.20
  -3  -2  -8   20.12    6.59
  -3   2  -9 1053.74   63.20
   3   2   9 1170.18   85.16
  -3  -2  -9 1482.65   31.60
   3  -2   9 1146.16   68.39
  -3   2 -10  753.95   57.36
   3   2  10  884.29   63.81
  -3  -2 -10 1057.63   76.45
   3  -2  10  874.46   65.63
  -3   2 -11  199.29   20.91
   3   2  11  290.63   25.88
  -3  -2 -11  248.49   26.04
   3  -2  11  258.48   35.16
  -3   2 -12  223.16   24.53
   3   2  12  271.43   27.64
  -3  -2 -12  238.16   26.62
   3  -2  12  248.45   30.71
  -3   2 -13 1019.62   77.25
   3   2  13 1188.34   88.67
  -3  -2 -13 1103.80   80.73
   3  -2  13 1143.15   87.00
  -3   2 -14  944.67   77.35
   3   2  14 1125.00   83.97
  -3  -2 -14 1159.39   85.09
   3  -2  14 1164.43   93.23
  -3   2 -15   29.10   16.06
   3   2  15   62.91   18.31
  -3  -2 -15   38.43    9.21
   3  -2  15   39.01   21.59
  -3   2 -16   45.22   13.36
   3   2  16   77.18   18.29
  -3  -2 -16   89.32   17.06
   3  -2  16   86.41   19.01
  -3   2 -17  429.19   44.34
   3   2  17  437.16   53.53
   3  -2  17  544.99   56.65
  -3   2 -18   97.09   19.97
   3   2  18   76.44   19.88
   3  -2  18  112.96   21.63
  -3   3  18  134.05   20.58
  -3  -3  18  111.01   26.81
  -3  -3  18  119.07   26.14
  -3   3  17  409.57   44.49
  -3  -3  17  414.30   46.72
  -3  -3  17  445.06   48.33
  -3   3  16   16.06   13.89
  -3  -3  16   10.24   13.42
  -3  -3  16   14.27   10.33
  -3   3  15 1424.14  106.87
  -3  -3  15 1222.99   92.59
  -3  -3  15 1435.73  111.25
  -3   3  14  504.34   37.91
  -3  -3  14  472.08   37.99
  -3  -3  14  440.72   52.32
  -3   3  13  202.80   23.12
  -3  -3  13  136.67   20.68
  -3  -3  13  224.46   26.27
  -3   3  12  121.81   19.63
  -3  -3  12  100.94   21.35
  -3  -3  12  153.20   23.67
  -3   3  11 3472.67  179.41
  -3  -3  11 3147.84  165.63
  -3  -3  11 3607.18  188.43
  -3   3  10  601.43   44.35
  -3  -3  10  524.33   39.71
  -3  -3  10  648.90   47.80
  -3   3   9   60.29    9.78
  -3  -3   9   46.00   13.05
  -3  -3   9   44.88   14.18
  -3   3   8  149.43   15.93
  -3  -3   8   96.54   13.61
  -3  -3   8  129.18   20.94
  -3   3   7 3065.89  159.68
  -3  -3   7 2703.87  142.32
  -3  -3   7 3207.14  167.51
  -3   3   6  291.68   24.88
  -3  -3   6  288.09   26.18
  -3  -3   6  345.75   29.75
  -3   3   5   66.98   10.02
  -3  -3   5   74.75    9.67
  -3  -3   5   72.42    8.26
   3   3  -4 1553.17   92.56
  -3   3   4 1273.32   76.60
  -3  -3   4 1241.03   75.89
   3  -3  -4 1373.10   79.30
   3  -3  -4 1530.74   91.15
  -3  -3   4 1523.82   91.16
   3  -3  -4 1550.38   89.36
  -3   3   3 3845.68  222.39
   3   3  -3 4638.72  266.71
   3  -3  -3 4511.02  257.82
  -3  -3   3 3823.18  221.85
   3  -3  -3 4239.96  244.41
  -3  -3   3 4513.80  259.62
  -3   3   2   81.32    7.01
   3   3  -2   96.75    8.61
   3  -3  -2  110.72   38.36
   3  -3  -2   92.87    9.82
  -3  -3   2   91.12   10.03
  -3  -3   2   98.50   12.56
  -3   3   1 2933.19  169.31
  -3   3   1 2802.72  162.92
   3   3  -1 3459.28  198.47
   3  -3  -1 3431.60  197.77
  -3  -3   1 3195.83  185.94
   3  -3  -1 3214.61  186.19
  -3  -3   1 3479.01  199.58
  -3   3   0 2104.86  122.74
  -3   3   0 2201.02  128.90
   3   3   0 2615.37  149.93
   3  -3   0 2517.22  173.42
   3  -3   0 2255.77  131.96
  -3  -3   0 2526.65  144.92
  -3   3  -2 3226.66  187.46
  -3  -3  -2 4084.67  236.13
   3  -3   2 3305.75  191.91
  -3   3  -3 1475.38   89.07
  -3  -3  -3 1926.44  114.06
   3  -3   3 1406.24   84.88
  -3   3  -4  800.65   87.99
   3   3   4  863.35   44.83
   3   3   4  944.67   48.88
  -3  -3  -4 1125.07   62.39
   3  -3   4  845.56   49.35
  -3   3  -5 3906.23  235.83
  -3  -3  -5 5912.22  352.74
   3  -3   5 4113.08  247.77
  -3   3  -6  214.01   76.78
   3   3   6  244.95    8.85
  -3  -3  -6  292.12   18.01
   3  -3   6  220.79   14.62
  -3  -3  -6  209.84    8.30
  -3   3  -7 2042.49  129.36
   3   3   7 2574.15  131.99
  -3  -3  -7 3156.17  163.76
   3  -3   7 2133.25  114.44
  -3  -3  -7 2211.20  113.76
  -3   3  -8 1922.38  110.85
   3   3   8 2544.63  137.09
  -3  -3  -8 3067.96  166.26
   3  -3   8 2221.50  125.05
  -3  -3  -8 2217.37  119.56
  -3   3  -9 1593.81   79.91
   3   3   9 1969.20   91.69
  -3  -3  -9 2354.33  110.22
   3  -3   9 1947.28   95.64
  -3  -3  -9 1835.55   85.72
  -3   3 -10  170.67   19.01
   3   3  10  196.44   18.03
  -3  -3 -10  265.76   22.68
   3  -3  10  159.28   22.02
  -3   3 -11 2079.07  112.91
   3   3  11 2570.61  133.25
  -3  -3 -11 2892.11  149.35
   3  -3  11 2367.21  127.04
  -3   3 -12  210.49   27.93
   3   3  12  198.85   25.22
  -3  -3 -12  230.90   26.38
   3  -3  12  189.08   34.58
  -3   3 -13  307.20   36.62
   3   3  13  397.14   42.60
  -3  -3 -13  441.55   46.61
   3  -3  13  425.66   48.99
  -3   3 -14  172.36   25.79
   3   3  14  146.56   19.94
  -3  -3 -14  199.89   27.37
   3  -3  14  166.09   27.67
  -3   3 -15 1110.53   87.09
   3   3  15 1367.35  100.63
  -3  -3 -15 1316.23   96.13
   3  -3  15 1381.43  105.73
  -3   3 -16  197.01   30.81
   3   3  16  291.13   37.83
   3  -3  16  200.01   39.77
  -3   3 -17    3.22    5.82
   3   3  17    6.10    6.92
   3  -3  17    9.73    7.18
  -3   3 -18   16.26    9.46
   3  -3  18   29.45   15.17
  -3   4  17   23.75   14.11
  -3  -4  17   13.92   12.18
  -3  -4  17   52.32   21.58
  -3   4  16  954.33   88.05
  -3  -4  16  847.25   80.15
  -3  -4  16 1049.36   96.27
  -3   4  15   31.78   17.54
  -3  -4  15   17.47   13.97
  -3  -4  15   43.60   24.56
  -3   4  14   10.38   13.63
  -3  -4  14   12.17   10.44
  -3  -4  14   12.59    8.51
  -3   4  13   11.44    6.23
  -3  -4  13   16.51   19.90
  -3  -4  13    7.13    8.60
  -3   4  12 1906.60  135.69
  -3  -4  12 1714.47  124.49
  -3  -4  12 2014.44  144.95
  -3   4  11    5.11    8.39
  -3  -4  11    6.05    7.80
  -3  -4  11   11.80   11.57
  -3   4  10  310.20   29.83
  -3  -4  10  269.21   28.50
  -3  -4  10  304.55   31.12
  -3   4   9   51.95   10.89
  -3  -4   9   33.82   10.43
  -3  -4   9   50.28   13.63
  -3   4   8 2987.78  138.15
  -3  -4   8 2827.91  133.55
  -3  -4   8 3234.11  150.95
  -3   4   7  145.27   16.29
  -3  -4   7  141.63   17.36
  -3  -4   7  163.28   18.94
  -3   4   6 1215.08   79.99
   3  -4  -6 1790.45  111.82
  -3  -4   6 1130.84   77.76
   3  -4  -6 1383.40   86.66
  -3  -4   6 1498.89   98.68
  -3   4   5   77.20   15.78
   3  -4  -5   87.89   11.75
  -3  -4   5   71.45   18.77
   3  -4  -5   74.42   10.37
  -3  -4   5   82.22   17.11
  -3   4   4 4529.92  271.21
  -3  -4   4 4824.90  290.55
   3  -4  -4 4876.09  289.48
   3  -4  -4 4990.73  296.25
  -3  -4   4 5625.36  335.78
   3   4  -3    2.92    3.90
  -3   4   3    3.29    6.06
  -3  -4   3    3.89    6.88
  -3  -4   3    5.51    5.55
   3  -4  -3    1.58    4.29
   3  -4  -2 7181.73  877.45
  -3  -4   2 6330.61  378.64
  -3   4   1  105.36   10.21
   3   4  -1  135.32    8.17
  -3   4   1  112.77   11.99
   3  -4  -1   93.81   37.29
  -3  -4   1  122.86    7.80
  -3  -4   1  108.60   11.98
  -3   4   0 1809.10  111.05
   3   4   0 2163.57  129.17
  -3   4   0 1900.47  116.72
  -3  -4   0 2313.67  137.91
  -3  -4   0 2034.55  125.53
  -3   4  -1 1588.40   98.42
   3   4   1 1766.13  104.75
  -3  -4  -1 1883.86  117.09
   3  -4   1 1700.35  105.00
  -3   4  -2 3241.83  196.01
  -3  -4  -2 4150.77  249.79
   3  -4   2 3448.41  207.86
  -3   4  -3    3.51    2.36
  -3  -4  -3    8.53    5.28
   3  -4   3    4.26    3.70
  -3   4  -4   28.82    8.55
  -3  -4  -4   38.12    7.86
   3  -4   4   49.73   11.78
  -3   4  -5  118.96   24.69
  -3  -4  -5  166.13   23.72
   3  -4   5  127.97   20.20
  -3   4  -6 3774.05  197.24
   3   4   6 4093.04  205.83
   3   4   6 4274.07  214.87
  -3  -4  -6 6157.55  314.44
   3  -4   6 4035.05  210.10
  -3   4  -7   10.44    6.84
   3   4   7    9.73    3.03
  -3  -4  -7   17.06    8.24
   3  -4   7   17.52   27.57
  -3  -4  -7    5.21    2.51
  -3   4  -8   16.88   11.73
   3   4   8    6.12    3.35
  -3  -4  -8    8.95    9.03
   3  -4   8    6.69   10.77
  -3  -4  -8    0.34    1.72
  -3   4  -9   74.86   16.41
   3   4   9   75.68    6.98
  -3  -4  -9   83.94   11.75
   3  -4   9   82.72   17.40
  -3  -4  -9   69.69    7.74
  -3   4 -10 1232.35   73.04
   3   4  10 1558.27   81.59
  -3  -4 -10 2051.98  108.20
   3  -4  10 1411.41   80.51
  -3   4 -11   44.95   13.43
   3   4  11   30.88   10.46
  -3  -4 -11   41.72    9.51
   3  -4  11   34.10   19.93
  -3   4 -12   17.63    8.19
   3   4  12   39.01   11.55
  -3  -4 -12   44.40   11.75
   3  -4  12   29.16   17.38
  -3   4 -13   14.02   12.29
   3   4  13    9.94    7.76
  -3  -4 -13    7.06    5.03
   3  -4  13   12.75   11.00
  -3   4 -14  931.82   75.30
   3   4  14 1111.76   84.08
  -3  -4 -14 1093.01   81.23
   3  -4  14 1077.87   85.04
  -3   4 -15    9.25    8.43
   3   4  15   17.67   13.46
   3  -4  15   21.81   18.25
  -3   4 -16  177.07   30.35
   3  -4  16  197.45   36.33
  -3   4 -17   14.60    7.36
   3  -4  17   18.05   16.83
  -3  -5  17  165.95   31.22
  -3  -5  17  178.19   32.91
  -3   5  16   10.40    6.90
  -3  -5  16    7.24   12.88
  -3  -5  16   17.61    9.82
  -3   5  15  411.76   43.18
  -3  -5  15  386.34   46.56
  -3  -5  15  512.42   56.02
  -3   5  14  142.83   23.69
  -3  -5  14  131.97   23.93
  -3  -5  14  171.88   25.89
  -3   5  13   81.97   17.42
  -3  -5  13  133.34   31.65
  -3  -5  13  144.33   29.31
  -3   5  12   19.40   12.07
  -3  -5  12   18.61   11.92
  -3  -5  12   15.04   13.90
  -3   5  11  912.44   70.43
  -3  -5  11  941.75   79.72
  -3  -5  11 1170.96   90.06
  -3   5  10   19.85   13.14
  -3  -5  10   13.79    8.97
  -3  -5  10   11.32    7.68
  -3   5   9  238.67   26.12
  -3  -5   9  211.16   28.15
  -3  -5   9  276.87   32.33
  -3   5   8  182.94   19.16
  -3  -5   8  182.71   23.30
  -3  -5   8  182.00   21.06
  -3   5   7 1722.73   88.87
   3  -5  -7 2585.89  123.59
  -3  -5   7 1563.83   84.72
   3  -5  -7 1809.77   87.26
  -3  -5   7 1833.96   94.90
  -3   5   6  255.28   21.96
   3  -5  -6  334.15   24.84
  -3  -5   6  234.27   22.71
   3  -5  -6  247.96   18.88
  -3  -5   6  290.03   26.14
  -3   5   5    4.42    6.10
   3  -5  -5    3.72    3.41
  -3  -5   5    7.17   11.41
   3  -5  -5    3.42    3.62
  -3  -5   5    9.17    6.63
  -3   5   4  448.38   35.97
  -3  -5   4  493.11   41.03
   3  -5  -4  451.75   34.74
   3  -5  -4  416.31   42.79
  -3  -5   4  510.01   40.50
  -3   5   3 3598.49  193.61
   3  -5  -3 3721.41  198.72
  -3  -5   3 3839.38  208.88
   3  -5  -3 4137.05  220.42
  -3  -5   3 4417.29  235.45
   3   5  -2  404.40   28.85
  -3   5   2  395.45   29.81
  -3  -5   2  379.74   31.27
  -3  -5   2  444.99   30.89
   3  -5  -2  360.65   27.00
  -3   5   1    6.09    5.59
   3   5  -1    1.32    3.59
  -3  -5   1    8.50   13.10
  -3  -5   1    4.15    3.33
  -3   5   0   88.94   18.58
   3   5   0  109.61   15.31
  -3  -5   0  129.97   20.20
  -3  -5   0  120.75   15.84
   3  -5   0  115.02   18.53
  -3   5  -1 3304.32  172.17
  -3  -5  -1 4038.10  209.43
  -3  -5  -1 3983.47  200.19
   3  -5   1 3202.70  166.27
  -3   5  -2  351.43   27.94
  -3  -5  -2  405.59   31.91
   3  -5   2  360.18   28.34
  -3   5  -3  397.95   33.77
  -3  -5  -3  548.60   43.95
   3  -5   3  487.89   39.80
  -3   5  -4  191.45   20.48
  -3  -5  -4  271.85   25.56
   3  -5   4  184.89   19.18
  -3   5  -5 1056.32   68.48
  -3  -5  -5 1432.13  104.36
   3  -5   5 1127.06   67.13
  -3   5  -6    6.61    7.52
  -3  -5  -6   12.36    6.63
   3  -5   6   13.21    8.13
  -3   5  -7 1015.20   58.96
  -3  -5  -7 1760.03   91.64
   3  -5   7 1160.74   66.67
  -3   5  -8    1.20    6.53
   3   5   8    4.57    2.93
  -3  -5  -8   14.39    8.40
   3  -5   8    9.61   11.87
  -3   5  -9 1331.74   56.81
   3   5   9 1512.49   49.07
  -3  -5  -9 2178.09   76.91
   3  -5   9 1575.92   63.62
  -3   5 -10  117.08   30.02
   3   5  10  121.69   13.18
  -3  -5 -10  226.65   21.81
   3  -5  10  153.24   20.13
  -3   5 -11  833.61   67.98
  -3  -5 -11 1396.07  100.65
   3  -5  11 1003.68   79.22
  -3   5 -12   12.88    8.23
  -3  -5 -12   12.47    8.36
   3  -5  12   39.96   15.50
  -3   5 -13  248.80   37.70
  -3  -5 -13  388.70   43.11
   3  -5  13  315.47   41.52
  -3   5 -14   15.07   13.75
   3  -5  14   15.72    9.05
  -3   5 -15  764.20   73.64
   3  -5  15  840.17   80.78
  -3   5 -16   19.43   11.03
   3  -5  16   19.13   18.56
  -3  -6  15   45.18   21.70
  -3  -6  15   94.12   18.14
  -3  -6  14  112.79   26.41
  -3  -6  14   93.27   20.24
  -3   6  13  314.95   40.49
  -3  -6  13  281.66   42.32
  -3  -6  13  342.52   47.24
  -3   6  12  398.35   47.39
  -3  -6  12  446.11   52.92
  -3  -6  12  527.48   60.69
  -3   6  11   37.17   15.11
  -3  -6  11   39.80   18.56
  -3  -6  11   51.63   29.20
  -3   6  10  358.18   43.03
  -3  -6  10  325.09   50.94
  -3  -6  10  449.50   52.94
  -3   6   9  559.85   45.18
  -3  -6   9  639.21   56.00
  -3  -6   9  681.39   55.75
  -3   6   8 1517.30  108.18
  -3  -6   8 1440.17  106.13
  -3  -6   8 1637.32  117.51
  -3   6   7   47.47   11.19
   3  -6  -7   74.34    9.32
  -3  -6   7   52.64   18.72
  -3  -6   7   52.00   11.57
  -3   6   6  590.25   52.04
   3  -6  -6  760.12   61.55
  -3  -6   6  611.63   54.73
  -3  -6   6  663.24   56.34
  -3   6   5  731.64   42.67
   3  -6  -5  974.14   53.16
  -3  -6   5  868.70   53.92
  -3  -6   5  871.23   51.14
  -3   6   4  434.20   32.66
  -3  -6   4  539.12   41.95
   3  -6  -4  457.88   32.64
  -3  -6   4  500.84   36.29
  -3   6   3   44.76    8.31
  -3  -6   3   51.69   12.68
   3  -6  -3   34.27    7.23
  -3  -6   3   36.38    8.30
   3   6  -2 1080.47   52.61
   3  -6  -2 1011.79   35.76
  -3  -6   2 1197.63   57.75
  -3  -6   2 1101.57   60.10
   3  -6  -2 1044.12   53.54
   3   6  -1  933.29   65.39
  -3  -6   1  887.57   66.39
  -3  -6   1  968.15   67.83
   3  -6  -1  848.57   62.17
   3  -6  -1  900.28   33.60
  -3  -6   0  119.32   14.63
  -3  -6   0   92.14    6.76
  -3  -6   0  110.99    6.42
   3  -6   0   97.01   10.44
  -3   6  -1  152.16   24.30
  -3  -6  -1  181.53   20.62
  -3  -6  -1  156.64   11.33
  -3  -6  -1  172.42   12.52
   3  -6   1  159.01   17.77
  -3   6  -2 2464.20  117.68
  -3  -6  -2 3100.34  145.33
   3  -6   2 2814.13  131.59
  -3   6  -3  702.65   51.29
  -3  -6  -3  863.74   60.01
   3  -6   3  675.18   48.57
  -3   6  -4  117.99   15.59
  -3  -6  -4  165.08   18.81
   3  -6   4  137.85   14.63
  -3   6  -5  363.90   35.08
  -3  -6  -5  605.70   52.65
   3  -6   5  484.47   44.83
  -3   6  -6 1500.03   87.74
  -3  -6  -6 2131.54  113.41
   3  -6   6 1757.00   96.46
  -3   6  -7  265.46   38.11
  -3  -6  -7  454.03   47.61
   3  -6   7  258.73   30.24
  -3   6  -8   26.70   15.93
  -3  -6  -8   29.60    7.96
   3  -6   8   20.02   19.14
  -3   6  -9  667.04   55.29
  -3  -6  -9 1185.42   87.65
   3  -6   9  790.48   63.26
  -3   6 -10  779.28   51.64
  -3  -6 -10 1539.08   85.15
   3  -6  10 1056.74   67.23
  -3   6 -11  275.61   45.63
  -3  -6 -11  475.94   44.88
   3  -6  11  320.98   35.80
  -3   6 -12   70.90   27.85
   3  -6  12   72.39   20.96
  -3   6 -13  169.11   27.89
   3  -6  13  254.51   56.69
  -3   6 -14  231.45   35.40
   3  -6  14  241.14   38.79
  -3   6 -15    4.76    4.76
   3  -6  15   12.82   15.47
  -3  -7  14  489.28   49.90
  -3  -7  14  518.12   51.80
  -3  -7  13   40.53   13.71
  -3  -7  13   36.25   23.49
  -3  -7  12  111.51   27.60
  -3  -7  12  163.24   27.21
  -3  -7  11   81.60   26.91
  -3  -7  11  111.18   21.12
  -3  -7  10  358.85   44.12
  -3  -7  10  463.50   52.55
  -3   7   9    3.91    4.93
  -3  -7   9   12.05   16.02
  -3  -7   9    8.25    7.96
  -3   7   8  450.18   30.60
  -3  -7   8  374.37   49.10
  -3  -7   8  476.43   54.59
  -3   7   7  220.49   29.87
  -3  -7   7  238.70   33.03
  -3  -7   7  290.70   34.61
  -3   7   6 1241.83   89.72
   3  -7  -6 1594.92  111.95
  -3  -7   6 1193.19   91.26
  -3  -7   6 1522.67  110.37
  -3   7   5   34.85    9.84
   3  -7  -5   59.13    9.68
  -3  -7   5   61.48   15.84
  -3  -7   5   84.44   12.05
  -3  -7   4  180.58   22.36
   3  -7  -4  139.80   14.62
  -3  -7   4  185.59   17.21
   3  -7  -3  931.55   39.20
  -3  -7   3  842.83   42.36
  -3  -7   3  950.02   37.03
   3  -7  -3  736.62   33.67
   3  -7  -2  153.06   19.94
  -3  -7   2  190.47   25.96
  -3  -7   2  201.94   22.10
   3  -7  -2  220.90   24.78
   3  -7  -1   48.59   10.46
  -3  -7   1   52.39   17.42
  -3  -7   1   56.63    9.40
   3  -7  -1   38.52    8.89
   3  -7   0  971.18   42.95
   3  -7   0 1045.35   42.70
  -3  -7  -1  349.63   40.84
   3  -7   1  260.14   30.14
   3  -7   1  252.59   29.77
  -3  -7  -2  713.12   36.30
   3  -7   2  608.26   30.72
  -3   7  -3  128.67   21.29
  -3  -7  -3  134.05   18.81
   3  -7   3  121.01   14.65
  -3   7  -4 1350.16  103.10
  -3  -7  -4 1812.92  129.83
   3  -7   4 1468.90  106.84
  -3   7  -5  100.29   19.63
  -3  -7  -5  150.02   19.40
   3  -7   5  140.76   19.03
  -3   7  -6  142.75   22.55
  -3  -7  -6  223.46   27.16
   3  -7   6  175.50   23.91
  -3   7  -7   52.39   26.89
  -3  -7  -7   62.77   15.97
   3  -7   7   48.90   16.92
  -3   7  -8 1137.91   80.89
  -3  -7  -8 1807.04  113.85
   3  -7   8 1274.47   88.38
  -3   7  -9   32.51   16.74
  -3  -7  -9   35.23    8.51
   3  -7   9   14.92    9.28
  -3   7 -10    8.30    4.47
  -3  -7 -10   11.48    8.96
   3  -7  10   11.48   10.23
  -3   7 -11   95.90   23.79
   3  -7  11  133.73   26.65
  -3   7 -12  671.21   73.24
   3  -7  12  802.76   76.32
  -3   7 -13   22.38   17.65
   3  -7  13    9.66   11.28
  -3   7 -14  110.62   23.74
   3  -7  14  114.28   27.48
  -3  -8  12   25.55   25.59
  -3  -8  12   24.98   16.14
  -3  -8  11   26.52   22.20
  -3  -8  11   76.18   20.39
  -3  -8  10   18.95    7.74
  -3  -8  10   10.86   10.00
  -3  -8   9  809.22   63.64
  -3  -8   9  786.02   59.03
  -3  -8   8   13.59    4.63
  -3  -8   8    3.81    7.24
  -3  -8   7   27.35   16.98
  -3  -8   7   35.16    9.78
  -3  -8   6    8.80    5.32
  -3  -8   6    3.11    7.30
  -3  -8   5 1466.29   97.92
  -3  -8   5 1684.96  105.08
  -3  -8   4   16.63    7.12
   3  -8  -4   23.46    8.11
  -3  -8   4   11.37   11.91
   3  -8  -4   14.10   10.01
  -3  -8   3   74.95   24.99
   3  -8  -3   87.24   14.74
   3  -8  -3   72.68   11.96
  -3  -8   2   89.77   18.76
   3  -8  -2   62.29   13.09
   3  -8  -2   52.20   12.62
  -3  -8   1 1818.37  101.87
   3  -8  -1 1647.71   91.46
   3  -8  -1 1612.60   86.72
  -3  -8   0   15.01    9.23
   3  -8   0   10.50   11.45
  -3  -8  -1  155.42   26.97
   3  -8   1  139.60   21.75
   3  -8   1   84.01   15.13
  -3  -8  -2    7.16    9.57
   3  -8   2    4.91    6.16
   3  -8   2    7.97    7.61
  -3  -8  -3 1748.17   98.67
   3  -8   3 1336.82   79.66
   3  -8   3 1406.60   79.46
  -3  -8  -4   62.33   13.82
   3  -8   4   77.98   21.46
   3  -8   4   37.37   14.45
  -3  -8  -5  357.10   36.24
   3  -8   5  287.53   31.91
  -3   8  -6   96.72   28.99
  -3  -8  -6  168.01   30.35
   3  -8   6  147.87   27.16
  -3   8  -7  390.62   41.19
  -3  -8  -7  526.27   60.09
   3  -8   7  403.41   49.09
  -3   8  -8   18.74   18.80
  -3  -8  -8    2.63    5.93
   3  -8   8    9.29   13.88
  -3   8  -9  628.75   65.19
  -3  -8  -9 1189.70  104.41
   3  -8   9  807.09   76.60
  -3   8 -10    9.10   12.72
   3  -8  10    9.07   11.12
  -3   8 -11  185.96   32.41
   3  -8  11  181.02   28.66
  -3   8 -12    4.97    8.15
   3  -8  12    4.06    6.97
  -3  -9   9   15.87   15.59
  -3  -9   8  219.77   32.74
  -3  -9   7  119.99   23.69
  -3  -9   6  552.06   57.06
  -3  -9   5   30.78   24.48
  -3  -9   4  655.28   53.02
  -3  -9   3    7.55    7.35
   3  -9  -3   21.89   12.31
  -3  -9   2  237.31   33.39
   3  -9  -2  167.82   23.08
  -3  -9   1   58.19   24.22
   3  -9  -1   51.16   15.36
  -3  -9   0 1210.01   99.28
   3  -9   0 1167.19   93.69
  -3  -9  -1   59.94   16.11
   3  -9   1   47.85   11.94
   3  -9   1   46.48   12.78
  -3  -9  -2  255.69   34.41
   3  -9   2  197.10   31.10
   3  -9   2  189.63   26.15
  -3  -9  -3   17.44   15.51
   3  -9   3   11.42    6.11
   3  -9   3   16.23   13.11
  -3  -9  -4 1012.89   71.24
   3  -9   4  838.32   63.78
   3  -9   4  871.70   61.77
  -3  -9  -5    8.73    7.29
   3  -9   5    7.40   10.07
   3  -9   5    3.07    9.39
  -3  -9  -6    7.52    7.09
   3  -9   6    8.97   10.40
   3  -9   6   12.05    8.36
  -3  -9  -7   67.07   18.69
   3  -9   7   56.70   17.86
   3  -9   7   61.17   18.07
   3  -9   8  750.06   85.36
   3  -9   8  824.06   39.30
   3  -9   9   12.94    6.53
   3  -9   9   10.38   11.50
  -3 -10   5  525.35   53.11
  -3 -10   4   56.95   23.79
  -3 -10   3    7.19    7.96
  -3 -10   2  192.86   31.59
  -3 -10   1  393.60   51.21
   3 -10  -1  385.02   50.99
  -3 -10   0   33.83   23.37
   3 -10   0   56.97   13.48
  -3 -10  -1   33.85   16.96
   3 -10   1    5.74   10.44
  -3 -10  -2  255.75   35.89
   3 -10   2  208.04   26.35
  -3 -10  -3  479.74   57.51
   3 -10   3  308.80   41.21
  -3 -10  -4   12.80   15.44
   3 -10   4    7.93   10.73
  -3 -10  -5   74.04   25.81
   3 -10   5   53.03   22.98
  -4   0  19   13.93   13.65
  -4   0  18  220.49   34.57
  -4   0  17    6.01   14.23
  -4   0  16 1144.37   91.40
  -4   0  15    4.88    4.15
  -4   0  15   15.23   13.66
  -4   0  14  236.54   27.06
  -4   0  14  231.04   34.15
  -4   0  13    3.13    4.50
  -4   0  13    6.44    6.65
  -4   0  12 3123.96  158.45
  -4   0  12 3557.83  185.73
  -4   0  11    6.19    5.55
  -4   0  11    6.40    4.32
  -4   0  11    8.09    6.02
  -4   0  10   59.08    8.69
  -4   0  10   62.48   13.27
  -4   0  10   79.40   14.34
  -4   0   9    5.34    4.28
  -4   0   9    1.88    3.28
  -4   0   9    7.90    4.49
  -4   0   8  781.43   58.33
  -4   0   8  748.13   55.79
  -4   0   8  776.97   62.10
  -4   0   7    2.67    3.40
  -4   0   7    2.87    4.20
  -4   0   7   12.85    8.34
  -4   0   6  320.14   19.52
  -4   0   6  325.84   19.93
  -4   0   6  306.70   21.90
  -4   0   5    3.01    3.56
  -4   0   5    6.06    7.09
  -4   0   4 2754.54  197.71
   4   0  -4 2514.99  180.79
  -4   0   4 2575.24  186.44
   4   0  -4 2870.18  207.53
  -4   0   3   12.62   13.68
   4   0  -3    4.55    4.32
  -4   0   3    1.37    4.73
   4   0  -3    4.09    2.25
  -4   0   2 2119.80  152.82
   4   0  -2 1937.29  139.90
  -4   0   2 1601.51  116.79
   4   0  -2 1867.75  135.60
  -4   0   1    8.70    6.11
   4   0  -1    4.07    3.68
  -4   0   1    4.13    5.23
   4   0  -1    7.88    5.37
   4   0   0 3706.44  265.85
  -4   0   0 3458.24  248.22
  -4   0  -1    4.71    4.04
   4   0   1    5.02    3.48
  -4   0  -1    3.86    3.63
   4   0   1    3.70    3.01
  -4   0  -2  620.92   36.93
   4   0   2  681.45   40.05
  -4   0  -2  417.94   25.54
   4   0   2  417.50   25.73
   4   0   3    5.17    5.77
  -4   0  -3   19.08    7.65
   4   0   3    4.01    6.00
   4   0   3    3.11    2.56
   4   0   5    2.16    7.44
  -4   0  -5    8.00    6.54
  -4   0  -6  530.61   33.70
   4   0   6  421.13   26.61
  -4   0  -7   11.63   13.75
   4   0   7    2.51    3.21
  -4   0  -8 1535.51  100.77
   4   0   8 1408.76   92.36
  -4   0  -9    8.51    7.44
   4   0   9    2.70    4.87
  -4   0 -10  804.41   62.42
   4   0  10  907.13   68.97
  -4   0 -11    5.12    4.57
   4   0  11   10.11    4.47
  -4   0 -12  794.77   68.39
   4   0  12  829.13   51.49
   4   0  13    6.69    5.22
  -4   0 -14 1560.20  113.74
   4   0  14 1766.78  129.01
  -4   0 -15    7.16    3.12
   4   0  15   12.88    8.63
  -4   0 -16   74.83   17.16
   4   0  16   99.68   22.71
  -4   0 -17   10.04    8.72
   4   0  17    7.60   10.74
  -4   0 -18  809.96   65.89
   4   0  18  925.10   78.61
  -4   1  19   20.50   13.41
  -4  -1  19   19.92   14.11
  -4   1  18    9.59   13.40
  -4  -1  18   24.59   20.15
  -4   1  17  402.24   51.65
  -4  -1  17  483.99   63.62
  -4   1  16   17.92    8.77
  -4  -1  16   16.35   13.14
  -4  -1  16   29.21   10.62
  -4   1  15  339.44   37.90
  -4  -1  15  251.63   30.71
  -4  -1  15  261.24   31.17
  -4   1  14  139.27   26.93
  -4  -1  14  190.60   25.31
  -4  -1  14  178.84   26.58
  -4   1  13 1553.68   51.72
  -4   1  13 1769.56   73.42
  -4  -1  13 1521.45   57.86
  -4  -1  13 1644.40   72.45
  -4   1  12  203.87   18.43
  -4   1  12  241.50   28.27
  -4  -1  12  177.39   18.48
  -4  -1  12  213.43   28.47
  -4   1  11  276.87   20.03
  -4   1  11  263.99   24.46
  -4  -1  11  275.52   22.85
  -4  -1  11  276.51   27.32
  -4   1  10 1103.37   85.96
  -4   1  10  893.01   63.60
  -4   1  10  865.98   66.63
  -4  -1  10  845.99   62.94
  -4  -1  10  944.26   73.09
  -4   1   9  982.07   62.61
  -4   1   9  880.38   56.37
  -4   1   9  786.32   56.20
  -4  -1   9  774.26   52.34
  -4  -1   9  859.03   60.85
  -4   1   8  351.79   23.34
  -4   1   8  316.62   21.44
  -4   1   8  292.09   25.08
  -4  -1   8  280.33   21.79
  -4  -1   8  354.99   28.78
  -4   1   7 3015.76  183.23
  -4   1   7 3037.78  180.31
  -4  -1   7 2830.16  170.51
  -4  -1   7 2839.60  171.21
  -4  -1   7 3106.34  188.75
  -4   1   6   62.73    5.51
  -4   1   6   80.07    6.52
  -4   1   6   69.49   11.43
  -4  -1   6   58.26   11.22
  -4  -1   6   65.33    9.49
  -4  -1   6   72.76   11.92
  -4   1   5 4494.58  259.75
  -4  -1   5 4538.91  260.98
  -4  -1   5 4451.72  256.00
  -4  -1   5 4646.33  268.26
  -4   1   4  162.32   10.05
   4   1  -4  135.94   13.30
   4   1  -4  113.31    9.59
  -4   1   4  108.73   11.20
   4  -1  -4  109.49    7.29
  -4  -1   4  118.01   11.65
   4  -1  -4  143.40   12.46
  -4  -1   4  115.92    9.86
   4  -1  -3 9375.50  480.83
  -4   1   2  628.04   35.34
   4   1  -2  524.21   31.23
   4   1  -2  532.51   30.88
  -4   1   2  452.40   28.50
  -4  -1   2  512.06   30.91
  -4  -1   2  471.50   28.25
   4  -1  -2  497.38   30.82
   4  -1  -2  637.33   36.05
  -4   1   1 4396.92  315.34
  -4  -1   1 5825.25  416.76
   4  -1  -1 5112.69  366.24
  -4   1   0   47.42    6.86
   4   1   0   33.46    4.99
   4   1   0   45.91    6.69
  -4   1   0   40.76    6.84
  -4  -1   0   42.26    8.08
   4  -1   0   36.48    6.88
  -4  -1   0   39.30    6.55
   4  -1   0   64.37    8.24
  -4   1  -1 3810.30  273.65
   4   1   1 5386.42  385.71
  -4  -1  -1 5780.23  413.92
   4  -1   1 6344.57  453.58
   4  -1   1 4204.43  301.69
  -4  -1  -1 3812.73  273.00
  -4   1  -2 2308.69  167.12
   4   1   2 1950.56  140.64
   4   1   2 2733.69  197.34
  -4   1  -2 1851.69  134.57
  -4  -1  -2 2777.34  200.55
  -4  -1  -2 1888.96  136.34
   4  -1   2 1853.77  135.34
   4  -1   2 2754.37  198.63
  -4   1  -3 1035.46   77.14
   4   1   3  829.65   61.33
   4   1   3  846.18   62.30
   4   1   3 1322.83   97.40
   4  -1   3  908.61   68.00
   4  -1   3 1307.75   96.27
   4  -1   3  847.16   63.77
  -4  -1  -3 1330.21   99.13
  -4   1  -4 1475.38   88.48
   4   1   4 1381.05   81.39
   4   1   4 1444.76   85.01
  -4  -1  -4 2086.81  122.91
   4  -1   4 1347.89   80.78
  -4   1  -6 2424.12  143.07
   4   1   6 2295.52  134.37
  -4  -1  -6 3042.78  177.83
   4  -1   6 2306.72  136.15
  -4  -1  -6 2340.56  136.69
  -4   1  -7 1841.34  114.39
   4   1   7 1866.57  114.21
  -4  -1  -7 2284.69  140.31
   4  -1   7 1799.53  112.31
  -4   1  -8   57.23   14.60
   4   1   8   44.48   11.45
  -4  -1  -8   69.26   14.52
   4  -1   8   53.67   13.16
  -4   1  -9 3630.73  197.62
   4   1   9 3763.41  202.87
  -4  -1  -9 4334.12  233.97
   4  -1   9 3620.06  197.03
  -4   1 -10  203.52   22.57
   4   1  10  267.66   24.94
  -4  -1 -10  320.66   28.08
   4  -1  10  256.30   26.71
  -4   1 -11  109.44   16.29
   4   1  11  126.11   13.57
  -4  -1 -11  144.28   13.51
   4  -1  11  140.75   16.60
  -4   1 -12  517.49   46.30
   4   1  12  621.92   54.29
  -4  -1 -12  585.42   51.17
   4  -1  12  558.04   61.23
  -4   1 -13  478.56   41.26
   4   1  13  409.13   34.23
  -4  -1 -13  482.89   39.48
   4  -1  13  461.21   45.22
  -4   1 -14  290.52   35.26
   4   1  14  304.02   35.58
  -4  -1 -14  297.02   34.35
   4  -1  14  252.90   42.84
   4   1  15  241.77   28.24
  -4   1 -15  221.11   26.49
   4  -1  15  328.24   37.47
  -4  -1 -15  240.77   26.25
  -4   1 -16  153.97   25.56
   4   1  16  226.31   31.29
  -4  -1 -16  172.67   25.79
   4  -1  16  233.53   35.42
  -4   1 -17  376.13   41.09
   4   1  17  481.16   50.32
  -4  -1 -17  300.56   23.28
   4  -1  17  420.05   50.38
  -4   1 -18   10.13   12.62
   4   1  18    8.74    6.97
  -4  -1 -18    7.63    9.36
   4  -1  18    8.80   17.47
  -4   2  18  289.51   26.21
  -4  -2  18  408.47   53.17
  -4   2  17   28.52   12.11
  -4  -2  17   24.72   18.15
  -4  -2  17   15.15   10.11
  -4   2  16  571.57   55.06
  -4  -2  16  519.16   46.12
  -4  -2  16  543.79   52.36
  -4   2  15  247.26   28.84
  -4  -2  15  296.15   32.27
  -4  -2  15  276.95   38.58
  -4   2  14  271.64   40.07
  -4  -2  14  224.53   31.31
  -4  -2  14  284.18   35.50
  -4   2  13  445.39   65.69
  -4  -2  13  320.15   29.26
  -4  -2  13  443.48   40.51
  -4   2  12 1095.49   50.96
  -4  -2  12  972.45   41.49
  -4  -2  12 1108.49   49.22
  -4   2  11 1597.21   85.11
  -4  -2  11 1374.86   73.18
  -4  -2  11 1569.36   85.89
  -4   2  10  164.53   19.20
  -4  -2  10  126.59   13.48
  -4  -2  10  172.80   20.70
  -4   2   9 1608.88   92.82
  -4  -2   9 1483.46   84.03
  -4  -2   9 1721.72  100.27
  -4   2   8 2466.26  130.93
  -4  -2   8 2262.95  119.43
  -4  -2   8 2580.08  137.13
  -4   2   7  386.63   33.07
  -4  -2   7  372.74   31.27
  -4  -2   7  427.81   36.16
  -4   2   6   48.15   10.64
  -4  -2   6   52.98   11.46
  -4  -2   6   59.92   13.36
  -4   2   5 3441.98  200.20
  -4  -2   5 3423.37  198.89
  -4  -2   5 3737.32  216.88
  -4   2   4 5476.20  315.49
  -4  -2   4 5673.18  326.36
  -4  -2   4 6232.65  357.82
  -4   2   3 1624.45   93.87
  -4   2   3 1473.73   88.09
   4   2  -3 1672.01   99.02
   4   2  -3 1894.12  111.47
   4  -2  -3 2280.38  130.95
  -4  -2   3 1694.37   99.97
  -4  -2   3 1539.29   92.02
  -4   2   2   31.08    7.00
  -4   2   2   22.38    5.03
   4   2  -2   34.07    5.38
  -4  -2   2   19.48    8.95
   4  -2  -2   41.97    5.80
  -4  -2   2   30.04    6.74
   4  -2  -2   34.46    5.83
  -4   2   1 1275.77   92.73
   4   2  -1 1467.05  106.72
   4   2  -1 1329.73   97.94
  -4   2   1 1076.41   80.05
  -4  -2   1 1416.34  104.35
   4  -2  -1 1299.72   95.66
  -4  -2   1 1303.57   94.89
   4  -2  -1 1694.60  122.55
   4   2   0 7795.71  400.83
   4   2   1 3805.35  273.93
  -4   2  -1 3051.47  227.33
  -4   2  -1 2693.51  194.85
  -4  -2  -1 3766.10  271.12
   4  -2   1 3939.59  282.88
   4  -2   1 2859.33  206.57
  -4  -2  -1 2865.83  205.30
  -4   2  -2 2694.31  195.04
  -4   2  -2 2958.43  213.53
   4   2   2 3051.88  218.43
   4  -2   2 3801.88  273.45
  -4  -2  -2 2795.70  200.18
  -4  -2  -2 3845.31  276.85
  -4   2  -3 5069.15  292.07
  -4   2  -4 3581.06  208.24
   4   2   4 3347.75  192.12
  -4  -2  -4 5052.74  291.37
   4  -2   4 3254.25  189.76
   4   2   5  121.74   10.35
   4   2   5  146.46   10.79
  -4  -2  -5  191.81   17.03
   4  -2   5  148.37   13.87
  -4   2  -6 2318.86  142.48
   4   2   6 2480.10  149.26
  -4  -2  -6 3106.06  187.93
   4  -2   6 2300.33  141.61
  -4  -2  -6 2533.65  152.24
  -4   2  -7 3328.48  202.51
   4   2   7 3755.73  224.76
  -4  -2  -7 4832.26  290.07
   4  -2   7 3578.99  217.23
  -4  -2  -7 3335.90  200.01
  -4   2  -8 1627.44   89.58
   4   2   8 1763.84   93.52
  -4  -2  -8 2125.24  137.13
   4  -2   8 1596.59  142.54
  -4   2  -9   26.33    9.21
   4   2   9   22.23    9.94
  -4  -2  -9   46.42    9.57
   4  -2   9    6.86   11.80
  -4   2 -10 1112.55   59.20
   4   2  10 1236.70   62.07
  -4  -2 -10 1325.22   67.68
   4  -2  10 1180.43   63.23
  -4   2 -11 1696.07   92.34
   4   2  11 1894.96   98.31
  -4  -2 -11 2231.22  113.91
   4  -2  11 1751.15   98.61
  -4   2 -12   23.16   11.59
   4   2  12   11.35   10.77
  -4  -2 -12   18.78    7.17
   4  -2  12   18.02    9.14
  -4   2 -13   12.88   12.67
   4   2  13   11.59    8.69
  -4  -2 -13    9.03    6.09
   4  -2  13   46.23   18.94
  -4   2 -14 1077.93   66.79
   4   2  14 1294.41   75.26
  -4  -2 -14 1335.89   75.40
   4  -2  14 1162.66   74.40
  -4   2 -15  394.00   48.38
   4   2  15  435.11   49.51
  -4  -2 -15  465.55   50.94
   4  -2  15  360.16   44.40
  -4   2 -16   83.82   17.81
   4   2  16   77.63   21.21
  -4  -2 -16   66.96   14.55
   4  -2  16  121.20   26.11
   4   2  17  310.60   44.92
  -4   2 -17  227.61   35.54
   4  -2  17  257.66   43.95
  -4  -2 -17  248.57   36.91
  -4   2 -18  382.94   47.45
   4   2  18  492.88   61.58
   4  -2  18  536.61   63.31
  -4   3  18  487.39   49.64
  -4  -3  18  441.85   51.46
  -4   3  17  169.21   26.74
  -4  -3  17  231.08   31.52
  -4  -3  17  206.15   42.01
  -4   3  16  540.80   37.35
  -4  -3  16  514.50   62.22
  -4  -3  16  654.65   56.54
  -4  -3  15    9.86    7.06
  -4   3  14  906.28   66.09
  -4  -3  14  821.77   60.39
  -4  -3  14  952.06   68.86
  -4   3  13  558.72   47.59
  -4  -3  13  530.82   44.89
  -4  -3  13  653.38   54.93
  -4   3  12  801.62   43.31
  -4  -3  12  740.05   37.39
  -4  -3  12  851.43   41.87
  -4   3  11  202.42   27.81
  -4  -3  11  226.91   26.16
  -4  -3  11  240.04   26.81
  -4   3  10 2777.07  140.02
  -4  -3  10 2591.53  131.20
  -4  -3  10 2914.99  147.71
  -4   3   9  985.94   72.54
  -4  -3   9  928.03   68.80
  -4  -3   9 1076.71   40.74
  -4   3   8   19.35    8.17
  -4  -3   8   45.33   11.64
  -4  -3   8   44.82   10.34
  -4   3   7   78.69   14.50
  -4  -3   7   72.15   14.44
  -4  -3   7   78.22   14.89
  -4  -3   6 8380.32  426.25
  -4  -3   6 9570.74  824.17
  -4   3   5   57.65    7.73
   4  -3  -5   68.32    2.36
  -4  -3   5   67.51   17.15
  -4   3   4  114.20    6.00
  -4   3   4  143.11   10.86
   4  -3  -4  180.85    6.11
  -4  -3   4  124.82    9.78
   4   3  -3 6486.23  371.83
  -4   3   3 5046.03  291.00
  -4  -3   3 5993.38  343.88
  -4  -3   3 5511.91  318.19
  -4   3   1 1571.00   92.44
   4   3  -1 1956.55  113.91
  -4   3   1 1485.55   88.88
   4  -3  -1 1972.85  115.29
  -4  -3   1 1709.93   99.90
  -4  -3   1 1784.06  106.52
  -4   3   0 3353.61  194.05
  -4   3   0 3128.98  182.24
   4  -3   0 4154.21  239.32
  -4  -3   0 4003.48  232.56
  -4  -3   0 3552.00  203.51
  -4   3  -1  409.19   26.85
   4   3   1  446.02   24.48
  -4   3  -1  374.61   25.60
   4  -3   1  451.97   27.96
  -4  -3  -1  392.89   21.80
  -4  -3  -1  498.95   31.54
   4  -3   2 7174.90  412.17
  -4   3  -3   98.80   38.79
   4   3   3   91.82    7.07
   4  -3   3   72.20   10.57
  -4   3  -4 1693.12  110.42
   4   3   4 1913.33  113.89
   4   3   4 1927.27  114.79
  -4  -3  -4 2652.28  161.37
   4  -3   4 1774.02  110.58
  -4   3  -5 1034.90   79.34
   4   3   5 1093.89   79.25
   4   3   5 1120.88   81.18
  -4  -3  -5 1622.18  120.44
   4  -3   5 1087.97   82.80
  -4   3  -6 2682.35  141.60
   4   3   6 2805.28  142.93
   4   3   6 3167.37  161.15
  -4  -3  -6 4341.91  223.78
   4  -3   6 2924.91  154.08
  -4   3  -7   37.35   15.51
   4   3   7   39.55    7.59
  -4  -3  -7   26.61   15.20
   4  -3   7   33.60    5.93
  -4   3  -8 1497.11   87.40
   4   3   8 1892.84  103.27
  -4  -3  -8 2407.90  133.81
   4  -3   8 1602.46   92.78
  -4  -3  -8 1675.39   91.46
  -4   3  -9  549.02   45.57
   4   3   9  673.00   50.46
  -4  -3  -9  792.72   59.37
   4  -3   9  608.83   50.88
  -4  -3  -9  567.91   41.78
  -4   3 -10   33.53   15.44
   4   3  10   25.69    8.53
  -4  -3 -10   22.87   10.82
   4  -3  10   20.21   16.36
  -4   3 -11  284.05   29.88
   4   3  11  375.82   35.22
  -4  -3 -11  434.10   40.60
   4  -3  11  355.67   36.69
  -4   3 -12 2616.38  184.58
   4   3  12 3072.26  211.42
  -4  -3 -12 3671.60  501.84
   4  -3  12 3147.07  432.22
  -4   3 -13  376.01   45.86
   4   3  13  393.96   45.37
  -4  -3 -13  450.37   47.91
   4  -3  13  403.91   46.73
  -4   3 -14   56.61   18.07
   4   3  14   48.42   28.17
  -4  -3 -14   51.55   12.42
   4  -3  14   28.59   15.24
  -4   3 -15   26.87   14.87
   4   3  15   17.98   17.71
  -4  -3 -15   27.71    7.84
   4  -3  15   28.34   18.31
  -4   3 -16  848.01   66.65
   4   3  16  902.82   65.31
  -4  -3 -16  930.97   66.31
   4  -3  16  993.08   76.43
  -4   3 -17  104.06   25.41
   4  -3  17  188.66   29.42
  -4   3 -18    4.37    8.49
   4  -3  18    6.63    9.80
  -4   4  17    7.90   13.81
  -4  -4  17   17.21   11.27
  -4  -4  17   16.85   18.32
  -4   4  16   17.32   11.00
  -4  -4  16   12.04    8.20
  -4  -4  16   30.44   15.63
  -4   4  15  896.82   66.03
  -4  -4  15 1022.70   74.97
  -4  -4  15 1100.11   80.59
  -4   4  14   82.04   26.88
  -4  -4  14   97.38   24.22
  -4  -4  14  111.49   24.62
  -4   4  13  491.67   38.68
  -4  -4  13  625.48   45.05
  -4   4  12  169.85   23.96
  -4  -4  12  227.13   30.10
  -4  -4  12  278.83   37.57
  -4   4  11 1871.06  133.83
  -4  -4  11 1945.91  138.35
  -4  -4  11 2335.71  165.70
  -4   4  10   39.99   10.45
  -4  -4  10   19.23   12.39
  -4  -4  10   20.17   11.17
  -4   4   9  730.93   52.65
  -4  -4   9  777.66   55.97
  -4  -4   9  749.44   53.96
  -4   4   8    4.52    7.03
  -4  -4   8    7.92    7.99
  -4  -4   8   13.61    7.88
  -4   4   7 1439.27   81.94
  -4  -4   7 1469.72   85.33
  -4  -4   7 1733.41   98.13
  -4   4   6   10.42    7.38
   4  -4  -6   10.40    1.91
  -4  -4   6   24.30   11.27
  -4  -4   6   12.71    8.34
  -4   4   5 2847.32  148.74
   4  -4  -5 3133.21  158.64
  -4  -4   5 2973.45  156.60
   4  -4  -5 3953.82  199.67
  -4  -4   5 3369.90  174.80
  -4   4   4  199.28   19.38
  -4  -4   4  236.80   21.71
   4  -4  -4  220.50   16.07
   4  -4  -4  267.04   19.13
  -4  -4   4  262.94   21.21
  -4   4   3  453.37   35.24
   4   4  -3  619.05   47.68
  -4   4   3  487.97   39.57
   4  -4  -3  574.61   43.59
  -4  -4   3  553.99   43.03
  -4  -4   3  509.31   42.23
  -4   4   2   51.90    7.95
   4   4  -2   59.35    7.84
  -4   4   2   45.72   14.78
   4  -4  -2   62.06    6.77
  -4  -4   2   56.34    7.39
  -4  -4   2   45.25    9.78
  -4   4   1 3553.88  213.17
   4   4  -1 4214.21  250.78
  -4   4   1 3352.01  202.34
  -4  -4   1 4281.67  254.87
   4  -4  -1 4499.71  268.90
  -4   4   0  233.00   36.68
   4   4   0  350.45   27.02
  -4   4   0  336.59   28.64
  -4  -4   0  337.24   25.75
  -4  -4   0  350.12   32.22
  -4   4  -1  467.17   37.39
   4   4   1  593.48   43.21
  -4  -4  -1  638.23   51.78
  -4  -4  -1  539.40   39.36
   4  -4   1  480.65   39.37
  -4   4  -2   40.69    8.05
  -4  -4  -2   52.59   15.96
   4  -4   2   25.38    8.57
  -4   4  -3 3286.81  199.47
  -4  -4  -3 4651.80  279.87
   4  -4   3 3448.37  209.10
  -4   4  -4   13.66   12.75
  -4  -4  -4   31.43    8.89
   4  -4   4   39.32    8.43
  -4   4  -5   64.87   27.05
  -4  -4  -5  126.95   20.34
   4  -4   5   64.56   15.79
  -4   4  -6    5.53    7.24
   4   4   6    1.38    1.97
   4   4   6    3.15    2.28
  -4  -4  -6   10.42    9.76
   4  -4   6    6.19    7.40
  -4   4  -7 3380.67  157.99
   4   4   7 3859.85  170.36
   4   4   7 4372.85  192.66
  -4  -4  -7 5585.81  252.26
   4  -4   7 3909.35  181.12
  -4   4  -8  704.63   51.58
   4   4   8  725.78   47.03
   4   4   8  846.49   54.00
  -4  -4  -8 1179.40   79.93
   4  -4   8  751.06   54.96
  -4   4  -9   13.38    7.79
   4   4   9    8.53    5.76
  -4  -4  -9   14.91   12.44
   4  -4   9   14.89   10.05
  -4  -4  -9   14.10    5.16
  -4   4 -10   23.95   10.45
   4   4  10   11.00    5.56
  -4  -4 -10   51.87   11.92
   4  -4  10   48.59   12.57
  -4   4 -11 2526.15  179.17
   4   4  11 3184.35  217.14
  -4  -4 -11 3995.58  274.06
   4  -4  11 2880.20  202.59
  -4   4 -12   32.90   17.11
   4   4  12   47.01   19.93
  -4  -4 -12   93.14   19.15
   4  -4  12   78.30   18.81
  -4   4 -13  156.13   28.39
   4   4  13  257.52   26.14
  -4  -4 -13  272.26   30.93
   4  -4  13  186.93   31.37
  -4   4 -14    4.90    3.41
  -4  -4 -14    5.88    7.19
   4  -4  14   11.15   12.19
  -4   4 -15  938.54   69.58
  -4  -4 -15 1065.57   73.47
   4  -4  15  996.34   73.31
  -4   4 -16   38.42   16.28
   4  -4  16   70.93   25.27
  -4   4 -17  239.58   24.96
   4  -4  17  267.50   33.18
  -4   5  16  109.94   22.08
  -4  -5  16  120.62   20.37
  -4  -5  16  137.91   27.80
  -4   5  15   15.01   14.74
  -4  -5  15   16.96   21.58
  -4  -5  15   42.63   18.71
  -4   5  14  649.14   52.62
  -4  -5  14  570.28   47.29
  -4  -5  14  606.20   49.23
  -4   5  13   85.53   18.58
  -4  -5  13  100.04   21.98
  -4  -5  13   68.42   20.17
  -4   5  12   25.50   15.00
  -4  -5  12   12.28   14.00
  -4  -5  12   19.56    7.77
  -4   5  11   73.51   16.25
  -4  -5  11   94.46   22.55
  -4  -5  11   92.41   19.92
  -4   5  10 1098.42   80.50
  -4  -5  10 1170.51   88.23
  -4  -5  10 1225.40   90.98
  -4   5   9    7.15    5.60
  -4  -5   9    8.15    8.76
  -4  -5   9    6.97    8.15
  -4   5   8  148.95   18.40
  -4  -5   8  152.71   24.62
  -4  -5   8  183.92   21.35
  -4   5   7  179.16   20.78
   4  -5  -7  260.84   16.88
  -4  -5   7  207.15   31.87
   4  -5  -7  252.40   16.37
  -4  -5   7  230.46   22.12
  -4   5   6 2518.84  126.80
   4  -5  -6 3075.65  146.71
  -4  -5   6 2625.82  133.88
   4  -5  -6 3244.68  154.66
  -4  -5   6 3200.56  158.66
  -4   5   5   10.05   11.45
   4  -5  -5    8.93    7.01
  -4  -5   5    8.38    8.46
   4  -5  -5    2.52    4.13
  -4  -5   5    7.43    5.37
  -4   5   4   73.69   12.09
   4  -5  -4   65.08    9.01
  -4  -5   4   80.91   14.46
   4  -5  -4   62.85    8.32
  -4  -5   4   70.61   11.02
  -4   5   3  132.82   15.85
  -4  -5   3  118.28   18.01
   4  -5  -3  115.66   13.40
   4  -5  -3  156.89    9.53
  -4  -5   3  133.23   15.76
  -4   5   2 2454.81  133.35
   4   5  -2 2925.02  156.70
  -4   5   2 2426.50  133.16
  -4  -5   2 3042.82  162.93
  -4  -5   2 2749.62  151.99
  -4   5   1  147.01   15.17
   4   5  -1  194.85   16.29
  -4   5   1  157.41   16.88
  -4  -5   1  172.14   14.76
  -4  -5   1  157.37   15.12
  -4   5   0   63.92   10.59
   4   5   0   76.23    9.26
  -4  -5   0   63.87   17.17
  -4  -5   0   64.33    7.24
   4  -5   0   61.44    9.93
  -4   5  -1  114.09   18.48
  -4  -5  -1  129.12   17.90
  -4  -5  -1   92.47    8.52
   4  -5   1  112.20   16.09
  -4   5  -2 2469.76  136.48
  -4  -5  -2 3068.63  168.49
   4  -5   2 2499.37  137.75
  -4   5  -3   20.38   10.88
  -4  -5  -3   51.21   12.57
   4  -5   3   43.59   10.75
  -4   5  -4 1242.52   67.57
  -4  -5  -4 1633.36   80.51
   4  -5   4 1381.89   81.40
  -4   5  -5  138.86   17.26
  -4  -5  -5  171.26   13.38
   4  -5   5  146.83   21.26
  -4   5  -6  671.78   50.40
  -4  -5  -6 1129.81   75.44
   4  -5   6  789.50   56.21
  -4   5  -7  316.22   39.76
  -4  -5  -7  556.69   42.52
   4  -5   7  414.79   34.39
  -4   5  -8 1035.33   62.62
  -4  -5  -8 1622.91   88.58
   4  -5   8 1226.47   71.64
  -4   5  -9  227.78   30.05
  -4  -5  -9  392.24   41.87
   4  -5   9  285.74   33.93
  -4   5 -10  843.04   67.60
  -4  -5 -10 1369.56   99.42
   4  -5  10 1175.37   96.32
  -4   5 -11   31.79   16.96
  -4  -5 -11   21.79    8.65
   4  -5  11   22.59   10.38
  -4   5 -12  701.30   54.71
  -4  -5 -12 1026.46   68.12
   4  -5  12  710.54   53.94
  -4   5 -13  102.35   28.31
  -4  -5 -13  120.99   22.87
   4  -5  13  104.65   27.84
  -4   5 -14   11.46   13.42
   4  -5  14   14.83   13.63
  -4   5 -15   60.32   23.80
   4  -5  15   75.26   23.60
  -4   5 -16  410.42   52.25
   4  -5  16  588.39   72.47
  -4  -6  15  438.89   55.75
  -4  -6  15  445.95   54.51
  -4  -6  14   61.44   21.78
  -4  -6  14   69.49   20.80
  -4   6  13  119.16   18.52
  -4  -6  13   98.63   27.39
  -4  -6  13  122.21   31.54
  -4   6  12  227.13   30.29
  -4  -6  12  242.15   39.81
  -4  -6  12  244.09   33.46
  -4   6  11  358.85   41.55
  -4  -6  11  294.65   38.89
  -4  -6  11  414.02   48.41
  -4   6  10   18.58   15.09
  -4  -6  10   11.62   12.38
  -4  -6  10   13.85    9.87
  -4   6   9  132.50   18.38
  -4  -6   9  138.94   24.26
  -4  -6   9  130.01   28.64
  -4   6   8  857.97   68.75
  -4  -6   8  941.40   73.22
  -4  -6   8 1085.66   81.95
  -4   6   7  724.74   35.83
  -4  -6   7  714.96   38.20
  -4  -6   7  888.04   39.77
  -4   6   6   27.23    8.49
   4  -6  -6   37.05    7.92
  -4  -6   6   44.25   13.15
  -4  -6   6   17.31   12.12
  -4   6   5  578.70   50.38
   4  -6  -5  734.63   40.86
  -4  -6   5  671.62   59.39
  -4  -6   5  775.80   64.28
  -4   6   4  203.07   21.49
   4  -6  -4  230.89   21.64
  -4  -6   4  210.16   24.25
  -4  -6   4  246.74   23.51
  -4   6   3  154.96   17.24
   4  -6  -3  159.28   15.11
  -4  -6   3  162.64   19.79
  -4  -6   3  210.40   17.58
   4   6  -2   47.80    7.84
  -4   6   2   29.08   12.39
  -4  -6   2   38.82   12.52
  -4  -6   2   42.32    7.15
   4  -6  -2   39.55    8.52
  -4   6   1  880.81   29.30
   4   6  -1 1022.05   51.90
  -4  -6   1  949.46   67.30
  -4  -6   1 1085.70   55.07
   4  -6  -1  947.36   53.95
  -4   6   0  838.65   58.06
  -4  -6   0 1057.86   72.74
  -4  -6   0 1016.80   50.07
   4  -6   0  865.90   59.52
  -4   6  -1  181.23   18.77
  -4  -6  -1  221.83   22.46
   4  -6   1  182.92   18.54
  -4   6  -2   69.54   13.62
  -4  -6  -2   89.34   14.31
   4  -6   2   44.72    9.65
  -4   6  -3 1329.40   74.80
  -4  -6  -3 1753.30   92.93
   4  -6   3 1459.96   78.42
  -4   6  -4  321.39   32.47
  -4  -6  -4  429.44   40.27
   4  -6   4  349.34   35.08
  -4   6  -5   15.19   16.61
  -4  -6  -5   25.23    9.05
   4  -6   5   28.80    5.39
  -4   6  -6  158.53   41.17
  -4  -6  -6  320.83   37.26
   4  -6   6  201.53   24.08
  -4   6  -7  980.76   77.24
  -4  -6  -7 1569.87  112.91
   4  -6   7 1174.99   89.08
  -4   6  -8  186.33   30.59
  -4  -6  -8  333.95   38.41
   4  -6   8  202.12   27.64
  -4   6  -9   23.12   13.25
  -4  -6  -9   50.42   12.90
   4  -6   9   35.05   14.82
  -4   6 -10  142.24   22.73
  -4  -6 -10  246.05   28.14
   4  -6  10  172.48   25.50
  -4   6 -11  335.23   42.80
  -4  -6 -11  537.43   57.98
   4  -6  11  370.66   46.42
  -4   6 -12  128.49   28.42
  -4  -6 -12  166.49   26.66
   4  -6  12  162.76   30.08
  -4   6 -13  255.64   39.89
   4  -6  13  317.93   28.21
  -4   6 -14  161.75   29.00
   4  -6  14  220.56   39.88
  -4   6 -15  205.74   32.52
   4  -6  15  300.29   47.26
  -4  -7  14  157.80   26.24
  -4  -7  14  167.60   32.18
  -4  -7  13  428.81   54.82
  -4  -7  13  332.59   43.16
  -4  -7  12   21.03   15.88
  -4  -7  11   86.22   24.49
  -4  -7  11  105.02   19.03
  -4   7  10  111.98   19.19
  -4  -7  10  134.25   25.18
  -4  -7  10  118.91   21.10
  -4   7   9  841.05   66.77
  -4  -7   9  904.95   73.24
  -4  -7   9 1034.01   79.85
  -4   7   8    9.63    6.79
  -4  -7   8   17.48   17.36
  -4  -7   8   10.36   13.95
  -4   7   7  428.08   30.07
  -4  -7   7  455.55   40.26
  -4  -7   7  424.71   47.99
  -4   7   6  619.83   50.63
  -4  -7   6  703.10   58.19
  -4  -7   6  717.77   55.57
  -4   7   5  408.48   43.88
   4  -7  -5  379.94   39.05
  -4  -7   5  465.19   90.65
  -4  -7   5  470.30   48.19
  -4   7   4  236.44   22.64
   4  -7  -4  247.62   21.35
  -4  -7   4  230.50   32.89
  -4  -7   4  224.58   20.28
   4  -7  -3  554.98   42.82
  -4  -7   3  600.10   53.09
  -4  -7   3  624.91   46.26
   4  -7  -3  491.90   39.98
  -4  -7   2  969.08   46.60
   4  -7  -2  920.43   39.57
  -4  -7   2 1070.48   39.94
   4  -7  -2  942.82   39.78
  -4  -7   1  451.68   49.92
   4  -7  -1  402.95   42.42
  -4  -7   1  545.59   35.56
   4  -7  -1  445.12   45.97
  -4  -7   0   16.14   16.68
   4  -7   0   10.25    5.36
   4  -7   0    9.42    7.94
  -4   7  -1 1636.98   65.81
  -4  -7  -1 2103.61   81.78
   4  -7   1 1546.00   61.17
  -4   7  -2   69.83   15.40
  -4  -7  -2  105.00   20.15
   4  -7   2   91.42   17.23
  -4   7  -3   25.58   10.33
  -4  -7  -3   57.11   13.11
   4  -7   3   45.28   15.19
  -4   7  -4  306.96   30.08
  -4  -7  -4  396.10   36.73
   4  -7   4  316.67   30.76
  -4   7  -5 1280.73   98.65
  -4  -7  -5 1696.68  122.91
   4  -7   5 1366.54  102.43
  -4   7  -6   56.87   30.29
  -4  -7  -6   49.22   13.16
   4  -7   6   55.94   16.66
  -4   7  -7   14.25    8.22
  -4  -7  -7   13.96   11.50
   4  -7   7   13.57   12.66
  -4   7  -8  300.86   34.77
  -4  -7  -8  540.48   50.46
   4  -7   8  375.82   39.97
  -4   7  -9  957.59   77.47
  -4  -7  -9 1482.82  108.85
   4  -7   9 1022.47   81.78
  -4   7 -10   29.52   25.04
  -4  -7 -10   52.11   14.23
   4  -7  10   40.23   19.59
  -4   7 -11   29.00   22.19
  -4  -7 -11  109.60   18.98
   4  -7  11   60.58   14.13
  -4   7 -12  120.63   24.39
   4  -7  12  128.12   22.39
  -4   7 -13  332.68   46.84
   4  -7  13  478.67   58.29
  -4  -8  12  682.54   64.77
  -4  -8  12  725.74   67.83
  -4  -8  11   77.05   21.37
  -4  -8  11   21.23   14.65
  -4  -8  10    5.51   14.37
  -4  -8  10   14.05   13.09
  -4  -8   9    4.78   14.51
  -4  -8   9   21.65   11.72
  -4  -8   8 1359.68   95.65
  -4  -8   8 1567.04  102.16
  -4  -8   7   30.70   17.01
  -4  -8   7    7.26    8.11
  -4   8   6   54.20   16.88
  -4  -8   6   64.05   19.33
  -4  -8   6   44.25   10.67
  -4  -8   5    9.84   11.13
  -4  -8   5    2.68    5.98
   4  -8  -5    7.61    4.62
   4  -8  -4 1454.41   91.30
  -4  -8   4 1497.60  100.60
   4  -8  -4 1302.11   82.82
   4  -8  -3   11.23    6.84
  -4  -8   3   16.40    9.48
   4  -8  -3    6.56   10.04
  -4  -8   2  218.93   30.43
   4  -8  -2  199.02   23.57
   4  -8  -2  190.43   22.28
  -4  -8   1   37.52   15.24
   4  -8  -1   11.19    6.78
   4  -8  -1   19.21    7.32
  -4  -8   0 1779.37  100.74
   4  -8   0 1382.58   78.79
   4  -8   0 1547.97   85.10
  -4  -8  -1    8.87   10.29
   4  -8   1   42.54   22.67
   4  -8   1    6.90   10.32
  -4  -8  -2  507.17   49.36
   4  -8   2  360.31   37.16
   4  -8   2  415.60   39.41
  -4  -8  -3   31.85   13.88
   4  -8   3   47.27   12.61
  -4   8  -4  676.08   55.93
  -4  -8  -4 1076.25   74.56
   4  -8   4  752.92   53.83
  -4   8  -5   25.36   16.44
  -4  -8  -5   36.37   11.61
   4  -8   5   21.83   11.20
  -4   8  -6  557.79   54.72
  -4  -8  -6  900.80   36.57
   4  -8   6  790.53   63.48
  -4   8  -7   16.30   10.78
  -4  -8  -7   21.62   11.50
   4  -8   7   20.00   15.15
  -4   8  -8  323.39   45.13
  -4  -8  -8  543.32   63.77
   4  -8   8  356.99   46.05
  -4   8  -9    4.00    9.32
  -4  -8  -9    6.19    5.75
   4  -8   9    7.89    8.74
  -4   8 -10  630.96   58.65
   4  -8  10  749.59   66.13
  -4   8 -11   12.74   15.32
   4  -8  11   22.47   14.79
  -4  -9   9  495.85   53.37
  -4  -9   8   26.25   20.28
  -4  -9   7  401.54   47.43
  -4  -9   6   74.70   21.37
  -4  -9   5  315.82   40.52
  -4  -9   4    7.36   14.17
  -4  -9   3  639.12   57.24
  -4  -9   2   26.71   11.92
   4  -9  -2   21.78    6.74
  -4  -9   1  131.36   23.22
   4  -9  -1  131.03   20.83
  -4  -9   0   27.12   23.91
   4  -9   0   16.92   10.28
   4  -9   0    8.41    4.32
  -4  -9  -1 1621.95  114.39
   4  -9   1 1432.88   97.42
   4  -9   1 1428.28   93.71
  -4  -9  -2  143.17   26.23
   4  -9   2   90.09   18.44
   4  -9   2   87.57   15.23
  -4  -9  -3  149.13   24.02
   4  -9   3  115.34   23.04
   4  -9   3   92.57   16.11
  -4  -9  -4   48.53   16.46
   4  -9   4   20.09   13.42
   4  -9   4   39.10   14.01
  -4  -9  -5  973.58   88.41
   4  -9   5  638.10   68.19
   4  -9   5  739.98   69.19
  -4  -9  -6   11.43   10.06
   4  -9   6   13.18    9.84
  -4  -9  -7   10.30   12.36
   4  -9   7    5.02   10.18
  -4   9  -8   35.25   18.31
  -4  -9  -8   13.92    8.15
   4  -9   8   20.11   12.15
  -4   9  -9  566.62   58.93
   4  -9   9  539.36   55.00
  -4 -10   4  276.45   40.07
  -4 -10   3   28.82   21.47
  -4 -10   2   14.91   13.23
  -4 -10   1  195.64   26.89
  -4 -10   0  308.61   37.05
   4 -10   0  364.87   46.43
  -4 -10  -1  144.51   25.56
   4 -10   1  112.18   21.71
  -4 -10  -2  176.58   29.40
   4 -10   2  122.38   28.31
  -4 -10  -3  198.49   29.01
   4 -10   3  119.18   21.39
  -4 -10  -4  285.22   36.60
   4 -10   4  235.05   31.06
  -5   0  18   17.95   11.58
  -5   0  17   24.64   17.74
  -5   0  16   11.25   11.36
  -5   0  15 1356.84   91.94
  -5   0  14    1.63    5.74
  -5   0  14   11.67   12.13
  -5   0  13  170.19   16.97
  -5   0  13  224.60   24.91
  -5   0  12    2.78    5.57
  -5   0  12    8.97    8.88
  -5   0  11 1786.01   88.68
  -5   0  11 1687.18   84.09
  -5   0  10    4.66    4.95
  -5   0  10    4.52    7.62
  -5   0  10    2.56    8.38
  -5   0   9    3.15    3.01
  -5   0   9    9.86    8.13
  -5   0   9    9.76    6.89
  -5   0   8    6.12    6.29
  -5   0   8    9.84    3.30
  -5   0   8    5.88    5.41
  -5   0   7  382.25   30.08
  -5   0   7  406.90   31.81
  -5   0   7  349.03   31.31
  -5   0   6    7.85    5.55
  -5   0   6    3.19    5.57
  -5   0   6   10.32    6.80
  -5   0   5   64.91    8.63
   5   0  -5   68.92    7.71
  -5   0   5   66.11    8.63
  -5   0   4    3.74    2.97
   5   0  -4    3.14    6.63
  -5   0   4    6.99    5.03
   5   0  -3 5288.60  303.01
  -5   0   3 4380.36  252.84
  -5   0   2    7.35    2.98
   5   0  -2    6.86    4.44
   5   0  -2    7.34    8.13
  -5   0   2   12.00   11.42
  -5   0   1  180.71   13.82
   5   0  -1  175.96   14.23
  -5   0   1  111.44   11.38
   5   0  -1  118.94   10.97
  -5   0   0    4.49    3.93
   5   0   0    5.37    7.94
   5   0   0    5.44    6.90
  -5   0   0   10.67    6.95
  -5   0  -1 4241.42  304.43
   5   0   1 4801.47  344.25
  -5   0  -2    8.44    6.26
   5   0   2    8.55    5.79
  -5   0  -2    1.95    5.19
   5   0   2    3.47    5.64
  -5   0  -3 4605.01  265.18
   5   0   3 5030.35  289.27
   5   0   4    6.97    3.72
   5   0   4    5.05    7.86
   5   0   5 6814.72  391.20
  -5   0  -6    7.22    5.82
   5   0   6   10.34    5.36
  -5   0  -7 1509.74   95.50
   5   0   7 1221.33   91.88
  -5   0  -8    4.72    2.72
   5   0   8    4.84    3.58
  -5   0  -9  135.38   18.03
   5   0   9  129.42   22.66
  -5   0 -10    5.72    7.67
   5   0  10    8.48    7.93
  -5   0 -11 1817.63   95.65
   5   0  11 1704.95   89.97
  -5   0 -12    8.16    4.26
   5   0  12    7.33    7.03
  -5   0 -13  132.75   18.42
   5   0  13  180.83   25.88
  -5   0 -14    7.89    7.60
   5   0  14    7.39    6.57
  -5   0 -15  958.98   67.04
   5   0  15 1030.27   71.56
  -5   0 -16    3.75    5.29
   5   0  16   16.16    9.53
  -5   0 -17    5.57    6.64
   5   0  17   14.17   16.45
  -5   0 -18    6.68    4.36
   5   0  18    3.35    7.42
  -5   1  18    6.43    4.24
  -5  -1  18    3.69    8.84
  -5   1  17  103.85   26.64
  -5  -1  17   85.76   28.12
  -5   1  16  949.01   82.72
  -5  -1  16  981.81   84.34
  -5   1  15   22.61   14.23
  -5  -1  15   15.68    8.76
  -5  -1  15   20.33   17.15
  -5   1  14  437.22   51.84
  -5  -1  14  346.23   39.98
  -5  -1  14  441.20   63.89
  -5   1  13  118.77   23.89
  -5  -1  13  123.39   16.00
  -5  -1  13  139.17   27.58
  -5   1  12 2866.32   88.82
  -5   1  12 2586.00   95.44
  -5  -1  12 2608.32   87.47
  -5  -1  12 2822.96  106.04
  -5   1  11    5.34    8.43
  -5   1  11    2.45    4.86
  -5   1  11   15.23    8.88
  -5  -1  11    7.68    6.63
  -5  -1  11    9.63    5.94
  -5   1  10 1872.85   84.56
  -5   1  10 1777.45   80.37
  -5   1  10 1694.19   85.33
  -5  -1  10 1587.14   76.23
  -5  -1  10 1644.03   83.00
  -5   1   9  158.04   13.08
  -5   1   9  164.68    7.35
  -5   1   9  164.47   25.06
  -5  -1   9  137.34   11.17
  -5  -1   9  182.55   20.56
  -5   1   8  856.05   54.67
  -5   1   8 1036.45   65.95
  -5   1   8  909.79   62.70
  -5  -1   8  848.15   56.86
  -5  -1   8  858.08   60.25
  -5   1   7   38.23    4.03
  -5   1   7   52.23    4.69
  -5   1   7   49.29   14.82
  -5  -1   7   48.10    7.57
  -5  -1   7   34.53    5.62
  -5  -1   7   55.45    9.35
  -5   1   6 3705.38  224.08
  -5   1   6 3589.92  213.11
  -5  -1   6 3878.64  232.45
  -5  -1   6 3664.82  219.77
  -5  -1   6 3886.21  234.45
   5   1  -5 1969.09  115.93
  -5   1   5 1864.15  111.68
  -5  -1   5 2107.39  124.66
   5  -1  -5 1979.73  114.20
  -5  -1   5 2056.81  122.13
  -5   1   4 2014.08  116.61
  -5   1   4 1348.11   81.73
   5   1  -4 1478.85   87.64
  -5  -1   4 1567.37   92.81
   5  -1  -4 1587.69   92.26
  -5  -1   4 1403.87   84.48
  -5   1   3   91.93    7.87
  -5   1   3   82.63    9.98
   5   1  -3   84.34    8.52
   5   1  -3   87.92   10.07
   5  -1  -3   91.26    7.55
  -5  -1   3  102.41   10.29
  -5  -1   3   84.49   12.54
   5   1  -2 5751.64  330.05
  -5   1   2 4835.65  278.74
   5   1  -2 5909.48  339.04
  -5   1   1  127.69   10.72
   5   1  -1  128.32   11.35
   5   1  -1  120.40   10.63
  -5   1   1   75.47   11.99
  -5  -1   1  130.63   12.00
   5  -1  -1   97.64   13.07
  -5   1   0  961.22   72.04
   5   1   0  794.60   59.44
   5   1   0 1006.68   74.89
  -5   1   0  723.98   54.98
  -5  -1   0 1057.57   78.67
  -5  -1   0  767.60   57.25
   5  -1   0  793.40   59.79
   5  -1   0 1169.58   85.91
   5   1   1 2084.78  151.70
  -5   1  -1 1825.75  133.04
  -5   1  -1 1434.58  105.74
   5   1   1 1675.03  121.72
  -5  -1  -1 2110.33  153.56
   5  -1   1 2270.33  164.67
   5  -1   1 1568.98  114.95
  -5  -1  -1 1366.49   99.87
   5   1   2 4519.67  259.52
  -5   1  -2 4139.54  239.19
  -5  -1  -2 4139.66  237.96
   5  -1   2 7164.52  410.63
  -5   1  -3 3177.90  185.06
   5   1   3 2760.41  159.87
  -5  -1  -3 4107.95  237.87
  -5  -1  -3 2514.85  145.93
   5  -1   3 2595.25  152.18
  -5   1  -4   10.48   10.59
   5   1   4    7.44    7.42
   5   1   4   10.35    5.79
   5  -1   4    0.93    6.33
  -5   1  -5  577.64   36.41
   5   1   5  499.90   30.33
   5   1   5  554.24   32.57
   5  -1   5  495.36   32.74
  -5  -1  -5  786.02   50.00
  -5   1  -6 2861.38  174.46
   5   1   6 2758.08  166.71
  -5  -1  -6 3550.26  214.84
   5  -1   6 2683.66  163.68
  -5   1  -7  136.52   22.49
   5   1   7  137.32   20.27
  -5  -1  -7  153.59   23.61
   5  -1   7  134.11   21.27
  -5   1  -8   68.90   15.40
   5   1   8   46.47   10.26
  -5  -1  -8   70.60   13.46
   5  -1   8   58.52   15.27
  -5   1  -9  157.78   18.89
   5   1   9  154.03   15.84
  -5  -1  -9  231.72   25.73
   5  -1   9  149.39   21.94
  -5   1 -10 2314.99  111.53
   5   1  10 2409.84  113.66
  -5  -1 -10 2881.33  136.04
   5  -1  10 2378.85  114.35
  -5   1 -11   76.08   14.00
   5   1  11   78.50   15.75
  -5  -1 -11   70.60   19.04
   5  -1  11   84.87   17.37
  -5   1 -12  190.79   24.87
   5   1  12  236.86   27.70
  -5  -1 -12  226.68   28.72
   5  -1  12  162.92   29.32
  -5   1 -13  169.14   23.01
   5   1  13  156.60   19.15
  -5  -1 -13  167.34   21.46
   5  -1  13  180.77   26.40
  -5   1 -14 1217.04   72.90
   5   1  14 1467.22   85.69
  -5  -1 -14 1301.51   75.04
   5  -1  14 1319.81   80.84
  -5   1 -15    2.74    3.92
   5   1  15    9.95    9.73
  -5  -1 -15    7.40    6.78
   5  -1  15    8.94    9.45
   5   1  16  641.74   53.56
  -5   1 -16  562.62   45.50
   5  -1  16  619.00   50.95
  -5  -1 -16  540.04   43.36
  -5   1 -17   67.89   18.33
   5   1  17   93.76   25.64
  -5  -1 -17   70.54   16.65
   5  -1  17  138.73   25.86
  -5  -1 -18  220.73   27.50
   5  -1  18  277.11   34.72
  -5   2  18  226.48   33.04
  -5  -2  18  290.05   34.53
  -5   2  17   97.43   22.23
  -5  -2  17   89.58   23.47
  -5   2  16  119.12   25.07
  -5  -2  16  117.52   19.51
  -5  -2  16  159.54   20.83
  -5   2  15  476.47   54.91
  -5  -2  15  549.13   60.17
  -5  -2  15  482.14   57.72
  -5   2  14  852.64   56.54
  -5  -2  14  798.60   48.90
  -5  -2  14  832.50   55.14
  -5   2  13  255.48   31.61
  -5  -2  13  209.07   24.85
  -5  -2  13  225.90   30.09
  -5   2  12  112.40   18.94
  -5  -2  12   98.05   15.14
  -5  -2  12  134.99   20.19
  -5   2  11 1501.32   84.92
  -5  -2  11 1455.40   81.20
  -5  -2  11 1628.40   91.25
  -5   2  10 1050.63   62.19
  -5  -2  10 1022.73   56.36
  -5  -2  10 1159.38   66.04
  -5   2   9  218.13   24.69
  -5  -2   9  221.54   21.32
  -5  -2   9  210.73   22.72
  -5   2   8 2164.40  121.68
  -5  -2   8 2260.52  124.47
  -5  -2   8 2495.29  139.25
  -5   2   7 2174.52  116.43
  -5  -2   7 2085.00  111.85
  -5  -2   7 2277.97  121.57
  -5   2   6 2729.01  166.66
  -5  -2   6 2615.79  159.20
  -5  -2   6 2860.15  174.32
  -5   2   5  593.55   43.16
  -5   2   5  507.81   41.38
  -5  -2   5  531.16   42.30
   5  -2  -5  537.79   39.10
  -5  -2   5  518.72   41.79
  -5   2   4 2562.18  147.08
  -5   2   4 2189.48  129.78
  -5  -2   4 2545.93  149.34
  -5  -2   4 2426.64  142.63
  -5   2   2   14.32    6.61
   5   2  -2   22.37    5.43
  -5   2   2   19.23    9.70
   5  -2  -2   25.27    4.25
  -5  -2   2   25.65    5.81
  -5  -2   2   23.48   12.55
  -5   2   1   58.01    8.54
   5   2  -1   48.92    7.28
  -5   2   1   47.78   12.56
   5  -2  -1   56.98    8.30
  -5  -2   1   43.33    6.45
  -5  -2   1   66.10   12.84
  -5   2  -1 5415.54  311.28
   5   2   1 5647.75  323.09
  -5   2  -1 4730.37  273.26
  -5  -2  -1 7017.57  403.10
   5  -2   1 7291.67  417.72
  -5   2  -2  238.24   30.09
   5   2   2  261.81   16.95
  -5   2  -2  217.18   18.22
  -5  -2  -2  253.71   17.26
  -5  -2  -2  324.17   26.19
  -5   2  -3 2687.95  157.54
   5   2   3 2670.73  154.06
   5   2   3 2761.09  159.26
   5  -2   3 2492.92  147.00
  -5  -2  -3 3823.95  222.38
  -5   2  -4 2949.78  172.96
   5   2   4 2861.37  165.14
   5   2   4 2727.32  157.50
  -5  -2  -4 3985.41  231.68
   5  -2   4 2745.81  161.45
  -5   2  -5  821.21   63.65
   5   2   5  849.47   63.71
   5   2   5  867.61   65.73
  -5  -2  -5 1269.98   97.26
   5  -2   5  754.98   59.06
  -5   2  -6  325.80   29.52
   5   2   6  301.43   25.30
   5   2   6  284.44   36.91
  -5  -2  -6  431.25   36.58
   5  -2   6  306.85   28.43
  -5   2  -7 2004.83  108.76
   5   2   7 2092.29  109.36
   5   2   7 2114.68  110.90
  -5  -2  -7 2901.86  152.67
   5  -2   7 1935.35  104.82
  -5   2  -8 2893.95  160.03
   5   2   8 3426.40  184.30
  -5  -2  -8 4143.03  224.37
   5  -2   8 2779.96  154.62
  -5   2  -9  777.85   59.27
   5   2   9  783.04   57.58
  -5  -2  -9 1073.08   78.89
   5  -2   9  887.85   67.21
  -5   2 -10  164.19   19.21
   5   2  10  176.12   20.15
  -5  -2 -10  243.70   25.23
   5  -2  10  192.86   31.06
   5   2  11 1505.49   81.78
  -5  -2 -11 1691.18   92.93
   5  -2  11 1457.12   82.87
  -5   2 -12  676.30   38.09
   5   2  12  857.66   43.38
  -5  -2 -12  848.48   41.88
   5  -2  12  760.14   39.97
  -5   2 -13   48.34   13.38
   5   2  13   73.08   16.35
  -5  -2 -13   66.34   16.52
   5  -2  13   74.45   19.79
  -5   2 -14  395.56   40.43
   5   2  14  546.57   50.80
  -5  -2 -14  478.31   45.28
   5  -2  14  491.93   50.18
  -5   2 -15  810.92   69.25
   5   2  15  972.37   75.66
  -5  -2 -15  898.41   70.39
   5  -2  15  875.74   72.85
  -5   2 -16  296.29   41.27
   5   2  16  386.49   48.88
  -5  -2 -16  358.32   45.45
   5  -2  16  324.92   44.20
   5   2  17   16.92   10.80
  -5  -2 -17    9.37    8.83
  -5   2 -18  203.55   33.22
   5   2  18  299.32   36.77
   5  -2  18  403.67   46.39
  -5   3  18   16.48   13.30
  -5   3  17  575.69   52.82
  -5  -3  17  475.96   46.20
  -5  -3  17  634.12   69.31
  -5   3  16  110.99   25.93
  -5  -3  16  130.76   24.76
  -5  -3  16   96.71   30.25
  -5   3  15  178.28   28.72
  -5  -3  15  164.69   24.73
  -5  -3  15  161.51   27.56
  -5   3  14  140.54   26.83
  -5  -3  14  114.25   22.17
  -5  -3  14  136.86   30.92
  -5   3  13 1132.48   69.46
  -5  -3  13 1218.88   70.86
  -5  -3  13 1353.67   80.59
  -5   3  12   78.28   14.54
  -5  -3  12   92.30   18.32
  -5  -3  12  136.40   19.33
  -5   3  11   38.84   15.65
  -5  -3  11   12.46    6.76
  -5  -3  11   22.63    9.49
  -5   3  10  137.74   23.86
  -5  -3  10  126.99   16.94
  -5  -3  10  126.38   14.17
  -5   3   9 2819.93  142.00
  -5  -3   9 2872.29  144.21
  -5  -3   9 3218.53  161.51
  -5   3   8  100.72   14.10
  -5  -3   8  103.74   13.50
  -5  -3   8   94.40   14.48
  -5   3   7  727.62   56.52
  -5  -3   7  746.19   57.58
  -5  -3   7  719.10   55.88
  -5   3   6 1292.42   86.15
  -5  -3   6 1310.95   87.97
  -5  -3   6 1552.76  102.12
  -5   3   5 6611.41  337.73
  -5  -3   5 6933.44  354.06
  -5  -3   5 7374.36  375.18
  -5   3   4  377.30   28.50
  -5   3   4  433.16   35.84
   5  -3  -4  681.44   50.03
  -5  -3   4  449.38   37.41
  -5  -3   4  492.55   39.53
  -5   3   3  510.97   38.76
   5   3  -3  643.99   49.82
  -5   3   3  495.80   39.90
   5  -3  -3  719.08   53.37
  -5  -3   3  554.36   43.06
  -5  -3   3  518.41   42.54
  -5   3   2   85.84    7.03
   5   3  -2  125.13    8.59
  -5   3   2   88.36   16.75
  -5  -3   2  102.78    8.57
   5  -3  -2  143.98    8.78
  -5   3   1 3102.13  186.35
   5   3  -1 3905.40  232.98
  -5   3   1 2898.07  175.63
   5  -3  -1 4433.15  264.73
  -5  -3   1 3416.22  204.17
  -5  -3   1 3752.25  226.50
  -5   3   0  142.77   12.59
   5   3   0  194.22   13.62
  -5   3   0  146.46   13.74
   5  -3   0  208.90   15.11
  -5  -3   0  168.08   12.65
  -5  -3   0  190.75   17.58
  -5   3  -1 1109.12   82.72
   5   3   1 1408.14  102.08
  -5   3  -1 1022.88   77.40
  -5  -3  -1 1070.48   78.02
  -5  -3  -1 1509.94   94.72
  -5   3  -2 1274.38   80.38
   5   3   2 1498.30   90.25
  -5  -3  -2 1676.11  123.82
  -5  -3  -2 1225.17  150.32
  -5   3  -3  221.47   26.51
   5   3   3  251.16   31.58
   5   3   3  303.35   23.58
   5  -3   3  257.19   34.79
  -5  -3  -3  368.65   48.42
  -5   3  -4  668.53   52.75
   5   3   4  649.07   47.91
   5   3   4  679.19   49.98
  -5  -3  -4  928.87   71.14
   5  -3   4  606.42   49.36
  -5   3  -5 2392.83  129.06
   5   3   5 2568.99  131.00
   5   3   5 2644.32  134.95
  -5  -3  -5 3554.08  185.20
   5  -3   5 2320.37  125.20
  -5   3  -6  688.41   49.86
   5   3   6  742.86   48.49
   5   3   6  792.04   51.60
  -5  -3  -6 1078.55   73.27
   5  -3   6  770.24   55.74
  -5   3  -7 1254.83   75.06
   5   3   7 1292.01   71.26
   5   3   7 1484.87   81.71
  -5  -3  -7 1957.92  110.08
   5  -3   7 1357.42   80.57
  -5   3  -8   51.70   12.95
   5   3   8   40.62    7.38
   5   3   8   57.65    8.91
  -5  -3  -8   78.58   14.98
   5  -3   8   54.74   15.34
  -5   3  -9 1743.29   93.16
   5   3   9 1944.41   96.71
  -5  -3  -9 2609.39  131.52
   5  -3   9 1826.50   98.58
  -5   3 -10  154.00   22.32
   5   3  10  157.18   24.11
  -5  -3 -10  171.76   16.37
   5  -3  10  166.99   23.77
  -5   3 -11  418.89   46.34
   5   3  11  445.53   45.16
  -5  -3 -11  580.34   60.10
   5  -3  11  469.26   50.74
  -5   3 -12   93.65   22.17
   5   3  12  122.80   29.55
  -5  -3 -12  134.54   22.65
   5  -3  12   78.45   20.27
  -5   3 -13  867.02   57.37
   5   3  13 1055.12   60.84
  -5  -3 -13 1147.32   67.48
   5  -3  13 1036.33   64.17
  -5   3 -14  288.36   37.23
   5   3  14  332.21   40.54
  -5  -3 -14  424.56   48.82
   5  -3  14  349.35   42.66
  -5   3 -15   47.69   26.35
   5   3  15   71.72   19.21
  -5  -3 -15   95.23   17.29
   5  -3  15   95.10   30.02
  -5   3 -16    2.61    9.92
  -5  -3 -16    8.71    5.01
   5  -3  16   13.17    8.08
  -5   3 -17  689.07   77.72
   5  -3  17  826.91   92.38
  -5   4  17    4.76   10.63
  -5  -4  17   17.61   16.55
  -5  -4  17   16.18   13.71
  -5   4  16   15.57    5.58
  -5  -4  16   28.67   17.33
  -5  -4  16   23.40    8.55
  -5   4  15   17.83   19.94
  -5  -4  15   19.19   14.95
  -5  -4  15   13.38   18.46
  -5   4  14  748.87   63.43
  -5  -4  14  754.91   65.43
  -5  -4  14  859.05   75.88
  -5   4  13   10.45    8.97
  -5  -4  13   28.36    9.50
  -5  -4  13   48.02   15.19
  -5   4  12  497.77   35.68
  -5  -4  12  422.65   51.30
  -5  -4  12  452.60   53.80
  -5   4  11   54.90   17.88
  -5  -4  11   38.66   20.60
  -5  -4  11   67.02   18.46
  -5   4  10 1234.98   52.30
  -5  -4  10 1375.22   58.77
  -5  -4  10 1457.55   60.32
  -5   4   9  122.17   16.78
  -5  -4   9  129.19   18.87
  -5  -4   9  136.02   15.52
  -5   4   8  973.98   55.48
  -5  -4   8  959.19   55.75
  -5  -4   8 1170.70   64.64
  -5   4   7  105.77   37.75
  -5  -4   7  120.55   15.13
  -5  -4   7   97.25   11.17
  -5   4   6 1720.48   98.38
  -5  -4   6 1825.89  104.29
  -5  -4   6 2118.17  117.89
  -5   4   5   12.70    6.86
   5  -4  -5    6.79    3.03
  -5  -4   5   11.53    9.98
   5  -4  -5    1.49    3.34
  -5   4   4 3054.44  155.69
  -5   4   4 3194.89  166.72
   5  -4  -4 4555.86  230.79
  -5  -4   4 3380.63  177.80
  -5  -4   4 3551.19  183.37
  -5   4   3   37.68    7.03
  -5   4   3   49.10   12.06
   5  -4  -3   55.94    8.96
  -5  -4   3   40.45   12.62
  -5  -4   3   47.63   10.43
  -5   4   2  557.90   38.16
   5   4  -2  655.40   44.40
  -5   4   2  534.39   39.07
   5  -4  -2  751.85   50.40
  -5  -4   2  616.32   41.61
  -5  -4   2  568.59   41.93
  -5   4   1  263.19   20.79
   5   4  -1  323.31   23.47
  -5   4   1  265.39   22.47
  -5  -4   1  291.80   21.27
  -5  -4   1  329.08   28.72
  -5   4   0 5610.31  287.65
  -5  -4   0 6727.33  344.12
  -5  -4   0 6195.50  312.55
  -5   4  -1  689.92   48.56
   5   4   1  983.15   62.40
  -5   4  -1  711.19   50.16
  -5  -4  -1  780.68   49.84
  -5  -4  -1  948.16   65.64
  -5   4  -2  281.99   24.07
   5   4   2  382.42   24.71
  -5  -4  -2  436.35   34.27
   5  -4   2  316.35   25.63
  -5   4  -3  867.22   60.24
  -5  -4  -3 1177.67   79.33
   5  -4   3  947.98   65.25
  -5   4  -4 6579.19  351.16
  -5  -4  -4 9999.00  529.78
   5  -4   4 7138.89   77.73
  -5   4  -5    3.74    6.01
  -5  -4  -5   40.34   10.35
   5  -4   5   20.67    8.43
  -5   4  -6   39.91   16.68
   5   4   6   38.03    3.78
   5   4   6   42.02    3.47
  -5  -4  -6   52.78    9.33
   5  -4   6   39.94   10.42
  -5   4  -7   18.81    8.98
   5   4   7   24.66    4.96
   5   4   7   24.56    4.25
  -5  -4  -7   30.99    8.23
   5  -4   7    7.40   13.94
  -5   4  -8 2176.51  113.79
   5   4   8 2522.55  121.47
   5   4   8 2889.28  138.67
  -5  -4  -8 4015.33  197.69
   5  -4   8 2686.36  137.77
  -5   4  -9   13.71    9.25
   5   4   9   18.47    4.65
  -5  -4  -9   22.60   14.74
   5  -4   9    9.26    6.32
  -5   4 -10  668.11   36.68
   5   4  10  691.97   27.87
  -5  -4 -10  970.69   44.58
   5  -4  10  720.71   39.79
  -5   4 -11    7.78    7.15
   5   4  11   31.27    7.67
  -5  -4 -11   23.20   12.50
   5  -4  11   17.11   13.80
  -5   4 -12 1018.11   64.81
   5   4  12 1141.39   62.66
  -5  -4 -12 1371.78   80.33
   5  -4  12 1070.57   68.00
  -5   4 -13   24.91   15.11
  -5  -4 -13   32.35   11.12
   5  -4  13   38.01   27.44
  -5   4 -14  579.69   55.80
  -5  -4 -14  776.14   65.02
   5  -4  14  637.06   58.43
  -5   4 -15   24.66   14.92
  -5  -4 -15   12.11    8.98
   5  -4  15   14.46   27.02
  -5   4 -16  269.63   40.32
   5  -4  16  430.88   44.89
   5  -4  17   10.98   15.18
  -5   5  16   29.83   35.12
  -5  -5  16   43.15   19.21
  -5  -5  16   70.54   25.47
  -5   5  15  119.14   23.51
  -5  -5  15  108.31   21.74
  -5  -5  15  134.82   24.49
  -5   5  14    4.66    7.93
  -5  -5  14   14.15    8.88
  -5  -5  14   25.66   14.57
  -5   5  13 1048.35   86.43
  -5  -5  13 1112.63   91.88
  -5  -5  13 1116.88   93.15
  -5   5  12   44.18   12.99
  -5  -5  12   74.70   17.77
  -5  -5  12   74.08   16.55
  -5   5  11   69.04   18.96
  -5  -5  11   78.10   18.92
  -5  -5  11   91.19   22.28
  -5   5  10   74.74   22.22
  -5  -5  10   99.97   20.85
  -5  -5  10  116.93   23.08
  -5   5   9 1912.16  136.04
  -5  -5   9 1980.10  142.06
  -5  -5   9 2294.52  161.78
  -5   5   8  206.48   25.21
  -5  -5   8  256.12   32.78
  -5  -5   8  263.42   30.73
  -5   5   7    4.51    4.63
  -5  -5   7   11.84   11.48
  -5  -5   7    3.67    5.71
  -5   5   6    5.33    5.75
   5  -5  -6    6.03    2.93
  -5  -5   6    8.00    6.05
   5  -5  -6    2.82    2.65
  -5  -5   6   10.72   14.66
  -5   5   5 1681.61   87.37
   5  -5  -5 1800.98   88.13
  -5  -5   5 1848.38   97.06
   5  -5  -5 2357.97  114.05
  -5  -5   5 1970.19  101.23
  -5   5   4   15.52    6.67
  -5  -5   4   15.75   14.73
   5  -5  -4   13.10    6.69
   5  -5  -4   13.82    3.99
  -5  -5   4   11.58    5.60
  -5   5   3  244.65   20.56
  -5   5   3  241.08   35.57
   5  -5  -3  330.34   26.16
  -5  -5   3  285.62   28.78
  -5  -5   3  305.53   25.77
  -5   5   2  468.01   37.42
   5   5  -2  577.32   43.44
  -5   5   2  519.60   42.18
  -5  -5   2  561.08   42.49
  -5  -5   2  528.02   44.34
  -5   5   1 1983.29  109.46
   5   5  -1 2403.38  128.90
  -5   5   1 2038.57  114.05
  -5  -5   1 2340.15  125.92
  -5  -5   1 2269.24  127.34
   5   5   0    4.74    3.47
  -5   5   0    7.04    5.64
  -5  -5   0    2.63    2.80
  -5  -5   0   19.83   11.15
  -5   5  -1  347.50   29.62
   5   5   1  407.60   29.11
  -5  -5  -1  434.97   37.99
  -5  -5  -1  398.56   28.45
   5  -5   1  327.94   29.06
  -5   5  -2  623.30   50.19
  -5  -5  -2  910.77   70.13
   5  -5   2  725.52   56.76
  -5   5  -3  994.08   54.38
  -5  -5  -3 1505.76   76.05
   5  -5   3 1036.17   55.46
  -5   5  -4  229.34   45.61
  -5  -5  -4  351.39   36.24
   5  -5   4  247.11   24.90
  -5   5  -5 1368.08   75.28
  -5  -5  -5 2176.87  112.69
   5  -5   5 1345.61   74.37
  -5   5  -6   24.63   18.61
  -5  -5  -6   95.82   11.94
   5  -5   6   45.93    9.94
  -5   5  -7 1461.66   84.41
  -5  -5  -7 2244.54  120.47
   5  -5   7 1544.09   87.22
  -5   5  -8  334.30   40.99
  -5  -5  -8  648.78   65.57
   5  -5   8  428.55   46.38
  -5   5  -9  821.69   65.56
  -5  -5  -9 1390.46  101.10
   5  -5   9  914.65   71.22
  -5   5 -10   75.16   21.63
  -5  -5 -10  158.49   34.20
   5  -5  10  134.61   21.90
  -5   5 -11   60.69   19.12
  -5  -5 -11  121.59   19.81
   5  -5  11   88.96   18.68
  -5   5 -12   12.67   11.75
  -5  -5 -12   40.09    9.65
   5  -5  12   34.98   21.14
  -5   5 -13  960.18   81.05
  -5  -5 -13 1496.96  116.80
   5  -5  13 1131.81   95.07
  -5   5 -14    6.93    7.74
  -5  -5 -14   15.30   13.95
   5  -5  14   15.49   16.00
  -5   5 -15   31.37   14.47
   5  -5  15   52.81   19.76
  -5   5 -16   60.71   23.39
   5  -5  16   30.76   33.03
  -5  -6  15  211.88   39.63
  -5  -6  15  213.08   31.03
  -5   6  14  328.57   33.29
  -5  -6  14  319.26   44.03
  -5  -6  14  363.52   32.87
  -5   6  13   29.41   83.20
  -5  -6  13   30.17   24.33
  -5  -6  13   38.12   20.71
  -5   6  12  159.47   25.03
  -5  -6  12  146.14   25.25
  -5  -6  12  180.79   27.10
  -5   6  11  222.40   38.32
  -5  -6  11  288.44   38.44
  -5  -6  11  286.10   26.18
  -5   6  10  531.23   43.74
  -5  -6  10  536.07   31.23
  -5  -6  10  592.76   32.05
  -5   6   9    5.88    8.70
  -5  -6   9   21.96   24.66
  -5  -6   9   10.48    9.88
  -5   6   8  196.25   25.50
  -5  -6   8  299.71   34.67
  -5   6   7  500.19   44.95
  -5  -6   7  613.88   51.42
  -5  -6   7  681.89   54.06
  -5   6   6    6.46    8.80
   5  -6  -6    6.38    6.39
  -5  -6   6    5.25   10.63
  -5  -6   6    9.29    7.90
  -5   6   5    6.78    6.34
   5  -6  -5    9.87    4.05
  -5  -6   5    8.61   12.28
  -5  -6   5   15.44    8.85
  -5   6   4 1458.99   81.40
   5  -6  -4 1615.33   84.40
  -5  -6   4 1750.27   97.70
  -5  -6   4 1846.61   97.07
  -5   6   3  444.02   40.47
  -5  -6   3  464.29   44.28
   5  -6  -3  459.20   39.64
  -5  -6   3  492.26   41.47
  -5   6   2  438.82   38.54
   5   6  -2  415.32   35.26
  -5   6   2  427.64   39.62
  -5  -6   2  496.82   41.67
  -5  -6   2  509.60   47.53
  -5   6   1   55.84   10.23
   5   6  -1   61.12    5.83
  -5  -6   1   72.64   15.73
  -5  -6   1   61.75    6.99
  -5   6   0  606.32   48.50
   5   6   0  668.62   42.52
  -5  -6   0  671.23   50.78
  -5  -6   0  640.11   40.57
   5  -6   0  622.04   45.30
  -5   6  -1  364.78   34.27
  -5  -6  -1  539.78   49.11
   5  -6   1  444.62   41.88
  -5   6  -2    7.40    7.84
  -5  -6  -2    8.63   10.50
   5  -6   2    8.86    8.31
  -5   6  -3  245.77   28.68
  -5  -6  -3  301.09   31.75
   5  -6   3  201.70   24.48
  -5   6  -4  767.43   48.85
  -5  -6  -4 1010.72   85.53
   5  -6   4  845.66   52.34
  -5   6  -5  332.77   38.38
  -5  -6  -5  463.74   48.60
   5  -6   5  323.81   37.43
  -5   6  -6   61.07   12.96
  -5  -6  -6  106.90   17.00
   5  -6   6   64.54   13.75
  -5   6  -7  150.66   23.37
  -5  -6  -7  279.81   30.46
   5  -6   7  193.55   23.37
  -5   6  -8  780.71   63.57
  -5  -6  -8 1408.90  104.62
   5  -6   8  936.75   74.85
  -5   6  -9  226.86   34.16
  -5  -6  -9  424.48   49.43
   5  -6   9  245.28   34.66
  -5   6 -10   83.89   32.38
  -5  -6 -10  103.52   17.77
   5  -6  10   64.75   37.85
  -5   6 -11  264.02   35.43
  -5  -6 -11  393.02   46.02
   5  -6  11  270.02   39.04
  -5   6 -12  218.04   34.60
  -5  -6 -12  359.54   44.38
   5  -6  12  294.56   41.07
  -5   6 -13   17.94   17.06
  -5  -6 -13   16.02    9.76
   5  -6  13   16.77   12.39
  -5   6 -14   62.50   18.11
   5  -6  14  140.19   25.83
  -5   6 -15  119.39   23.39
  -5  -7  13  284.77   30.52
  -5  -7  13  262.91   30.68
  -5  -7  12  479.41   46.10
  -5  -7  12  472.50   44.97
  -5   7  11   20.27   14.00
  -5  -7  11   13.45   18.29
  -5  -7  11   17.13   10.59
  -5   7  10  159.97   24.46
  -5  -7  10  271.16   41.07
  -5  -7  10  282.87   37.97
  -5   7   9  368.29   43.68
  -5  -7   9  418.90   42.27
  -5  -7   9  417.32   49.42
  -5   7   8  579.21   32.24
  -5  -7   8  642.09   55.62
  -5  -7   8  708.76   29.67
  -5   7   7    3.29    2.88
  -5  -7   7    8.86   12.61
  -5  -7   7   10.26    6.51
  -5   7   6  641.89   42.14
  -5  -7   6  790.90   53.80
  -5  -7   6  841.58   50.53
  -5   7   5  462.17   88.28
   5  -7  -5  515.70   39.68
  -5  -7   5  484.36   94.48
  -5  -7   5  555.94   43.94
  -5   7   4  205.93   24.66
   5  -7  -4  170.76   20.08
  -5  -7   4  138.62   22.75
  -5  -7   4  159.46   20.10
  -5   7   3   79.93   18.63
  -5  -7   3   65.83   18.24
   5  -7  -3   57.25   11.61
  -5  -7   3   62.10   11.72
  -5  -7   2 1638.79  119.96
   5  -7  -2 1453.00  103.70
   5  -7  -2 1510.26  108.01
  -5  -7   1  439.13   38.82
   5  -7  -1  410.09   60.50
  -5   7   0  141.78   17.63
  -5  -7   0  173.87   23.35
   5  -7   0  134.91   16.88
  -5   7  -1   14.71   11.02
   5  -7   1   12.54    9.52
  -5   7  -2 1189.63   87.97
  -5  -7  -2 1541.01  112.96
   5  -7   2 1278.98   93.91
  -5   7  -3  127.50   21.28
  -5  -7  -3  163.05   28.89
   5  -7   3  102.84   20.98
  -5   7  -4   13.97    9.76
  -5  -7  -4    8.26   14.11
   5  -7   4    4.42    8.85
  -5   7  -5  215.47   31.92
  -5  -7  -5  248.80   33.16
   5  -7   5  199.89   28.12
  -5   7  -6  760.47   52.71
  -5  -7  -6 1069.43   65.21
   5  -7   6  824.35   58.79
  -5   7  -7  119.40   24.08
  -5  -7  -7  129.97   23.30
   5  -7   7  113.80   23.46
  -5   7  -8   29.42   11.75
  -5  -7  -8   34.89   14.03
   5  -7   8   33.51   10.24
  -5   7  -9  275.35   38.63
  -5  -7  -9  387.15   46.59
   5  -7   9  282.97   38.24
  -5   7 -10  664.70   53.73
  -5  -7 -10 1169.27   81.05
   5  -7  10  784.14   60.48
  -5   7 -11   35.50   23.42
  -5  -7 -11   39.52   12.32
   5  -7  11   53.12   20.23
  -5   7 -12   72.58   20.53
   5  -7  12  116.80   23.73
  -5   7 -13  147.01   28.18
   5  -7  13  168.30   28.16
  -5  -8  11  708.04   66.79
  -5  -8  11  794.57   73.61
  -5  -8  10    9.59   19.06
  -5  -8  10    8.69   13.65
  -5  -8   9   13.83    9.10
  -5  -8   9   17.86   12.72
  -5  -8   8    8.19    6.83
  -5  -8   8   13.98   10.76
  -5  -8   7 1569.36   53.66
  -5  -8   7 1720.29  111.06
  -5   8   6   28.54   14.34
  -5  -8   6   28.14   16.20
  -5  -8   5   30.42   14.70
  -5  -8   4   40.03   19.42
   5  -8  -4   13.83    9.78
  -5  -8   3 1334.11  103.87
   5  -8  -3 1300.82   95.46
   5  -8  -3 1199.05   88.70
  -5  -8   2   31.14   17.58
   5  -8  -2   10.71   12.52
   5  -8  -2   40.20   10.99
  -5  -8   1  315.45   42.30
   5  -8  -1  278.42   29.22
   5  -8  -1  293.12   30.24
  -5  -8   0   13.99   11.19
   5  -8   0   23.52   11.80
   5  -8   0   27.21    8.26
  -5  -8  -1 1536.35  102.25
   5  -8   1 1220.10   80.35
  -5   8  -2   27.83   12.04
  -5  -8  -2   19.83   12.49
   5  -8   2   20.53    9.41
  -5   8  -3  864.67   68.92
  -5  -8  -3 1201.86   92.80
   5  -8   3  853.83   67.52
  -5   8  -4  124.14   29.11
  -5  -8  -4  148.61   30.34
   5  -8   4   65.87   17.10
  -5   8  -5  448.43   43.01
  -5  -8  -5  637.83   55.96
   5  -8   5  520.07   47.70
  -5   8  -6   15.49   15.77
  -5  -8  -6   20.06   10.09
   5  -8   6   22.23   16.48
  -5   8  -7  944.42   70.92
  -5  -8  -7 1385.77   93.59
   5  -8   7  909.07   65.91
  -5   8  -8   20.02   24.38
  -5  -8  -8   18.84   14.86
   5  -8   8    6.81    9.61
  -5   8  -9  198.64   40.64
  -5  -8  -9  328.45   41.24
   5  -8   9  235.64   33.61
  -5   8 -10    9.82    8.43
  -5  -8 -10    5.15    8.63
   5  -8  10    5.72    9.03
  -5   8 -11  598.10   65.37
   5  -8  11  711.90   67.53
  -5  -9   8  315.55   38.32
  -5  -9   7   15.61   14.20
  -5  -9   6  695.76   65.53
  -5  -9   5   30.59   15.19
  -5  -9   4  234.36   40.79
  -5  -9   3   14.77   21.27
  -5  -9   2  838.02   81.80
  -5  -9   1   97.45   24.33
   5  -9  -1   73.50   15.64
   5  -9  -1   70.29   15.82
  -5  -9   0   13.62    6.92
   5  -9   0   37.26    9.63
   5  -9   0   43.17   11.23
  -5  -9  -1   25.56   18.42
   5  -9   1    5.65    4.22
   5  -9   1    4.65    9.26
  -5  -9  -2 1044.91   98.67
   5  -9   2 1056.12   43.61
   5  -9   2 1007.75   40.74
  -5  -9  -3  100.96   19.08
   5  -9   3   34.59   13.17
   5  -9   3   56.22   14.63
  -5  -9  -4   10.13    7.39
   5  -9   4    9.79    7.05
  -5  -9  -5   20.55   13.59
   5  -9   5   43.74   13.47
  -5   9  -6  511.38   49.29
  -5  -9  -6  786.11   65.84
   5  -9   6  656.53   57.31
  -5   9  -7   38.95   23.02
  -5  -9  -7   26.80   26.81
   5  -9   7    9.00   14.66
  -5   9  -8   26.45   18.22
  -5  -9  -8   45.07   20.21
   5  -9   8   28.73   14.45
  -5 -10   2   57.23   23.85
  -5 -10   1  159.14   29.85
  -5 -10   0  169.35   26.85
   5 -10   0  152.68   24.27
  -5 -10  -1  303.73   38.55
   5 -10   1  276.93   33.84
  -5 -10  -2   16.39   16.20
   5 -10   2   11.98    9.15
  -6   0  18  561.93   65.88
  -6   0  17   13.95    9.67
  -6   0  16  114.62   23.15
  -6   0  15   11.28   11.57
  -6   0  14 2103.36  117.85
  -6   0  13    2.89    4.61
  -6   0  13    8.57   12.19
  -6   0  12  106.43   12.90
  -6   0  12   89.32   17.97
  -6   0  11    4.34    6.29
  -6   0  11   15.20    9.33
  -6   0  10 1831.06   90.78
  -6   0  10 1972.48   97.67
  -6   0  10 2003.82  105.75
  -6   0   9    4.03    3.81
  -6   0   9    2.93    4.57
  -6   0   9    6.55    6.39
  -6   0   8 1036.35   58.27
  -6   0   8 1154.45   83.01
  -6   0   8 1062.91   79.84
  -6   0   7    2.06    2.66
  -6   0   7    8.12    4.88
  -6   0   7    7.19    7.61
   6   0  -6 5469.46  325.39
  -6   0   6 5329.69  320.12
  -6   0   5    3.68    5.11
   6   0  -5    1.78    3.46
  -6   0   5   20.40   13.52
   6   0  -4 8706.46   58.43
  -6   0   4 7890.65  453.24
  -6   0   3    5.82    6.49
   6   0  -3    3.07    4.15
  -6   0   3   10.09    7.72
  -6   0   2 2668.06  155.49
   6   0  -2 2292.94  133.99
  -6   0   2 1764.72  104.94
  -6   0   1    5.67    6.67
  -6   0   1    4.10    5.38
  -6   0   0 5639.13  324.30
  -6   0  -1    3.22    3.30
  -6   0  -2 1673.11   31.91
  -6   0  -2 1086.10   24.68
  -6   0  -3    5.45    4.90
  -6   0  -4  533.13   43.49
   6   0   4  380.10   31.34
  -6   0  -5    8.90    7.71
   6   0   5    4.32    6.02
  -6   0  -6    8.77    7.40
   6   0   6    9.55    5.95
  -6   0  -7    2.71    4.77
   6   0   7    4.80    2.64
  -6   0  -8 1062.36   79.99
   6   0   8  875.31   66.33
  -6   0  -9   20.57    8.14
   6   0   9    7.11    6.82
  -6   0 -10  526.92   41.49
   6   0  10  499.63   38.47
  -6   0 -11    6.13    8.77
  -6   0 -12  934.89   71.33
   6   0  12  774.99   60.20
  -6   0 -13    3.09    7.33
   6   0  13    4.36   10.64
  -6   0 -14   45.53   15.71
   6   0  14    7.20    7.22
  -6   0 -15    4.25    4.88
   6   0  15    3.04    5.72
  -6   0 -16 1215.74   84.39
   6   0  16 1315.62   90.72
  -6   0 -17    6.53    5.98
   6   0  17   21.13   13.34
  -6   0 -18    4.55   10.51
   6   0  18   21.85   29.97
  -6   1  18    3.82    8.80
  -6  -1  18    5.49    5.80
  -6   1  17  154.85   25.63
  -6  -1  17  231.50   35.88
  -6   1  16  338.21   48.25
  -6  -1  16  280.70   40.72
  -6   1  15  830.35   68.18
  -6  -1  15 1045.16   86.01
  -6   1  14   36.73   17.96
  -6  -1  14   26.35    9.72
  -6  -1  14   17.66   19.81
  -6   1  13  270.93   39.30
  -6  -1  13  260.40   29.68
  -6  -1  13  273.98   34.58
  -6   1  12  264.29   26.10
  -6   1  12  218.77   29.56
  -6  -1  12  238.19   27.11
  -6  -1  12  205.28   28.91
  -6   1  11 1769.13   89.61
  -6   1  11 1414.85   81.12
  -6  -1  11 1428.42   78.28
  -6  -1  11 1497.85   85.24
  -6   1  10  188.75   14.12
  -6   1  10  216.07   15.87
  -6   1  10  186.12   20.63
  -6  -1  10  159.15   20.91
  -6  -1  10  193.79   21.88
  -6   1   9 1782.91   80.52
  -6   1   9 1354.00   71.85
  -6  -1   9 1316.35   64.10
  -6  -1   9 1309.76   68.06
  -6   1   8  151.37   13.16
  -6   1   8  228.81   18.44
  -6   1   8  187.04   20.15
  -6  -1   8  189.35   18.08
  -6  -1   8  167.50   20.20
  -6   1   7 3749.03  190.04
  -6   1   7 3729.78  194.69
  -6  -1   7 4141.99  212.57
  -6  -1   7 3976.40  207.16
  -6   1   6  826.98   61.22
  -6   1   6  586.63   47.71
  -6  -1   6  700.25   53.86
   6  -1  -6  582.43   43.62
  -6  -1   6  659.04   53.77
  -6   1   5 1824.39  223.79
  -6   1   5 1229.41   92.48
  -6  -1   5 1559.31   96.30
   6  -1  -5 1392.73   84.59
  -6  -1   5 1338.26   85.37
  -6   1   4 1498.19  108.99
  -6   1   4 1002.47   76.17
   6  -1  -4 1187.58   86.92
  -6  -1   4 1046.47   80.01
  -6  -1   4 1183.22   88.39
  -6   1   3 2359.91  136.98
  -6   1   3 1614.06   97.16
  -6  -1   3 2182.96  128.36
   6  -1  -3 2246.12  130.61
  -6  -1   3 1742.84  104.04
  -6   1   2 2119.05  123.91
  -6   1   2 1496.27   90.25
  -6  -1   2 1967.78  116.78
   6  -1  -2 2220.37  129.33
  -6  -1   2 1541.28   92.08
  -6   1   1 4904.35  281.99
  -6   1   1 3479.62  202.53
  -6  -1   1 5177.83  298.36
   6  -1  -1 5722.56  328.38
  -6  -1   1 3681.98  213.10
  -6   1   0   62.99   16.13
   6   1   0   55.37    8.41
  -6   1   0   40.16    9.07
  -6  -1   0   86.39   11.54
  -6  -1   0   41.34    8.38
   6  -1   0   70.49    9.61
  -6   1  -1   81.57   11.29
   6   1   1   74.54    8.37
  -6   1  -1   43.20    8.06
  -6  -1  -1   43.99    6.62
  -6  -1  -1   80.14   12.44
  -6   1  -2  810.44   47.07
   6   1   2  676.08   38.63
  -6   1  -2  573.08   34.91
  -6  -1  -2  574.94   33.62
  -6  -1  -2  915.90   52.66
  -6   1  -3 7698.43  442.28
  -6   1  -3 6114.83  352.19
   6   1   3 6738.26  386.29
  -6  -1  -3 6132.45  351.96
  -6   1  -4   15.47    6.49
   6   1   4    8.92    8.98
   6   1   4    2.23    5.45
   6  -1   4    8.50    7.06
  -6  -1  -4    5.92    8.69
  -6   1  -5  188.25   14.98
   6   1   5  181.59   11.17
  -6  -1  -5  230.89   15.99
   6  -1   5  164.25   12.61
  -6   1  -6 1419.71   94.73
   6   1   6 1235.90   80.82
  -6  -1  -6 1561.88  102.83
   6  -1   6 1285.28   85.79
  -6   1  -7 5762.51  296.87
   6   1   7 5381.84  275.27
  -6  -1  -7 7148.68  365.99
   6  -1   7 5289.91  272.66
  -6   1  -8   41.43    9.97
   6   1   8   48.71   10.65
  -6  -1  -8   32.27   12.38
   6  -1   8   37.73   11.50
  -6   1  -9   98.00   15.92
   6   1   9   69.97    8.71
   6  -1   9   96.04   14.27
  -6   1 -10   42.27   13.15
   6   1  10   46.82   12.27
  -6  -1 -10   60.69   12.99
   6  -1  10   43.56   10.54
  -6   1 -11 1633.32   91.73
   6   1  11 1590.53   87.99
  -6  -1 -11 1860.64  101.98
   6  -1  11 1663.71   92.86
  -6   1 -12   13.15    7.57
   6   1  12   12.73    6.05
  -6  -1 -12   17.94   11.21
   6  -1  12    8.81    8.86
  -6   1 -13  589.85   51.44
   6   1  13  706.03   57.30
  -6  -1 -13  737.09   59.52
   6  -1  13  668.70   54.97
  -6   1 -14  233.98   28.86
   6   1  14  213.29   34.95
  -6  -1 -14  198.10   25.34
   6  -1  14  197.61   27.40
  -6   1 -15  653.75   59.03
   6   1  15  760.57   64.87
  -6  -1 -15  794.76   67.56
   6  -1  15  847.02   74.26
  -6   1 -16   18.89   11.74
   6   1  16   22.33   16.88
  -6  -1 -16    8.75   11.30
   6  -1  16    9.23   12.86
  -6   1 -17  223.11   30.86
  -6  -1 -17  221.46   31.68
   6  -1  17  304.47   39.68
  -6   1 -18   80.03   19.28
   6   1  18   95.49   20.75
  -6  -1 -18   53.02   20.88
   6  -1  18  128.52   24.35
  -6   2  18  175.86   34.35
  -6  -2  18  173.36   27.73
  -6   2  17  352.73   40.08
  -6  -2  17  360.25   40.44
  -6   2  16   44.50   16.78
  -6  -2  16   33.62   19.50
  -6   2  15  123.21   24.11
  -6  -2  15   83.68   30.68
  -6  -2  15   94.98   22.98
  -6   2  14  650.84   50.17
  -6  -2  14  767.78   53.17
  -6  -2  14  669.21   55.22
  -6   2  13  633.18   64.92
  -6  -2  13  683.74   53.94
  -6  -2  13  726.35   60.16
  -6   2  12   62.78   15.53
  -6  -2  12   65.81   10.80
  -6  -2  12   88.13   26.92
  -6   2  11  587.77   35.08
  -6  -2  11  633.63   31.23
  -6  -2  11  703.67   38.69
  -6   2  10 1572.72   88.13
  -6  -2  10 1601.94   86.71
  -6  -2  10 1721.45   96.25
  -6   2   9  431.23   36.69
  -6  -2   9  381.87   31.93
  -6  -2   9  471.28   40.48
  -6   2   8    7.01    7.02
  -6  -2   8   11.41    9.88
  -6  -2   8    5.58    6.45
  -6   2   7  724.91   56.14
  -6  -2   7  770.84   58.61
  -6  -2   7  778.94   60.19
  -6   2   6 2559.41  136.21
  -6  -2   6 2806.57  147.66
   6  -2  -6 2605.61  131.77
  -6  -2   6 2732.40  144.11
  -6   2   5 1058.07   76.89
  -6   2   5  956.72   73.50
  -6  -2   5 1015.57   79.14
   6  -2  -5 1159.12   83.97
  -6  -2   5 1062.00   80.68
  -6   2   4  558.17   42.09
  -6   2   4  431.53   36.20
  -6  -2   4  552.45   43.82
   6  -2  -4  679.52   50.71
  -6  -2   4  566.50   45.78
  -6   2   3 2216.46  134.00
  -6   2   3 1886.65  116.71
   6  -2  -3 3105.46  185.75
  -6  -2   3 2454.99  149.89
  -6  -2   3 2136.10  130.61
  -6   2   2 6177.14  369.24
  -6  -2   2 6507.55  387.37
  -6   2   1  101.85   10.45
   6   2  -1   94.84   10.77
  -6   2   1   96.08   12.92
   6  -2  -1  124.81   11.41
  -6  -2   1  108.15   10.64
  -6  -2   1  110.39   13.27
  -6   2   0 1036.15   57.60
  -6   2   0  950.74   24.99
   6  -2   0 1426.83   77.18
  -6  -2   0  947.89   52.61
  -6   2  -1 2234.50  131.53
   6   2   1 2347.49  136.58
  -6   2  -1 1826.95  109.76
  -6  -2  -1 1879.89  110.22
  -6  -2  -1 2639.74  155.37
  -6   2  -2 2087.08  127.97
   6   2   2 2109.81  127.42
  -6   2  -2 1757.13  109.52
  -6  -2  -2 1800.77  109.31
  -6  -2  -2 2783.01  169.66
  -6   2  -3   40.93    9.30
   6   2   3   24.73    5.71
  -6  -2  -3   22.90    6.29
  -6  -2  -3   21.69    4.30
   6  -2   3   21.06    6.63
  -6   2  -4  937.80   71.92
   6   2   4  872.31   65.00
   6   2   4  854.61   63.83
  -6  -2  -4 1252.89   94.56
   6  -2   4  778.66   60.67
  -6   2  -5 5036.23  259.75
   6   2   5 4704.56  239.54
  -6  -2  -5 7002.37  357.91
   6  -2   5 4579.67  236.71
  -6   2  -6 1268.55   85.67
   6   2   6 1215.08   79.05
   6   2   6 1250.22   81.32
  -6  -2  -6 1823.57  119.74
   6  -2   6 1234.21   83.62
  -6   2  -7  160.34   26.43
   6   2   7  181.31   17.80
  -6  -2  -7  227.87   23.50
   6  -2   7  198.67   30.27
  -6   2  -8 2112.00  103.19
   6   2   8 2409.84  111.59
  -6  -2  -8 2940.04  138.38
   6  -2   8 2229.95  107.73
  -6   2  -9  534.61   41.97
   6   2   9  553.14   39.17
  -6  -2  -9  698.34   50.49
   6  -2   9  571.47   44.63
  -6   2 -10   71.66   15.77
   6   2  10  102.31   11.93
  -6  -2 -10  116.66   16.84
   6  -2  10   53.36   44.64
  -6   2 -11  270.95   33.26
   6   2  11  299.75   32.20
  -6  -2 -11  324.46   37.55
   6  -2  11  260.61   32.46
  -6   2 -12 1363.48  101.25
   6   2  12 1427.86  102.44
  -6  -2 -12 1642.42  118.70
   6  -2  12 1401.44  103.98
  -6   2 -13  359.85   44.38
   6   2  13  397.23   46.13
  -6  -2 -13  420.62   48.41
   6  -2  13  365.10   48.05
  -6   2 -14  100.11   24.80
   6   2  14  100.17   22.49
  -6  -2 -14   92.73   19.13
   6  -2  14   90.84   27.08
  -6   2 -15  214.08   31.08
   6   2  15  245.70   33.59
  -6  -2 -15  243.19   33.63
   6  -2  15  257.03   35.72
  -6   2 -16  436.83   48.07
   6   2  16  525.28   52.21
  -6  -2 -16  522.20   51.87
   6  -2  16  580.34   58.43
  -6   2 -17   76.13   18.08
   6   2  17   83.38   17.00
  -6  -2 -17   85.86   20.15
   6  -2  17  114.24   24.46
  -6   3  17   11.45   12.62
  -6  -3  17    9.53    6.32
  -6   3  16  404.72   49.92
  -6  -3  16  460.41   48.32
  -6  -3  16  428.10   47.84
  -6   3  15   37.31   27.14
  -6  -3  15  101.87   17.88
  -6  -3  15   81.26   16.91
  -6   3  14   16.55   10.66
  -6  -3  14   11.98   15.42
  -6   3  13  252.15   32.89
  -6  -3  13  210.04   31.37
  -6  -3  13  206.33   30.08
  -6   3  12 1231.14   94.25
  -6  -3  12 1270.27   94.16
  -6  -3  12 1370.43  103.09
  -6   3  11   81.42   14.13
  -6  -3  11   81.51   13.19
  -6  -3  11   86.28   14.24
  -6   3  10   80.61   16.18
  -6  -3  10  116.72   16.54
  -6  -3  10  112.02   19.94
  -6   3   9   81.71   13.23
  -6  -3   9   79.45   13.06
  -6  -3   9   95.27   25.41
  -6   3   8 1722.64   90.51
  -6  -3   8 1629.47   81.01
  -6  -3   8 1899.89  100.90
  -6   3   7  238.78   26.85
  -6  -3   7  236.72   22.58
  -6  -3   7  276.75   26.03
  -6   3   6  191.19   20.18
  -6  -3   6  203.76   20.98
  -6  -3   6  182.71   19.49
  -6   3   5 1951.07   99.57
  -6   3   5 1928.95  104.59
   6  -3  -5 2722.42  138.03
  -6  -3   5 2161.80  116.28
  -6  -3   5 2030.95  109.70
  -6   3   4 3413.42  178.21
   6  -3  -4 5788.61  292.24
  -6  -3   4 4084.64  211.96
  -6  -3   4 3850.35  198.56
  -6   3   3  720.00   47.61
  -6   3   3  617.17   44.54
   6  -3  -3 1066.55   68.88
  -6  -3   3  792.75   55.27
  -6  -3   3  698.97   47.82
  -6   3   2  595.20   45.58
   6   3  -2  761.02   58.04
  -6   3   2  511.08   46.42
   6  -3  -2  957.03   71.21
  -6  -3   2  648.70   49.90
  -6  -3   2  691.08   55.14
  -6   3   1  114.69    8.90
  -6   3   1  133.56   12.73
   6  -3  -1  165.06   10.45
  -6  -3   1  171.48   15.45
  -6  -3   1  120.07    7.98
  -6   3   0 2993.95  181.15
   6   3   0 3686.04  220.26
  -6   3   0 2924.24  178.51
  -6  -3   0 2878.08  172.59
  -6  -3   0 3678.48  222.84
  -6   3  -1  349.02  136.61
   6   3   1  386.66   30.16
  -6   3  -1  311.54   28.26
  -6  -3  -1  329.49   26.36
  -6  -3  -1  448.30   39.57
  -6   3  -2 1080.54   95.54
   6   3   2 1297.03   94.61
  -6   3  -2 1060.26   81.03
  -6  -3  -2 1054.31   77.30
  -6  -3  -2 1544.33  115.18
  -6   3  -3 1694.95   95.82
   6   3   3 1932.36   99.90
  -6  -3  -3 2485.52  132.63
   6  -3   3 1645.57   90.46
  -6   3  -4 1922.08  105.48
   6   3   4 2171.28  111.58
   6   3   4 2231.07  114.66
   6  -3   4 2118.83  114.68
  -6  -3  -4 2953.04  155.89
  -6   3  -5  115.06   19.24
   6   3   5  142.44   12.84
   6   3   5  148.11   14.61
  -6  -3  -5  184.84   23.03
   6  -3   5  127.34   18.38
  -6   3  -6 5213.23  280.94
   6   3   6 5398.41  285.40
  -6  -3  -6 8110.40  431.99
   6  -3   6 5123.73  276.51
  -6   3  -7 1012.95   56.52
   6   3   7 1117.25   53.77
   6   3   7 1242.98   60.51
  -6  -3  -7 1567.70   81.68
   6  -3   7 1122.91   61.40
  -6   3  -8  249.47   25.21
   6   3   8  298.04   22.64
   6   3   8  298.32   23.68
  -6  -3  -8  432.91   35.40
   6  -3   8  228.08   23.21
  -6   3  -9  110.99   15.88
   6   3   9  118.48   11.64
  -6  -3  -9  114.09   14.89
   6  -3   9   66.92   13.19
  -6   3 -10 3083.58  190.72
   6   3  10 3788.35  227.08
  -6  -3 -10 4710.51  155.87
   6  -3  10 3545.26  218.21
  -6   3 -11  213.48   25.72
   6   3  11  203.57   24.52
  -6  -3 -11  255.67   26.19
   6  -3  11  217.47   27.48
  -6   3 -12  111.45   18.88
   6   3  12   97.33   20.80
  -6  -3 -12   71.56   16.53
   6  -3  12  129.88   22.32
  -6   3 -13  119.24   26.27
   6   3  13  178.90   17.17
  -6  -3 -13  201.49   24.03
  -6   3 -14  972.40   79.48
   6   3  14 1233.54   92.71
  -6  -3 -14 1224.03   93.23
   6  -3  14 1159.73   90.91
  -6   3 -15  180.92   27.70
  -6  -3 -15  217.54   30.00
   6  -3  15  170.40   31.02
  -6   3 -16   43.51   21.07
  -6  -3 -16   41.65   17.46
   6  -3  16   43.85   34.24
  -6  -3 -17   35.84   17.73
   6  -3  17   42.43   25.57
  -6   4  16   21.48   16.44
  -6  -4  16   13.27   10.05
  -6  -4  16   14.91    8.55
  -6   4  15  182.33   30.44
  -6  -4  15  196.04   33.11
  -6  -4  15  146.89   32.18
  -6   4  14   92.53   23.17
  -6  -4  14   56.97   23.24
  -6  -4  14   83.40   21.74
  -6   4  13 1151.07   88.51
  -6  -4  13 1208.88   92.08
  -6  -4  13 1263.41   99.11
  -6   4  12   13.92    9.96
  -6  -4  12    4.36    7.46
  -6  -4  12   11.64   10.94
  -6   4  11  529.19   44.86
  -6  -4  11  634.25   55.46
  -6  -4  11  680.27   56.76
  -6   4  10   57.19   17.21
  -6  -4  10   62.28   13.53
  -6  -4  10   99.88   16.23
  -6   4   9 1269.01   53.71
  -6  -4   9 1229.22   52.22
  -6  -4   9 1351.59   56.10
  -6   4   8   60.00   12.82
  -6  -4   8   72.61   14.72
  -6  -4   8   39.45   10.55
  -6   4   7 2945.87  147.75
  -6  -4   7 3504.21  176.21
  -6  -4   7 3766.70  186.04
  -6   4   6    7.90    7.11
   6  -4  -6    2.59    1.60
  -6  -4   6    1.18    6.17
  -6  -4   6   12.68    6.97
  -6   4   5 1011.67   46.94
  -6   4   5  956.92   36.33
  -6  -4   5 1103.59   43.01
  -6  -4   5 1091.96   38.61
  -6   4   4  233.59   19.12
  -6   4   4  241.32   22.83
   6  -4  -4  395.83   29.95
  -6  -4   4  266.04   26.22
  -6  -4   4  253.01   23.52
  -6   4   3 3301.17  176.36
  -6   4   3 3123.41  170.75
   6  -4  -3 4861.55  257.68
  -6  -4   3 3874.93  211.09
  -6  -4   3 3706.48  199.19
  -6   4   2    5.28    5.68
   6   4  -2    5.57    8.35
  -6   4   2   14.32    8.62
   6  -4  -2    6.06    6.78
  -6  -4   2    8.70    7.85
  -6  -4   2    9.73    4.33
  -6   4   1  279.09   22.33
   6   4  -1  369.71   26.56
  -6   4   1  323.09   27.95
  -6  -4   1  321.30   23.76
  -6  -4   1  344.04   29.22
  -6   4   0   65.06   12.17
   6   4   0   71.51   10.61
  -6   4   0   56.95   12.75
  -6  -4   0   67.56   11.71
  -6  -4   0   75.65   15.42
  -6   4  -1 3339.10  173.78
   6   4   1 4311.55  218.39
  -6   4  -1 3377.26  177.13
  -6  -4  -1 3552.82  180.42
  -6  -4  -1 4559.76  236.68
  -6   4  -2  307.37   32.47
   6   4   2  453.60   33.06
  -6  -4  -2  450.52   39.34
  -6  -4  -2  349.63   25.87
   6  -4   2  380.74   33.18
  -6   4  -3   79.51   15.90
   6   4   3   97.91   10.06
   6   4   3   90.04    9.39
  -6  -4  -3  152.35   24.44
   6  -4   3   87.33   15.66
  -6   4  -4  187.10   82.52
   6   4   4  219.54   16.65
   6   4   4  214.78   16.41
  -6  -4  -4  276.29   26.56
   6  -4   4  201.65   22.64
  -6   4  -5 3868.84  178.91
   6   4   5 4655.58  204.61
  -6  -4  -5 6104.96  276.26
   6  -4   5 4096.34  189.91
  -6   4  -6  275.99   43.05
   6   4   6  329.78   22.00
   6   4   6  334.15   22.58
  -6  -4  -6  452.16   36.94
   6  -4   6  360.36   31.85
  -6   4  -7   57.14   14.38
   6   4   7   50.64    5.70
   6   4   7   65.21    6.15
  -6  -4  -7   77.05   15.95
   6  -4   7   79.84   16.92
  -6   4  -8  469.65   45.84
   6   4   8  530.72   43.07
  -6  -4  -8  583.95   51.98
   6  -4   8  503.23   46.70
  -6   4  -9 1370.08   59.73
   6   4   9 1606.92   54.33
  -6  -4  -9 2158.57   85.73
   6  -4   9 1474.35   62.72
  -6   4 -10  213.82   25.03
   6   4  10  247.87   20.44
  -6  -4 -10  277.09   28.64
   6  -4  10  219.69   25.29
  -6   4 -11  245.53   36.03
   6   4  11  328.62   34.12
  -6  -4 -11  409.58   45.34
   6  -4  11  301.81   37.13
  -6   4 -12   24.75    8.18
  -6  -4 -12    9.86    8.94
   6  -4  12   17.40   14.50
  -6   4 -13  748.38   63.70
  -6  -4 -13 1055.55   82.04
   6  -4  13  851.94   70.05
  -6   4 -14   32.14   23.04
  -6  -4 -14   29.39   10.42
   6  -4  14   20.29   17.08
  -6   4 -15  301.29   36.01
  -6  -4 -15  302.65   38.43
   6  -4  15  271.06   43.01
  -6   4 -16   14.22   13.56
  -6  -4 -16    4.68    6.78
   6  -4  16   14.01   10.69
  -6   5  16  554.10   55.23
  -6  -5  16  536.51   55.07
  -6  -5  16  557.30   57.35
  -6   5  15   83.42   20.38
  -6  -5  15   98.57   20.44
  -6  -5  15   84.08   25.45
  -6   5  14   47.76   14.61
  -6  -5  14   24.50   14.57
  -6  -5  14   72.40   20.16
  -6   5  13    2.26    6.53
  -6  -5  13   15.27   13.95
  -6  -5  13   11.78   15.32
  -6   5  12 1098.34   84.69
  -6  -5  12 1287.02   98.03
  -6  -5  12 1175.72   92.74
  -6   5  11   91.15   19.43
  -6  -5  11   84.91   17.16
  -6  -5  11   91.51   20.31
  -6   5  10   73.13   21.21
  -6  -5  10   42.53   15.73
  -6  -5  10   51.55   17.06
  -6   5   9  189.84   24.93
  -6  -5   9  199.14   27.75
  -6  -5   9  174.38   25.76
  -6   5   8 1150.28   85.75
  -6  -5   8 1220.54   91.19
  -6  -5   8 1361.13   99.12
  -6   5   7  348.85   37.95
  -6  -5   7  361.12   41.17
  -6  -5   7  446.66   47.80
  -6   5   6  533.87   48.88
   6  -5  -6  647.12   50.81
  -6  -5   6  609.53   55.38
  -6  -5   6  628.83   54.14
  -6   5   5    7.09   10.37
  -6  -5   5   14.00    6.26
   6  -5  -5    8.58    5.53
   6  -5  -5   21.19    5.63
  -6  -5   5   19.57   11.07
  -6   5   4 1350.28   67.82
  -6   5   4 1256.50   68.31
   6  -5  -4 2003.42   98.69
  -6  -5   4 1458.16   80.89
  -6  -5   4 1623.82   83.20
  -6   5   3    4.55    5.23
  -6   5   3    5.42    9.23
   6  -5  -3    4.90    7.24
  -6  -5   3    8.44   10.46
  -6  -5   3    7.61    6.61
  -6   5   2  109.73   10.46
   6   5  -2  137.36   11.13
  -6   5   2  118.63   13.00
  -6  -5   2  150.18   11.04
  -6  -5   2  134.93   17.50
  -6   5   1  272.50   23.27
   6   5  -1  334.51   25.63
  -6   5   1  275.73   27.85
  -6  -5   1  309.88   24.75
  -6  -5   1  339.90   31.58
  -6   5   0 1202.94   61.42
   6   5   0 1498.84   68.90
  -6   5   0 1241.47   64.52
  -6  -5   0 1252.99   58.24
  -6  -5   0 1579.45   79.97
  -6   5  -1  143.04   19.56
   6   5   1  212.47   16.05
  -6  -5  -1  260.95   27.45
  -6  -5  -1  176.08   13.52
   6  -5   1  170.14   19.62
  -6   5  -2 1669.92   82.34
  -6  -5  -2 2339.77  112.94
   6  -5   2 1830.14   90.90
  -6   5  -3  129.02   18.20
  -6  -5  -3  157.06   16.67
   6  -5   3  116.10   16.13
  -6   5  -4  992.88   57.76
  -6  -5  -4 1561.16   84.35
   6  -5   4 1129.54   63.65
  -6  -5  -5   15.67   10.79
   6  -5   5    8.42    4.92
  -6   5  -6  635.90   56.12
  -6  -5  -6  955.15   82.23
   6  -5   6  741.66   49.08
  -6   5  -7   18.43   10.23
  -6  -5  -7   61.77   15.40
   6  -5   7   67.10   14.34
  -6   5  -8  384.23   58.13
  -6  -5  -8  680.81   55.75
   6  -5   8  409.49   36.22
  -6   5  -9  155.53   26.46
  -6  -5  -9  224.35   29.22
   6  -5   9  157.93   24.89
  -6   5 -10  877.04   56.96
  -6  -5 -10 1341.20   77.89
   6  -5  10  934.22   60.43
  -6   5 -11  124.25   26.79
  -6  -5 -11  166.12   27.01
   6  -5  11  126.32   31.31
  -6   5 -12   13.28   15.17
  -6  -5 -12   11.83    9.23
   6  -5  12   21.49   18.62
  -6   5 -13    1.73    3.60
  -6  -5 -13   25.30   14.16
   6  -5  13   30.14   19.74
  -6   5 -14  569.10   52.53
  -6  -5 -14  798.94   66.47
   6  -5  14  701.45   63.48
  -6   5 -15   38.78   16.54
   6  -5  15   21.74   16.91
  -6   6  14  197.85   33.77
  -6  -6  14  212.57   27.82
  -6  -6  14  212.16   31.44
  -6   6  13  408.61   40.39
  -6  -6  13  478.76   49.60
  -6  -6  13  517.85   53.27
  -6   6  12    4.70    7.84
  -6  -6  12    8.69   10.03
  -6  -6  12   11.45    9.30
  -6   6  11  211.09   32.10
  -6  -6  11  226.55   33.26
  -6  -6  11  279.30   37.07
  -6   6  10  497.07   55.29
  -6  -6  10  531.15   61.08
  -6  -6  10  660.60   70.97
  -6   6   9  387.65   39.87
  -6  -6   9  413.25   42.73
  -6  -6   9  455.30   42.86
  -6   6   8   15.84   16.99
  -6  -6   8    2.45   11.55
  -6  -6   8   22.71    8.36
  -6   6   7  832.85   65.71
  -6  -6   7  890.49   71.99
  -6  -6   7  979.18   74.30
  -6   6   6  168.65   19.56
  -6  -6   6  144.05   20.27
  -6  -6   6  216.77   22.08
  -6   6   5    9.73    7.06
  -6  -6   5   17.17   17.81
   6  -6  -5    3.19    4.86
  -6  -6   5    5.89    5.07
  -6   6   4  254.55   32.49
  -6  -6   4  236.82   30.66
   6  -6  -4  233.20   24.71
  -6  -6   4  267.02   28.49
  -6   6   3 1190.53   45.70
  -6   6   3 1151.01   47.97
  -6  -6   3 1383.23   59.25
  -6  -6   3 1290.95   47.04
  -6   6   2  547.25   27.86
  -6   6   2  545.46   30.84
  -6  -6   2  720.68   37.15
  -6  -6   2  688.81   28.08
  -6   6   1  121.82   15.25
  -6   6   1  114.87   14.80
  -6  -6   1  134.64   17.02
  -6  -6   1  119.97    8.72
  -6   6   0  421.19   38.28
  -6  -6   0  523.18   49.69
  -6  -6   0  434.96   35.11
   6  -6   0  398.06   37.59
  -6   6  -1 1530.56   84.12
  -6  -6  -1 2035.43  111.31
   6  -6   1 1593.76   88.42
  -6   6  -2  277.33   31.19
  -6  -6  -2  373.28   42.37
   6  -6   2  239.60   29.17
  -6   6  -3    9.80   10.81
  -6  -6  -3   18.73   12.82
   6  -6   3   10.73    4.68
  -6   6  -4  247.62   30.96
  -6  -6  -4  415.62   46.42
   6  -6   4  288.91   33.45
  -6   6  -5  439.34   39.76
  -6  -6  -5  642.00   92.34
   6  -6   5  403.51   36.73
  -6   6  -6   46.87   17.73
  -6  -6  -6   29.43   12.85
   6  -6   6   26.34   10.91
  -6   6  -7   59.79   20.81
  -6  -6  -7   98.18   19.35
   6  -6   7   33.00   11.74
  -6   6  -8  204.11   51.14
  -6  -6  -8  333.25   43.13
   6  -6   8  184.04   30.11
  -6   6  -9  571.65   47.05
  -6  -6  -9 1021.80   71.29
   6  -6   9  642.09   50.65
  -6   6 -10   21.52   20.17
  -6  -6 -10   23.58   13.80
   6  -6  10   12.56   22.42
  -6   6 -11  191.56   32.14
  -6  -6 -11  362.44   45.32
   6  -6  11  186.54   32.20
  -6   6 -12  235.66   37.66
  -6  -6 -12  361.29   50.93
   6  -6  12  277.60   41.86
  -6   6 -13  273.33   51.38
  -6  -6 -13  422.90   50.48
   6  -6  13  355.69   42.27
  -6   6 -14   11.65    9.32
   6  -6  14   30.68   19.88
  -6  -7  13  244.51   33.02
  -6  -7  13  234.16   32.89
  -6  -7  12  151.80   23.70
  -6  -7  12  192.31   24.96
  -6   7  11  417.74   40.52
  -6  -7  11  475.54   45.66
  -6  -7  11  479.00   45.06
  -6   7  10    9.26    4.87
  -6  -7  10   23.89   16.55
  -6  -7  10   25.09   11.26
  -6   7   9  433.00   40.91
  -6  -7   9  362.47   47.25
  -6  -7   9  520.34   48.36
  -6   7   8  520.39   59.50
  -6  -7   8  485.19   57.59
  -6  -7   8  571.68   61.65
  -6   7   7  227.27   18.75
  -6  -7   7  262.31   36.77
  -6  -7   7  278.02   20.77
  -6   7   6    9.20   14.11
  -6  -7   6   20.17   20.02
  -6  -7   6    9.25   10.22
  -6   7   5  669.31   43.42
  -6  -7   5  645.56   47.90
  -6  -7   5  674.93   41.21
  -6   7   4  281.05   34.21
  -6  -7   4  352.73   43.54
   6  -7  -4  303.60   33.99
  -6  -7   4  362.60   41.01
  -6   7   3  223.74   27.44
  -6  -7   3  308.44   42.89
   6  -7  -3  221.38   25.27
  -6  -7   3  289.22   30.83
  -6  -7   2    7.73   13.01
   6  -7  -2    8.21   11.46
  -6   7   1 1800.74  129.17
  -6  -7   1 2123.60  153.58
   6  -7  -1 1671.02  121.80
  -6   7   0  308.57   34.54
  -6  -7   0  441.18   50.77
   6  -7   0  373.18   43.83
  -6   7  -1   54.44   16.36
  -6  -7  -1   49.30   14.98
   6  -7   1   38.30   10.94
  -6   7  -2  193.82   26.00
  -6  -7  -2  233.10   31.01
   6  -7   2  186.50   26.14
  -6   7  -3 1122.75   85.42
  -6  -7  -3 1546.42  114.41
   6  -7   3 1153.95   87.55
  -6   7  -4  454.17   37.85
  -6  -7  -4  543.04   61.48
   6  -7   4  423.75   29.70
  -6   7  -5   30.20   12.38
  -6  -7  -5   20.01   17.48
   6  -7   5   66.61   21.22
  -6   7  -6  107.89   23.58
  -6  -7  -6  206.36   33.26
   6  -7   6  146.20   25.39
  -6   7  -7  922.67   73.93
  -6  -7  -7 1540.39  116.61
   6  -7   7 1033.73   82.36
  -6  -7  -8  264.33   35.22
   6  -7   8  189.10   30.51
  -6   7  -9  258.09   38.19
  -6  -7  -9  420.47   51.31
   6  -7   9  261.71   37.03
  -6   7 -10  147.97   29.63
  -6  -7 -10  295.23   41.91
   6  -7  10  173.54   36.41
  -6   7 -11  460.02   45.90
  -6  -7 -11  756.13   62.39
   6  -7  11  517.85   51.01
  -6   7 -12   13.93   18.62
  -6  -7 -12   19.52   13.74
   6  -7  12   25.35   14.17
  -6  -8  10  680.62   80.61
  -6  -8  10  722.27   78.58
  -6  -8   9    3.73   10.98
  -6  -8   9   11.96    7.30
  -6  -8   8   12.28   11.38
  -6   8   7   28.67   11.34
  -6  -8   7   14.23   14.77
  -6   8   6 1042.00   71.33
  -6  -8   6 1162.48   84.36
  -6   8   5   13.93    9.63
  -6  -8   5   17.23   13.27
  -6  -8   4   97.90   29.04
   6  -8  -4   89.51   16.67
  -6  -8   3   42.89   32.91
   6  -8  -3   37.51    9.87
  -6  -8   2 1146.94   91.05
   6  -8  -2  975.47   75.16
   6  -8  -2 1000.81   76.37
  -6  -8   1   42.17   14.79
   6  -8  -1    8.61    5.00
   6  -8  -1   40.00   16.08
  -6  -8   0  601.53   68.34
   6  -8   0  366.78   42.62
  -6   8  -1   40.19   19.04
  -6  -8  -1   51.18   20.15
   6  -8   1   43.40   13.13
  -6   8  -2  508.94   56.98
  -6  -8  -2  720.70   43.63
   6  -8   2  589.52   31.59
  -6   8  -3    4.36    7.59
  -6  -8  -3   11.54   12.38
  -6   8  -4  880.20   77.87
  -6  -8  -4 1246.57  102.01
   6  -8   4  930.55   78.12
  -6   8  -5    7.14    8.18
  -6  -8  -5   22.42   10.96
   6  -8   5   24.15    8.29
  -6   8  -6  291.55   40.56
  -6  -8  -6  361.60   47.49
   6  -8   6  295.40   40.63
  -6   8  -7    9.70   13.65
  -6  -8  -7   14.87   16.76
   6  -8   7   18.75   18.83
  -6   8  -8  554.66   51.62
  -6  -8  -8  944.57   75.85
   6  -8   8  645.95   61.16
  -6   8  -9   21.99   21.02
  -6  -8  -9   36.45   18.58
   6  -8   9    9.73    5.89
  -6   8 -10   21.77   15.08
  -6  -8 -10   67.87   24.83
   6  -8  10   19.13   12.05
  -6  -9   7  176.74   30.57
  -6  -9   6    8.10   12.11
  -6  -9   5  783.01   89.05
  -6  -9   4   51.63   15.94
  -6  -9   3  162.96   27.10
  -6  -9   2   17.24   17.96
   6  -9  -2   13.05    7.17
  -6  -9   1  682.13   67.97
   6  -9  -1  524.28   52.60
   6  -9  -1  491.17   48.82
  -6  -9   0   87.93   21.08
   6  -9   0   71.60   16.36
   6  -9   0   52.75   16.98
   6  -9   1    6.29    5.79
   6  -9   1    8.98    8.84
  -6  -9  -2   14.17   11.25
   6  -9   2   17.08   11.76
   6  -9   2    4.18   11.26
  -6  -9  -3  693.29   63.78
   6  -9   3  564.18   48.54
  -6   9  -4   10.87   15.25
  -6  -9  -4    8.27    6.92
   6  -9   4    4.81    7.39
  -6   9  -5   90.71   25.60
  -6  -9  -5   99.65   19.07
   6  -9   5   97.45   21.64
  -6   9  -6   12.94    6.34
  -6  -9  -6    8.83    7.44
   6  -9   6    3.05    9.80
  -6   9  -7  568.93   60.84
  -6  -9  -7  889.28   79.90
   6  -9   7  651.32   65.94
  -7   0  18    5.11    9.78
  -7   0  17  923.65   76.63
  -7   0  16   13.38    8.51
  -7   0  15  111.49   24.91
  -7   0  14   29.50   16.82
  -7   0  13 1549.78   90.19
  -7   0  12    6.07    7.95
  -7   0  12   18.11   15.04
  -7   0  11  142.76   14.07
  -7   0  11  141.29   22.62
  -7   0  10   10.29    5.57
  -7   0  10    3.94    3.85
  -7   0   9 4812.17  230.74
  -7   0   9 4291.04  212.51
  -7   0   8    5.18    4.95
  -7   0   8    8.33    5.45
  -7   0   8    5.26    7.21
  -7   0   7   17.52    5.08
   7   0  -7    7.20    5.64
  -7   0   7   26.12    8.92
  -7   0   6    5.94    5.74
   7   0  -6    1.84    5.75
  -7   0   6   11.20   17.08
   7   0  -5 6118.12  310.68
  -7   0   5 5640.58  289.70
  -7   0   4    9.21    5.70
   7   0  -4    4.22    3.99
  -7   0   4   17.86    8.70
  -7   0   3 1001.49   75.35
  -7   0   3  674.58   54.04
  -7   0   2   10.22    7.67
  -7   0   2    7.24    8.76
  -7   0   1 6753.98  402.41
  -7   0   1 4355.90  261.67
  -7   0   0    1.20    3.87
  -7   0   0    2.22    4.22
  -7   0  -1  716.20   56.30
  -7   0  -1  401.74   33.53
  -7   0  -2   12.58    9.80
  -7   0  -2    3.52    4.55
  -7   0  -3 3116.25  189.79
  -7   0  -3 2052.53  126.03
  -7   0  -4    6.53    5.59
   7   0   4   12.44    8.47
  -7   0  -5 5722.31  294.15
   7   0   5 4226.32  218.17
   7   0   6    5.27    4.34
  -7   0  -7 2624.31  145.83
   7   0   7 2159.53  120.35
  -7   0  -8    5.44    6.54
   7   0   8    7.41    4.55
  -7   0  -9 2571.50  131.88
   7   0   9 2237.30  114.71
  -7   0 -10    9.26    7.60
   7   0  10    6.84   12.35
  -7   0 -11  235.01   30.21
   7   0  11  181.15   24.57
  -7   0 -12   10.38    4.11
   7   0  12    4.82   10.26
  -7   0 -13 3033.25  161.31
   7   0  13 2588.23  138.84
  -7   0 -14   10.39   12.13
   7   0  14    4.93    7.74
  -7   0 -15   17.27    8.33
   7   0  15   17.65   17.95
  -7   0 -16   12.86    7.45
   7   0  16    5.61    8.23
  -7   0 -17  316.02   41.45
   7   0  17  346.62   47.24
  -7   1  17   40.41   19.27
  -7  -1  17   30.20   19.40
  -7   1  16  115.41   25.68
  -7  -1  16  121.51   26.38
  -7   1  15  318.37   43.37
  -7  -1  15  362.55   46.84
  -7   1  14  937.52   68.78
  -7  -1  14 1026.31   67.60
  -7  -1  14  845.97   63.21
  -7   1  13    6.72    8.37
  -7  -1  13    3.35    5.14
  -7  -1  13    5.37    7.57
  -7   1  12  521.39   46.57
  -7  -1  12  575.03   45.52
  -7  -1  12  471.25   70.61
  -7   1  11  609.74   57.63
  -7   1  11  406.20   45.38
  -7  -1  11  491.34   50.30
  -7  -1  11  467.97   50.04
  -7   1  10 1132.92   58.75
  -7   1  10  803.56   51.01
  -7  -1  10  854.86   48.89
  -7  -1  10  832.75   51.96
  -7   1   9   97.13    7.87
  -7   1   9  146.66    9.26
  -7   1   9  116.95   15.90
  -7  -1   9  114.80   10.71
  -7  -1   9  124.86   16.87
  -7   1   8 1616.50   74.06
  -7   1   8 2251.79  101.93
  -7   1   8 1614.65   82.12
  -7  -1   8 1810.73   85.77
  -7  -1   8 1633.21   83.61
  -7   1   7  959.41   69.41
  -7   1   7  649.93   54.07
  -7  -1   7  801.52   61.40
   7  -1  -7  681.45   49.62
  -7  -1   7  690.34   55.13
  -7   1   6  558.45   37.91
  -7   1   6  363.03   29.70
  -7  -1   6  476.25   35.87
   7  -1  -6  386.65   26.81
  -7  -1   6  407.68   32.78
  -7   1   5  408.37   28.94
  -7   1   5  293.27   26.93
  -7  -1   5  368.01   28.97
   7  -1  -5  313.54   22.90
  -7  -1   5  261.52   23.69
  -7   1   4 5771.46  346.32
   7  -1  -4 7318.44  434.38
  -7  -1   4 7679.80  457.18
  -7  -1   4 6125.38  366.65
  -7   1   3  329.95   12.97
  -7   1   3  229.13   15.75
  -7  -1   3  310.92   16.13
   7  -1  -3  321.61   41.70
  -7  -1   3  214.96   14.40
  -7   1   2   11.36    6.85
  -7  -1   2   11.31    7.78
   7  -1  -2    6.65    5.93
  -7  -1   2    7.66    8.24
  -7   1   1  391.89   50.42
  -7   1   1  270.83   24.56
  -7  -1   1  445.55   37.00
  -7  -1   1  269.06   35.49
  -7   1   0 5105.94  306.25
  -7  -1   0 5360.61  320.38
  -7   1  -1  850.18   65.85
  -7   1  -1  607.12   48.57
  -7  -1  -1 1002.90   76.29
  -7  -1  -1  671.14   51.79
  -7   1  -2  324.53   17.06
  -7   1  -2  273.37   24.69
  -7  -1  -2  439.10   37.25
  -7  -1  -2  276.28   24.49
  -7   1  -3  257.79   17.36
  -7   1  -3  163.53   13.32
  -7  -1  -3  315.52   18.29
  -7  -1  -3  181.52   12.38
  -7   1  -4 5616.63  337.09
   7   1   4 4596.73  275.55
  -7  -1  -4 6876.40  411.86
   7  -1   4 4675.21  281.45
  -7   1  -5    9.03   12.90
   7   1   5   15.45   12.05
  -7  -1  -5    7.85    8.66
   7  -1   5   10.07   12.32
  -7   1  -6   21.31   13.85
   7   1   6   16.66    6.42
  -7  -1  -6   15.84    7.67
   7  -1   6    8.98    8.37
  -7   1  -7 1188.21   35.79
   7   1   7 1127.27   65.22
  -7  -1  -7 1395.15  103.32
   7  -1   7 1130.14   67.02
  -7   1  -8 1068.08   79.81
   7   1   8  897.48   67.00
  -7  -1  -8 1212.87   88.67
   7  -1   8  908.57   68.11
  -7   1  -9  124.26   15.61
   7   1   9  118.76   13.96
  -7  -1  -9  143.08   17.85
   7  -1   9  129.19   18.46
  -7   1 -10  480.71   44.82
   7   1  10  490.15   44.61
  -7  -1 -10  543.13   50.68
   7  -1  10  517.02   53.66
  -7   1 -11  189.85   25.14
   7   1  11  177.47   25.56
  -7  -1 -11  253.49   32.52
   7  -1  11  201.49   27.20
  -7   1 -12  860.71   68.78
   7   1  12  997.14   76.37
  -7  -1 -12 1121.70   86.94
   7  -1  12  941.72   75.07
  -7   1 -13   57.80   19.03
   7   1  13   69.35   30.52
  -7  -1 -13   80.30   20.36
   7  -1  13   62.17   14.34
  -7   1 -14  510.48   58.40
   7   1  14  544.77   61.21
  -7  -1 -14  565.39   63.97
   7  -1  14  577.30   64.02
  -7   1 -15  125.61   22.31
   7   1  15  171.69   20.24
  -7  -1 -15  126.01   22.30
   7  -1  15  154.42   25.93
  -7   1 -16  259.03   41.59
   7   1  16  399.87   48.21
  -7  -1 -16  373.72   45.71
   7  -1  16  387.07   45.24
   7   1  17   27.68   16.98
  -7   1 -17   28.50   23.56
   7  -1  17   26.18    7.15
  -7  -1 -17   15.29   13.57
  -7   2  17  256.13   33.13
  -7  -2  17  284.90   35.12
  -7   2  16  335.52   40.91
  -7  -2  16  330.90   43.78
  -7   2  15   38.25   22.50
  -7  -2  15   21.17   17.22
  -7  -2  15   28.43   19.70
  -7   2  14  113.67   29.62
  -7  -2  14  147.08   29.35
  -7  -2  14  129.86   30.10
  -7  -2  13  996.81   59.35
  -7  -2  13 1080.94   68.82
  -7   2  12  212.59   27.58
  -7  -2  12  261.98   33.03
  -7  -2  12  237.12   31.47
  -7   2  11    9.35    6.50
  -7  -2  11   17.98    8.30
  -7  -2  11   24.29   11.80
  -7   2  10  357.20   40.08
  -7  -2  10  384.99   40.55
  -7  -2  10  398.20   43.64
  -7   2   9 1762.84   94.07
  -7  -2   9 2090.81  106.72
  -7  -2   9 1941.51  102.94
  -7   2   8  116.48   15.81
  -7  -2   8  140.25   22.16
  -7  -2   8  127.30   14.69
  -7   2   7  118.47    6.44
  -7   2   7  127.49   15.15
  -7  -2   7  121.95   11.41
  -7  -2   7  107.62   12.13
  -7   2   6 1138.27   80.53
  -7   2   6  965.42   73.26
  -7  -2   6 1093.77   81.43
   7  -2  -6 1079.59   58.79
  -7  -2   6 1037.75   77.68
  -7   2   5 4037.13  210.51
   7  -2  -5 4980.35  252.09
  -7  -2   5 4834.69  249.16
  -7  -2   5 4346.09  225.04
  -7   2   4   36.09   16.66
  -7   2   4   31.91   14.66
  -7  -2   4   51.19   11.96
   7  -2  -4   47.88    8.19
  -7  -2   4   32.16   11.13
  -7   2   3    9.17    6.44
  -7   2   3   28.88   10.47
   7  -2  -3   15.88    5.93
  -7  -2   3   13.52    9.97
  -7  -2   3   19.65    8.98
  -7   2   2 3872.29  231.89
  -7   2   2 3144.25  191.43
   7  -2  -2 5292.25  315.60
  -7  -2   2 4309.20  259.84
  -7  -2   2 3359.47  203.16
  -7   2   1 1406.66   87.39
  -7   2   1 1217.89  151.95
  -7  -2   1 1665.81  123.59
  -7  -2   1 1219.03  150.97
  -7   2   0   46.26   13.44
  -7   2   0   32.41   10.90
  -7  -2   0   57.84   14.15
  -7  -2   0   33.75    6.90
  -7   2  -1 2913.17  176.82
  -7   2  -1 2429.77  150.06
  -7  -2  -1 3694.30  223.90
  -7  -2  -1 2469.37  149.66
  -7   2  -2  677.89   55.15
   7   2   2  750.46   56.76
  -7   2  -2  623.07   50.40
  -7  -2  -2  609.72   46.77
  -7  -2  -2  841.45   65.98
  -7   2  -3 1664.64  147.03
   7   2   3 1710.61   90.61
  -7   2  -3 1479.75  131.48
  -7  -2  -3 1472.31  128.99
  -7  -2  -3 2351.81  125.71
  -7   2  -4   52.73   13.10
   7   2   4   32.19    6.85
   7   2   4   41.58   10.94
  -7  -2  -4   38.62   11.25
   7  -2   4   40.35   10.29
  -7   2  -5 1661.04   95.14
   7   2   5 1491.91   83.20
  -7  -2  -5 2089.04  118.21
   7  -2   5 1370.03   80.24
  -7   2  -6  793.87   62.44
   7   2   6  831.71   61.79
  -7  -2  -6 1142.63   85.95
   7  -2   6  802.45   62.25
  -7   2  -7  740.87   57.03
   7   2   7  658.38   48.47
  -7  -2  -7  977.90   72.48
   7  -2   7  668.43   52.18
  -7   2  -8  598.60   47.92
   7   2   8  564.31   40.13
  -7  -2  -8  714.75   52.20
   7  -2   8  597.08   46.22
  -7   2  -9 1752.92   97.54
   7   2   9 1755.96   93.20
  -7  -2  -9 2096.29  113.29
   7  -2   9 1658.12   92.12
  -7   2 -10  452.79   48.53
   7   2  10  530.26   37.87
  -7  -2 -10  599.97   61.60
   7  -2  10  433.68   47.38
  -7   2 -11   31.11   15.56
   7   2  11   35.01   12.42
  -7  -2 -11   19.77   17.86
   7  -2  11   11.17   10.05
  -7   2 -12  324.07   38.86
   7   2  12  353.29   39.76
  -7  -2 -12  381.12   43.40
   7  -2  12  379.51   45.78
  -7   2 -13 1066.76   74.88
   7   2  13 1216.66   83.23
  -7  -2 -13 1240.21   84.45
   7  -2  13 1309.67   88.65
  -7   2 -14  235.06   22.52
   7   2  14  335.11   38.94
  -7  -2 -14  366.14   46.53
   7  -2  14  274.43   36.85
  -7   2 -15    5.10    8.68
   7   2  15    7.95    8.55
  -7  -2 -15    3.33    5.57
   7  -2  15    5.03    8.26
  -7   2 -16  435.03   43.04
   7   2  16  481.57   43.96
  -7  -2 -16  497.12   47.56
   7  -2  16  392.93   46.07
  -7   2 -17  187.67   32.98
  -7  -2 -17  136.15   27.12
   7  -2  17  174.40   30.18
  -7   3  17   35.28   17.71
  -7  -3  17   68.42   30.82
  -7   3  16  100.13   22.33
  -7  -3  16  113.99   23.19
  -7  -3  16   94.13   23.17
  -7   3  15  761.98   75.43
  -7  -3  15  702.43   67.68
  -7  -3  15  748.51   73.91
  -7   3  14  200.11   31.46
  -7  -3  14  215.94   32.85
  -7  -3  14  189.70   36.02
  -7   3  13   31.81   18.61
  -7  -3  13   18.15   13.92
  -7  -3  13   10.21   16.31
  -7   3  12  124.26   28.12
  -7  -3  12  139.86   23.03
  -7  -3  12  133.96   25.76
  -7   3  11 2270.89  163.13
  -7  -3  11 2314.22  164.26
  -7  -3  11 2354.92  168.84
  -7   3  10  196.96   35.80
  -7  -3  10  234.35   28.53
  -7  -3  10  169.62   24.71
  -7   3   9   57.79   14.17
  -7  -3   9   65.08   13.71
  -7  -3   9   56.73   15.45
  -7   3   8  673.33   60.76
  -7  -3   8  753.69   65.33
  -7  -3   8  807.91   50.93
  -7   3   7 3882.82  192.92
  -7  -3   7 4382.37  215.26
  -7  -3   7 4210.00  207.33
  -7   3   6   50.88    4.05
  -7   3   6   46.32   12.19
  -7  -3   6   58.96   15.04
   7  -3  -6   63.75    3.87
  -7  -3   6   65.21   11.05
  -7   3   5   33.03    5.11
  -7   3   5   36.41   10.15
  -7  -3   5   45.22   16.48
   7  -3  -5   33.30    4.96
  -7  -3   5   17.00    6.97
  -7   3   4  246.23   20.02
  -7   3   4  216.96   21.89
   7  -3  -4  339.84   26.20
  -7  -3   4  221.11   23.13
  -7  -3   4  252.86   23.13
  -7   3   3 1793.25   97.55
  -7   3   3 1654.10   94.71
   7  -3  -3 2745.31  147.37
  -7  -3   3 2057.29  115.10
  -7  -3   3 1783.66   98.98
  -7   3   2   59.60   12.38
  -7   3   2   68.98   16.09
   7  -3  -2   80.90   16.65
  -7  -3   2   87.19   19.83
  -7  -3   2   74.76   15.01
  -7   3   1 2216.96  116.26
  -7   3   1 2003.48  108.15
  -7  -3   1 2794.33  147.94
  -7  -3   1 2257.60  117.94
  -7   3   0  607.98  139.99
  -7   3   0  444.58   34.78
  -7  -3   0  770.76   54.64
  -7  -3   0  550.33   37.89
  -7   3  -1 1145.66   76.07
   7   3   1 1357.00   87.29
  -7   3  -1 1091.01   74.02
  -7  -3  -1 1056.92   69.08
  -7  -3  -1 1547.04  102.40
   7   3   2  364.57   26.17
  -7   3  -2  299.95   25.98
  -7  -3  -2  297.25   21.93
  -7  -3  -2  481.68   38.58
  -7   3  -3 2889.76  159.71
   7   3   3 3291.11  175.57
  -7  -3  -3 4562.57  246.75
  -7  -3  -3 2754.76  147.48
   7  -3   3 2626.94  145.81
  -7   3  -4 1049.82   79.26
   7   3   4 1025.82   73.98
   7   3   4 1092.06   22.00
   7  -3   4  993.19   75.31
  -7  -3  -4 1532.91   38.86
  -7   3  -5  909.27   70.72
   7   3   5  908.22   65.89
   7   3   5  868.81   63.59
  -7  -3  -5 1207.87   90.86
   7  -3   5  728.32   57.87
  -7   3  -6   21.85   10.77
   7   3   6   36.10    5.82
   7   3   6   26.31    5.73
  -7  -3  -6   40.43   12.78
   7  -3   6   25.39   23.37
  -7   3  -7 2846.74  144.50
   7   3   7 3336.09  161.74
  -7  -3  -7 4498.81  221.93
   7  -3   7 3019.22  153.76
  -7   3  -8  571.34   51.46
   7   3   8  600.50   50.43
  -7  -3  -8  882.70   75.83
   7  -3   8  642.76   57.06
  -7   3  -9  156.16   24.20
   7   3   9  165.72   19.86
  -7  -3  -9  214.65   29.38
   7  -3   9  113.36   24.81
  -7   3 -10  210.66   27.05
   7   3  10  208.13   19.40
  -7  -3 -10  222.96   24.14
   7  -3  10  145.08   21.96
  -7   3 -11  893.87   72.25
   7   3  11  957.37   71.45
  -7  -3 -11 1194.62   90.47
   7  -3  11  930.89   73.51
  -7   3 -12  189.96   24.53
   7   3  12  224.79   24.40
  -7  -3 -12  230.70   22.33
   7  -3  12  178.27   26.35
  -7   3 -13   16.94    9.93
   7   3  13   11.59    8.41
  -7  -3 -13   17.97    8.91
   7  -3  13    4.72   17.34
  -7   3 -14   78.71   21.97
  -7  -3 -14   89.28   17.98
   7  -3  14  100.52   23.96
  -7   3 -15  511.19   53.63
  -7  -3 -15  738.76   70.02
   7  -3  15  704.07   68.84
  -7   3 -16    4.84    8.65
   7  -3  16    4.73    6.00
  -7   4  16  449.91   54.52
  -7  -4  16  547.73   55.48
  -7  -4  16  439.49   57.13
  -7   4  15   10.07   24.91
  -7  -4  15   34.08   15.71
  -7  -4  15   20.30   15.00
  -7   4  14  432.43   54.62
  -7  -4  14  395.34   66.59
  -7  -4  14  441.45   57.13
  -7   4  13    9.36   14.86
  -7  -4  13   13.81    9.39
  -7  -4  13    8.26    8.55
  -7   4  12  551.37   33.24
  -7  -4  12  549.60   42.38
  -7  -4  12  574.15   58.23
  -7   4  11   24.55   24.72
  -7  -4  11   60.75   15.03
  -7  -4  11   24.79   10.62
  -7   4  10  595.53   51.40
  -7  -4  10  565.16   48.42
  -7  -4  10  686.20   56.53
  -7   4   9  513.68   44.31
  -7  -4   9  478.39   41.69
  -7  -4   9  514.20   43.76
  -7   4   8  162.63   22.32
  -7  -4   8  133.18   25.71
  -7  -4   8  204.95   27.41
  -7   4   7 1217.01   70.46
  -7  -4   7 1381.20   79.89
  -7  -4   7 1415.39   79.50
  -7   4   6 2110.43  109.62
  -7  -4   6 2429.15  125.20
   7  -4  -6 2877.91  136.50
  -7  -4   6 2453.02  124.66
  -7   4   5   21.42    4.42
  -7  -4   5   16.91    9.78
  -7  -4   5   32.82    9.88
  -7   4   4  185.38   16.25
  -7   4   4  210.63   22.38
   7  -4  -4  294.39   23.17
  -7  -4   4  212.79   22.19
  -7  -4   4  201.46   19.69
  -7   4   3   15.08    8.39
  -7   4   3   10.16    7.40
   7  -4  -3    8.43    4.23
  -7  -4   3   30.82   17.35
  -7  -4   3    6.59    7.88
  -7   4   2 2812.02  128.65
  -7   4   2 2651.34  125.34
  -7  -4   2 3298.67  154.65
  -7  -4   2 2943.71  134.46
  -7   4   1   20.65    6.75
   7   4  -1    8.23    7.57
  -7   4   1   18.91    9.78
  -7  -4   1   20.53    7.37
  -7  -4   1   17.58   18.62
  -7   4   0  546.71   43.01
   7   4   0  741.01   54.79
  -7   4   0  603.62   49.21
  -7  -4   0  591.19   44.13
  -7  -4   0  729.37   61.46
  -7   4  -1   23.65    7.77
   7   4   1   34.78    7.05
  -7   4  -1   24.04    8.25
  -7  -4  -1   18.02    4.53
  -7  -4  -1   24.19    8.45
  -7   4  -2 2299.06  108.93
   7   4   2 3018.17  135.21
  -7  -4  -2 3227.30  151.82
  -7  -4  -2 2442.86  110.24
  -7   4  -3   82.64   40.50
   7   4   3  113.55    7.38
   7   4   3  116.13    7.30
   7  -4   3  116.35   16.62
  -7  -4  -3  159.13   17.38
  -7   4  -4  102.92   13.69
   7   4   4  129.19    8.55
   7   4   4  119.22    6.84
  -7  -4  -4  172.42   18.27
   7  -4   4  116.15   19.72
  -7   4  -5  193.64   32.70
   7   4   5  208.22   16.36
   7   4   5  216.94   15.87
  -7  -4  -5  257.56   25.68
   7  -4   5  174.71   20.58
  -7   4  -6 2534.16  135.61
   7   4   6 3081.53  153.70
  -7  -4  -6 4214.13  217.29
   7  -4   6 2754.87  146.42
  -7   4  -7    7.04    9.94
   7   4   7    7.51    5.90
  -7  -4  -7   22.23   11.95
   7  -4   7   16.68   10.63
  -7   4  -8  171.55   25.46
   7   4   8  202.50   21.61
  -7  -4  -8  322.45   36.64
   7  -4   8  218.52   28.02
  -7   4  -9  105.77   18.81
   7   4   9  146.24   14.15
  -7  -4  -9  240.40   29.54
   7  -4   9  119.97   17.35
  -7   4 -10 1311.80  101.38
  -7  -4 -10 1953.05  141.55
   7  -4  10 1345.71  101.78
  -7   4 -11   14.29    9.65
  -7  -4 -11   20.69    9.66
   7  -4  11   16.84   13.97
  -7   4 -12  600.74   61.17
  -7  -4 -12  746.54   79.16
   7  -4  12  595.27   66.37
  -7   4 -13   14.44    7.47
  -7  -4 -13   24.34   11.10
   7  -4  13   14.56   14.62
  -7   4 -14  384.23   43.57
  -7  -4 -14  596.64   60.00
   7  -4  14  501.32   59.95
  -7   4 -15   15.79   12.27
  -7  -4 -15   12.42    6.61
   7  -4  15   13.42    7.31
  -7   4 -16  517.74   53.89
  -7  -4 -16  536.73   56.00
   7  -4  16  455.19   53.07
  -7   5  15  707.84   65.66
  -7  -5  15  905.57   79.69
  -7  -5  15  751.54   68.82
  -7   5  14   13.05   10.90
  -7  -5  14   15.06    8.92
  -7  -5  14    3.07    7.59
  -7   5  13   17.87   14.71
  -7  -5  13   14.51   17.12
  -7  -5  13   23.49   15.95
  -7   5  12   47.10   16.54
  -7  -5  12   29.04   20.56
  -7  -5  12   14.13   12.35
  -7   5  11  931.75   73.87
  -7  -5  11 1242.85   95.82
  -7  -5  11 1125.81   86.83
  -7   5  10   47.53   13.61
  -7  -5  10   26.70   14.40
  -7  -5  10   19.95   13.31
  -7   5   9   29.22   14.94
  -7  -5   9   42.16   23.68
  -7  -5   9   18.83   10.52
  -7   5   8   11.13   12.46
  -7  -5   8   11.90   16.30
  -7   5   7 1051.50   79.30
  -7  -5   7 1341.70   99.11
  -7  -5   7 1359.47   98.11
  -7   5   6   14.11   11.80
  -7  -5   6   26.25   15.93
  -7  -5   6   10.01    6.24
  -7   5   5  626.68   50.88
  -7   5   5  607.60   53.92
  -7  -5   5  659.52   59.07
  -7  -5   5  709.52   59.97
  -7   5   4  385.81   33.06
  -7   5   4  361.49   36.16
  -7  -5   4  394.09   39.22
  -7  -5   4  459.86   40.07
  -7   5   3 2076.24  107.31
  -7   5   3 1966.17  106.04
  -7  -5   3 2309.81  124.43
  -7  -5   3 2209.00  114.68
  -7   5   2   73.84   17.79
  -7   5   2   78.12   11.86
  -7  -5   2  102.23   17.31
  -7  -5   2  101.25   10.44
  -7   5   1 1054.20   56.92
   7   5  -1 1309.38   66.48
  -7   5   1 1032.95   58.86
  -7  -5   1 1150.80   58.99
  -7  -5   1 1384.49   76.68
  -7   5   0   53.09   17.07
   7   5   0   56.17    6.52
  -7   5   0   55.09   10.90
  -7  -5   0   49.91    7.68
  -7  -5   0   93.59   16.56
  -7   5  -1  964.21   56.06
   7   5   1 1122.74   56.19
  -7  -5  -1 1220.29   69.89
  -7  -5  -1  877.12   16.78
  -7   5  -2  104.44   17.49
   7   5   2  113.72    6.72
  -7  -5  -2  125.39   19.42
   7  -5   2  140.04   19.78
  -7   5  -3 2002.65  108.37
  -7  -5  -3 2946.99  155.49
   7  -5   3 2064.99  113.64
  -7   5  -4  109.82   26.31
  -7  -5  -4  160.55   17.83
   7  -5   4  132.43   19.04
  -7   5  -5  286.08   33.43
  -7  -5  -5  470.21   50.86
   7  -5   5  353.58   39.70
  -7   5  -6   63.23   20.94
  -7  -5  -6   99.83   20.06
   7  -5   6   68.46   15.32
  -7   5  -7  699.96   57.58
  -7  -5  -7 1320.56   98.86
   7  -5   7  827.65   65.77
  -7   5  -8  181.69   28.86
  -7  -5  -8  250.26   33.09
   7  -5   8  195.38   27.38
  -7   5  -9    5.49   13.59
   7  -5   9   14.46    8.26
  -7   5 -10   18.35   12.45
  -7  -5 -10    2.79    6.06
   7  -5  10   11.12    9.47
  -7   5 -11  910.63   73.43
  -7  -5 -11 1394.96  104.64
   7  -5  11  976.62   79.20
  -7   5 -12   52.75   13.50
  -7  -5 -12   65.52   14.94
   7  -5  12   32.45   16.93
  -7   5 -13   10.53   12.91
  -7  -5 -13   16.17    7.66
   7  -5  13   19.75   12.98
  -7   5 -14   44.34   19.62
  -7  -5 -14   95.29   17.90
   7  -5  14   23.63   17.18
  -7   5 -15  466.25   53.68
  -7  -5 -15  627.83   61.95
   7  -5  15  499.94   51.93
  -7   6  14  110.66   31.05
  -7  -6  14  134.71   31.43
  -7  -6  14  117.50   25.74
  -7   6  13  320.54   44.15
  -7  -6  13  320.58   40.89
  -7  -6  13  316.57   28.16
  -7   6  12  283.94   50.25
  -7  -6  12  259.09   38.89
  -7  -6  12  300.67   45.21
  -7   6  11   15.11   16.19
  -7  -6  11   14.42   13.17
  -7  -6  11   15.86   11.16
  -7   6  10  357.54   48.98
  -7  -6  10  500.15   51.02
  -7  -6  10  548.35   49.56
  -7   6   9  608.75   52.38
  -7  -6   9  693.42   58.92
  -7  -6   9  777.65   61.77
  -7   6   8  249.61   34.76
  -7  -6   8  411.09   43.03
  -7  -6   8  355.95   35.34
  -7   6   7   37.89   12.28
  -7  -6   7   66.90   15.50
  -7  -6   7   50.10   14.51
  -7   6   6  734.18   58.84
  -7  -6   6  773.04   64.11
  -7  -6   6  937.63   70.66
  -7   6   5  390.50   42.59
  -7  -6   5  519.47   56.92
  -7  -6   5  442.78   45.97
  -7   6   4  566.03   47.76
  -7  -6   4  549.92   48.13
  -7  -6   4  529.89   41.13
  -7   6   3  270.87   23.23
  -7   6   3  246.93   25.91
  -7  -6   3  314.55   33.06
  -7  -6   3  286.09   24.12
  -7   6   2  913.17   38.51
  -7   6   2 1014.42   45.97
  -7  -6   2 1066.04   51.71
  -7  -6   2 1092.69   40.20
  -7   6   1  378.68   40.34
  -7   6   1  340.94   38.89
  -7  -6   1  481.76   54.73
  -7  -6   1  347.16   34.91
  -7   6   0    9.40    7.73
  -7  -6   0   13.54    8.13
  -7  -6   0    2.70    2.34
   7  -6   0    2.87    4.05
  -7   6  -1  481.04   30.45
  -7  -6  -1  693.18   39.43
   7  -6   1  544.10   30.01
  -7   6  -2 1579.87  114.37
  -7  -6  -2 2307.14  163.50
   7  -6   2 1708.11  123.53
  -7   6  -3  256.79   27.61
  -7  -6  -3  475.42   41.58
   7  -6   3  369.79   34.03
  -7   6  -4    9.58    7.50
  -7  -6  -4    4.34    4.02
  -7   6  -5  174.04   25.81
  -7  -6  -5  250.72   32.43
   7  -6   5  212.87   27.63
  -7  -6  -6 1449.64   87.73
   7  -6   6  942.87   60.23
  -7   6  -7   33.42   18.66
  -7  -6  -7   96.32   20.36
   7  -6   7   79.74   24.56
  -7   6  -8   72.00   19.67
  -7  -6  -8  116.70   25.36
   7  -6   8   59.02   17.80
  -7   6  -9  517.65   59.30
  -7  -6  -9  796.43   85.78
   7  -6   9  615.74   36.46
  -7   6 -10  288.88   43.09
  -7  -6 -10  415.51   50.84
   7  -6  10  281.20   45.86
  -7   6 -11   26.12   16.84
  -7  -6 -11   21.26   12.53
   7  -6  11    9.55   11.62
  -7   6 -12   89.05   20.58
  -7  -6 -12  199.00   29.10
   7  -6  12  147.88   23.62
  -7   6 -13  183.08   34.69
  -7  -6 -13  253.73   31.03
   7  -6  13  210.98   29.75
  -7   7  12  203.16   30.08
  -7  -7  12  206.59   33.38
  -7  -7  12  214.78   29.97
  -7   7  11  111.33   22.10
  -7  -7  11  150.04   23.12
  -7  -7  11  182.38   24.27
  -7   7  10  344.35   39.76
  -7  -7  10  374.82   43.15
  -7  -7  10  347.27   26.39
  -7   7   9    2.70    6.91
  -7  -7   9   16.87   11.21
  -7  -7   9    7.38    4.28
  -7   7   8  622.05   48.11
  -7  -7   8  829.08   64.43
  -7  -7   8  803.87   57.19
  -7   7   7  234.85   31.39
  -7  -7   7  313.44   43.56
  -7  -7   7  251.55   33.41
  -7   7   6  159.30   31.48
  -7  -7   6  156.40   31.30
  -7  -7   6  162.91   28.45
  -7   7   5   18.12   12.48
  -7  -7   5   45.70   19.18
  -7  -7   5   21.07    5.98
  -7   7   4 1093.04   74.13
  -7  -7   4 1255.68   87.67
  -7   7   3  308.33   45.92
  -7  -7   3  323.35   43.86
   7  -7  -3  331.39   38.21
  -7   7   2   38.35   14.73
  -7   7   2   53.28   11.27
  -7  -7   2   39.55   13.55
  -7   7   1   40.17   15.15
  -7  -7   1   40.01   20.63
   7  -7  -1   32.04    9.30
  -7   7   0 1211.62   69.40
  -7  -7   0 1505.73   88.95
   7  -7   0 1358.64   77.75
  -7   7  -1  148.75   22.95
  -7  -7  -1  219.50   33.73
   7  -7   1  147.51   23.79
  -7   7  -2   15.32   10.22
  -7  -7  -2   31.73   19.90
   7  -7   2   15.65   17.82
  -7   7  -3  421.92   45.10
  -7  -7  -3  641.51   59.63
   7  -7   3  442.64   44.59
  -7   7  -4  980.27   69.02
  -7  -7  -4 1434.97   95.77
   7  -7   4  991.12   68.88
  -7   7  -5  277.18   36.41
  -7  -7  -5  380.37   40.94
   7  -7   5  289.32   36.18
  -7   7  -6   62.54   18.35
  -7  -7  -6  147.56   30.49
   7  -7   6  115.24   24.22
  -7   7  -7   87.64   23.43
  -7  -7  -7  180.96   18.04
   7  -7   7   79.74   17.56
  -7   7  -8  484.34   52.86
  -7  -7  -8  948.37   68.93
   7  -7   8  626.60   52.80
  -7   7  -9   32.21   27.33
  -7  -7  -9   70.79   25.27
   7  -7   9   18.79   14.30
  -7   7 -10  257.75   35.62
  -7  -7 -10  483.73   47.62
   7  -7  10  322.45   43.32
  -7   7 -11  201.01   29.24
  -7  -7 -11  243.27   29.39
   7  -7  11  166.00   28.57
  -7   7 -12  137.63   28.53
  -7  -7 -12  255.02   37.17
   7  -7  12  164.95   29.46
  -7  -8  10   10.20   13.38
  -7  -8   9  626.54   72.00
  -7   8   8   12.95   10.43
  -7  -8   8   20.27   15.57
  -7   8   7  134.34   37.81
  -7  -8   7  173.75   39.70
  -7   8   6   25.91   17.56
  -7  -8   6   29.61   14.61
  -7   8   5  702.30   56.11
  -7  -8   5  730.22   57.42
  -7   8   4   49.56   14.52
  -7  -8   4   50.86   16.06
  -7  -8   3  286.06   43.87
   7  -8  -3  202.76   28.47
  -7  -8   2   16.46   11.00
   7  -8  -2   14.38    5.09
   7  -8  -2   11.78   11.13
  -7  -8   1  556.01   57.69
   7  -8  -1  551.94   48.88
  -7   8   0    6.76    4.68
  -7  -8   0   15.47   10.44
   7  -8   0    9.23    9.92
  -7   8  -1  388.37   28.51
  -7  -8  -1  484.86   33.50
   7  -8   1  436.30   43.68
  -7   8  -2   26.05   16.83
  -7  -8  -2   79.28   17.35
   7  -8   2   62.02   16.66
  -7   8  -3  283.09   38.99
  -7  -8  -3  442.17   55.83
   7  -8   3  298.98   38.92
  -7   8  -4    6.15   12.54
  -7  -8  -4   17.51    8.26
   7  -8   4    4.26    5.21
  -7   8  -5  594.12   51.21
  -7  -8  -5  681.56   82.24
   7  -8   5  541.80   44.76
  -7   8  -6   17.56    7.36
  -7  -8  -6   65.09   17.94
   7  -8   6   35.14   23.44
  -7   8  -7  119.20   22.92
  -7  -8  -7  104.98   25.80
   7  -8   7  111.34   25.61
  -7   8  -8   11.98   12.38
  -7  -8  -8   15.14    9.31
   7  -8   8   24.78   11.40
  -7   8  -9  783.56   74.87
  -7  -8  -9 1400.48  115.91
   7  -8   9  906.04   80.95
  -7  -9   6  124.72   34.08
  -7  -9   5   15.52   12.59
  -7  -9   4  568.82   66.91
  -7  -9   3   44.55   20.99
   7  -9  -3   10.40    9.10
  -7  -9   2   21.66   10.13
   7  -9  -2   15.59   11.84
  -7  -9   1    8.03   12.19
   7  -9  -1   11.71    9.08
  -7  -9   0  754.02   67.45
   7  -9   0  656.95   55.50
   7  -9   0  526.49   47.97
  -7  -9  -1   35.27   12.50
   7  -9   1   35.68   13.90
   7  -9   1   33.59   13.44
  -7   9  -2    7.62   10.87
  -7  -9  -2    7.61    8.63
   7  -9   2    6.95    4.91
  -7   9  -3   16.92    4.29
  -7  -9  -3   23.69   16.30
   7  -9   3   17.25   15.69
  -7   9  -4  415.57   54.59
  -7  -9  -4  574.91   67.14
   7  -9   4  345.99   47.61
  -7   9  -5    2.94   12.65
  -7  -9  -5   18.57   14.88
   7  -9   5   16.52    8.69
  -7   9  -6   68.39   29.58
  -7  -9  -6   50.94   23.09
   7  -9   6   76.89   29.33
  -8   0  17   10.07    8.91
  -8   0  16  744.10   65.75
  -8   0  14   47.39   26.67
  -8   0  13    6.67    8.29
  -8   0  12 1222.35   87.77
  -8   0  12 1061.49   81.90
  -8   0  11    1.41    2.38
  -8   0  11   11.50    4.93
  -8   0  10  132.57   14.75
  -8   0  10   99.40   18.86
  -8   0   9    4.74    6.68
  -8   0   8 3680.64  178.42
  -8   0   8 2630.22  134.17
  -8   0   7    4.70    3.92
  -8   0   7   15.84    6.47
  -8   0   6 1408.69  101.50
  -8   0   6 1117.10   67.66
  -8   0   5   10.40    9.17
  -8   0   5   10.66   10.80
  -8   0   4 5791.70  298.07
  -8   0   3    6.50    9.53
  -8   0   3    8.09    5.05
  -8   0   2 2749.68  145.12
  -8   0   2 1845.33   99.52
  -8   0   1    8.77    7.04
  -8   0   1   13.07    9.13
  -8   0   0 4900.64  294.50
  -8   0   0 3119.82  189.68
  -8   0  -1    9.46    8.80
  -8   0  -1    4.03    3.40
  -8   0  -2 6397.44  327.72
  -8   0  -2 4421.88  228.10
  -8   0  -3   17.17    8.93
  -8   0  -3    2.62    5.78
  -8   0  -4 2455.93  131.34
   8   0   5    3.97    4.15
  -8   0  -6 5619.07  255.88
   8   0   6 4198.15  192.23
  -8   0  -7   10.78    5.15
   8   0   7    6.20    9.98
  -8   0  -8    9.25    8.45
   8   0   8    7.75   10.51
  -8   0  -9    6.32    7.86
   8   0   9    7.67   11.19
  -8   0 -10 2017.46   78.26
   8   0  10 1862.99   70.81
   8   0  11    6.97    7.15
  -8   0 -12   97.54   23.95
   8   0  12   84.25   20.19
  -8   0 -13    2.15    4.45
  -8   0 -14 1069.28   90.69
   8   0  14 1201.73   98.30
  -8   0 -15    3.67    8.04
   8   0  15   12.94   16.38
  -8   0 -16    7.84    5.37
   8   0  16    9.85   12.82
  -8   0 -17    4.07    9.30
   8   0  17   16.71   17.45
  -8   1  17  578.90   59.19
  -8  -1  17  566.72   55.65
  -8   1  16   25.03   18.56
  -8  -1  16   20.44   20.13
  -8   1  15  465.43   65.54
  -8  -1  15  419.28   53.87
  -8   1  14  108.18   26.01
  -8  -1  14  123.86   27.61
  -8   1  13  654.55   51.99
  -8  -1  13  783.33   53.32
  -8  -1  13  705.09   55.38
  -8   1  12   15.69   18.19
  -8  -1  12   26.31    9.96
  -8  -1  12   14.69   18.19
  -8   1  11 1565.76  115.69
  -8  -1  11 2026.72  141.40
  -8  -1  11 1621.71  120.80
  -8   1  10  421.13   41.11
  -8   1  10  295.01   37.38
  -8  -1  10  343.00   37.76
  -8  -1  10  303.13   35.85
  -8   1   9  467.32   38.34
  -8   1   9  352.00   35.10
  -8  -1   9  426.42   37.76
  -8  -1   9  417.24   40.14
  -8   1   8    4.32    3.87
  -8   1   8   13.57    7.76
  -8   1   8    5.78    7.42
  -8  -1   8    3.51    6.17
  -8  -1   8   12.73   11.00
  -8   1   7 4165.66  186.58
  -8   1   7 2810.40  133.85
  -8  -1   7 3588.77  164.32
   8  -1  -7 2966.86  133.78
  -8  -1   7 2832.45  134.51
  -8   1   6  218.05   21.02
  -8   1   6  157.22   20.84
  -8  -1   6  190.43   19.82
   8  -1  -6  152.58   14.07
  -8  -1   6  152.41   18.36
  -8   1   5  679.89   51.38
  -8   1   5  425.70   36.40
  -8  -1   5  688.42   52.97
   8  -1  -5  517.35   39.71
  -8  -1   5  463.96   38.74
  -8   1   4 2463.27  129.26
  -8   1   4 1719.26   95.50
  -8  -1   4 2428.95  128.15
  -8  -1   4 1713.28   94.02
  -8   1   3 3959.17  203.39
  -8   1   3 2726.34  144.89
  -8  -1   3 3928.05  203.38
  -8  -1   3 2716.72  143.37
  -8   1   2 1005.00   67.34
  -8   1   2  739.40   51.91
  -8  -1   2 1159.49   77.79
  -8  -1   2  762.85   53.54
  -8   1   1   45.26   11.62
  -8   1   1   37.58    9.58
  -8  -1   1   60.76   12.46
  -8  -1   1   35.30    8.50
  -8   1   0  480.46   35.52
  -8   1   0  345.44   29.22
  -8  -1   0  623.21   45.62
  -8  -1   0  364.80   28.81
  -8   1  -1 4111.94  212.66
  -8   1  -1 2947.37  154.97
  -8  -1  -1 4943.21  255.03
  -8  -1  -1 2992.62  155.81
  -8   1  -2  186.09   27.82
  -8   1  -2  192.93   21.25
  -8  -1  -2  256.45   28.15
  -8  -1  -2  140.08   20.39
  -8   1  -3   18.67    8.94
  -8   1  -3   14.66    6.21
  -8  -1  -3   39.29   12.45
  -8  -1  -3   10.96    4.89
  -8   1  -4  805.26   63.03
  -8  -1  -4  914.67   70.21
   8  -1   4  688.08   53.64
  -8   1  -5 5519.82  297.21
   8   1   5 4489.88  241.05
  -8  -1  -5 6558.90  352.03
   8  -1   5 4358.74  235.95
  -8   1  -6   91.97   17.50
   8   1   6   66.17   10.38
  -8  -1  -6   91.42   14.69
   8  -1   6   81.90   14.37
  -8   1  -7 1089.52   62.55
   8   1   7  926.43   62.83
  -8  -1  -7 1261.21   86.63
   8  -1   7  914.19   64.82
  -8   1  -8   13.74    7.19
   8   1   8   38.84   12.40
  -8  -1  -8   68.33   35.57
   8  -1   8   16.31   14.02
  -8   1  -9 1706.97   95.84
   8   1   9 1714.24   94.48
  -8  -1  -9 1947.97  106.52
   8  -1   9 1693.73   96.86
  -8   1 -10   90.07   16.00
   8   1  10   74.27   22.56
  -8  -1 -10  108.95   17.06
   8  -1  10   98.90   18.59
  -8   1 -11  705.40   58.04
   8   1  11  680.78   54.77
  -8  -1 -11  833.97   68.45
   8  -1  11  687.23   57.67
  -8   1 -12  445.35   56.26
   8   1  12  397.90   52.92
  -8  -1 -12  460.73   55.19
   8  -1  12  355.40   43.96
  -8   1 -13  723.44   67.37
   8   1  13  815.32   65.60
  -8  -1 -13  770.81   64.60
   8  -1  13  773.34   63.24
  -8   1 -14    5.47    5.42
   8   1  14    7.19    9.75
  -8  -1 -14    4.05   13.04
  -8   1 -15  468.93   49.62
   8   1  15  590.29   64.46
  -8  -1 -15  613.34   61.27
   8  -1  15  548.08   55.71
  -8   1 -16   13.35   10.78
   8   1  16   20.37   18.58
  -8  -1 -16   12.69    8.25
   8  -1  16   19.23    6.88
   8   1  17  102.24   22.02
  -8  -1 -17   85.30   29.75
   8  -1  17   82.89   29.78
  -8   2  17    9.53    8.76
  -8  -2  17   10.88   16.65
  -8   2  16  435.93   44.01
  -8  -2  16  515.71   51.74
  -8   2  15  208.86   34.64
  -8  -2  15  277.54   43.63
  -8   2  14   28.27   20.77
  -8  -2  14   60.57   17.85
  -8  -2  14   43.45   15.83
  -8   2  13  564.49   67.43
  -8  -2  13  572.91   61.89
  -8  -2  13  528.97   61.64
  -8   2  12  796.02   58.82
  -8  -2  12  844.56   52.32
  -8  -2  12  772.39   52.20
  -8   2  11  302.56   36.18
  -8  -2  11  391.01   42.78
  -8  -2  11  314.18   38.59
  -8   2  10   68.73   14.46
  -8  -2  10   72.52   14.54
  -8  -2  10   51.82    9.74
  -8   2   9  968.14   49.00
  -8  -2   9 1073.43   45.40
  -8  -2   9 1043.89   48.41
  -8   2   8 1453.38   73.29
  -8   2   8 1733.35   87.13
  -8   2   8 1448.09   83.24
  -8  -2   8 1691.54   92.30
  -8  -2   8 1488.71   84.09
  -8   2   7  501.30   34.06
  -8   2   7  406.15   34.35
  -8  -2   7  471.67   37.32
   8  -2  -7  421.15   27.99
  -8  -2   7  405.20   33.62
  -8   2   6  336.67   25.49
  -8   2   6  266.33   26.75
  -8  -2   6  319.70   28.85
   8  -2  -6  298.23   22.87
  -8  -2   6  319.92   30.43
  -8   2   5 2402.16  130.16
  -8   2   5 1961.57  111.59
   8  -2  -5 2536.23  136.19
  -8  -2   5 2582.72  144.08
  -8  -2   5 2109.85  118.22
  -8   2   4 2638.81  142.15
  -8   2   4 2190.81  123.11
   8  -2  -4 3167.52  169.78
  -8  -2   4 3026.54  165.76
  -8  -2   4 2389.38  133.66
  -8   2   3    7.48    5.59
  -8   2   3    4.38    6.04
  -8  -2   3    8.99    9.87
   8  -2  -3   18.20    5.42
  -8  -2   3    5.26    6.06
  -8   2   2  246.47   20.71
  -8   2   2  168.53   21.03
  -8  -2   2  287.40   25.08
  -8  -2   2  204.24   18.75
  -8   2   1 1373.37   90.05
  -8   2   1 1156.47   78.28
  -8  -2   1 1687.95  110.64
  -8  -2   1 1226.05   81.03
  -8   2   0  303.72   24.44
  -8   2   0  229.83   22.71
  -8  -2   0  336.22   29.00
  -8  -2   0  236.09   20.01
  -8   2  -1   63.97   13.07
  -8   2  -1   57.91   13.42
  -8  -2  -1   85.61   17.15
  -8  -2  -1   50.71   10.78
  -8   2  -2 1677.90  148.64
  -8   2  -2 1352.56   92.08
  -8  -2  -2 2183.89  192.25
  -8  -2  -2 1374.06   89.74
  -8   2  -3  885.33   67.96
  -8   2  -3  731.28   58.10
  -8  -2  -3 1218.61   91.24
  -8  -2  -3  864.53   64.71
  -8   2  -4 1930.46  109.39
   8   2   4 1652.99   91.78
  -8  -2  -4 2532.56  141.33
   8  -2   4 1590.77   91.95
  -8   2  -5 1408.53   73.26
   8   2   5 1347.80   65.56
  -8  -2  -5 1881.04   93.17
   8  -2   5 1320.08   68.91
  -8   2  -6 2145.78  105.35
   8   2   6 1955.47   92.38
  -8  -2  -6 2779.04  133.23
   8  -2   6 1946.00   96.42
  -8   2  -7  711.69   52.51
   8   2   7  647.24   48.61
  -8  -2  -7  960.22   67.14
   8  -2   7  610.33   48.63
  -8   2  -8  277.06   29.85
   8   2   8  272.89   26.54
  -8  -2  -8  349.31   35.24
   8  -2   8  270.72   30.87
  -8   2  -9  287.63   33.82
   8   2   9  255.93   28.55
  -8  -2  -9  383.20   42.71
   8  -2   9  295.32   34.33
  -8   2 -10  514.95   48.46
   8   2  10  501.24   42.38
  -8  -2 -10  635.69   92.77
   8  -2  10  488.36   42.93
  -8   2 -11  530.78  102.90
   8   2  11  521.68   99.76
  -8  -2 -11  594.56   50.77
   8  -2  11  560.91   49.53
  -8   2 -12   17.34    9.35
   8   2  12   14.32   10.61
  -8  -2 -12   12.93   10.86
   8  -2  12   12.10   16.92
  -8   2 -13  447.09   53.50
   8   2  13  409.15   49.40
  -8  -2 -13  510.28   58.79
   8  -2  13  430.13   54.03
  -8   2 -14  680.33   55.41
   8   2  14  689.84   52.77
  -8  -2 -14  742.94   56.91
   8  -2  14  686.93   61.70
  -8   2 -15   23.01    8.74
   8   2  15   41.91   11.55
  -8  -2 -15   12.52    8.93
   8  -2  15   27.92   15.64
  -8   2 -16   11.82   14.41
  -8  -2 -16   10.48    9.44
   8  -2  16    8.96   15.05
  -8   3  16   21.52   16.67
  -8  -3  16   12.27   16.26
  -8   3  15  162.58   33.30
  -8  -3  15  137.73   22.02
  -8  -3  15  129.02   30.29
  -8   3  14  661.67   57.75
  -8  -3  14  873.56   63.83
  -8  -3  14  881.65   68.37
  -8   3  13  142.39   27.92
  -8  -3  13  176.67   27.54
  -8  -3  13  156.66   27.58
  -8  -3  12    6.82    8.52
  -8  -3  12    7.42   10.11
  -8   3  11   14.84   15.95
  -8  -3  11   17.57   14.03
  -8  -3  11    7.03    6.04
  -8   3  10  689.47   59.95
  -8  -3  10  765.36   60.89
  -8  -3  10  665.51   55.55
  -8   3   9   79.99   15.44
  -8  -3   9   90.44   14.39
  -8  -3   9   76.30   18.23
  -8   3   8   13.88   10.15
  -8  -3   8    7.12    7.74
  -8  -3   8    6.49   11.11
  -8   3   7  279.15   22.52
  -8   3   7  270.58   28.24
  -8  -3   7  326.49   33.07
  -8  -3   7  338.00   32.89
  -8   3   6  583.13   38.01
  -8   3   6  620.12   46.82
   8  -3  -6  648.21   41.65
  -8  -3   6  698.75   50.73
  -8  -3   6  580.70   42.64
  -8   3   5   30.52    6.97
  -8   3   5   18.85   17.82
  -8  -3   5   31.83   15.54
   8  -3  -5   46.38    5.60
  -8  -3   5   57.00   10.46
  -8   3   4  906.67   64.66
  -8   3   4  796.16   60.50
   8  -3  -4 1281.15   88.82
  -8  -3   4  975.91   72.59
  -8  -3   4  879.76   65.37
  -8   3   3  174.39   16.03
  -8   3   3  157.33   22.23
   8  -3  -3  211.39   12.30
  -8  -3   3  208.71   21.52
  -8  -3   3  148.83   13.96
  -8   3   2 1324.31   74.65
  -8   3   2 1190.50   71.45
  -8  -3   2 1687.26   97.96
  -8  -3   2 1336.92   76.28
  -8   3   1    2.32    3.68
  -8   3   1   10.95    7.42
  -8  -3   1   14.61   10.34
  -8  -3   1    8.05    4.66
  -8   3   0  389.84   32.13
  -8   3   0  302.27   28.47
  -8  -3   0  531.95   44.03
  -8  -3   0  342.17   28.06
  -8   3  -1  873.82   66.32
  -8   3  -1  843.06   65.65
  -8  -3  -1 1230.76   92.05
  -8  -3  -1  898.95   66.33
  -8   3  -2 1119.88   31.39
  -8   3  -2 1075.10   65.54
  -8  -3  -2 1528.46   89.69
  -8  -3  -2 1083.37   61.80
  -8   3  -3   48.74   12.01
   8   3   3   31.15    7.22
  -8  -3  -3   49.49   12.99
  -8  -3  -3   41.26    6.78
   8  -3   3   39.69   24.00
  -8   3  -4 1711.67   85.16
   8   3   4 1721.21   80.63
  -8  -3  -4 2465.16  118.93
   8  -3   4 1730.50   86.83
  -8   3  -5  320.74   29.73
   8   3   5  304.69   23.48
  -8  -3  -5  438.17   37.58
   8  -3   5  275.12   26.86
   8   3   6 1620.13   81.65
  -8  -3  -6 2281.36  119.10
   8  -3   6 1643.25   88.94
  -8   3  -7   10.57   10.28
   8   3   7    2.28    7.18
  -8  -3  -7    9.00    7.73
   8  -3   7    6.44   10.47
  -8   3  -8  229.36   29.39
   8   3   8  285.10   30.50
  -8  -3  -8  407.70   47.30
   8  -3   8  238.76   32.69
  -8   3  -9   20.53   10.59
   8   3   9   53.19    9.07
  -8  -3  -9   60.46   16.36
   8  -3   9   52.63   13.62
  -8   3 -10  143.58   22.69
   8   3  10  211.22   24.64
  -8  -3 -10  223.77   29.77
   8  -3  10  184.51   32.74
  -8   3 -11  182.43   28.20
   8   3  11  193.43   24.31
  -8  -3 -11  216.45   31.78
   8  -3  11  183.52   28.52
  -8   3 -12 1229.29   95.32
   8   3  12 1439.43  104.69
  -8  -3 -12 1634.63  123.09
   8  -3  12 1494.96  113.54
  -8   3 -13  198.47   32.32
  -8  -3 -13  253.62   34.56
   8  -3  13  189.40   37.47
  -8   3 -14   25.46   15.81
  -8  -3 -14    6.26    6.82
   8  -3  14   13.61   17.94
  -8   3 -15   15.67    9.78
  -8  -3 -15   10.84    9.01
   8  -3  15   18.44   15.23
  -8   3 -16  574.48   57.46
  -8  -3 -16  788.60   71.56
   8  -3  16  768.39   71.59
  -8   4  15  317.71   41.79
  -8  -4  15  354.16   45.16
  -8  -4  15  410.19   53.62
  -8   4  14   13.21   10.80
  -8  -4  14   16.27   12.82
  -8  -4  14    8.09    4.96
  -8   4  13  540.99   47.20
  -8  -4  13  603.50   73.83
  -8  -4  13  551.88   65.59
  -8   4  12    6.05    9.30
  -8  -4  12    2.09    7.69
  -8  -4  12   10.95    7.62
  -8   4  11  574.17   45.34
  -8  -4  11  758.04   56.96
  -8  -4  11  708.33   54.44
  -8   4  10    6.51   13.67
  -8  -4  10   25.77   20.27
  -8  -4  10   11.92   10.88
  -8   4   9  859.27   67.93
  -8  -4   9  943.62   74.60
  -8  -4   9  933.17   72.47
  -8   4   8  285.97   32.12
  -8  -4   8  332.92   33.25
  -8  -4   8  331.47   30.99
  -8   4   7  322.47   36.87
  -8  -4   7  426.62   47.00
  -8  -4   7  418.03   49.05
  -8   4   6  176.66   15.69
  -8   4   6  192.45   27.79
  -8  -4   6  215.77   29.22
  -8  -4   6  196.21   22.00
  -8   4   5 2066.47  104.89
  -8   4   5 1780.89  101.26
  -8  -4   5 2406.86  129.71
  -8  -4   5 2058.29  109.34
  -8   4   4   32.81    6.54
  -8   4   4   33.25    9.97
   8  -4  -4   25.75    7.28
  -8  -4   4   45.36   13.02
  -8  -4   4   28.25    6.65
  -8   4   3  211.12   17.66
  -8   4   3  197.91   20.84
  -8  -4   3  242.32   25.33
  -8  -4   3  208.46   19.25
  -8   4   2   12.34    6.15
  -8   4   2   11.09    9.51
  -8  -4   2    7.06    7.24
  -8  -4   2   14.40    7.88
  -8   4   1 2987.30  147.40
  -8   4   1 2956.77  149.45
  -8  -4   1 3900.50  194.02
  -8  -4   1 3130.36  152.89
  -8   4   0   23.54    7.48
  -8   4   0   14.01    9.63
  -8  -4   0   16.42   12.04
  -8  -4   0   28.76    8.84
  -8   4  -1  140.54   16.47
   8   4   1  150.23   10.67
  -8   4  -1  145.27   19.24
  -8  -4  -1  110.31    9.11
  -8  -4  -1  194.31   18.95
  -8   4  -2   81.11   40.10
   8   4   2  105.19    9.48
  -8   4  -2  109.54   14.38
  -8  -4  -2   90.91    9.15
  -8  -4  -2  132.37   17.65
  -8   4  -3 2435.61  124.35
   8   4   3 3044.09  146.79
  -8  -4  -3 3745.82  187.45
   8  -4   3 2393.62  123.70
  -8   4  -4  103.02   30.97
   8   4   4  144.13   13.98
   8   4   4  114.02    8.26
  -8  -4  -4  170.23   22.52
   8  -4   4   98.94   14.88
  -8   4  -5  435.77   41.03
   8   4   5  420.69   35.39
  -8  -4  -5  660.57   60.27
   8  -4   5  407.95   39.20
  -8   4  -6    1.82    5.82
   8   4   6    4.22    4.47
   8  -4   6    5.54    7.62
  -8   4  -7  654.86   37.78
   8   4   7  672.67   27.49
   8  -4   7  594.96   33.87
  -8   4  -8  303.00   30.86
   8   4   8  357.25   27.21
  -8  -4  -8  443.99   39.99
   8  -4   8  314.29   32.56
  -8   4  -9  870.38   70.39
  -8  -4  -9 1341.65  102.04
   8  -4   9  892.55   70.81
  -8   4 -10  123.75   32.29
  -8  -4 -10  136.23   25.37
   8  -4  10  109.93   32.89
  -8   4 -11  860.95   71.91
  -8  -4 -11 1263.64   98.57
   8  -4  11  908.83   75.95
  -8   4 -12    9.15    9.61
  -8  -4 -12    4.90    6.68
   8  -4  12   19.61   13.15
  -8   4 -13  226.73   40.01
  -8  -4 -13  428.86   33.18
   8  -4  13  342.57   40.68
  -8   4 -14   18.40    9.40
  -8  -4 -14   22.87   17.94
   8  -4  14   20.49   13.46
  -8   4 -15  113.82   23.58
  -8  -4 -15  139.38   26.52
   8  -4  15  127.30   31.75
  -8   5  14  663.96   76.11
  -8  -5  14  759.73   84.83
  -8  -5  14  836.70   92.09
  -8   5  13   23.58   19.55
  -8  -5  13   23.02   13.24
  -8  -5  13   15.71   14.07
  -8   5  12    8.97   13.29
  -8  -5  12   19.44   17.67
  -8  -5  12   16.11   11.38
  -8   5  11  221.26   31.99
  -8  -5  11  188.21   39.12
  -8  -5  11  175.87   27.96
  -8   5  10 1030.57   79.72
  -8  -5  10 1047.16   81.78
  -8  -5  10 1145.91   87.96
  -8   5   9  102.60   20.95
  -8  -5   9   82.58   19.50
  -8  -5   9  135.07   24.07
  -8   5   8  516.43   41.96
  -8  -5   8  642.06   49.42
  -8  -5   8  597.60   42.05
  -8   5   7   97.67   23.03
  -8  -5   7   84.19   21.42
  -8  -5   7   93.59   19.39
  -8   5   6 1826.41  132.53
  -8  -5   6 2270.61  163.23
  -8  -5   6 2123.23  149.18
  -8   5   5   35.99   10.48
  -8   5   5   48.46   13.85
  -8  -5   5   55.29   16.33
  -8  -5   5   45.87   10.81
  -8   5   4  315.14   56.74
  -8   5   4  299.06   34.69
  -8  -5   4  347.67   40.34
  -8  -5   4  325.61   34.65
  -8   5   3  131.22   17.02
  -8   5   3  156.30   22.56
  -8  -5   3  155.37   22.67
  -8  -5   3  143.00   17.58
  -8   5   2 1197.72   67.70
  -8   5   2 1258.23   72.96
  -8  -5   2 1685.81   97.86
  -8  -5   2 1378.13   73.61
  -8   5   1    7.78    4.02
  -8   5   1    7.79    7.85
  -8  -5   1    2.97    8.67
  -8  -5   1    3.01    3.94
  -8   5   0 2588.93  135.13
  -8   5   0 2428.33  130.21
  -8  -5   0 3350.56  175.84
  -8  -5   0 2675.97  135.67
  -8   5  -1  217.70   23.57
  -8   5  -1  241.41   28.01
  -8  -5  -1  262.83   29.65
  -8  -5  -1  221.06   20.02
  -8   5  -2  832.25   41.39
  -8  -5  -2 1215.87   54.16
  -8  -5  -2  807.96   28.52
   8  -5   2  838.09   44.82
  -8   5  -3   71.58   25.03
   8   5   3   64.77    7.42
  -8  -5  -3   77.78   17.28
   8  -5   3   77.87   16.62
  -8   5  -4  958.85   44.57
  -8  -5  -4 1570.27   64.73
   8  -5   4 1074.46   50.65
  -8   5  -5   10.59   10.77
  -8  -5  -5   25.66   15.56
   8  -5   5   20.24   12.26
  -8   5  -6  140.88   24.37
  -8  -5  -6  196.08   28.06
   8  -5   6  127.70   26.12
  -8   5  -7  136.73   28.12
  -8  -5  -7  191.19   30.27
   8  -5   7  152.37   24.07
  -8   5  -8 1712.34   99.35
  -8  -5  -8 2740.75  147.53
   8  -5   8 1759.63   99.79
  -8   5  -9  168.28   27.12
  -8  -5  -9  345.77   39.78
   8  -5   9  215.96   29.66
  -8   5 -10   22.43   17.70
  -8  -5 -10   18.01   13.92
   8  -5  10   13.71   18.23
  -8   5 -11   36.87   16.85
  -8  -5 -11   58.05   14.34
   8  -5  11   33.78   10.13
  -8   5 -12  719.86   70.47
  -8  -5 -12 1079.60   98.52
   8  -5  12  898.38   85.51
  -8   5 -13   10.37    9.07
  -8  -5 -13   35.84   14.11
   8  -5  13   11.31    9.54
  -8   5 -14    6.44    9.63
  -8  -5 -14   22.78   13.48
   8  -5  14    8.86   13.30
  -8   6  13  102.79   19.19
  -8  -6  13  139.91   29.91
  -8  -6  13  100.01   24.16
  -8   6  12  319.94   34.24
  -8  -6  12  329.78   40.49
  -8  -6  12  263.73   34.65
  -8   6  11   99.75   19.17
  -8  -6  11  134.98   26.01
  -8  -6  11  127.30   25.36
  -8   6  10   98.90   20.75
  -8  -6  10   84.11   21.02
  -8  -6  10   59.55   13.82
  -8   6   9  524.19   48.65
  -8  -6   9  456.46   55.66
  -8  -6   9  557.10   49.59
  -8   6   8  544.93   62.73
  -8  -6   8  587.77   66.21
  -8  -6   8  552.92   60.02
  -8   6   7   87.04   18.95
  -8  -6   7  109.81   25.81
  -8  -6   7  133.14   21.90
  -8   6   6  125.47   48.50
  -8  -6   6  182.43   33.90
  -8  -6   6  114.59   19.37
  -8   6   5  722.12   50.04
  -8  -6   5  932.55   61.21
  -8  -6   5  841.02   50.46
  -8   6   4  524.12   41.16
  -8   6   4  526.21   46.83
  -8  -6   4  645.51   56.74
  -8  -6   4  623.92   48.42
  -8   6   3  277.74   31.54
  -8   6   3  279.37   33.49
  -8  -6   3  364.82   48.60
  -8  -6   3  359.62   37.89
  -8   6   2  447.32   89.46
  -8   6   2  537.35   45.84
  -8  -6   2  584.35   51.14
  -8  -6   2  522.95   40.32
  -8   6   1  733.38   57.65
  -8   6   1  740.92   61.08
  -8  -6   1  921.16   74.22
  -8   6   0  605.24   48.08
  -8  -6   0  692.89   59.90
  -8   6  -1  102.59   24.37
  -8  -6  -1  125.34   26.52
   8  -6   1  106.37   26.19
  -8   6  -2  362.01   40.64
  -8  -6  -2  573.38   61.67
   8  -6   2  495.36   44.27
  -8   6  -3 1027.19   79.31
  -8  -6  -3 1600.04  119.39
   8  -6   3 1139.00   86.63
  -8   6  -4   79.97   21.09
  -8  -6  -4  132.13   26.56
   8  -6   4  117.01   19.99
  -8   6  -5   13.94    9.55
  -8  -6  -5   17.86   10.11
   8  -6   5   10.35   12.23
  -8   6  -6  498.12   42.30
  -8  -6  -6  961.02   68.98
   8  -6   6  673.67   53.11
  -8   6  -7  665.32   58.94
  -8  -6  -7 1376.70  104.79
   8  -6   7  878.06   72.51
  -8   6  -8   69.37   20.86
  -8  -6  -8   88.00   22.58
   8  -6   8   67.58   19.87
  -8   6  -9  131.72   25.37
  -8  -6  -9  219.45   31.22
   8  -6   9  172.53   30.41
  -8   6 -10  357.44   60.40
  -8  -6 -10  752.04   86.52
   8  -6  10  488.91   61.26
  -8   6 -11  216.45   38.30
  -8  -6 -11  398.95   47.63
   8  -6  11  284.15   38.20
  -8   6 -12   31.20   15.13
  -8  -6 -12   33.62   14.50
   8  -6  12   22.51   10.86
  -8   6 -13  179.39   32.66
  -8  -6 -13  245.95   34.61
   8  -6  13  210.74   33.97
  -8   7  11  298.20   39.28
  -8  -7  11  370.21   44.47
  -8  -7  11  417.01   43.25
  -8   7  10  145.31   22.02
  -8  -7  10  192.61   27.87
  -8  -7  10  158.64   22.44
  -8   7   9  138.73   25.60
  -8  -7   9  145.08   27.66
  -8  -7   9  139.21   22.31
  -8   7   8   30.31   17.40
  -8  -7   8   35.45   22.66
  -8  -7   8   11.41    5.99
  -8   7   7  709.03   56.60
  -8  -7   7  836.19   64.38
  -8  -7   7  812.49   57.30
  -8   7   6  241.51   38.97
  -8  -7   6  283.77   39.29
  -8  -7   6  223.27   28.61
  -8   7   5   33.33   12.66
  -8  -7   5   36.10   19.31
  -8   7   4    3.50    5.52
  -8  -7   4   32.31   14.53
  -8   7   3  898.76   70.20
  -8  -7   3 1151.48   90.09
  -8   7   2  195.41   23.39
  -8   7   2  151.02   24.64
  -8  -7   2  193.58   31.24
  -8   7   1    8.26   12.50
  -8  -7   1   13.67   10.24
   8  -7  -1   14.89   11.87
  -8   7   0  253.48   27.56
   8  -7   0  239.75   27.84
  -8   7  -1  563.39   45.17
  -8  -7  -1  724.26   55.89
   8  -7   1  557.65   47.25
  -8   7  -2  214.73   29.79
  -8  -7  -2  321.05   38.52
   8  -7   2  252.80   32.78
  -8   7  -3   86.97   20.10
  -8  -7  -3   95.65   20.75
   8  -7   3   91.98   20.91
  -8   7  -4  140.11   29.02
  -8  -7  -4  205.41   36.97
   8  -7   4  138.19   29.72
  -8   7  -5  569.78   55.94
  -8  -7  -5  894.08   78.87
   8  -7   5  562.99   52.75
  -8   7  -6  115.02   23.72
  -8  -7  -6  187.07   36.66
   8  -7   6   76.90   22.44
  -8   7  -7  130.65   25.68
  -8  -7  -7  297.63   44.38
   8  -7   7  219.02   32.65
  -8   7  -8  198.01   36.32
  -8  -7  -8  323.06   48.32
   8  -7   8  265.50   39.82
  -8   7  -9  277.53   39.14
  -8  -7  -9  624.27   56.38
   8  -7   9  399.08   41.76
  -8   7 -10   49.61   29.33
  -8  -7 -10   69.85   20.17
   8  -7  10   81.43   24.15
  -8   7 -11  168.36   29.02
  -8  -7 -11  319.61   39.55
   8  -7  11  187.71   29.61
  -8   8   9   27.38   16.52
  -8  -8   9   27.54   13.27
  -8   8   8  645.19   72.56
  -8  -8   8  642.26   74.51
  -8   8   7   19.94   12.25
  -8  -8   7   20.83   17.94
  -8   8   6  127.07   23.24
  -8  -8   6  196.76   36.40
  -8   8   5   21.44   18.73
  -8  -8   5   35.94   26.50
  -8   8   4  397.49   43.03
  -8  -8   4  534.60   58.84
  -8  -8   3   26.52   14.21
   8  -8  -3    9.71    5.56
  -8  -8   2  389.89   51.39
   8  -8  -2  364.00   45.14
  -8   8   1   40.41   13.09
  -8  -8   1   36.12   24.55
   8  -8  -1   44.53   12.36
  -8   8   0  539.19   43.26
  -8  -8   0  781.69   66.73
   8  -8   0  596.81   46.95
  -8   8  -1   14.16    6.07
  -8  -8  -1   15.11   11.67
  -8   8  -2  448.78   57.69
  -8  -8  -2  577.78   72.00
   8  -8   2  519.17   31.22
  -8   8  -3   33.52   16.67
  -8  -8  -3   67.29   21.27
   8  -8   3   39.37   12.61
  -8   8  -4   90.54   22.44
  -8  -8  -4  136.89   26.07
   8  -8   4   90.65   22.38
  -8   8  -5    6.15   10.33
  -8  -8  -5   18.04   14.66
   8  -8   5   19.38   15.54
  -8   8  -6  604.22   54.27
  -8  -8  -6  825.03   72.08
   8  -8   6  562.53   52.50
  -8   8  -7   29.93   17.11
  -8  -8  -7   31.75   13.54
   8  -8   7   28.21    9.24
  -8   8  -8   26.35   27.94
  -8  -8  -8   67.79   25.40
   8  -8   8   67.27   26.87
  -8  -9   4   15.61   11.65
   8  -9  -4   10.23   11.07
  -8  -9   3  460.97   51.03
   8  -9  -3  306.66   34.61
  -8  -9   2   38.34   19.12
   8  -9  -2    8.78   16.29
  -8  -9   1   25.61   16.06
   8  -9  -1   11.40    7.19
  -8  -9   0   18.11   17.56
   8  -9   0   15.92   14.27
  -8   9  -1  525.85   60.53
  -8  -9  -1  681.06   77.68
   8  -9   1  529.38   63.61
  -8   9  -2   14.29    6.72
  -8  -9  -2   20.40   12.95
   8  -9   2   25.98   16.17
  -8   9  -3    8.28   12.43
  -8  -9  -3   15.79   10.30
   8  -9   3    4.90    8.76
  -8   9  -4   24.66   12.68
  -8  -9  -4    8.59   11.05
   8  -9   4    7.83   10.59
  -9   0  16   21.44   15.84
  -9   0  15 1355.94   59.71
  -9   0  14   10.65   11.77
  -9   0  13  100.49   24.73
  -9   0  12    3.56    9.86
  -9   0  11 2651.24  183.45
  -9   0  11 2057.83  150.31
  -9   0  10    4.28    6.11
  -9   0  10    7.82   12.78
  -9   0   9  977.22   38.87
  -9   0   9  686.53   37.81
  -9   0   8   15.29   13.81
  -9   0   8   11.15    7.67
  -9   0   7 2866.64  141.59
  -9   0   7 1830.28   99.78
  -9   0   6    9.45    8.10
  -9   0   6   11.56   12.57
  -9   0   5 2155.27  101.48
  -9   0   5 1506.13   77.12
  -9   0   4    2.39    4.40
  -9   0   4    6.02    8.49
  -9   0   3 1324.31   97.59
  -9   0   3  851.31   65.35
  -9   0   2    6.64    3.41
  -9   0   2    7.17    8.42
  -9   0   1 1298.64   95.23
  -9   0   1  870.56   66.00
  -9   0   0   14.28   11.78
  -9   0   0   10.82    5.99
  -9   0  -1   27.10   20.09
  -9   0  -1   15.95    9.98
  -9   0  -2    5.26    8.48
  -9   0  -2    6.24    8.61
  -9   0  -3 6418.22  344.13
  -9   0  -3 4163.53  225.37
  -9   0  -4    8.34    9.56
  -9   0  -5  245.69   25.26
   9   0   5  244.57   26.92
  -9   0  -6    7.38   11.45
  -9   0  -7 2512.80  134.71
   9   0   7 1854.81  101.46
  -9   0  -8   30.57    9.84
   9   0   8    1.93    5.47
  -9   0  -9   37.83   18.02
   9   0   9   15.99   14.80
  -9   0 -10   13.34    8.04
   9   0  10    5.69   11.96
  -9   0 -11 3165.41  168.92
   9   0  11 2974.08   61.69
  -9   0 -12    5.55   12.23
   9   0  12    5.27    5.67
  -9   0 -13   20.96   11.20
   9   0  13   13.36   10.07
  -9   0 -14   10.69   10.48
   9   0  14    6.26   14.13
  -9   0 -15  711.32   63.35
   9   0  15  789.21   67.62
  -9   0 -16    8.85    9.69
   9   0  16   13.28   12.32
  -9   1  16  536.30   64.29
  -9  -1  16  555.44   66.33
  -9   1  15   13.72   17.58
  -9  -1  15   13.73   10.43
  -9   1  14  321.50   43.11
  -9  -1  14  462.56   58.78
  -9   1  13  180.32   35.06
  -9  -1  13  227.39   43.92
  -9   1  12  307.86   36.01
  -9  -1  12  381.05   35.95
  -9  -1  12  301.89   36.49
  -9   1  11   38.64   16.15
  -9  -1  11   25.52   19.66
  -9  -1  11   27.27   12.37
  -9   1  10 1287.29   96.20
  -9  -1  10 1714.31  121.64
  -9  -1  10 1374.37  102.78
  -9   1   9  506.66   49.20
  -9   1   9  365.05   44.95
  -9  -1   9  481.23   49.69
  -9  -1   9  357.51   39.80
  -9   1   8  195.16   19.69
  -9   1   8  115.43   17.01
  -9  -1   8  165.55   18.36
  -9  -1   8  113.83   15.36
  -9   1   7  247.03   23.04
  -9   1   7  154.14   20.29
  -9  -1   7  185.69   20.94
  -9  -1   7  190.44   26.26
  -9   1   6 6002.10  287.19
  -9   1   6 4031.61  201.17
  -9  -1   6 4122.50  204.24
  -9   1   5  505.75   39.26
  -9   1   5  295.88   29.90
  -9  -1   5  455.94   38.75
  -9  -1   5  355.97   32.52
  -9   1   4  312.42   26.07
  -9   1   4  195.91   20.95
  -9  -1   4  301.82   27.41
  -9  -1   4  205.02   24.06
  -9   1   3  291.31   25.40
  -9   1   3  191.89   20.13
  -9  -1   3  340.97   30.71
  -9  -1   3  273.83   27.88
  -9   1   2 6847.92  363.89
  -9   1   2 4649.66  251.59
  -9  -1   2 7265.96  387.33
  -9  -1   2 4610.00  248.22
  -9   1   1    9.11    7.96
  -9   1   1    5.50   10.18
  -9  -1   1   13.29    7.18
  -9  -1   1    9.44   10.44
  -9   1   0    5.00    7.54
  -9   1   0    8.41    6.20
  -9  -1   0   43.58   16.26
  -9  -1   0   12.82    7.46
  -9   1  -1  749.51   58.34
  -9   1  -1  570.63   46.53
  -9  -1  -1  852.36   66.65
  -9  -1  -1  516.26   41.47
  -9   1  -2 7074.11  378.07
  -9   1  -2 4897.47  264.06
  -9  -1  -2 7921.44  422.94
  -9  -1  -2 5023.34  269.47
  -9   1  -3   10.03   11.15
  -9   1  -3    7.86    6.65
  -9  -1  -3   11.51   12.88
  -9  -1  -3    4.92    4.56
  -9   1  -4  486.64   40.87
  -9  -1  -4  584.70   48.18
  -9  -1  -4  335.04   28.87
   9  -1   4  393.75   35.08
  -9   1  -5  253.08   34.26
   9   1   5  251.54   23.89
  -9  -1  -5  308.18   30.92
   9  -1   5  183.90   21.46
  -9   1  -6 2935.75  149.35
   9   1   6 2593.13  130.13
  -9  -1  -6 3414.72  172.14
   9  -1   6 2541.99  130.28
  -9   1  -7   60.54   19.07
   9   1   7   23.37   16.82
  -9  -1  -7   64.73   15.13
   9  -1   7   34.95   21.94
  -9   1  -8  692.25   37.51
   9   1   8  716.23   37.60
  -9  -1  -8  797.78   43.77
   9  -1   8  635.95   33.72
  -9   1  -9  204.78   24.60
   9   1   9  236.67   32.42
  -9  -1  -9  222.73   25.73
   9  -1   9  241.13   27.04
  -9   1 -10  820.33   66.50
   9   1  10  711.88   56.11
  -9  -1 -10  936.90   74.71
   9  -1  10  735.36   59.23
  -9   1 -11   30.24   10.92
   9   1  11    4.57   11.91
  -9  -1 -11    5.59    9.35
   9  -1  11    1.34   11.28
  -9   1 -12 1142.71   79.72
   9   1  12 1269.11   84.75
  -9  -1 -12 1316.96   90.05
   9  -1  12 1140.71   78.69
  -9   1 -13  188.51   30.32
   9   1  13  141.02   22.25
  -9  -1 -13  157.47   26.16
   9  -1  13  136.25   25.44
  -9   1 -14  257.62   45.95
   9   1  14  264.40   52.48
  -9  -1 -14  309.31   45.51
   9  -1  14  295.59   45.25
  -9   1 -15   20.60   16.73
   9   1  15    1.92    8.98
  -9  -1 -15    8.24   10.62
   9  -1  15   18.36   10.59
  -9   1 -16  207.50   33.75
   9   1  16  210.13   30.59
  -9  -1 -16  178.35   39.05
   9  -1  16  171.80   37.11
  -9   2  16   32.61   16.53
  -9  -2  16   23.91   19.00
  -9   2  15  638.87   57.00
  -9  -2  15  656.33   60.33
  -9   2  14  115.53   31.46
  -9  -2  14  204.41   31.89
  -9   2  13   11.84    9.82
  -9  -2  13    9.26    9.93
  -9  -2  13    5.97    8.15
  -9   2  12  435.57   44.78
  -9  -2  12  457.74   47.66
  -9  -2  12  426.37   43.40
  -9   2  11  546.78   40.94
  -9  -2  11  581.32   41.82
  -9  -2  11  584.46   44.00
  -9   2  10  147.69   24.05
  -9  -2  10  207.52   26.86
  -9  -2  10  176.60   25.38
  -9   2   9  118.32   18.88
  -9  -2   9  166.14   19.29
  -9  -2   9   99.40   20.65
  -9   2   8  718.74   27.12
  -9   2   8  585.28   38.54
  -9  -2   8  775.00   38.55
  -9  -2   8  581.61   33.56
  -9   2   7  608.08   49.42
  -9   2   7  466.67   44.09
  -9  -2   7  659.48   57.13
  -9  -2   7  503.21   46.20
  -9   2   6  514.69   35.31
  -9   2   6  331.26   30.00
  -9  -2   6  496.44   37.60
   9  -2  -6  450.98   31.55
  -9  -2   6  394.45   33.47
  -9   2   5  225.31   21.56
  -9   2   5  178.61   20.62
   9  -2  -5  240.71   19.42
  -9  -2   5  242.77   24.21
  -9  -2   5  217.65   20.78
  -9   2   4 2489.54  115.60
  -9   2   4 2048.64  101.39
  -9  -2   4 2654.74  125.51
  -9  -2   4 2032.32   98.82
  -9   2   3  653.90   50.01
  -9   2   3  472.76   39.51
  -9  -2   3  723.08   55.42
  -9  -2   3  590.28   46.58
  -9   2   2    7.49    5.52
  -9   2   2   14.94    9.68
  -9  -2   2    3.63    3.56
  -9  -2   2    3.19    4.45
  -9   2   1  847.01   63.92
  -9   2   1  670.23   53.91
  -9  -2   1 1044.44   79.59
  -9  -2   1  716.54   55.10
  -9   2   0 1568.71   89.06
  -9   2   0 1304.05   77.99
  -9  -2   0 1919.23  109.30
  -9  -2   0 1356.23   77.22
  -9   2  -1  399.59   35.53
  -9   2  -1  363.58   31.24
  -9  -2  -1  635.43   50.00
  -9  -2  -1  350.89   28.59
  -9   2  -2   20.35   12.48
  -9   2  -2   16.23    9.73
  -9  -2  -2   23.75   14.42
  -9  -2  -2   11.07    7.36
  -9   2  -3 1423.03   72.70
  -9   2  -3 1178.08   65.29
  -9  -2  -3 1943.18   97.98
  -9  -2  -3 1237.88   61.71
  -9   2  -4 2101.12  102.54
  -9  -2  -4 2880.65  138.27
   9  -2   4 1918.59   95.14
  -9   2  -5  265.64   25.27
   9   2   5  261.92   22.79
  -9  -2  -5  339.86   31.28
   9  -2   5  268.19   25.85
  -9   2  -6  106.25   16.11
   9   2   6   86.49   11.03
  -9  -2  -6  119.78   26.55
   9  -2   6  117.08   22.29
  -9   2  -7 1092.29   66.25
   9   2   7 1039.69   58.83
  -9  -2  -7 1358.05   78.91
   9  -2   7  854.32   52.92
  -9   2  -8  249.30   31.84
   9   2   8  183.42   22.37
  -9  -2  -8  322.37   37.03
   9  -2   8  240.01   29.25
  -9   2  -9   19.43    9.97
   9   2   9    1.70    7.58
  -9  -2  -9   10.46    6.36
   9  -2   9   18.64    6.19
  -9   2 -10  182.84   25.86
   9   2  10  186.79   25.84
  -9  -2 -10  276.42   37.27
   9  -2  10  136.38   22.53
  -9   2 -11  695.68   53.38
   9   2  11  759.18   54.49
   9  -2  11  686.87   52.52
  -9   2 -12  338.78   42.74
   9   2  12  398.39   45.94
  -9  -2 -12  365.89   45.77
   9  -2  12  331.23   48.15
  -9   2 -13   33.65   15.35
   9   2  13    9.26    8.27
  -9  -2 -13   12.06   12.34
   9  -2  13    9.19   17.83
  -9   2 -14  188.82   33.27
   9   2  14  178.83   30.38
  -9  -2 -14  189.58   35.57
   9  -2  14  185.00   30.64
  -9   2 -15  207.22   30.34
  -9  -2 -15  286.01   34.17
   9  -2  15  207.11   28.60
  -9   3  15    5.84    6.41
  -9  -3  15   14.45   13.78
  -9   3  14   58.08   20.42
  -9  -3  14   59.29   22.00
  -9  -3  14   73.41   23.03
  -9   3  13  830.13   66.75
  -9  -3  13  945.91   66.62
  -9  -3  13  822.92   63.12
  -9   3  12   79.20   20.97
  -9  -3  12   89.83   20.21
  -9  -3  12   69.73   19.65
  -9   3  11   17.64    8.43
  -9  -3  11    7.89    9.05
  -9  -3  11   20.19   10.68
  -9   3  10  213.19   35.41
  -9  -3  10  207.76   30.43
  -9  -3  10  240.33   30.77
  -9   3   9  339.90   40.45
  -9  -3   9  432.56   47.88
  -9  -3   9  421.11   46.11
  -9   3   8    1.47    4.11
  -9  -3   8    5.54    4.57
  -9  -3   8    1.87    5.71
  -9   3   7    5.94    4.31
  -9   3   7   11.85   10.15
  -9  -3   7    6.54   12.82
  -9  -3   7   14.57   11.24
  -9   3   6  355.04   29.89
  -9   3   6  332.44   34.19
  -9  -3   6  384.90   38.50
  -9  -3   6  353.97   36.16
  -9   3   5  949.04   51.16
  -9   3   5  756.69   51.12
  -9  -3   5 1006.88   59.43
  -9  -3   5  821.88   49.45
  -9   3   4   47.82   10.90
  -9   3   4   39.05   10.86
  -9  -3   4   70.86   15.82
  -9  -3   4   64.22   10.73
  -9   3   3 1100.99   58.24
  -9   3   3  976.68   58.40
  -9  -3   3 1300.36   72.36
  -9  -3   3 1043.02   58.51
  -9   3   2  563.78   40.13
  -9   3   2  484.39   40.23
  -9  -3   2  671.54   50.84
  -9  -3   2  525.57   38.81
  -9   3   1  885.37   64.85
  -9   3   1  809.37   62.27
  -9  -3   1 1172.36   87.58
  -9  -3   1  775.04   56.75
  -9   3   0  252.64   64.18
  -9   3   0  219.71   23.06
  -9  -3   0  358.49   35.35
  -9  -3   0  248.42   22.23
  -9   3  -1  965.69   66.37
  -9   3  -1  829.25   59.40
  -9  -3  -1 1344.84   39.93
  -9  -3  -1  877.07   25.30
  -9   3  -2  836.90   74.91
  -9   3  -2  774.68   57.43
  -9  -3  -2 1290.75   87.71
  -9  -3  -2  748.05   50.90
  -9   3  -3  609.61   46.01
  -9  -3  -3  826.59   60.71
  -9  -3  -3  562.02   40.60
  -9   3  -4    5.55    8.09
   9   3   4    6.50    9.57
  -9  -3  -4   24.16   15.21
   9  -3   4   14.52   15.27
  -9   3  -5 1452.50   82.13
   9   3   5 1463.18   78.74
  -9  -3  -5 2175.79  119.22
   9  -3   5 1362.17   79.19
  -9   3  -6   21.19    9.06
   9   3   6   14.48   15.69
  -9  -3  -6   31.01   18.85
   9  -3   6   34.83   10.00
  -9   3  -7    5.15    6.09
   9   3   7    9.21    5.85
   9  -3   7    6.47    4.45
  -9   3  -8  239.03   25.67
   9   3   8  285.34   24.80
  -9  -3  -8  398.06   42.04
   9  -3   8  244.72   25.99
  -9   3  -9 1046.88   81.24
   9   3   9 1104.45   81.57
  -9  -3  -9 1571.85  116.55
   9  -3   9 1079.62   86.24
  -9   3 -10  141.10   27.20
   9   3  10  133.46   21.02
  -9  -3 -10  197.03   31.85
   9  -3  10  124.40   25.42
  -9   3 -11   20.57   16.08
   9   3  11    4.55    6.32
  -9  -3 -11   17.53    5.81
   9  -3  11    9.33   12.65
  -9   3 -12   61.03   21.44
  -9  -3 -12  128.86   27.18
   9  -3  12   79.80   29.10
  -9   3 -13  490.44   54.07
  -9  -3 -13  679.33   66.98
   9  -3  13  598.08   77.66
  -9   3 -14   26.97   10.02
  -9  -3 -14   14.79   10.02
   9  -3  14   22.87   14.07
  -9   3 -15  127.47   26.99
  -9  -3 -15  177.06   30.41
   9  -3  15  136.70   26.14
  -9   4  15   14.28   13.00
  -9  -4  15   13.27    7.55
  -9   4  14  340.41   42.69
  -9  -4  14  434.18   51.21
  -9  -4  14  281.88   26.95
  -9   4  13   10.01    6.38
  -9  -4  13   22.71   18.01
  -9  -4  13   14.43   18.19
  -9   4  12  635.12   57.11
  -9  -4  12  725.35   57.00
  -9  -4  12  704.91   58.44
  -9   4  11   11.24   10.09
  -9  -4  11    8.21   11.11
  -9  -4  11    4.34    7.74
  -9   4  10  145.29   31.92
  -9  -4  10  219.30   30.20
  -9  -4  10  216.07   26.91
  -9   4   9  129.63   21.51
  -9  -4   9  145.67   24.54
  -9  -4   9  138.12   29.07
  -9   4   8 2179.23  157.08
  -9  -4   8 2912.54  541.98
  -9  -4   8 2711.49  504.49
  -9   4   7  242.72   31.10
  -9  -4   7  253.23   32.57
  -9  -4   7  242.45   26.86
  -9   4   6  175.72   14.88
  -9   4   6  203.00   23.77
  -9  -4   6  250.18   28.08
  -9  -4   6  204.50   21.26
  -9   4   5  365.06   36.55
  -9   4   5  377.12   42.72
  -9  -4   5  487.00   52.50
  -9  -4   5  371.45   40.57
  -9   4   4 1782.74   61.25
  -9   4   4 1562.85   63.62
  -9  -4   4 2212.06   82.51
  -9  -4   4 1793.54   66.04
  -9   4   3    1.78    8.58
  -9  -4   3    8.37    9.46
  -9  -4   3   11.92    7.44
  -9   4   2   80.47   11.64
  -9   4   2  101.53   21.93
  -9  -4   2  159.57   24.20
  -9  -4   2  116.43   11.67
  -9   4   1  163.35   18.48
  -9   4   1  154.06   28.06
  -9  -4   1  209.31   26.04
  -9  -4   1  152.11   18.19
  -9   4   0 2415.49  128.04
  -9   4   0 2611.73  139.28
  -9  -4   0 3613.41  188.42
  -9  -4   0 2625.68  134.46
  -9   4  -1    9.24    5.79
  -9   4  -1   12.69    9.73
  -9  -4  -1   19.31   12.81
  -9  -4  -1   25.51    6.78
  -9   4  -2  255.05   26.47
  -9   4  -2  187.02   22.66
  -9  -4  -2  306.40   32.34
  -9  -4  -2  199.45   18.96
  -9  -4  -3   16.94    8.32
  -9  -4  -3    6.35    4.42
   9  -4   3    9.05    6.82
  -9   4  -4 1609.27   65.71
   9   4   4 1677.49   56.52
  -9  -4  -4 2431.40   90.76
   9  -4   4 1587.90   64.32
  -9   4  -5   49.01   13.36
   9   4   5   57.82   14.60
  -9  -4  -5   84.19   15.52
   9  -4   5   72.66   15.89
  -9   4  -6   50.22   11.73
   9   4   6   83.02   10.26
  -9  -4  -6   98.91   19.95
   9  -4   6   75.21   16.84
  -9   4  -7   18.28    9.78
   9   4   7    1.29    2.96
  -9  -4  -7   24.35   11.40
   9  -4   7    8.86   11.59
  -9   4  -8  937.71   61.45
  -9  -4  -8 1473.91   86.12
   9  -4   8 1026.42   67.27
  -9   4  -9   24.95   15.73
  -9  -4  -9   13.24    7.98
   9  -4   9    5.55    9.84
  -9   4 -10  473.35   54.75
  -9  -4 -10  689.97   75.96
   9  -4  10  519.51   59.62
  -9   4 -11    7.30   10.53
  -9  -4 -11   17.68    8.79
   9  -4  11   21.71   15.30
  -9   4 -12  393.76   51.11
  -9  -4 -12  722.67   84.89
   9  -4  12  477.35   61.15
  -9   4 -13   28.73   16.18
  -9  -4 -13   55.57   16.52
   9  -4  13   55.92   19.00
  -9   4 -14  339.34   56.74
  -9  -4 -14  645.25   72.14
   9  -4  14  464.63   56.20
  -9   5  14   32.22   23.54
  -9  -5  14   27.27   17.83
  -9  -5  14   25.26   16.69
  -9   5  13  484.49   57.82
  -9  -5  13  607.73   69.59
  -9  -5  13  560.12   65.53
  -9   5  12   14.97    7.63
  -9  -5  12   15.13   13.75
  -9  -5  12   17.23    6.86
  -9   5  11   38.61   19.59
  -9  -5  11   71.28   22.46
  -9  -5  11   68.29   17.56
  -9   5  10  138.98   24.83
  -9  -5  10  126.99   25.06
  -9  -5  10  131.44   21.67
  -9   5   9 1171.43   90.90
  -9  -5   9 1484.24  111.38
  -9  -5   9 1429.26  106.91
  -9   5   8   25.56    9.90
  -9  -5   8   14.64   10.36
  -9  -5   8   12.17    6.98
  -9   5   7  370.38   44.73
  -9  -5   7  419.87   56.79
  -9  -5   7  395.18   46.34
  -9   5   6  247.75   38.93
  -9  -5   6  349.75   44.06
  -9  -5   6  267.76   34.66
  -9   5   5 1297.68   97.70
  -9  -5   5 1688.19  124.26
  -9  -5   5 1338.67   97.31
  -9   5   4    4.84    3.32
  -9   5   4   12.49    9.06
  -9  -5   4   13.71   11.92
  -9  -5   4    2.46    4.11
  -9   5   3  667.07   50.11
  -9   5   3  562.43   47.02
  -9  -5   3  815.89   65.20
  -9  -5   3  667.30   51.34
  -9   5   2   82.16   13.19
  -9   5   2  116.03   18.52
  -9  -5   2  107.50   21.12
  -9  -5   2   83.62   12.40
  -9   5   1  662.82   51.98
  -9   5   1  687.69   55.24
  -9  -5   1  897.34   71.15
  -9  -5   1  678.76   50.13
  -9   5   0    9.01    7.25
  -9   5   0    6.40    9.54
  -9  -5   0   26.87   16.25
  -9  -5   0    4.13    3.43
  -9   5  -1 1354.37  100.20
  -9   5  -1 1290.79   98.00
  -9  -5  -1 1811.29  130.97
  -9  -5  -1 1296.97   90.78
  -9   5  -2  270.24   27.18
  -9  -5  -2  402.68   40.97
  -9  -5  -2  247.32   20.27
   9  -5   2  266.42   28.53
  -9   5  -3  193.31   20.29
  -9  -5  -3  364.73   37.28
   9  -5   3  229.91   26.71
  -9   5  -4   27.95   12.82
  -9  -5  -4   20.44   11.40
   9  -5   4    9.51   11.25
  -9   5  -5 1031.04   81.49
  -9  -5  -5 1761.37  129.28
   9  -5   5 1096.49   86.84
  -9   5  -6  250.49   33.71
  -9  -5  -6  417.86   51.17
   9  -5   6  323.04   40.87
  -9   5  -7   66.12   17.49
  -9  -5  -7  100.10   23.08
   9  -5   7   34.77   17.97
  -9   5  -8    9.31    6.42
  -9  -5  -8   11.07    8.07
   9  -5   8    3.61   12.21
  -9   5  -9 1297.45   99.96
  -9  -5  -9 2182.96  159.89
   9  -5   9 1531.68  116.62
  -9   5 -10   60.13   18.95
  -9  -5 -10   68.75   18.44
   9  -5  10   73.23   18.93
  -9   5 -11    8.57   13.43
  -9  -5 -11   15.20   16.72
   9  -5  11   39.97   13.42
  -9   5 -12  139.44   25.25
  -9  -5 -12  154.83   30.95
   9  -5  12  128.39   25.25
  -9   5 -13  580.37   60.25
  -9  -5 -13  788.21   71.02
   9  -5  13  658.20   65.19
  -9   6  12  240.93   31.79
  -9  -6  12  278.89   34.99
  -9  -6  12  178.11   30.99
  -9   6  11  369.61   37.70
  -9  -6  11  368.27   46.88
  -9  -6  11  390.04   40.87
  -9   6  10   63.60   18.58
  -9  -6  10   89.51   23.81
  -9  -6  10   78.37   18.85
  -9   6   9   59.29   18.62
  -9  -6   9   38.01   24.57
  -9  -6   9   18.16   12.16
  -9   6   8  655.69   60.50
  -9  -6   8  789.15   76.37
  -9  -6   8  725.63   61.42
  -9   6   7  226.45   21.21
  -9  -6   7  289.70   25.52
  -9  -6   7  272.03   32.91
  -9   6   6   86.36   65.39
  -9  -6   6   12.32   14.09
  -9  -6   6   51.56   16.40
  -9   6   5  305.42   34.89
  -9  -6   5  397.76   48.05
  -9  -6   5  310.52   30.64
  -9   6   4  894.30   65.52
  -9  -6   4 1245.81   89.17
  -9  -6   4 1037.89   67.83
  -9   6   3  367.27   42.32
  -9   6   3  366.79   44.76
  -9  -6   3  483.96   58.48
  -9  -6   3  378.07   42.60
  -9   6   2    5.37    5.23
  -9   6   2    4.70    5.64
  -9  -6   2   10.45   18.51
  -9   6   1  197.58   26.53
  -9   6   1  207.88   34.07
  -9  -6   1  310.16   40.05
  -9   6   0  544.36   35.99
  -9   6   0  612.61   49.29
  -9  -6   0  775.90   53.21
  -9   6  -1   67.82   14.79
  -9  -6  -1   86.44   16.26
   9  -6   1   61.50   16.29
  -9   6  -2   91.10   22.30
  -9  -6  -2   87.00   15.23
   9  -6   2   50.28   16.00
  -9   6  -3  322.49   39.56
  -9  -6  -3  596.77   70.19
   9  -6   3  333.75   46.76
  -9   6  -4  533.53   43.42
  -9  -6  -4  854.89   62.47
   9  -6   4  561.26   48.62
  -9   6  -5    4.67    5.20
  -9  -6  -5   19.28   17.57
   9  -6   5   16.57   14.86
  -9   6  -6  314.34   42.91
  -9  -6  -6  429.18   52.52
   9  -6   6  300.17   38.47
  -9   6  -7  547.39   54.39
  -9  -6  -7 1033.08   86.96
   9  -6   7  608.91   63.25
  -9   6  -8  571.03   50.32
  -9  -6  -8 1066.79   78.41
   9  -6   8  605.47   50.26
  -9   6  -9   26.47   19.71
   9  -6   9   10.55    5.31
  -9   6 -10  189.35   29.10
  -9  -6 -10  281.01   41.88
   9  -6  10  229.35   38.17
  -9   6 -11  203.47   29.88
  -9  -6 -11  297.95   35.43
   9  -6  11  202.96   31.48
  -9   6 -12  160.34   28.27
  -9  -6 -12  252.13   35.87
   9  -6  12  187.29   32.56
  -9   7  10  353.44   42.36
  -9  -7  10  392.11   44.11
  -9  -7  10  404.01   42.28
  -9   7   9  123.18   21.64
  -9  -7   9  205.76   28.02
  -9  -7   9  178.27   24.39
  -9   7   8  114.96   24.20
  -9  -7   8  109.52   24.41
  -9  -7   8   60.67   16.36
  -9   7   7   77.82   21.30
  -9  -7   7  108.16   24.53
  -9   7   6  771.99   58.67
  -9  -7   6  993.11   74.14
  -9   7   5  196.41   31.27
  -9  -7   5  257.21   41.01
  -9   7   4   27.38   16.52
  -9  -7   4    3.45    5.92
  -9   7   3  115.07   31.53
  -9  -7   3  140.51   21.11
  -9   7   2  967.98   78.60
  -9   7   2  953.85   82.53
  -9  -7   2 1199.79   98.94
  -9   7   1  147.43   28.62
  -9  -7   1  250.30   45.23
   9  -7  -1  136.93   27.91
  -9   7   0   18.45    9.75
  -9  -7   0    6.74    6.45
   9  -7   0    7.38    9.10
  -9   7  -1  254.18   32.13
  -9  -7  -1  287.07   49.63
   9  -7   1  231.95   42.74
  -9   7  -2  858.96   71.37
  -9  -7  -2 1125.43   94.70
   9  -7   2  810.30   69.89
  -9   7  -3  127.33   23.03
  -9  -7  -3  233.89   33.85
   9  -7   3  155.63   30.50
  -9   7  -4   96.09   23.49
  -9  -7  -4  246.82   35.49
   9  -7   4  155.33   27.35
  -9   7  -5  212.88   32.81
  -9  -7  -5  299.82   43.60
   9  -7   5  204.67   31.02
  -9   7  -6  406.27   45.50
  -9  -7  -6  664.03   68.62
   9  -7   6  533.74   54.23
  -9   7  -7   53.49   35.39
  -9  -7  -7  133.91   27.10
   9  -7   7   57.81   27.20
  -9   7  -8  330.57   38.19
  -9  -7  -8  608.32   58.48
   9  -7   8  408.83   41.80
  -9   7  -9  177.15   27.16
  -9  -7  -9  303.05   36.06
   9  -7   9  179.61   33.95
  -9   7 -10  145.45   32.47
  -9  -7 -10  317.40   38.12
   9  -7  10  192.09   34.86
  -9   8   7  375.73   40.43
  -9  -8   7  405.19   46.99
  -9   8   6   20.04    8.07
  -9  -8   6   17.11   17.79
  -9   8   5  112.95   20.00
  -9  -8   5  121.40   25.00
  -9   8   4   29.58   15.44
  -9  -8   4   24.37   15.77
  -9  -8   3  247.04   35.93
  -9  -8   2   24.19   19.46
   9  -8  -2    5.51   12.74
  -9  -8   1  501.28   54.54
   9  -8  -1  383.19   42.36
  -9   8   0    3.24    8.67
  -9  -8   0   16.94    9.50
   9  -8   0   13.42   11.18
  -9   8  -1  309.73   32.76
  -9  -8  -1  420.65   51.59
   9  -8   1  285.57   37.43
  -9   8  -2   19.19   11.00
  -9  -8  -2   44.32   21.89
   9  -8   2   22.10   14.30
  -9   8  -3  347.31   38.18
  -9  -8  -3  581.87   55.65
   9  -8   3  432.79   51.99
  -9   8  -4    6.40    6.61
  -9  -8  -4   19.34    9.73
   9  -8   4   16.86   16.08
  -9   8  -5   64.42   18.15
  -9  -8  -5   94.50   21.29
   9  -8   5   15.69   19.96
  -9   8  -6   16.44   13.35
  -9  -8  -6   13.47    7.47
   9  -8   6   10.07   10.85
  -9   8  -7  395.40   47.48
  -9  -8  -7  688.87   67.17
   9  -8   7  457.71   47.26
 -10   0  16    4.49    7.75
 -10   0  15   12.52   13.09
 -10   0  14 1040.56   45.59
 -10   0  13   16.01    9.13
 -10   0  12   93.78   25.11
 -10   0  11   13.90    9.42
 -10   0  10 1992.80  104.64
 -10   0  10 1253.86   76.26
 -10   0   9    2.99    7.30
 -10   0   9    6.96   10.53
 -10   0   8 1427.98  102.02
 -10   0   8  962.45   75.09
 -10   0   7    7.96    8.41
 -10   0   6 5097.25  256.77
 -10   0   6 3186.12  167.53
 -10   0   5    6.75   10.67
 -10   0   5    3.95    6.38
 -10   0   4 2419.59  121.73
 -10   0   4 1612.93   87.18
 -10   0   3    3.70    5.03
 -10   0   3   17.59   14.02
 -10   0   2 2747.38  129.32
 -10   0   2 1665.20   83.18
 -10   0   1    6.84    5.51
 -10   0   1   17.81   15.46
 -10   0   0 6148.75  278.51
 -10   0   0 3869.71  180.13
 -10   0  -1    6.76    9.90
 -10   0  -1    4.51    4.26
 -10   0  -2 3015.34  143.25
 -10   0  -2 1985.77   97.02
 -10   0  -3    5.65    5.92
 -10   0  -3   18.16    5.48
 -10   0  -4 5590.56  273.77
 -10   0  -4 4120.92  204.42
 -10   0  -5    6.24    8.20
  10   0   5    7.07    6.17
 -10   0  -6   18.71    7.98
  10   0   6   22.04   16.31
 -10   0  -7    4.33    6.46
 -10   0  -8 3361.01  235.15
  10   0   8 2465.76  173.16
  10   0   9   10.28    8.99
 -10   0 -10   17.40   19.87
  10   0  10   13.05    9.20
 -10   0 -11    9.63    9.55
  10   0  11    2.55    6.03
 -10   0 -12 1984.87   62.81
  10   0  12 1628.95  128.90
 -10   0 -13   12.21    6.76
  10   0  13   11.91   11.21
 -10   0 -14  139.12   24.89
  10   0  14  130.10   23.04
 -10   0 -15   10.07    8.04
  10   0  15   10.09    6.06
 -10   1  15  283.98   36.49
 -10  -1  15  292.33   29.15
 -10   1  14    8.11   14.23
 -10  -1  14   14.86   10.51
 -10   1  13  708.47   71.18
 -10  -1  13  604.71   50.04
 -10   1  12  180.45   39.99
 -10  -1  12  237.93   42.53
 -10   1  11  192.85   28.30
 -10  -1  11  290.11   29.25
 -10  -1  11  212.81   28.60
 -10   1  10   80.12   20.81
 -10  -1  10  149.05   21.49
 -10  -1  10  100.92   20.54
 -10   1   9 1428.91  100.29
 -10   1   9  880.39   70.24
 -10  -1   9 1175.72   86.82
 -10  -1   9  980.44   77.03
 -10   1   8  629.80   87.88
 -10   1   8  425.06   63.35
 -10  -1   8  665.87   54.70
 -10  -1   8  456.51   41.84
 -10   1   7   84.21   11.98
 -10   1   7   71.57   19.30
 -10  -1   7   68.08   11.73
 -10  -1   7   50.76   13.83
 -10   1   6  346.54   33.13
 -10   1   6  246.30   30.68
 -10  -1   6  319.16   32.25
 -10  -1   6  235.96   27.42
 -10   1   5 3650.22  185.38
 -10   1   5 2362.44  127.46
 -10  -1   5 3440.21  177.14
 -10  -1   5 2509.20  133.85
 -10   1   4  840.49   57.30
 -10   1   4  587.12   44.98
 -10  -1   4  866.36   60.41
 -10  -1   4  597.42   45.43
 -10   1   3   32.01   21.59
 -10   1   3   25.83   17.92
 -10  -1   3   42.12   12.78
 -10  -1   3   14.33   11.94
 -10   1   2  148.29   15.21
 -10   1   2   93.72   14.45
 -10  -1   2  138.34   15.21
 -10  -1   2  115.79   14.00
 -10   1   1 1249.54   89.65
 -10   1   1  904.44   38.76
 -10  -1   1 1345.28   96.80
 -10  -1   1  873.51   64.69
 -10   1   0  443.39   37.97
 -10   1   0  306.15   28.94
 -10  -1   0  479.77   41.93
 -10  -1   0  352.52   30.90
 -10   1  -1  669.99   51.96
 -10   1  -1  454.59   38.64
 -10  -1  -1  828.80   63.46
 -10  -1  -1  517.79   41.86
 -10   1  -2  943.45   66.00
 -10   1  -2  676.06   49.99
 -10  -1  -2 1069.72   73.49
 -10  -1  -2  647.16   46.23
 -10   1  -3 2410.23  124.16
 -10   1  -3 1809.85   95.93
 -10  -1  -3 2800.48  142.69
 -10  -1  -3 1804.76   93.80
 -10   1  -4  118.55   16.25
 -10  -1  -4  130.77   16.86
 -10  -1  -4  114.72   14.97
 -10   1  -5 1237.15   73.11
  10   1   5 1013.83   59.56
 -10  -1  -5 1223.59   72.14
  10  -1   5  894.27   55.35
 -10   1  -6  482.20   51.42
  10   1   6  432.13   45.49
 -10  -1  -6  553.09   59.75
  10  -1   6  483.91   51.85
 -10   1  -7  439.66   49.11
  10   1   7  424.17   44.70
 -10  -1  -7  479.02   51.33
  10  -1   7  411.80   45.47
 -10   1  -8   24.38   11.82
  10   1   8    6.56   12.61
 -10  -1  -8   21.69   17.52
  10  -1   8    9.21    8.55
 -10   1  -9  554.96  107.29
  10   1   9  508.89   97.27
 -10  -1  -9  673.52   56.62
  10  -1   9  575.76   48.90
 -10   1 -10  443.14   53.44
  10   1  10  386.61   46.88
 -10  -1 -10  425.15   52.39
  10  -1  10  407.78   50.98
 -10   1 -11  859.43   71.43
  10   1  11  863.62   68.96
 -10  -1 -11  987.59   79.50
  10  -1  11  796.34   67.31
 -10   1 -12   68.60   23.71
  10   1  12   73.88   17.27
 -10  -1 -12   78.14   17.94
 -10   1 -13  431.57   55.86
  10   1  13  488.33   59.15
 -10  -1 -13  480.76   59.67
  10  -1  13  415.19   53.05
 -10   1 -14   34.61   16.54
  10   1  14   41.20   13.84
 -10  -1 -14   58.65   18.67
  10  -1  14   33.78   18.13
 -10   1 -15   85.14   21.51
  10   1  15   87.86   28.98
 -10  -1 -15   99.45   22.19
  10  -1  15  101.54   32.71
 -10   2  15  221.42   29.29
 -10  -2  15  254.32   32.04
 -10   2  14  274.49   42.01
 -10  -2  14  398.30   44.96
 -10   2  13  143.92   25.69
 -10  -2  13  156.42   24.33
 -10   2  12   85.50   21.31
 -10  -2  12  125.35   24.68
 -10  -2  12   73.33   24.12
 -10   2  11  320.80   50.62
 -10  -2  11  315.83   41.48
 -10  -2  11  284.54   37.70
 -10   2  10  328.14   41.84
 -10  -2  10  509.44   28.30
 -10  -2  10  381.37   49.42
 -10   2   9  220.38   29.29
 -10  -2   9  273.20   31.83
 -10  -2   9  243.00   31.04
 -10   2   8  330.01   25.15
 -10   2   8  236.60   26.88
 -10  -2   8  374.96   33.47
 -10  -2   8  304.96   29.14
 -10   2   7  347.19   38.06
 -10   2   7  277.33   34.61
 -10  -2   7  377.28   32.99
 -10  -2   7  340.94   31.99
 -10   2   6  535.24   53.07
 -10   2   6  459.67   50.84
 -10  -2   6  717.25   50.94
 -10  -2   6  505.27   38.41
 -10   2   5   90.28   14.23
 -10   2   5   66.87   27.35
 -10  -2   5  107.79   17.15
 -10  -2   5   65.71   11.17
 -10   2   4  995.34   55.93
 -10   2   4  840.56   52.44
 -10  -2   4 1155.54   67.52
 -10  -2   4  802.62   49.94
 -10   2   3  245.80   20.96
 -10   2   3  221.15   22.39
 -10  -2   3  284.67   25.67
 -10  -2   3  200.10   19.82
 -10   2   2  129.15   17.75
 -10   2   2   87.30   15.10
 -10  -2   2  171.02   17.08
 -10  -2   2   85.92   11.08
 -10   2   1    6.50    5.05
 -10   2   1    8.42    5.78
 -10  -2   1   11.20   16.30
 -10  -2   1    8.23    9.25
 -10   2   0 2276.60  116.50
 -10   2   0 1972.94  104.32
 -10  -2   0 3080.74  155.41
 -10  -2   0 1808.88   93.79
 -10   2  -1  652.58   47.69
 -10   2  -1  603.37   48.26
 -10  -2  -1  800.17   58.42
 -10  -2  -1  543.76   40.03
 -10   2  -2 1012.62   70.08
 -10   2  -2  838.73   66.54
 -10  -2  -2 1336.99   42.05
 -10  -2  -2  820.73   57.86
 -10   2  -3  531.36   48.85
 -10   2  -3  488.93   44.80
 -10  -2  -3  675.51   59.42
 -10  -2  -3  446.96   39.99
 -10   2  -4  551.16   51.01
 -10  -2  -4  671.82   60.84
  10  -2   4  492.35   47.05
 -10   2  -5 1300.51   55.64
  10   2   5 1141.56   46.03
  10  -2   5 1124.70   52.52
 -10   2  -6   27.54   14.02
  10   2   6   16.91   10.64
 -10  -2  -6   29.83   18.54
  10  -2   6   23.58   11.31
 -10   2  -7   59.23   16.76
  10   2   7   24.24   16.34
 -10  -2  -7   30.77   14.91
  10  -2   7   50.99   14.46
 -10   2  -8  267.20   32.97
  10   2   8  302.61   35.28
 -10  -2  -8  475.13   53.20
  10  -2   8  298.98   36.01
 -10   2  -9  369.96   48.18
  10   2   9  309.42   36.49
 -10  -2  -9  474.67   55.98
  10  -2   9  296.28   38.33
 -10   2 -10   29.68   19.25
  10   2  10    5.13    6.88
 -10  -2 -10   31.61   12.25
  10  -2  10    6.88    9.61
 -10   2 -11  521.91   59.77
  10   2  11  522.04   58.92
 -10  -2 -11  684.63   76.00
  10  -2  11  546.26   63.49
 -10   2 -12  516.34   64.42
  10   2  12  572.22   43.68
 -10  -2 -12  659.43   52.42
  10  -2  12  560.51   37.49
 -10   2 -13   97.52   21.97
  10   2  13   99.18   22.13
 -10  -2 -13  100.57   16.68
  10  -2  13   91.30   22.27
 -10   2 -14   18.79   11.32
 -10  -2 -14   14.04   14.36
  10  -2  14    4.59   11.11
 -10   2 -15  120.96   26.78
 -10  -2 -15  124.75   26.02
  10  -2  15  145.14   46.99
 -10   3  15   72.15   27.54
 -10  -3  15   66.56   27.85
 -10   3  14    7.69   10.59
 -10  -3  14   25.03   14.09
 -10   3  13   25.02   10.99
 -10  -3  13   26.91   10.97
 -10  -3  13   20.95   10.01
 -10   3  12  591.00   49.84
 -10  -3  12  747.95   55.02
 -10  -3  12  603.03   49.65
 -10   3  11   17.10    8.86
 -10  -3  11   13.35    9.78
 -10  -3  11    9.19    8.45
 -10   3  10  329.37   37.13
 -10  -3  10  347.61   37.50
 -10  -3  10  261.52   31.08
 -10   3   9  734.30   51.23
 -10  -3   9  871.81   56.63
 -10  -3   9  692.83   48.45
 -10   3   8  935.92   76.06
 -10  -3   8 1352.87  101.07
 -10  -3   8 1046.65   80.99
 -10   3   7   29.60   14.28
 -10  -3   7   22.35   11.56
 -10  -3   7    9.61   11.50
 -10   3   6 1137.55   79.80
 -10   3   6  963.29   75.91
 -10  -3   6 1349.19   99.87
 -10  -3   6 1066.86   79.63
 -10   3   5  133.92   15.29
 -10   3   5  153.04   23.42
 -10  -3   5  195.92   26.21
 -10  -3   5  130.57   19.64
 -10   3   4  806.35   35.01
 -10   3   4  743.09   39.11
 -10  -3   4  976.67   45.47
 -10   3   3   14.99   12.98
 -10   3   3   27.33   16.54
 -10  -3   3   16.72   11.04
 -10  -3   3    5.86    7.03
 -10   3   2 1476.43   80.18
 -10   3   2 1206.13   70.45
 -10  -3   2 1933.78  106.07
 -10  -3   2 1392.61   76.71
 -10   3   1  818.96   47.92
 -10   3   1  735.62   48.61
 -10  -3   1 1113.42   67.89
 -10  -3   1  814.62   48.64
 -10   3   0  793.65   49.13
 -10   3   0  744.75   49.06
 -10  -3   0 1185.80   71.44
 -10  -3   0  823.09   48.78
 -10   3  -1    6.34   10.57
 -10  -3  -1    5.28    9.05
 -10  -3  -1    7.30    3.84
 -10   3  -2 1320.25   75.67
 -10   3  -2 1253.44   73.11
 -10  -3  -2 1884.82  108.03
 -10  -3  -2 1209.06   66.52
 -10   3  -3  185.52   25.61
 -10   3  -3  175.32   25.21
 -10  -3  -3  228.02   30.69
 -10  -3  -3  154.93   19.83
 -10   3  -4  395.53   43.45
  10   3   4  405.37   41.83
 -10  -3  -4  666.19   69.43
  10  -3   4  341.12   43.30
 -10   3  -5   76.33   15.16
  10   3   5   91.53   14.68
 -10  -3  -5  141.76   23.19
  10  -3   5   75.06   14.93
 -10   3  -6  268.22   28.25
  10   3   6  256.27   23.27
 -10  -3  -6  361.51   35.74
  10  -3   6  234.27   26.07
 -10   3  -7  236.07   30.76
  10   3   7  237.22   27.91
 -10  -3  -7  308.73   38.48
  10  -3   7  227.91   32.36
 -10   3  -8   13.31    7.59
  10   3   8    3.72    6.46
 -10  -3  -8   21.23   13.71
  10  -3   8    7.51    4.31
 -10   3  -9  132.42   27.31
  10   3   9  161.55   25.71
 -10  -3  -9  165.47   30.17
  10  -3   9  133.72   26.56
 -10   3 -10 1114.42   88.23
  10   3  10 1134.10   83.57
 -10  -3 -10 1460.27  110.89
  10  -3  10 1122.14   88.06
 -10   3 -11   80.55   17.65
 -10  -3 -11   97.50   21.31
  10  -3  11   65.32   22.44
 -10   3 -12    5.49    6.61
 -10  -3 -12   18.15    8.22
  10  -3  12   20.83   14.84
 -10   3 -13   60.64   19.93
 -10  -3 -13   83.41   25.75
  10  -3  13   79.82   20.02
 -10   3 -14  316.90   45.67
 -10  -3 -14  309.98   30.07
  10  -3  14  304.38   28.29
 -10  -4  14    6.25    9.54
 -10  -4  14   16.48   13.34
 -10   4  13  252.63   30.44
 -10  -4  13  286.84   37.07
 -10  -4  13  206.82   27.89
 -10   4  12   15.36    8.12
 -10  -4  12   20.75   15.52
 -10   4  11  573.73   63.09
 -10  -4  11  813.68   60.83
 -10  -4  11  724.78   56.77
 -10   4  10   53.92   26.03
 -10  -4  10   62.15   16.71
 -10  -4  10   66.00   18.08
 -10   4   9  108.79   23.98
 -10  -4   9  147.03   28.83
 -10  -4   9  123.89   25.45
 -10   4   8   22.25   17.77
 -10  -4   8   31.01   25.47
 -10  -4   8   32.04    9.42
 -10   4   7 1130.06   76.08
 -10  -4   7 1523.11   87.78
 -10  -4   7 1169.46   68.65
 -10   4   6   15.48    9.59
 -10  -4   6   22.90   17.96
 -10  -4   6    8.99    7.54
 -10   4   5   41.15    9.56
 -10   4   5   32.58   12.05
 -10  -4   5   40.28   21.61
 -10  -4   5   54.24   13.98
 -10   4   4  253.66   21.71
 -10   4   4  219.38   25.10
 -10  -4   4  333.71   32.86
 -10  -4   4  236.31   23.22
 -10   4   3 1126.35   80.73
 -10   4   3 1104.49   85.86
 -10  -4   3 1656.72  120.80
 -10  -4   3 1166.44   85.28
 -10   4   2    8.63    6.57
 -10   4   2   12.11    9.32
 -10  -4   2   24.25   16.76
 -10  -4   2   10.89    6.94
 -10   4   1   44.78    8.88
 -10   4   1   36.27   11.10
 -10  -4   1   66.63   17.08
 -10  -4   1   41.46    9.28
 -10   4   0   19.77   17.45
 -10   4   0   22.97   12.97
 -10  -4   0   25.18   18.36
 -10  -4   0   23.87    6.24
 -10   4  -1 1404.58   56.16
 -10   4  -1 1419.26   62.00
 -10  -4  -1 2025.01   79.63
 -10  -4  -1 1395.25   51.39
 -10   4  -2    5.37    6.58
 -10  -4  -2   12.62   11.23
 -10  -4  -2    8.05    5.88
 -10   4  -3  337.27   31.28
 -10  -4  -3  511.70   48.05
 -10  -4  -3  368.58   30.65
  10  -4   3  356.58   33.91
 -10   4  -4  204.05   24.27
  10   4   4  139.77   13.98
 -10  -4  -4  266.25   32.08
  10  -4   4  169.94   20.99
 -10   4  -5 1562.94  115.32
  10   4   5 1783.73  124.55
 -10  -4  -5 2679.18  193.89
  10  -4   5 1563.48  116.37
 -10   4  -6  105.22   23.89
 -10  -4  -6  141.65   25.15
  10  -4   6   42.24   14.76
 -10   4  -7  441.37   37.38
 -10  -4  -7  754.81   58.26
  10  -4   7  438.29   34.49
 -10   4  -8   49.13   19.08
 -10  -4  -8   58.72   27.68
  10  -4   8   36.42   22.39
 -10   4  -9  686.89   60.49
 -10  -4  -9 1213.76   95.92
  10  -4   9  799.08   66.12
 -10   4 -10   10.15    5.63
 -10  -4 -10   15.94   14.07
  10  -4  10   14.85   10.59
 -10   4 -11  587.20   66.71
 -10  -4 -11  867.15   82.07
  10  -4  11  695.72   70.91
 -10   4 -12   18.19   13.48
 -10  -4 -12    7.11    8.37
  10  -4  12   17.82   12.67
 -10   4 -13   70.41   30.91
 -10  -4 -13  110.69   22.79
  10  -4  13   73.04   18.65
 -10   5  13   31.29   24.53
 -10  -5  13   57.51   23.83
 -10  -5  13   32.83   23.15
 -10   5  12  625.15   71.87
 -10  -5  12  871.97   93.93
 -10  -5  12  705.31   79.06
 -10   5  11   33.95   16.98
 -10  -5  11   28.39   15.45
 -10  -5  11   54.96   15.87
 -10   5  10  179.19   30.20
 -10  -5  10  234.27   36.68
 -10  -5  10  222.82   35.02
 -10   5   9   25.00   19.03
 -10  -5   9    8.14   16.90
 -10  -5   9   10.34    5.70
 -10   5   8  987.66   84.25
 -10  -5   8 1217.76   99.38
 -10  -5   8 1164.29   93.15
 -10   5   7   12.84   11.55
 -10  -5   7   30.51   13.75
 -10  -5   7   15.66    9.11
 -10   5   6  480.61   42.89
 -10  -5   6  682.95   53.02
 -10  -5   6  559.58   41.39
 -10   5   5   76.60   21.22
 -10  -5   5  161.11   27.62
 -10  -5   5   76.35   15.18
 -10   5   4  827.44   47.93
 -10   5   4  769.96   54.86
 -10  -5   4 1032.04   67.93
 -10  -5   4  821.20   50.55
 -10   5   3    1.97    6.60
 -10   5   3   10.13    5.35
 -10  -5   3   32.44   20.00
 -10  -5   3    3.05    4.10
 -10   5   2 1010.16   76.74
 -10   5   2  948.26   75.60
 -10  -5   2 1307.63   99.24
 -10  -5   2 1012.63   74.08
 -10   5   1   47.36   13.67
 -10   5   1   36.05   19.08
 -10  -5   1   56.14   18.39
 -10  -5   1   28.12    8.65
 -10   5   0  222.58   27.16
 -10   5   0  203.07   29.22
 -10  -5   0  268.20   34.37
 -10  -5   0  180.78   20.62
 -10   5  -1   55.40   14.65
 -10   5  -1   92.75   24.32
 -10  -5  -1   73.68   18.29
 -10  -5  -1   48.65    9.84
 -10   5  -2  956.50   72.98
 -10  -5  -2 1555.93  115.32
  10  -5   2 1074.56   86.63
 -10   5  -3   12.35   11.54
 -10  -5  -3   68.91   24.47
  10  -5   3   15.69   10.46
 -10   5  -4  111.89   23.98
 -10  -5  -4  184.56   28.15
  10  -5   4  107.56   21.98
 -10   5  -5  144.21   17.65
 -10  -5  -5  245.28   30.83
  10  -5   5  164.70   25.60
 -10   5  -6 1312.38   90.33
 -10  -5  -6 2014.14  129.97
  10  -5   6 1359.15   97.90
 -10   5  -7  124.53   27.46
 -10  -5  -7  218.14   39.60
  10  -5   7  188.82   37.66
 -10   5  -8   18.87   13.09
 -10  -5  -8    8.32    8.98
  10  -5   8   36.92   20.68
 -10   5  -9   23.03   22.27
 -10  -5  -9   31.92   21.15
  10  -5   9   23.40   15.92
 -10   5 -10  701.88   70.56
 -10  -5 -10 1154.54  106.02
  10  -5  10  780.71   82.26
 -10   5 -11   13.71   11.64
 -10  -5 -11   20.66   17.31
  10  -5  11    5.08    9.75
 -10   5 -12   54.02   25.08
 -10  -5 -12   15.56   13.94
  10  -5  12   14.72   18.97
 -10   6  11  306.77   36.00
 -10  -6  11  358.04   44.68
 -10  -6  11  337.83   39.01
 -10   6  10  249.93   34.95
 -10  -6  10  285.06   36.36
 -10  -6  10  245.27   34.38
 -10   6   9   86.24   16.47
 -10  -6   9   71.77   20.80
 -10  -6   9   91.55   15.83
 -10   6   8   89.82   25.85
 -10  -6   8   54.11   27.50
 -10  -6   8  129.03   24.04
 -10   6   7  619.47   52.40
 -10  -6   7  840.48   66.03
 -10  -6   7  741.54   55.26
 -10   6   6  317.86   41.88
 -10  -6   6  420.83   58.50
 -10  -6   6  318.38   38.90
 -10   6   5   12.06    4.90
 -10  -6   5   10.13   14.17
 -10  -6   5    9.80   12.67
 -10   6   4  300.74   38.27
 -10  -6   4  423.97   50.65
 -10  -6   4  326.52   37.01
 -10   6   3  698.64   60.71
 -10  -6   3 1136.77   89.82
 -10   6   2  286.59   35.72
 -10   6   2  407.03   47.76
 -10  -6   2  509.86   62.08
 -10   6   1  115.75   22.31
 -10   6   1   98.32   22.74
 -10  -6   1  118.80   25.89
 -10   6   0  353.96   35.62
 -10   6   0  449.51   45.89
 -10  -6   0  583.09   56.04
 -10   6  -1  900.50   65.71
 -10  -6  -1 1453.51   98.37
  10  -6   1  938.60   68.95
 -10   6  -2  107.35   26.47
 -10  -6  -2  127.35   27.85
  10  -6   2   59.07   20.49
 -10   6  -3    9.19   10.96
 -10  -6  -3    8.13   11.12
  10  -6   3   10.69   15.10
 -10   6  -4  433.84   51.46
 -10  -6  -4  676.21   75.08
  10  -6   4  476.12   60.93
 -10   6  -5  405.47   40.41
 -10  -6  -5  589.12   37.20
  10  -6   5  420.21   44.61
 -10   6  -6    8.22    8.22
 -10  -6  -6   10.05    7.96
 -10   6  -7  461.07   65.12
 -10  -6  -7  759.51   89.29
  10  -6   7  446.60   57.55
 -10   6  -8  488.94   51.50
 -10  -6  -8  840.09   81.32
  10  -6   8  606.37   62.81
 -10   6  -9  323.32   37.57
 -10  -6  -9  581.42   59.02
  10  -6   9  346.25   46.13
 -10   6 -10    3.55   14.71
 -10  -6 -10   20.17   14.77
  10  -6  10    9.38   16.31
 -10   6 -11  170.03   27.45
 -10  -6 -11  371.34   42.19
  10  -6  11  210.45   35.18
 -10   7   9  316.43   39.61
 -10  -7   9  519.75   53.78
 -10   7   8   67.09   19.48
 -10  -7   8   49.99   22.22
 -10   7   7   56.48   24.21
 -10  -7   7   86.70   24.97
 -10   7   6  100.61   24.30
 -10  -7   6  115.31   22.67
 -10   7   5  400.75   45.23
 -10  -7   5  473.39   52.24
 -10   7   4   31.60   16.71
 -10  -7   4   43.13   37.00
 -10   7   3   27.67   17.60
 -10  -7   3   22.65   12.51
 -10   7   2  107.79   24.62
 -10  -7   2  187.42   37.97
 -10   7   1  884.27   63.28
 -10  -7   1 1325.92   97.29
 -10   7   0   56.13   13.15
 -10  -7   0   61.22   21.10
  10  -7   0   25.03   28.76
 -10   7  -1   23.77   17.47
 -10  -7  -1   62.74   18.76
  10  -7   1   36.89   18.74
 -10   7  -2   43.81   25.25
 -10  -7  -2   99.60   22.27
  10  -7   2   16.29   19.41
 -10   7  -3  310.48   38.34
 -10  -7  -3  497.73   55.26
  10  -7   3  366.36   41.05
 -10   7  -4   12.77   11.30
 -10  -7  -4   20.92   13.40
  10  -7   4   12.99   10.75
 -10   7  -5  208.84   39.78
 -10  -7  -5  412.07   58.48
  10  -7   5  277.90   42.28
 -10   7  -6   78.13   24.66
 -10  -7  -6  231.99   33.60
  10  -7   6  179.38   29.51
 -10   7  -7  362.64   46.75
 -10  -7  -7  572.95   67.11
  10  -7   7  385.84   54.64
 -10   7  -8   11.84   12.34
 -10  -7  -8   12.87   12.80
  10  -7   8   10.85   10.07
 -10   8   5   22.01   11.30
 -10  -8   5    4.30    6.22
 -10   8   4  115.24   25.98
 -10  -8   4  229.72   36.65
 -10  -8   3   29.39   18.92
 -10  -8   2  359.78   52.85
  10  -8  -2  311.51   44.53
 -10  -8   1    8.09   17.64
  10  -8  -1   15.59   22.27
 -10  -8   0  504.50   62.99
  10  -8   0  337.63   47.13
 -10   8  -1   26.35   19.58
 -10  -8  -1   25.46   15.34
  10  -8   1   29.41   16.54
 -10   8  -2   45.22   14.12
 -10  -8  -2   54.69   26.17
  10  -8   2   18.83   22.31
 -10   8  -3   11.21    7.15
  10  -8   3    3.98    9.05
 -10   8  -4  303.63   38.72
 -10  -8  -4  564.39   55.94
  10  -8   4  405.99   44.22
 -10   8  -5   23.31   13.99
 -10  -8  -5   18.64   12.32
  10  -8   5   77.21   52.18
 -11   0  15   10.65    4.98
 -11   0  14    5.49    8.28
 -11   0  13  743.46   74.28
 -11   0  12   16.75   13.98
 -11   0  11   76.01   21.82
 -11   0  10    3.49    6.75
 -11   0   9 2425.81  125.63
 -11   0   9 1466.95   86.15
 -11   0   8    2.06    6.00
 -11   0   8   10.46    8.99
 -11   0   7  386.52   34.07
 -11   0   7  209.05   24.78
 -11   0   6    8.99    6.61
 -11   0   6   12.50   11.13
 -11   0   5 2117.69   76.26
 -11   0   5 1252.91   54.49
 -11   0   4    5.27    9.45
 -11   0   4   10.03   13.50
 -11   0   3 1754.03   95.79
 -11   0   3 1200.22   69.73
 -11   0   2    4.31    7.01
 -11   0   2    5.65    4.67
 -11   0   1  361.10   35.11
 -11   0   1  235.75   27.57
 -11   0   0    6.88    8.17
 -11   0   0    6.72    6.74
 -11   0  -1 5238.80  267.25
 -11   0  -1 3593.78  283.53
 -11   0  -2    5.71    7.68
 -11   0  -2    6.99    5.50
 -11   0  -3    9.23    8.88
 -11   0  -3   15.23    9.04
 -11   0  -4   11.39    6.23
 -11   0  -5 3173.53  113.81
  11   0   5 2317.68   84.93
 -11   0  -6    7.01    7.85
  11   0   6    4.13    9.68
 -11   0  -7    7.57    6.58
  11   0   7    8.75   10.14
 -11   0  -8   11.46   12.25
 -11   0  -9 2283.80   60.77
  11   0   9 1919.91  122.55
 -11   0 -10   12.73   12.86
  11   0  10    9.04    9.38
 -11   0 -11   26.68   14.66
  11   0  11   30.31   16.78
 -11   0 -12   20.93   16.54
  11   0  12    8.71    9.68
 -11   0 -13  436.21   45.51
  11   0  13  513.41   48.64
  11   0  14    4.53   10.58
 -11   1  15  192.95   30.39
 -11  -1  15  175.37   31.02
 -11   1  14  120.28   27.16
 -11  -1  14   78.84   22.58
 -11   1  13    7.86    9.40
 -11  -1  13    5.29    8.15
 -11   1  12  584.59   51.38
 -11  -1  12  639.07   51.55
 -11   1  11  152.24   26.95
 -11  -1  11  260.82   33.18
 -11  -1  11  202.32   30.55
 -11   1  10   11.47   14.25
 -11  -1  10   26.44   13.94
 -11  -1  10   24.56   13.75
 -11  -1   9   80.34   20.35
 -11   1   8 1743.32  123.49
 -11   1   8 1224.06   94.65
 -11  -1   8 1772.81  127.94
 -11  -1   8 1134.49   87.53
 -11   1   7  602.66   60.50
 -11   1   7  400.74   49.65
 -11  -1   7  507.95   55.04
 -11  -1   7  431.76   47.73
 -11   1   6    9.75    7.86
 -11  -1   6    9.45   10.99
 -11  -1   6    4.74    5.78
 -11   1   5   18.35   12.95
 -11   1   5    8.16   11.19
 -11  -1   5   26.02   14.96
 -11  -1   5   20.93   18.34
 -11   1   4 2343.33   81.31
 -11   1   4 1631.20   66.06
 -11  -1   4 2389.68   89.70
 -11  -1   4 1653.61   66.63
 -11   1   3  147.48   14.34
 -11   1   3  113.30   16.84
 -11  -1   3  170.27   19.25
 -11  -1   3   99.15   13.42
 -11   1   2  358.41   34.81
 -11   1   2  274.68   30.16
 -11  -1   2  410.04   41.01
 -11  -1   2  265.15   29.47
 -11   1   1   91.48   14.03
 -11   1   1   75.10   16.02
 -11  -1   1  120.55   18.18
 -11  -1   1   62.59   13.73
 -11   1   0 3813.96  196.72
 -11   1   0 2633.36  140.33
 -11  -1   0 4211.96  217.61
 -11  -1   0 2570.43  135.82
 -11   1  -1    9.44    8.44
 -11   1  -1   15.27    9.19
 -11  -1  -1   11.71    8.56
 -11  -1  -1   15.32    9.29
 -11   1  -2  187.27   26.82
 -11   1  -2  174.13   23.12
 -11  -1  -2  210.90   26.85
 -11  -1  -2  141.55   18.77
 -11   1  -3  912.63   44.60
 -11   1  -3  590.81   35.10
 -11  -1  -3 1062.24   52.61
 -11  -1  -3  660.07   33.63
 -11   1  -4 1052.30   49.12
 -11  -1  -4 1170.60   52.63
 -11  -1  -4  784.63   40.10
 -11   1  -5   46.34   13.16
  11   1   5   26.27   16.13
 -11  -1  -5   20.96   16.32
  11  -1   5   42.63   11.28
 -11   1  -6  415.88   38.02
  11   1   6  385.13   34.76
 -11  -1  -6  501.58   44.84
  11  -1   6  384.29   34.48
 -11   1  -7  430.16   48.55
  11   1   7  425.81   46.13
 -11  -1  -7  584.46   63.64
  11  -1   7  367.03   41.67
 -11   1  -8  486.32   59.20
  11   1   8  409.65   49.39
 -11  -1  -8  434.94   54.55
  11  -1   8  341.39   43.08
  11   1   9   47.88   19.62
 -11  -1  -9   21.28   10.21
  11  -1   9   11.67   15.68
 -11   1 -10 1195.32   94.02
  11   1  10 1329.00   99.38
 -11  -1 -10 1415.44  109.32
  11  -1  10 1207.72   92.96
 -11   1 -11  105.98   26.50
  11   1  11  136.13   26.73
 -11  -1 -11  191.97   34.33
  11  -1  11  135.53   24.28
 -11   1 -12  206.02   37.39
  11   1  12  212.83   36.67
 -11  -1 -12  181.09   32.06
  11  -1  12  166.30   36.48
 -11   1 -13    1.02    6.09
  11   1  13    6.27    5.15
 -11  -1 -13   10.34    8.62
  11  -1  13   16.10   12.98
 -11   1 -14  398.39   44.23
  11   1  14  365.45   41.52
 -11  -1 -14  455.46   49.86
  11  -1  14  454.63   47.81
 -11   2  14  419.61   52.75
 -11  -2  14  437.48   53.57
 -11   2  13  206.65   32.56
 -11  -2  13  166.77   29.94
 -11   2  12   80.68   24.94
 -11  -2  12  131.59   23.62
 -11  -2  12   63.00   28.95
 -11   2  11  201.21   33.20
 -11  -2  11  268.52   35.96
 -11  -2  11  227.04   33.31
 -11   2  10  314.29   40.59
 -11  -2  10  523.60   56.86
 -11  -2  10  430.46   50.24
 -11   2   9  368.76   44.40
 -11  -2   9  525.93   49.13
 -11  -2   9  358.06   38.92
 -11   2   8   19.78   15.68
 -11  -2   8   10.88    9.44
 -11   2   7  462.36   46.73
 -11   2   7  426.57   49.88
 -11  -2   7  561.13   59.80
 -11  -2   7  369.76   41.63
 -11   2   6 1844.28  128.56
 -11   2   6 1392.50  104.01
 -11  -2   6 2156.27  153.49
 -11  -2   6 1438.52  105.61
 -11   2   5  351.66   89.41
 -11   2   5  285.61   30.85
 -11  -2   5  483.85   40.53
 -11  -2   5  318.33   30.54
 -11   2   4   93.37   14.44
 -11   2   4   81.22   17.18
 -11  -2   4  126.79   18.32
 -11  -2   4   79.79   15.65
 -11   2   3  933.72   39.91
 -11   2   3  779.73   41.40
 -11  -2   3 1297.78   55.92
 -11  -2   3  778.45   38.32
 -11   2   2  857.70   38.14
 -11   2   2  615.49   37.16
 -11  -2   2  986.82   47.55
 -11  -2   2  659.89   35.97
 -11   2   1  116.93   20.20
 -11   2   1  102.28   16.96
 -11  -2   1  145.89   21.70
 -11  -2   1   86.55   14.17
 -11   2   0   67.16   17.27
 -11   2   0   95.28   19.05
 -11  -2   0  103.10   17.47
 -11  -2   0   68.73   12.74
 -11   2  -1 1233.82   52.92
 -11   2  -1  887.68   43.53
 -11  -2  -1 1487.55   62.69
 -11  -2  -1  998.70   42.73
 -11   2  -2 2162.64   81.97
 -11   2  -2 1746.22   70.12
 -11  -2  -2 2578.81   98.97
 -11  -2  -2 1745.03   64.83
 -11   2  -3  114.22   19.70
 -11   2  -3   62.09   13.77
 -11  -2  -3  146.62   20.59
 -11  -2  -3   48.37    9.53
 -11   2  -4   18.71    9.19
 -11  -2  -4    9.72   11.47
  11  -2   4    9.89   11.99
 -11   2  -5  390.11   36.03
  11   2   5  352.39   31.15
 -11  -2  -5  551.04   50.04
  11  -2   5  352.93   33.59
 -11   2  -6   66.52   23.24
  11   2   6  104.64   19.49
 -11  -2  -6  131.55   25.93
  11  -2   6   81.18   19.71
 -11   2  -7    7.11    7.99
  11   2   7    1.37    4.02
 -11  -2  -7    6.58   12.84
  11  -2   7   11.73   16.68
 -11   2  -8  360.11   38.76
  11   2   8  356.33   37.66
 -11  -2  -8  575.24   57.70
  11  -2   8  314.68   34.02
 -11   2  -9  872.26   73.16
  11   2   9  852.14   66.20
 -11  -2  -9 1203.74   93.24
  11  -2   9  926.82   77.16
 -11   2 -10  254.55   35.96
  11   2  10  321.03   40.00
 -11  -2 -10  404.03   51.42
  11  -2  10  250.42   35.46
 -11   2 -11   15.90   19.15
  11   2  11   17.98   16.12
 -11  -2 -11   47.83   21.91
  11  -2  11   29.16   27.25
 -11   2 -12  232.80   45.29
  11   2  12  325.49   30.30
 -11  -2 -12  290.26   45.40
  11  -2  12  248.81   43.36
 -11   2 -13  347.98   45.63
 -11  -2 -13  464.00   58.21
  11  -2  13  311.63   40.86
 -11   2 -14   18.23   13.74
 -11  -2 -14   21.77   18.13
  11  -2  14    6.01   19.54
 -11   3  14   20.08   18.17
 -11  -3  14   21.30   20.37
 -11   3  13    6.78    6.11
 -11  -3  13   26.34   13.75
 -11   3  12   73.77   23.37
 -11  -3  12  141.00   27.68
 -11  -3  12  145.96   26.91
 -11   3  11  241.42   36.74
 -11  -3  11  348.60   46.30
 -11  -3  11  342.52   46.82
 -11   3  10   13.50   12.59
 -11  -3  10   15.43   14.37
 -11  -3  10   12.42   11.11
 -11  -3   9  726.66   33.62
 -11  -3   9  537.93   64.81
 -11   3   8  295.59   34.71
 -11  -3   8  386.14   39.89
 -11  -3   8  293.37   36.78
 -11   3   7 1210.93   73.58
 -11  -3   7 1700.94   95.77
 -11  -3   7 1232.47   72.88
 -11   3   6  136.88   17.89
 -11   3   6  110.31   22.06
 -11  -3   6  189.20   26.93
 -11  -3   6   97.11   20.51
 -11   3   5  437.96   44.83
 -11   3   5  353.80   40.96
 -11  -3   5  508.71   56.05
 -11  -3   5  398.64   44.74
 -11   3   4  231.94   23.06
 -11   3   4  267.31   28.54
 -11  -3   4  343.90   33.49
 -11  -3   4  229.27   23.33
 -11   3   3  325.68   28.96
 -11   3   3  291.71   30.81
 -11  -3   3  445.91   42.73
 -11  -3   3  332.49   30.18
 -11   3   2    6.25    5.44
 -11   3   2   20.79    9.67
 -11  -3   2   14.08   13.66
 -11  -3   2    8.11    5.07
 -11   3   1  343.23   30.55
 -11   3   1  301.42   31.64
 -11  -3   1  409.95   36.80
 -11  -3   1  270.49   25.02
 -11   3   0  154.46   34.98
 -11   3   0  132.53   22.09
 -11  -3   0  190.01   28.06
 -11  -3   0  114.75   14.17
 -11   3  -1  184.31   20.85
 -11   3  -1  182.07   23.23
 -11  -3  -1  261.16   28.15
 -11  -3  -1  138.58   15.90
 -11   3  -2  102.71   21.25
 -11   3  -2   59.40   16.64
 -11  -3  -2  133.02   25.93
 -11  -3  -2  102.53   14.19
 -11   3  -3 1747.67  125.64
 -11   3  -3 1604.29  119.45
 -11  -3  -3 2402.90  170.72
 -11  -3  -3 1527.43  108.44
 -11   3  -4  169.92   27.68
  11   3   4  232.19   28.99
 -11  -3  -4  352.33   42.15
  11  -3   4  196.61   27.95
 -11   3  -5   72.20   16.90
  11   3   5   44.66   14.39
 -11  -3  -5   83.50   22.56
  11  -3   5   61.49   17.20
 -11   3  -6   66.48   20.85
  11   3   6   54.47   13.92
 -11  -3  -6  115.14   26.25
  11  -3   6   75.93   31.41
 -11   3  -7 1347.22   90.80
  11   3   7 1310.76   83.71
 -11  -3  -7 2020.49  133.76
  11  -3   7 1358.55   93.53
 -11   3  -8  317.69   40.20
  11   3   8  295.86   35.00
 -11  -3  -8  397.76   47.77
  11  -3   8  330.67   44.26
 -11   3  -9   10.54    7.40
 -11  -3  -9    7.52    9.08
  11  -3   9   14.45   16.17
 -11   3 -10   81.83   23.04
 -11  -3 -10  127.47   24.26
  11  -3  10   55.09   34.18
 -11   3 -11  987.08   47.26
 -11  -3 -11 1220.01  112.60
  11  -3  11  958.39   88.88
 -11   3 -12   48.20   33.12
 -11  -3 -12  111.68   29.37
  11  -3  12   75.34   24.98
 -11   3 -13   72.70   29.93
 -11  -3 -13   73.04   27.48
  11  -3  13   74.68   28.79
 -11   4  13   24.79   14.08
 -11  -4  13   31.92   24.60
 -11  -4  13   18.20   10.40
 -11   4  12  128.65   23.56
 -11  -4  12  133.94   26.67
 -11  -4  12   97.00   27.93
 -11   4  11    9.59   14.74
 -11  -4  11   17.54   10.15
 -11  -4  11    3.35    9.82
 -11   4  10 1076.20   79.29
 -11  -4  10 1231.59   88.13
 -11  -4  10 1033.42   73.83
 -11   4   9   31.33   14.91
 -11  -4   9   42.56   21.69
 -11  -4   9   54.29   15.29
 -11   4   8    6.51    5.58
 -11  -4   8   17.90   16.94
 -11  -4   8    5.80    5.82
 -11   4   7    9.67   12.36
 -11  -4   7   19.71   12.92
 -11  -4   7    7.49    5.81
 -11   4   6 1266.90   89.61
 -11  -4   6 1537.89  102.28
 -11  -4   6 1265.18   84.03
 -11   4   5   67.64   79.76
 -11  -4   5   12.69   16.19
 -11  -4   5   10.69    9.71
 -11   4   4   35.67   12.29
 -11   4   4   44.47   14.11
 -11  -4   4   99.90   23.46
 -11  -4   4   53.19   10.57
 -11   4   3  203.14   25.03
 -11   4   3  190.26   34.33
 -11  -4   3  263.97   34.70
 -11  -4   3  194.04   24.44
 -11   4   2 2006.52  142.19
 -11   4   2 2017.71  146.77
 -11  -4   2 2811.57  200.58
 -11  -4   2 2003.96  142.93
 -11   4   1   18.05    5.79
 -11   4   1   19.08   10.23
 -11  -4   1   80.13   21.63
 -11  -4   1   25.70    7.22
 -11   4   0  178.08   25.41
 -11   4   0  126.92   21.06
 -11  -4   0  194.27   26.17
 -11  -4   0  161.69   20.30
 -11   4  -1    9.01    6.28
 -11   4  -1   43.26   16.18
 -11  -4  -1   16.19    8.71
 -11  -4  -1   34.45    8.74
 -11   4  -2 1104.52   82.97
 -11   4  -2 1096.25   86.34
 -11  -4  -2 1759.19  132.32
 -11  -4  -2 1070.60   78.24
 -11   4  -3   31.49   27.65
 -11  -4  -3  105.71   19.69
 -11  -4  -3   75.05   12.28
  11  -4   3   86.04   21.53
 -11   4  -4  257.42   34.55
  11   4   4  270.68   32.20
 -11  -4  -4  453.72   55.21
  11  -4   4  299.89   39.42
 -11   4  -5    9.39    9.25
  11   4   5    7.71    4.26
 -11  -4  -5    6.79    6.29
  11  -4   5   15.76   14.98
 -11   4  -6  610.10   48.74
 -11  -4  -6  847.51   63.00
  11  -4   6  625.34   53.65
 -11   4  -7    5.32    5.56
 -11  -4  -7   19.46   14.72
  11  -4   7    4.57   10.83
 -11   4  -8  588.47   57.23
 -11  -4  -8  848.62   77.72
  11  -4   8  601.95   55.83
 -11   4  -9   22.71   13.38
 -11  -4  -9   31.02   10.56
  11  -4   9   14.50   22.59
 -11   4 -10  120.37   41.03
 -11  -4 -10  181.77   31.33
  11  -4  10  211.21   38.41
 -11   4 -11    8.43   13.59
 -11  -4 -11   11.03   10.44
  11  -4  11   14.29   11.14
 -11   4 -12  303.69   36.82
 -11  -4 -12  326.03   39.03
  11  -4  12  262.85   33.53
 -11   5  11  613.90   78.67
 -11  -5  11  762.94   83.95
 -11  -5  11  675.58   74.98
 -11  -5  10   19.29   17.86
 -11  -5  10    7.92   12.02
 -11   5   9  202.15   37.50
 -11  -5   9  275.12   42.68
 -11  -5   9  179.54   29.08
 -11   5   8   31.89   18.81
 -11  -5   8   37.40   15.38
 -11  -5   8   10.19    6.80
 -11   5   7  456.12   50.46
 -11  -5   7  556.85   53.94
 -11  -5   7  468.75   44.14
 -11   5   6  131.27   28.97
 -11  -5   6  160.94   28.69
 -11  -5   6   94.40   17.79
 -11   5   5  450.70   53.07
 -11  -5   5  681.31   74.79
 -11  -5   5  462.69   51.34
 -11   5   4  199.01   35.97
 -11  -5   4  309.48   40.07
 -11  -5   4  212.07   35.83
 -11   5   3  402.56   38.47
 -11   5   3  377.61   41.70
 -11  -5   3  545.33   52.97
 -11  -5   3  415.90   38.66
 -11   5   2   11.10   12.50
 -11   5   2   16.11   15.36
 -11  -5   2   16.31   14.32
 -11  -5   2    6.74    7.59
 -11   5   1 1173.29   79.59
 -11   5   1 1126.09   77.88
 -11  -5   1 1655.92  111.18
 -11  -5   1 1154.31   75.26
 -11   5   0  222.94   25.56
 -11   5   0  210.23   28.04
 -11  -5   0  339.50   48.48
 -11   5  -1  244.59   27.90
 -11   5  -1  235.74   31.61
 -11  -5  -1  303.21   37.53
 -11   5  -2   11.28   11.59
 -11  -5  -2   11.82   10.71
  11  -5   2    9.92    8.02
 -11   5  -3  903.90   64.93
 -11  -5  -3 1524.49  104.65
  11  -5   3  954.35   71.39
 -11   5  -4    4.37    6.53
 -11  -5  -4   29.08   16.43
  11  -5   4    7.79   13.50
 -11   5  -5   10.37   10.54
 -11  -5  -5   36.74   24.58
  11  -5   5   12.80   13.57
 -11   5  -6   63.83   24.79
 -11  -5  -6   81.96   24.35
  11  -5   6   52.73   16.95
 -11   5  -7 1356.33  105.11
 -11  -5  -7 2295.33   65.77
  11  -5   7 1578.57   63.76
 -11   5  -8    6.96   11.32
 -11  -5  -8   25.92   14.91
  11  -5   8   15.43   19.94
 -11   5  -9   10.21   13.19
 -11  -5  -9   37.10   17.18
  11  -5   9   11.55   19.47
 -11   5 -10   31.97   21.81
 -11  -5 -10   45.89   13.70
  11  -5  10   75.20   22.86
 -11   5 -11  382.04   49.00
 -11  -5 -11  536.24   53.32
  11  -5  11  363.84   43.54
 -11   6  10  377.23   51.42
 -11  -6  10  450.11   49.84
 -11  -6  10  409.25   44.36
 -11   6   9  269.92   37.17
 -11  -6   9  384.13   51.23
 -11  -6   9  259.42   30.31
 -11   6   8   89.36   22.93
 -11  -6   8   81.51   33.91
 -11  -6   8   28.35   19.37
 -11   6   7   75.36   21.26
 -11  -6   7   68.74   19.92
 -11  -6   7   73.12   20.44
 -11   6   6  197.55   34.61
 -11  -6   6  320.35   47.13
 -11  -6   6  252.01   36.05
 -11   6   5  162.05   30.94
 -11  -6   5  260.01   48.17
 -11   6   4    9.15   16.70
 -11  -6   4   12.98   13.92
 -11   6   3  197.78   39.10
 -11  -6   3  295.92   40.51
 -11   6   2  424.96   49.80
 -11  -6   2  734.68   73.22
 -11   6   1   90.42   21.27
 -11   6   1   63.62   20.87
 -11  -6   1  108.56   25.14
 -11   6   0   77.69   17.66
 -11   6   0   34.52   21.90
 -11  -6   0   71.10   20.75
 -11   6  -1  324.12   41.33
 -11  -6  -1  602.06   36.87
  11  -6   1  388.08   49.45
 -11   6  -2  606.20   55.34
 -11  -6  -2  876.59   79.59
  11  -6   2  591.87   58.65
 -11   6  -3    1.49    7.15
  11  -6   3    8.82    9.69
 -11   6  -4  185.28   32.97
 -11  -6  -4  334.63   46.65
  11  -6   4  214.51   34.26
 -11   6  -5  578.44   63.58
 -11  -6  -5 1181.14  108.74
  11  -6   5  799.64   79.41
 -11   6  -6  372.09   47.52
 -11  -6  -6  691.57   70.26
  11  -6   6  442.97   47.54
 -11   6  -7    4.40   11.81
 -11  -6  -7   13.32   13.11
  11  -6   7    8.71   12.15
 -11   6  -8  162.61   28.11
 -11  -6  -8  276.39   35.66
  11  -6   8  199.77   32.16
 -11   6  -9  170.88   27.64
 -11  -6  -9  254.25   37.62
  11  -6   9  245.33   36.47
 -11   7   7    6.99   13.25
 -11  -7   7   20.02   10.92
 -11   7   6    7.33    5.74
 -11  -7   6    6.31    7.94
 -11   7   5  145.73   25.79
 -11  -7   5  151.18   23.97
 -11   7   4  343.00   36.54
 -11  -7   4  452.35   45.46
 -11   7   3   78.96   19.25
 -11  -7   3   73.78   22.94
 -11   7   2    5.13    5.08
 -11  -7   2   15.75    9.50
 -11  -7   1  209.02   33.85
 -11   7   0  337.66   33.89
 -11  -7   0  572.43   58.19
  11  -7   0  352.26   43.51
 -11   7  -1   24.39   19.67
 -11  -7  -1   40.55   20.90
  11  -7   1   10.79   16.15
 -11   7  -2  125.88   23.20
 -11  -7  -2  175.12   27.93
  11  -7   2   91.19   30.90
 -11   7  -3  111.69   21.99
 -11  -7  -3  104.83   28.16
  11  -7   3   48.95   31.58
 -11   7  -4  358.20   48.14
 -11  -7  -4  639.43   59.63
  11  -7   4  424.56   51.68
 -11   7  -5    8.03    7.10
 -11  -7  -5   18.52    9.60
  11  -7   5   16.73   15.51
 -11   7  -6   71.89   23.89
 -11  -7  -6  124.63   23.96
  11  -7   6  102.42   21.08
 -11   7  -7   54.94   30.65
 -11  -7  -7  142.60   28.22
  11  -7   7   56.24   31.88
 -11  -8   1  196.58   34.57
  11  -8  -1  139.84   25.90
 -11  -8   0   32.39   22.57
  11  -8   0    4.43    6.55
 -11  -8  -1  554.49   60.01
  11  -8   1  392.16   45.38
 -12   0  14   79.29   37.70
 -12   0  13   13.49   12.24
 -12   0  12  494.25   55.04
 -12   0  11   19.17    7.90
 -12   0  10  181.73   29.69
 -12   0   9    3.73    5.84
 -12   0   9   11.86   13.85
 -12   0   8  924.21   63.30
 -12   0   8  556.87   45.72
 -12   0   7   10.87   11.05
 -12   0   7    8.87    8.07
 -12   0   6  714.72  135.09
 -12   0   6  369.01   43.16
 -12   0   5    9.13   10.32
 -12   0   4  171.61   22.00
 -12   0   4   90.57   21.13
 -12   0   3   10.12    7.29
 -12   0   3    6.28   11.83
 -12   0   2 2119.83  149.72
 -12   0   2 1337.53  100.40
 -12   0   1   11.78    9.88
 -12   0   1   17.68   10.90
 -12   0   0 1177.53   88.89
 -12   0   0  836.42   64.34
 -12   0  -1    3.00    7.49
 -12   0  -1    3.45    4.21
 -12   0  -2 1613.08  117.60
 -12   0  -2 1136.02   85.62
 -12   0  -3    8.01    4.92
 -12   0  -3    7.94    4.32
 -12   0  -4  319.12   38.53
 -12   0  -4  211.62   27.70
 -12   0  -5   42.80   20.46
  12   0   5    4.89   10.46
 -12   0  -6  611.27   71.37
  12   0   6  540.55   38.59
 -12   0  -7   12.40   16.04
  12   0   7   10.29   12.69
 -12   0  -8   32.51   21.18
  12   0   8   32.46   11.37
 -12   0  -9    5.90   11.62
  12   0   9    5.47    8.10
 -12   0 -10 1759.13  118.87
  12   0  10 1423.80   96.75
  12   0  11    8.15   10.30
 -12   0 -12   94.76   29.91
  12   0  12  160.85   26.42
 -12   0 -13   28.54   12.90
  12   0  13   11.13    9.97
 -12   1  14  128.47   25.79
 -12  -1  14  120.21   27.57
 -12   1  13   37.26   16.75
 -12  -1  13   27.83   21.52
 -12   1  12   18.36   11.51
 -12   1  11  723.31   61.12
 -12  -1  11  732.32   62.00
 -12   1  10   80.02   20.33
 -12  -1  10  100.00   20.83
 -12  -1  10   62.22   22.44
 -12   1   9   39.68   29.11
 -12  -1   9   91.80   25.00
 -12  -1   9   35.33   12.58
 -12   1   8   25.05   19.33
 -12  -1   8   26.69   11.92
 -12  -1   8   15.27   10.16
 -12   1   7 2323.22  121.66
 -12   1   7 1661.74   96.09
 -12  -1   7 2586.78  136.34
 -12  -1   7 1684.61   96.87
 -12   1   6   72.70   16.75
 -12   1   6   29.58   16.67
 -12  -1   6   83.64   12.80
 -12  -1   6   68.87   14.96
 -12   1   5    7.47   11.31
 -12   1   5   16.10   12.98
 -12  -1   5   13.71   11.25
 -12  -1   5   12.00    7.87
 -12   1   4  136.76   23.04
 -12   1   4   92.19   20.70
 -12  -1   4  178.34   24.20
 -12  -1   4  112.91   21.25
 -12   1   3  796.71   61.37
 -12   1   3  515.70   44.93
 -12  -1   3  879.67   69.45
 -12  -1   3  531.63   45.05
 -12   1   2   83.01   16.43
 -12   1   2   61.89   12.63
 -12  -1   2   70.45   15.32
 -12  -1   2   68.49   14.44
 -12   1   1  865.57   66.46
 -12   1   1  624.69   54.17
 -12  -1   1  938.42   72.14
 -12  -1   1  534.53   45.20
 -12   1   0  387.85   35.57
 -12   1   0  257.35   28.62
 -12  -1   0  440.57   42.24
 -12  -1   0  321.29   30.89
 -12   1  -1 2511.56  176.68
 -12   1  -1 1942.59  139.02
 -12  -1  -1 2944.96  208.63
 -12  -1  -1 1870.97  133.71
 -12   1  -2  275.53   29.67
 -12   1  -2  237.43   24.60
 -12  -1  -2  297.37   31.98
 -12  -1  -2  186.67   25.58
 -12   1  -3  937.86   75.60
 -12   1  -3  623.68   51.10
 -12  -1  -3  942.11   73.26
 -12  -1  -3  613.66   50.43
 -12   1  -4   54.73   17.01
 -12  -1  -4   47.09   14.50
 -12  -1  -4   44.45   11.97
 -12   1  -5  523.24   59.34
  12   1   5  395.59   43.38
 -12  -1  -5  597.13   65.54
  12  -1   5  428.53   50.32
 -12   1  -6   13.40   12.10
  12   1   6   18.19   17.28
 -12  -1  -6   32.59   18.80
  12  -1   6   13.78   12.82
 -12   1  -7 1114.62   81.45
  12   1   7  872.37   61.34
 -12  -1  -7 1240.91   86.28
  12  -1   7  926.26   66.14
 -12   1  -8  230.60   43.37
  12   1   8  232.47   40.28
 -12  -1  -8  316.76   57.36
  12  -1   8  191.52   35.12
 -12   1  -9  645.38   59.01
  12   1   9  495.76   45.89
 -12  -1  -9  600.31   59.69
  12  -1   9  552.02   52.92
 -12   1 -10   10.22   12.62
  12   1  10   10.08    8.55
 -12  -1 -10    6.45   14.15
  12  -1  10    9.46   14.69
 -12   1 -11  762.85   74.33
  12   1  11  816.82   76.75
 -12  -1 -11  825.46   81.61
  12  -1  11  700.89   73.51
 -12   1 -12   52.04   26.65
  12   1  12   96.55   24.99
 -12  -1 -12   85.47   26.51
  12  -1  12   43.55   22.56
 -12   1 -13   28.85   11.56
  12   1  13   18.82   17.06
 -12  -1 -13   39.80   17.59
  12  -1  13   28.06   26.11
 -12   2  13  171.96   29.17
 -12  -2  13  139.75   24.80
 -12   2  12  204.59   34.81
 -12  -2  12  179.00   28.31
 -12   2  11    3.41   13.54
 -12  -2  11    7.03    7.47
 -12  -2  11   11.47    5.37
 -12   2  10  327.24   46.54
 -12  -2  10  374.05   45.98
 -12  -2  10  278.99   37.81
 -12   2   9  746.07   67.26
 -12  -2   9 1169.87   93.07
 -12  -2   9  754.37   66.16
 -12   2   8  418.58   49.78
 -12  -2   8  652.84   70.32
 -12  -2   8  361.45   46.90
 -12   2   7   14.71   12.33
 -12  -2   7   22.33   18.01
 -12  -2   7   23.31   14.61
 -12   2   6  673.58   41.71
 -12   2   6  479.69   37.32
 -12  -2   6  822.28   58.63
 -12  -2   6  545.70   41.33
 -12   2   5  966.75   56.73
 -12   2   5  844.57   55.54
 -12  -2   5 1177.44   74.61
 -12  -2   5  801.26   52.70
 -12   2   4  263.10   31.47
 -12   2   4  194.13   31.68
 -12  -2   4  331.44   40.15
 -12  -2   4  207.36   34.79
 -12   2   3   24.46   10.55
 -12   2   3   31.93   15.72
 -12  -2   3   47.29   16.61
 -12  -2   3   20.48   13.32
 -12   2   2  709.98   55.75
 -12   2   2  540.91   51.39
 -12  -2   2  814.33   64.54
 -12  -2   2  537.45   45.23
 -12   2   1  958.70   73.10
 -12   2   1  726.12   61.40
 -12  -2   1 1258.16   94.50
 -12  -2   1  832.98   63.76
 -12   2   0  166.14   20.69
 -12   2   0  121.70   21.60
 -12  -2   0  283.60   32.15
 -12  -2   0  129.97   16.54
 -12   2  -1  349.06   31.83
 -12   2  -1  235.51   26.61
 -12  -2  -1  378.30   36.14
 -12  -2  -1  245.38   24.66
 -12   2  -2  633.76   59.75
 -12   2  -2  419.65   47.12
 -12  -2  -2  806.58   66.56
 -12  -2  -2  546.93   44.86
 -12   2  -3  612.33   51.99
 -12   2  -3  538.65   49.18
 -12  -2  -3  859.76   69.11
 -12  -2  -3  536.84   43.70
 -12   2  -4   32.86   25.85
 -12  -2  -4   33.41   15.92
  12  -2   4   37.50   14.64
 -12   2  -5  562.87   43.78
  12   2   5  537.62   36.10
 -12  -2  -5  713.47   54.68
  12  -2   5  545.09   40.18
 -12   2  -6  567.79   54.13
  12   2   6  578.59   44.05
 -12  -2  -6  700.09   67.84
  12  -2   6  501.75   49.42
 -12   2  -7  450.65   46.69
  12   2   7  472.46   45.74
 -12  -2  -7  606.39   59.17
  12  -2   7  468.56  132.32
 -12   2  -8   12.36   11.79
  12   2   8    3.59    8.21
 -12  -2  -8   93.46   79.05
  12  -2   8   12.80   12.59
 -12   2  -9  370.11   47.02
  12   2   9  389.41   45.38
 -12  -2  -9  488.18   59.30
  12  -2   9  392.81   59.02
 -12   2 -10  491.16   65.25
  12   2  10  405.55   50.65
 -12  -2 -10  549.08   70.62
  12  -2  10  341.50   50.92
 -12   2 -11  164.18   27.40
  12   2  11  174.25   26.25
 -12  -2 -11  230.12   40.62
  12  -2  11  144.07   36.16
 -12   2 -12   62.29   23.82
 -12  -2 -12   63.42   17.96
  12  -2  12   57.69   16.56
 -12   2 -13  217.65   34.24
 -12  -2 -13  264.67   33.83
  12  -2  13  230.89   39.94
 -12   3  12  134.57   24.02
 -12  -3  12  127.88   29.78
 -12  -3  12  111.85   23.64
 -12   3  11  332.30   36.60
 -12  -3  11  391.87   46.78
 -12  -3  11  347.86   37.12
 -12   3  10  433.91   50.19
 -12  -3  10  567.57   62.72
 -12  -3  10  417.95   50.30
 -12   3   9    7.13   13.59
 -12  -3   9    7.78   10.96
 -12  -3   9    3.70    7.49
 -12   3   8  508.84   52.60
 -12  -3   8  808.85   69.58
 -12  -3   8  582.05   54.67
 -12   3   7  156.54   31.93
 -12  -3   7  209.85   37.45
 -12  -3   7  156.11   29.58
 -12   3   6  635.96   51.84
 -12  -3   6  743.05   67.12
 -12  -3   6  534.92   42.18
 -12   3   5   27.31    9.39
 -12   3   5   17.29   16.46
 -12  -3   5   25.39   15.23
 -12  -3   5   15.00    8.34
 -12   3   4  970.10   56.99
 -12   3   4  907.29   59.17
 -12  -3   4 1343.23   80.99
 -12  -3   4  859.18   53.05
 -12   3   3  429.48   49.61
 -12   3   3  377.32   46.11
 -12  -3   3  510.96   62.03
 -12  -3   3  440.41   33.28
 -12   3   2  589.17   38.18
 -12   3   2  498.57   37.36
 -12  -3   2  695.03   49.45
 -12  -3   2  452.14   32.24
 -12   3   1  124.86   27.08
 -12   3   1  134.34   22.77
 -12  -3   1  260.66   34.99
 -12  -3   1   99.70   18.94
 -12   3   0  929.58   77.32
 -12   3   0  830.40   67.25
 -12  -3   0 1283.00   98.83
 -12  -3   0  900.78   68.85
 -12   3  -1  133.05   23.44
 -12   3  -1   86.83   29.39
 -12  -3  -1  150.16   30.59
 -12  -3  -1   96.19   18.52
 -12   3  -2    8.94   10.66
 -12   3  -2    9.65    6.73
 -12  -3  -2    5.53   14.12
 -12  -3  -2   13.86    6.82
 -12   3  -3   31.08   13.62
 -12  -3  -3   35.55   16.94
 -12  -3  -3   35.67   13.88
 -12   3  -4 1034.12   64.37
  12   3   4  907.16   56.75
 -12  -3  -4 1473.69   92.04
  12  -3   4  872.38   56.76
 -12   3  -5  108.80   22.37
  12   3   5  152.87   15.27
 -12  -3  -5  161.18   30.83
  12  -3   5  139.78   28.28
 -12   3  -6   52.92   20.42
  12   3   6   62.27   16.82
 -12  -3  -6   50.12   19.68
  12  -3   6   16.69   22.19
 -12   3  -7  167.76   34.39
  12   3   7  130.18   30.70
 -12  -3  -7  215.88   41.08
  12  -3   7  189.60   37.16
 -12   3  -8  701.08   67.78
 -12  -3  -8 1155.71   96.05
  12  -3   8  722.98   64.62
 -12   3  -9   92.21   20.62
 -12  -3  -9   99.23   24.94
  12  -3   9   27.10   24.41
 -12   3 -10   72.06   24.09
 -12  -3 -10   66.35   19.75
  12  -3  10   51.15   28.00
 -12   3 -11   28.14   17.77
 -12  -3 -11   76.05   29.05
  12  -3  11   76.91   22.52
 -12   3 -12  141.28   25.56
 -12  -3 -12  146.08   26.95
  12  -3  12  126.51   22.89
 -12   4  11   16.07    9.05
 -12  -4  11   12.35   12.73
 -12  -4  11   17.00   14.52
 -12   4  10   11.24   11.65
 -12  -4  10    2.72    9.14
 -12  -4  10    6.68    8.59
 -12   4   9  836.21   79.87
 -12  -4   9 1026.92   93.36
 -12  -4   9  854.83   79.59
 -12   4   8   19.85   18.79
 -12  -4   8   27.37   23.79
 -12  -4   8   21.10   11.02
 -12   4   7   23.20   12.01
 -12  -4   7   38.84   26.35
 -12  -4   7   26.70   10.08
 -12   4   6   14.08    9.32
 -12  -4   6   19.13   12.73
 -12  -4   6    7.14    3.72
 -12   4   5  999.73   79.88
 -12  -4   5 1439.00  109.00
 -12  -4   5 1008.25   77.18
 -12   4   4   59.27   13.72
 -12   4   4   27.41    9.80
 -12  -4   4   80.99   24.25
 -12  -4   4   51.42   14.14
 -12   4   3  140.50   23.62
 -12   4   3   99.94   22.07
 -12  -4   3  214.65   35.03
 -12  -4   3  104.42   18.96
 -12   4   2   60.46   19.26
 -12   4   2   95.95   26.08
 -12  -4   2  132.28   24.78
 -12  -4   2   92.60   17.94
 -12   4   1 1337.87   86.51
 -12   4   1 1160.77   82.35
 -12  -4   1 1777.17  116.37
 -12  -4   1 1176.96   77.58
 -12   4   0   22.64   15.15
 -12   4   0   52.84   21.15
 -12  -4   0   12.82   18.93
 -12  -4   0   24.44    7.84
 -12   4  -1  327.99   38.91
 -12   4  -1  356.99   43.03
 -12  -4  -1  585.49   57.70
 -12  -4  -1  341.88   33.51
 -12   4  -2    3.36    6.09
 -12   4  -2   15.71   15.30
 -12  -4  -2   10.68   17.73
 -12  -4  -2    1.50    2.42
 -12   4  -3  793.67   57.47
 -12  -4  -3 1231.89   87.92
  12  -4   3 1017.80   76.09
 -12   4  -4   60.95   19.38
 -12  -4  -4   61.98   19.46
  12  -4   4   52.94   18.85
 -12   4  -5  490.72   56.50
 -12  -4  -5  823.73   89.41
  12  -4   5  555.58   65.53
 -12   4  -6  107.02   30.10
 -12  -4  -6  114.12   26.04
  12  -4   6  131.10   30.68
 -12   4  -7  413.69   53.92
 -12  -4  -7  496.92   62.06
  12  -4   7  334.87   50.98
 -12   4  -8    8.51    9.86
 -12  -4  -8   20.98   13.90
  12  -4   8   15.67   18.48
 -12   4  -9  792.68   68.65
 -12  -4  -9 1174.15   96.30
  12  -4   9  794.94   68.80
 -12   4 -10   19.98   10.49
 -12  -4 -10   40.35   18.58
  12  -4  10   21.30   18.36
 -12   4 -11  200.18   30.64
 -12  -4 -11  252.59   35.10
  12  -4  11  205.68   30.74
 -12   5  10  443.70   46.72
 -12  -5  10  640.89   62.87
 -12  -5  10  468.38   46.72
 -12   5   9   23.44   14.14
 -12  -5   9   10.15   14.32
 -12  -5   9    9.55   10.91
 -12   5   8  116.43   23.64
 -12  -5   8  137.04   32.79
 -12  -5   8  135.06   24.59
 -12   5   7  106.79   22.19
 -12  -5   7  160.65   33.67
 -12  -5   7  112.85   21.80
 -12   5   6  325.37   53.19
 -12  -5   6  433.33   56.84
 -12  -5   6  245.20   37.57
 -12   5   5   23.04   15.90
 -12  -5   5   25.60   21.10
 -12  -5   5    5.26    7.77
 -12   5   4  411.88   51.75
 -12  -5   4  586.69   37.35
 -12  -5   4  356.00   41.72
 -12   5   3   37.88   14.40
 -12  -5   3   93.00   21.11
 -12  -5   3   40.20   12.38
 -12   5   2  258.28   32.21
 -12   5   2  304.17   40.67
 -12  -5   2  446.68   54.67
 -12   5   1   69.02   21.06
 -12   5   1   54.73   16.36
 -12  -5   1   77.56   18.52
 -12   5   0  938.98   76.89
 -12   5   0  899.87   81.66
 -12  -5   0 1278.23  106.02
 -12   5  -1  109.74   20.84
 -12   5  -1   57.13   20.52
 -12  -5  -1  141.35   34.10
 -12   5  -2   92.71   24.30
 -12  -5  -2  154.04   28.00
  12  -5   2  105.90   22.14
 -12   5  -3   24.48   39.73
 -12  -5  -3   64.78   19.91
  12  -5   3   16.96   12.27
 -12   5  -4  944.86   70.43
 -12  -5  -4 1674.36  115.08
  12  -5   4 1116.24   81.11
 -12   5  -5   20.21   13.25
 -12  -5  -5   23.42   22.69
  12  -5   5   14.57   11.87
 -12   5  -6   11.23   15.09
 -12  -5  -6   13.57   16.88
  12  -5   6   18.35   19.75
 -12   5  -7   99.92   27.76
 -12  -5  -7  138.61   26.66
  12  -5   7   83.09   21.12
 -12   5  -8  451.97   43.90
 -12  -5  -8  841.22   74.73
  12  -5   8  535.90   51.64
 -12   5  -9   15.65   17.72
 -12  -5  -9   11.24    9.22
  12  -5   9   17.11   14.48
 -12   6   8  122.82   28.76
 -12  -6   8  106.87   31.49
 -12   6   7   10.85   10.86
 -12  -6   7   11.81   11.78
 -12   6   6   57.17   19.59
 -12  -6   6   55.27   21.62
 -12   6   5  193.66   31.71
 -12  -6   5  367.00   46.36
 -12   6   4   72.28   25.54
 -12  -6   4  140.73   25.64
 -12   6   3   21.81    8.50
 -12  -6   3   16.38   12.97
 -12   6   2  179.40   34.81
 -12  -6   2  375.40   54.40
 -12   6   1  424.16   48.13
 -12  -6   1  618.30   68.11
 -12   6   0   36.76   17.64
 -12   6   0   16.72   10.39
 -12  -6   0   62.52   21.35
 -12   6  -1  179.19   32.49
 -12  -6  -1  187.71   33.93
  12  -6   1   98.42   30.06
 -12   6  -2  219.10   34.53
 -12  -6  -2  300.68   48.28
  12  -6   2  145.96   46.03
 -12   6  -3  279.03   27.08
 -12  -6  -3  438.94   34.72
  12  -6   3  308.82   33.65
 -12  -6  -4   22.38   14.70
  12  -6   4    8.30   12.84
 -12   6  -5  112.17   21.87
 -12  -6  -5  175.72   30.40
  12  -6   5  166.94   32.01
 -12   6  -6  189.01   25.51
 -12  -6  -6  350.82   45.59
  12  -6   6  196.04   28.60
 -12   6  -7   99.44   24.56
 -12  -6  -7   95.05   38.76
  12  -6   7   48.59   21.23
 -12   7   5    9.34   10.83
 -12  -7   5   17.42   14.11
 -12   7   4   47.29   27.59
 -12  -7   4   67.16   28.00
 -12   7   3  531.07   54.15
 -12  -7   3  758.57   75.16
 -12   7   2   22.91   15.62
 -12  -7   1   23.46   19.19
 -12  -7   0  347.99   42.13
  12  -7   0  221.08   30.22
 -12   7  -1  178.50   24.34
 -12  -7  -1  325.56   38.45
  12  -7   1  222.32   30.07
 -12   7  -2    8.17    7.44
 -12  -7  -2    2.89    8.63
  12  -7   2    3.40    6.78
 -12   7  -3  165.59   26.91
 -12  -7  -3  306.13   45.63
  12  -7   3  212.10   31.64
 -12   7  -4   53.27   27.47
 -12  -7  -4  146.89   28.55
  12  -7   4   86.34   22.07
 -13   0  12   10.90    6.86
 -13   0  11  388.31   41.86
 -13   0  10    9.28    3.11
 -13   0   9  433.62   56.67
 -13   0   8   14.69   11.61
 -13   0   8   13.03    8.80
 -13   0   7  871.83   38.91
 -13   0   7  560.05   64.41
 -13   0   6    6.23    8.89
 -13   0   6   13.04    8.88
 -13   0   5  974.39   67.14
 -13   0   5  541.25   44.82
 -13   0   4   16.56   14.47
 -13   0   4    7.53    9.15
 -13   0   3   35.80   19.35
 -13   0   3    5.92    3.36
 -13   0   2    4.70   11.05
 -13   0   2   26.26   13.62
 -13   0   1 3010.11  159.13
 -13   0   1 1859.33  103.74
 -13   0   0    7.38    7.63
 -13   0   0   14.69    9.90
 -13   0  -1  255.81   38.84
 -13   0  -1  213.01   31.14
 -13   0  -2    3.78   11.53
 -13   0  -2    5.49    8.93
 -13   0  -3 1700.12   96.65
 -13   0  -3 1300.64   79.09
 -13   0  -4   19.48   18.76
 -13   0  -5   23.69   18.81
  13   0   5   18.75   15.68
 -13   0  -6   15.63   11.53
  13   0   6   10.92   14.39
 -13   0  -7 2029.74   61.25
  13   0   7 1510.17  119.21
 -13   0  -8   12.66   18.33
  13   0   8   12.05    6.20
 -13   0  -9  111.83   23.37
  13   0   9  119.10   25.82
 -13   0 -10   11.67   16.92
  13   0  10    7.04    7.13
 -13   0 -11  547.28   68.33
  13   0  11  411.15   56.11
 -13   0 -12   19.46   15.94
  13   0  12    5.20    3.95
 -13   1  12    7.25   18.11
 -13  -1  12   15.10   13.92
 -13   1  11   19.90   24.22
 -13  -1  11    6.28   23.17
 -13   1  10  825.52   80.95
 -13  -1  10  744.68   75.20
 -13   1   9   32.89   18.52
 -13  -1   9   56.49   12.92
 -13  -1   9   28.72   15.65
 -13   1   8   22.93   16.20
 -13  -1   8   29.40   12.30
 -13  -1   8   11.16   10.92
 -13   1   7   30.51   15.75
 -13   1   7   37.84   15.56
 -13  -1   7   50.55   13.62
 -13  -1   7   33.84   16.42
 -13   1   6 1077.36   81.35
 -13   1   6  764.10   66.97
 -13  -1   6 1208.35   92.61
 -13  -1   6  695.23   60.76
 -13   1   5   28.91   12.66
 -13   1   5   11.90    9.80
 -13  -1   5   20.79   12.28
 -13  -1   5   16.68    9.44
 -13   1   4  164.34   27.45
 -13   1   4  119.33   24.75
 -13  -1   4  175.68   28.51
 -13  -1   4  130.86   23.26
 -13   1   3  301.96   36.98
 -13   1   3  259.67   35.93
 -13  -1   3  366.74   47.13
 -13  -1   3  222.98   30.74
 -13   1   2 1236.83   72.34
 -13   1   2  922.68   60.32
 -13  -1   2 1367.74   80.20
 -13  -1   2  812.24   53.34
 -13   1   1   59.31   24.14
 -13   1   1   45.01   22.42
 -13  -1   1   59.15   30.24
 -13  -1   1   38.47   16.63
 -13   1   0  122.60   22.42
 -13   1   0  102.15   22.56
 -13  -1   0  134.23   24.05
 -13  -1   0   66.99   15.58
 -13   1  -1  605.48   69.21
 -13   1  -1  480.45   37.18
 -13  -1  -1  726.89   53.30
 -13  -1  -1  419.78   32.30
 -13   1  -2  647.24   49.59
 -13   1  -2  478.56   38.83
 -13  -1  -2  803.24   57.24
 -13  -1  -2  467.47   33.59
 -13   1  -3  104.12   22.06
 -13   1  -3   54.00   13.92
 -13  -1  -3   66.44   19.74
 -13  -1  -3   59.42   13.47
 -13   1  -4  385.14   40.81
 -13  -1  -4  347.34   38.03
  13  -1   4  266.26   31.50
 -13   1  -5  229.52   29.13
  13   1   5  173.34   23.19
 -13  -1  -5  290.33   33.80
 -13   1  -6  438.35   57.14
  13   1   6  476.67   55.70
 -13  -1  -6  544.38   62.41
  13  -1   6  460.27   52.93
 -13   1  -7   14.97    9.23
  13   1   7    9.20    7.83
 -13  -1  -7   13.46   12.16
  13  -1   7   12.21   15.86
 -13   1  -8  521.42   65.06
  13   1   8  570.26   46.39
 -13  -1  -8  643.20   81.72
  13  -1   8  489.95   60.96
 -13   1  -9  241.95   41.87
  13   1   9  162.55   27.43
 -13  -1  -9  195.01   37.52
  13  -1   9  210.55   34.82
 -13   1 -10   85.48   25.02
  13   1  10   89.61   27.93
 -13  -1 -10  116.06   33.12
  13  -1  10   58.34   23.53
 -13   1 -11   18.48   13.13
  13   1  11   18.51   26.79
 -13  -1 -11   22.19   12.84
  13  -1  11   24.96   20.86
 -13   1 -12  416.26   46.68
  13   1  12  404.04   43.61
 -13  -1 -12  316.21   38.68
  13  -1  12  324.78   43.22
 -13   2  12  113.87   23.91
 -13  -2  12  146.12   25.55
 -13   2  11  209.01   35.26
 -13  -2  11  270.98   28.34
 -13   2  10   26.71   11.36
 -13  -2  10   16.43    8.35
 -13  -2  10   15.37   12.32
 -13   2   9  334.55   40.86
 -13  -2   9  434.71   59.69
 -13  -2   9  215.54   34.59
 -13   2   8  450.28   56.98
 -13  -2   8  756.37   87.31
 -13  -2   8  425.11   58.54
 -13   2   7  200.18   29.75
 -13  -2   7  346.25   43.36
 -13  -2   7  219.55   35.68
 -13   2   6   15.78   17.92
 -13  -2   6   10.41    6.55
 -13  -2   6   14.42    7.83
 -13   2   5  619.00   65.93
 -13   2   5  366.41   58.51
 -13  -2   5  746.46   80.80
 -13  -2   5  469.58   53.93
 -13   2   4  768.53   55.69
 -13   2   4  618.92   49.84
 -13  -2   4 1006.95   70.41
 -13  -2   4  593.34   49.28
 -13   2   3   86.84   21.46
 -13   2   3   42.56   17.08
 -13  -2   3   92.46   24.98
 -13  -2   3   52.32   13.73
 -13   2   2    6.33    6.16
 -13   2   2   12.07    7.11
 -13  -2   2    9.37    5.49
 -13   2   1  680.59   50.27
 -13   2   1  495.51   38.77
 -13  -2   1 1014.55   63.98
 -13  -2   1  549.37   39.60
 -13   2   0  960.43   63.57
 -13   2   0  686.96   48.01
 -13  -2   0 1166.64   85.15
 -13  -2   0  732.97   47.28
 -13   2  -1   20.46   10.76
 -13   2  -1   16.05   13.85
 -13  -2  -1    7.52    4.09
 -13   2  -2  118.28   23.98
 -13   2  -2  116.49   24.35
 -13  -2  -2  204.43   34.16
 -13  -2  -2  109.25   19.25
 -13   2  -3  521.58   53.37
 -13   2  -3  478.74   51.84
 -13  -2  -3  680.79   63.48
 -13  -2  -3  419.67   41.56
 -13   2  -4   92.68   20.82
 -13  -2  -4   95.03   24.70
  13  -2   4   97.44   21.62
 -13   2  -5   31.02   13.94
  13   2   5   41.57   10.84
 -13  -2  -5   44.53   33.13
  13  -2   5   19.77   16.10
 -13   2  -6  452.11   55.71
  13   2   6  383.27   45.38
 -13  -2  -6  505.93   60.39
  13  -2   6  316.10   42.20
 -13   2  -7  944.36   82.18
  13   2   7  831.18   69.07
 -13  -2  -7  987.16   85.03
  13  -2   7  775.31   67.94
 -13   2  -8  149.20   28.72
  13   2   8  171.07   28.45
 -13  -2  -8  233.77   39.52
  13  -2   8  190.49   30.89
 -13   2  -9   89.47   28.08
  13   2   9   68.88   22.48
 -13  -2  -9   61.96   16.90
  13  -2   9   22.57   31.49
 -13   2 -10  298.12   40.04
 -13  -2 -10  356.05   49.40
  13  -2  10  240.82   42.91
 -13   2 -11  270.38   38.14
 -13  -2 -11  306.96   51.33
  13  -2  11  258.11   33.08
 -13   3  11  333.30   39.72
 -13  -3  11  493.44   48.58
 -13  -3  11  380.19   50.03
 -13   3  10  126.78   23.82
 -13  -3  10  195.50   44.30
 -13  -3  10  142.99   25.09
 -13   3   9  417.55   44.09
 -13  -3   9  706.88   60.06
 -13  -3   9  500.57   48.72
 -13   3   8   22.87   20.01
 -13  -3   8    5.97   11.53
 -13  -3   8    8.83   11.46
 -13   3   7  518.78   51.69
 -13  -3   7  774.72   43.17
 -13  -3   7  457.46   56.16
 -13   3   6  148.95   26.73
 -13  -3   6  224.42   37.53
 -13  -3   6  165.15   25.56
 -13   3   5   30.60   14.60
 -13  -3   5   78.06   22.83
 -13  -3   5   33.67   12.73
 -13   3   4   43.00   14.30
 -13   3   4   37.85   15.66
 -13  -3   4  124.06   27.04
 -13  -3   4   38.48   11.01
 -13   3   3 1153.36   89.57
 -13   3   3 1052.03   85.67
 -13  -3   3 1633.42  121.44
 -13  -3   3 1141.78   86.66
 -13   3   2  288.51   35.75
 -13   3   2  272.41   38.59
 -13  -3   2  413.05   50.98
 -13  -3   2  303.76   36.97
 -13   3   1   29.80   11.12
 -13   3   1   34.57   13.63
 -13  -3   1   25.82   11.86
 -13  -3   1   20.94   11.67
 -13   3   0  103.83   21.87
 -13   3   0  120.99   25.78
 -13  -3   0  150.53   29.54
 -13  -3   0  140.69   23.35
 -13   3  -1 1670.46  107.92
 -13   3  -1 1458.19  100.55
 -13  -3  -1 2228.26  147.28
 -13  -3  -1 1433.67   92.07
 -13   3  -2  340.10   42.03
 -13   3  -2  321.07   41.82
 -13  -3  -2  502.45   59.42
 -13  -3  -2  296.17   36.26
 -13   3  -3    9.74   17.42
 -13  -3  -3   48.60   18.21
 -13  -3  -3   38.99   12.39
 -13   3  -4   75.01   19.79
  13   3   4   53.67   20.00
 -13  -3  -4  121.89   27.74
  13  -3   4   63.76   22.02
 -13   3  -5  800.61   70.81
  13   3   5  778.24   64.99
 -13  -3  -5 1080.32   91.42
  13  -3   5  817.49   71.99
 -13   3  -6  111.66   20.76
  13   3   6  108.85   26.81
 -13  -3  -6  203.19   25.31
  13  -3   6  115.03   22.51
 -13   3  -7   73.16   27.19
 -13  -3  -7  150.34   27.14
  13  -3   7  102.44   22.00
 -13   3  -8  183.06   40.56
 -13  -3  -8  299.13   45.74
  13  -3   8  254.60   65.62
 -13   3  -9 1008.10   83.57
 -13  -3  -9 1383.07  109.97
  13  -3   9 1054.07   91.26
 -13   3 -10   13.58   10.89
 -13  -3 -10   33.47   19.00
  13  -3  10   23.48   20.12
 -13   4  10    9.69    8.17
 -13  -4  10    3.70    8.21
 -13  -4  10   15.16   12.48
 -13   4   9    7.69   13.14
 -13  -4   9   12.59    9.73
 -13  -4   9   16.02   11.42
 -13   4   8  689.70   62.18
 -13  -4   8  973.84   81.61
 -13  -4   8  704.25   59.56
 -13   4   7   14.23   14.96
 -13  -4   7    7.06   13.87
 -13  -4   7    4.24    6.76
 -13   4   6   29.06   16.21
 -13  -4   6   24.27   18.51
 -13  -4   6   25.36   25.38
 -13   4   5   15.67    9.77
 -13  -4   5   31.91   16.15
 -13  -4   5    6.76   12.63
 -13   4   4 1090.31   83.38
 -13  -4   4 1609.71  109.85
 -13  -4   4 1072.69   74.71
 -13   4   3   77.89   19.36
 -13   4   3   95.42   25.87
 -13  -4   3   66.52   38.20
 -13  -4   3   51.10   13.38
 -13   4   2  137.13   23.06
 -13   4   2  177.29   29.13
 -13  -4   2  254.87   38.38
 -13  -4   2  109.85   19.19
 -13   4   1    4.13    6.72
 -13   4   1    8.65    6.07
 -13  -4   1    5.38   12.12
 -13  -4   1   10.91    6.24
 -13   4   0  843.54   69.92
 -13   4   0  816.47   70.85
 -13  -4   0 1262.24  104.21
 -13  -4   0  782.84   64.49
 -13   4  -1   16.40    9.81
 -13   4  -1   17.53    8.46
 -13  -4  -1   60.06   21.85
 -13  -4  -1   11.49    6.65
 -13   4  -2  275.95   36.97
 -13   4  -2  319.35   41.50
 -13  -4  -2  486.36   59.56
 -13   4  -3    6.09    7.18
 -13  -4  -3    7.36   12.08
  13  -4   3    9.10   10.70
 -13   4  -4  431.36   73.29
 -13  -4  -4  683.97   81.45
  13  -4   4  526.68   37.62
 -13   4  -5   19.27   13.07
 -13  -4  -5   14.19   15.72
  13  -4   5   21.54   19.31
 -13   4  -6  656.85   64.79
 -13  -4  -6 1012.66   96.72
  13  -4   6  625.59   65.44
 -13   4  -7    4.05   11.83
 -13  -4  -7   22.48   15.04
  13  -4   7    9.68   14.45
 -13   4  -8  131.25   26.71
 -13  -4  -8  173.92   26.62
  13  -4   8  114.68   22.44
 -13   4  -9   19.35   19.98
 -13  -4  -9   20.42   18.04
  13  -4   9    9.07    9.06
 -13   5   8   22.97   19.96
 -13  -5   8   11.72    8.54
 -13   5   7  155.24   24.66
 -13  -5   7  325.36   39.12
 -13  -5   7  256.79   24.02
 -13   5   6   96.57   24.19
 -13  -5   6  207.41   31.62
 -13  -5   6  124.63   20.33
 -13   5   5  135.86   33.88
 -13  -5   5  301.67   41.61
 -13  -5   5  143.87   21.94
 -13   5   4   22.49    9.76
 -13  -5   4    8.55   10.28
 -13  -5   4   16.01   13.21
 -13   5   3  477.47   57.59
 -13  -5   3  809.43   80.76
 -13   5   2   26.39   17.52
 -13  -5   2   24.95   15.53
 -13   5   1   49.17   20.67
 -13   5   1   30.91   22.21
 -13  -5   1   32.36   22.23
 -13   5   0   12.92   13.73
 -13   5   0    7.98    5.36
 -13  -5   0   28.97   23.55
 -13   5  -1  572.37   58.58
 -13   5  -1  517.08   56.61
 -13  -5  -1 1005.22   94.24
 -13   5  -2   17.84   18.25
 -13  -5  -2   18.62   17.31
  13  -5   2   13.42   17.84
 -13   5  -3   28.37   14.73
 -13  -5  -3   49.07   20.37
  13  -5   3   13.15   16.77
 -13   5  -4   77.79   20.68
 -13  -5  -4  132.43   30.54
  13  -5   4   98.32   27.23
 -13   5  -5  591.39   53.15
 -13  -5  -5  977.54   82.26
  13  -5   5  629.81   58.42
 -13   5  -6   58.20   15.98
 -13  -5  -6   79.41   21.78
  13  -5   6   51.71   15.23
 -13   5  -7    8.98   15.11
 -13  -5  -7   18.95   14.47
  13  -5   7   19.30   21.45
 -13   5  -8   13.36   17.36
 -13  -5  -8   24.02   16.55
 -13   6   6   14.30   16.38
 -13  -6   6   14.36   10.21
 -13   6   5  183.71   28.83
 -13  -6   5  227.43   32.19
 -13   6   4  376.06   47.96
 -13  -6   4  591.85   69.37
 -13   6   3   69.48   20.22
 -13  -6   3   80.34   22.86
 -13   6   2   78.00   27.00
 -13  -6   2  163.38   25.24
 -13   6   1  156.61   29.24
 -13  -6   1  295.84   53.35
 -13   6   0  289.23   41.22
 -13  -6   0  472.67   59.47
 -13   6  -1    4.46    9.23
 -13  -6  -1    9.53   19.58
  13  -6   1    3.62    7.97
 -13   6  -2   97.04   37.45
 -13  -6  -2  140.13   29.74
  13  -6   2  103.86   20.93
 -13   6  -3  338.52   43.15
 -13  -6  -3  457.15   59.01
  13  -6   3  387.16   49.62
 -13   6  -4  148.58   24.90
 -13  -6  -4  166.80   33.75
  13  -6   4   99.98   25.89
 -13   6  -5   23.69   17.70
 -13  -6  -5   27.17   16.88
  13  -6   5   13.52   15.77
 -14   0  11   11.43   15.94
 -14   0  10  280.34   38.63
 -14   0   9    9.63    9.85
 -14   0   8  637.94   68.34
 -14   0   7    3.51    7.08
 -14   0   7    9.48    8.53
 -14   0   6  421.53   51.75
 -14   0   6  220.13   32.99
 -14   0   5   14.57    9.03
 -14   0   5   13.90    8.51
 -14   0   4 1515.51  113.59
 -14   0   4  914.94   73.45
 -14   0   3   11.04   13.46
 -14   0   3    9.21    7.69
 -14   0   2  509.71   58.39
 -14   0   2  320.35   39.74
 -14   0   1   14.68    9.08
 -14   0   1    5.96    5.14
 -14   0   0  976.35   78.50
 -14   0   0  549.67   62.22
 -14   0  -1    6.05    9.30
 -14   0  -1   20.34    9.10
 -14   0  -2   14.52    7.24
 -14   0  -2   12.74   10.05
 -14   0  -3    5.14   12.41
 -14   0  -3    2.65    4.82
 -14   0  -4  636.54   61.23
  14   0   4  538.90   51.47
 -14   0  -5   25.56   24.93
  14   0   5    9.13   15.12
 -14   0  -6   26.16   18.67
  14   0   6   26.93   20.02
 -14   0  -7    6.33   11.94
  14   0   7   11.74    8.98
 -14   0  -8  628.50   59.75
  14   0   8  440.98   42.45
 -14   0  -9    3.51    7.45
  14   0   9    6.21   11.35
 -14   0 -10   98.86   24.73
  14   0  10   82.34   20.71
 -14   1  11   12.25   10.01
 -14  -1  10   23.34   12.92
 -14   1   9  589.04   53.82
 -14  -1   9  604.72   54.95
 -14   1   8    8.11    9.57
 -14  -1   8   49.11   18.61
 -14  -1   8    9.05    9.90
 -14   1   7   20.52    9.07
 -14  -1   7   38.18   19.76
 -14  -1   7   16.04    7.03
 -14   1   6  148.95   23.92
 -14  -1   6  166.97   26.62
 -14  -1   6   93.91   23.86
 -14   1   5  503.06   59.58
 -14   1   5  341.67   45.01
 -14  -1   5  615.03   31.23
 -14  -1   5  347.72   46.88
 -14   1   4   34.73    9.23
 -14   1   4   26.55   13.71
 -14  -1   4   19.97   10.77
 -14  -1   4   17.75   14.37
 -14   1   3  209.86   35.30
 -14   1   3  213.30   39.46
 -14  -1   3  304.85   50.90
 -14  -1   3  192.81   34.47
 -14   1   2  248.54   42.50
 -14   1   2  100.52   23.39
 -14  -1   2  237.49   42.29
 -14  -1   2  136.48   26.37
 -14   1   1 1239.47   94.84
 -14   1   1  868.58   70.63
 -14  -1   1 1447.56  108.69
 -14  -1   1  888.97   71.73
 -14   1   0  158.22   30.33
 -14   1   0   95.74   21.83
 -14  -1   0  104.04   23.71
 -14  -1   0  125.12   26.05
 -14   1  -1  507.48   60.24
 -14   1  -1  326.65   42.37
 -14  -1  -1  558.40   63.52
 -14  -1  -1  376.44   45.51
 -14   1  -2   55.85   24.82
 -14   1  -2   28.14   14.00
 -14  -1  -2   20.10   13.05
 -14  -1  -2   27.48   12.75
 -14   1  -3  349.10   44.45
 -14   1  -3  242.45   36.41
 -14  -1  -3  406.95   49.15
 -14  -1  -3  224.87   18.77
 -14   1  -4   24.66   22.77
  14   1   4    2.97    9.68
 -14  -1  -4   19.32   13.87
  14  -1   4   13.74   10.26
  14   1   5  676.96   52.83
 -14  -1  -5  956.73   76.48
  14  -1   5  668.09   55.63
 -14   1  -6  105.25   24.91
  14   1   6   45.02   34.43
 -14  -1  -6   51.36   39.37
  14  -1   6   81.09   21.71
 -14   1  -7  424.31   49.53
  14   1   7  306.76   24.71
 -14  -1  -7  470.29   58.10
  14  -1   7  355.33   41.64
 -14   1  -8   10.56   15.34
 -14  -1  -8   23.42   15.24
  14  -1   8    9.88    6.32
 -14   1  -9  481.40   59.38
  14   1   9  459.17   57.59
 -14  -1  -9  468.42   58.77
  14  -1   9  505.96   59.44
 -14   1 -10   30.52   25.68
  14   1  10    7.90   20.27
 -14  -1 -10   89.43   39.28
  14  -1  10   20.37   12.88
 -14   2  10  222.40   30.89
 -14  -2  10  201.14   30.24
 -14   2   9    3.73    9.40
 -14  -2   9   17.13   13.15
 -14  -2   9    1.68    5.13
 -14   2   8  234.65   34.76
 -14  -2   8  474.05   40.16
 -14  -2   8  237.01   40.32
 -14   2   7  161.62   31.91
 -14  -2   7  290.82   42.97
 -14  -2   7  135.74   31.06
 -14   2   6   82.86   19.69
 -14  -2   6  150.89   41.03
 -14  -2   6   80.22   17.67
 -14   2   5  184.93   29.91
 -14  -2   5  244.89   36.87
 -14  -2   5  157.95   26.93
 -14   2   4  492.53   44.81
 -14   2   4  288.01   42.90
 -14  -2   4  553.67   72.44
 -14  -2   4  322.07   40.51
 -14   2   3  285.46   37.51
 -14   2   3  166.92   26.71
 -14  -2   3  341.41   46.30
 -14  -2   3  247.37   33.68
 -14   2   2   18.52   15.52
 -14   2   2   30.52   12.52
 -14  -2   2   80.03   19.83
 -14  -2   2   44.00   13.95
 -14   2   1  293.65   42.28
 -14   2   1  251.47   35.78
 -14  -2   1  391.21   47.09
 -14  -2   1  214.47   36.91
 -14   2   0  900.21   71.85
 -14   2   0  882.93   73.70
 -14  -2   0 1278.71  100.00
 -14  -2   0  769.64   62.27
 -14   2  -1  357.93   43.24
 -14   2  -1  262.58   38.63
 -14  -2  -1  427.85   53.00
 -14  -2  -1  240.07   31.45
 -14   2  -2   16.14    8.41
 -14   2  -2    6.99    7.87
 -14  -2  -2   18.25   12.31
 -14  -2  -2    4.00    4.36
 -14   2  -3  439.51   55.92
 -14   2  -3  346.67   48.92
 -14  -2  -3  454.84   56.95
 -14  -2  -3  316.52   40.53
 -14   2  -4  715.46   56.72
  14   2   4  560.29   45.92
 -14  -2  -4  781.47   60.96
  14  -2   4  503.38   61.61
 -14   2  -5  121.90   29.77
  14   2   5  134.59   28.79
 -14  -2  -5  162.15   30.08
  14  -2   5   99.18   23.09
 -14   2  -6   39.07   17.72
  14   2   6   69.06   18.61
 -14  -2  -6   38.77   20.54
  14  -2   6   65.32   21.31
 -14   2  -7  384.29   40.93
  14   2   7  387.25   36.87
 -14  -2  -7  433.91   56.19
  14  -2   7  368.76   39.31
 -14   2  -8  523.09   50.48
  14   2   8  481.21   45.11
 -14  -2  -8  635.02   59.82
  14  -2   8  449.24   45.45
 -14   2  -9  124.70   22.88
 -14  -2  -9  160.34   30.22
  14  -2   9  134.88   26.42
 -14   2 -10   29.18   24.99
  14  -2  10   39.89   34.51
 -14   3   9   70.08   32.96
 -14  -3   9  114.41   23.00
 -14  -3   9   29.19   22.24
 -14   3   8  285.96   40.38
 -14  -3   8  458.82   55.97
 -14  -3   8  279.16   36.94
 -14   3   7   24.02   13.38
 -14  -3   7   13.86   10.24
 -14  -3   7    7.21    5.29
 -14   3   6  464.85   52.94
 -14  -3   6  691.43   67.12
 -14  -3   6  423.72   47.09
 -14   3   5  164.86   33.58
 -14  -3   5  315.54   47.88
 -14  -3   5  210.41   32.99
 -14   3   4   82.82   19.07
 -14  -3   4   83.49   22.38
 -14  -3   4   56.51   19.88
 -14   3   3   19.39   14.24
 -14   3   3   32.75   16.65
 -14  -3   3   60.22   19.27
 -14  -3   3   38.80   11.63
 -14   3   2 1167.09   78.76
 -14   3   2 1053.82   81.62
 -14  -3   2 1618.87  116.16
 -14  -3   2 1016.37   72.51
 -14   3   1  173.66   35.87
 -14   3   1  169.44   29.33
 -14  -3   1  335.34   54.05
 -14  -3   1  169.30   25.61
 -14   3   0   47.28   17.15
 -14   3   0   30.14   16.55
 -14  -3   0   79.24   24.61
 -14  -3   0   43.79   14.02
 -14   3  -1   55.73   20.92
 -14   3  -1    5.72    7.89
 -14  -3  -1   46.65   23.27
 -14  -3  -1   26.76    8.13
 -14   3  -2 1002.83   71.83
 -14   3  -2  785.84   64.02
 -14  -3  -2 1296.82   92.99
 -14  -3  -2  804.47   58.12
 -14   3  -3  133.47   26.54
 -14  -3  -3  186.62   30.56
 -14  -3  -3  121.23   19.29
  14  -3   3  140.67   26.11
 -14   3  -4   20.22   11.74
  14   3   4    7.07    7.45
 -14  -3  -4   43.74   25.66
  14  -3   4   21.52   13.18
 -14   3  -5  159.69   29.87
 -14  -3  -5  230.35   42.13
  14  -3   5  156.83   30.34
 -14   3  -6  681.54   60.51
 -14  -3  -6  960.70   81.73
  14  -3   6  554.73   51.79
 -14   3  -7    9.73    9.08
 -14  -3  -7   13.81   14.26
  14  -3   7   23.00   16.45
 -14   3  -8  164.62   38.89
 -14  -3  -8  138.09   43.11
  14  -3   8  202.39   28.70
 -14   3  -9  114.25   26.72
 -14  -3  -9   54.87   27.29
  14  -3   9   68.21   28.08
 -14   4   8    9.07    6.23
 -14  -4   8   14.69   10.78
 -14  -4   8    2.33    5.88
 -14   4   7  576.31   67.57
 -14  -4   7  835.67   91.55
 -14  -4   7  450.51   53.25
 -14   4   6   13.66    9.91
 -14  -4   6   17.95   19.19
 -14  -4   6    6.88    7.20
 -14   4   5   86.62   20.95
 -14  -4   5  104.87   28.31
 -14  -4   5   65.75   17.08
 -14   4   4   22.60   12.35
 -14  -4   4   22.89   14.99
 -14  -4   4   14.44   11.51
 -14   4   3  623.98   67.70
 -14  -4   3  959.37   92.19
 -14  -4   3  571.01   54.57
 -14   4   2   13.40   11.05
 -14   4   2   11.61   10.56
 -14  -4   2   13.78   12.56
 -14  -4   2   17.36    7.46
 -14   4   1  277.78   42.41
 -14   4   1  318.26   37.65
 -14  -4   1  465.51   49.76
 -14  -4   1  259.50   36.77
 -14   4   0   12.82   12.13
 -14  -4   0   31.13   25.83
 -14   4  -1  321.45   48.55
 -14   4  -1  266.97   42.22
 -14  -4  -1  402.63   58.65
 -14   4  -2    5.74    8.39
 -14  -4  -2   23.01   21.04
 -14   4  -3  434.62   46.61
 -14  -4  -3  725.31   77.30
  14  -4   3  501.30   54.52
 -14   4  -4   16.91   11.34
 -14  -4  -4   14.46    8.07
  14  -4   4   14.78   18.63
 -14   4  -5  247.11   35.04
 -14  -4  -5  363.77   59.38
  14  -4   5  245.42   40.28
 -14   4  -6   11.53   13.15
 -14  -4  -6   27.36   20.51
  14  -4   6    9.66    9.62
 -14   4  -7  406.14   43.76
 -14  -4  -7  706.36   71.54
  14  -4   7  393.44   42.82
 -14   5   6  472.65   51.57
 -14  -5   6  579.57   63.88
 -14   5   5   71.89   21.15
 -14  -5   5   34.71   22.04
 -14   5   4   57.81   16.57
 -14  -5   4  163.66   25.78
 -14   5   3    6.24    9.63
 -14  -5   3   18.23   15.06
 -14   5   2  495.15   61.14
 -14  -5   2  720.50   81.64
 -14   5   1    9.33    8.88
 -14  -5   1   13.23   16.59
 -14   5   0   12.60    7.35
 -14   5   0   24.41   15.68
 -14  -5   0   11.08   11.17
 -14   5  -1   41.68   20.72
 -14  -5  -1   50.90   30.20
 -14   5  -2  463.06   53.61
 -14  -5  -2  877.07   99.25
  14  -5   2  515.07   61.96
 -14   5  -3    8.36    7.13
 -14  -5  -3   34.96   21.29
  14  -5   3   25.34   14.29
 -14   5  -4    9.50   12.40
 -14  -5  -4   13.48    7.19
  14  -5   4   12.27   12.72
 -14   5  -5   39.47   23.98
 -14  -5  -5   81.41   35.12
  14  -5   5   21.86   15.26
 -15   0   9  179.94   28.86
 -15   0   8   15.79   11.28
 -15   0   7  439.50   43.51
 -15   0   6   17.73   12.68
 -15   0   6   12.15   16.78
 -15   0   5   83.01   20.20
 -15   0   5   70.87   22.27
 -15   0   4    5.00   14.86
 -15   0   4   11.77    6.86
 -15   0   3  981.95   73.91
 -15   0   3  690.89   54.62
 -15   0   2   29.76   16.39
 -15   0   2   17.40   13.83
 -15   0   1  209.68   21.60
 -15   0   1  181.84   29.92
 -15   0   0   13.86   15.56
 -15   0   0    8.80    7.47
 -15   0  -1  542.75   66.71
 -15   0  -1  280.33   44.43
 -15   0  -2   21.44   12.32
 -15   0  -2    7.80    6.07
 -15   0  -3  202.09   36.67
 -15   0  -3  112.09   22.02
 -15   0  -4   17.12    8.82
  15   0   4    6.40    7.96
 -15   0  -5 1265.01   52.53
  15   0   5 1029.68   84.01
 -15   0  -6   28.97   22.52
  15   0   6   18.15   11.36
 -15   0  -7    3.90   12.25
  15   0   7   12.20   10.13
  15   0   8    8.67    5.90
 -15   1   9   61.46   28.02
 -15  -1   9   51.58   19.81
 -15   1   8  453.54   56.54
 -15  -1   8  462.75   56.81
 -15   1   7   19.16   11.34
 -15  -1   7   16.42    8.65
 -15  -1   7    5.02    9.65
 -15   1   6  152.39   28.63
 -15  -1   6  236.07   33.24
 -15  -1   6  127.69   27.17
 -15   1   5  118.22   29.00
 -15   1   5   71.18   24.14
 -15  -1   5  130.77   32.16
 -15  -1   5   59.27   20.92
 -15   1   4 1004.50   93.79
 -15   1   4  573.64   65.85
 -15  -1   4 1003.41   95.32
 -15  -1   4  615.17   63.99
 -15   1   3   32.79   21.51
 -15   1   3   13.16    8.35
 -15  -1   3   15.69   14.64
 -15  -1   3    7.36   10.92
 -15   1   2  341.56   46.51
 -15   1   2  305.34   41.97
 -15  -1   2  403.74   65.46
 -15  -1   2  240.69   35.39
 -15   1   1   30.60   16.31
 -15   1   1   30.62    8.49
 -15  -1   1   10.61   17.12
 -15  -1   1   21.79    9.85
 -15   1   0  795.81   60.73
 -15   1   0  533.16   45.92
 -15  -1   0  968.23   71.96
 -15  -1   0  546.82   45.95
 -15   1  -1    4.23    7.40
 -15   1  -1   14.46    6.00
 -15  -1  -1   13.56   15.78
 -15  -1  -1   11.62   10.33
 -15   1  -2  494.60   62.06
 -15   1  -2  323.70   52.17
 -15  -1  -2  517.76   65.54
 -15  -1  -2  314.17   43.66
 -15   1  -3   76.95   21.83
 -15   1  -3   34.23   16.78
 -15  -1  -3   84.08   21.51
 -15  -1  -3   87.36   18.06
 -15   1  -4  143.98   35.74
  15   1   4   95.42   32.39
 -15  -1  -4  116.24   24.33
  15  -1   4  141.23   26.13
 -15   1  -5   12.38   11.88
  15   1   5    5.16    7.79
 -15  -1  -5    2.12    9.47
  15  -1   5    9.15   12.91
 -15   1  -6  568.45   54.62
  15   1   6  478.85   47.02
 -15  -1  -6  672.06   64.11
  15  -1   6  463.75   45.53
 -15   1  -7  172.30   30.64
  15   1   7  114.04   27.26
 -15  -1  -7  176.05   31.49
  15  -1   7   95.99   20.92
 -15   1  -8   37.24   19.62
  15   1   8   12.30   11.90
 -15  -1  -8   29.93   19.55
  15  -1   8    5.64    8.53
 -15   2   8   31.68   20.83
 -15  -2   8   34.95   19.73
 -15  -2   8   16.50   13.00
 -15   2   7  148.89   29.54
 -15  -2   7  267.36   40.08
 -15  -2   7  169.47   28.09
 -15   2   6  144.61   25.88
 -15  -2   6  211.50   38.08
 -15  -2   6  131.34   25.80
 -15   2   5   27.43   16.56
 -15  -2   5   51.02   21.97
 -15  -2   5    8.55    7.48
 -15   2   4  186.15   31.88
 -15  -2   4  217.26   34.78
 -15  -2   4  159.69   27.30
 -15   2   3  645.09   63.58
 -15   2   3  518.86   54.17
 -15  -2   3  821.57   79.12
 -15  -2   3  475.86   51.24
 -15   2   2  292.15   43.78
 -15   2   2  262.28   42.86
 -15  -2   2  365.83   52.33
 -15  -2   2  243.59   37.64
 -15   2   1   11.50   10.57
 -15   2   1   29.14   20.35
 -15  -2   1   51.17   20.48
 -15  -2   1   30.79   13.17
 -15   2   0  388.24   44.46
 -15   2   0  262.57   41.10
 -15  -2   0  476.19   51.33
 -15  -2   0  334.53   37.97
 -15   2  -1  637.26   63.71
 -15   2  -1  552.16   58.57
 -15  -2  -1  897.99   85.42
 -15  -2  -1  540.45   55.38
 -15   2  -2  138.02   32.12
 -15   2  -2  126.61   28.12
 -15  -2  -2  184.96   35.49
 -15  -2  -2  101.29   22.40
 -15   2  -3   30.23   15.37
 -15  -2  -3   18.98   12.77
 -15  -2  -3    8.97    6.34
 -15   2  -4  173.92   26.54
  15   2   4  161.85   26.04
 -15  -2  -4  209.72   36.18
  15  -2   4  172.21   27.65
 -15   2  -5  648.45   58.87
  15   2   5  511.97   50.99
 -15  -2  -5  809.20   69.56
  15  -2   5  539.65   53.44
  15   2   6   25.26   13.52
 -15  -2  -6   24.12   22.76
  15  -2   6   20.02   21.77
 -15   2  -7   17.78   15.17
 -15  -2  -7   45.63   23.22
  15  -2   7   29.45   25.82
 -15   3   7   88.21   22.22
 -15  -3   7  117.24   29.01
 -15  -3   7   65.62   23.59
 -15   3   6   28.07   15.75
 -15  -3   6   22.87   22.38
 -15  -3   6    3.32    5.52
 -15   3   5  447.39   58.44
 -15  -3   5  722.98   87.76
 -15  -3   5  433.40   57.83
 -15   3   4   69.83   22.00
 -15  -3   4  174.44   30.78
 -15  -3   4   67.89   19.33
 -15   3   3    8.92    7.81
 -15  -3   3   38.39   17.78
 -15  -3   3   11.59    7.41
 -15   3   2   62.72   26.78
 -15   3   2   73.54   23.06
 -15  -3   2  128.42   30.04
 -15  -3   2   40.56   13.30
 -15   3   1  633.74   56.99
 -15   3   1  519.61   49.51
 -15  -3   1  963.32   80.82
 -15  -3   1  560.59   51.99
 -15   3   0   23.99   16.72
 -15   3   0   50.16   18.24
 -15  -3   0   61.59   20.12
 -15  -3   0   34.78   11.54
 -15   3  -1   30.90   21.90
 -15   3  -1   15.40    7.51
 -15  -3  -1   38.78   23.10
 -15  -3  -1   27.35   11.20
 -15   3  -2   56.71   16.02
 -15   3  -2   50.09   18.52
 -15  -3  -2   97.06   31.03
 -15  -3  -2   54.90   16.11
 -15   3  -3  770.26   66.39
 -15  -3  -3 1116.58   91.23
  15  -3   3  576.97   53.16
 -15   3  -4   31.58   20.95
 -15  -3  -4   87.26   23.89
  15  -3   4   41.68   19.35
 -15   3  -5   57.50   18.31
 -15  -3  -5   32.54   18.30
  15  -3   5    9.21   14.58
 -15   3  -6   92.68   22.04
 -15  -3  -6  193.30   31.45
  15  -3   6  143.48   31.10
 -15   4   5    4.99   17.10
 -15  -4   5   17.75    9.48
 -15   4   4  124.18   24.87
 -15  -4   4  196.41   37.18
 -15  -4   4  134.88   30.77
 -15   4   3   14.36    9.30
 -15  -4   3   14.60   22.81
 -15  -4   3   14.88   11.19
 -15   4   2  252.09   26.79
 -15  -4   2  441.47   57.29
 -15   4   1   21.15   17.63
 -15  -4   1   15.65    7.02
 -15   4   0  355.73   44.79
 -15   4   0  257.64   32.54
 -15  -4   0  444.76   56.85
 -15   4  -1   18.17   19.48
 -15  -4  -1    8.94   19.45
 -15   4  -2  292.45   32.91
  15  -4   2  350.56   45.23
 -15   4  -3    5.49   11.22
 -15  -4  -3   11.82   11.32
  15  -4   3   24.48   18.07
 -15   4  -4  331.14   47.28
 -15  -4  -4  554.31   62.09
  15  -4   4  351.60   42.97
 -16   0   6  507.90   54.36
 -16   0   5    6.36    5.91
 -16   0   5   23.74   11.75
 -16   0   4    7.22   11.12
 -16   0   4   19.29   11.74
 -16   0   3    6.98    5.35
 -16   0   3    9.17    4.22
 -16   0   2 1264.29   99.62
 -16   0   2  815.35   71.01
 -16   0   1   29.21   14.23
 -16   0   1   25.06   15.22
 -16   0   0   23.63   16.73
 -16   0   0   28.23   14.51
 -16   0  -1   14.79    8.09
 -16   0  -2  822.28   91.92
 -16   0  -2  537.23   62.81
 -16   0  -3   19.25   14.91
 -16   0  -3   21.27   11.18
 -16   0  -4  143.39   31.26
  16   0   4   61.56   33.91
  16   0   5   13.85   14.46
 -16   1   6   23.62   15.66
 -16  -1   6    2.42    4.17
 -16  -1   6    9.24    9.66
 -16   1   5  105.59   24.68
 -16  -1   5  196.85   29.41
 -16  -1   5  166.37   26.41
 -16   1   4   54.15   27.52
 -16   1   4   46.38   27.83
 -16  -1   4   29.76   20.99
 -16  -1   4   47.63   25.75
 -16   1   3  774.38   87.75
 -16   1   3  544.52   73.16
 -16  -1   3  953.31  103.52
 -16  -1   3  485.99   59.44
 -16   1   2    7.80   10.75
 -16   1   2   30.43   12.67
 -16  -1   2    9.14    9.51
 -16  -1   2    3.22    3.85
 -16   1   1  220.15   36.94
 -16   1   1  190.08   31.15
 -16  -1   1  271.25   37.17
 -16  -1   1  143.21   24.29
 -16   1   0   82.87   21.43
 -16   1   0   72.10   20.56
 -16  -1   0   92.60   25.21
 -16  -1   0   68.15   18.96
 -16   1  -1  172.25   29.87
 -16   1  -1  122.74   24.18
 -16  -1  -1  209.94   27.35
 -16   1  -2   38.94   20.25
 -16   1  -2   21.51   14.48
 -16  -1  -2   82.59   27.45
 -16  -1  -2   47.82   15.03
 -16   1  -3  578.61   68.54
 -16  -1  -3  647.74   74.43
 -16  -1  -3  368.53   46.14
 -16   1  -4   27.54   19.10
  16   1   4   40.75   18.64
 -16  -1  -4   24.77   16.08
  16  -1   4   44.32   21.00
 -16   1  -5  204.07   38.62
  16   1   5  179.73   29.74
 -16  -1  -5  252.55   39.66
  16  -1   5  152.13   27.32
 -16   2   5  248.97   33.91
 -16  -2   5  394.66   43.85
 -16  -2   5  211.86   32.04
 -16   2   4   17.59   10.41
 -16  -2   4   16.67   15.93
 -16  -2   4   20.95   12.69
 -16   2   3   22.96   14.82
 -16  -2   3   35.38   22.39
 -16  -2   3   32.30   11.33
 -16   2   2  761.34   84.38
 -16   2   2  524.56   66.06
 -16  -2   2  713.76   80.21
 -16  -2   2  464.05   56.54
 -16   2   1   83.70   16.27
 -16   2   1   88.54   21.61
 -16  -2   1  129.42   26.00
 -16  -2   1   53.13   14.76
 -16   2   0    9.72   24.52
 -16   2   0   12.77    6.34
 -16  -2   0   16.98   13.55
 -16  -2   0    5.37    4.77
 -16   2  -1  326.43   44.46
 -16   2  -1  235.60   31.86
 -16  -2  -1  367.68   40.92
 -16  -2  -1  245.26   28.93
 -16   2  -2  302.29   32.84
 -16   2  -2  265.54   26.94
 -16  -2  -2  439.37   55.53
 -16  -2  -2  297.94   39.66
 -16   2  -3   65.02   25.90
 -16  -2  -3   68.12   31.84
 -16  -2  -3   52.53   21.91
  16  -2   3   27.43   27.10
 -16   2  -4   14.02   15.49
  16   2   4   31.83   15.59
 -16  -2  -4   11.84   10.83
  16  -2   4   13.06   15.47
 -16   3   3   44.49   19.60
 -16  -3   3   91.95   33.65
 -16  -3   3   48.80   19.57
 -16   3   2   21.24   14.05
 -16  -3   2    6.17   14.65
 -16  -3   2   12.79   10.13
 -16   3   1   63.37   29.87
 -16   3   1   32.89   27.04
 -16  -3   1  158.43   30.00
 -16  -3   1   75.06   15.75
 -16   3   0  480.45   48.00
 -16   3   0  353.33   52.65
 -16  -3   0  728.89   71.52
 -16   3  -1   40.70   18.73
 -16   3  -1   83.23   20.94
 -16  -3  -1   92.71   34.80
 -16   3  -2   28.10   22.81
 -16   3  -2   21.81   17.83
 -16  -3  -2   26.01   26.82
   0   0   0    0.00    0.00

_computing_structure_solution     'SHELXT 2014/5 (Sheldrick, 2014)'
;

_shelx_hkl_checksum   84858

#==============================================================================
#     End of CIF
#==============================================================================
